# Supplementary material for: The value of observed reservoir storage anomalies for improving the simulation of reservoir dynamics in large-scale hydrological models
Source: Copernicus journal article supplement (doi:10.5194/hess-29-4073-2025), 2025-09-03
Supplement: Supplementary file 1 [file hess-29-4073-2025-supplement.zip]

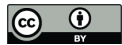

## *Supplement of*

# **The value of observed reservoir storage anomalies for improving the simulation of reservoir dynamics in large-scale hydrological models**

**Seyed-Mohammad Hosseini-Moghari and Petra Döll**

*Correspondence to:* Seyed-Mohammad Hosseini-Moghari ([hosseinimoghari@em.uni-frankfurt.de](mailto:hosseinimoghari@em.uni-frankfurt.de))

- [hess-29-4073-2025-supplement-title-page.pdf](#)
- Supplement
  - Results
    - \* [CH\\_results\\_calibrated\\_against\\_estimated\\_storage.xlsx](#)
    - \* [CH\\_results\\_calibrated\\_against\\_outflow.xlsx](#)
    - \* [CH\\_results\\_calibrated\\_against\\_storage.xlsx](#)
    - \* [CH\\_results\\_calibrated\\_against\\_storage\\_anomaly.xlsx](#)
    - \* [DH\\_results.xlsx](#)
    - \* [SA\\_results\\_calibrated\\_against\\_estimated\\_storage.xlsx](#)
    - \* [SA\\_results\\_calibrated\\_against\\_outflow.xlsx](#)
    - \* [SA\\_results\\_calibrated\\_against\\_storage.xlsx](#)
    - \* [SA\\_results\\_calibrated\\_against\\_storage\\_anomaly.xlsx](#)
    - \* [WA\\_results\\_calibrated\\_against\\_estimated\\_storage.xlsx](#)
    - \* [WA\\_results\\_calibrated\\_against\\_outflow.xlsx](#)
    - \* [WA\\_results\\_calibrated\\_against\\_storage.xlsx](#)
    - \* [WA\\_results\\_calibrated\\_against\\_storage\\_anomaly.xlsx](#)
    - \* [readme.txt](#)
  - [Supplement.pdf](#)

The copyright of individual parts of the supplement might differ from the article licence.
