# Supplementary material for: The value of observed reservoir storage anomalies for improving the simulation of reservoir dynamics in large-scale hydrological models
Source: Copernicus journal article supplement (doi:10.5194/hess-29-4073-2025), 2025-09-03
Supplement: Supplementary file 2 [file CH_results_calibrated_against_estimated_storage.xlsx]

## Sheet: Readme
	Sheet name	Note	Inflow source	Total number of reservoirs	Number of reservoirs where downstream demand is taken into account
	Outflow(WG inflow-No Demand)	Simulated outflow (×106 m3/month) where downstream demand is not considered for irrigation and supply reservoirs.	WaterGAP	100	0
	Storage(WG inflow-No Demand)	Simulated storage (×106 m3) where downstream demand is not considered for irrigation and supply reservoirs.	WaterGAP	100	0
	Outflow(WG inflow-With Demand)	Simulated outflow (×106 m3/month) where downstream demand is considered for irrigation and supply reservoirs.	WaterGAP	21	21
	Storage(WG inflow-With Demand)	Simulated storage (×106 m3) where downstream demand is considered for irrigation and supply reservoirs.	WaterGAP	21	21
	Outflow(OBS inflow-With Demand)	Simulated outflow (×106 m3/month) where downstream demand is considered for irrigation reservoirs.	Observed	35	2
	Storage(OBS inflow-With Demand)	Simulated storage (×106 m3) where downstream demand is considered for irrigation reservoirs.	Observed	35	2

## Sheet: Outflow(WG inflow-No Demand)
grand_id	a1	a3	1980-01	1980-02	1980-03	1980-04	1980-05	1980-06	1980-07	1980-08	1980-09	1980-10	1980-11	1980-12	1981-01	1981-02	1981-03	1981-04	1981-05	1981-06	1981-07	1981-08	1981-09	1981-10	1981-11	1981-12	1982-01	1982-02	1982-03	1982-04	1982-05	1982-06	1982-07	1982-08	1982-09	1982-10	1982-11	1982-12	1983-01	1983-02	1983-03	1983-04	1983-05	1983-06	1983-07	1983-08	1983-09	1983-10	1983-11
610	1	4	2060.87	4583.12	3663.81	2124	3935.16	4905.99	2090.51	1574.18	1518.11	1564.64	1506.92	1549.93	1543.56	1390.12	1750.74	1614.66	1541.77	1476.87	1362.25	1176.55	1134.71	1171.06	1131.47	1168.59	1208.45	1450.99	1616.92	1352.09	1201.29	1142.27	1150.69	1088.65	1059.51	1098.05	1068.46	1400.67	1388.12	1499.36	2043.77	1799.06	1280.27	1115.37	1275.61	1472.01	1387.83	1453.46	1392.85
753	0.8	2	1680.82	1522.66	1722.73	1861.12	2018.08	1779.81	1598.1	1446.1	1428.93	1524.05	1467.78	1566.29	1579.53	1415.06	1628.93	1617.08	1858.34	1994.73	1564.19	1412.28	1362.21	1460.49	1418.53	1458.28	1508.71	1339.11	1660.15	2260.71	2221.61	2036.59	1908.75	1666.4	1590.99	1725.99	1729.48	1798.67	1913.41	1657.83	1905.84	1901.64	2137.01	3181.32	1856.7	1693.12	1634.77	1760.64	1761.98
870	0.8	0.05	2085.15	1883.36	2085.15	2017.89	2085.15	2017.89	2085.15	2085.15	2017.89	2085.15	2017.89	2085.15	2085.15	1883.36	2085.15	2017.89	2085.15	2017.89	2085.15	1961.47	1898.19	1961.47	1898.19	1961.47	1961.47	1771.65	1961.47	1898.19	1961.47	1898.19	1961.47	2203.99	2132.89	2203.99	2132.89	2203.99	2203.99	1990.7	2203.99	2132.89	2381.6	2256.58	2203.99	2371.13	2294.64	2371.13	2294.64
597	1	4	1403.26	2484.88	2810.59	3216.54	5388.54	3633.77	1090.83	675.204	785.729	1039.63	1074.68	1063.49	970.636	727.381	756.436	1240.29	1828.47	1240.2	486.357	303.285	290.386	457.252	710.596	723.888	712.345	692.201	1550.43	1708.89	2764.15	2110.23	811.737	514.42	654.436	923.856	995.298	1149.47	1064.43	1261.81	2550.72	2329.82	3650.28	3669.85	1501.42	864.642	845.981	1033.76	1057.45
307	1	5	321.926	304.34	368.612	450.892	395.934	465.284	321.98	283.777	300.224	333.171	333.002	344.229	347.374	324.584	392.671	479.254	900.108	584.443	396.108	343.216	345.752	375.705	388.642	396.791	394.566	384.745	595.622	862.717	692.131	1045.64	601.622	468.183	448.872	493.381	484.073	507.411	526.321	457.549	527.902	538.41	533.238	473.61	427.29	385.02	389.771	446.126	442.839
1753	0.15	5	9206.02	8884.64	19537.1	11196.2	5707.71	3550.92	2550.03	2096.36	1741.54	1965.45	1723.84	2352.21	2358.16	7306.25	5881.97	5361.89	2855.69	2688.27	1747.32	1252.11	1034.15	867.672	784.207	1991.08	12672.9	12026	9214.22	5739.85	3682.51	2509.99	2194.01	1968.42	1896.64	1603.48	1506.54	12651.5	8788.04	9936.96	7544.39	11740.1	11666.9	4649.77	2779.69	2144.38	1725.65	1538.84	2183.6
297	0.65	0.05	1149.04	1037.84	1149.04	1111.97	1149.04	1111.97	1149.04	692.532	670.192	692.532	670.192	692.532	692.532	625.512	692.532	670.192	692.532	795.287	1998.05	1228.5	1188.88	1228.5	1188.88	1228.5	1228.5	1109.62	1228.5	832.213	1228.5	1188.88	1228.5	377.108	364.943	377.108	364.943	377.108	377.108	340.613	377.108	364.943	377.108	364.943	377.108	1196.31	1157.72	1196.31	1157.72
1036	0.4	2	429.868	498.697	520.971	462.324	412.94	260.407	248.097	241.525	229.215	233.998	237.648	265.646	252.888	275.617	277.7	249.724	294.724	263.697	228.723	219.413	204.511	236.414	278.766	286.928	462.925	574.879	272.622	231.978	223.994	419.19	428.624	434.998	411.317	412.114	505.602	1254.88	504.969	439.935	480.573	626.024	641.667	471.921	468.673	456.427	433.561	462.703	783.722
989	0.25	2	394.805	859.874	1141.2	1103.71	557.357	414.346	319.076	276.704	238.139	224.098	229.842	341.703	268.536	371.745	384.961	310.055	722.644	2042.34	955.918	649.86	447.632	437.403	996.292	764.71	763.112	1503.95	829.201	602.588	830.873	1290.66	759.023	651.406	574.142	439.452	429.452	1341.46	683.028	827.034	776.218	2793.7	1594.17	737.843	606.82	473.926	395.662	792.111	1339.78
1135	0.45	3	147.913	201.516	175.94	149.606	312.079	260.425	131.176	102.628	286.794	326.65	247.857	460.167	182.873	167.557	445.774	231.171	311.78	344.385	213.774	178.072	148.703	1696.79	561.623	421.873	352.158	567.914	454.847	318.414	1502.68	1234.11	755.246	481.072	359.329	307.339	255.99	302.644	347.624	765.543	612.592	539.992	558.846	412.94	293.172	219.531	176.047	1407.41	667.449
1269	0.2	6	834.883	839.224	595.522	1141.03	873.786	439.527	306.74	239.133	193.33	184.043	173.659	179.152	175.294	193.097	232.921	202.979	218.434	491.926	258.503	190.218	171.909	162.531	182.601	185.651	212.494	353.665	282.534	568.043	450.948	265.783	228.02	189.738	157.532	157.101	243.033	1636.94	842.768	1386.91	928.267	630.709	699.357	494.91	362.251	267.953	212.898	191.157	173.96
1077	0.6	3	207.932	352.677	263.749	286.892	828.682	394.547	247.924	189.942	150.751	138.295	120.633	165.485	113.413	124.061	233.84	157.545	162.916	242.865	144.797	149.875	119.644	453.285	670.133	409.124	370.002	1151.48	470.988	325.178	1384.9	1153.62	520.287	378.931	283.165	230.601	190.337	403.609	336.317	906.135	611.332	686.326	820.455	551.055	360.528	262.377	196.392	1113.86	403.707
1026	0.55	3	218.901	443.604	410.005	280.43	192.684	209.359	133.894	117.562	103.611	103.92	145.511	255.93	166.641	270.899	243.233	163.136	331.433	383.093	181.889	236.652	135.758	246.406	367.247	270.69	628.294	812.322	234.716	156.713	129.006	181.347	130.154	191.013	128.82	107.152	286.865	1625.25	295.483	281.83	224.584	587.869	603.75	200.457	174.72	150.12	130.732	282.108	538.995
740	0.05	0.05	31.1193	28.1077	31.1193	30.1154	29.6938	28.7359	29.6938	29.6938	28.7359	29.6938	28.7359	29.6938	29.6938	26.8202	29.6938	28.7359	27.9708	27.0685	27.9708	27.9708	27.0685	27.9708	27.0685	27.9708	27.9708	25.2639	27.9708	27.0685	34.1054	33.0053	34.1054	34.1054	33.0053	34.1054	33.0053	34.1054	34.1054	30.8049	34.1054	33.0053	34.6118	33.4953	34.6118	34.6118	33.4953	34.6118	33.4953
1294	0.75	7	41.005	39.0832	39.599	42.6786	80.3479	43.4748	38.8982	18.2537	55.6282	69.4931	93.0892	106.726	98.9133	94.3974	263.099	194.425	180.547	519.971	201.308	180.42	160.624	194.428	188.285	165.626	159.435	149.485	150.77	92.3021	110.387	84.0507	81.8811	76.3699	68.9148	68.4191	65.6184	81.8546	101.874	178.446	215.013	109.403	112.1	93.6801	81.3539	72.1283	62.5579	60.8634	56.9498
1848	0.35	5	256.444	145.722	669.606	227.35	79.1065	61.6359	54.6989	49.9018	45.0369	47.9188	260.475	84.4995	96.1607	204.95	184.822	109.422	62.1484	93.158	57.0436	46.5231	41.6557	40.9375	39.8578	78.0042	370.776	216.889	136.723	292.18	67.8069	51.9645	45.3528	43.9333	39.5889	41.1387	176.008	857.048	219.406	250.048	168.713	388.735	384.673	73.8295	59.3785	49.0131	42.8227	42.9411	246.244
1869	0.4	3	511.897	411.387	1428.41	674.857	179.646	133.357	109.085	88.7167	74.8689	80.3202	83.9359	106.307	111.929	207.432	282.935	159.864	95.5595	75.5244	64.161	54.5733	49.7378	49.8061	47.788	49.6259	267.438	324.05	191.596	706.874	162.42	91.9217	71.6009	61.9791	53.8798	53.3765	52.7468	1882.07	615.801	704.878	470.938	760.8	749.477	162.572	136.778	98.1293	79.0158	76.8331	82.6245
1863	0.75	3	212.537	143.42	353.394	129.711	131.281	113.297	109.576	105.453	101.315	108.823	109.822	109.725	106.661	177.865	118.225	111.851	86.9169	83.3037	82.3319	80.8128	77.0739	78.7881	75.5759	107.345	210.412	203.199	119.647	127.761	93.0735	85.048	84.3657	82.1141	77.2277	81.0319	102.975	176.758	130.715	165.58	170.447	134.895	105.715	92.8208	90.6773	87.2414	83.0342	83.767	132.235
1770	1	3	189.676	162.66	245.135	123.437	95.3191	79.8207	77.1626	72.9134	67.6906	67.613	64.7189	71.4024	81.9442	175.873	104.983	114.903	77.716	96.5096	71.0361	66.9136	62.0241	62.1379	63.4582	134.377	221.742	191.072	184.263	89.8877	82.3223	73.5277	71.2896	68.4461	64.6146	64.1292	75.647	212.103	128.145	143.637	102.347	119.906	140.773	86.9499	76.3946	71.4729	65.5542	65.3933	65.0184
965	0.15	6	125.607	107.021	304.591	329.529	146.384	89.4857	40.2333	34.5515	31.8932	34.146	35.0666	40.0062	34.8479	35.8931	54.7145	45.9254	92.3993	29.6183	18.5931	45.4468	34.845	26.955	32.505	75.4554	49.937	168.629	276.392	107.64	395.766	202.787	131.967	80.6725	66.5367	58.8208	49.0572	50.8916	80.1256	125.241	342.17	400.092	178.717	206.439	98.6213	54.4156	43.6593	46.5278	61.015
1247	0.5	3	74.0537	81.8761	74.704	69.8794	100.614	71.6975	55.7755	50.3443	180.957	237.889	164.095	257.211	107.268	89.0612	173.802	111.721	100.688	93.2827	99.7052	97.1452	90.7409	722.214	159.226	153.26	140.663	157.732	156.154	121.648	375.38	285.242	193.988	150.128	129.046	122.065	110.852	118.46	127.617	149.863	150.898	140.002	120.892	127.44	98.6802	90.2467	82.6173	83.2479	81.2635
7313	0.25	3	263.231	290.705	499.581	765.986	863.025	1170.7	270.571	86.4749	218.93	291.996	303.696	317.493	299.287	351.583	523.723	586.112	1359.01	926.009	228.801	40.5171	32.5515	206.678	260.457	355.236	319.28	535.74	1095.17	1646.6	1539.34	1112.9	382.899	151.649	192.549	383.6	342.607	425.491	506.868	441.149	1090.15	899.066	791.751	592.505	326.55	136.619	154.817	334.814	402.153
1287	0.5	3	690.615	705.47	514.656	473.366	530.462	395.189	313.097	250.013	205.365	446.893	251.381	344.177	234.338	220.521	333.543	297.491	354.353	1592.42	545.34	389.089	332.309	1277.39	931.094	624.816	416.417	654.435	511.626	496.876	1245.99	869.669	566.846	450.174	360.846	336.435	357.405	1142.3	624.058	1144.81	1170.85	673.785	804.884	524.8	419.5	344.421	283.871	267.619	234.231
1186	0.9	6	233.019	165.415	94.2216	143.407	112.419	58.3942	45.7655	34.9808	28.0284	29.5925	28.9456	30.9801	29.6662	27.0613	34.4068	33.4698	56.7558	145.174	54.985	42.0707	36.0238	36.236	44.4484	42.9697	43.7675	94.4859	58.7176	47.515	45.6807	37.227	30.3525	24.3902	19.7364	19.9712	21.6023	328.515	56.6608	238.934	155.704	59.1666	54.4954	47.118	37.0491	27.7666	22.2358	21.4206	20.94
1042	0.3	7	43.6053	70.5115	69.1244	47.5855	30.8864	25.876	23.6937	21.49	19.2653	18.7651	18.3771	19.2637	21.2304	32.1359	32.9491	27.386	32.5451	33.908	21.2606	18.6459	16.4179	19.9867	23.5244	21.1416	115.352	142.762	35.9562	25.3875	23.7241	30.3717	20.4296	18.284	16.0789	15.556	50.3918	340.379	38.8199	36.1864	37.7674	97.5664	67.9986	34.3603	29.4044	25.1553	21.616	37.4143	196.688
884	0.05	0.75	2820.37	2530.49	2733.8	2725.06	2820.31	2723.33	2732.43	2153.47	2139.38	2146.62	2075.35	2211.12	2147.24	1933.09	2212.13	2077.07	2147.94	2140.27	2147.09	1925.78	1858.91	1980.16	1858.64	1922.52	1922.5	1791.58	1956.39	1880.82	2013.54	1888.69	1939.3	2313.13	2172.93	2314.9	2172.1	2245.76	2312.21	2020.27	2254.54	2254.74	2265.32	2245.62	2250.21	2394.89	2386.73	2393.63	2385.15
1273	0.85	10	24.3981	30.8858	25.6888	21.6217	55.6858	21.4436	8.75755	5.99507	7.29459	10.5559	13.7466	64.0826	27.0535	27.3982	66.3727	35.9111	28.856	60.7975	26.7701	18.11	12.9924	87.2353	33.9017	35.637	36.7657	56.1462	67.2681	49.4895	170.855	63.7122	54.8856	38.4667	28.5185	24.1873	20.2207	23.2237	35.1067	47.2702	62.4713	44.4361	35.6627	27.386	20.3008	14.7115	11.6453	11.4851	10.8086
961	0.25	10	0	0	0	0	0	0	0	0	0	0	0	0	0	0	0	0	0	0	0	0	0	0	0	0	0	0	0	0	0	0	0	0	0	0	0	0	2.64136	2.83635	4.24427	45.2341	58.202	31.8634	22.462	17.5801	14.644	15.2509	97.415
1144	0.05	1	1316.12	1541.24	1166.46	1057.16	1219.79	877.121	566.784	424.619	396.266	1411.51	879.559	1320.99	838.048	831.645	1029.12	806.867	901.681	1958.52	987.979	742.855	613.94	2062.56	1894.44	1291.85	1016.12	2396.59	1494.57	999.296	2368.95	3002.88	1608.91	1087.32	862.224	844.604	869.198	4190.49	1639.86	2005.14	1817.53	1348.63	1799.53	1186.6	1093.25	827.933	726.539	689.691	674.755
616	0.85	4	1750.49	4013.38	3881.45	2162.51	3413.14	4822.62	2085.71	1737.26	1682.57	1740.99	1686.45	1693.16	1744.5	1576	1745.26	1636.53	1690.62	1631.16	1685.56	1593.27	1579.04	1633.18	1582.29	1636.24	1637.18	1479.04	1589.95	1583.35	1586	1482.93	1581.17	1380.38	1260.09	1344.26	1302.33	1346.84	1346.99	1216.84	1308.33	1303.25	1266.42	1259.27	1262.21	1333.89	1289.23	1295.58	1293.14
911	0.05	2	579.005	485.113	622.633	651.107	396.92	404.041	257.074	207.702	204.368	179.796	154.585	163.548	144.129	177.247	166.031	165.161	132.093	118.234	152.358	123.059	106.066	100.168	117.367	180.843	125.884	703.08	1232.6	931.806	1268.14	796.802	675.09	481.453	417.842	436.631	624.702	1135.93	683.785	1393.68	2038.77	2376.76	1374.98	1008.11	1028.01	654.926	488.574	478.278	1049.95
1006	0.65	8	27.6883	78.7545	72.9471	44.7644	29.8405	22.7256	19.2245	16.2863	13.7176	14.6593	14.1982	22.7369	17.5791	40.8284	29.5771	21.7774	57.146	111.769	35.9948	28.3346	21.3922	65.9205	69.5184	51.5588	113.36	88.8251	40.8384	30.067	28.1939	50.9667	22.3942	70.8778	23.0168	18.4564	42.1013	177.43	33.9527	37.4044	33.4709	165.526	91.1742	33.7082	27.4779	21.9564	17.7486	137.601	141.985
1048	0.55	1	422.227	803.49	912.729	1583.22	1390.59	1128.3	619.436	508.084	425.744	408.139	372.449	373.796	356.775	318.354	360.287	325.364	284.539	308.588	214.382	198.905	179.967	186.529	453.427	388.097	338.834	888.356	542.189	404.127	1089.26	1311.77	661.132	513.127	411.181	363.586	313.791	356.851	318.877	518.405	774.426	1114.9	900.963	901.297	656.663	542.444	463.08	677.343	540.655
1123	0.9	6	59.2717	73.3874	41.7217	38.2649	46.6186	27.8548	24.0246	20.7164	73.5405	49.3445	29.5576	61.1586	33.7803	53.46	46.3995	31.0551	55.7407	87.9835	36.5639	27.5315	22.4712	22.5115	33.1663	23.2837	95.6945	82.4265	52.2141	38.8917	150.206	65.6668	37.9234	30.6488	24.6961	21.836	22.1887	207.546	34.8188	59.3268	79.436	41.6762	148.15	36.4423	35.2204	26.0748	21.5521	19.6314	19.7138
1032	0.45	2	156.791	274.33	383.358	309.683	215.734	148.249	114.638	96.3845	80.5704	73.8267	63.2335	62.9043	55.7408	57.1153	83.3596	71.1495	119.327	154.451	91.1483	76.3247	60.4687	65.3525	254.246	158.825	202.147	280.365	188.334	127.52	485.145	539.038	219.436	174.046	134.013	114.779	96.213	230.356	208.59	378.504	335.84	608.343	453.623	265.447	202.32	157.688	127.949	277.187	202.049
1774	0.85	2	682.3	568.778	955.903	480.358	329.083	216.434	194.932	164.104	140.108	130.821	117.863	115.442	117.558	322.413	348.054	401.346	255.76	324.239	164.791	133.276	111.187	98.9608	87.4468	121.856	551.529	1017.9	811.611	314.533	224.621	202.29	165.614	154.325	204.93	144.241	247.968	548.913	456.863	690.652	518.771	612.912	509.318	268.001	204.857	172.128	141.732	132.58	118.503
1781	1	0.8	845.378	647.458	1570.95	862.835	459.718	272.387	223.321	174.503	146.088	138.867	132.475	160.391	196.387	824.134	610.331	603.041	256.847	297.003	165.165	129.327	110.018	100.947	90.9518	130.404	862.666	1357.97	1057.38	477.386	336.175	262.411	195.485	219.129	146.65	135.094	241.517	862.503	631.773	1302.25	1280.58	1388.46	600.282	330.882	244.123	192.336	160.234	149.985	203.453
355	0.3	4	157.818	133.042	191.352	591.768	715.398	215.144	31.951	10.8353	7.98837	35.3902	189.801	203.822	156.395	168.551	243.646	503.055	1100.89	245.42	37.2184	14.0201	11.9966	10.8448	56.279	163.329	137.829	150.269	208.396	386.613	591.084	338.318	34.5502	11.9941	9.98147	36.3985	216.429	247.153	278.217	299.912	356.725	829.709	1462.55	536.052	82.0308	26.9569	121.295	192.574	221.417
1101	0.95	2	184.623	120.625	466.71	200.399	101.839	71.7338	58.267	50.516	44.8101	46.7353	111.855	108.984	93.2829	147.341	143.444	109.33	79.3756	82.1563	64.2543	50.2857	44.1593	43.05	41.7052	47.2913	120.629	197.099	115.283	179.404	92.6861	60.0386	48.795	43.7319	39.1886	40.3402	49.2784	678.688	215.307	176.171	116.197	273.791	329.39	94.089	69.8729	56.1178	48.6261	48.808	85.8224
1023	0.05	2	301.093	513.015	720.135	1074.69	1007.22	815.109	336.247	263.907	222.124	210.984	183.214	181.163	178.935	156.552	170.647	160.304	187.119	180.798	141.027	109.209	58.7506	27.1646	124.202	92.0463	85.1187	179.582	140.852	106.305	126.013	187.779	124.05	96.9308	62.8015	38.8165	22.4788	23.9318	38.8367	88.4456	213.752	909.463	420.744	335.51	291.685	243.831	193.87	191.539	181.499
1060	0.55	5	39.9936	71.9871	107.056	42.4026	32.9292	26.8983	22.378	18.8104	16.0176	15.1794	16.654	69.6594	23.82	60.2204	66.0605	36.0788	76.2859	67.8363	31.2826	42.6072	24.5185	50.1994	97.5277	62.2211	149.753	119.714	41.7157	28.1335	25.4689	67.904	27.2847	22.5039	18.2127	16.3574	95.7674	317.534	78.0243	70.186	41.3368	87.7727	140.609	39.3857	30.2114	25.0713	20.6842	21.7147	98.683
1864	0.25	5	271.764	175.107	797.262	282.547	113.932	61.8366	41.032	27.2394	20.7876	35.491	68.6417	114.046	83.7	130.201	133.542	97.4158	57.4838	44.5452	31.15	20.9972	16.7854	15.2539	14.2753	19.9623	178.809	196.513	129.653	322.627	102.095	56.365	37.6729	59.423	63.0074	92.725	138.604	1118.47	270.491	351.729	235.967	512.861	447.969	101.92	61.5464	36.7641	25.9278	24.7597	132.045
1797	0.6	2	3580.44	2853.03	5421.81	2825.21	1805.18	1274.87	1142.51	1016.43	917.205	902.779	879.644	992.317	1099.86	2924.21	2077.4	2342.87	1066.02	1210.3	610.113	497.966	426.14	394.705	369.096	787.952	3235.84	4068.14	3374.89	1403.52	1294.38	1194.95	1096.33	1092.71	997.164	966.904	1236.79	3499.52	2309.62	3610	2972.77	3468.9	2367.17	1394.42	1076.15	938.757	824.692	798.355	863.561
305	0.25	0.25	1671.01	1273.39	1765.42	2187.93	3667.75	3425.71	1992.89	1120.65	1375.47	1395.04	1691.22	2199.81	1765.88	1997.38	1692.82	2106.89	2689.76	3017.58	1936.88	1391.24	1229.45	1551.97	1626.48	2113.21	1463.58	2904.06	3049.48	2979.92	3005.34	2696.51	2010.06	1040.81	1142.5	1806.09	1635.35	1814.23	2222.3	1735.12	1997.25	1669.29	1848.86	1656.66	2459.88	1705.57	1705.1	1370.28	1915.66
968	0.05	7	44.0208	49.9913	153.878	476.772	223.618	116.338	70.4466	67.7624	66.8267	71.073	67.8488	65.1858	62.0127	55.0474	62.2065	59.1899	141.002	65.9765	52.1662	61.0933	54.9969	58.8261	58.232	58.7416	56.6934	61.2395	83.3956	65.2666	125.685	105.737	72.6731	52.1728	42.3482	39.2129	36.1937	34.3266	36.4442	42.6728	105.779	140.091	91.653	160.204	78.2444	58.6774	60.6776	68.5943	72.8954
1019	0.7	7	17.6182	39.5618	56.7285	27.597	16.4682	13.6337	12.6643	11.8057	10.9562	11.0829	10.6386	11.0457	11.0337	20.1576	21.3402	16.6325	40.9119	35.4289	16.6574	15.4283	12.5891	11.9121	11.0642	11.0427	47.4467	89.6635	40.6628	21.7716	15.8344	13.4834	12.5663	11.674	11.1836	11.4128	11.6042	185.652	27.764	26.1739	32.2563	103.694	49.4368	16.5826	14.4964	13.0767	11.9595	12.2051	34.3319
1302	0.8	10	17.0858	14.2497	14.9495	10.5774	14.2242	4.66984	4.03239	8.2604	24.9048	34.0102	40.5872	36.2204	37.7755	32.2632	72.7701	43.9011	35.4376	257.672	29.0267	21.4096	20.2422	26.3395	23.5719	20.4533	17.2573	17.466	15.0332	11.5725	17.6391	6.25689	8.44067	9.20635	9.26547	10.1646	14.3847	17.7849	23.8855	40.8387	57.3734	17.5547	15.3293	12.649	12.5211	11.5314	11.5185	13.646	14.3381
1824	1	10	8260.18	6970.11	17646.5	7962.56	4842.39	2816.58	2198.36	1834.02	1572.42	1828.09	1783.72	1888.85	2157.4	6770.73	4625.29	4737.24	2264.35	2121.8	1337.65	1078.48	841.578	727.634	654.503	1903.08	11454.2	9836.96	7433.92	4571.96	2887.32	2193.08	1922	1799.63	1569.9	1442.99	1499.17	11138.8	6204.16	8416.22	6695.51	9924.66	8178.77	3402.71	2285.97	1815.89	1485.03	1339.46	2115.33
1316	1	0.05	0	0	0	0	0	0	0	0	0	0	0	0	0.111258	0.100491	0.111258	0.107669	0.854172	1.07669	1.11258	1.11258	1.07669	1.11258	1.07669	1.11258	2.36451	2.13569	2.36451	2.28823	2.36451	2.28823	2.36451	2.36451	2.28823	2.36451	2.28823	2.36451	1.47981	1.33661	1.47981	1.43208	1.47981	1.43208	1.47981	1.00723	0.143208	0.147981	0.143208
1835	1	0.55	7200.53	6058.36	14659.6	6425.03	4029.12	2424.84	1944.76	1647.9	1471.25	1537.76	1397.07	1582.62	1813.53	5931.01	3982.31	4177.61	1927.28	1921.02	1130.1	915.181	733.103	643.907	595.092	1824.56	9089.61	8857.35	6461.13	3539.93	2440.1	1930.91	1712.32	1631.86	1440.43	1334.85	1468.01	8584.64	4981.74	7010.75	5501.35	7471.22	6100.99	2849.46	1943.37	1570.67	1305.19	1192.91	1990.64
1847	0.9	2	5972.15	5009.09	11562.6	5297.56	3062.65	2007.93	1625.62	1385.32	1206.45	1159.62	1159.95	1363.65	1477.31	4939.03	3329.22	3614.34	1656.39	1735.88	963.248	751.794	613.814	547.193	497.841	1352.31	6776.63	7665.93	5613.55	2632.99	1988.6	1615.45	1435.26	1383.51	1228.56	1154.98	1347.44	6658.99	3918.14	5787.72	4474.67	5839.72	4268.52	2361.35	1623	1336.03	1122.65	1038.8	1346.08
1231	0.95	10	137.55	92.947	63.2017	54.2236	49.3946	35.02	24.8536	18.0906	13.532	13.5782	12.9712	14.1186	13.6059	12.3508	15.0546	15.7173	40.863	277.074	59.8435	36.2905	27.9071	39.9739	82.6636	58.5798	50.2035	61.7745	55.2376	43.4792	48.3584	39.6895	32.8169	23.2906	16.7301	15.6111	21.056	283.734	72.3863	159.108	90.8571	67.5441	54.7379	48.7551	38.3143	28.3372	21.6613	18.8451	17.2922
1140	0.8	0.05	4.29847	3.88249	4.29847	4.15981	4.29847	4.15981	4.08476	4.08476	3.95299	4.08476	3.95299	4.08476	4.08476	3.68946	4.08476	3.95299	4.08476	3.95299	3.88407	3.88407	3.75878	3.88407	3.75878	3.88407	3.88407	3.50819	3.88407	3.75878	3.88407	3.75878	3.7274	3.7274	3.60716	3.7274	3.60716	3.7274	3.7274	3.36668	3.7274	3.60716	3.7274	3.60716	3.62175	3.62175	3.50492	3.62175	3.50492
1296	0.65	10	35.5032	22.1489	18.6879	15.6293	19.9918	13.5191	11.5993	10.573	9.61159	9.26492	8.44401	8.87406	9.32382	12.137	12.5227	10.3733	9.87191	50.7153	14.0118	11.5406	10.0401	22.5817	31.8547	14.4396	14.1399	13.0432	14.1602	14.2918	37.408	13.9449	11.7528	10.2757	9.36923	9.11241	9.67038	37.882	28.4108	51.3672	52.5226	23.4932	53.244	16.4184	13.745	11.7648	10.0783	9.77037	8.80494
1659	0.9	4	21.093	34.3932	53.5954	31.8079	25.8628	21.8128	20.2215	19.1816	17.3125	17.0344	16.3242	17.1551	19.7013	37.331	22.3589	32.3539	46.6058	24.4743	22.1683	29.9508	33.9799	22.6472	20.4696	22.252	45.8914	66.2582	96.2584	37.2603	28.2895	27.175	24.9225	22.691	20.4463	20.1854	27.0257	61.4049	31.6134	31.0135	51.2732	42.222	46.9689	37.279	28.3702	25.4763	22.6084	33.6274	60.8929
1277	0.05	10	1.10526	1.05101	1.11612	1.08258	1.55509	1.08839	27.8518	13.2914	2.69467	2.78259	2.69792	10.2712	6.92217	9.12939	17.7967	14.1665	7.69115	24.8346	24.6976	6.04443	4.5281	3.88853	2.37867	2.45626	2.45657	2.95152	3.89223	4.56196	11.2189	4.52892	0.925287	1.10209	1.05277	1.07724	1.03885	1.13212	1.23797	1.25062	1.56655	1.21124	1.22784	1.12957	30.0674	27.4289	2.90585	3.0016	2.90388
1021	0.05	7	119.334	210.236	216.354	167.733	104.296	72.7206	54.9702	40.4459	22.8535	17.8142	11.7497	11.9933	7.01761	5.40066	8.06147	2.67686	11.5382	11.5405	6.00431	3.9159	5.81989	12.1019	126.656	63.7911	58.3091	206.569	88.159	57.6629	189.202	138.258	90.1863	59.3224	42.389	33.8419	23.982	17.4815	13.3055	60.9438	378.905	259.999	127.16	116.564	70.57	50.6931	37.1626	34.4979	39.367
1280	0.25	7	22.8627	22.5758	22.7452	18.9228	35.308	7.7544	1.43558	1.85631	455.542	239.488	97.0079	164.385	142.929	101.586	166.962	100.079	83.0525	64.0614	45.1222	32.7824	36.704	143.462	60.0036	52.6554	49.3245	51.7182	46.6447	39.9618	52.482	48.8146	37.5199	27.8668	27.4688	28.9354	29.3143	30.2696	35.2287	48.0401	52.9935	35.2177	28.871	29.3761	17.2988	13.6304	12.8743	18.8468	19.3154
1120	0.95	10	8.08411	7.39029	8.45378	8.1916	8.44742	8.17282	7.60461	7.13788	6.5616	6.61466	6.29101	6.45807	6.35031	5.64299	6.18809	5.89909	6.03963	5.8168	5.46086	5.41268	5.21206	5.40195	5.30115	5.56562	5.6418	5.32484	6.35049	6.58639	22.4658	17.9084	14.2344	11.5402	9.69778	8.92341	8.27111	8.20535	7.79711	7.20627	9.17477	8.8789	8.81756	8.21855	7.89873	7.23754	6.54575	34.6869	13.2058
182	1	0.9	198.434	508.733	223.408	125.934	108.186	99.9252	101.973	100.638	96.4918	99.1903	95.6753	98.9616	99.9363	108.821	124.664	108.327	54.1932	49.7538	49.9785	48.6899	46.3414	47.6518	76.6248	119.207	83.6971	452.564	408.012	488.086	160.075	111.897	106.542	102.974	98.9826	102.135	148.886	406.889	392.596	510.235	695.356	290.288	149.96	113.012	106.915	104.618	100.498	103.167	255.667
7311	0.95	8	16.2299	36.3767	58.4737	27.202	18.7137	16.0461	13.9435	11.909	9.8834	8.99872	7.85004	7.56972	6.94356	5.90073	6.66888	6.49314	7.18876	16.9458	16.5546	13.902	11.2345	10.1246	27.0619	16.7939	25.8976	33.2715	26.1475	17.0334	69.7087	58.9567	24.8516	20.0918	16.4973	15.1092	12.79	13.5965	18.5313	53.9535	40.6683	84.0875	35.574	25.4343	18.3319	16.0513	13.5614	12.3826	12.6898
1755	0.35	2	72.8208	88.8994	138.754	57.6939	44.0086	33.7507	30.8296	26.9595	23.5856	22.5221	22.4756	29.1052	33.4466	123.275	56.5508	59.3724	40.5927	125.003	31.7007	26.8095	23.0944	21.9109	30.3024	83.5275	162.276	119.093	59.2569	61.8163	57.7803	44.1766	39.9825	39.4799	82.5652	35.7426	35.6735	123.883	82.0837	91.7179	54.6134	130.27	249.501	69.4907	48.0729	41.465	35.6764	35.7226	125.93
1152	1	0.05	0	0	0	0	0	0	0	0	0	0	0	0	0	0	0	0	0	0	0	0	0	0	0	0	0	0	0	0	0	0	0	0	0	0	0	0	0	0	0	0	0	0	0	0	0	0	0
1192	0.6	3	250.407	316.603	242.566	258.309	264.377	192.14	147.647	124.522	110.727	113.069	110.336	117.767	118.054	112.628	130.535	124.129	116.41	226.982	153.424	107.687	92.1261	93.3398	105.448	110.927	123.372	176.583	163.34	129.545	118.673	94.6173	82.8976	73.5447	65.7861	67.0861	70.7668	395.831	217.137	351.828	240.472	182.049	160.157	135.498	116.773	98.1227	85.292	84.5165	81.5502
541	0.05	2	31.7883	27.5858	24.9633	48.3665	1274.67	454.049	117.449	66.4982	48.8772	45.1747	39.7231	34.5213	25.9916	20.4137	19.8019	272.574	379.54	68.7389	35.9436	21.5356	17.5694	19.8952	18.4303	16.6222	16.6885	13.2102	13.4265	91.9509	928.441	235.363	116.236	105.863	52.3728	40.7962	32.9087	28.798	22.6703	18.8429	17.036	32.8204	917.079	374.874	79.3279	58.0222	39.0978	38.4349	34.8043
1822	0.7	0.8	5010.18	4047.7	8819.52	4294.64	2517.03	1703.11	1422.87	1232.39	1081.56	1048.18	1017.49	1223.84	1327.9	4250.22	2758.79	3099.34	1416.31	1546.31	823.435	651.978	542.308	490.743	453.523	1155.51	5320.47	6304.75	4813.66	2054.38	1683.48	1434.27	1289.99	1266.74	1143.21	1087.02	1380.23	5619.31	3275.27	4809.77	3844.42	4865.32	3281.47	1948.29	1388.49	1167.44	998.952	940.336	1149.26
972	0.05	8	104.173	191.13	587.688	410.216	151.627	108.496	81.0862	57.3921	36.9589	26.3071	20.004	17.6008	15.0588	12.055	12.8057	12.4927	79.0143	48.5801	34.9989	24.0038	14.5565	9.5366	8.94251	11.1663	9.37064	29.8576	57.2222	42.3525	39.8544	41.4399	37.2938	23.9147	13.3047	9.23821	6.02437	5.34663	5.51332	22.2405	77.2836	293.175	77.7263	58.9855	48.368	32.5736	14.6351	9.35914	6.78835
613	1	3	116.395	248.869	312.179	716.722	1460.39	856.251	99.1265	48.4243	41.368	96.0963	135.858	129.132	108.037	90.995	186.786	368.982	310.142	101.302	22.1617	16.5195	15.1419	17.9137	26.2019	25.7626	37.584	69.3005	281.154	334.655	655.258	235.318	26.1252	17.2411	16.3523	16.3547	56.2787	74.9805	71.2517	106.204	404.613	487.604	663.806	528.554	52.2005	29.4497	18.8183	33.6102	80.3047
1086	0.8	1	0.821058	0.741601	0.821058	0.676966	0.699531	0.676966	0.699531	0.699531	0.676966	0.699531	0.676966	0.699531	0.699531	0.631835	0.699531	0.565521	0.584372	0.565521	0.584372	0.584372	0.565521	0.584372	0.565521	0.584372	0.584372	0.52782	0.584372	0.461282	0.476658	0.461282	0.476658	0.476658	0.461282	0.476658	0.461282	0.476658	0.476658	0.43053	0.476658	0.383702	0.396493	0.383702	0.396493	0.396493	0.383702	0.396493	0.383702
1295	0.2	10	68.3358	67.8563	42.3124	30.8943	34.4726	20.2571	14.9401	10.7128	9.09777	8.87836	10.6767	15.1414	24.1652	29.7248	19.9841	14.8555	24.9237	73.752	30.5702	17.8195	15.5215	18.4144	93.2194	27.9578	36.2488	29.5995	36.3303	75.6595	82.2874	31.4391	23.8261	17.5625	12.6459	14.5322	119.239	132.388	68.1535	135.313	115.382	33.5759	101.814	27.3429	23.5317	21.0993	19.6517	15.6063	14.0313
1139	1	10	5.32402	8.25365	5.88262	5.02547	5.497	4.352	3.92298	3.71032	29.945	10.1003	18.9145	24.9637	8.20788	19.6733	23.8096	11.2506	10.5053	11.7106	7.53914	6.43537	5.55767	76.4288	13.0218	10.2678	12.9958	14.0333	14.3109	9.6418	61.0254	47.9053	17.1156	13.4283	10.6364	9.18605	7.91324	14.3154	17.8456	16.6941	14.6898	12.7144	9.8098	8.70049	6.95611	6.04372	5.2146	11.2269	11.8297
1862	0.8	0.85	762.857	483.918	1738.03	425.176	308.029	161.184	127.341	101.859	84.5728	124.343	151.931	136.423	128.871	776.337	251.921	269.291	110.452	167.904	83.0693	68.3886	54.3053	47.7621	40.1025	90.802	950.853	1151.43	371.625	431.981	157.96	120.503	96.8971	96.2296	68.8601	88.413	203.621	943.642	394.026	738.722	607.378	627.588	271.295	159.829	119.549	95.7037	84.15	75.5108	452.381
629	0.05	0.35	2058.14	4384.01	3857.67	2146.42	3301.01	4755.61	2145.94	1768.06	1711.02	1769.88	1710.91	1769.27	1768.42	1591.35	1793.39	1642.25	1694.19	1577.13	1742.27	1622.33	1562.73	1662.27	1562.62	1621.76	1695.08	1487.4	1627.97	1504.99	1550.43	1492.41	1595.37	1474.92	1323.03	1328.63	1324.98	1538.08	1385.78	1314.85	1532.45	1286.74	1274.57	1262.72	1308.72	1607.95	1357.92	1482.39	1308.44
1000	0.65	3	20.7452	68.9433	51.2852	38.6326	24.0086	18.6529	16.2438	14.102	12.1211	16.097	22.177	37.0443	21.0997	48.6361	26.1608	18.2909	81.1531	95.1819	29.1808	22.1912	17.6789	22.7448	53.5391	47.9554	71.2724	72.2544	34.352	24.6885	24.4804	41.0277	20.046	23.3054	17.8627	14.9394	26.7586	150.334	29.7759	24.1055	23.2456	142.424	44.7342	24.7612	20.8457	17.8179	15.1338	85.5202	91.7239
7306	1	10	7462.7	6263.31	15238.6	6851.22	4269.77	2540.24	2012.21	1697.31	1468.97	1602.47	1441.25	1656.11	1896.46	6051.61	4121.98	4321.16	2021.7	1964.69	1182.21	973.246	762.026	663.71	606.155	1862.52	9595.75	9052.13	6787.48	3709.18	2563.91	1996.51	1766.47	1677.73	1475.46	1363.6	1436.22	8950.78	5290.74	7300.36	5788.34	8007.59	6595.59	3010.9	2031.39	1632.1	1349.47	1226.96	1958.88
991	0.25	3	77.5673	145.592	188.687	126.437	75.852	54.5382	39.5193	30.2305	22.5753	19.29	15.6676	22.9671	15.0418	15.7339	26.344	18.5784	49.3584	55.8361	43.0849	51.8503	36.2469	38.8185	149.963	108.155	82.2677	132.831	98.3738	62.7943	94.1147	171.405	75.6275	55.2713	40.9286	33.1094	25.8014	22.1759	20.0088	51.109	80.7545	336.378	117.533	95.9608	67.6152	47.7524	35.2749	31.4341	56.5861
7317	0.95	4	145.321	141.651	373.267	67.4166	66.3566	36.1762	32.3965	26.1295	20.8853	18.3521	15.4088	16.198	21.828	111.124	56.8311	49.5879	33.6172	27.9963	23.3115	18.8286	15.2903	13.2539	12.49	47.4348	330.223	156.832	91.0947	63.1183	39.2563	31.3677	26.6779	24.8416	23.2686	20.034	32.0763	257.867	89.1823	155.929	63.1706	222.416	238.201	48.9638	38.2436	31.7764	25.6019	22.4397	116.736
998	0.55	0.85	174.651	152.698	155.474	274.482	641.593	385.194	167.554	163.587	160.345	163.21	153.134	153.981	150.029	132.837	159.013	143.913	142.273	120.943	6.11479	1.1298	1.09509	16.6523	25.7863	24.3653	23.6137	22.6245	29.4735	22.2102	16.9359	18.5912	41.1028	42.7859	43.081	44.3363	42.662	42.5609	39.3708	29.0473	60.8125	108.981	67.4822	58.2906	140.31	141.873	137.077	142.905	135.687
1716	0.55	4	71.1141	99.7137	199.405	76.2392	45.9197	32.2476	28.0227	21.3635	16.8027	15.4928	15.662	36.1633	29.1456	123.284	40.1826	35.1525	207.313	71.1437	36.9332	30.4719	24.192	20.5278	18.5722	56.2614	262.341	291.755	107.532	65.5447	44.9551	44.2511	31.8875	23.5468	20.3652	19.3701	19.263	559.107	91.8215	94.8526	107.535	281.466	312.491	102.442	42.9159	35.4556	29.373	173.667	299.929
1896	0.05	3	585.429	485.203	1134.77	526.666	409.709	293.055	252.024	221.86	215.169	256.062	218.777	207.767	182.805	645.249	356.418	289.713	214.059	204.405	174.515	177.915	141.449	137.169	120.84	166.622	509	713.333	399.226	500.078	286.913	249.297	229.588	218.266	163.798	197.624	164.567	558.094	444.786	484.925	590.847	461.446	317.724	248.842	217.236	199.914	242.532	171.971	271.155
1883	0.05	7	281.622	206.735	486.139	117.653	81.7688	53.9491	41.5049	31.7813	25.2357	23.6185	28.6977	38.5637	36.2529	301.265	82.0726	50.8218	33.1731	25.0998	20.3067	16.8106	12.483	11.0279	8.6945	37.0013	325.038	317.493	122.193	123.352	61.895	44.9884	34.4312	27.3622	19.7992	17.7586	16.5725	125.01	195.367	274.145	274.824	255.694	77.3226	54.5915	41.7695	32.583	26.4794	20.1108	53.547
1285	0.6	9	6.36555	6.53088	7.79426	10.3651	37.5434	8.68759	7.95577	6.99808	6.05233	5.78549	5.65327	17.3888	11.2434	14.495	19.0567	11.4086	10.8048	103.548	11.7504	9.36343	8.48115	8.60177	8.91972	8.09285	7.37253	6.80605	7.14284	6.86595	17.256	8.34109	7.61087	6.65628	5.72737	5.36556	4.87527	6.58458	14.7547	40.9728	33.0978	11.4838	14.9911	9.36405	8.35282	7.48047	6.39667	5.92744	5.20974
1266	0.05	10	13.6401	22.7134	17.2406	16.2472	24.4559	14.4994	9.87644	8.68388	7.3914	7.09546	6.23504	4.68672	4.26137	4.09663	5.70254	5.17791	6.94916	9.4292	9.44384	7.21127	8.84064	8.20618	8.40654	6.92031	7.39355	7.57809	9.05009	10.0309	16.1008	11.013	9.43532	6.52125	5.5451	5.80201	6.60893	33.2942	21.3866	75.652	43.8154	21.4953	44.7131	17.7354	15.2569	13.9931	12.0988	11.0221	9.51476
1176	0.05	9	4.77391	4.9954	4.65356	4.79106	12.6289	23.1238	36.7768	31.5138	260.561	56.0232	185.686	123.963	24.0554	22.6928	52.0594	26.949	25.8831	32.0785	38.1186	27.6016	16.9827	54.2511	16.3136	15.7596	17.3163	23.0591	19.2618	12.6387	134.164	152.058	69.1562	55.6363	36.1545	22.8005	14.6076	12.7531	38.7029	79.7349	29.8031	20.1369	22.3523	34.9282	39.6563	31.7504	14.4336	125.043	54.8022
924	0.25	3	15.371	22.8336	42.2306	28.0285	18.3392	29.6881	17.1285	16.2416	25.2329	21.6884	19.2267	49.9536	24.9387	46.8816	25.7496	29.4233	22.5042	25.1362	94.3063	22.5459	17.9121	16.6532	21.7721	19.2997	16.0167	87.7341	88.1689	42.22	59.2847	51.0795	68.6338	36.7239	35.4852	35.0421	48.4142	68.1863	42.3969	61.5356	58.5796	82.4536	37.5703	30.3942	27.3749	25.0568	23.3329	23.8599	91.5792
758	0.05	4	90.5058	81.5884	88.8808	82.5052	79.2261	64.0287	63.5128	62.685	61.8693	64.6749	63.8924	67.2184	67.6284	61.2068	67.1502	64.9551	66.1723	40.4415	41.7152	41.2485	41.1197	49.0784	50.5905	54.4371	56.7372	51.2518	56.182	55.0356	55.4994	73.7971	75.6966	73.3927	68.9701	77.2799	79.2947	82.8112	83.8432	74.1119	80.0885	74.1869	71.0554	60.8389	62.5616	59.4699	56.7873	61.1943	61.6485
1257	0.05	10	0	0	0	0	0	0	0	0	0	0	0	0	0	0	0	0	0	0	0	0	0	0	0	0	0	0	0	0	0	0	0	0	0	0	0	0	0	0	0	0	0	0	0	0	0	0	0
895	1	0.5	2936.57	2668.59	3018.87	3132.01	3058.74	2892.26	2885.39	2411.45	2215.89	2296.21	2226.73	2300.29	2296.51	2072.07	2289.92	2217.6	2280.56	2187.05	2253.02	2039.79	1924.5	1993.15	1931.75	2000.75	2001.38	1936.19	2098.65	2192.05	2274.77	2342.24	2233.45	2365.92	2331.75	2460.65	2429.74	2476.73	2525.92	2288.25	2735.32	3245.38	3450.82	2892.33	2822.9	2792.36	2643.07	2690.2	2578.26
1317	1	5	3.0352	3.06129	3.45576	3.79252	56.9326	12.8257	4.01894	216.644	25.7989	20.502	13.1056	25.7751	11.8251	7.99784	7.07101	6.2135	17.7555	77.4518	31.1535	18.4852	17.8177	45.2664	22.1071	12.5924	12.3929	11.0596	14.2491	10.5073	10.4902	9.23213	8.85812	7.28631	6.37443	6.95946	6.60135	7.29489	4.53349	3.45206	3.491	3.01671	2.31968	2.17118	5.75247	3.75742	2.85232	3.73856	5.18985
1242	0.1	10	10.7426	9.82119	9.81338	5.62454	5.15143	3.72098	0.451029	0.424122	344.742	192.244	49.733	53.5463	51.6649	42.2475	40.3618	35.0856	19.946	7.70005	4.55149	17.794	49.0141	15.0461	13.2956	12.8236	14.9568	10.3501	7.56751	1.98295	0.84949	0.326874	0.300414	0.272185	0.250507	0.243518	0.249694	6.2512	165.1	108.869	27.0852	37.7161	5.08603	1.24977	0.274779	0.236239	0.213755	3.84874	17.5505
107	0.85	3	202.104	87.5676	109.701	57.926	30.1683	20.9979	17.0806	13.8671	11.0323	9.41269	8.87091	67.2716	67.1005	96.0631	67.0653	32.9192	23.4491	16.2971	13.3778	11.1033	9.01711	7.92757	57.57	371.928	186.246	221.381	129.19	83.9537	38.5194	28.3971	22.8494	18.0667	13.9868	11.6433	16.0993	210.847	139.33	266.197	202.646	61.8888	49.8037	28.8589	23.1499	18.273	14.1659	11.8052	41.292
1841	1	10	161.398	170.579	470.759	135.148	72.7935	38.6446	29.4067	21.6171	16.8302	12.9621	14.3455	13.8557	16.7307	162.541	74.0067	72.7117	22.9005	28.3451	13.8148	10.7683	7.72473	6.24459	5.8175	42.9194	288.638	304.727	97.7534	69.7376	34.5768	23.8506	18.1395	15.1437	9.94403	8.43895	42.6338	246.133	86.2045	132.574	92.5246	126.172	101.697	45.366	29.62	21.3664	15.9721	12.0495	33.3557
907	0.05	3	267.389	216.4	292.964	239.818	154.199	127.356	83.5304	69.9899	93.4019	86.0402	75.3026	71.0491	62.855	78.5809	84.9097	108.442	79.4877	64.5343	67.1778	68.5752	66.6486	68.0224	74.0437	67.5627	64.66	145.538	526.783	370.539	409.585	368.778	261.302	176.111	137.877	126.723	207.296	392.263	273.676	445.464	647.032	864.445	538.328	302.621	280.324	180.282	140.948	216.61	447.964
80	0.95	0.25	244.989	225.302	327.802	226.965	191.368	184.28	185.326	136.71	23.6608	18.5572	157.682	220.168	190.413	192.336	199.014	193.252	153.626	151.49	145.723	144.757	141.338	100.877	117.447	193.782	325.202	559.628	352.711	343.522	202.032	193.22	195.78	166.627	48.8311	107.009	173.305	227.41	273.432	522.984	464.817	233.257	181.009	172.179	176.802	171.758	155.83	22.4197	181.447
1236	0.05	7	2.30197	2.21689	2.33263	1.97739	3.29602	2.70207	2.36013	1.3489	1.58308	1.0215	1.27851	5.11215	5.84805	5.00534	8.88961	9.06476	7.21479	7.43043	3.26125	2.61941	2.05603	16.2101	5.79421	5.57048	4.99108	4.95085	5.83537	5.31114	5.49508	9.54438	27.3977	26.4549	20.1961	7.449	5.80576	5.11142	5.08201	5.65873	8.25724	9.25319	9.24604	8.23669	2.98948	2.52991	1.89462	1.61425	1.34932
981	0.05	4	125.465	137.067	293.299	472.222	172.003	123.754	117.401	114.942	108.011	109.988	105.293	108.083	107.401	96.6291	106.787	103.079	110.118	85.0043	22.4056	15.2552	13.2371	12.3517	13.2145	15.0088	16.2641	31.9345	33.5511	20.0444	23.1573	22.5577	41.2813	39.4117	35.4456	35.8172	33.9862	34.7592	34.8555	47.1776	57.5455	83.0857	53.1367	45.5346	68.4347	66.4522	64.407	63.8038	62.4695
1093	0.05	4	19.1419	27.5472	35.3195	29.6684	36.6232	27.9844	16.3692	9.83368	7.85989	13.8745	14.7938	26.0921	24.5912	48.2023	46.5349	37.3645	63.5112	89.0441	40.9475	32.3186	21.6046	22.2729	23.1905	24.1524	157.6	107.609	78.7238	37.6444	86.4122	83.1718	42.5689	33.3985	23.5591	18.7001	17.9937	163.225	52.6442	61.4119	61.932	51.0981	200.532	41.3537	35.2398	22.8472	15.5726	14.3256	13.9383
1709	1	0.8	81.0063	67.6227	101.252	76.6742	61.4372	54.037	54.7429	52.2503	46.9906	47.0188	45.9736	48.3558	51.7608	65.7887	70.0733	63.9974	69.6328	69.1816	43.665	38.6169	36.3395	38.4893	36.2383	48.6162	67.683	83.6565	163.184	58.0966	44.9586	75.4804	60.2804	54.2933	49.3299	49.5726	52.1578	61.2885	60.521	69.7278	79.8159	79.9873	85.087	59.3041	54.4363	49.3478	45.4831	46.2887	48.1203
1017	0.05	2	23.0373	78.249	92.5858	32.9283	19.5073	9.18682	7.62914	5.88957	4.42453	3.61272	3.27938	3.19219	3.17961	19.8315	14.1204	8.89178	47.1527	58.8444	24.3074	9.18868	5.82965	5.65209	7.50575	9.56573	119.119	218.225	85.267	65.2301	23.8821	12.8868	9.69907	22.2299	28.3933	20.3714	46.8933	483.728	39.6062	31.842	45.9781	166.067	86.4955	92.7085	88.6727	47.998	10.2427	10.3986	95.3565
1194	0.75	7	11.1731	14.7674	15.3949	13.0269	11.9442	9.97369	8.24417	6.82804	5.8752	11.722	10.2442	12.9519	11.7142	9.16673	11.582	11.375	10.8764	10.0625	8.85638	7.39668	6.30792	123.883	32.2686	25.7893	21.7142	26.3323	24.2506	19.3556	76.8173	42.5462	27.1761	21.166	16.0729	13.5816	11.1105	10.2964	9.76353	9.08761	10.7361	10.878	10.2686	9.46526	8.35257	7.04243	5.81946	5.32943	4.71395
[truncated: 433 more columns]

## Sheet: Storage(WG inflow-No Demand)
grand_id	a1	a3	1980-01	1980-02	1980-03	1980-04	1980-05	1980-06	1980-07	1980-08	1980-09	1980-10	1980-11	1980-12	1981-01	1981-02	1981-03	1981-04	1981-05	1981-06	1981-07	1981-08	1981-09	1981-10	1981-11	1981-12	1982-01	1982-02	1982-03	1982-04	1982-05	1982-06	1982-07	1982-08	1982-09	1982-10	1982-11	1982-12	1983-01	1983-02	1983-03	1983-04	1983-05	1983-06	1983-07	1983-08	1983-09	1983-10	1983-11
610	1	4	36620.3	36700	36700	36700	36700	36700	36692.3	36622.9	36570.2	36548.5	36547.5	36554.8	36555.3	36551	36588	36678.1	36597.6	36462.4	36271.5	35960.2	35672.4	35413.2	35174.8	34948.3	34728.5	34630	34687.1	34670.5	34398.5	34050.6	33683.7	33334	33051	32798.3	32577	32455.7	32445.3	32524.4	32785.4	33112.2	33062.7	32779.7	32476.6	32362.7	32339.9	32341.3	32355.7
753	0.8	2	24315	24398.9	24509.5	24848.1	25595	26093	26096.8	25589.5	25092.6	24733.5	24484.9	24232.3	24079.7	23918.7	23759.3	23664.5	23729.4	24763.3	24949.3	24518.2	24008.9	23626.5	23372	23115.2	22942.6	22804.6	22780.3	23701.8	25558.8	27016.3	27815.3	27649.8	27313.9	27238.7	27370.8	27511.2	27829.7	28209.3	28489.9	28995.3	29623.1	30218.5	30072.5	29452.2	28805.2	28363.4	28105
870	0.8	0.05	25011.3	25232.2	25426.5	25656.4	25750.9	25802.1	25642.4	25363.1	25109.6	24942.6	24912.3	24902.8	24884.5	24860.1	24865.3	24817	24664.8	24496.5	24180.7	23715	23183.6	22762.7	22392.9	22079.1	21751.6	21409.5	21130.9	22490.6	24790.6	26179.5	26749.3	26935.2	26966.5	27104.4	27368.7	27574.5	27740.7	27823.6	28004.9	28517.7	29060.6	29105.6	29016.5	28873.2	28729.6	28661.8	28636
597	1	4	23102.8	23158.3	23531.9	23771.2	24567.2	25069.7	24911.9	24472.3	24068.5	23752.8	23517.9	23298.6	23052.5	22771.1	22449.9	22129.1	22003	21829	21402.8	20880.5	20386.6	19966.5	19643.2	19380.4	19101.9	18835.4	18668	18630.5	18735.4	18940.8	18741.7	18331.5	17970.8	17708.1	17543.5	17433.2	17311.2	17229.1	17344.1	17665.9	17981.1	18672.9	18837.7	18598.5	18304.5	18100.3	17956.1
307	1	5	14276	14140.3	14057.6	14122.7	14240.2	14290.8	14218.1	13815.8	13549	13441.3	13423.2	13412.5	13409.7	13398.8	13473.2	13780.4	14434.8	16130.5	16226.1	15879.3	15555.6	15427.7	15441.8	15476	15506.3	15542	15941.5	17034.8	18236.3	20020.3	20959.9	20834.8	20645.1	20591.2	20654.3	20740.5	20868	20971	21081.6	21221.2	21319.4	21324	21027	20540.3	20058.2	19823.9	19707.2
1753	0.15	5	6215.75	6238.54	6260.78	6281.39	6228.88	6154.91	6093.43	6000.14	5943.06	5935.96	5946.53	5975.01	5973.54	6012.3	6020.65	6017.18	5996.8	6045.35	5996.25	5945.04	5916.3	5880.72	5873.4	5890.5	5950.48	6023.19	6046.03	6051.26	5998.57	5931.35	5871.87	5809.09	5851.82	5825.65	5805.55	5920.34	5985.4	6015.9	6011.79	6052.03	6150.54	6129.31	6049.16	5935.51	5837.06	5804.41	5862.75
297	0.65	0.05	4020.42	3040.6	2162.67	1662.76	3087.09	4516.78	4467.55	4271.73	4424.52	4376.97	4285.79	4019.11	3959.55	3812.73	3699.97	3599.54	4621.13	6684.14	7434.2	7142.81	6450.78	5841.94	5045.72	4186.99	3184.74	2223.07	1413.89	754.329	978.222	2016.5	2547.68	2393.1	2797.3	3294.3	3420.59	3366.22	3315.84	3231.55	3304.03	3461.07	4347.11	5672.69	6842.85	6911.6	6327.55	5529.29	4982.15
1036	0.4	2	1426.08	1467.34	1515.19	1573.91	1595.18	1594.5	1557.97	1512.23	1470.04	1439.14	1412.52	1393.34	1362.93	1348.91	1335.16	1310.45	1296.96	1300.81	1291.07	1278.37	1260.13	1241.16	1253.16	1246.83	1256.13	1391.91	1442.37	1432.33	1418.21	1440.52	1487.42	1524.65	1562.02	1592.9	1633.41	1917.04	2048.72	2117.05	2166.17	2241.27	2382.63	2411.06	2390.45	2352.86	2316.19	2290.69	2326.1
989	0.25	2	906.861	909.739	966.263	1049.77	1055.49	1041.16	1011.72	985.353	962.786	930.84	907.707	886.427	860.32	841.757	833.532	814.211	820.447	924.176	1066.9	1087.16	1081.11	1069.86	1110.75	1134.85	1151.86	1239.79	1286.55	1307.94	1315.14	1399.22	1426	1415.89	1412.93	1380.91	1347.67	1398.25	1409.41	1408.66	1411.34	1590.95	1702.27	1728.44	1696.82	1637.97	1579.25	1539.05	1586.33
1135	0.45	3	2459.36	2426.97	2389.64	2343.13	2301.45	2270.78	2215.45	2158.02	2108.3	2136.28	2119.72	2123.15	2105.74	2076.85	2074.16	2058.74	2046.4	2049.67	2020.5	1981.95	1955.57	2049.01	2183.65	2202.26	2194.83	2226.47	2240.97	2237.97	2285.67	2463.46	2520.61	2521.28	2497.45	2472.12	2455.06	2446.41	2430.41	2446.06	2478.68	2488.96	2491.06	2497.27	2476.39	2431.13	2384.39	2380.7	2497.06
1269	0.2	6	3273.1	3296.15	3293.68	3342.09	3340.47	3294.31	3201.31	3115.43	3021.51	2976.31	2968.14	2953.97	2924.97	2912.74	2884.23	2829.86	2796.26	2820.43	2806.55	2719.68	2699.26	2653.83	2638.28	2618.97	2615.72	2624.85	2627.49	2633.88	2658.56	2601.19	2559.13	2520.67	2460.74	2451.14	2466.42	2582.61	2680.03	2743.26	2791.94	2802.25	2805.12	2823.34	2780.86	2749.63	2709.99	2666.17	2646.94
1077	0.6	3	2579.5	2566.18	2552.86	2531.31	2529.24	2536.3	2493.15	2432.16	2383.28	2366.95	2346.17	2332.78	2308.45	2287.18	2275.04	2252.8	2240.91	2225.93	2183.61	2152.05	2123.39	2129.61	2187.62	2198.45	2193.02	2263.29	2276.89	2264.3	2286.24	2390.52	2390.01	2367.33	2335.63	2314.43	2308.29	2334.1	2336.41	2359.56	2388.47	2403.38	2432.4	2447.93	2426.98	2380.78	2338.59	2334.78	2382.45
1026	0.55	3	2231.79	2230.1	2232	2235.48	2211.47	2187.03	2155.07	2115.49	2079.53	2049.5	2031.42	2024.9	2005.31	1997.04	1988.47	1969.17	1961.64	1971.05	1963.42	1950.56	1934.01	1919.35	1942.02	1935.35	1932.89	2013.55	2033.64	2018.07	1994.32	1981.04	1960.87	1937.87	1925.99	1902.06	1888.95	2030.76	2058.49	2067.41	2057.36	2067.76	2119.97	2110.66	2089.12	2057.14	2025.73	2011.51	2028
740	0.05	0.05	942.282	950.773	942.722	906.891	836.407	782.216	757.201	783.294	869.026	886.332	903.935	910.572	896.623	879.328	851.188	829.363	800.53	861.767	910.317	908.91	937.044	1006.39	1008.06	1023.57	1050.96	1064.95	1048.9	1031.9	1010.56	999.552	1008.71	1016.15	1002.34	1099.93	1118.91	1113.71	1099.39	1077.92	1076.8	1047.28	989.822	973.762	979.411	964.951	1044.45	1102.72	1109.34
1294	0.75	7	3091.67	3078.65	3064.14	3049.8	3036.41	3021.8	3002.19	2982.21	2965.82	2954.7	2943.46	2938.24	2929.62	2922.71	2921.74	2923.85	2922.05	2940.83	2952.85	2947.01	2943.27	2941.46	2943.71	2942	2938.73	2936.19	2932.61	2926.09	2919.14	2908.75	2895.61	2880.92	2867.59	2856.59	2846.82	2838.54	2830.72	2828.03	2829.68	2829.02	2820.16	2812.59	2801.39	2788.82	2776.03	2765.28	2754.67
1848	0.35	5	1909.63	1907.96	1951.46	2020.62	2002.47	1959.07	1911.43	1863.52	1813.41	1778.9	1765.09	1772.47	1744.02	1746.69	1733.14	1726.92	1696.75	1679.25	1648.51	1610.07	1578.21	1544.81	1517.31	1496.57	1518.29	1547.34	1554.65	1579.9	1569.93	1543.38	1510.34	1484.05	1452.79	1427.85	1408.59	1521.73	1620.18	1652.64	1665.58	1700.57	1744.2	1764.14	1728.89	1685.31	1644.22	1612.39	1598.85
1869	0.4	3	1781.65	1820.9	1900.84	2067.71	2075.52	2030	1979.1	1919.19	1856.28	1812.03	1764.37	1720.68	1673.66	1646.2	1631.7	1600.42	1558.45	1522.68	1480.53	1428.83	1384.59	1342.33	1303.5	1267.41	1252.32	1274.8	1280.42	1316.07	1357.61	1327.74	1292.86	1258.97	1225.96	1197.5	1168.91	1338.04	1544.85	1653.84	1713.74	1804.37	1868.76	1911.97	1876.89	1826.06	1773.71	1728.75	1692.52
1863	0.75	3	2688.08	2793.58	2963.36	3137.95	3101.98	3064.47	2999.93	2913.08	2823.85	2758.63	2703.38	2647.07	2577.29	2612.81	2619.08	2570.11	2497.79	2439.44	2361.22	2283.18	2208.41	2129.9	2060.21	2001.19	2151.88	2353.65	2441.24	2429.09	2437.21	2382.1	2320.04	2259.63	2190.37	2133.66	2087.31	2172.72	2272.22	2380.37	2446.02	2564.73	2555.97	2515.13	2452.47	2379.44	2316.46	2250.87	2214.44
1770	1	3	2618.04	2698.76	2817.74	2934.48	2923.07	2885.28	2836.66	2781.36	2726.44	2672	2619.45	2574.55	2533.54	2566.44	2616.2	2616.19	2601.01	2590.45	2560.16	2516.23	2473.55	2427.94	2389.64	2392.18	2499.27	2659.76	2770.67	2804.99	2778.76	2741.32	2693.58	2646.38	2602.46	2550.55	2504.45	2578.51	2654.81	2704.75	2729.83	2738.86	2762.54	2783.97	2744.91	2696.06	2647.97	2601.61	2560.12
965	0.15	6	525.96	521.554	524.978	571.095	575.096	566.827	548.034	527.715	509.885	491.948	476.155	459.943	443.026	426.414	411.873	397.476	385.08	373.65	358.225	351.897	344.84	335.711	327.13	324.833	317.459	319.057	346.403	367.795	394.218	440.873	454.31	451.733	446.714	438.946	429.379	419.897	412.801	412.746	422.172	496.358	518.366	532.783	539.624	524.774	508.848	493.862	482.521
1247	0.5	3	1321.14	1301.27	1279.93	1254.09	1233.01	1212.25	1175.8	1135.42	1100.05	1189.54	1186.93	1241.4	1256.02	1247.91	1256.72	1258.53	1253	1241.84	1224.86	1204.81	1186.92	1292.45	1439.52	1451.81	1456.22	1471.73	1485.15	1488.27	1525.81	1614.76	1661.42	1649.43	1628.29	1605.43	1583.13	1561.41	1541	1532.24	1521.27	1512.3	1491.35	1470.41	1443.31	1411.99	1380.99	1351.34	1322.73
7313	0.25	3	451.762	450.144	450.744	456.823	470.285	496.237	449.121	356.346	305.22	293.698	293.714	294.793	295.514	296.145	303.962	314.241	343.841	374.178	321.502	254.134	251.894	251.769	253.355	257.123	263.17	269.336	295.868	337.474	380.001	411.401	372.093	284.145	248.328	249.207	252.446	259.058	267.515	273.729	291.31	315.176	332.023	328.516	300.414	252.759	249.423	252.193	258.729
1287	0.5	3	1735.26	1739.01	1734.39	1732.99	1723.74	1706.16	1676.08	1650.88	1628.77	1620.65	1613.04	1611.4	1605.52	1602.52	1593.89	1580.06	1574.94	1588.19	1590.63	1566.6	1558.15	1551.09	1569.32	1569.38	1566.83	1564.4	1562.31	1561.29	1569.95	1565.21	1554.61	1535.25	1514.67	1511.27	1514.64	1535.61	1545.12	1552.87	1564.98	1563.92	1563.44	1569.55	1557.3	1549.86	1543.49	1531.2	1524
1186	0.9	6	2021.6	2052.84	2053.31	2060.58	2065.84	2054.73	2034.17	2010.41	1988.22	1975.59	1964.97	1955.57	1942.69	1930.92	1919.4	1905.36	1897.3	1909.51	1897.57	1878.43	1864.91	1855.43	1851.98	1843.77	1834.85	1835.64	1830.88	1821.26	1812.36	1798.93	1781.4	1760.76	1738.89	1724.44	1716.44	1753.81	1765.19	1781.61	1802.23	1805.19	1796.51	1786.68	1771.3	1750.79	1730.29	1714	1702.54
1042	0.3	7	788.992	787.059	785.872	785.578	774.158	761.403	742.889	723.352	703.944	688.987	677.926	666.858	653.255	645.55	637.568	628.856	623.614	625.851	617.411	606.272	594.122	585.014	581.555	573.971	574.044	622.396	638.05	631.543	623.706	623.937	615.156	602.571	591.894	581.832	576.084	667.17	701.225	701.851	698.302	708.693	727.397	722.987	713.449	696.211	680.496	676.91	705.723
884	0.05	0.75	178.581	179.569	184.689	182.38	180.41	177.576	184.499	185.518	198.028	206.017	187.84	200.881	198.741	189.206	195.107	197.451	188.819	196.353	198.693	198.952	195.974	199.674	203.89	197.477	192.09	203.927	205.087	194.429	203.732	196.481	192.059	195.188	199.571	182.72	205.04	192.224	182.775	204.763	189.555	194.759	190.786	179.11	198.18	190.49	193.943	178.065	208.58
1273	0.85	10	1838.86	1835.8	1830.98	1825.36	1820.89	1813.16	1795.44	1777.05	1764.31	1758.38	1751.82	1752.11	1749.16	1745.53	1744.44	1743.12	1737.35	1735.2	1727.18	1713.16	1704.02	1702.89	1703.55	1700.76	1697.47	1697.24	1697.27	1697.84	1703.77	1706.48	1700.48	1690.72	1682.06	1676.1	1671.94	1668.97	1666.04	1665.46	1664.84	1663.36	1659.29	1652.19	1641.33	1630.17	1620.76	1614.14	1608.75
961	0.25	10	0	0	0	0	0	0	0	0	0	0	0	0	0	0	0	0	0	0	0	0	0	0	0	0	0	0	0	0	0	0	0	0	0	0	0	0	25.3598	66.1797	111.096	231.493	266.82	282.709	285.763	283.873	282.441	283.153	304.92
1144	0.05	1	203.454	196.187	207.719	213.282	217.176	213.241	217.374	219.78	222.35	221.949	215.434	207.774	214.269	213.503	210.503	211.442	218.182	213.324	207.52	215.572	216.771	225.451	228.995	212.168	214.759	219.743	206.871	210.468	215.197	222.984	208.977	211.109	211.606	213.146	210.945	225.39	217.709	191.252	197.57	204.858	201.782	204.901	208.703	214.816	213.706	216.183	215.022
616	0.85	4	211.442	210.643	209.35	189.198	192.362	149.501	187.822	200.628	186.014	179.072	173.164	193.764	211.519	205.475	198.467	187.809	193.882	194.496	191.89	196.722	202.35	195.139	188.495	183.217	177.881	174.001	213.933	194.858	191.397	198.416	195.422	186.982	213.384	207.217	200.263	195.451	189.539	185.68	200.651	199.865	200.745	198.353	201.693	200.077	188.984	187.858	215.262
911	0.05	2	206.223	207.695	209.209	205.678	209.751	212.49	212.206	213.086	213.8	214.032	213.95	213.793	213.95	214.069	213.885	213.429	214.379	214.832	214.11	214.719	214.627	214.965	214.557	213.858	214.558	214.121	217.145	218.648	217.658	220.669	214.573	208.516	208.017	209.078	209.073	206.812	205.548	211.437	226.205	256.638	265.187	261.456	251.812	226.791	208.264	207.972	204.066
1006	0.65	8	1458.24	1459.66	1461.56	1463.26	1453.6	1441.59	1421.54	1400.78	1384.72	1373.95	1370.1	1365.58	1358.32	1354.99	1351.12	1343.18	1342.02	1351.76	1350.88	1343.68	1334.01	1329.9	1343.29	1342.61	1343.97	1362.65	1362.59	1357.67	1351.24	1352.58	1340.44	1332.63	1334.42	1326	1323.34	1351.55	1351.52	1350.19	1344.95	1358.2	1375.84	1368.06	1357.93	1340.81	1326.7	1332.07	1357.22
1048	0.55	1	1104.42	1092.14	1100.66	1149.17	1190.84	1229.12	1227.08	1203.74	1178.95	1154	1129.23	1105.12	1077.57	1051.02	1025.4	996.578	966.483	937.793	906.243	879.968	851.373	826.634	819.119	812.112	796.114	810.99	822.862	815.662	822.8	889.226	909.218	903.385	890.167	875.832	861.871	852.81	840.41	836.628	837.988	882.61	903.843	931.013	938.994	930.601	919.676	920.47	932.788
1123	0.9	6	1677.64	1684.93	1683.37	1678.27	1674.48	1665.64	1649.3	1630.74	1615.29	1632.73	1629.95	1632.48	1626.88	1625.76	1624.65	1618.79	1616.51	1628.61	1623.3	1612.09	1601.22	1593.66	1591.77	1587.61	1583.53	1603.79	1609.24	1604.97	1615.38	1637.18	1630.07	1619.72	1606.24	1595.93	1590.24	1625.75	1638.08	1638.18	1643.57	1644.34	1663.21	1666.09	1660.37	1644.75	1629.27	1618.63	1612.08
1032	0.45	2	455.411	453.207	456.897	472.6	474.879	465.47	446.887	427.832	414.508	401.817	389.959	379.266	365.16	352.65	342.849	333.034	327.739	325.624	316.43	309.377	298.647	292.184	302.308	303.905	300.919	315.184	318.604	317.037	326.198	372.42	377.883	372.013	365.257	358.857	353.678	357.447	363.428	380.368	393.534	428.952	456.102	469.486	463.659	448.685	437.004	439.168	450.438
1774	0.85	2	1737.52	1761.96	1801.91	1835.94	1836.65	1823.38	1807.53	1786.32	1767.3	1751.07	1735.06	1721.11	1705.74	1701.81	1705.45	1709.69	1703.44	1703.55	1689.19	1671.28	1653.91	1636.24	1621.74	1610.59	1617.75	1677.36	1722.27	1736.55	1727.6	1714.53	1698.63	1682.85	1671.91	1658.23	1651.22	1666	1683.61	1710.73	1729.63	1752.14	1768.13	1770.72	1754.06	1735.27	1715.45	1697.55	1683.65
1781	1	0.8	1458.92	1513.64	1644.76	1834.35	1860.97	1836.35	1785.21	1719.39	1651.92	1583.73	1514.37	1450.86	1389.52	1398.04	1462.8	1515.04	1494.57	1481.78	1440.02	1385.35	1328.97	1269.68	1212.45	1160.1	1180.01	1392.06	1560.13	1618.26	1620.02	1594.12	1548.83	1506.65	1456.35	1399.65	1354.58	1390.39	1467.27	1606.32	1771.1	1897.76	1900.25	1883.84	1835.69	1773.94	1706.25	1636.46	1571.24
355	0.3	4	280.925	279.938	279.877	283.902	297.805	298.193	228.765	175.654	175.741	175.711	176.227	179.329	181.259	182.597	185.203	193.793	213.842	229.603	187.493	175.553	175.623	175.712	175.598	177.035	179.301	181.201	184.345	192.028	204.385	213.841	186.253	175.63	175.69	175.775	178.425	183.899	189.843	194.871	202.598	214.617	247.086	268.148	230.511	175.521	172.447	174.614	178.209
1101	0.95	2	1504.58	1516.63	1572.11	1679.67	1685.46	1663.34	1630.88	1593.14	1553.36	1518.71	1492.05	1496.46	1482.1	1486.46	1485.83	1490.31	1472.03	1456.1	1436.62	1407.38	1377.92	1347.26	1318.84	1291.28	1276.22	1302.58	1325.81	1348.33	1350.53	1333.35	1308.7	1281.6	1253.39	1226.72	1202.09	1319.4	1464.01	1520.57	1531.35	1583.15	1647	1695.5	1669.12	1632.56	1593.93	1557.91	1527.16
1023	0.05	2	157.139	158.236	158.322	197.522	193.865	199.339	175.78	159.094	159.027	159.723	159.573	159.533	160.14	159.82	160.106	160.077	160.438	159.685	160.667	161.199	161.992	162.571	161.064	161.361	161.573	160.887	160.963	161.17	161.359	160.818	160.897	161.328	161.936	162.485	162.564	162.525	162.462	161.732	161.418	194.628	208.283	203.004	181.335	160.356	159.43	159.784	159.804
1060	0.55	5	918.189	914.473	912.4	910.693	902.136	892.364	876.851	859.999	847.125	840.852	834.88	833.265	827.647	824.195	822.835	817.822	816.766	816.622	807.561	800.271	792.823	788.04	794.257	792.469	790.128	806.939	805.851	799.86	793.499	791.463	782.856	770.663	759.844	752.033	747.881	779.476	783.188	787.8	784.671	781.25	789.997	786.042	775.14	762.252	751.568	745.777	744.264
1864	0.25	5	830.41	828.777	837.579	855.406	848.584	833.396	816.316	796.768	778.207	769.828	761.302	756.002	746.325	741.219	735.062	725.846	714.308	705.253	691.612	675.442	662.676	650.43	640.502	633.798	632.821	634.099	631.685	632.951	631.951	622.932	612.103	606.661	601.76	597.981	594.023	623.789	649.769	659.584	663.699	674.731	685.253	689.316	678.169	662.531	648.967	640.154	635.953
1797	0.6	2	1345.29	1360.27	1378.6	1394.19	1389.55	1376.19	1357.72	1339.03	1324.78	1318.96	1317.95	1324.86	1326.54	1341.21	1346.56	1349.3	1340.15	1338.63	1321.39	1309.34	1302.67	1294.74	1297.51	1307.44	1328.56	1354.01	1368.68	1369.88	1360.84	1349.33	1334.34	1333.98	1331.08	1325.21	1327.38	1353.04	1367.69	1381.22	1385.68	1399.06	1403.83	1397.76	1380.51	1361.05	1346.73	1340.41	1344.75
305	0.25	0.25	105.756	113.956	100.914	96.6665	68.9623	70.7629	177.188	190.243	211.93	244.615	319.62	435.504	560.933	629.07	727.051	812.436	908.521	1073.77	965.702	552.778	184.578	109.915	108.419	95.7536	110.258	119.311	86.9892	85.6942	79.3745	93.8769	143.394	178.376	203.011	285.717	395.063	536.538	690.167	806.696	940.701	1038.4	1101.88	1149.65	1028.88	662.692	294.094	109.898	96.5102
968	0.05	7	140.575	140.28	140.338	158.305	171.106	172.017	166.807	160.908	155.343	149.445	144.786	140.428	140.024	139.982	139.942	139.927	143.526	143.565	141.126	141.273	140.528	140.268	140.434	140.09	140.196	139.788	140.195	139.911	141.214	144.934	145.51	141.452	140.572	140.434	140.504	140.496	140.47	140.466	140.668	147.52	146.012	147.5	145.789	140.681	140.011	140.736	140.397
1019	0.7	7	977.491	975.612	984.352	992.127	986.434	978.134	969.085	959.42	950.056	941.295	933.211	925.436	916.663	910.802	908.715	902.841	899.785	910.631	907.433	901.774	894.689	887.345	880.683	873.523	869.852	893.282	917.304	918.565	913.289	907.006	899.559	891.339	884.711	877.259	870.055	910.712	943.792	947.668	948.692	966.811	996.394	992.686	984.518	974.877	965.395	957.449	952.874
1302	0.8	10	1393	1393	1393	1393	1393	1392.77	1391.32	1390.87	1392.59	1393	1393	1393	1393	1393	1393	1393	1393	1393	1392.93	1392.89	1393	1393	1393	1393	1393	1393	1393	1393	1393	1392.38	1391.22	1390.34	1390.19	1392.06	1393	1393	1393	1393	1393	1393	1392.98	1392.9	1392.67	1392.53	1392.58	1393	1393
1824	1	10	1303.66	1321.83	1345.14	1360.26	1354.36	1342.27	1326.43	1304.86	1286.47	1283.33	1288.02	1296.08	1300.77	1319.02	1326.91	1330.5	1323.26	1317.24	1309.63	1295.83	1284.69	1276.76	1280.45	1292.68	1318.41	1341.37	1352.02	1360.34	1353.21	1341.63	1321.96	1310.13	1299.21	1295.32	1297.67	1336.38	1361.2	1362.43	1361.67	1361.78	1361.05	1351.6	1330.13	1305.33	1286.62	1278.81	1287.53
1316	1	0.05	0	0	0	0	0	0	0	0	0	0	0	0	8.4067	21.5776	42.3583	72.369	136.708	204.171	275.018	274.323	274.438	274.116	285.832	285.399	280.316	273.704	268.581	258.415	248.335	237.074	226.199	214.968	204.857	196.566	189.551	181.734	174.132	168.424	163.093	157.393	151.55	146.685	141.617	134.984	130.31	127.451	126.618
1835	1	0.55	916.65	934.576	971.472	1015.36	1013.08	996.123	964.8	932.52	902.194	891.044	877.012	871.686	861.468	870.231	873.287	869.312	849.049	832.405	806.87	784.646	767.742	744.185	733.193	733.677	764.799	803.703	823.124	828.796	819.13	796.206	772.193	762.424	742.107	723.362	714.632	745.929	772.262	799.986	817.128	848.967	869.234	876.872	854.485	820.316	791.035	767.924	759.033
1847	0.9	2	1244.56	1261.2	1284.49	1291.26	1287.83	1272.62	1246.96	1220.85	1207	1227.35	1228.86	1235.7	1235.45	1252.18	1258.92	1266.86	1249.6	1244.12	1224.22	1211.88	1209.31	1197.95	1200.48	1214.79	1246.98	1275.99	1285.25	1288.93	1283.43	1268.25	1249.64	1232.8	1215.4	1210.79	1212.59	1245.74	1262.04	1279.97	1290.85	1292.6	1288.82	1283.12	1267.31	1243.95	1227.86	1220.63	1225.73
1231	0.95	10	1116.29	1119.39	1118.84	1118.12	1116.02	1109.48	1099.98	1092.6	1087.67	1085.48	1083.83	1083.28	1081.8	1080.49	1079.13	1076.42	1075.48	1081.68	1078.96	1072.75	1069.55	1069.35	1071.04	1070.96	1070.63	1071.13	1070.28	1069	1067.79	1064.7	1060.85	1055.34	1050.55	1047.89	1048.13	1056.55	1058.05	1059.61	1062.7	1062.02	1060.48	1059.28	1056.59	1052.75	1049.37	1046.56	1045.22
1140	0.8	0.05	1015.32	1011.72	1006.92	1001.32	996.81	992.847	987.372	982.138	977.084	974.014	970.096	968.696	964.827	960.61	957.45	952.672	948.167	944.078	938.775	933.926	929.25	924.934	920.758	916.66	912.478	908.561	904.204	899.124	896.854	898.074	900.743	895.84	890.96	886.359	882.079	878.915	877.214	891.939	892.519	889.654	884.771	880.432	875.512	870.387	865.412	914.989	1016.07
1296	0.65	10	952.034	955.399	952.675	949.212	946.096	941.915	933.51	924.856	917.505	912.227	907.203	902.753	897.584	893.904	889.484	883.629	878.872	884.443	883.841	876.334	871.291	867.112	872.776	872.278	869.062	866.057	862.977	859.5	861.903	859.76	853.573	846.01	839.354	834.868	831.461	835.889	836.281	843.863	852.53	858.744	861.123	865.747	860.545	854.777	849.905	845.26	840.925
1659	0.9	4	818.586	816.978	842.977	858.898	856.903	851.009	839.963	829.274	818.805	807.281	795.915	785.71	775.788	782.506	785.672	785.83	801.867	811.897	807.689	803.375	822.483	819.481	815.037	810.657	813.667	855.774	947.24	979.043	983.127	981.657	973.894	962.016	949.497	937.294	928.793	955.154	966.243	973.11	980.451	1005.2	1024.28	1032.41	1027.39	1016.31	1003.63	996.5	1012.51
1277	0.05	10	139.261	142.154	143.916	146.05	156.532	165.847	150.865	126.67	123.312	123.182	121.934	124.776	124.564	124.664	125.203	125.124	124.543	138.009	135.978	124.58	124.504	124.633	124.669	124.413	123.642	124.055	124.395	124.36	124.841	124.692	125.141	125.283	125.349	125.414	125.732	127.236	130.924	141.07	154.632	167.498	173.471	177.646	164.331	136.108	123.92	122.668	121.322
1021	0.05	7	122.705	126.839	128.734	137.714	140.608	139.695	134.2	125.98	121.707	121.866	121.826	122.034	121.889	121.905	122.093	121.943	123.313	122.818	122.554	122.049	122.995	123.435	130.623	128.81	124.77	130.794	132.213	130.155	136.844	148.238	148.373	143.018	135.411	128.355	122.488	121.778	121.816	122.291	126.443	146.343	146.911	150.661	147.453	138.617	133.96	131.828	129.32
1280	0.25	7	153.099	146.384	138.424	130.847	123.827	120.764	120.869	120.813	133.249	156.159	153.719	156.773	156.891	156.08	157.856	156.371	149.395	141.276	125.674	120.488	120.536	123.68	124.906	120.877	120.273	120.422	120.245	120.59	120.198	120.126	120.084	120.453	120.488	120.465	120.944	120.587	120.614	120.347	120.791	120.259	120.553	120.729	120.529	120.653	120.723	120.771	120.732
1120	0.95	10	813.195	811.343	808.154	804.149	800.624	795.349	786.517	778.458	772.038	767.314	762.964	759.577	754.946	750.129	745.715	739.901	734	727.779	719.437	712.519	707.064	702.83	699.243	694.979	690.415	687.062	683.35	679.015	685.293	711.354	719.024	722.236	723.194	723.708	723.782	724.764	724.66	724.946	724.984	725.656	725.471	724.861	720.246	713.346	707.035	721.606	754.345
182	1	0.9	795.069	1045.3	1098.25	1097.24	1074.57	993.787	890.689	796.926	715.904	636.223	556.709	480.406	401.056	393.923	443.52	517.136	501.389	457.541	391.155	334.268	299.742	269.315	300.006	583.506	1008.27	1094.5	1102.67	1102.7	1101.85	1078.21	1029.95	944.104	874.032	810.666	820.568	1074.41	1086.63	1100.61	1101.86	1099.13	1098.26	1090.88	1022.38	937.935	871.356	805.894	892.745
7311	0.95	8	864.711	864.118	865.96	870.116	867.859	864.367	858.562	851.976	845.932	841.338	837.851	834.787	831.317	827.88	824.38	820.466	816.871	814.491	811.251	806.947	802.104	798.474	797.393	797.261	795.567	797.074	797.399	796.16	797.054	805.994	806.355	802.941	799.261	796.216	794.097	792.308	790.851	793.113	795.992	805.553	807.553	806.76	802.839	797.304	793.667	791.494	789.789
1755	0.35	2	166.183	178.447	212.506	243.882	242.753	236.815	227.409	214.514	200.343	185.412	171.365	160.81	150.298	179.947	193.979	197.722	199.859	242.097	245.66	237.53	229.444	219.693	211.931	223.9	272.776	324.61	351.964	362.835	363.48	349.681	329.96	310	317.358	297.195	275.608	279.814	295.891	314.354	306.607	320.656	385.045	436.031	425.3	407.906	388.277	370.179	366.815
1152	1	0.05	0	0	0	0	0	0	0	0	0	0	0	0	0	0	0	0	0	0	0	0	0	0	0	0	0	0	0	0	0	0	0	0	0	0	0	0	0	0	0	0	0	0	0	0	0	0	0
1192	0.6	3	724.097	731.728	733.308	736.77	738.288	733.363	721.884	708.823	697.231	693.784	692.949	693.383	690.637	689.415	686.903	682.51	683.021	688.095	681.319	670.169	664.733	663.278	665.633	664.043	663.348	667.123	665.516	662.204	659.475	651.879	642.55	631.998	620.766	616.485	617.684	631.885	641.622	649.784	654.838	654.462	651.849	648.443	642.287	631.927	621.106	614.142	612.016
541	0.05	2	91.0775	91.0246	91.081	91.053	131.866	159.044	120.863	90.8896	90.5583	90.8859	90.7493	91.083	91.1893	91.3455	91.3245	90.3682	94.3637	90.4718	91.366	91.8254	91.843	93.3896	95.011	96.4857	99.9383	101.395	102.362	104.336	162.381	206.365	177.832	120.823	90.6113	90.4945	90.9395	90.8636	90.879	91.0257	90.9993	90.8542	98.4921	116.833	92.1415	90.8593	91.0848	91.2066	91.3854
1822	0.7	0.8	858.097	874.015	896.984	908.142	904.846	894.978	878.695	859.934	847.287	846.281	844.688	850.101	849.659	861.448	866.191	867.869	857.328	853.079	835.66	822.955	815.461	803.738	802.566	811.84	830.99	854.335	868.39	867.698	856.526	840.729	822.193	819.996	813.556	805.834	805.139	830.029	842.798	855.457	859.749	871.462	874.543	870.698	854.79	837.225	821.694	812.558	813.9
972	0.05	8	158.162	155.735	155.486	171.78	169.843	165.741	160.537	156.185	151.367	146.015	141.075	136.096	130.592	125.237	120.068	114.896	112.137	110.26	107.678	105.269	102.083	99.1015	96.7063	93.5631	90.782	90.416	90.4293	90.0472	90.4413	90.121	90.5556	90.374	90.4689	90.592	90.6114	90.6423	90.6466	90.4868	90.4946	96.956	98.0219	97.3448	95.1475	92.032	90.4882	90.6961	90.6436
613	1	3	131.848	134.198	138.605	146.268	164.641	161.474	116.338	87.5324	87.9054	88.6907	89.9478	92.2752	94.2606	95.8336	97.9813	103.231	105.256	91.764	88.3387	88.5236	88.5503	88.479	88.5434	89.1498	89.8142	90.8533	94.21	99.3991	103.572	89.7397	88.2009	88.4972	88.5092	88.5292	87.5597	88.6799	90.0734	91.7796	97.3088	104.259	108.521	94.5222	87.4867	88.1011	88.4288	88.0944	88.7517
1086	0.8	1	438.513	435.732	432.798	429.425	424.885	417.066	405.448	393.494	384.4	377.674	373.349	370.549	367.531	364.567	361.806	358.486	353.932	346.749	337.621	328.32	316.248	308.043	304.735	302.248	299.774	297.484	295.203	292.236	286.819	277.216	263.553	242.851	230.043	225.028	222.879	221.45	220.414	227.185	237.71	247.634	244.498	235.325	223.574	212.684	203.909	197.693	196.022
1295	0.2	10	638.701	640.179	638.071	636.186	633.432	628.306	618.703	610.243	604.272	603.472	602.569	602.51	601.093	601.224	598.378	593.922	594.053	595.957	593.265	584.791	584.021	582.298	587.704	587.921	587.299	586.246	585.401	585.421	588.729	584.305	576.808	570.347	563.596	563.298	566.11	574.689	578.22	582.155	585.479	585.21	583.916	584.773	581.241	579.157	577.654	574.59	573.441
1139	1	10	740.771	739.503	736.516	731.61	726.801	720.747	711.432	702.926	697.756	710.153	711.941	721.033	721.202	720.249	731.37	731.246	730.132	729.515	723.529	717.106	712.543	731.273	748.23	749.03	748.012	750.441	752.272	751.178	762.523	784.043	796.093	793.445	790.135	788.027	786.509	787.64	790.683	794.092	795.182	795.627	793.311	790.942	784.344	776.519	769.408	768.061	768.446
1862	0.8	0.85	565.727	587.052	640.597	705.169	698.821	686.295	663.946	637.541	611.199	590.675	572.212	554.813	533.815	546.92	554.292	549.545	529.692	518.657	498.31	477.521	457.251	435.349	415.763	397.863	426.825	490.036	525.577	525.813	529.825	515.601	497.324	480.394	460.715	443.387	430.042	462.152	491.961	519.532	538.163	572.313	575.513	567.353	549.047	527.027	507.813	488.114	476.144
629	0.05	0.35	42.9315	56.1826	67.0503	38.5962	31.1398	1.82343	33.5676	48.6622	47.8322	48.8035	48.4483	47.3861	47.7538	47.0282	45.419	47.5848	45.3258	47.0877	48.2475	52.8954	50.2116	44.4991	57.3151	50.0279	41.7846	59.4973	50.5493	47.4925	49.9508	50.8564	54.8382	53.5418	52.0373	57.9192	55.2292	52.7035	52.3987	51.0819	52.0923	54.7672	53.472	56.1105	54.6982	59.0006	55.6869	55.2134	55.6371
1000	0.65	3	390.617	394.338	401.194	406.013	402.03	395.763	387.391	378.019	369.461	362.457	359.257	360.948	357.469	358.715	361.098	356.426	362.96	384.191	392.275	388.795	383.569	379.453	385.37	389.553	394.277	414.514	421.484	420.813	416.806	420.553	415.131	408.58	404.953	398.078	393.028	428.267	430.958	429.813	425.514	451.925	463.117	458.861	450.864	440.886	432.235	434.235	458.333
7306	1	10	765.521	770.348	779.303	788.078	786.665	781.972	774.513	766.458	758.867	759.781	760.4	763.101	763.608	768.952	770.352	770.207	765.348	763.113	758.519	752.32	749.172	744.987	745.089	748.661	758.254	766.012	769.66	772.146	769.276	761.928	753.595	751.142	746.773	743.492	743.557	757.35	765.957	774.087	778.649	787.596	788.363	785.44	778.177	768.337	761.872	757.717	758.765
991	0.25	3	179.594	181.203	186.562	196.083	193.407	187.613	178.41	171.302	165.693	161.28	158.002	154.615	150.001	145.125	141.176	136.879	134.303	136.449	136.213	136.492	135.334	134.663	142.509	147.693	148.38	153.452	157.994	159.632	162.276	173.898	175.941	172.506	169.819	166.21	162.734	159.69	156.289	154.585	153.385	173.755	180.538	183.006	182.179	175.659	170.654	167.894	167.342
7317	0.95	4	716.627	722.467	734.888	744.129	742.641	738.914	733.633	726.122	720.147	716.418	713.853	713.487	711.981	715.671	715.993	715.109	710.809	708.006	702.314	696.539	692.143	687.596	686.703	687.905	697.695	709.363	713.939	714.687	711.471	705.324	699.002	696.909	694.032	690.924	689.199	699.559	706.198	713.063	713.867	722.195	729.54	733.815	729.267	722.386	717.007	713.872	714.734
998	0.55	0.85	403.683	441.164	429.519	569.315	742.548	741.449	632.297	503.001	436.911	424.798	420.981	409.615	388.692	361.189	340.34	319.507	257.625	127.551	72.5641	68.0391	62.8062	70.2336	74.1705	74.244	78.529	89.9185	107.699	117.226	99.5275	74.0113	73.7041	73.6498	87.0897	130.063	181.911	230.829	277.44	302.964	357.646	498.97	624.024	661.945	581.121	434.097	335.822	287.911	262.422
1716	0.55	4	517.001	518.292	522.624	525.775	519.902	511.678	503.151	492.278	483.974	480.033	480.571	483.434	481.278	483.434	481.978	478.164	480.015	485.87	478.814	472.548	467.151	462.206	462.561	463.746	471.293	489.096	493.927	493.166	487.132	485.551	478.604	467.847	464.397	463.25	461.935	483.707	495.599	499.452	499.506	505.582	524.493	525.67	515.468	501.58	491.533	495.097	508.276
1896	0.05	3	92.9198	98.6579	108.15	119.079	118.346	116.941	108.87	101.896	93.8588	93.1617	90.9404	87.7122	81.803	86.3295	89.9001	90.1628	86.8193	86.9876	82.7098	77.6445	73.1768	74.1414	73.0491	74.7516	83.4294	94.9919	97.857	100.432	103.222	101.556	99.3743	99.476	93.4891	91.7024	91.3432	101.787	109.967	112.532	116.247	125.11	124.427	120.912	114.084	107.337	105.565	100.418	99.7747
1883	0.05	7	198.595	203.254	209.765	217.772	211.118	205.019	198.429	189.118	180.344	179.16	177.15	175.599	171.715	175.509	178.247	174.462	168.744	165.237	159.095	158.479	153.81	149.267	148.076	148.288	160.292	167.276	168.208	166.562	167.298	165.424	161.219	160.848	156.25	154.987	154.183	156.835	165.654	170.872	176.545	185.081	182.74	177.385	171.657	164.749	162.45	157.685	157.562
1285	0.6	9	558.569	556.437	554.126	552.348	554.08	554.56	550.47	546.224	542.724	540.252	537.842	537.953	536.799	536.616	536.846	535.905	534.356	548.023	553.119	549.753	547.553	545.599	544.061	542.06	539.777	537.582	535.121	532.648	531.794	529.898	526.7	522.824	519.218	516.096	513.769	511.959	510.28	514.102	518.617	520.31	519.059	517.904	514.998	511.861	508.773	506.149	503.695
1266	0.05	10	68.9008	69.5474	68.6705	68.7902	69.9209	68.9385	68.5492	68.5843	68.7178	68.7651	68.9609	68.7189	68.7631	68.7593	68.852	68.7298	68.9118	70.1589	68.9644	68.6211	69.3744	69.894	69.2523	68.636	68.6392	68.6396	68.687	68.9891	69.3764	68.6231	68.6272	68.6183	68.6538	68.9908	69.2169	71.8644	71.3339	75.0764	80.7243	81.6401	82.5172	84.1111	80.8814	78.94	77.2749	74.4225	71.5296
1176	0.05	9	117.866	114.394	109.929	105.221	102.758	99.6639	93.5797	88.6836	86.2833	96.922	97.1371	101.865	99.7214	96.7957	96.0997	93.9875	92.4068	91.3361	87.5199	83.2406	80.5628	82.33	82.9587	80.1305	77.0053	75.0213	73.1279	70.2527	73.1039	78.833	81.6687	79.1309	76.1602	73.7572	71.6212	70.6158	68.647	69.2272	68.399	68.3488	68.543	69.7139	68.0646	67.9685	68.2959	69.5728	71.9422
924	0.25	3	147.895	144.458	147.259	153.876	148.525	152.133	147.482	142.454	145.291	140.146	139.538	145.989	149.823	151.586	158.987	159.093	158.097	156.112	171.606	192.212	186.703	180.919	178.01	175.695	171.376	177.804	214.768	233.002	241.264	254.403	259.299	262.105	257.863	250.593	249.474	262.012	260.284	263.707	267.143	292.256	287.807	276.541	260.22	240.342	224.88	211.349	212.613
758	0.05	4	122.505	123.932	123.839	119.168	104.622	96.3746	95.2572	101.559	116.661	118.373	120.032	119.691	115.433	111.731	106.804	109.898	110.209	120.714	134.58	134.102	139.771	161.44	161.571	159.389	160.766	158.681	157.962	164.072	161.538	154.349	152.043	144.761	133.556	148.224	153.405	146.852	142.947	134.835	127.777	117.904	104.259	106.165	121.386	117.53	118.423	129.309	134.539
1257	0.05	10	0	0	0	0	0	0	0	0	0	0	0	0	0	0	0	0	0	0	0	0	0	0	0	0	0	0	0	0	0	0	0	0	0	0	0	0	0	0	0	0	0	0	0	0	0	0	0
895	1	0.5	565.048	567.294	568.487	570.394	567.793	564.181	555.702	548.898	547.688	545.799	547.087	547.547	547.611	548.226	547.395	546.449	543.291	539.499	534.417	529.633	525.773	524.048	524.217	527.332	529.326	530.503	530.26	530.332	530.141	533.249	528.113	519.954	516.153	520.641	524.77	528.409	533.524	535.543	538.437	546.018	549.275	549.257	548.662	541.877	536.337	535.917	539.38
1317	1	5	486.022	486.275	480.184	473.66	467.641	461.871	448.845	456.793	462.114	459.095	455.674	456.45	455.495	454.931	451.98	445.159	445.14	453.396	454.552	445.941	444.496	440.629	445.693	443.165	439.844	437.655	437.329	431.926	429.259	420.985	408.16	397.329	388.011	382.633	382.852	381.385	378.861	378.29	376.807	371.838	363.065	356.295	356.444	351.758	345.835	347.18	347.96
1242	0.1	10	104.56	101.126	97.0687	92.4377	85.4252	70.0939	63.2804	62.865	65.632	105.41	106.42	106.635	106.788	106.376	105.162	103.186	97.8769	82.2455	65.2156	63.4338	63.6382	63.6831	63.715	63.7101	63.6996	63.7823	63.8203	63.9256	63.8047	63.3281	63.0758	62.2415	61.0443	60.7371	60.1637	62.2272	69.8589	79.3721	81.5057	80.1674	74.6	64.3457	61.9773	60.2191	58.551	59.5858	63.3723
107	0.85	3	354.424	360.405	366.069	369.112	368.409	365.316	357.187	346.405	338.236	333.247	330.356	330.557	331.75	335.905	339.706	340.641	338.94	334.974	326.181	315.043	306.475	302.464	301.594	318.879	338.005	351.758	365.623	371.18	370.694	366.376	358.677	348.95	341.902	338.419	336.233	343.572	354.14	368.598	381.95	392.905	393.046	389.411	382.752	374.014	367.378	363.132	361.454
1841	1	10	579.342	581.173	582.97	583.08	582.871	582.039	580.708	579.216	578.041	578.272	578.241	578.515	578.341	579.65	580.335	580.862	579.964	579.913	578.46	577.539	577.122	576.32	576.495	577.212	579.632	582.844	583.071	583.003	582.401	581.516	580.348	580.142	579.38	579.151	579.565	582.249	583.164	583.145	583.106	583.113	582.895	582.396	581.329	579.972	579.17	578.724	579.077
907	0.05	3	54.5897	54.3037	53.7941	53.3565	53.6472	55.692	55.3907	55.2331	54.3757	55.7395	55.4351	55.5278	55.832	55.6286	55.4406	55.5646	55.4709	56.078	55.6021	55.805	55.7751	55.9859	55.7694	55.5784	55.9635	55.8752	56.9845	58.5836	59.3104	60.8308	61.2481	60.2973	58.9924	57.4721	56.7364	56.916	56.079	56.0313	56.8871	61.3384	62.8831	62.818	62.4821	60.7611	59.1508	58.233	57.8804
80	0.95	0.25	475.592	537.553	554.965	549.704	481.305	394.849	255.174	93.1841	50.0066	48.7444	63.5135	172.557	268.886	293.343	370.944	434.859	409.392	428.95	357.201	230.168	104.415	57.9151	82.727	423.599	541.823	554.824	557.999	559.563	520.488	412.206	280.208	110.974	53.4681	57.328	73.7421	267.364	513.33	553.436	552.555	527.657	491.436	437.005	383.035	247.979	112.562	50.2175	120.186
1236	0.05	7	53.2266	53.2316	53.198	53.2079	53.1893	53.2063	53.2037	53.2557	53.2355	53.3488	53.3111	53.2254	53.1757	53.168	53.1586	53.1349	53.1366	53.0907	53.2987	53.3255	53.3582	64.1147	76.4441	82.2004	87.3113	92.2836	97.7708	103.229	108.175	112.747	104.774	79.9569	58.2652	52.9417	52.9556	52.9731	52.9715	52.9766	52.977	52.9482	52.9121	52.9106	53.2801	53.3284	53.3468	53.6931	54.0493
981	0.05	4	56.8896	56.3582	56.1533	65.3278	66.4246	65.5929	63.8864	62.4883	61.1185	59.6902	58.5389	57.3059	55.8488	54.4455	53.1063	51.7513	52.3022	52.7537	53.0003	53.0824	53.1283	53.1297	53.1727	53.133	53.0918	53.0762	52.9297	52.9645	52.9088	53.019	52.7721	52.5649	52.7521	52.7764	52.7668	52.771	52.6807	52.8363	52.8221	53.4916	52.3728	52.6151	52.1409	52.1839	52.1617	52.6731	51.8902
1093	0.05	4	52.3686	52.4781	52.1602	52.27	52.7663	52.4534	52.361	52.4844	52.8492	53.6594	52.4997	52.5647	52.2837	52.184	52.3688	52.2458	53.5029	56.2471	55.4124	53.9251	52.4098	52.8529	52.6221	52.4088	52.7084	59.1298	59.9284	57.6872	57.4186	60.6876	58.9451	56.2845	52.8823	52.3798	52.6466	57.085	57.5684	55.7941	54.4099	52.6062	57.2315	57.1485	55.3471	52.5998	52.3733	52.5944	52.7244
1709	1	0.8	327.445	353.522	416.754	468.637	485.267	479.755	463.527	442.804	417.112	385.805	352.977	323.55	293.817	291.533	310.119	324.371	332.316	385.479	398.059	390.288	375.929	360.059	346.997	342.497	365.935	460.405	507.441	509.633	506.802	506.997	496.703	476.743	448.131	414.587	382.836	367.17	352.519	363.028	384.736	421.123	463.45	480.532	468.459	447.109	418.009	386.159	356.8
1017	0.05	2	50.1768	50.7475	50.406	50.015	50.1039	50.9266	51.4629	51.9691	52.3219	52.4691	52.5875	52.7359	52.4211	54.124	56.5664	57.8589	60.779	60.562	50.1832	50.3408	50.4588	50.5321	50.4377	50.2537	51.2932	63.3105	70.4106	58.8573	50.2471	51.4897	52.9354	54.446	60.7488	64.2411	67.5841	123.1	161.856	169.196	175.719	191.889	217.638	187.156	118.565	57.5482	49.4265	49.5389	49.1966
1194	0.75	7	351.663	351.155	350.381	349.39	348.319	345.318	339.599	333.448	328.782	327.395	326.303	325.667	324.848	323.768	322.975	321.913	320.776	319.224	315.415	310.676	307.657	313.056	321.915	323.156	323.593	324.917	325.686	325.88	329.727	334.658	335.636	333.622	331.01	329.377	328.616	328.116	327.208	326.29	325.34	324.124	322.658	320.929	317.605	314.03	311.147	309.214	307.773
[truncated: 433 more columns]

## Sheet: Outflow(WG inflow-With Demand)
grand_id	a1	a2	a3	1980-01	1980-02	1980-03	1980-04	1980-05	1980-06	1980-07	1980-08	1980-09	1980-10	1980-11	1980-12	1981-01	1981-02	1981-03	1981-04	1981-05	1981-06	1981-07	1981-08	1981-09	1981-10	1981-11	1981-12	1982-01	1982-02	1982-03	1982-04	1982-05	1982-06	1982-07	1982-08	1982-09	1982-10	1982-11	1982-12	1983-01	1983-02	1983-03	1983-04	1983-05	1983-06	1983-07	1983-08	1983-09	1983-10
610	1	0.5	4	2123.73	4583.12	3663.81	2124	3935.16	4905.99	2104.41	1565.4	1501.39	1547.37	1490.21	1532.65	1526.29	1376.34	1801.68	1664.63	1591.04	1536.83	1391.41	1165.84	1116.61	1152.36	1113.37	1149.88	1189.75	1435.57	1606.63	1374.74	1247.53	1193.6	1176.61	1077.49	1042.39	1080.35	1051.33	1382.97	1370.42	1484.92	2034.78	1814.84	1324.05	1163.03	1299.86	1460.46	1371.08	1436.15
1294	0.75	0.1	7	41.0177	39.0947	39.6118	42.6911	80.3678	43.544	38.9876	18.3227	55.6512	69.5043	93.0987	106.736	98.9206	94.404	263.106	194.432	180.566	519.991	201.364	180.479	160.634	194.435	188.291	165.632	159.433	149.483	150.768	92.3025	110.392	84.082	81.9161	76.4008	68.9169	68.4156	65.6149	81.8511	101.871	178.443	215.009	109.401	112.103	93.698	81.377	72.1499	62.5611	60.8592
1247	0.5	0.5	3	73.6673	81.5324	74.3251	69.5905	100.349	72.3103	56.9613	50.9705	181.081	237.609	163.755	256.859	106.922	88.7489	173.466	111.428	100.484	93.2332	100.47	97.6848	90.7922	721.929	158.893	152.915	140.334	157.435	155.824	121.339	375.143	285.241	194.681	150.742	129.322	121.717	110.413	118.007	127.163	149.453	150.444	139.738	120.668	127.808	99.3002	90.4191	82.4127	82.901
1186	0.9	0.5	6	232.902	165.309	94.1047	143.308	112.341	58.3782	45.7712	34.888	27.9269	29.4867	28.8432	30.8743	29.5782	26.9819	34.3216	33.4023	56.689	145.143	54.9652	42.0087	35.9547	36.1641	44.3788	42.8977	43.7122	94.4359	58.6653	47.4707	45.659	37.2196	30.3519	24.3431	19.6905	19.9238	21.5563	328.467	56.6133	238.891	155.657	59.1319	54.4656	47.102	37.0298	27.7257	22.1928	21.3762
355	0.5	0.1	1	105.544	89.9928	124.376	460.639	727.867	212.317	155.003	104.713	57.9481	50.1765	124.338	132.803	106.175	111.226	155.175	413.677	1131.98	241.571	151.658	129.805	80.3672	31.8042	50.3643	110.591	96.2722	101.432	135.902	235.38	519.34	342.407	144.155	126.475	58.1059	41.1239	139.905	157.771	175.215	185.564	355.27	850.019	1500.75	535.933	149.546	121.945	119.504	127.547
1302	1	0.5	6	16.4249	14.2728	15.1561	12.3587	14.3601	9.70332	10.0519	13.0909	24.3353	30.8507	34.6337	32.0983	33.3593	28.9718	62.1808	40.3012	35.4376	257.672	31.1619	23.8154	20.7218	23.4156	22.1436	19.8341	17.7941	17.6675	16.5543	13.7493	18.183	11.4816	13.642	14.0657	13.3153	13.8202	14.0845	17.4383	22.8612	36.2561	49.6926	19.4842	16.6557	15.3009	15.8117	15.8105	14.3856	15.1621
1231	0.95	0.5	10	137.55	92.9471	63.2034	54.2474	49.4505	35.1651	24.9828	18.0947	13.5316	13.5778	12.9708	14.1181	13.605	12.35	15.0582	15.7469	40.875	277.118	59.9121	36.2964	27.9058	39.9726	82.6623	58.5785	50.201	61.7722	55.2397	43.4889	48.3936	39.7359	32.8716	23.2885	16.7275	15.6084	21.0533	283.731	72.3833	159.105	90.8558	67.5653	54.7578	48.7871	38.3403	28.3375	21.6583	18.842
1140	0.8	0.1	0.05	4.61561	4.16894	4.61561	4.28832	4.41498	3.22661	2.65258	3.3489	4.05307	4.39171	4.25004	4.39171	4.39584	3.97044	4.39584	4.25308	4.26506	3.66141	2.72758	3.36378	3.70471	4.14944	4.04655	4.18143	4.18355	3.77869	4.18355	4.04859	4.18355	3.80612	2.81679	3.00573	3.46105	3.96991	3.88359	4.01304	4.01191	3.62366	4.01191	3.88249	3.97149	3.38038	2.7939	2.69945	3.22717	3.84867
1296	0.65	0.1	10	35.5332	22.176	18.7181	15.659	20.0176	13.5467	11.6293	10.6019	9.63802	9.29067	8.46855	8.89941	9.35059	12.1612	12.5497	10.3997	9.89484	50.7377	14.0361	11.5652	10.0615	22.6036	31.8759	14.4615	14.1634	13.0645	14.1838	14.3148	37.4297	13.9674	11.7762	10.2988	9.39013	9.13333	9.69063	37.9029	28.431	51.3854	52.5427	23.513	53.263	16.4379	13.7653	11.7846	10.0967	9.78903
1277	0.05	0.5	10	1.09006	1.03728	1.10093	1.06797	1.55279	1.19801	35.3134	7.33403	2.8736	2.77025	2.65777	9.32373	6.82445	9.00122	17.563	14.7782	7.65089	25.2781	25.7668	5.22034	3.90137	3.87297	3.03936	2.41196	2.41191	2.89844	3.13015	4.51601	11.6278	4.93446	0.844713	1.15239	1.04201	1.06297	1.02459	1.11738	1.22318	1.23727	1.55177	1.20891	1.23305	1.20283	33.0055	25.5119	2.92929	2.95754
1280	0.35	0.1	7	22.3913	22.15	22.2737	18.4823	34.8952	9.30754	1.84314	1.8142	455.182	239.006	96.5411	163.902	142.447	101.151	166.48	99.5337	82.6063	63.6582	47.4702	32.5349	37.4473	142.897	59.4415	53.6387	50.1822	51.2036	46.4055	39.5594	52.1495	48.5234	38.7322	27.5507	27.1232	28.5687	29.8906	30.8497	34.6701	47.6546	53.5551	34.771	29.5627	29.0269	17.1651	14.705	12.6144	18.5165
182	0.8	0.1	1	318.915	325.589	230.641	132.384	122.208	111.818	112.747	109.062	99.2306	99.9454	96.0257	99.4407	101.605	132.713	156.163	124.111	53.3742	47.4829	46.0845	42.56	37.927	38.0981	104.186	195.976	117.634	222.022	408.012	488.086	163.179	138.457	123.946	114.478	105.177	106.781	213.755	274.543	390.901	510.136	695.356	290.288	170.048	140.456	124.001	116.752	107.403	107.966
1152	0.8	0.5	3	0	0	0	0	0	0	0	0	0	0	0	0	0	0	0	0	0	0	0	0	0	0	0	0	0	0	0	0	0	0	0	0	0	0	0	0	0	0	0	0	0	0	0	0	0	0
1295	1	0.1	10	65.0127	64.8548	38.9894	27.6784	31.1599	17.4538	12.0833	7.84094	6.18993	5.81957	7.71461	12.0805	21.0964	26.953	16.9153	11.8869	21.883	71.0664	27.8798	15.1591	12.8185	15.6052	90.497	25.1446	33.4365	27.0594	33.518	77.971	83.251	28.9003	21.2066	14.946	10.0669	11.7804	116.572	133.946	69.0335	140.697	119.043	30.8983	105.485	24.7418	20.8693	18.407	17.0051	12.8532
629	0.05	0.5	0.4	2077.97	4365.63	3845.41	2142.18	3304.7	4762.25	2174.86	1731.77	1727.78	1785.44	1675.83	1784.8	1784.62	1563.57	1772.47	1635.41	1690.79	1615.41	1707.25	1668.68	1560.94	1612.1	1609.01	1619.83	1644.77	1539.95	1593.95	1534.82	1587.04	1465.15	1595.15	1452.73	1301	1387.07	1302.95	1515.4	1404.02	1303.34	1569.54	1290.95	1285.9	1222.19	1327.83	1587.4	1376.98	1461.58
1266	0.05	0.1	10	13.5594	22.2937	17.2627	16.2425	24.4537	14.7334	10.1072	8.47366	7.68344	7.01395	5.90623	5.03954	4.18965	4.20937	5.602	5.14457	6.86492	9.07725	9.83519	7.01277	8.97689	8.07444	8.57106	7.16273	7.1047	7.59204	9.04335	10.0316	15.762	11.622	9.2437	6.64556	5.33916	5.97396	6.48004	32.9364	21.0369	75.336	43.4658	21.1678	44.3815	17.4887	15.0063	13.6932	11.761	10.6576
1176	0.05	0.5	9	4.75705	4.98017	4.6367	4.77824	12.6168	23.1455	36.8056	31.5261	260.552	56.0105	185.674	123.95	24.043	22.6816	52.047	26.937	25.8773	32.0824	38.1377	27.6099	16.9739	54.2417	16.3046	15.7502	17.3069	23.0506	19.2524	12.6303	134.155	152.056	69.1696	55.6445	36.1521	22.7938	14.6011	12.7464	38.6962	79.7289	29.771	20.0946	21.7825	34.9285	39.6968	31.8734	14.644	125.279
758	0.05	0.5	3	92.3278	83.2391	90.7535	84.4268	81.5006	62.6768	64.3465	63.4034	62.3677	65.1804	64.3147	67.6175	68.0119	61.5493	67.5486	65.3415	66.6195	44.0744	45.9288	45.2926	44.9361	52.6013	53.9033	57.793	60.0202	54.2169	59.4823	58.2087	58.8506	76.1253	78.2855	76.0743	71.3387	79.3761	81.1827	84.735	85.7287	75.8653	82.0911	71.8049	66.8834	57.2669	62.8666	59.8257	56.9332	61.2023
1242	0.4	0.3	10	8.76242	8.00703	7.80474	3.68013	3.30089	3.36036	1.36051	0.287387	344.337	190.247	47.7892	51.5378	49.6564	40.3364	38.2459	33.0379	18.0378	6.24782	5.58697	17.9413	48.4663	14.2713	13.7443	12.6367	15.1783	10.3753	7.63973	1.78076	0.681869	0.235028	0.214965	0.185124	0.151134	0.115398	0.125706	6.74419	163.931	107.426	25.4876	36.1696	3.63543	1.5177	0.179776	0.130825	0.0892196	3.5061
1236	0.05	0.5	8	1.55139	1.49272	1.73414	1.63663	1.86385	2.26432	2.59143	1.30658	1.46552	0.985417	1.39454	4.89949	5.81007	4.7967	8.85612	8.91119	7.54213	7.24346	4.1036	3.21512	2.40541	20.8382	7.27548	6.97484	6.21987	6.19487	7.31997	6.64967	6.88028	12.2078	25.058	23.4859	10.3505	6.77592	5.95678	5.37186	4.85012	5.37389	8.47584	9.21614	8.87028	7.3738	5.45512	4.1153	2.81894	2.56951
1194	0.95	0.5	9	10.9978	14.8189	15.4094	12.9593	11.8124	9.89011	8.20261	6.67376	5.61734	11.6371	10.1056	12.915	11.6171	9.01556	11.4792	11.2846	10.7442	9.95631	8.81175	7.26158	6.06806	128.881	33.1659	26.3774	22.1021	26.9842	24.7524	19.6571	79.6794	43.9001	27.8123	21.5346	16.2077	13.5323	10.9636	10.0914	9.53632	8.89447	10.5526	10.7327	10.0767	9.29473	8.17208	6.77811	5.48522	4.93971
[truncated: 434 more columns]

## Sheet: Storage(WG inflow-With Demand)
grand_id	a1	a2	a3	1980-01	1980-02	1980-03	1980-04	1980-05	1980-06	1980-07	1980-08	1980-09	1980-10	1980-11	1980-12	1981-01	1981-02	1981-03	1981-04	1981-05	1981-06	1981-07	1981-08	1981-09	1981-10	1981-11	1981-12	1982-01	1982-02	1982-03	1982-04	1982-05	1982-06	1982-07	1982-08	1982-09	1982-10	1982-11	1982-12	1983-01	1983-02	1983-03	1983-04	1983-05	1983-06	1983-07	1983-08	1983-09	1983-10
610	1	0.5	4	36665	36700	36700	36700	36699.9	36700	36688.5	36613.5	36573.7	36569.1	36585	36609.3	36627.1	36638.3	36674.4	36686.6	36565.2	36375.2	36140.2	35820.4	35547.1	35306.3	35086.3	34878.2	34677.1	34595.6	34665.5	34642.2	34335.4	33938.6	33533.5	33177.1	32908.3	32673.2	32469.3	32365.4	32372.7	32467.9	32740.5	33063.5	32983.8	32655.1	32316.4	32196.9	32188.4	32206.8
1294	0.75	0.1	7	3089.35	3076.33	3061.8	3047.45	3034.04	3019.39	2999.7	2979.64	2963.21	2952.07	2940.82	2935.59	2926.96	2920.05	2919.07	2921.17	2919.36	2938.13	2950.11	2944.21	2940.44	2938.62	2940.86	2939.14	2935.88	2933.34	2929.76	2923.24	2916.29	2905.88	2892.71	2877.99	2864.64	2853.64	2843.88	2835.6	2827.78	2825.1	2826.75	2826.1	2817.24	2809.66	2798.43	2785.85	2773.04	2762.29
1247	0.5	0.5	3	1323.56	1304.05	1283.07	1257.56	1236.75	1215.79	1178.43	1137.15	1101.39	1190.96	1188.66	1243.47	1258.44	1250.66	1259.8	1261.91	1256.62	1245.58	1228.21	1207.52	1189.33	1294.98	1442.36	1454.99	1459.73	1475.56	1489.28	1492.73	1530.53	1619.58	1665.88	1653.24	1631.66	1608.84	1586.93	1565.66	1545.7	1537.37	1526.83	1518.21	1497.5	1476.46	1448.86	1417.14	1386.16	1356.78
1186	0.9	0.5	6	2028.22	2059.57	2060.16	2067.53	2072.88	2061.81	2041.25	2017.53	1995.43	1982.9	1972.38	1963.09	1950.3	1938.61	1927.18	1913.21	1905.21	1917.46	1905.54	1886.43	1872.97	1863.55	1860.17	1852.03	1843.17	1844.01	1839.3	1829.72	1820.85	1807.42	1789.88	1769.25	1747.42	1733	1725.04	1762.46	1773.89	1790.35	1811.01	1814.01	1805.36	1795.53	1780.15	1759.66	1739.19	1722.94
355	0.5	0.1	1	1486.18	1531.02	1585.86	1693.16	1760.6	1758.43	1649.16	1463.42	1362.9	1321.67	1350.48	1425.22	1488.23	1535.32	1605.02	1737.95	1760.6	1760.22	1669.03	1480.58	1345.98	1293.5	1282.14	1319.91	1369.52	1411.45	1473.8	1594.58	1747.91	1760.55	1677.59	1493.4	1377.15	1344.27	1387.75	1477.18	1583.43	1681.9	1760.41	1760.6	1760.6	1760.6	1716.32	1607.27	1551.86	1586.01
1302	1	0.5	6	1374.89	1375.49	1374.89	1374.34	1373.3	1370.48	1363.36	1357.46	1356.51	1359.9	1362.53	1369.36	1373.16	1377.76	1385.19	1391.36	1392.91	1393	1392.16	1389.09	1388.4	1389.39	1391.66	1392.8	1392.56	1392.18	1391.4	1389.55	1388.24	1384.71	1378.26	1372.38	1367.78	1365.71	1365.11	1365.54	1366.12	1368.87	1373.94	1378.28	1376.14	1374.52	1371	1367.05	1363.4	1361.86
1231	0.95	0.5	10	1114.33	1117.43	1116.87	1116.14	1114.01	1107.37	1097.73	1090.28	1085.35	1083.16	1081.51	1080.97	1079.48	1078.18	1076.82	1074.09	1073.13	1079.3	1076.52	1070.28	1067.08	1066.88	1068.57	1068.49	1068.17	1068.67	1067.82	1066.53	1065.3	1062.17	1058.27	1052.74	1047.95	1045.3	1045.54	1053.96	1055.46	1057.02	1060.12	1059.42	1057.87	1056.64	1053.93	1050.07	1046.7	1043.89
1140	0.8	0.1	0.05	1021.73	1017.83	1012.74	1006.91	1002.28	998.738	994.45	990.286	985.533	982.254	978.034	976.331	972.152	967.638	964.181	959.096	954.35	950.322	945.752	941.727	937.327	932.897	928.442	924.051	919.57	915.368	910.724	905.347	902.78	903.827	906.939	902.845	898.385	893.726	889.184	885.739	883.752	898.205	898.513	895.366	890.221	885.877	881.49	877.236	872.846	922.437
1296	0.65	0.1	10	949.594	952.931	950.179	946.687	943.545	939.34	930.908	922.227	914.85	909.548	904.5	900.026	894.831	891.126	886.682	880.802	876.023	881.574	880.952	873.424	868.36	864.162	869.806	869.287	866.048	863.022	859.921	856.423	858.806	856.645	850.439	842.858	836.184	831.679	828.253	832.661	833.034	840.597	849.247	855.443	857.806	862.414	857.197	851.413	846.526	841.865
1277	0.05	0.5	10	139.247	142.154	143.93	146.079	156.57	165.829	146.948	124.061	122.333	122.125	120.905	124.272	124.552	124.693	125.371	125.243	124.589	137.651	133.363	124.594	124.608	124.574	124.283	123.907	123.181	123.638	124.171	124.662	125.015	124.557	125.014	125.178	125.227	125.304	125.637	127.155	130.858	141.019	154.594	167.468	173.44	177.575	162.711	132.75	122.911	121.673
1280	0.35	0.1	7	154.936	148.575	140.942	133.668	126.891	120.96	120.674	120.818	133.417	156.76	154.755	158.224	158.745	158.296	160.412	159.292	152.626	144.72	128.449	120.436	120.792	123.739	125.481	121.578	120.132	120.295	120.519	120.573	120.334	120.28	120.111	120.324	120.536	120.5	120.769	120.568	120.462	120.364	120.341	120.287	120.467	120.624	120.524	120.652	120.778	120.854
182	0.8	0.1	1	658.749	926.213	1094.88	1087.62	1052.94	959.646	845.427	742.2	655.842	574.588	494.592	417.902	338.208	318.906	344.823	389.69	367.905	326.264	264.175	219.106	192.908	172.052	202.258	437.659	788.513	977.234	1102.69	1102.7	1098.85	1062.64	990.217	891.032	812.322	743.601	736.034	979.989	1082.19	1100.03	1101.64	1095.45	1090.84	1055.3	965.318	867.06	791.061	719.811
1152	0.8	0.5	3	0	0	0	0	0	0	0	0	0	0	0	0	0	0	0	0	0	0	0	0	0	0	0	0	0	0	0	0	0	0	0	0	0	0	0	0	0	0	0	0	0	0	0	0	0	0
1295	1	0.1	10	852.151	856.744	857.714	858.982	859.329	857.049	850.003	844.123	840.78	842.772	844.776	847.667	849.253	852.224	852.176	850.549	853.442	857.895	857.544	851.345	852.948	853.757	861.805	864.714	866.835	868.367	870.064	871.021	871.41	867.562	862.223	857.928	853.372	855.459	860.826	871.202	871.979	871.927	871.796	870.549	869.326	868.442	867.156	867.343	868.151	867.531
629	0.05	0.5	0.4	39.0874	44.509	66.9868	40.9172	36.3872	4.18556	37.7237	35.3016	61.0309	40.6531	46.9256	55.5941	36.7442	56.331	46.4892	45.61	49.11	48.211	46.7834	46.9947	56.3791	49.1215	46.4443	55.1875	44.2199	49.6805	48.8182	50.1469	48.3086	48.8979	52.6227	54.9748	50.6993	58.855	58.0414	46.6133	60.1232	55.0559	53.9665	53.2606	54.4995	56.5189	52.2644	67.2178	51.3062	53.5413
1266	0.05	0.1	10	68.9122	69.8344	69.0358	69.1315	70.1752	69.2761	68.5621	68.5872	68.7218	68.7157	69.053	68.7446	68.7608	68.7733	68.848	68.7332	69.0038	70.4529	69.3051	68.6649	69.7751	69.95	69.5504	68.6502	68.6865	68.6644	68.7057	68.9981	69.659	68.6544	68.598	68.6301	68.6924	68.9696	69.2369	72.0977	71.92	75.9931	81.9682	83.2122	84.4014	86.2571	83.2452	81.5425	80.1601	77.6329
1176	0.05	0.5	9	117.517	114.063	109.616	104.925	102.477	99.3815	93.2769	88.3653	85.9677	96.6195	96.8485	101.589	99.4592	96.5461	95.8632	93.7654	92.196	91.1291	87.3048	83.0156	80.3413	82.1195	82.7584	79.9399	76.8245	74.8501	72.9666	70.1017	72.9633	78.6998	81.5319	78.9857	76.0143	73.6173	71.4885	70.49	68.5282	69.1152	68.3324	68.3484	68.931	70.2438	68.3647	68.036	68.2796	69.5784
758	0.05	0.5	3	94.378	94.2746	92.9617	87.9238	74.1121	68.4252	71.3454	79.5678	95.6094	97.5405	98.9386	98.2508	93.6659	89.7625	85.0131	88.8068	90.2263	100.541	112.797	110.4	113.921	132.675	129.637	124.199	122.348	117.409	114.348	119.115	116.637	110.465	110.329	104.741	93.9466	107.758	111.419	103.064	97.3812	87.9083	80.0836	70.8742	68.0896	76.2192	95.6205	94.4166	96.9784	108.479
1242	0.4	0.3	10	112.346	110.645	108.268	105.289	99.7526	84.8348	65.4214	63.4741	66.3924	107.467	110.386	112.485	114.519	115.903	116.48	116.267	112.52	98.0366	74.6993	63.4206	63.8477	63.7494	63.7669	63.7856	63.8421	63.8312	63.8325	63.9621	63.8646	63.4714	63.3006	62.5422	61.4265	61.2208	60.7601	62.5555	70.3137	81.1464	84.7391	84.8622	80.6112	67.7505	62.6235	60.9391	59.359	60.3017
1236	0.05	0.5	8	55.0459	55.2908	55.4198	55.0467	54.309	53.3438	53.1788	53.209	53.2676	53.292	53.2765	53.2131	53.1772	53.1968	53.1781	53.1549	53.1586	53.1048	53.272	53.3063	53.3372	61.6769	71.0472	75.3694	79.1834	82.9304	87.0627	91.1115	94.7877	97.632	89.2888	67.1796	53.37	53.088	53.1049	53.1038	53.1275	53.1054	53.1046	53.0406	53.037	52.9961	53.1471	53.1751	53.2267	53.2487
1194	0.95	0.5	9	364.723	364.265	363.434	362.466	361.492	358.583	352.914	346.851	342.387	341.157	340.173	339.635	338.862	337.908	337.248	336.261	335.223	333.776	330.019	325.353	322.509	325.847	331.332	331.879	331.899	332.622	332.837	332.631	334.919	337.829	337.674	335.165	332.312	330.642	329.983	329.663	328.97	328.268	327.506	326.446	325.148	323.596	320.443	317.088	314.503	312.932
[truncated: 434 more columns]

## Sheet: Outflow(OBS inflow-With Demand)
grand_id	a1	a2	a3	1980-01	1980-02	1980-03	1980-04	1980-05	1980-06	1980-07	1980-08	1980-09	1980-10	1980-11	1980-12	1981-01	1981-02	1981-03	1981-04	1981-05	1981-06	1981-07	1981-08	1981-09	1981-10	1981-11	1981-12	1982-01	1982-02	1982-03	1982-04	1982-05	1982-06	1982-07	1982-08	1982-09	1982-10	1982-11	1982-12	1983-01	1983-02	1983-03	1983-04	1983-05	1983-06	1983-07	1983-08	1983-09	1983-10
753	0.95		0.05	1509.97	1363.84	1509.97	1461.26	1509.97	1461.26	1508.86	1508.86	1460.18	1508.86	1460.18	1508.86	1508.86	1362.84	1508.86	1460.18	1508.86	1460.18	1598.47	1598.47	1546.9	1598.47	1546.9	1598.47	1598.47	1443.78	1598.47	1546.9	1598.47	1546.9	1823.09	1865.38	1764.28	1823.09	1764.28	1823.09	1823.09	1646.66	1823.09	1764.28	1823.09	1764.28	1820.53	1820.53	1761.8	1820.53
870	1		0.05	1728.34	1561.08	1728.34	1672.59	1728.34	1672.59	1728.34	1728.34	1672.59	1728.34	1672.59	1728.34	1728.34	1561.08	1728.34	1672.59	1728.34	1672.59	1728.34	1801.24	1743.14	1801.24	1743.14	1801.24	1801.24	1626.93	1801.24	1743.14	1801.24	1743.14	1801.24	2164.39	2094.57	2164.39	2094.57	2164.39	2164.39	1954.93	2164.39	2094.57	2164.39	2094.57	2164.39	1865.28	1805.11	1865.28
597	1		2	929.023	909.206	990.095	1107.82	1935.82	1945.94	1055.13	794	880.304	830.322	855.346	876.685	844.095	754.36	820.125	799.562	926.352	1065.77	675.345	600.367	672.995	748.726	641.092	636.493	619.977	655.541	769.547	833.214	1335.54	1461.84	1007.26	837.242	784.248	846.547	784.677	786.438	754.259	704.669	921.991	950.13	1689.79	2830.84	2190.03	1259.13	939.103	1021.59
307	1		1	480.145	433.679	480.145	464.656	480.145	464.656	466.144	466.144	451.107	466.144	451.107	466.144	466.144	421.034	466.144	451.107	466.144	451.107	524.031	524.031	507.127	524.031	507.127	524.031	524.031	473.319	524.031	507.127	524.031	507.127	558.08	558.08	540.077	558.08	540.077	558.08	558.08	504.072	558.08	540.077	558.08	540.077	535.737	535.737	518.456	535.737
1753	0.05		9	6652.6	3993.3	13029.3	5997.98	4858.5	2785.85	2880.28	2319.37	2296.37	1902.3	2523.13	2000.14	1802.74	3506	1879.3	2253.56	1258.89	2910.08	2562.46	2482.22	2115.8	1874.35	1815.17	3665.68	10241.3	8306.88	6147.57	3058.56	1942.99	1990.95	2813.09	3646.75	2761.98	2557.47	3836.34	10106.1	5750.95	6148.99	3970.87	8009.52	8216.04	4026.23	3296.28	3070.75	1947.71	1581.76
297	0.7		0.05	864.582	780.913	864.582	535.483	864.582	836.692	864.582	700.714	678.11	700.714	678.11	700.714	700.714	632.903	700.714	678.11	700.714	678.11	700.714	1109.03	1073.26	1109.03	1073.26	1109.03	1109.03	1001.71	1109.03	719.082	1044.64	1073.26	1109.03	701.054	678.44	701.054	678.44	701.054	701.054	633.211	701.054	678.44	701.054	678.44	701.054	951.878	921.173	951.878
1036	1		2	163.324	237.538	404.06	368.199	284.763	401.788	361.972	252.081	173.652	103.795	159.28	108.189	98.6744	145.29	142.876	123.137	181.635	165.409	155.927	184.041	104.211	131.06	139.933	166.187	385.651	839.664	489.146	265.412	210.718	531.082	296.247	288.421	173.035	157.79	301.07	1741.33	362.976	522.169	498.728	840.615	888.099	333.285	488.401	373.221	193.257	130.72
989	0.15		2	64.4691	398.877	765.379	1262.29	226.731	133.4	116.281	188.152	89.3451	95.1348	35.8581	49.2454	27.5815	41.088	30.2997	52.7374	660.033	2669.42	1012.92	350.528	228.987	533.438	717.105	526.661	603.73	1130.22	1075.24	361.887	1349.94	2151.99	555.106	767.48	267.876	198.366	166.496	1479.23	409.22	615.799	756.982	3571.76	2082.67	775.393	307.126	161.956	165.55	338.521
1026	1		2	102.425	256.644	327.13	254.027	181.358	219.222	116.17	132.91	59.4427	53.9451	78.7554	73.8711	49.7526	61.5958	90.6324	113.479	213.614	357.696	224.068	287.45	125.119	127.692	129.068	144.686	311.541	517.222	272.121	239.612	207.383	427.35	189.729	247.321	108.859	111.79	166.669	1003.42	170.211	395.996	323.619	630.919	560.365	229.206	340.518	182.51	122.719	149.045
1848	0.65		0.05	222.478	200.948	222.478	215.301	222.441	215.265	222.441	222.441	215.265	222.441	215.265	222.441	222.441	200.914	222.441	215.265	136.002	131.615	136.002	136.002	131.615	136.002	131.615	136.002	136.002	122.841	136.002	131.615	150.588	145.731	150.588	150.588	145.731	150.588	145.731	150.588	150.588	136.015	292.024	720.157	777.593	225.71	233.233	233.233	225.71	233.233
1869	0.5		2	255.146	187.931	870.641	493.831	168.835	149.143	120.104	89.9214	124.731	112.436	119.57	95.4333	100.092	149.554	153.399	128.587	88.1299	82.0069	81.4585	63.0202	63.478	65.6088	56.9281	59.4726	220.134	135.572	119.405	444.438	80.7417	81.579	78.7067	96.5697	96.8339	90.9458	151.338	955.891	241.577	416.677	249.729	489.078	490.633	134.294	178.436	116.225	108.036	117.058
7313	0.25		2	214.734	257.906	302.327	419.267	830.824	977.991	378.538	155.198	321.58	350.462	379.638	328.033	291.721	262.638	298.682	340.759	1016.15	1302.4	334.529	149.008	148.664	351.798	350.692	306.211	244.941	316.919	353.147	439.173	883.671	1343.95	780.603	245.391	340.409	438.809	425.807	345.46	355.55	306.287	387.228	416.783	607.237	918.606	729.7	299.371	344.079	490.455
1042	0.6		3	87.9205	99.4543	126.837	139.056	102.884	102.943	73.8634	67.4578	66.8669	68.5087	66.7454	68.8024	68.2925	65.5959	81.6351	78.0474	88.8383	76.137	64.8648	63.303	51.5752	59.8382	56.149	58.1892	87.8002	156.99	94.7297	85.3996	108.684	110.055	82.6596	68.5898	58.4809	61.4797	84.7671	384.229	96.1937	85.6894	92.0943	204.059	221.229	114.84	105.966	90.8221	84.291	95.5551
884	0.05		2	1865.81	1308.8	1635.74	1557.3	2154.25	2040.64	2421.04	2749.52	2131.61	1930.12	1920.8	1138.8	1407.25	1377.47	1786.84	2524.06	2250.88	1809.59	2192.26	2343.87	1799.5	1500.39	1100.42	1292.69	1482.37	1078.03	1426.77	1734.14	1707.64	1244.45	1977.52	2367.81	2253.08	1751.54	1925.39	2055.19	2253.02	1572.43	1371.34	760.401	968.523	1595.68	1447.47	2755.21	2032.4	2071.36
1144	0.1		0.75	1297.12	1559.62	1149.13	1072.37	1230.39	862.307	574.962	416.507	400.551	1392.14	890.514	1331.88	825.894	842.854	1017.09	796.682	910.34	1933.14	1009.25	760.504	608.922	2060.08	1875.25	1306.5	1030.86	2371.66	1511.53	990.113	2346.7	2971.3	1632.69	1111.67	885.324	840.454	864.97	4149.5	1627.39	1988.02	1849.97	1378.21	1785.27	1185.37	1112.61	843.042	695.73	702.866
1006	0.6		7	24.8615	71.2453	126.604	111.883	47.2454	30.9395	12.5917	16.1582	12.5444	21.5797	13.5657	16.4469	12.5019	16.6922	20.601	21.12	63.3578	207.778	59.5587	38.6085	13.5014	58.4592	70.3215	45.9179	106.67	115.23	86.2856	52.3259	93.6731	120.831	34.9888	72.3907	35.2842	22.7475	42.2051	268.088	60.8269	49.1715	38.6655	333.224	193.318	68.4382	65.3287	18.818	17.8286	140.033
1048	0.3		2	250.909	260.378	406.531	1420.73	1156.27	1036.08	123.356	117.681	37.4514	75.5459	42.9577	74.5802	105.245	61.809	71.6102	59.2556	264.913	356.472	275.066	178.843	150.688	237.157	703.638	168.461	165.901	391.739	485.26	170.247	2317.82	2077.58	936.764	232.9	68.5417	55.3046	69.9902	103.597	177.485	269.111	550.786	1572.01	1242.33	860.901	642.302	84.7647	109.986	481.85
1032	0.95		2	40.5466	117.571	319.637	451.806	100.646	32.5764	14.2439	20.8675	19.8145	18.1851	8.85236	15.1299	10	14.1984	17.6859	37.62	75.3809	116.47	84.8609	39.85	56.91	59.324	149.73	52.7931	109.465	192.968	210.331	44.5492	437.251	861.914	194.153	58.4327	24.21	19.9874	35.311	152.792	118.976	377.605	283.743	1145.98	495.69	164.256	65.8568	9.12722	10.8977	162.117
355	0.45	0.3	2	146.501	152.577	195.017	171.996	258.427	416.915	353.032	237.125	257.159	198.977	186.586	176.591	163.661	143.681	156.797	113.743	318.624	593.095	207.128	121.057	140.182	197.463	178.711	179.314	149.03	172.623	223.281	153.182	168.242	461.782	484.631	261.891	262.278	351.353	258.447	245.313	270.927	251.104	233.902	179.958	305.265	658.214	598.524	252.43	240.811	289.298
1101	0.05		5	143.813	85.7829	563.919	529.218	81.8616	104.33	87.5017	36.2229	38.7054	40.2856	130.406	60.7301	37.4382	113.135	70.2601	153.23	63.9422	231.028	92.1259	39.7694	70.3685	41.2219	21.1819	44.4597	124.874	224.824	153.821	182.451	71.2763	70.9729	51.8525	126.91	45.5731	47.1391	35.6542	438.844	467.817	190.39	195.965	319.954	366.96	154.951	90.2409	46.3246	36.0355	38.5354
1023	0.05		4	138.06	165.379	307.961	669.019	177.016	107.025	25.4807	64.1223	23.4089	22.8956	21.9665	36.0455	30.7349	28.2199	39.4144	32.7101	135.607	177.516	122.843	105.473	51.2907	116.073	417.622	97.9797	64.0594	235.686	226.064	87.2677	581.709	939.411	269.428	79.1688	47.4985	32.6425	35.1251	49.0971	54.6115	117.579	338.774	867.636	381.934	417.413	340.272	57.0862	39.5025	74.7677
1864	0.35		4	129.876	71.5769	411.625	242.304	67.7528	58.672	39.7357	33.9038	40.7442	45.6051	67.8729	41.7251	35.7231	79.4664	83.8513	55.7211	53.1543	42.17	38.962	32.26	32.3369	45.7016	30.8014	33.6896	113.373	74.826	53.1313	187.281	49.1368	53.5688	35.047	94.6667	114.093	117.815	93.912	530.183	132.565	193.18	167.016	288.092	311.177	53.3449	71.2413	39.4338	96.6419	49.3174
1021	0.05		5	23.981	20.6014	33.1105	79.1883	63.7558	96.0449	8.08945	3.37979	0.846698	1.29385	0.782801	10.061	5.86709	3.13459	14.8671	4.65228	66.8267	33.4467	12.7612	13.907	54.5252	26.9105	117.521	18.6377	11.6948	32.9176	34.9175	12.1853	185.518	183.144	151.249	17.9695	4.98194	2.69997	8.79984	10.508	10.0507	20.8144	58.8256	99.7131	62.6761	136.13	25.2518	1.06884	18.8583	18.6351
1120	0.05		9	1.9546	3.34779	3.88014	2.46984	15.9625	5.53286	0.0769046	0.059001	1.89431	0.748441	0.866794	1.90541	0.79099	2.22729	3.54478	4.69227	8.38399	18.4878	12.3532	4.69609	5.44893	24.9797	3.63389	1.188	4.73084	4.06696	11.8018	3.90469	125.678	62.3186	34.1983	16.2104	14.6997	1.41628	1.52038	4.82048	6.23139	13.5291	6.98022	6.91429	34.8081	14.0614	0.411502	0.255964	0.0570978	142.018
182	0.7	0.1	0.7	837.519	778.424	586.856	495.562	473.094	295.149	258.03	206.204	213.648	183.671	193.238	227.792	217.719	210.763	293.009	255.758	152.971	104.872	108.775	104.023	105.049	102.963	333.765	584.15	490.876	931.569	893.059	1343.67	904.098	446.45	285.67	247.322	223.271	244.563	351.237	582.937	615.318	927.706	1488.43	843.967	983.802	899.68	473.577	265.107	234.096	212.239
7311	1		5	7.37864	15.9099	73.9369	38.0588	16.7241	5.65417	4.30293	4.98658	4.11518	4.34045	4.13665	4.85095	4.25627	4.13077	5.04093	5.64782	16.6668	19.4157	4.37591	5.49692	3.89687	8.20096	16.1913	6.80023	6.87558	13.5602	27.2435	5.39305	82.0422	178.723	9.31127	8.2574	3.93199	4.5931	4.0677	21.9629	10.1305	53.505	57.9351	131.858	55.575	13.5538	7.62862	3.78257	3.80144	14.8141
1755	0.6		1	102.545	122.133	186.685	82.9305	65.7792	52.3784	48.9608	44.0221	39.4062	38.3593	37.9897	46.7603	52.3006	166.005	81.7849	85.0754	57.7288	165.257	46.3812	40.1394	35.2073	33.8881	44.4056	112.52	213.014	157.334	81.547	84.622	94.7011	76.6646	71.9885	71.3471	125.654	66.5777	65.8134	179.798	109.87	134.819	93.3166	190.537	363.955	79.1616	54.5824	46.7308	42.6971	52.6473
1192	0.45		7	371.993	446.299	264.495	420.939	396.986	92.6453	44.8759	41.1832	45.9372	46.7724	64.9475	72.4714	60.0545	78.3196	98.8894	78.3958	260.36	500.471	116.248	55.1026	51.4727	107.839	79.5927	66.5176	88.3846	173.548	117.986	101.696	135.658	131.283	95.3321	43.3973	55.5257	64.948	95.7091	480.986	181.483	488.283	378.009	198.058	155.42	98.4931	144.902	59.3546	43.6876	46.1971
541	0.15		0.85	36.5964	34.4884	44.4331	120.144	342.335	473.129	155.608	70.7659	57.5277	50.2313	35.9707	36.0616	27.7841	27.825	32.9607	44.1709	67.3114	121.568	72.5842	52.9009	41.8369	38.7328	33.3325	33.4162	32.6397	28.1743	44.3425	86.0454	182.178	260.97	204.91	172.441	141.059	81.3691	43.2239	38.538	35.4517	33.2341	52.3273	75.5752	187.804	401.964	252.342	177.675	123.523	70.3257
1716	0.5		9	28.1735	39.7584	79.9193	30.2571	18.0114	12.5702	10.8516	8.16558	6.34053	5.79763	5.88043	14.1351	11.3045	49.3187	15.7562	13.7419	83.1681	28.2958	14.4837	11.8775	9.35789	7.86662	7.09118	22.2797	105.401	117.305	42.9595	26.0375	17.7193	17.4518	12.4517	9.08751	7.81746	7.40288	7.3729	225.105	36.626	37.8883	42.9641	113.132	125.633	40.8663	16.8416	13.8326	11.3943	69.5799
1883	0.35		2	63.691	52.7308	57.8709	79.8729	81.5695	49.2797	52.459	43.2376	18.3733	20.5752	40.3994	40.738	40.3554	39.5189	48.307	48.2731	62.436	89.5489	53.3453	50.895	47.007	45.5543	39.5799	39.4578	41.8254	39.8925	47.8158	51.7518	49.267	39.9115	24.1139	19.5292	14.5665	13.3006	12.4738	82.8605	42.3293	155.512	62.7929	45.1335	80.5	63.5155	52.3126	51.6634	46.5772	42.3152
895	1		0.45	1426.79	1056.69	1554.84	2105.87	2306.06	2153.43	2595.33	2693.57	2529.97	2649.66	2460.45	1213.8	1033.79	885.675	1696.97	2433.62	2474.05	2315.33	2532.59	2405.5	2457.52	2543.3	1376.04	1070.12	1110.12	902.512	1348.17	2095.56	2195.74	1951.66	2307.93	2383.43	2344.23	2588.31	2858.87	1978.55	1824.89	1495.1	1627.33	1200.32	1866.35	1573.49	2102.94	2644.61	2566.38	2669
1093	0.05		3	27.4088	45.3987	38.3227	72.1505	161.684	38.5588	0.660878	0.591497	1.48106	26.4138	11.1294	52.8572	6.87065	43.6474	90.2173	37.5519	170.403	244.554	57.8193	27.8059	7.7723	147.436	52.2024	27.1844	154.683	205.328	105.018	29.4547	302.407	173.648	19.2821	12.6457	0.730762	4.32082	23.3067	304.283	45.9553	93.1967	97.4895	132.823	380.62	38.3805	46.8747	6.75785	0.700988	2.44454
1709	0.55		8	173.054	162.073	328.715	276.544	150.31	46.1062	121.821	87.7315	20.4554	31.612	95.7526	90.8895	57.0923	280.607	220.234	299.406	329.005	345.548	65.9197	116.274	62.0156	108.682	87.237	225.22	256.86	347.39	480.991	158.941	97.3793	243.036	71.0303	51.7033	24.6112	53.9023	136.432	187.852	65.7707	153.615	257.124	306.774	214.813	98.1678	129.076	14.2488	6.34775	62.0284
1017	0.3		0.95	33.1749	49.2345	60.231	67.7884	40.3422	25.8049	18.0035	18.5795	17.0501	15.9477	18.3149	21.0357	17.4157	23.0803	23.0956	32.9512	95.2759	58.2351	67.1373	30.235	22.2543	24.9497	53.1734	35.3281	54.8236	163.621	64.9471	66.8666	45.2264	54.9944	36.4245	100.558	80.2349	53.4602	51.9178	376.884	78.7026	52.8163	43.9627	162.224	254.228	69.7141	55.9002	51.1228	49.624	58.0128
[truncated: 434 more columns]

## Sheet: Storage(OBS inflow-With Demand)
grand_id	a1	a2	a3	1980-01	1980-02	1980-03	1980-04	1980-05	1980-06	1980-07	1980-08	1980-09	1980-10	1980-11	1980-12	1981-01	1981-02	1981-03	1981-04	1981-05	1981-06	1981-07	1981-08	1981-09	1981-10	1981-11	1981-12	1982-01	1982-02	1982-03	1982-04	1982-05	1982-06	1982-07	1982-08	1982-09	1982-10	1982-11	1982-12	1983-01	1983-02	1983-03	1983-04	1983-05	1983-06	1983-07	1983-08	1983-09	1983-10
753	0.95		0.05	23115	22869.9	22819.4	22856.2	22579	22995.4	23707.5	23706.2	23700.6	23888.7	23961.8	23515.1	23312.9	23164.7	23197.4	22695.6	22242.1	23939.5	25297.1	25204.9	24743.1	24444.8	24301.6	24112.6	23619.7	23472.8	24027.1	25201.1	25678.3	27129.5	29537.2	30151.2	29690.9	29588	29382.2	28905.4	28506.3	28298.2	28691.3	28352.9	27638.6	27859.1	28915.2	28970.8	28286.5	27678
870	1		0.05	21064.5	21340.9	21921.1	22140.7	21690.4	21382.8	21159.5	21054.1	20940	20902.7	21120.6	21338	21304.9	21688.2	22161.6	21905.7	21372.1	21337.4	21645.6	22071.7	21828.8	21430.9	20824.1	20544.3	20359.5	20951.3	22133.4	23757.7	24591.3	26129.1	26369.7	26108.1	25450.1	24971.9	24930.8	25066.1	24506.7	24286.7	24956.4	25181.2	24860	24032.4	23224.2	22709.1	22736.9	22268.5
597	1		2	15998	15735	15608.9	15375.1	16189	17762.8	18411.5	17860.2	17384.2	16907.3	16484.7	16099.7	15691.3	15240.6	14786.2	14240.1	13813.4	13671.5	13336.4	12874.5	12522.3	12345.8	12117.5	11831.1	11474.9	11232.4	11148.7	11040.4	11564.4	12574.1	13331.7	13307.3	13296.5	13321.1	13368.3	13390.2	13298.6	13262.5	13371.9	13548.9	14388.4	17077.4	20101.6	20895.3	20675.6	20438.7
307	1		1	15230	15057.6	14929.7	14889.3	14721.5	15250.5	15855.3	15673.1	15394.7	15184.3	15138	14986.5	14937.5	14871.1	14918.8	14839.4	15009.9	16961.7	17765.6	17493.7	17066.2	16747.6	16501.5	16283.8	16013.6	15990.6	16318.7	16574.5	16725.5	18056.5	19339.6	19294.8	19036.6	18860.7	18699.2	18553.9	18406	18290.2	18264	18096.2	18027.5	18152.2	18339.9	18265.8	18002.3	17748.7
1753	0.05		9	6228.09	6248.92	6267.05	6281.02	6227.7	6153.99	6093.83	6002.23	5946.97	5941.67	5954.15	5984.31	5984.51	6023.39	6030.27	6026.51	6006.45	6056.32	6008.76	5959.63	5933.08	5899.77	5894.73	5914.1	5973.85	6042.15	6062.1	6066.29	6013.62	5947.52	5889.56	5828.69	5873.3	5849.08	5831.12	5945.85	6007.71	6035.89	6029.92	6067.9	6163.8	6140.8	6061.93	5950.14	5853.71	5823.1
297	0.7		0.05	2505.26	1797.71	1147.34	768.987	2200.17	3772.38	4300.26	4163.2	3909.76	3611.32	3244.84	2826.28	2552.4	2128.4	1728.53	1395.8	2096.3	4370.97	6069.1	6683.53	6225.89	5541.65	4774.8	3939.66	3014.8	2170.03	1447.52	788.528	965.032	2639.06	4165.87	4297.94	4232.31	4074.24	3786.31	3403.15	3026.83	2636.69	2297.93	1978.74	2388.33	4237.75	5351.81	5680.61	5298.17	4741.9
1036	1		2	3514.05	3478.15	3468.83	3474.28	3452.32	3436.34	3435.62	3397.73	3352.84	3305.32	3269.45	3231.5	3180.13	3144.06	3104.67	3056.53	3020.69	2994.85	2954.55	2924.76	2884.88	2843.68	2818.2	2785.72	2783.31	2900.61	2947.83	2961.86	2935.37	2949.33	2978.71	2967.38	2951.25	2917.59	2896.24	3123.19	3259	3278.66	3317.77	3406.66	3547.52	3574.16	3576.53	3558.4	3530.99	3481.02
989	0.15		2	670.617	688.494	728.221	838.926	872.87	879.357	843.175	788.582	738.364	678.554	642.666	639.99	640.063	639.861	639.796	639.722	653.821	728.02	860.157	840.104	791.213	746.263	750.753	725.632	689.625	711.39	722.252	714.765	695.982	821.662	842.324	825.346	812.462	762.941	709.575	739.807	740.067	716.359	693.304	852.659	1014.62	1045.67	1000.87	921.985	850.574	794.085
1026	1		2	2240.27	2229.44	2230.04	2243.97	2224.22	2207.17	2182.65	2147.85	2114.17	2080.63	2060.5	2040.21	2011.08	1986.24	1962.52	1936.91	1929.09	1940.19	1950.2	1955.34	1945.75	1933.89	1936.34	1922.45	1922.75	1992.39	2000.92	2007.85	1997.59	2013.93	2023.47	2016.94	2012.36	1992.83	1979.51	2098.16	2128.9	2137.81	2158.25	2204.37	2277.74	2277.92	2278.53	2259.68	2235.98	2217.29
1848	0.65		0.05	2479.84	2538.94	2760.75	3409.05	3500.31	3373.56	3224.99	3042.33	2859.89	2717.45	2613.85	2530.47	2382.57	2307.99	2232.95	2223.02	2157.87	2218.05	2180.21	2087.94	2031.2	1953.81	1885.73	1832.59	1899.67	2063.07	2130.06	2281.85	2373.55	2359.85	2282.66	2225.09	2181.85	2222.23	2184.01	2620.58	3321.42	3571.15	3711.72	3719.28	3714.39	3623.91	3457.96	3290.93	3102.88	2942.48
1869	0.5		2	1206.87	1222.16	1336.14	1595.81	1628.74	1580.98	1529.6	1457.26	1376.39	1335.86	1277.16	1222.85	1154.22	1120.63	1077.73	1035.05	982.175	962.599	930.916	884.891	847.107	808.609	772.267	736.086	750.7	775.754	778.6	862.039	914.052	881.226	854.464	832.564	817.166	803.804	783.669	992.385	1268.42	1411.55	1501.97	1632.58	1739.98	1788.83	1738.69	1676.44	1606.63	1540.94
7313	0.25		2	271.547	272.7	276.49	282.678	309.73	357.329	332.2	256.17	246.402	251.772	260.517	266.884	270.807	272.85	276.945	281.682	314.574	382.457	350.723	262.859	249.532	249.147	255.572	260.773	261.036	263.985	273.017	283.694	304.463	352.94	358.432	278.688	246.514	249.848	258.512	267.455	271.801	274.142	278.179	284.094	294.951	312.702	314.344	262.426	245.393	258.897
1042	0.6		3	1301.58	1302.15	1329.61	1404.44	1432.54	1445.55	1433.49	1396.89	1360.41	1329.16	1305.32	1282.06	1253.64	1232.09	1213.49	1204.94	1207.89	1221.56	1212.81	1190.54	1164.46	1138.36	1124.42	1103.71	1089.91	1202.82	1248.65	1266.39	1286.87	1331.04	1348.81	1333.51	1311.21	1283.69	1267.36	1593.92	1717.27	1736.78	1749.13	1863.12	2020.28	2035.5	2014.78	1961.01	1904.86	1864.46
884	0.05		2	227.983	222.807	224.892	227.761	222.425	221.532	208.886	209.88	221.952	229.86	231.077	226.202	229.846	229.574	225.665	223.382	217.286	217.195	220.709	218.233	207.897	228.208	228.908	229.624	229.37	227.732	229.509	230.524	226.875	229.348	220.979	212.243	210.007	234.406	231.576	225.323	219.007	217.967	229.589	228.382	227.305	223.591	223.005	208.767	220.404	225.469
1144	0.1		0.75	209.974	218.268	214.658	210.731	206.707	213.444	217.449	220.68	221.762	233.073	223.699	219.335	215.588	211.702	211.911	214.123	224.27	239.58	231.143	214.01	216.745	223.567	246.027	235.047	213.898	230.031	230.961	217.345	224.921	275.461	274.068	243.337	213.678	210.256	210.24	247.926	265.487	251	251.195	232.154	215.435	208.723	216.709	212.102	215.05	215.804
1006	0.6		7	1427.09	1424.82	1425.34	1433.35	1425.39	1413.09	1392.57	1370.73	1353.91	1342.79	1338.62	1332.62	1324.18	1318.06	1310.93	1301.58	1298.79	1307.67	1313.57	1306.83	1296.14	1290.92	1299.32	1297.41	1297.29	1311.32	1311.44	1308.24	1304.6	1312.64	1303.41	1295.27	1294.91	1286.5	1282.98	1308.77	1313.79	1311.98	1306.29	1324	1351.84	1348.59	1341.31	1323.48	1308.23	1311.18
1048	0.3		2	920.057	909.741	898.33	894.891	898.711	898.096	886.582	865.687	848.953	834.191	821.153	809.621	796.168	783.911	772.296	758.54	747.765	741.62	728.85	719.426	706.958	698.646	701.882	696.426	687.123	687.144	682.763	673.458	679.524	709.137	713.348	702.935	686.773	673.503	663.648	659.794	651.99	648.225	642.603	649.319	656.433	659.282	655.044	639.67	625.522	622.694
1032	0.95		2	830.278	820.489	814.576	828.167	824.233	806.719	780.035	754.272	736.532	721.078	708.15	697.264	683.185	670.63	659.246	646.831	639.578	631.584	618.388	605.18	591.214	582.613	586.218	579.115	571.043	573.375	570.926	564.128	564.737	598.398	606.147	590.168	575.767	563.511	555	557.226	556.996	566.921	570.223	603.331	639.815	642.092	628.13	604.905	587.562	584.898
355	0.45	0.3	2	316.291	316.289	318.651	321.268	321.989	327.456	290.84	219.299	194.705	195.565	200.543	205.385	209.125	211.845	215.222	216.831	222.607	248.038	219.346	172.939	172.803	179.216	186.417	193.218	198.367	203.615	212.591	221.108	224.509	237.834	231.64	181.229	173.52	184.895	199.128	211.204	222.776	234.454	245.709	253.531	261.81	281.55	292.341	231.895	194.608	197.818
1101	0.05		5	169.408	169.094	175.143	202.973	204.84	197.318	186.138	173.949	169.619	169.986	170.248	169.759	169.853	169.958	169.368	170.443	169.631	173.836	173.214	170.08	170.028	170.587	170.062	169.964	170.449	174.451	175.781	178.242	177.665	172.41	169.851	170.081	169.812	170.12	170.394	185.435	208.946	213.083	215.5	223.06	231.584	238.784	224.545	206.517	188.38	173.156
1023	0.05		4	161.596	161.32	161.866	175.473	173.97	166.761	162.988	162.744	163.035	163.257	163.136	163.171	162.901	162.969	162.982	162.941	163.087	162.174	161.805	162.18	162.443	162.416	166.989	162.666	162.797	162.977	162.656	162.048	168.088	189.781	195.679	182.521	167.815	162.878	162.902	162.681	162.327	161.325	161.974	179.052	177.421	176.574	177.293	165.623	162.796	162.888
1864	0.35		4	761.136	757.224	762.922	779.723	773.799	759.043	743.041	724.364	706.531	699.612	692.057	685.963	674.886	669.773	662.487	653.491	641.853	634.258	621.713	606.624	595.07	584.097	575.657	569.869	570.2	569.689	565.112	565.806	563.933	555.713	545.772	542.294	541.953	541.597	537.949	561.677	585.211	593.061	597.802	609.203	619.701	623.816	613.988	599.549	588.994	582.405
1021	0.05		5	121.812	121.807	122.244	123.253	124.141	124.156	122.285	121.324	120.84	121.363	121.492	121.923	121.871	121.931	122.105	121.897	124.122	123.605	122.077	121.997	123.736	123.171	127.785	122.851	121.896	123.27	122.153	121.996	128.579	138.945	137.629	130.107	122.043	121.743	121.931	121.844	121.825	122.094	123.098	125.218	122.074	124.599	122.862	120.241	121.999	122.71
1120	0.05		9	114.537	115.082	115.04	114.915	115.316	115.021	114.936	114.265	114.386	115.368	115.708	116.609	116.071	115.529	116.946	117.477	119.182	125.705	119.338	115.066	115.005	116.549	114.574	114.376	113.924	114.889	115.259	115.001	129.027	148.445	148.479	135.492	121.305	114.3	113.421	114.908	114.868	115.219	115.145	114.947	116.435	115.043	115.068	115.031	114.881	134.852
182	0.7	0.1	0.7	846.837	1059.19	1102.7	1102.7	1102.47	1077.91	1012.64	927.007	850.491	782.757	705.645	654.282	593.919	557.172	527.518	527.461	506.322	448.986	366.2	307.628	275.393	249.567	286.385	505.272	888.126	1055.97	1102.7	1102.7	1102.7	1102.23	1068.03	997.558	938.729	886.55	883.046	1004.1	1102.69	1102.7	1102.7	1102.7	1102.7	1102.7	1097.17	1058.67	1006.26	953.544
7311	1		5	735.093	731.32	729.464	735.427	732.052	726.44	718.19	709.562	701.782	695.611	690.686	686.343	681.612	677.063	672.524	667.599	663.619	662.176	656.508	650.061	643.464	638.488	636.687	633.277	629.241	626.251	624.487	621.511	620.559	636.335	643.432	637.407	631.299	625.939	621.802	618.659	617.058	619.379	618.899	632.925	637.475	635.966	630.166	622.32	616.602	613.156
1755	0.6		1	196.459	218.879	281.241	338.531	336.771	326.058	308.539	285.511	260.23	233.5	207.288	186.598	167.356	221.215	246.74	252.919	257.357	334.447	343.264	331.083	317.607	301.4	287.69	310.814	401.835	498.438	550.463	572.069	570.777	539.498	498.049	454.383	459.231	416.666	371.033	370.859	386.721	403.673	391.202	396.296	536.332	640.515	613.492	571.801	529.801	492.877
1192	0.45		7	794.816	801.783	803.013	806.629	808.41	803.374	792.322	780.277	769.978	767.998	768.693	770.695	769.486	769.677	768.501	765.383	767.527	774.105	767.688	757.395	753.28	753.434	757.363	757.147	757.798	762.201	760.796	758.219	756.556	750.313	742.493	733.442	723.804	721.337	724.459	739.476	746.229	753.234	756.998	756.648	754.28	751.305	745.987	736.667	726.989	721.386
541	0.15		0.85	88.2412	88.3561	88.1851	86.8655	85.3489	85.6415	102.53	91.606	90.813	90.9768	91.3394	91.2398	91.2347	91.154	91.2212	90.9966	90.9022	95.9431	90.778	91.0497	91.1641	91.3243	91.2169	91.3226	91.2192	91.3436	91.1512	90.5316	112.516	175.876	200.135	149.088	102.616	89.7337	90.1837	90.3202	90.1715	90.1602	90.1109	89.6972	90.3387	144.038	197.051	180.566	132.067	91.4007
1716	0.5		9	616.076	618.028	621.31	623.35	618.485	611.424	604.078	594.529	587.696	585.471	587.904	592.437	591.927	594.113	593.215	590.639	592.353	595.852	589.382	584.003	579.735	576.193	578.172	580.991	587.665	600.7	602.255	601.438	596.113	595.156	589.028	579.271	577.074	577.371	577.713	593.498	601.767	604.629	604.719	609.236	621.036	620.455	610.961	598.174	589.387	593.307
1883	0.35		2	226.79	230.429	235.504	242.039	236.383	230.907	224.613	215.59	206.472	204.9	203.155	202.2	198.855	201.826	203.683	200.181	195.116	193.214	187.46	187.215	183.03	178.98	178.398	179.24	189.548	194.359	194.389	192.76	193.164	191.284	186.575	185.587	180.343	178.546	177.348	180.071	189.069	195.362	201.933	208.525	205.91	201.841	196.498	189.975	188.134	183.931
895	1		0.45	488.147	486.444	483.274	482.733	478.496	473.548	464.582	459.013	459.678	459.732	462.88	462.591	459.821	457.472	454.122	454.07	452.628	450.215	446.75	443.837	442.207	442.879	443.943	445.065	444.801	443.928	440.899	440.935	441.526	444.284	439.929	433.054	430.17	435.791	441.571	446.385	450.093	450.618	451.319	454.913	453.998	451.277	447.716	441.6	437.026	437.593
1093	0.05		3	52.2971	52.4922	52.2325	51.9384	54.0328	53.2438	52.2592	51.5563	51.0944	52.8234	52.5523	52.9098	52.5361	52.5212	52.8529	52.3685	54.8295	61.9873	60.2363	56.0783	52.7413	54.7903	55.3097	52.5151	52.7299	60.7745	60.3085	55.9938	57.8699	65.7725	61.0599	54.9486	52.4162	52.2958	52.8173	60.4519	58.7555	54.8439	53.0827	52.554	59.8922	60.9767	57.3173	52.7053	52.0744	52.1924
1709	0.55		8	502.388	502.541	503.072	503.613	503.664	503.17	502.796	502.423	501.934	501.419	501.121	501.156	500.986	501.08	501.535	501.778	502.06	503.038	502.66	502.175	501.841	501.513	501.489	501.587	502.066	502.977	503.866	504.291	503.723	503.969	503.747	503.248	502.634	502.148	502.079	502.453	502.41	502.534	502.694	503.213	503.704	503.56	503.05	502.506	501.613	501.187
1017	0.3		0.95	50.366	51.9909	56.2908	65.406	65.6254	62.8085	56.7776	51.2854	50.5321	50.62	50.4767	50.5159	50.5348	50.5253	50.4506	50.5374	59.1956	73.5723	78.3597	83.9026	78.0037	71.4747	73.7707	72.2618	71.6732	103.885	120.552	127.455	133.665	129.545	118.233	107.526	119.562	115.415	103.965	165.779	203.144	198.433	188.155	193.387	260.834	253.496	220.838	184.801	148.709	114.72
[truncated: 434 more columns]
