# Supplementary material for: The value of observed reservoir storage anomalies for improving the simulation of reservoir dynamics in large-scale hydrological models
Source: Copernicus journal article supplement (doi:10.5194/hess-29-4073-2025), 2025-09-03
Supplement: Supplementary file 3 [file CH_results_calibrated_against_outflow.xlsx]

## Sheet: Readme
	Sheet name	Note	Inflow source	Total number of reservoirs	Number of reservoirs where downstream demand is taken into account
	Outflow(WG inflow-No Demand)	Simulated outflow (×106 m3/month) where downstream demand is not considered for irrigation and supply reservoirs.	WaterGAP	100	0
	Storage(WG inflow-No Demand)	Simulated storage (×106 m3) where downstream demand is not considered for irrigation and supply reservoirs.	WaterGAP	100	0
	Outflow(WG inflow-With Demand)	Simulated outflow (×106 m3/month) where downstream demand is considered for irrigation and supply reservoirs.	WaterGAP	21	21
	Storage(WG inflow-With Demand)	Simulated storage (×106 m3) where downstream demand is considered for irrigation and supply reservoirs.	WaterGAP	21	21
	Outflow(OBS inflow-With Demand)	Simulated outflow (×106 m3/month) where downstream demand is considered for irrigation reservoirs.	Observed	35	2
	Storage(OBS inflow-With Demand)	Simulated storage (×106 m3) where downstream demand is considered for irrigation reservoirs.	Observed	35	2

## Sheet: Outflow(WG inflow-No Demand)
grand_id	a1	a3	1980-01	1980-02	1980-03	1980-04	1980-05	1980-06	1980-07	1980-08	1980-09	1980-10	1980-11	1980-12	1981-01	1981-02	1981-03	1981-04	1981-05	1981-06	1981-07	1981-08	1981-09	1981-10	1981-11	1981-12	1982-01	1982-02	1982-03	1982-04	1982-05	1982-06	1982-07	1982-08	1982-09	1982-10	1982-11	1982-12	1983-01	1983-02	1983-03	1983-04	1983-05	1983-06	1983-07	1983-08	1983-09	1983-10	1983-11
610	1	4	2204.19	4583.12	3663.81	2124	3935.16	4905.99	2053.4	1500.43	1484.12	1556.25	1510.86	1555.91	1541.14	1378.83	1864.78	1614.93	1428.72	1316.6	1278.48	1238.25	1198.3	1238.25	1198.3	1238.25	1238.25	1118.42	1238.25	1198.3	1238.25	1198.3	1238.25	1160.26	1122.83	1160.26	1122.83	1160.26	1160.26	1047.98	1160.26	1122.83	1160.26	1122.83	1160.26	1206.22	1167.31	1206.22	1167.31
753	0.8	2	1661.04	1500.29	1661.04	1607.46	1661.04	1607.46	1660.48	1660.48	1606.92	1660.48	1606.92	1660.48	1660.48	1499.79	1660.48	1606.92	1660.48	1606.92	1551	1551	1500.97	1551	1500.97	1551	1551	1400.9	1551	1500.97	1551	1500.97	1825.15	1825.15	1766.28	1825.15	1766.28	1825.15	1825.15	1648.53	1825.15	1766.28	1825.15	3006.09	2044.26	2024.12	1958.83	2024.12	1958.83
870	0.8	0.05	2089.82	1887.58	2089.82	2022.41	2089.82	2022.41	2089.82	2088.6	2021.23	2088.6	2021.23	2088.6	2088.6	1886.48	2088.6	2021.23	2088.6	2021.23	2088.6	1937.35	1874.86	1937.35	1874.86	1937.35	1937.35	1749.87	1937.35	1874.86	1937.35	1874.86	1937.35	2269.42	2196.22	2269.42	2196.22	2269.42	2269.42	2049.8	2269.42	2196.22	2269.42	2196.22	2269.42	2429.45	2351.08	2429.45	2351.08
597	1	3	1290.56	1165.66	1290.56	3174.76	6398.19	3648.5	1333.11	1290.56	1248.93	1290.56	1248.93	1290.56	1290.56	1165.66	1290.56	1248.93	1290.56	1248.93	972.994	972.994	941.607	972.994	941.607	972.994	972.994	878.833	972.994	941.607	972.994	941.607	897.633	897.633	868.677	897.633	868.677	897.633	897.633	810.765	897.633	868.677	897.633	2244.91	1587.53	1291.82	1250.15	1291.82	1250.15
307	1	5	404.586	365.433	404.586	391.535	404.586	391.535	404.469	404.469	391.421	404.469	391.421	404.469	404.469	365.327	404.469	391.421	404.469	391.421	627.139	627.139	606.909	627.139	606.909	627.139	627.139	566.448	627.139	606.909	627.139	606.909	898.588	898.588	869.601	898.588	869.601	898.588	898.588	811.628	898.588	869.601	898.588	869.601	664.459	664.459	643.025	664.459	643.025
1753	0.05	4	9648.82	8562.81	20272.1	10920.6	4759.64	3160.96	2284.86	1887.04	1574.33	1772.24	1558.8	2111.39	2116.61	6450.85	5206.62	4749	7470.81	2811.72	2019.55	1031.66	1282.2	997.953	960.896	1775.59	12965.7	12296.1	8774.19	5600.23	3665.16	2550.82	2223.97	2000.01	1991.7	1548.82	1619.8	12455.4	9193.03	9847.37	7689.42	11733.7	11793.5	4692.45	2757.23	2168.64	1676.37	1578.82	2292.39
297	0.55	0.8	1425.3	1286.92	764.794	902.029	1466.42	1405.4	1433.02	490.107	472.12	483.998	469.905	483.648	484.91	438.801	482.836	475.156	513.475	1095.79	1998.05	1439.5	1392.49	1439.66	1389.44	1435.62	1432.88	1046.19	351.835	600.863	1417.77	1418.25	1444.81	322.056	316.286	323.162	307.096	317.596	317.149	286.468	319.44	317.338	333.191	326.567	334.678	1398.42	1351.05	1394.82	1354.55
1036	0.45	2	481.153	577.827	599.323	525.717	459.196	263.98	245.554	237.029	223.522	227.266	234.46	268.316	251.768	288.629	283.952	250.124	306.034	285.213	237.954	225.878	208.444	247.93	304.759	313.452	541.738	692.635	294.896	244.071	231.82	476.981	486.993	495.261	466.769	465.577	589.066	1558.73	586.02	508.339	554.376	745.265	763.33	478.622	469.959	454.075	428.866	462.215	883.059
989	0.35	1	373.928	889.34	1191.99	1152.8	552.088	397.242	294.4	247.96	207.476	190.302	198.383	319.199	239.007	357.479	366.611	286.296	736.716	2184.91	988.984	653.539	433.789	420.683	1035.13	779.417	777.665	1595.31	850.1	603.623	851.932	1357.76	753.312	635.363	553.216	403.059	394.633	1391.67	670.021	835.459	772.158	2985.88	1668.65	732.634	570.471	424.817	342.091	773.553	1376.85
1135	0.45	3	136.703	198.723	167.756	139.455	318.591	262.238	124.013	92.383	297.119	340.59	253.979	488.52	181.291	166.386	472.574	235.491	324.114	360.928	217.388	177.832	145.92	1860.5	603.417	447.952	370.711	611.642	484.486	333.952	1645.44	1348.5	804.832	501.06	367.205	308.572	252.71	303.37	353.206	819.333	646.778	567.372	587.23	426.603	291.447	209.856	162.754	1525.97	707.205
1269	0.2	6	839.92	845.381	596.039	1152.19	879.557	438.71	303.112	234.229	187.864	178.099	167.822	173.115	169.184	188.235	227.899	197.696	213.138	494.338	256.278	186.703	168.278	158.494	179.172	182.051	209.4	353.925	280.763	571.892	452.357	264.338	225.646	186.641	154.044	153.388	241.159	1661.17	852.002	1407.07	939.115	636.155	705.883	496.275	360.845	264.766	208.937	186.52	169.264
1077	0.6	3	204.641	360.3	264.046	289.213	865.286	403.786	248.912	187.204	145.976	132.238	113.922	161.175	105.756	118.535	233.923	153.207	158.441	244.011	141.461	146.865	115.099	469.775	700.967	422.776	381.139	1214.06	488.616	333.842	1461.26	1215.53	537.797	387.355	285.948	229.493	187.154	413.619	342.002	949.984	634.692	715.02	857.255	571.056	366.349	261.89	192.223	1168.1	412.863
1026	0.55	3	223.946	469.496	431.632	291.263	195.455	214.525	132.078	114.33	99.6015	99.5036	145.137	264.703	167.666	282.271	250.904	164.291	346.758	404.102	185.031	244.546	135.306	255.147	386.881	281.538	670.17	871.389	242.443	158.079	127.56	182.8	126.69	192.829	125.715	101.691	297.473	1751.51	306.363	292.954	229.312	624.594	641.378	200.423	171.872	145.139	124.649	288.579	568.336
740	0.05	0.05	31.1193	28.1077	31.1193	30.1154	29.6938	28.7359	29.6938	29.6938	28.7359	29.6938	28.7359	29.6938	29.6938	26.8202	29.6938	28.7359	27.9708	27.0685	27.9708	27.9708	27.0685	27.9708	27.0685	27.9708	27.9708	25.2639	27.9708	27.0685	34.1054	33.0053	34.1054	34.1054	33.0053	34.1054	33.0053	34.1054	34.1054	30.8049	34.1054	33.0053	34.6118	33.4953	34.6118	34.6118	33.4953	34.6118	33.4953
1294	0.35	6	52.0965	49.1918	50.6283	53.5447	93.1787	54.3761	47.2982	25.741	64.5524	79.2458	103.67	118.124	109.967	104.605	281.411	209.485	195.21	549.424	214.879	193.067	172.245	207.694	201.129	177.619	171.155	160.313	162.106	100.903	119.937	92.2863	88.38	82.625	74.7475	74.3227	71.3053	88.3522	109.257	188.935	227.397	117.025	119.935	100.608	86.3204	76.6869	66.6492	64.924	60.7931
1848	0.2	0.05	261.715	142.327	539.501	265.691	140.128	125.98	59.8504	15.6453	11.5268	19.13	203.851	135.512	72.1294	212.722	170.717	112.596	23.8149	45.895	22.1141	15.3246	12.6577	11.7199	11.4973	35.6412	224.583	126.694	73.5355	174.335	218.181	202.331	203.691	144.021	19.4344	20.0971	132.827	727.523	316.017	318.912	283.302	419.668	332.143	128.832	122.212	115.523	43.6427	17.6508	180.782
1869	0.1	2	323.334	292.044	323.334	312.904	323.203	312.777	323.203	323.203	312.777	323.203	312.777	323.203	323.203	291.926	323.203	312.777	39.3992	38.1282	39.3992	39.3992	38.1282	31.3923	10.6759	15.3784	38.2553	35.5864	39.3992	38.1282	189.444	183.333	189.444	189.444	183.333	189.444	183.333	189.444	195.125	805.52	516.973	869.451	875.946	341.429	352.81	352.81	341.429	352.81	341.429
1863	0.75	3	115.352	104.189	470.711	126.441	115.352	111.631	115.352	115.352	111.631	115.352	111.631	115.352	115.352	104.189	115.352	111.631	95.2212	92.1495	95.2212	95.2212	92.1495	95.2212	92.1495	95.2212	95.2212	86.0062	95.2212	92.1495	100.615	97.3697	100.615	100.615	97.3697	100.615	97.3697	100.615	100.615	90.8783	100.615	97.3697	111.881	108.272	111.881	111.881	108.272	111.881	108.272
1770	0.4	3	288.531	242.69	403.274	154.836	91.7415	63.078	54.1762	45.3848	37.9812	34.4183	31.8328	42.2585	64.0692	268.613	111.736	135.663	66.4072	108.336	52.5868	44.0575	36.986	34.1767	39.953	183.638	364.393	310.073	286.851	94.635	66.8875	52.0283	44.0613	38.1781	33.5875	29.2465	56.4133	335.401	161.693	203.757	108.319	147.984	188.664	80.6143	55.4662	45.2833	36.3471	32.7048	35.2385
965	0.15	5	133.483	113.419	332.424	360.34	156.577	93.5321	40.2089	33.8937	31.0845	33.4429	34.6116	39.9565	34.223	35.8213	56.3048	46.6812	98.1916	28.5559	21.2711	51.1191	39.3156	30.5654	36.7148	84.4737	56.11	187.978	307.815	120.227	440.5	225.984	142.436	85.4219	69.8469	61.1337	50.4185	52.3205	84.814	135.371	376.077	440.594	194.399	225.348	100.767	51.6326	39.9625	42.8654	59.2534
1247	0.25	4	65.2207	79.5702	66.1171	60.6556	101.833	63.1617	41.1465	33.66	214.853	292.178	191.611	318.812	112.125	90.4869	203.838	119.417	103.056	94.0004	97.9676	94.4388	86.8842	956.055	181.287	171.789	154.426	181.774	175.778	129.487	477.967	354.99	208.708	148.25	121.083	109.567	96.0031	104.597	117.22	153.565	149.311	136.184	107.95	118.869	84.4488	72.8238	63.971	63.1765	62.1049
7313	0.25	3	371.37	353.457	451.837	533.448	575.574	671.236	372.286	309.609	345.666	379.58	374.526	388.26	382.062	372.754	458.473	470.676	742.853	586.397	378.795	320.327	308.906	371.263	379.866	421.84	409.599	454.175	673.755	851.79	1438.81	1109.29	454.775	370.985	378.503	448.734	424.515	462.996	490.701	437.539	689.285	613.965	677.725	570.218	428.428	371.435	366.683	431.241	443.933
1287	0.5	3	708.274	705.699	529.85	471.954	526.908	386.289	310.911	237.603	205.565	450.925	241.349	348.67	228.901	219.984	337.876	293.342	367.253	1569.54	612.485	387.395	328.138	1281.07	956.8	630.359	422.862	653.985	522.147	503.744	1249.85	897.444	574.677	435.321	352.035	344.235	385.319	1181.65	617.051	1123.97	1207.02	676.641	844.568	534.26	423.209	356.384	284.174	258.519	242.448
1186	0.15	7	110.481	160.283	177.456	171.732	83.307	80.6197	83.307	56.7025	22.5735	22.8422	24.9921	22.8422	20.4237	19.6175	30.098	27.4107	8.977	8.94717	9.24541	9.24541	8.94717	9.24541	8.94717	9.24541	9.24541	8.35069	9.24541	8.94717	201.036	194.551	201.036	66.7957	19.4551	20.1036	19.4551	195.199	201.036	181.581	201.036	147.858	8.44017	8.94717	9.24541	9.24541	8.94717	9.24541	8.94717
1042	0.5	7	30.8601	72.2624	73.735	45.9317	9.15849	8.06323	7.28216	6.52233	5.78389	5.58281	5.47765	5.75471	6.43284	10.2789	10.4734	8.5839	65.8547	64.5623	35.1143	13.1941	5.85317	17.7438	15.0487	16.1073	69.4104	98.5702	67.0309	61.6244	63.7456	64.2452	22.7309	13.4039	5.93171	7.86505	28.7234	172.927	68.9506	62.6653	68.5877	87.4138	111.844	97.3937	98.5365	88.6601	14.8715	39.8693	150.576
884	0.05	0.75	2747.85	2505.31	2852.1	2737.3	2747.8	2735.97	2747.09	2044.99	1972.98	2038.84	1973.12	2039.13	2039.42	1841.92	2040.04	1974.7	2040.04	1973.78	2039.28	2545.35	2460.63	2173.48	1869.9	1951.91	1951.9	1707.89	1973.84	1956.43	1977.03	1890.02	1963.68	2111.04	2044.4	2112.63	2043.62	2110.84	2110.21	1905.05	2118.72	2057.5	2128.55	2049.32	2115.02	3150.77	3048.9	2783.82	2407.53
1273	0.2	9	21.7989	28.2832	20.9316	20.4072	56.9284	16.6073	0.937581	0.408274	1.30175	5.67231	5.61373	24.3277	11.4221	11.3494	25.1258	14.4449	12.0503	23.1184	154.721	63.8263	14.5229	85.1703	33.6969	34.135	34.3439	60.9611	68.4916	49.0439	167.615	84.9547	20.3802	15.514	11.9789	10.5373	9.08688	10.2015	14.343	18.3783	23.8802	17.5265	14.5368	11.5842	164.907	82.6875	15.6799	16.1834	15.6507
961	0.05	8	0	0	0	0	0	0	0	0	0	0	0	0	0	0	0	0	0	0	0	0	0	0	0	0	0	0	0	0	0	0	0	0	0	0	0	0	2.64136	2.83635	4.24427	45.2341	58.202	53.4134	44.7304	28.5671	14.5003	18.389	117.651
1144	0.1	1	1304.81	1534.35	1127.65	1105.59	1247.4	840.84	472.118	367.592	341.735	1115.96	714.655	1067.76	680.726	676.376	837.043	657.557	730.592	1548.6	2246.11	1592.58	592.179	2114.05	1872.93	1250.85	1046.47	2398.14	1453.63	1005.84	2441.06	2953.83	1426.3	1009.57	846.087	812.94	828.16	3439.37	1422.07	1698.86	1600.1	1218.88	1608.45	1181.84	2334.41	1711.76	676.51	731.005	662.293
616	0.85	4	1694.72	3403.55	3820.72	2801.46	3123.05	4180.6	2989.54	997.724	966.153	1020.75	1651.42	1708.58	1709.15	1542.56	1702.46	1617.1	1645.25	1570.26	1632.95	2805.11	2385.4	1662.97	1573.06	1582.41	1664.03	1474.23	1664.12	1573.33	1581.68	1490.53	1661.69	672.523	656.646	679.403	1077.45	1313.04	1312.73	1183.94	1305.95	1241.5	1245.12	1191.48	1240.23	2654.94	1952.04	1344.7	1259.46
911	0.15	0.6	457.251	436.777	641.516	696.113	395.829	389.005	55.854	63.1925	61.154	63.1925	61.154	63.1925	63.1925	57.0771	63.1925	61.154	63.1925	61.154	1446.78	144.678	140.011	144.678	140.011	144.678	144.678	424.699	1278.76	1064.08	1110.75	938.071	216.029	216.029	209.06	216.029	209.06	715.296	688.579	1399.2	2056.34	2400.67	1373.9	998.527	2165.12	1473.68	460.961	467.946	1089.54
1006	0.4	5	32.6835	85.9647	80.2146	50.5006	34.9437	26.1883	22.5888	19.5031	16.728	17.7943	17.2328	26.2775	20.8608	45.0451	33.4611	25.1924	62.4142	118.785	39.2533	31.2085	23.8707	70.6814	74.4132	55.5987	120.503	94.5955	44.34	32.981	31.0607	54.6051	24.6341	75.5519	25.252	20.4986	45.2947	187.454	36.7729	40.2899	36.267	174.916	96.8673	36.2352	29.7199	23.9212	19.4743	145.372	149.948
1048	0.15	2	401.329	750.164	902.952	1664.18	1476.57	1048.87	65.1833	69.2014	66.9691	69.2014	66.9691	315.264	328.098	293.311	332.329	293.987	253.313	275.144	2258.3	178.877	157.48	169.963	453.211	376.695	313.528	829.624	649.849	396.833	976.163	1468.69	59.1561	69.2014	66.9691	69.2014	66.9691	235.79	304.599	521.52	788.787	1154.44	925.23	919.051	2722.68	540.992	459.799	544.444	677.64
1123	0.95	5	69.6886	85.8963	49.3978	45.3637	55.0595	31.7072	27.2623	23.4375	84.5275	56.5363	33.6759	70.1954	38.5415	61.3443	53.1314	35.4073	63.9313	100.019	40.5127	30.0697	24.276	24.2658	36.6413	25.1586	108.877	93.7079	58.6069	43.2609	171.902	73.364	41.2027	32.7921	25.9951	22.6031	23.0961	237.315	37.6132	66.2044	89.1982	45.6268	168.643	38.796	37.2721	26.6982	21.5804	19.2485	19.455
1032	0.4	2	132.456	122.363	410.791	327.759	214.136	170.434	23.5997	30.7392	29.7476	30.7392	29.7476	30.7392	30.7392	27.7644	30.7392	29.7476	30.7392	29.7476	567.395	106.158	71.3819	56.7395	269.055	172.049	155.576	347.758	188.522	137.273	386.195	549.092	276.637	260.574	131.18	116.009	99.054	164.198	244.512	249.866	276.637	267.713	276.637	267.713	827.072	370.848	128.063	298.813	200.098
1774	0.4	0.85	595.79	529.762	659.637	590.384	592.017	124.869	125.934	122.608	116.635	119.018	114.236	117.359	117.587	129.534	142.452	144.817	132.496	396.36	391.205	387.805	373.376	305.901	81.6051	117.732	353.528	447.097	460.982	395.313	397.659	349.968	356.95	355.732	350.253	354.644	260.331	398.299	388.369	380.775	395.048	394.265	394.028	400.353	405.923	402.392	386.732	375.058	107.563
1781	0.25	0.85	938.959	699.8	1763.58	990.036	452.219	235.146	173.963	113.566	86.9755	66.9596	75.4229	89.874	142.641	850.25	716.406	629.26	244.434	280.649	124.208	76.5332	54.9026	45.3288	35.3428	91.2373	910.785	1391.35	1141.63	616.789	523.407	230.581	154.185	180.497	92.0501	90.6729	207.762	974.412	704.605	1495.43	1447.81	1415.7	599.462	310.727	194.771	130.301	100.891	79.0384	152.549
355	0.4	4	218.903	133.175	190.72	342.92	385.372	230.477	130.28	126.183	120.792	131.813	173.355	181.43	167.271	159.231	193.32	266.879	449.255	189.96	217.34	211.896	203.63	209.503	200.399	164.889	138.623	150.212	199.788	313.123	380.759	298.704	98.2261	92.9291	70.06	38.913	148.399	160.364	169.639	167.738	193.078	331.497	1021.85	529.42	310.764	299.285	315.006	343.768	343.144
1101	0.4	3	133.244	120.349	133.244	128.946	133.244	128.915	133.212	133.212	128.915	133.212	128.915	133.212	133.212	120.32	133.212	128.915	133.212	61.0388	63.0734	63.0734	61.0388	63.0734	61.0388	63.0734	63.0734	56.9696	63.0734	61.0388	63.0734	82.8472	85.6088	85.6088	82.8472	85.6088	82.8472	85.6088	85.6088	77.3241	85.6088	332.269	425.39	163.203	168.644	168.644	163.203	168.644	163.203
1023	0.05	2	283.189	518.431	561.211	1139.21	1091.46	867.984	71.0339	66.2262	58.8705	56.4308	51.6824	52.6449	50.7395	45.3222	50.1478	47.6926	158.209	178.55	996.957	732.569	95.089	97.6093	96.1904	98.8514	98.6595	90.9868	128.567	124.943	99.2691	216.046	33.4064	36.9391	29.9975	26.1774	22.8227	23.2277	26.2066	32.8393	57.4954	189.812	94.394	323.339	1020.29	956.54	214.902	188.445	184.99
1060	0.55	5	36.5971	51.0182	70.1859	37.2692	33.0588	29.5038	26.815	25.0281	23.1259	23.2095	23.4446	50.4963	27.5372	44.2584	48.6938	33.1737	53.8153	49.0797	31.6295	37.3016	27.7267	41.1042	64.2941	47.1254	90.9665	74.3766	36.855	29.5374	28.7177	49.4568	36.2097	33.8152	30.9387	30.7367	69.7827	181.584	61.6231	55.5156	43.2478	65.7785	92.9693	41.5434	45.7354	43.1609	39.9764	41.4797	79.0428
1864	0.1	2	274.063	175.587	811.486	285.216	113.05	59.884	38.4955	24.3899	17.9035	32.8287	66.8436	113.166	82.1317	130.023	133.105	96.2706	56.0909	42.9457	29.1596	18.7764	14.556	12.9027	11.9889	17.718	180.169	198.536	129.898	327.338	102.114	55.4203	36.2298	58.4736	62.2135	92.5313	139.525	1141.55	274.331	357.635	239.024	522.276	455.302	101.491	60.1106	34.7658	23.775	22.489	132.301
1797	0.65	0.8	3729.85	2784.25	5541.21	2835.84	1558	1189.89	1067.71	951.004	858.834	845.812	824.068	928.686	1028.22	2715.82	1933.02	2178.41	2294.5	1235.58	575.78	470.434	453.085	455.009	361.8	822.017	3206.57	4181.06	3300.48	1389.52	1310.16	1211.39	1070.81	1110.28	1018.86	975.996	1267.14	3501.7	2333.5	3639.84	2995.46	3450.55	2412.48	1352.22	1084.72	945.589	813.436	813.753	887.669
305	0.85	0.1	1695.6	1282.47	1763.12	2144.9	3664.05	3511.77	1130.66	677.228	1296.59	1423.6	1790.77	2357.97	1830.59	2110.94	1746.3	2200.45	2819.56	3184.67	3035.51	1011.7	1004.6	1562.11	1602.17	2123.99	1449.24	2875.71	3076.2	2905.32	2972.48	2750.2	1157.71	645.092	1101.51	1905.02	1759.57	1954.91	2380.07	1849.74	2125.08	1734	1904.36	1716.53	3606.53	1363.9	1366.95	1363.1	1928.16
968	0.05	7	45.3037	46.7946	88.1688	445.58	235.096	117.55	13.1664	18.4935	18.1854	19.2573	18.4212	18.8202	18.5306	16.6439	18.5847	17.778	35.8343	17.9892	539.138	132.536	68.0253	54.1168	52.3608	69.8303	54.1062	49.0453	86.9405	68.3603	137.384	101.543	17.6902	15.5795	13.8249	13.7735	12.5871	12.4649	12.7194	13.6699	28.2692	35.4192	24.3474	40.0595	573.995	156.373	55.2913	73.8217	72.1736
1019	0.1	0.05	19.7255	47.0363	68.0494	32.121	18.3045	14.3692	13.0888	12.028	11.0608	11.1348	10.6685	11.0888	11.074	22.595	23.8086	18.0744	47.991	41.0297	17.7443	16.2257	12.8091	11.8812	10.925	10.807	55.7871	108.224	47.4049	24.155	16.7275	13.3745	12.1319	11.0294	10.533	10.7066	11.0527	225.993	30.9099	29.2737	36.4604	124.837	57.6884	16.3482	13.6325	11.8783	10.6359	10.8014	38.2788
1302	0.05	7	22.5853	19.7443	21.0751	17.5883	19.9494	13.3158	12.3004	16.5284	30.1309	37.9802	42.3538	39.5251	40.9121	35.617	74.0147	47.6096	39.9658	244.662	35.7216	28.1581	25.5146	28.7652	27.3121	24.7304	22.2785	21.9525	20.7959	17.4422	22.488	13.8234	15.3459	16.1116	15.9479	16.8429	17.1503	21.0367	27.2467	42.5455	58.0638	23.1483	19.794	17.9034	17.7533	17.6904	16.6504	17.6777	17.242
1824	0.2	1	8367.68	6984.76	17195.3	8224.31	4722.54	2833.01	2265.78	1927.24	1628.65	1874.76	1778.89	1865.72	2172.7	6492.71	4520.81	4617.64	2532.14	2385.87	1386.22	1056	839.232	751.842	654.7	1957.53	11071.1	9526.95	7335.56	4657.57	3235.88	2572.97	1934.18	1837.34	1573.86	1452.16	1497.02	10902.9	6306.37	8303.57	6768.75	9736.18	7974.98	3548.22	2523.46	2029.99	1500.75	1309.88	2171.54
1316	1	0.05	0	0	0	0	0	0	0	0	0	0	0	0	0.111258	0.100491	0.111258	0.107669	0.854172	1.07669	1.11258	1.11258	1.07669	1.11258	1.07669	1.11258	2.36451	2.13569	2.36451	2.28823	2.36451	2.28823	2.36451	2.36451	2.28823	2.36451	2.28823	2.36451	1.47981	1.33661	1.47981	1.43208	1.47981	1.43208	1.47981	1.00723	0.143208	0.147981	0.143208
1835	0.9	0.5	7319.9	6072.48	14743	6444.53	3890.28	2466.78	1928.07	1627.56	1521.75	1492.14	1428.23	1526.65	1812.97	5700.03	3961.23	4127.82	2272.18	1892.95	1149.74	923.483	736.732	648.155	577.672	1844.59	9249.55	8892.52	6401.49	3606.01	2166.78	1781.74	1583.87	1510.72	1335.8	1240.68	1360.87	8239.72	4997.26	7039.05	5514.72	7505.45	7459.56	2860.39	1904.43	1607.16	1278.72	1128.85	2097.83
1847	0.3	2	6032.51	5021.74	11604.7	5312.42	2586.04	1770.09	1441.67	1234.44	1078.9	1039.79	1128.95	1362.74	1478.36	4957.97	3340.7	3607.68	2909.07	1778.94	947.66	824.892	619.822	559.9	509.083	1297.27	6895.02	7697.04	5623.83	2571.12	2031.34	1597.74	1409.91	1381.82	1252.54	1142.28	1387.41	6743.67	3948.73	5839.55	4492.47	5853.43	4287.02	2265.19	1662.75	1304.02	1145.26	1034.9	1415.12
1231	0.4	5	142.857	97.9126	68.9179	59.7936	55.1868	39.7352	29.7883	23.0626	18.3655	18.575	17.8077	19.1124	18.6025	16.8636	20.0433	20.5387	45.7096	279.592	63.6919	40.2686	31.7966	43.9317	86.2515	62.4351	54.105	65.2079	59.1113	47.2829	52.2701	43.0271	36.3108	26.837	20.1941	19.1998	24.4962	285.846	75.6624	161.551	94.0315	70.7284	58.1112	51.6849	41.4082	31.486	24.7403	22.0462	20.3952
1140	0.05	0.05	0.423396	0.382422	0.423396	0.409738	0.423396	0.409738	8.42932	0.894893	1.90526	1.1547	1.12583	2.97336	0.894893	0.808291	0.894893	0.866026	0.894893	1.38564	0.116093	0.423396	0.409738	0.423396	0.409738	0.423396	0.423396	0.222624	0.202138	0.0655581	0.423396	0.409738	9.56881	8.7354	0.926014	0.956881	0.926014	0.956881	2.62371	8.64279	9.56881	5.09307	0.956881	0.926014	0.0915082	0.423396	0.237648	0.361936	0.409738
1296	0.25	10	32.6555	20.2755	17.0247	14.1928	18.3654	12.3557	10.564	9.61005	8.72338	8.39409	7.63804	8.03076	8.44884	11.0849	11.4224	9.43147	9.06935	47.0391	12.9176	10.6205	9.22918	20.8839	29.5071	13.3153	13.0367	12.0276	13.0555	13.1814	34.7644	12.9543	10.9164	9.5433	8.70097	8.46196	8.98091	35.205	26.401	47.741	48.8142	21.83	49.5862	15.3517	12.8696	11.0289	9.45819	9.17495	8.27453
1659	0.05	5	21.093	34.3932	53.5954	31.8079	25.8628	21.8128	20.2215	19.1816	17.3125	17.0344	16.3242	17.1551	19.7013	37.331	22.3589	32.3539	46.6058	24.4743	22.1683	29.9508	33.9799	22.6472	20.4696	22.252	45.8914	66.2582	96.2584	37.2603	28.2895	27.175	24.9225	22.691	20.4463	20.1854	27.0257	61.4049	31.6134	31.0135	51.2732	42.222	46.9689	37.279	28.3702	25.4763	22.6084	33.6274	60.8929
1277	0.05	10	1.0765	0.972326	1.0765	1.04178	1.0765	1.04178	27.9784	10.1083	2.70758	2.79784	2.70758	10.1083	6.85921	9.02528	17.4188	14.8917	7.67148	23.8267	25.3565	6.21644	4.66233	4.00797	2.45386	2.53565	2.53565	2.29027	4.00797	4.66233	11.3695	4.66233	0.795224	1.0765	1.04178	1.0765	1.04178	1.0765	1.0765	0.972326	1.0765	1.04178	1.0765	1.04178	31.0491	28.3448	3.00475	3.10491	3.00475
1021	0.05	6	40.5293	201.339	169.962	227.487	111.129	5.76745	7.01142	7.01142	6.78524	7.01142	6.78524	7.01142	7.01142	6.33289	7.01142	6.78524	7.01142	97.6561	59.8958	10.0911	9.76561	10.0911	97.6561	89.1926	45.2473	91.1457	100.911	97.6561	100.911	113.624	117.412	117.412	113.624	49.2372	21.5886	18.5586	15.1499	58.3271	100.368	113.624	117.412	213.367	220.479	220.479	46.9408	34.85	34.1388
1280	0.6	7	25.5782	17.9422	19.8099	0.858653	12.4641	8.08901	2.74115	1.7145	114.253	62.3567	27.5754	44.093	38.8754	28.4231	44.7198	279.33	283.689	270.571	275.409	59.2495	34.4662	152.081	51.2205	51.8711	51.7341	49.4334	51.7721	12.474	18.3103	17.5236	16.7332	13.312	12.4768	12.6824	12.1051	12.4817	13.7065	16.0751	17.6284	88.4809	89.4637	86.8528	31.7338	16.2051	13.3148	18.7354	18.4882
1120	0.95	10	2.92816	2.7333	3.29783	3.20197	3.29147	3.1832	20.0382	4.81446	3.53243	2.45784	3.48285	2.9886	1.87839	2.23032	2.40396	2.86934	2.92031	2.85704	0.396504	1.14254	1.07967	1.13181	1.16876	1.29549	1.37166	1.46794	2.08036	2.454	18.1957	13.776	32.497	29.8028	27.3713	27.186	11.9458	8.79346	7.90116	8.46534	10.7371	10.6447	11.3907	9.57941	3.28071	2.96629	2.41229	30.4157	9.07235
182	1	0.95	111.596	514.392	225.568	124.305	111.596	107.996	111.596	111.596	107.996	111.596	107.996	111.596	111.596	100.796	111.596	107.996	45.3819	43.918	45.3819	45.3819	43.918	45.3819	43.918	45.3819	130.341	476.703	408.012	488.086	159.581	108.855	112.484	112.484	108.855	112.484	108.855	416.532	391.254	509.858	695.356	290.288	149.093	112.724	113.529	113.529	109.867	113.529	223.081
7311	0.05	7	13.5272	35.1426	58.1187	25.2254	16.149	13.4495	16.7998	11.3414	6.83441	6.1835	4.74164	5.10219	3.67504	3.15786	3.82044	3.54842	5.51344	16.3542	14.1998	11.1971	8.27358	8.43647	27.4728	16.0848	24.803	36.1013	26.4282	15.56	74.2134	63.8877	28.2368	18.2223	14.1522	13.7872	10.8	12.8162	17.1431	58.1729	43.6982	90.7001	39.5551	26.7673	15.6618	13.7265	11.2021	9.85392	10.282
1755	0.25	2	73.8591	89.8372	139.792	58.6987	44.2501	33.9845	31.0711	27.201	23.8193	22.7636	22.7093	29.3467	33.6882	123.494	56.7923	59.6061	42.1425	126.503	33.2505	28.3593	24.5943	23.4608	31.8022	85.0773	163.826	120.493	60.8067	63.3161	51.4504	38.0509	33.6526	33.15	76.4395	29.4127	29.5478	117.553	75.7538	86.0006	48.2835	124.144	246.264	66.3581	44.8359	38.228	32.5438	32.4856	122.798
1152	0.2	5	0	0	0	0	0	0	0	0	0	0	0	0	0	0	0	0	0	0	0	0	0	0	0	0	0	0	0	0	0	0	0	0	0	0	0	0	0	0	0	0	0	0	0	0	0	0	0
1192	0.05	3	260.938	325.489	254.157	260.214	280.369	144.219	119.291	100.628	89.4896	91.3838	89.1741	95.1757	95.4071	91.0154	105.481	100.306	94.0807	487.511	173.181	110.241	94.7155	95.5995	108.918	110.767	126.248	180.416	161.781	139.132	112.552	96.9791	77.4787	73.3905	58.9538	70.5253	82.0257	378.551	252.823	354.021	264.426	175.835	170.963	106.266	94.833	79.7808	69.4065	68.7995	66.3866
541	0.05	2	137.079	123.803	113.182	33.2245	522.754	438.055	137.261	137.189	132.729	137.128	132.686	137.086	137.064	123.787	93.2749	85.694	138.195	132.798	65.9002	65.8563	63.713	65.8362	63.7079	65.8229	65.8231	42.2501	14.224	42.9527	237.564	244.337	137.969	137.932	133.456	137.879	133.411	137.839	137.821	124.473	53.7877	33.3762	136.83	325.446	138.017	137.959	133.456	137.889	133.422
1822	0.35	0.5	5088.85	4061.91	8857.84	4305.6	2482.08	1712.87	1417.95	1190.15	1111.8	1028.29	1026.73	1233.51	1359.67	4255.62	2783.39	3129.62	1245.57	1417.08	763.864	608.784	508.974	462.95	428.668	1064.22	5017.79	6326.23	4818.69	2050.67	2563.1	1439.98	1299.32	1285.14	1163.81	1075.57	1410.17	5646.4	3283.45	4827.48	3854.38	4887.66	3298.79	1901.13	1362.13	1166.68	1029.02	934.783	1177.08
972	0.05	8	98.2078	101.758	183.4	177.484	183.4	177.484	153.876	153.876	148.912	153.876	148.912	73.4634	15.3876	13.8985	15.3876	14.8912	46.6592	46.1628	5.68514	5.85512	5.66625	5.85512	5.66625	5.85512	5.85512	5.2885	5.85512	5.66625	5.85512	5.66625	69.2857	69.2857	67.0507	69.2857	42.9124	6.92857	6.92857	20.3387	35.0899	67.0507	69.2857	67.0507	77.9031	77.9031	75.3901	77.9031	64.0816
613	0.05	0.85	156.103	209.966	250.045	440.923	1358.85	814.315	148.959	130.718	123.318	147.321	162.428	162.442	152.32	134.419	190.106	274.288	249.296	149.476	60.768	57.1583	54.8978	57.034	55.3565	51.3154	39.0819	64.5277	178.709	202.967	358.215	164.12	95.7458	89.3408	85.8482	88.6321	100.585	112.011	110.222	119.635	270.178	307.547	394.546	361.587	134.576	121.575	111.557	118.461	135.241
1086	0.75	1	0.867425	0.783481	0.867425	0.713462	0.737244	0.713462	0.737244	0.737244	0.713462	0.737244	0.713462	0.737244	0.737244	0.665898	0.737244	0.594372	0.614184	0.594372	0.614184	0.614184	0.594372	0.614184	0.594372	0.614184	0.614184	0.554747	0.614184	0.473276	0.489052	0.473276	0.489052	0.489052	0.473276	0.489052	0.473276	0.489052	0.489052	0.441724	0.489052	0.386243	0.399118	0.386243	0.399118	0.399118	0.386243	0.399118	0.386243
1295	0.15	10	68.3358	67.8563	42.3124	30.8943	34.4726	20.2571	14.9401	10.7128	9.09777	8.87836	10.6767	15.1414	24.1652	29.7248	19.9841	14.8555	24.9237	73.752	30.5702	17.8195	15.5215	18.4144	93.2194	27.9578	36.2488	29.5995	36.3303	75.6595	82.2874	31.4391	23.8261	17.5625	12.6459	14.5322	119.239	132.388	68.1535	135.313	115.382	33.5759	101.814	27.3429	23.5317	21.0993	19.6517	15.6063	14.0313
1139	0.15	9	5.32402	8.25365	5.88262	5.02547	5.497	4.352	3.92298	3.71032	29.945	10.1003	18.9145	24.9637	8.20788	19.6733	23.8096	11.2506	10.5053	11.7106	7.53914	6.43537	5.55767	76.4288	13.0218	10.2678	12.9958	14.0333	14.3109	9.6418	61.0254	47.9053	17.1156	13.4283	10.6364	9.18605	7.91324	14.3154	17.8456	16.6941	14.6898	12.7144	9.8098	8.70049	6.95611	6.04372	5.2146	11.2269	11.8297
1862	0.6	1	796.518	489.71	1575.09	616.491	278.299	168.451	145.173	126.399	65.74	106.166	134.363	121.289	111.19	618.364	236.96	248.101	185.603	224.57	123.417	55.9426	39.4673	34.2007	24.7907	79.7352	804.784	942.475	378.027	419.134	338.805	304.032	201.002	89.591	50.47	82.615	188.568	917.67	499.1	745.166	636.672	677.637	218.802	136.068	107.001	89.4323	80.3095	74.5547	351.611
629	0.05	0.35	2003.73	4196.97	4085.39	2075.8	3301.41	4751.71	2233.02	1303.12	1334.71	1740.17	1689.29	1746.55	1744.45	1570.73	1751.15	1609.4	1637.11	1566.68	1667.71	2381.58	1586.24	1593.99	1587.02	1669.63	1678.48	1447.95	1672.58	1511.31	1585.99	1504.95	1584.54	1257.66	1139.53	1178.36	1141.05	1435.87	1355.71	1294.05	1533.53	1246.55	1244.09	1192.61	1267.82	2351.4	1336.98	1537.51	1313.07
1000	0.65	3	22.2636	51.5151	41.3679	33.1535	24.3051	20.5342	19.3227	17.983	16.4483	19.2309	22.7387	32.3344	22.3603	38.6991	25.5263	20.3078	59.9266	68.3659	27.3731	23.0008	19.8839	23.3471	42.3162	39.1175	53.7035	53.4353	30.608	24.2688	24.4328	37.7367	25.0141	27.053	23.2459	21.8196	28.8107	106.515	31.1006	26.3463	27.0156	101.165	40.4577	30.0742	28.1111	26.217	24.0518	68.5681	71.9627
7306	1	10	7527.42	6267.17	15261	6856.04	4278.03	2517.1	1999.33	1726	1479.85	1591.6	1402.31	1702.82	1889.87	6025.36	4191.3	4325.41	1971.14	1999.32	1139.07	1012.65	741.205	681.233	593.851	1907.84	8972.95	8924.64	6791.47	3797.28	3266.5	1998.73	1737.86	1718.77	1450.71	1348.17	1487.76	8967.36	5297.49	7309.37	5796.6	8021.87	6533.54	3059.68	2037.63	1645.5	1305.58	1226.63	2012.78
991	0.1	1	79.2365	151.672	197.083	131.163	77.4174	54.9109	39.4546	29.6034	21.564	18.0005	14.2381	21.9003	13.4951	14.467	25.4816	17.3252	49.8894	56.8385	44.252	53.548	37.0465	39.7273	157.648	113.262	85.8071	139.571	102.888	65.2011	98.3713	180.388	77.32	55.7314	40.6133	32.2277	24.5703	20.6322	18.3339	51.5964	82.7574	353.951	121.762	98.9775	68.403	47.3377	34.2114	30.0314	56.8128
7317	0.15	4	139.585	135.354	343.062	69.4694	68.8328	41.5824	38.5181	32.9238	27.9329	25.9812	23.0442	24.0583	29.084	107.866	60.3298	52.0135	38.0154	32.7396	28.816	24.8143	21.3975	19.838	18.8978	50.3498	302.783	147.23	89.3232	63.9307	42.883	35.5883	31.6548	30.0156	28.3585	25.724	36.2208	238.027	87.4498	146.273	64.2303	206.077	220.419	51.2433	41.925	36.152	30.3892	27.8176	111.741
998	0.45	1	210.301	189.949	185.879	203.517	367.982	396.129	210.291	210.291	203.507	210.291	203.507	210.291	185.87	110.572	167.554	118.034	100.397	81.4028	1.95853	0.906183	0.876952	5.64172	8.76952	9.06183	9.06183	8.18488	9.06183	8.76952	9.06183	8.76952	25.2799	25.2799	24.4644	25.2799	24.4644	25.2799	25.2799	22.8335	25.2799	63.1196	144.595	58.492	226.602	226.602	219.292	200.287	120.611
1716	0.2	2	69.8835	99.3554	200.898	75.2058	44.1542	30.4804	26.0842	19.2836	14.7077	13.2882	13.5427	34.3976	27.2309	123.613	38.5022	33.447	209.181	70.3377	35.3236	28.7251	22.3891	18.5699	16.65	55.0621	265.517	295.787	107.421	64.6198	43.5159	42.8876	30.1847	21.6669	18.4946	17.4016	17.369	568.597	91.3911	94.7169	107.439	285.139	316.746	102.121	41.2489	33.6303	27.5017	174.776	303.802
1896	0.05	2	612.629	490.658	1181.97	499.945	330.947	247.402	212.94	187.579	181.92	216.334	184.953	175.731	154.744	543.442	300.709	244.593	569.487	333.574	178.821	179.85	140.266	139.539	120.659	176.426	527.498	740.534	387.783	518.688	230.314	210.766	194.234	184.715	138.883	167.361	139.529	470.425	375.162	408.792	497.963	389.13	742.515	448.127	199.155	196.363	247.279	170.03	293.737
1883	0.05	2	259.673	235.006	378.553	245.358	31.1393	23.4653	19.0653	15.5272	13.0177	12.5571	14.2774	17.9951	17.1543	113.198	33.8262	22.3274	166.853	158.922	148.134	20.7834	15.4332	15.8795	15.2953	25.8475	273.051	255.326	199.243	158.153	50.4834	43.4298	40.4905	37.9184	28.2146	18.7374	17.5988	71.294	99.0482	125.006	127.959	120.097	244.498	229.248	231.562	82.8281	28.4658	22.3681	56.6821
1285	0.05	9	4.16469	5.02923	6.08758	9.16258	35.6441	13.3013	5.46647	4.04033	4.12275	3.70036	4.07159	17.9164	10.3318	14.7168	19.8499	10.7114	10.1688	93.6054	20.4081	18.3798	17.2938	8.04491	6.83973	6.25813	5.54932	4.94191	4.99229	4.92291	18.3174	6.34931	4.98603	3.97228	3.06999	3.28813	3.17106	4.99911	12.5355	40.4912	34.4077	15.839	19.022	11.2382	4.43634	3.83611	2.99648	2.51647	1.98792
1266	0.45	6	13.7902	23.0045	16.7468	15.822	24.7775	14.5195	10.3065	8.38622	7.5601	6.80555	6.57434	4.45061	4.32303	4.16487	5.6149	5.18196	6.84131	10.1271	8.94575	7.02705	8.90967	8.88053	7.84045	6.82348	7.34539	7.76955	8.94549	10.2493	16.2179	9.48173	8.57253	6.76372	5.10471	4.23785	3.53205	28.9973	17.4059	70.5609	39.2392	17.6218	40.1131	20.5273	18.2233	16.9931	15.0403	14.101	12.5248
1176	0.05	9	5.04487	5.24447	4.92376	5.05436	12.9496	23.5031	37.1224	31.8261	262.319	56.4906	186.971	124.86	24.3205	22.9383	52.5017	27.2288	26.1598	32.3907	38.2639	27.6804	16.9975	54.4985	16.3241	15.7635	17.3301	23.1185	19.2878	12.626	134.918	152.928	69.4202	55.8148	36.2153	22.7712	14.532	12.6603	38.7743	80.0827	30.4972	21.7679	23.3461	34.9812	40.946	34.8811	17.9837	126.194	54.934
924	0.65	0.05	15.7309	23.1587	42.5905	28.3768	18.6991	29.5261	16.9611	16.0742	25.0709	21.521	19.0647	49.7862	24.7713	46.7304	25.5822	29.2613	22.3368	24.2346	93.3747	21.6143	17.0105	15.7215	20.8705	18.3681	15.0851	86.8927	87.2372	41.3184	58.353	46.3075	63.7027	31.7928	30.7132	30.111	43.6422	63.2552	37.4659	57.0818	53.6485	77.6815	32.6393	25.4469	22.2627	19.9446	18.3856	18.7477	86.6319
758	0.05	4	69.9351	63.1039	69.287	65.6525	65.4361	58.2945	59.1806	58.8504	57.4332	59.6441	58.2401	60.6586	60.8221	54.9852	60.6314	58.664	60.2413	45.8801	47.3798	47.1936	46.1506	50.3166	49.9281	52.454	53.3714	48.2086	53.15	51.7011	52.8777	54.2355	55.8199	54.9009	52.3102	56.4514	56.4283	58.6576	59.0692	52.7077	57.5716	54.391	53.9687	56.5102	58.2721	57.0389	54.8941	57.7267	56.8331
1257	1	10	0	0	0	0	0	0	0	0	0	0	0	0	0	0	0	0	0	0	0	0	0	0	0	0	0	0	0	0	0	0	0	0	0	0	0	0	0	0	0	0	0	0	0	0	0	0	0
895	1	0.5	2939.27	2671.34	3022.62	3136.37	3062.6	2894.12	2883.98	2299.82	2115.54	2192.09	2125.68	2195.91	2192.38	2037.32	2289.82	2214.07	2277.24	2182.82	2248.27	2309.91	2189.14	2061.56	1985.64	1995.32	1996.02	1958.62	2100.33	2195.22	2285.31	2345.02	2234.6	2245.69	2212.64	2334.24	2304.24	2349.26	2496.63	2288.87	2742.83	3249.68	3452.83	2894.4	2818.17	3021.9	2869.06	2892.3	2588.14
1317	0.3	7	4.18124	4.08407	4.58556	4.86856	55.9966	13.5528	5.12698	209.538	26.0248	20.9733	13.7466	25.9649	12.5537	8.75962	7.98331	7.12069	18.2551	75.6071	31.1355	18.9566	18.2766	44.7032	22.3602	13.2499	13.0581	11.6656	14.8426	11.2085	11.229	9.98256	9.6599	8.14881	7.23525	7.83459	7.23061	7.92684	5.27211	4.14403	4.26988	3.78444	3.14381	2.97158	6.44399	4.52601	3.6264	4.50789	5.74319
1242	0.25	7	9.82749	8.73562	8.78275	5.25267	4.87387	4.46096	4.33629	4.11069	292.023	161.744	42.236	45.4512	43.8737	35.6901	34.1376	29.7043	17.0198	6.74243	6.34458	20.8304	44.5741	15.5519	13.8853	13.3219	15.0951	10.6247	9.02157	4.59026	3.70339	3.19056	2.9837	2.74701	2.55025	2.50665	2.54343	11.8499	139.753	90.5092	21.8533	30.7946	3.40786	1.85887	1.1856	0.112418	0.0963302	5.55274	20.8492
107	0.85	3	105.403	61.4705	72.5855	53.1123	44.4067	40.0629	39.7584	38.6171	36.5235	37.0351	35.7558	57.5843	57.5235	64.5494	57.511	44.2968	32.2622	28.95	28.6853	27.8775	26.3645	26.7496	43.6085	156.028	90.0813	221.393	136.606	87.3384	55.4837	50.5402	49.9184	48.2198	45.4223	45.9384	46.1725	116.688	91.2877	179.18	216.283	67.7159	59.1551	50.3788	49.6888	47.9567	45.1604	45.6596	54.7945
1841	1	10	118.438	117.609	303.109	135.746	80.3406	64.2177	61.8452	58.5053	54.8646	54.7945	53.7993	55.1776	56.4103	114.163	80.9678	78.8243	36.1353	37.6208	32.2397	30.9335	28.7796	28.9939	27.9619	44.7185	150.072	153.829	67.9847	55.295	58.8656	52.846	51.818	50.5335	46.8835	47.6588	60.8995	149.505	80.7628	96.1067	83.4639	96.2405	84.015	58.8811	53.4442	49.9054	46.2782	45.9107	53.7316
907	0.05	0.7	256.031	216.286	289.425	240.742	169.662	125.301	38.3813	39.4228	48.3964	46.9419	42.0881	40.6479	37.3049	41.7399	46.2965	54.3992	44.1621	37.6639	490.175	71.7631	70.0207	71.7555	70.5572	71.695	55.3725	149.28	531.34	370.502	413.148	366.996	112.178	81.5801	65.9558	61.8683	93.6624	358.914	272.584	445.884	648.699	867.408	538.619	300.927	747.903	236.393	127.637	222.343	449.046
80	0.65	2	376.531	291.956	316.953	253.222	88.3475	77.6154	36.2978	33.7714	36.1878	38.412	129.908	336.444	80.1135	247.666	154.208	154.902	187.747	205.982	119.669	111.345	118.533	163.565	163.372	503.379	314.119	446.864	325.933	314.513	155.192	130.414	101.329	95.0989	107.318	152.241	188.96	373.807	384.387	410.032	380.769	181.687	196.029	163.947	159.795	116.342	108.386	101.26	278.419
1236	0.05	7	0.863006	0.779489	0.863006	0.835167	0.863006	0.835167	2.72821	1.72601	1.67033	1.72601	1.67033	3.73041	5.73482	5.06668	8.74142	9.18684	7.73922	7.18244	5.73482	4.73262	3.67474	14.2535	16.7033	17.2601	17.2601	13.5854	12.2491	10.6901	11.2469	13.1956	12.6915	9.98476	7.75924	7.27805	6.13521	5.11268	5.11268	5.47357	7.81939	9.38327	8.90208	7.2179	0.837951	0.863006	0.835167	0.863006	0.835167
981	0.05	3	123.208	135.695	153.178	249.746	258.071	249.746	100.311	100.311	97.0751	100.311	97.0751	100.311	100.311	90.6034	100.311	97.0751	100.311	97.0751	136.065	132.115	13.1676	13.6065	13.1676	13.6065	13.6065	32.0411	33.3579	21.0681	21.507	25.0184	7.24147	7.68786	7.43986	7.68786	7.43986	7.68786	7.68786	6.94387	7.68786	7.43986	7.68786	7.43986	240.302	240.302	162.785	65.8893	65.1141
1093	0.15	0.8	18.8646	27.588	35.3083	30.1548	36.5788	27.6651	16.6773	9.86349	10.6452	11.9255	14.141	25.3653	25.1881	37.2195	42.3915	39.5303	45.6581	69.8327	62.2517	60.5773	21.2015	22.9634	23.0102	23.1954	55.9191	69.9315	69.582	59.859	71.0738	138.148	130.459	32.5026	20.2881	16.8147	20.1593	134.406	85.4505	58.823	59.7189	53.496	160.809	65.8084	47.3893	21.5131	15.3738	15.4636	13.4113
1709	0.5	0.75	122.786	93.6831	185.67	113.486	62.005	42.7884	40.8127	33.0708	20.9026	16.8219	17.7436	20.9745	31.5502	87.6254	88.4285	73.7252	87.0603	126.041	43.8262	28.1469	24.0344	27.7506	23.7203	59.2044	118.425	176.922	184.653	59.8971	47.8441	69.3353	50.1648	31.5691	20.5744	16.9067	29.3577	53.2961	50.9121	92.7725	110.842	115.795	127.213	60.1096	40.854	25.0495	17.1819	15.5479	25.3731
1017	0.05	2	17.6988	35.1751	94.653	30.6983	25.5819	1.84935	5.62058	5.62058	5.43927	5.62058	4.94974	3.17291	3.00973	5.07665	5.62058	5.43927	5.62058	95.2682	55.5731	9.84438	9.52682	9.84438	9.52682	9.84438	38.4248	88.917	98.4438	95.2682	98.4438	91.9951	12.266	26.0653	34.0382	23.3054	36.7981	135.367	95.0616	85.8621	95.0616	91.9951	95.0616	335.932	145.571	34.713	23.0171	9.01997	55.4065
1194	0.15	8	12.0592	15.7776	16.4705	13.9838	12.865	10.7936	8.85433	7.37464	6.37128	12.4882	10.9364	13.7734	12.4801	9.79505	12.342	12.1179	11.6047	10.7465	9.37596	7.85075	6.70919	129.566	33.835	27.0689	22.8109	27.6244	25.4611	20.3425	80.3871	44.5739	28.4165	22.1367	16.8143	14.2118	11.6292	10.7792	10.2224	9.51419	11.2386	11.3863	10.7502	9.91012	8.65788	7.28894	6.01332	5.49905	4.8582
[truncated: 433 more columns]

## Sheet: Storage(WG inflow-No Demand)
grand_id	a1	a3	1980-01	1980-02	1980-03	1980-04	1980-05	1980-06	1980-07	1980-08	1980-09	1980-10	1980-11	1980-12	1981-01	1981-02	1981-03	1981-04	1981-05	1981-06	1981-07	1981-08	1981-09	1981-10	1981-11	1981-12	1982-01	1982-02	1982-03	1982-04	1982-05	1982-06	1982-07	1982-08	1982-09	1982-10	1982-11	1982-12	1983-01	1983-02	1983-03	1983-04	1983-05	1983-06	1983-07	1983-08	1983-09	1983-10	1983-11
610	1	4	36700	36700	36700	36700	36700	36700	36700	36700	36700	36700	36700	36700	36700	36700	36700	36700	36700	36700	36655.1	36327.8	35977.9	35653	35347.7	35053	34771.9	34789.8	35231.8	35544.6	35287.7	34892	34456.4	34021.2	33673.4	33356	33075.5	33018.5	33256.6	33714.7	34649.8	35820	36098.6	35849.7	35563.6	35669.1	35896.9	36131.2	36381.8
753	0.8	2	22006.2	22108.3	22251.4	22739.2	23843.9	24590.1	24664.2	23987.9	23293.7	22779.1	22395.1	22023.5	21787.9	21545.1	21322.8	21214.9	21341.6	22810	23139	22625.5	21973.2	21474.5	21142.5	20793.2	20556	20366.8	20348.4	21670.8	24317	26373.4	27506.6	27270.3	26756.2	26534.8	26615.7	26717	27061.1	27508.4	27801.8	28434	29267	30208.2	30001.9	29097.9	28114.5	27377.5	26896.3
870	0.8	0.05	20257.2	20474.2	20665.6	20893.7	20988.8	21041.7	20885.6	20609.9	20358.6	20191.5	20159	20146.4	20124.9	20098	20102	20054.1	19904.6	19740.8	19432.2	18987.6	18488.6	18096	17751.7	17462	17159.1	16841.3	16589.2	17978.8	20309.2	21726	22324.5	22492.5	22462.4	22537.1	22737.5	22879.1	22979.8	23000.8	23120.5	23569.9	24119.8	24269	24181.6	23978.7	23779.3	23654.9	23572
597	1	3	21103.6	21765.2	23836.9	25011.1	25070	25070	24867.8	23915.5	22952.1	22288.6	21863.3	21447.4	20935.9	20270.3	19450	18782	19061.9	19221.5	18466.8	17347.8	16195.4	15186.6	14530.6	14054.3	13545.4	13042.5	13067.7	13747	15146.1	17069.8	17305.4	16586.1	15921.3	15580.8	15514	15602.6	15685.5	15928.6	16995.8	19055.9	21257.8	24701.3	25022.7	24490.8	23757.9	23205.6	22858.5
307	1	5	5452.33	5344.41	5319.81	5516.15	5822.69	6056.99	6137.49	5763.96	5518.91	5443.6	5462.72	5488.77	5524.99	5553	5706.58	6180.65	7116.1	9398.21	9520.78	8992.31	8475.08	8163.06	8015.57	7891.04	7759.29	7646.43	8018.75	9302.59	10727.1	12897.4	13895.7	13416.6	12832.8	12395.4	12101.5	11830.5	11611.9	11389.7	11185.3	11025.7	10827.4	10537.6	10004.8	9350.91	8685.51	8300.81	8055.26
1753	0.05	4	368.139	363.123	157.226	345.115	905.524	1460.83	1762.51	1953.86	2119.5	2317.26	2500.77	2754.59	2965.02	3541.36	4406.71	5019.24	1754.82	545.643	558.363	584.505	478.35	414.621	269.962	422.294	405.91	364.17	472.335	496.287	673.795	688.289	693.047	699.917	698.227	713.564	702.367	784	818.739	634.41	632.075	708.156	672.492	660.735	674.172	686.058	696.068	699.065	687.39
297	0.55	0.8	2924.89	1688.26	790.669	842.026	2075.27	3203.86	2875.71	2657.64	3017.74	3178.31	3294.66	3237.42	3386.95	3439.79	3525.56	3629.39	4837.75	6957.93	7434.2	7033.13	6134.3	5317.88	4317.53	3256.95	2053.73	943.343	718.006	720.716	853.297	1674.26	1984.98	1762.63	2223.73	2774.47	2959.11	2965.43	2976.41	2950.83	3079.52	3293.2	4224.54	5588.33	6798.83	6786.06	6003.44	5010.29	4265.29
1036	0.45	2	4007.75	3982.15	3954.44	3926.61	3888.69	3852.95	3804.61	3750.49	3703.09	3672.5	3649.39	3626.17	3596.71	3572.24	3545.81	3512.5	3485.48	3462.01	3424.04	3391.76	3358.96	3329.07	3309.65	3284.26	3263.45	3271.37	3250.85	3218.37	3187.19	3169.69	3145.4	3116.31	3086.82	3060.1	3042.2	3066.33	3062.28	3047.29	3025.18	3010.74	3007.79	2984.77	2957.89	2918.08	2882.62	2859.63	2854.86
989	0.35	1	6070.37	6079.1	6083.95	6089.42	6075.66	6057.48	6029.5	6012.09	6004.06	5996.05	6002.08	6006.13	6004.73	6008.59	6007.81	6001.04	6009.29	6028.63	6038.67	6031.24	6020.07	6018.19	6033.07	6039.13	6044.96	6060.6	6062.24	6061.67	6056.37	6067.95	6058.72	6049.74	6051.53	6044.14	6045.14	6069.85	6074.04	6076.28	6074.19	6099.77	6110.78	6104.31	6082.08	6053.68	6036.29	6036.5	6063.2
1135	0.45	3	3792.39	3766.42	3731.88	3691.9	3653.51	3607.08	3550.54	3496.73	3451.44	3452.06	3429.07	3408.24	3380.25	3351.9	3329.6	3300.76	3278.56	3258.72	3215.69	3170.22	3141.16	3156.23	3175.23	3161.98	3138.96	3131.29	3111.56	3083.95	3078.42	3089.16	3064.34	3032.96	2994.31	2963.59	2947.39	2940.05	2920.14	2905.64	2892.33	2870.62	2848.81	2829.15	2800.72	2760.34	2723.98	2704.26	2698.38
1269	0.2	6	3608.16	3623.15	3617.16	3658.02	3646.14	3594.08	3500.41	3415.68	3324.03	3282.42	3279	3270.11	3246.58	3239.03	3213.79	3162.03	3130.74	3152.2	3134.05	3045.6	3025.33	2980.98	2967.6	2950.87	2950.42	2959.54	2961.42	2965.73	2982.7	2921.07	2876.38	2836.08	2775.39	2766.63	2783.72	2888.99	2965.13	3015.38	3046.22	3046.82	3043.91	3053.71	3008.69	2976.86	2938.13	2896.76	2881.11
1077	0.6	3	2815.97	2800.56	2781.89	2757.85	2742.6	2717.62	2669.3	2608.47	2562.51	2551.08	2536.54	2528.29	2510.11	2495.12	2484.71	2464.04	2456.26	2441.13	2398.33	2368.66	2342.36	2346.35	2369.03	2360.99	2349.15	2365.82	2352.02	2326.14	2317.76	2333.45	2300.18	2266.05	2229.77	2208.19	2204.78	2227.35	2221.1	2221.55	2214.78	2203.4	2206.31	2189.97	2158.13	2112.07	2074.1	2061.14	2062.53
1026	0.55	3	2072.75	2056.26	2038.12	2020.75	1991.8	1965.51	1931.78	1895.9	1864.52	1839.4	1824.99	1810.49	1789.67	1773.78	1755.71	1733.85	1719.62	1709.11	1691.99	1676.13	1656.33	1641.21	1639.32	1625.46	1613.29	1626.75	1614.25	1595.63	1573.88	1562.75	1545.53	1527.87	1515.95	1498	1489.19	1522.71	1519.39	1510.8	1496.58	1491.28	1496.4	1479.93	1463.41	1439.24	1416.49	1406.14	1407.8
740	0.05	0.05	942.282	950.773	942.722	906.891	836.407	782.216	757.201	783.294	869.026	886.332	903.935	910.572	896.623	879.328	851.188	829.363	800.53	861.767	910.317	908.91	937.044	1006.39	1008.06	1023.57	1050.96	1064.95	1048.9	1031.9	1010.56	999.552	1008.71	1016.15	1002.34	1099.93	1118.91	1113.71	1099.39	1077.92	1076.8	1047.28	989.822	973.762	979.411	964.951	1044.45	1102.72	1109.34
1294	0.35	6	2018.24	1994.77	1969.98	1945.01	1920.48	1894.44	1866.03	1838.94	1815.1	1794.88	1774.57	1757.71	1738.3	1720.64	1705.95	1691.71	1675.79	1672.77	1664.88	1647.12	1632.11	1618.82	1607.72	1594.06	1579.3	1565.72	1551.43	1535.55	1520.44	1502.19	1482.99	1463.26	1445.06	1428.94	1413.83	1399.72	1385.1	1374	1365.14	1354.4	1339.22	1325.36	1309.75	1294	1278.3	1264.43	1250.43
1848	0.2	0.05	385.113	372.563	482.556	608.847	548.752	453.946	376.19	368.863	364.106	369.435	397.804	406.668	369.912	398.106	374.119	378.086	381.14	419.04	439.673	445.41	451.931	453.2	457.407	471.516	593.631	734.7	824.548	957.665	918.757	747.25	568.012	403.331	363.287	364.289	372.394	577.473	692.139	657.396	578.846	547.413	589.7	626.032	541.499	444.481	372.662	369.447	389.923
1869	0.1	2	1050.85	1320.88	1831.2	2874.08	2976.23	2767.73	2518.64	2231.86	1930.85	1645.97	1361.21	1097.41	834.519	668.346	607.94	475.1	389.943	410.165	408.92	387.289	364.018	339.49	335.111	335.159	400.741	724.611	971.071	1388.24	1779.77	1679.63	1536.97	1378	1215.85	1054.47	892.004	1848.71	3109.98	3356.56	3355.94	3357.16	3319.63	3207.35	2975.47	2684.85	2369.79	2054.61	1746.68
1863	0.75	3	2718	2900.15	3079.31	3140.52	3110.79	3084.07	3018.38	2923.56	2823.1	2747.6	2689.42	2631.05	2553.92	2631.61	2667.3	2622.57	2542.8	2476.41	2386.67	2294.91	2205.34	2110.91	2024.73	1952.01	2191.99	2510.53	2660.52	2663.6	2694.52	2629	2552.2	2474.16	2385.2	2308.58	2248	2383.46	2542.63	2714.59	2823.63	3012.14	3011.07	2959.81	2878.38	2782	2693.69	2601	2548.93
1770	0.4	3	1685.81	1685.61	1688.81	1689.75	1671.06	1645.61	1619.12	1591.54	1567.01	1545.02	1526.46	1513.31	1496.96	1493.57	1487.49	1477.1	1459.71	1448.87	1427.24	1406.81	1390.23	1372.98	1361.68	1355.85	1363.13	1375.72	1381.08	1373.22	1355.62	1339.88	1319.95	1304.48	1293.55	1276.43	1264.38	1275.09	1278.48	1278.98	1273.1	1267.65	1264.95	1257.66	1238.07	1216.85	1199.64	1186.3	1178.32
965	0.15	5	1441.32	1428.76	1418.46	1424.03	1411.43	1394.39	1371.66	1349.94	1331.09	1313.11	1297.36	1281.38	1264.5	1248.12	1232.18	1215.27	1199.31	1182.18	1162.66	1149.54	1135.68	1121.59	1108.6	1098.16	1085.41	1075.97	1075.66	1072.26	1072.22	1079.49	1074.85	1063.6	1053.47	1042.21	1030.57	1019.56	1009.5	1002.28	997.826	1018.05	1017.65	1015.08	1008.13	992.963	979.414	967.591	958.596
1247	0.25	4	1170.47	1156.11	1139.86	1123.03	1108.15	1088.97	1064.69	1040.62	1019.84	1017.29	1005.19	1000.54	990.321	978.345	968.894	957.326	944.592	933.798	918.777	901.554	887.587	889.34	895.542	888.192	879.375	873.098	865.882	857.259	854.176	854.087	848.074	834.878	820.712	809.349	801.431	794.667	786.305	779.117	771.506	762.838	753.633	744.419	731.08	718.063	706.591	697.362	689.011
7313	0.25	3	1262.78	1178.71	1185.78	1299.4	1573.13	2077.48	2155.22	1865	1612.83	1505.3	1428.72	1356.84	1288.62	1202.6	1265.48	1361.44	1662.8	2278.22	2287.9	1942.4	1591.26	1348.47	1214.1	1122.55	1060.86	994.657	1348.24	1999.8	2519.92	2529.9	2467.63	2197.93	1919.11	1806.19	1731.58	1673.66	1678.29	1678.71	1920.85	2282.4	2508.3	2529.64	2454.75	2202.02	1935.12	1771.99	1711.43
1287	0.5	3	241.058	237.908	240.785	241.332	242.216	242.956	244.201	245.393	246.006	241.607	246.16	244.193	245.622	245.341	243.815	244.156	244.633	285.661	256.216	241.937	243.518	241.72	245.603	238.504	241.315	238.117	240.218	239.886	252.549	243.185	239.491	241.922	243.689	243.909	244.863	240.508	238.42	246.118	266.957	241.686	245.423	240.95	242.301	243.731	244.476	244.713	245.82
1186	0.15	7	297.102	427.601	366.802	336.413	350.068	343.648	303.376	253.723	245.113	245.032	245.104	245.078	245.015	245.12	245.016	245.051	265.182	413.499	472.011	498.25	520.059	540.057	570.366	598.002	621.92	691.192	751.705	787.31	719.842	555.289	381.316	248.534	234.745	228.758	227.45	387.953	342.215	324.779	343.598	271.879	264.128	306.008	331.698	342.491	345.188	346.075	349.158
1042	0.5	7	243.314	251.9	244.411	243.398	250.392	262.283	267.149	269.01	268.424	269.342	272.118	275.149	275.58	287.961	302.256	316.117	303.843	280.476	247.677	243.626	242.234	242.679	243.16	243.736	254.011	360.755	387.269	347.808	303.636	271.47	244.879	243.2	242.824	243.26	247.713	474.188	539.858	517.361	484.577	482.216	490.175	431.672	359.474	276.75	243.237	244.137	290.665
884	0.05	0.75	171.722	170.737	168.222	167.379	171.935	168.318	176.23	264.092	383.971	507.705	636.952	763.221	889.175	1007.97	1124.29	1247.74	1363.72	1479.31	1591.75	1330.04	718.803	233.469	188.941	188.315	188.219	188.2	190.294	187.283	192.108	190.696	188.186	249.397	404.092	564.547	720.082	873.296	1028.79	1174.68	1325.22	1482.42	1635.65	1778.94	1918.42	1599.38	882.738	271.707	183.754
1273	0.2	9	228.814	229.137	229.312	228.582	229.575	229.706	231.225	230.712	230.576	232.734	232.349	263.134	283.15	297.497	325.657	357.106	372.289	399.744	346.851	235.78	224.502	226.559	228.51	228.467	228.698	228.477	228.423	228.629	251.323	230.1	245.05	265.773	279.056	289.683	298.648	307.811	322.08	349.57	380.635	414.776	435.701	448.97	373.331	242.232	220.437	212.116	203.701
961	0.05	8	0	0	0	0	0	0	0	0	0	0	0	0	0	0	0	0	0	0	0	0	0	0	0	0	0	0	0	0	0	0	0	0	0	0	0	0	25.3598	66.1797	111.096	231.493	266.82	271.594	252.861	232.06	229	228.944	238.941
1144	0.1	1	185.394	178.665	188.475	186.423	185.031	190.181	255.708	318.977	365.962	575.219	767.643	989.291	1179.84	1332.73	1509.08	1667.23	1808.1	2133.79	1635.45	436.146	193.224	167.273	179.306	180.731	189.961	168.282	183.921	187.47	175.157	160.279	309.364	413.181	452.337	473.228	490.344	964.56	1413.63	1597.27	1910.22	2072.02	2226.39	2288	1652.72	455.711	190.512	192.946	194.96
616	0.85	4	176.543	297.489	974.393	432.334	205.149	874.505	619.962	544.19	1233.79	1923.2	2242.9	2242.9	2242.9	2242.9	2242.9	2242.9	2242.9	2242.9	2242.9	1612.64	465.617	173.419	176.726	177.407	174.022	173.524	172.393	174.133	172.572	175.95	173.775	506.753	1133.1	1748.5	2216.01	2242.9	2242.9	2242.9	2242.9	2242.9	2242.9	2242.9	2242.9	1533.91	351.686	177.214	181.293
911	0.15	0.6	143.486	182.426	179.008	180.108	179.468	178.997	288.849	450.634	598.028	719.572	823.027	916.937	1011.12	1095.77	1225.49	1321.97	1404.27	1459.11	814.548	179.068	152.441	111.549	80.0697	96.1558	96.2432	161.252	312.702	211.87	247.943	213.801	443.761	798.462	1027.87	1219.59	1536.17	2109.18	2171.4	2171.4	2171.4	2171.4	2171.4	2171.4	1650.05	398.14	178.686	178.994	185.369
1006	0.4	5	965.933	961.495	957.107	952.808	939.232	924.974	904.119	882.636	865.688	853.177	846.776	839.097	828.817	822.111	814.934	804.847	801.162	806.831	803.879	796.588	786.515	781.079	788.858	784.816	782.251	793.335	789.497	782.922	775.899	776.142	764.574	757.237	757.25	748.3	744.211	763.054	759.685	755.644	748.797	756.896	768.489	760.234	751.167	735.644	722.738	725.797	743.145
1048	0.15	2	0	38.3438	76.4149	79.7057	87.758	97.1174	441.123	906.885	1277.66	1599.32	1895.5	2061.62	2063.1	2063.1	2063.1	2063.1	2063.1	2063.1	293.662	0	0	0	6.0347	1.14336	0.495617	82.1294	30.6859	0	55.3741	81.3334	406.901	907.913	1283.3	1584.9	1838.12	2040.43	2063.1	2063.1	2063.1	2063.1	2063.1	2063.1	315.95	0	0	55.195	84.7066
1123	0.95	5	903.234	898.352	887.783	876.146	866.02	852.841	835.287	816.095	799.608	805.931	797.587	792.075	781.739	774.212	766.855	756.954	750.45	751.924	743.315	731.82	720.945	713.163	709.698	702.826	695.31	699.964	696.991	689.276	690.752	697.823	688.666	678.742	666.205	656.515	651.114	667.354	667.909	663.393	661.473	657.312	663.394	659.731	654.84	641.674	628.928	620.365	615.245
1032	0.4	2	12.096	91.574	167.504	168.821	170.618	158.15	206.493	265.29	311.639	346.034	372.407	394.575	408.513	421.732	453.02	489.97	537.046	653.996	455.799	184.488	180.295	178.777	190.302	183.051	183.378	198.51	182.063	182.149	215.943	398.026	312.333	225.22	187.242	187.384	187.167	196.478	214.956	326.648	406.297	750.238	934.634	1036.91	702.153	207.608	178.395	187.439	177.439
1774	0.4	0.85	242.526	267.832	509.97	677.273	488.797	403.514	472.459	509.841	527.16	530.715	522.82	510.341	492.941	560.209	788.172	1038.65	1202.6	1266.55	1075.08	817.439	542.236	263.022	182.978	183.045	249.269	841.563	1278.32	1393.53	1255.46	1079.69	895.22	685.839	515.532	309.796	185.03	270.527	396.78	660.051	862.84	1081.64	1236.23	1246.72	1056.61	822.407	566.809	296.596	183.229
1781	0.25	0.85	165.976	170.582	186.231	168.696	178.768	181.55	183.251	183.96	184.553	184.625	184.268	184.675	183.806	217.138	202.493	184.65	182.659	181.08	183.843	184.359	184.821	185.43	184.796	184.489	196.446	385.08	489.574	427.104	220.627	176.914	178.571	178.283	180.269	180.587	178.728	170.64	168.99	182.41	165.608	174.05	177.288	180.724	181.968	183.763	183.858	184.077	183.49
355	0.4	4	204.901	172.129	173.197	250.019	598.567	786.364	660.429	479.095	340.181	223.991	189.113	217.224	225.747	213.805	237.975	404.932	821.673	1267.59	1136.59	861.03	612.91	407.512	223.545	171.441	172.518	171.258	172.819	222.72	391.458	546.529	473.445	316.861	197.908	174.189	211.049	295.631	405.9	507.173	674.702	939.196	1620.64	1760.6	1629.05	1335.53	1083.99	910.125	783.611
1101	0.4	3	778.743	816.763	998.324	1353.91	1374.72	1307.17	1208	1091.31	968.126	848.358	750.259	758.306	708.821	718.594	715.374	730.841	673.15	644.223	638.089	603.743	560.861	512.593	465.478	419.861	413.642	547.212	674.13	798.451	862.922	846.622	792.463	726.524	656.9	586.318	519.277	917.094	1415.24	1620.76	1675.27	1705.43	1706.9	1665.86	1553.56	1410.35	1257.5	1104.25	960.925
1023	0.05	2	146.172	146.692	157.195	407.253	200.915	164.905	269.933	481.148	656.803	812.551	952.311	1085.17	1212.09	1328.14	1442.55	1558.17	1634.36	1637	1197.75	362.553	141.566	79.3413	68.7245	73.5792	54.7096	78.8786	143.451	140.011	140.369	141.332	185.289	258.175	303.355	324.477	329.423	329.359	334.507	363.322	438.13	1009.58	1490.71	1637	1240.58	474.955	145.823	146.248	145.742
1060	0.55	5	466.35	475.112	495.377	524.031	517.69	508.293	491.631	471.538	453.746	440.899	427.687	438.162	434.753	439.642	457.36	460.238	473.892	499.671	497.667	494.741	489.361	484.49	530.269	539.979	548.928	646.58	666.964	662.811	654.088	660.964	657.355	635.377	613.051	592.007	577.586	747.106	778.491	812.367	810.702	810.406	871.219	878.972	858.57	828.229	798.586	772.8	763.132
1864	0.1	2	920.356	917.005	919.87	927.585	919.759	905.824	890.653	873.458	857.462	851.645	845.437	841.07	832.678	828.338	822.298	813.53	802.984	794.96	782.57	767.954	756.972	746.693	738.901	734.388	734.24	733.419	729.311	728.209	723.938	714.869	704.58	699.816	695.062	691.538	687.43	704.022	716.971	720.611	720.62	725.177	728.93	728.313	717.918	703.747	692.04	685.27	682.843
1797	0.65	0.8	46.1969	46.5639	19.1925	52.2063	186.245	293.441	364.244	424.19	477.864	532.644	588.205	656.048	723.865	872.376	1066.18	1234.09	365.989	88.1949	89.0561	95.8063	89.4455	96.6381	90.4263	86.1082	58.1593	34.1643	54.7324	81.2077	117.903	117.117	121.226	120.271	121.736	121.345	118.133	118.051	99.1518	111.13	91.5772	74.5694	93.9557	114.522	120.735	122.799	125.939	127.042	122.872
305	0.85	0.1	14.7225	0.0331969	26.8453	22.1501	28.0158	24.5882	570.694	1113.91	1417.33	1424.7	1424.7	1424.7	1424.7	1424.7	1424.7	1424.7	1424.7	1424.7	47.0635	0	0	0.552642	8.83973	30.9848	0.252686	11.7497	33.0772	36.5219	32.1229	34.1662	634.413	1177.57	1418.13	1424.7	1424.7	1424.7	1424.7	1424.7	1424.7	1424.7	1424.7	1424.7	65.4916	0.148823	0	0	20.8164
968	0.05	7	0.0189223	0.0685236	5.17121	127.602	123.493	121.279	148.214	192.21	235.316	279.079	325.02	369.484	412.899	453.276	493.546	534.157	600.495	684.064	447.787	141.515	127.301	127.78	133.501	135.165	125.422	132.81	130.177	130.262	132.551	131.436	162.902	201.365	231.928	258.36	282.321	304.802	326.933	352.523	389.399	519.532	583.499	683.094	481.54	141.621	136.499	128.608	130.771
1019	0.1	0.05	714.129	708.296	707.666	706.404	698.049	688.682	679.35	669.648	660.362	651.664	643.599	635.811	627.016	620.289	615.127	607.799	602.254	604.345	599.294	592.964	585.672	578.416	571.909	564.978	560.138	569.573	578.102	575.245	568.973	562.691	555.932	548.678	542.992	536.417	530.001	548.716	562.834	561.923	559.6	566.223	578.685	573.715	566.588	558.471	550.645	544.291	540.129
1302	0.05	7	856.238	851.048	844.874	838.84	832.657	825.402	815.675	807.232	801.821	798.496	794.971	793.37	789.999	787.189	785.184	782.237	778.556	785.613	786.719	779.477	774.46	770.68	767.637	763.832	759.095	754.447	749.45	743.826	738.875	732.256	724.287	716.926	710.351	705.695	702.228	699.399	696.045	693.665	692.08	689.787	684.846	680.722	675.422	670.056	664.806	661.167	657.736
1824	0.2	1	8.52284	27.7345	163.903	408.147	291.596	356.778	305.703	218.47	124.122	106.095	106.746	98.8395	110.485	271.029	496.345	619.189	522.273	250.815	104.979	110.653	114.672	117.019	116.668	97.8411	261.166	691.886	905.659	890.894	675.198	300.387	95.5863	93.0698	100.418	100.963	105.014	230.718	341.171	396.202	387.837	476.278	587.497	664.642	447.651	185.623	102.783	110.798	101.82
1316	1	0.05	0	0	0	0	0	0	0	0	0	0	0	0	8.4067	21.5776	42.3583	72.369	136.708	204.171	275.018	274.323	274.438	274.116	285.832	285.399	280.316	273.704	268.581	258.415	248.335	237.074	226.199	214.968	204.857	196.566	189.551	181.734	174.132	168.424	163.093	157.393	151.55	146.685	141.617	134.984	130.31	127.451	126.618
1835	0.9	0.5	0	6.97192	0	0	115.135	111.139	92.6858	99.5941	98.2168	102.206	101.18	101.882	94.772	242.256	401.829	447.236	131.461	73.2212	95.0015	91.499	93.6385	97.1842	100.191	83.5386	21.9502	0	6.11208	44.4865	214.417	368.291	490.256	607.405	702.24	781.893	863.709	1212.86	1318.6	1318.6	1318.6	1318.6	239.394	38.6063	45.2406	51.7406	52.1015	54.1316	45.0517
1847	0.3	2	2.62354	10.0113	0	8.49011	297.988	607.488	788.056	929.15	1053.27	1197.65	1287.34	1293.9	1293.9	1293.9	1293.9	1293.9	115.88	42.8075	60.0211	6.80069	0	0	0	40.5763	7.20476	0	4.86	33.6126	77.5033	87.0801	87.2619	91.9556	92.1296	93.6099	93.4803	47.5479	40.6666	27.4405	15.7955	10.4663	49.6367	78.3456	89.9109	93.3963	97.2277	99.132	94.8055
1231	0.4	5	645.271	643.436	637.748	631.703	624.376	613.197	599.657	588.122	579.02	572.359	566.03	560.7	554.347	548.48	542.686	535.595	530.432	534.088	528.877	519.828	513.49	509.909	508.156	504.496	500.432	497.48	493.37	488.786	484.491	478.828	472.727	464.944	457.697	452.219	449.311	455.571	454.164	452.975	453.786	450.53	446.498	443.289	438.829	433.217	427.96	422.779	418.711
1140	0.05	0.05	133.295	133.75	133.381	132.762	133.61	135.406	131.449	128.092	127.786	127.671	127.532	128.079	127.131	126.474	127.175	126.887	127.209	127.917	128.082	128.926	129.34	129.527	129.355	128.935	128.453	128.305	128.3	128.072	130.717	137.015	140.352	131.722	127.898	127.131	126.258	126.221	127.481	139.743	135.466	129.015	127.466	127.68	128.017	128.299	128.286	182.25	286.928
1296	0.25	10	1052.2	1058.26	1057.2	1055.26	1053.58	1050.79	1043.4	1035.66	1029.17	1024.72	1020.51	1016.86	1012.52	1009.82	1006.44	1001.53	997.578	1005.71	1007.01	1000.38	996.106	992.694	1000.94	1001.98	999.851	997.883	995.829	993.352	997.741	997.152	991.74	984.811	978.728	974.811	971.996	978.637	980.608	991.153	1003.11	1012.35	1016.94	1024.15	1019.78	1014.66	1010.32	1006.2	1002.37
1659	0.05	5	818.586	816.978	842.977	858.898	856.903	851.009	839.963	829.274	818.805	807.281	795.915	785.71	775.788	782.506	785.672	785.83	801.867	811.897	807.689	803.375	822.483	819.481	815.037	810.657	813.667	855.774	947.24	979.043	983.127	981.657	973.894	962.016	949.497	937.294	928.793	955.154	966.243	973.11	980.451	1005.2	1024.28	1032.41	1027.39	1016.31	1003.63	996.5	1012.51
1277	0.05	10	139.594	142.554	144.363	146.543	157.283	164.845	147.444	125.492	123.31	123.167	121.904	124.868	124.727	124.734	125.394	125.312	124.564	138.516	136.615	124.646	124.493	124.56	124.478	124.145	123.295	123.713	124.507	124.478	124.859	124.55	125.104	125.324	125.408	125.478	125.794	127.315	131.093	141.503	155.421	168.633	174.76	179.05	165.266	136.052	123.409	122.058	120.61
1021	0.05	6	57.8428	115.188	121.237	129.808	115.51	144.462	195.416	225.219	243.034	254.872	261.745	267.085	268.402	267.426	266.861	262.964	260.806	218.709	135.385	117.057	112.615	109.987	162.603	136.14	120.981	208.082	240.416	218.391	223.611	309.777	309.949	257.763	183.053	122.919	120.041	120.06	120.752	121.755	191.497	546.92	563.877	524.01	392.195	218.857	118.066	117.948	117.741
1280	0.6	7	113.133	112.751	110.126	116.17	127.741	132.451	121.571	120.956	272.03	618.12	675.035	764.766	854.268	928.14	1012.98	952.711	736.096	504.736	257.801	117.486	115.566	116.055	116.137	116.254	115.998	116.342	116.024	128.473	155.309	180.917	206.585	213.183	220.494	230.335	241.681	253.919	266.1	287.853	310.828	292.732	227.16	163.399	120.251	119.455	119.6	119.536	119.628
1120	0.95	10	122.07	125.577	128.155	130.565	133.875	135.969	125.79	115.068	115.022	115.123	114.99	115.072	115.259	114.957	115.135	114.989	114.852	114.918	115.346	116.305	116.976	118.164	119.345	119.609	119.623	120.796	121.948	123.111	135.136	167.194	169.612	156.775	141.696	125.463	114.974	114.91	114.963	114.926	114.89	114.9	114.936	114.876	115.287	115.563	115.634	135.616	173.126
182	1	0.95	768.201	1048.3	1097.6	1096.52	1072.87	985.921	873.832	769.771	677.52	585.912	494.082	405.328	313.307	304.036	361.217	446.357	435.296	399.364	338.741	291.707	260.316	232.37	273.778	607.251	1084.58	1102.7	1102.69	1102.7	1101.97	1079.24	1031.33	936.866	857.023	783.561	794.007	1080.56	1084.06	1100.28	1101.73	1098.66	1098.9	1092.22	1020.71	927.907	852.223	776.934	872.828
7311	0.05	7	105.232	106.951	110.349	115.529	116.478	116.678	112.004	105.226	104.591	104.695	104.703	104.708	104.708	104.729	104.739	104.721	104.722	104.548	104.5	104.572	104.619	104.697	104.627	104.598	104.628	105.131	104.552	104.535	105.708	109.581	107.107	104.434	104.541	104.575	104.646	104.606	104.574	105.428	104.909	109.012	107.487	104.782	104.453	104.463	104.906	105.732	106.749
1755	0.25	2	532.11	543.032	575.477	604.77	601.445	593.181	581.122	565.481	548.997	532.648	517.732	506.685	495.728	524.767	537.829	540.006	539.513	578.288	578.064	566.205	554.972	542.593	532.744	542.936	590.079	640.174	665.604	674.27	676.444	667.547	652.461	637.197	649.58	634.851	619.058	629.29	651.528	675.761	673.49	693.071	761.173	814.351	805.618	790.193	772.621	756.991	756.461
1152	0.2	5	0	0	0	0	0	0	0	0	0	0	0	0	0	0	0	0	0	0	0	0	0	0	0	0	0	0	0	0	0	0	0	0	0	0	0	0	0	0	0	0	0	0	0	0	0	0	0
1192	0.05	3	81.7157	80.2845	82.0741	82.1243	81.7689	104.987	134.4	154.735	171.779	193.223	215.38	238.562	259.086	280.845	303.153	325.219	350.068	235.52	85.4318	85.4568	86.079	86.7107	86.2589	86.1542	85.8071	85.6153	84.9659	85.1149	86.1279	90.2932	90.3673	90.7248	90.9394	90.7041	90.853	96.9482	110.223	100.007	93.4483	89.2066	89.3118	105.087	129.784	146.545	158.652	170.945	186.057
541	0.05	2	324.231	223.565	122.53	90.0681	681.816	922.703	884.684	802.111	712.839	620.211	526.866	428.324	321.15	213.76	111.853	130.923	431.007	483.677	422.266	377.927	326.326	277.721	233.65	187.58	141.753	99.1303	91.0931	99.4796	684.795	923.2	881.22	790.861	702.757	607.494	507.525	402.61	289.809	178.449	94.6927	90.0553	371.659	923.167	887.028	804.398	709.462	608.063	507.224
1822	0.35	0.5	0.466535	6.8024	0	0	41.643	50.8628	60.1985	62.5516	62.2035	64.5875	64.2896	62.5907	58.1618	54.7002	35.1712	24.7608	135.987	263.498	342.241	383.997	417.062	437.349	462.901	522.306	779.649	909.4	909.4	909.4	90.743	27.0937	31.5029	30.8576	31.8987	30.4485	26.3739	0	5.82975	0	0	0	27.0274	50.8165	58.2864	61.2321	62.2711	65.9037	63.6164
972	0.05	8	88.1732	107.429	179.256	794.095	810.895	752.471	673.686	581.62	470.929	344.276	210.428	97.3616	81.5476	75.1153	67.7169	60.6335	70.3225	88.1482	103.811	124.637	134.56	137.214	138.007	139.319	140.613	150.792	187.355	237.192	270.179	304.228	304.721	264.384	213.98	156.692	100.714	89.4015	87.5346	88.6728	93.9522	300.155	369.728	367.117	344.105	301.877	245.933	179.975	112.164
613	0.05	0.85	395.078	387.419	443.155	594.534	881.406	890.6	829.321	686.186	571.68	492.771	459.31	431.898	394.13	349.353	319.017	381.383	471.982	448.546	343.073	261.413	197.713	155.82	127.31	98.8847	87.9703	88.6539	146.944	257.619	499.532	683.541	608.041	480.767	385.518	314.051	258.328	221.091	182.395	155.901	244.579	373.895	599.716	872.693	823.703	681.639	552.645	452.205	385.539
1086	0.75	1	433.418	430.611	427.653	424.261	419.709	411.878	400.252	388.29	379.187	372.451	368.113	365.301	362.269	359.295	356.524	353.201	348.651	341.473	332.352	319.555	304.78	296.622	293.354	290.903	288.466	286.215	283.976	281.068	275.309	265.699	250.258	228.346	215.657	210.751	208.699	207.363	206.419	213.281	223.9	233.928	230.909	221.858	210.238	199.48	190.107	183.532	181.976
1295	0.15	10	638.701	640.179	638.071	636.186	633.432	628.306	618.703	610.243	604.272	603.472	602.569	602.51	601.093	601.224	598.378	593.922	594.053	595.957	593.265	584.791	584.021	582.298	587.704	587.921	587.299	586.246	585.401	585.421	588.729	584.305	576.808	570.347	563.596	563.298	566.11	574.689	578.22	582.155	585.479	585.21	583.916	584.773	581.241	579.157	577.654	574.59	573.441
1139	0.15	9	740.771	739.503	736.516	731.61	726.801	720.747	711.432	702.926	697.756	710.153	711.941	721.033	721.202	720.249	731.37	731.246	730.132	729.515	723.529	717.106	712.543	731.273	748.23	749.03	748.012	750.441	752.272	751.178	762.523	784.043	796.093	793.445	790.135	788.027	786.509	787.64	790.683	794.092	795.182	795.627	793.311	790.942	784.344	776.519	769.408	768.061	768.446
1862	0.6	1	88.2646	75.9462	193.679	261.854	169.055	176.528	146.444	102.423	80.8167	80.5585	81.1563	80.5553	80.2269	198.17	277.592	307.924	244.65	176.631	94.7694	79.8655	79.8807	79.9469	80.1022	79.6668	210.737	451.038	578.899	553.869	487.157	291.507	107.573	77.1283	77.8443	77.6019	77.4073	142.752	126.781	122.29	86.0452	111.481	99.2514	137.156	139.585	130.31	118.659	102.828	111.918
629	0.05	0.35	37.701	70.1972	195.082	31.1066	31.1414	100.911	23.784	269.416	653.186	803	803	803	803	803	803	803	803	803	803	368.959	36.2418	38.1312	37.3311	38.2562	36.1874	37.7789	36.8496	38.5434	34.7787	37.4836	38.7876	165.741	340.281	491.854	647.752	787.582	803	803	803	803	803	803	803	367.682	39.4867	38.9466	39.1303
1000	0.65	3	430.144	441.445	460.945	475.547	473.292	465.613	454.406	441.221	428.295	416.813	411.452	417.979	413.964	419.166	427.912	421.905	437.894	484.727	505.213	501.55	494.429	487.875	501.239	512.447	524.954	569.956	588.461	589.89	584.463	592.515	583.815	571.665	563.927	550.547	539.223	613.706	620.072	618.501	610.595	666.674	691.355	684.265	669.427	651.1	633.36	635.799	685.232
7306	1	10	0	0	0	0	0.0178619	15.2494	33.0315	36.6135	38.2759	36.4675	43.1488	36.0704	32.704	36.9166	11.2462	0	33.9516	36.418	53.9852	53.2378	57.8291	58.3385	60.9912	38.7641	292.726	777.883	789.518	742.537	55.7193	22.6704	18.9021	16.5016	22.2156	25.4332	19.0786	0	0	0	0	0	36.8435	9.05789	34.8769	38.4735	39.0635	40.5468	36.078
991	0.1	1	392.16	390.549	388.909	388.507	382.479	374.405	363.361	355.026	348.913	344.916	342.648	340.337	336.907	333.229	329.859	325.645	322.617	322.047	318.798	315.689	312.205	310.079	311.339	310.462	308.442	308.029	306.439	303.721	303.006	305.631	301.843	296.251	292.657	289.132	286.49	284.75	282.902	281.791	279.545	284.065	284.112	282.232	278.42	270.804	265.796	263.911	263.874
7317	0.15	4	558.681	569.976	600.631	623.985	619.635	612.402	601.442	587.532	574.696	563.673	553.489	545.38	536.158	540.1	538.714	535.072	527.139	519.927	509.366	498.098	487.885	477.153	469.843	466.332	489.117	518.825	529.369	530.788	525.278	515.405	504.726	497.791	490.056	481.699	474.471	495.604	510.989	527.444	528.955	549.313	568.177	581.373	573.937	563.131	553.255	545.108	542.188
998	0.45	1	105.366	122.235	80.0275	262.585	582.331	739.51	600.094	426.546	317.662	263.887	215.29	155.635	88.0785	71.1389	71.1724	71.3127	70.8153	70.6467	72.843	68.5591	63.4981	71.0071	74.7377	74.7377	74.7377	86.119	121.307	146.481	137.35	92.0924	74.7265	74.2145	100.396	160.751	230.059	295.04	356.695	388.115	463.357	660.567	750.3	750.3	626.4	394.211	216.066	95.9118	71.1005
1716	0.2	2	630.74	632.979	636.693	639.17	634.54	627.666	620.474	611.065	604.362	602.278	604.864	609.582	609.265	611.765	611.119	608.725	610.723	614.679	608.37	603.129	598.996	595.591	597.72	600.702	607.767	621.518	623.645	623.107	617.967	617.183	611.188	601.546	599.464	599.889	600.375	616.991	625.893	629.135	629.5	634.434	647.13	646.965	637.658	625.009	616.352	620.522	631.523
1896	0.05	2	58.2496	57.664	44.6997	57.8279	99.9723	157.05	190.59	216.217	237.243	273.579	303.997	333.021	355.618	425.132	504.511	551.123	375.774	91.2864	64.9161	65.2519	65.6847	65.4765	65.4834	64.6229	58.8673	55.7984	60.5356	58.5763	83.8777	122.446	155.288	188.82	208.385	231.967	256.516	321.264	420.735	490.314	563.707	659.797	464.883	103.144	62.7679	63.1576	61.628	63.8991	61.6811
1883	0.05	2	84.7218	88.2862	110.531	128.641	89.628	127.951	149.87	160.78	166.296	177.373	186.138	202.423	219.637	333.36	450.498	479.966	413.204	272.426	128.229	70.376	66.7292	59.9924	54.5811	51.7173	143.373	202.137	167.993	82.9278	93.8603	101.384	96.1909	89.5581	75.317	72.3335	72.3336	84.373	212.064	335.167	448.283	621.882	588.39	407.853	216.909	73.9069	68.4888	63.593	62.2698
1285	0.05	9	69.0179	68.9646	68.9907	68.991	73.8281	73.0835	68.9777	69.0035	69.0107	69.0232	69.0091	69.872	69.0273	69.0997	69.267	68.9711	68.9837	91.283	95.4591	84.3069	74.0422	68.9004	68.911	68.8913	68.9008	68.898	68.9299	68.9174	69.0209	68.9016	68.9669	68.9773	69.0187	69.0105	69.0494	69.0009	69.0352	74.681	78.7431	78.5474	73.7062	69.8755	70.0297	71.7522	73.195	74.6141	75.8291
1266	0.45	6	68.8216	69.1672	68.5748	68.8263	70.038	68.9264	68.5499	68.5781	68.7042	68.6759	68.8923	68.6912	68.7183	68.6979	68.7755	68.7258	68.7991	69.8055	68.7243	68.6089	69.192	69.5607	68.8023	68.6196	68.6274	68.601	68.6913	68.895	68.8426	68.9777	69.9965	70.3739	70.5214	71.6629	74.3892	80.7394	84.1909	92.4029	102.822	107.828	112.558	114.676	108.176	102.879	97.9459	91.9178	85.9002
1176	0.05	9	148.555	144.744	139.869	134.657	131.609	127.78	120.89	115.243	112.129	120.733	120.215	123.521	120.883	117.628	116.435	113.843	111.749	110.126	105.769	101.077	98.1308	99.6621	100.038	97.1603	94.0044	91.9109	89.8802	86.8558	89.2842	94.0236	95.876	92.8818	89.6067	87.0751	84.9378	83.9872	82.0525	82.2286	80.8216	79.7506	77.8059	78.7561	76.4938	73.3277	70.2367	69.3873	71.0423
924	0.65	0.05	414.364	410.212	411.896	416.85	409.002	409.704	401.729	393.435	393.808	387.436	386.457	392.871	396.698	398.276	405.093	403.99	401.252	397.206	410.75	429.985	423.565	417.566	415.136	413.55	409.966	416.972	454.239	472.468	480.424	495.113	503.039	509.04	508.466	505.328	508.733	526.01	529.098	536.973	544.669	574.084	573.588	565.901	552.698	535.808	523.588	514.046	519.92
758	0.05	4	542.16	561.964	577.572	582.242	565.485	544.276	522.739	510.029	515.755	515.754	520.947	526.23	528.168	529.595	526.323	526.072	518.426	510.901	498.919	475.443	463.137	476.589	475.42	474.194	477.914	478.164	477.347	480.356	468.524	459.524	459.501	454.834	448.76	476.267	501.593	518.389	538.419	551.853	562.565	565.454	553.648	545.338	541.106	517.786	504.724	512.197	519.569
1257	1	10	0	0	0	0	0	0	0	0	0	0	0	0	0	0	0	0	0	0	0	0	0	0	0	0	0	0	0	0	0	0	0	0	0	0	0	0	0	0	0	0	0	0	0	0	0	0	0
895	1	0.5	0	0	0	0	0	0	0	61.8716	167.325	268.715	372.935	476.153	580.494	660.228	666.1	666.1	666.1	666.1	666.1	525.083	253.05	42.2902	26.8691	27.8448	27.78	16.0888	22.5887	0	0	0	0	60.0121	180.341	308.02	438.492	568.75	662.591	666.1	666.1	666.1	666.1	666.1	666.1	542.771	309.98	82.2464	0
1317	0.3	7	484.51	483.683	476.521	468.906	462.309	457.293	443.297	455.071	462.996	459.691	455.683	456.066	454.652	453.329	449.541	441.812	441.167	449.901	452.268	443.372	441.496	437.398	442.971	439.911	435.923	433.108	432.218	426.17	422.81	413.841	400.309	388.724	378.619	372.437	371.949	369.882	366.706	365.437	363.275	357.631	348.195	340.782	340.374	335.191	328.695	329.415	329.627
1242	0.25	7	395.264	389.53	382.728	374.126	362.07	340.279	301.462	256.44	242.278	349.044	356.909	361.924	367.001	370.625	372.259	371.563	365.748	345.918	315.625	289.274	280.291	275.467	270.883	267.229	263.594	260.707	256.116	249.702	240.806	213.674	163.557	116.617	87.4942	77.9333	74.6167	73.6295	94.0817	125.993	138.33	140.951	137.926	121.945	80.7468	62.7108	61.0728	61.4542	64.9309
107	0.85	3	386.96	433.717	477.392	500.041	492.722	472.63	443.41	408.776	375.394	343.8	313.35	303.126	306.404	335.349	362.43	366.043	353.651	338.977	316.086	288.871	263.241	241.124	230.745	374.421	535.676	611.219	616.7	616.7	607.162	582.923	546.222	478.635	430.752	394.313	358.375	401.426	476.603	570.964	616.352	614.002	609.429	588.063	555.294	497.562	448.817	412.066	381.669
1841	1	10	338.863	389.085	515.982	581.518	575.714	560.554	530.064	493.766	454.715	415.088	373.691	334.652	293.198	308.101	319.603	326.073	304.78	296.126	278.949	258.896	238.131	215.383	192.984	176.657	254.065	416.923	498.832	513.603	508.553	480.869	447.967	413.384	376.355	338.102	302.5	364.385	408.818	436.711	448.865	476.141	487.963	493.165	472.919	445.147	414.83	382.171	350.587
907	0.05	0.7	44.5607	44.2277	45.1208	44.2398	44.3284	45.0153	69.7803	102.255	138.928	181.686	218.8	251.019	278.814	303.555	348.38	392.341	436.724	466.275	231.064	45.7838	45.9689	47.0361	48.2338	46.5048	48.5088	47.032	64.2834	45.3879	45.1689	44.7732	128.942	247.376	326.684	391.268	480.984	567.129	568.9	568.9	568.9	568.9	568.9	568.9	335.887	46.319	45.6193	43.4026	43.8561
80	0.65	2	166.87	153.265	159.358	136.52	116.935	130.315	122.489	103.371	85.5929	69.3236	81.8251	170.098	256.419	312.224	388.635	461.228	450.225	413.56	340.422	244.56	150.369	78.7346	55.0802	155.24	176.601	250.357	344.734	369.635	355.581	308.213	251.729	179.293	111.577	63.5778	61.8238	135.534	236.958	313.958	409.188	469.536	437.92	386.451	335.455	251.55	168.292	80.9821	68.6329
1236	0.05	7	57.7518	58.6678	59.6092	60.0689	60.1364	55.7403	53.0435	52.921	52.5903	52.3946	51.8174	52.5555	53.0874	53.0954	53.0936	53.1206	53.0757	53.0411	53.0743	53.0775	53.0938	66.2524	72.5624	67.007	60.0977	54.0923	53.0771	53.0902	53.0793	53.7621	53.6351	52.977	53.0411	53.0601	53.0532	53.0776	53.0707	53.0776	53.1077	53.0533	53.0687	53.0307	53.3767	53.3822	53.3826	54.1308	55.1077
981	0.05	3	48.7693	49.0612	55.0803	405.408	380.391	269.182	213.179	226.804	237.643	246.12	253.737	260.421	266.287	271.325	276.005	280.481	285.25	295.33	223.987	104.577	49.7027	48.9809	48.6636	49.5542	50.7649	52.1305	51.1037	50.7695	51.1198	50.8013	68.2512	100.453	129.859	157.963	185.238	212.214	239.294	272.248	314.066	391.258	440.726	481.758	409.982	236.64	78.7348	49.0543	49.2422
1093	0.15	0.8	52.1049	52.067	51.9838	52.0845	52.3504	52.0743	52.049	52.1245	52.2247	52.088	52.0837	52.2131	52.0538	55.2746	67.4125	66.1616	70.7937	105.254	93.5294	66.4042	51.6338	51.7453	51.691	51.7442	56.8134	177.34	208.14	192.913	175.989	173.964	93.4145	50.3968	50.3474	50.4603	50.306	67.1995	58.1842	50.4221	50.8153	50.271	96.7603	79.8121	55.0965	51.6115	51.6463	51.6449	51.7331
1709	0.5	0.75	277.802	275.269	273.062	270.592	267.692	264.621	261.837	258.985	256.061	253.131	250.331	247.673	244.931	242.553	240.331	237.895	235.436	233.755	231.277	228.671	226.176	223.741	221.436	219.235	217.298	216.121	214.754	212.826	210.2	208.341	206.363	204.149	201.822	199.526	197.532	195.758	193.748	192.143	190.492	189.068	187.695	185.994	184.087	182.038	179.779	177.856	176.346
1017	0.05	2	6.13421	23.4302	48.968	48.5553	47.752	48.5121	53.401	54.975	54.8609	53.4324	51.3748	50.9215	50.9506	60.0581	74.3238	81.1998	96.2391	112.597	55.5398	48.5223	46.6546	42.6833	39.5231	36.2556	58.8767	171.168	263.936	231.921	166.386	89.4311	49.9995	49.3111	49.9406	49.4466	51.8742	340.036	470.289	433.472	391.148	407.343	487.273	311.746	59.9762	23.374	3.40449	0	14.1827
1194	0.15	8	281.235	279.786	277.982	276.03	274.095	270.314	264.007	257.402	252.329	250.365	248.581	247.22	245.609	243.866	242.438	240.696	238.937	236.812	232.569	227.518	224.207	226.979	231.832	231.726	231.07	231.156	230.761	229.951	231.661	234.038	233.435	230.515	227.219	225.013	223.735	222.766	221.411	220.093	218.75	217.126	215.313	213.304	209.834	206.229	203.335	201.347	199.817
[truncated: 433 more columns]

## Sheet: Outflow(WG inflow-With Demand)
grand_id	a1	a2	a3	1980-01	1980-02	1980-03	1980-04	1980-05	1980-06	1980-07	1980-08	1980-09	1980-10	1980-11	1980-12	1981-01	1981-02	1981-03	1981-04	1981-05	1981-06	1981-07	1981-08	1981-09	1981-10	1981-11	1981-12	1982-01	1982-02	1982-03	1982-04	1982-05	1982-06	1982-07	1982-08	1982-09	1982-10	1982-11	1982-12	1983-01	1983-02	1983-03	1983-04	1983-05	1983-06	1983-07	1983-08	1983-09	1983-10
610	1	0.5	4	2204.19	4583.12	3663.81	2124	3935.16	4905.99	2053.4	1500.43	1484.12	1556.25	1510.86	1555.91	1541.14	1378.83	1864.78	1614.93	1428.72	1358.17	1319.81	1212.82	1153.74	1192.2	1153.74	1192.2	1192.21	1080.64	1213.89	1258.81	1359.66	1332.77	1307.28	1131.66	1078.69	1114.64	1078.69	1114.64	1114.64	1010.79	1137.31	1164.31	1274.61	1247.24	1223.79	1174.11	1120.66	1158.01
1294	0.35	0.1	6	52.0909	49.1867	50.6227	53.5396	93.1852	54.4663	47.4058	25.8173	64.5594	79.2337	103.656	118.11	109.949	104.588	281.393	209.468	195.209	549.426	214.926	193.119	172.23	207.674	201.108	177.597	171.122	160.283	162.074	100.875	119.915	92.3013	88.3957	82.6355	74.7227	74.29	71.2736	88.3194	109.224	188.905	227.364	116.996	119.91	100.603	86.3207	76.6855	66.6275	64.893
1247	0.25	0.5	4	65.0376	79.4073	65.9374	60.5164	101.704	63.4249	41.6205	33.9071	214.897	292.058	191.466	318.663	111.978	90.3543	203.695	119.292	102.966	93.9739	98.2243	94.6194	86.8998	955.956	181.173	171.671	154.313	181.671	175.665	129.381	477.885	354.988	208.877	148.4	121.154	109.493	95.9076	104.498	117.121	153.475	149.212	136.13	107.905	118.962	84.5924	72.8652	63.9263	63.0994
1186	0.15	0.5	7	80.3788	87.9144	97.3351	94.3029	87.7033	85.2958	88.2985	87.5921	84.6827	87.499	84.6757	26.5317	21.4827	20.6347	29.1212	26.3272	35.5875	35.5806	36.805	36.6676	35.4549	36.6351	35.453	36.6348	36.6891	33.1386	36.699	35.536	73.0443	70.7805	73.1878	72.8718	59.9413	15.7493	23.9765	72.8698	72.8697	65.8178	72.8771	70.5955	122.236	118.439	122.356	122.109	118.13	118.524
355	0.45	0.1	1	191.204	132.109	187.334	352.745	416.169	247.301	174.639	142.311	110.014	56.2728	152.688	164.763	146.651	142.883	179.98	276.267	507.57	198.006	299.113	278.851	219.297	168.736	106.339	169.58	137.789	151.035	199.195	301.054	391.078	324.661	127.583	117.193	30.772	35.3045	144.929	158.74	170.605	172.667	200.595	379.194	969.529	535.933	387.863	363.606	310.698	296.174
1302	0.1	0.5	10	22.0789	19.2988	20.6384	17.3716	19.7946	14.7313	14.1115	17.4383	30.1191	37.6131	41.8667	39.0218	40.4849	35.2358	73.6107	47.2897	40.0802	244.717	36.7103	29.0776	25.3203	28.4507	26.9285	24.316	21.9948	21.7002	20.5791	17.3169	22.4789	14.8698	16.479	16.9459	16.0078	16.5904	16.8688	20.7457	26.9793	42.3042	57.8149	23.089	19.8712	18.3133	18.1882	18.1868	16.5478	17.4405
1231	0.25	0.5	6	142.773	97.8371	68.8423	59.8275	55.3732	40.2714	30.2532	22.9903	18.2766	18.4831	17.7188	19.0205	18.509	16.7791	19.9687	20.5791	45.6711	279.669	63.8614	40.2004	31.704	43.8361	86.159	62.3395	54.0049	65.1175	59.0287	47.2322	52.313	43.1079	36.4182	26.7464	20.1044	19.1071	24.4065	285.754	75.5688	161.466	93.944	70.7214	58.0972	51.7161	41.4172	31.4118	24.6578	21.961
1140	0.05	0.1	0.05	0.452316	0.408543	0.452316	0.420242	0.432655	0.316198	5.77681	3.69368	1.9419	0.956431	1.20325	2.90014	0.957331	0.864686	0.957331	0.92624	0.92885	1.0366	0.149569	0.364211	0.401125	0.449277	0.438137	0.452741	0.452971	0.264476	0.203106	0.0701374	0.452971	0.412105	7.18428	7.66616	4.32545	1.01253	0.990514	1.02353	2.5086	9.2422	10.2324	3.96094	1.01293	0.862172	0.0324564	0.249862	0.307416	0.382194
1296	0.05	0.1	6	32.6845	20.3017	17.0538	14.2213	18.3916	12.3834	10.5941	9.63913	8.75013	8.42034	7.6631	8.05665	8.476	11.1095	11.4497	9.45819	9.09389	47.063	12.9434	10.6466	9.25221	20.9075	29.5299	13.3389	13.0617	12.0503	13.0807	13.2058	34.7885	12.9791	10.9421	9.56873	8.72426	8.4854	9.00359	35.2284	26.4237	47.7615	48.8369	21.8522	49.6085	15.3744	12.8932	11.052	9.47983	9.19698
1277	0.05	0.5	5	1.06089	0.958223	1.06089	1.02676	1.07414	1.1544	35.4909	4.40176	2.88786	2.78559	2.66733	8.35764	7.56194	8.89672	17.1764	14.6985	8.44086	23.4463	27.4401	4.55426	4.78542	3.26839	3.14264	2.49799	2.49762	2.25609	3.94845	4.62664	11.0671	5.09784	0.817937	1.12818	1.03072	1.06184	1.02713	1.06136	1.06132	0.958608	1.06133	1.03939	1.08187	1.11705	34.0915	25.4053	3.029	3.05925
1280	0.75	0.1	7	24.917	17.4793	19.2974	5.32923	12.8414	8.87269	2.69344	1.65854	114.444	62.2331	27.4558	43.9694	38.7521	28.3117	44.5965	275.657	301.381	292.969	260.825	38.9919	41.3733	148.25	57.909	50.5363	50.4366	56.1349	42.4653	13.2999	18.5278	17.9825	17.3969	13.5822	12.3576	12.5593	11.986	12.3585	13.5832	15.9637	17.5072	89.2066	93.4745	92.7672	24.0245	14.2673	12.9764	18.2522
182	0.95	0.1	1	108.718	514.19	224.733	124.624	111.513	112.638	116.432	115.574	106.836	108.718	105.211	108.718	108.734	98.2118	108.734	105.411	46.1098	47.0215	48.8362	47.912	44.2715	44.9657	43.5152	44.9657	129.107	476.703	408.012	488.086	159.671	113.252	118.078	116.254	107.782	109.571	106.037	408.853	391.818	509.952	695.356	290.288	149.093	116.269	119.479	116.985	108.707	110.599
1152	0.25	0.5	5	0	0	0	0	0	0	0	0	0	0	0	0	0	0	0	0	0	0	0	0	0	0	0	0	0	0	0	0	0	0	0	0	0	0	0	0	0	0	0	0	0	0	0	0	0	0
1295	1	0.1	10	67.7746	67.3494	41.7512	30.351	33.945	20.2677	15.0742	10.8005	8.7856	8.38899	10.197	14.6456	23.6449	29.2548	19.4638	14.3558	24.4903	73.4165	30.4729	17.8104	15.1348	17.9677	92.7757	27.4993	35.7928	29.1877	35.8742	75.218	81.8949	31.3934	23.7902	17.5352	12.4845	14.1154	118.823	131.957	67.6927	134.897	114.921	33.1305	101.383	27.1068	23.3611	20.8424	19.2843	15.1738
629	0.05	0.5	0.4	2032.06	4195.78	4072.24	2086.38	3354.69	4744.8	2217.12	1297.59	1324.71	1740.17	1689.29	1746.55	1744.45	1570.73	1751.15	1609.38	1637.11	1566.68	1667.71	2386.45	1589.49	1597.26	1590.59	1601.75	1697.33	1531.09	1592.06	1567.01	1623.81	1524.14	1542.81	1233.06	1115.72	1153.76	1117.24	1514.07	1355.71	1294.05	1533.53	1246.55	1254.96	1181.73	1267.83	2356.36	1339.99	1473.86
1266	0.7	0.1	5	13.5594	22.2937	17.2627	16.2425	24.4537	14.7334	10.1072	8.47366	7.68344	7.01395	5.90623	5.03954	4.18965	4.20937	5.602	5.14457	6.86492	9.07725	9.83519	7.01277	8.97689	8.07444	8.57106	7.16273	7.1047	7.59204	9.04335	10.0316	15.762	11.622	9.2437	6.64556	5.33916	5.97396	6.48004	32.9364	21.0369	75.336	43.4658	21.1678	44.3815	17.4887	15.0063	13.6932	11.761	10.6576
1176	0.05	0.5	9	5.02865	5.22981	4.90753	5.04239	12.9384	23.5279	37.1526	31.8392	262.31	56.4776	186.958	124.847	24.3078	22.9269	52.489	27.2165	26.154	32.395	38.2818	27.6878	16.9882	54.4886	16.3146	15.7536	17.3202	23.1095	19.2779	12.617	134.908	152.925	69.432	55.8216	36.2122	22.7639	14.525	12.653	38.767	80.0761	30.4899	21.7615	23.3414	34.9806	40.9531	34.8858	17.981	125.841
758	0.05	0.5	4	67.2657	60.7167	66.862	63.8335	64.8293	59.8147	61.964	61.1425	58.7748	60.9784	59.2204	61.4917	61.581	55.6521	61.4622	59.4724	61.2992	48.6531	51.5926	50.9389	49.4195	52.0743	51.1635	53.4057	53.9737	48.7517	53.8357	52.2646	53.7528	50.6405	52.5269	51.9971	49.2167	52.0159	51.4579	53.3902	53.6342	48.0419	52.7013	50.1769	50.4743	60.1177	63.2732	62.2911	59.0489	61.3391
1242	0.05	0.1	7	7.23942	6.63304	6.45463	2.99837	2.90759	3.63579	4.06406	3.25026	290.509	159.442	39.9832	43.1234	41.5461	33.715	31.9509	27.5876	15.2772	5.89971	5.82769	19.6696	43.0863	13.4626	11.7691	11.1352	12.9094	9.25587	7.50607	3.12316	2.48778	2.73476	2.81013	2.52278	1.85775	0.991176	1.07685	10.3344	138.237	89.9394	21.2222	30.1831	3.00208	1.90223	1.8092	1.3264	0.8136	8.60931
1236	0.05	0.5	0.05	1.11442	1.044	1.1892	1.15094	1.25995	1.54963	2.48412	1.67691	1.67307	1.27176	1.22847	4.59597	5.79145	4.85041	9.0339	9.18544	8.0557	6.94541	2.32218	1.91242	1.44961	9.0066	3.44139	3.33384	3.02491	2.96825	3.47506	3.19027	3.30021	5.52246	46.8925	45.5183	10.3005	7.61226	6.41861	5.48662	4.47002	5.18359	8.66799	10.0065	9.45288	7.72484	2.18732	1.86585	1.40359	1.22449
1194	0.25	0.5	9	11.9315	15.6622	16.3432	13.8648	12.7523	10.8807	9.08132	7.5225	6.39255	12.3941	10.834	13.6677	12.367	9.69287	12.2292	12.0114	11.4956	10.7094	9.47678	7.91358	6.66201	129.484	33.7452	26.9761	22.6917	27.5167	25.3421	20.228	80.2696	44.4771	28.4275	22.1508	16.7922	14.11	11.5187	10.665	10.1107	9.4133	11.127	11.2937	10.6574	9.87476	8.67165	7.267	5.94393	5.4079
[truncated: 434 more columns]

## Sheet: Storage(WG inflow-With Demand)
grand_id	a1	a2	a3	1980-01	1980-02	1980-03	1980-04	1980-05	1980-06	1980-07	1980-08	1980-09	1980-10	1980-11	1980-12	1981-01	1981-02	1981-03	1981-04	1981-05	1981-06	1981-07	1981-08	1981-09	1981-10	1981-11	1981-12	1982-01	1982-02	1982-03	1982-04	1982-05	1982-06	1982-07	1982-08	1982-09	1982-10	1982-11	1982-12	1983-01	1983-02	1983-03	1983-04	1983-05	1983-06	1983-07	1983-08	1983-09	1983-10
610	1	0.5	4	36700	36700	36700	36700	36700	36700	36700	36700	36700	36700	36700	36700	36700	36700	36700	36700	36700	36680.8	36603.8	36258	35943.5	35663.9	35403.9	35154.5	34919.4	34979.1	35451.9	35745.2	35396.4	34872.5	34336.3	33882.4	33571.3	33298.8	33063.2	33051.1	33334.8	33834.2	34799	35958.9	36158.4	35789.9	35410.9	35502.2	35769.7	36051.4
1294	0.35	0.1	6	2014.19	1990.72	1965.94	1940.98	1916.45	1890.37	1861.86	1834.68	1810.81	1790.59	1770.3	1753.45	1734.06	1716.42	1701.75	1687.52	1671.62	1668.61	1660.7	1642.89	1627.86	1614.6	1603.52	1589.89	1575.16	1561.6	1547.34	1531.5	1516.42	1498.17	1478.97	1459.23	1441.04	1424.96	1409.88	1395.81	1381.22	1370.16	1361.33	1350.62	1335.47	1321.63	1306.04	1290.29	1274.61	1260.77
1247	0.25	0.5	4	1172.49	1158.3	1142.23	1125.55	1110.8	1091.53	1066.88	1042.44	1021.51	1019	1007.04	1002.53	992.458	980.62	971.304	959.865	947.231	936.487	921.337	903.887	889.819	891.612	897.919	890.684	881.981	875.81	868.699	860.179	857.183	857.124	851.014	837.647	823.363	811.997	804.162	797.493	789.229	782.133	774.611	766.013	756.849	747.598	734.127	721.004	709.52	700.345
1186	0.15	0.5	7	304.151	494.596	509.624	556.943	603.984	590.71	542.708	478.25	407.97	342.529	277.548	244.91	245.088	245.084	245.129	244.879	252.34	373.937	405.946	405.575	401.267	395.051	398.866	399.821	396.605	440.22	475.48	485.4	472.988	435.939	388.341	329.991	266.866	245.226	245.324	462.617	544.83	648.802	788.362	831.197	782.283	708.882	619.883	515.136	405.562	295.459
355	0.45	0.1	1	190.601	173.059	175.218	255.341	578.151	740.992	592.959	384.949	246.196	175.801	191.109	235.263	262.326	270.335	310.252	477.222	865.511	1270.32	1102.13	766	488.033	298.332	181.338	172.098	172.468	171.917	173.747	230.41	398.166	534.249	443.658	273.482	175.921	174.981	215.784	302.71	412.516	513.699	673.544	919.671	1570.59	1760.6	1595.65	1245.83	973.382	827.761
1302	0.1	0.5	10	837.415	832.705	826.981	821.281	815.298	807.406	796.088	786.326	780.506	777.394	774.307	773.207	770.305	767.907	766.304	763.734	760.167	767.163	767.759	759.595	754.259	750.753	748.071	744.671	740.286	735.914	731.161	725.722	720.856	713.729	704.704	696.401	689.423	684.892	681.705	679.169	676.101	673.983	672.656	670.534	665.607	661.265	655.581	649.788	644.388	640.946
1231	0.25	0.5	6	635.624	633.874	628.27	622.259	614.837	603.316	589.311	577.624	568.635	562.083	555.854	550.62	544.365	538.595	532.892	525.836	520.698	524.362	519.064	510.008	503.78	500.315	498.666	495.106	491.145	488.295	484.284	479.785	475.517	469.826	463.668	455.92	448.797	443.432	440.626	446.984	445.675	444.583	445.491	442.298	438.299	435.113	430.668	425.128	419.983	414.907
1140	0.05	0.1	0.05	133.349	133.776	133.379	132.741	133.579	135.42	133.117	128.589	127.677	127.767	127.565	128.096	127.165	126.448	127.09	126.741	127.017	127.885	128.208	129.063	129.509	129.687	129.487	129.039	128.527	128.332	128.302	128.08	130.707	136.989	141.554	134.994	128.647	127.104	126.171	126.069	127.307	139.367	134.46	128.339	127.266	127.486	127.864	128.311	128.318	182.243
1296	0.05	0.1	6	1050.11	1056.15	1055.06	1053.09	1051.38	1048.57	1041.15	1033.38	1026.86	1022.39	1018.15	1014.48	1010.12	1007.39	1003.98	999.048	995.069	1003.18	1004.45	997.799	993.502	990.068	998.289	999.304	997.156	995.164	993.087	990.586	994.952	994.34	988.905	981.952	975.846	971.908	969.07	975.688	977.636	988.16	1000.1	1009.31	1013.88	1021.07	1016.68	1011.54	1007.18	1003.03
1277	0.05	0.5	5	139.579	142.554	144.378	146.574	157.322	164.831	143.513	123.504	121.965	121.744	120.51	124.44	124.663	124.662	125.466	125.378	124.514	138.582	134.297	124.502	124.577	124.61	124.398	123.933	123.121	123.575	124.434	124.43	124.91	124.552	125.035	125.217	125.282	125.366	125.696	127.232	131.025	141.45	155.382	168.603	174.728	178.977	163.588	132.829	123.34	122
1280	0.75	0.1	7	118.821	118.635	116.174	120.409	127.802	132.048	121.319	120.935	271.954	618.104	675.14	764.991	854.614	928.601	1013.56	955.241	731.278	480.152	206.543	116.025	115.57	116.663	116.226	116.3	116.507	116.061	116.519	129.79	156.345	181.555	206.459	212.502	219.784	229.766	241.247	253.621	265.934	287.809	310.899	292.487	224.553	156.078	119.34	119.553	119.644	119.623
182	0.95	0.1	1	766.607	1048.64	1097.95	1097.06	1073.43	984.123	867.298	758.857	665.305	575.763	486.775	400.855	311.705	305.157	365.054	452.895	442.668	404.736	340.799	290.782	257.999	230.108	271.932	605.815	1084.1	1102.7	1102.69	1102.7	1101.94	1076.88	1023.96	924.844	843.74	772.307	785.623	1076.85	1085.3	1100.43	1101.78	1099.13	1098.84	1090.79	1014.1	916.632	839.885	766.678
1152	0.25	0.5	5	0	0	0	0	0	0	0	0	0	0	0	0	0	0	0	0	0	0	0	0	0	0	0	0	0	0	0	0	0	0	0	0	0	0	0	0	0	0	0	0	0	0	0	0	0	0
1295	1	0.1	10	667.528	669.526	667.925	666.555	664.283	659.341	649.578	640.923	634.993	634.54	634.091	634.502	633.575	634.177	631.788	627.784	628.305	630.496	627.908	619.362	618.703	617.329	623.143	623.787	623.6	622.952	622.497	622.906	626.542	622.216	614.623	608.05	601.27	601.179	604.36	613.336	617.291	621.635	625.351	625.47	624.515	625.579	622.115	620.105	618.792	616.041
629	0.05	0.5	0.4	37.9439	62.3836	61.8028	26.6036	13.8132	0	22.2767	256.18	646.485	803	803	803	803	803	803	803	803	803	803	366.427	34.6952	37.8891	36.5374	36.0106	35.8805	32.7305	35.3129	21.515	19.9778	21.1152	32.6312	161.518	359.934	534.86	714.517	803	803	803	803	803	798.081	800.674	803	365.102	39.3981	37.7698
1266	0.7	0.1	5	68.9122	69.8344	69.0358	69.1315	70.1752	69.2761	68.5621	68.5872	68.7218	68.7157	69.053	68.7446	68.7608	68.7733	68.848	68.7332	69.0038	70.4529	69.3051	68.6649	69.7751	69.95	69.5504	68.6502	68.6865	68.6644	68.7057	68.9981	69.659	68.6544	68.598	68.6301	68.6924	68.9696	69.2369	72.0977	71.92	75.9931	81.9682	83.2122	84.4014	86.2571	83.2452	81.5425	80.1601	77.6329
1176	0.05	0.5	9	148.138	144.343	139.486	134.29	131.258	127.425	120.513	114.851	111.74	120.357	119.854	123.173	120.549	117.307	116.128	113.55	111.469	109.85	105.486	100.786	97.8448	99.388	99.7749	96.9075	93.762	91.6788	89.6587	86.6456	89.0854	93.8335	95.6843	92.684	89.4099	86.8852	84.756	83.8129	81.8859	82.0694	80.6702	79.6072	77.6697	78.6244	76.361	73.1913	70.1014	69.5719
758	0.05	0.5	4	514.12	536.496	554.53	561.422	545.95	524.391	500.894	485.894	490.035	488.8	492.87	497.267	498.431	499.171	495.24	494.335	486.032	476.959	461.977	435.173	419.973	431.13	428.61	426.317	429.296	429.08	427.802	430.697	418.802	412.249	416.742	416.212	413.695	445.178	475.309	497.283	522.66	541.191	556.676	564.141	556.145	547.595	539.083	510.665	492.968	496.596
1242	0.05	0.1	7	536.013	532.236	527.179	520.262	509.557	488.195	448.677	402.604	387.933	495.464	505.004	511.786	518.681	523.956	527.125	527.92	523.259	503.744	472.846	445.815	436.718	432.371	428.747	426.214	423.709	421.468	416.998	410.459	401.096	372.369	319.727	269.485	237.175	225.511	220.952	219.063	238.691	269.491	280.22	280.968	275.55	256.579	210.035	155.549	124.522	116.1
1236	0.05	0.5	0.05	56.7035	57.3736	58.0112	58.1508	57.9007	54.264	53.0929	53.1955	53.058	52.8748	52.7457	53.0792	53.1573	53.1769	53.1364	53.141	53.0827	53.0577	53.3311	53.3483	53.4591	67.9386	84.9012	92.939	100.121	107.051	114.695	122.392	129.356	136.579	120.951	76.8506	52.7505	52.7523	52.7786	52.8138	52.7376	52.8286	52.7413	52.7378	52.7165	52.6435	53.3234	53.3498	53.3632	53.9175
1194	0.25	0.5	9	284.804	283.476	281.791	279.958	278.134	274.355	267.881	261.081	255.919	253.989	252.301	251.044	249.541	247.903	246.58	244.942	243.282	241.22	236.931	231.787	228.461	231.293	236.228	236.212	235.662	235.858	235.572	234.873	236.69	239.164	238.589	235.642	232.34	230.19	229.014	228.156	226.912	225.698	224.455	222.925	221.194	219.233	215.756	212.137	209.273	207.356
[truncated: 434 more columns]

## Sheet: Outflow(OBS inflow-With Demand)
grand_id	a1	a2	a3	1980-01	1980-02	1980-03	1980-04	1980-05	1980-06	1980-07	1980-08	1980-09	1980-10	1980-11	1980-12	1981-01	1981-02	1981-03	1981-04	1981-05	1981-06	1981-07	1981-08	1981-09	1981-10	1981-11	1981-12	1982-01	1982-02	1982-03	1982-04	1982-05	1982-06	1982-07	1982-08	1982-09	1982-10	1982-11	1982-12	1983-01	1983-02	1983-03	1983-04	1983-05	1983-06	1983-07	1983-08	1983-09	1983-10
753	0.95		0.05	1509.82	1363.71	1509.82	1461.12	1509.82	1461.12	1508.36	1508.36	1459.7	1508.36	1459.7	1508.36	1508.36	1362.39	1508.36	1459.7	1508.36	1459.7	1593.38	1593.38	1541.98	1593.38	1541.98	1593.38	1593.38	1439.18	1593.38	1541.98	1593.38	1541.98	3060.58	1906.26	1751.77	1810.17	1751.77	1810.17	1810.17	1634.99	1810.17	1751.77	1810.17	1751.77	1737.75	1737.75	1681.7	1737.75
870	1		0.05	1728.34	1561.08	1728.34	1672.59	1728.34	1672.59	1728.34	1728.34	1672.59	1728.34	1672.59	1728.34	1728.34	1561.08	1728.34	1672.59	1728.34	1672.59	1728.34	1801.24	1743.14	1801.24	1743.14	1801.24	1801.24	1626.93	1801.24	1743.14	1801.24	1743.14	1801.24	2164.39	2094.57	2164.39	2094.57	2164.39	2164.39	1954.93	2164.39	2094.57	2164.39	2094.57	2164.39	1865.28	1805.11	1865.28
597	1		2	992.656	966.681	1053.73	1169.4	1999.45	2007.52	1129.64	868.509	952.409	904.831	927.452	951.194	918.604	821.659	894.635	871.667	1000.86	1137.87	566.732	491.754	567.886	640.113	535.983	527.88	511.364	557.439	660.934	728.104	1226.93	1356.73	1083.42	913.402	857.951	922.707	858.38	862.598	830.419	773.459	998.15	1023.83	1765.95	2904.54	2511.76	1580.87	1250.46	1343.32
307	1		1	567.046	514.453	581.064	564.26	589.046	659.854	603.508	574.012	545.196	573.331	557.033	569.145	577.322	525.431	585.402	554.638	680.607	715.552	783.673	751.743	719.759	745.708	724.724	743.761	748.628	707.385	795.939	752.76	809.762	888.169	804.996	731.11	702.834	727.995	699.232	727.995	725.658	664.779	734.614	703.029	756.322	729.896	644.607	597.881	571.488	592.916
1753	0.3		0.7	6674.2	4013.53	13048.6	6019.04	4877.72	2805.14	2900.21	2339.51	2315.84	1922.58	2542.52	2020.4	1823.06	3523.68	1899.6	2273.05	1276.24	2926.26	2579.34	2499.14	2132.28	1891.48	1831.75	3682.17	10255.4	8319.96	6163.16	3074.69	1959.44	2006.83	2829.23	3662.59	2777.59	2573.7	3851.56	10119.6	5766.03	6162.27	3986.59	8023.23	8230.1	4041.26	3312.12	3086.67	1963.49	1598.22
297	0.65		0.75	741.558	135.947	213.42	525.498	1227.2	1164.21	1162.39	729.42	702.117	724.183	698.627	723.441	723.201	650.234	344.535	455.104	796.533	770.881	785.46	1346.03	1287.05	1326.67	1281.08	1321.47	1051.44	273.922	324.88	398.576	1220.46	1376.67	1365.88	814.064	782.085	804.637	773.408	798.962	799.001	721.046	707.172	503.604	852.725	834.755	843.151	954.607	914.501	941.724
1036	1		2	124.514	216.463	416.666	380.091	267.829	421.745	355.662	230.7	141.3	67.2997	128.663	59.4604	58.4496	114.016	108.164	80.3847	167.24	147.921	132.031	176.292	62.8549	108.307	112.567	143.701	410.665	897.33	552.99	314.275	200.532	585.72	316.23	300.841	144.483	134.712	298.107	1807.05	428.699	581.532	564.451	904.218	953.822	440.609	599.302	484.122	185.121	89.4918
989	0.1		2	71.0355	434.916	840.445	1352.5	233.601	134.134	45.353	126.68	31.7127	35.5813	19.9646	46.7039	31.3251	34.0329	31.949	47.1832	616.307	2611.79	1188.02	493.481	175.822	518.01	716.268	494.066	578.163	1173.43	1087.75	323.626	1424.22	2242.45	510.392	789.633	216.822	143.883	127.666	1549.38	369.315	601.293	745.097	3651.02	2164.58	854.656	340.946	85.0414	103.283	293.857
1026	1		8	102.425	256.644	327.13	254.027	181.358	219.222	116.17	132.91	59.4427	53.9451	78.7554	73.8711	49.7526	61.5958	90.6324	113.479	213.614	357.696	224.068	287.45	125.119	127.692	129.068	144.686	311.541	517.222	272.121	239.612	207.383	427.35	189.729	247.321	108.859	111.79	166.669	1003.42	170.211	395.996	323.619	630.919	560.365	229.206	340.518	182.51	122.719	149.045
1848	0.15		3	236.361	226.648	243.646	242.837	226.18	218.884	226.18	226.18	218.884	226.18	218.884	167.081	88.2831	151.759	153.948	205.751	14.6975	14.6487	15.137	15.137	14.6487	15.137	14.6487	15.137	15.137	13.6721	15.137	14.6487	339.189	328.247	339.189	339.189	328.247	339.189	328.247	339.189	339.189	306.364	339.189	328.247	313.855	303.731	313.855	313.855	303.731	313.855
1869	0.3		0.05	237.314	207.401	255.262	299.136	302.397	292.643	302.397	302.397	292.643	205.825	73.1607	30.2397	30.2397	123.885	109.253	90.7192	18.0998	24.6816	25.5043	25.5043	24.6816	25.5043	24.6816	25.5043	25.5043	23.0362	25.5043	24.6816	280.08	271.045	280.08	280.08	271.045	149.978	75.8927	280.08	280.08	252.976	280.08	271.045	434.279	420.27	434.279	434.279	420.27	434.279
7313	0.25		2	295.803	302.343	343.968	402.538	634.577	709.768	385.773	274.381	352.522	376.007	380.648	358.001	338.034	304.853	341.862	359.269	736.38	888.052	384.04	293.063	291.123	393.536	386.473	368.468	334.777	354.993	394.278	435.127	686.001	932.644	617.076	326.426	376.679	429.131	415.922	377.801	383.349	338.082	400.768	410.96	521.746	686.902	600.469	370.325	393.463	468.914
1042	0.8		0.05	83.2121	110.995	153.768	174.212	118.977	120.4	73.7758	63.7986	64.2096	46.5893	44.2437	42.3807	42.0615	49.4512	70.1304	76.1685	97.9537	82.9044	64.1576	61.7248	23.4692	48.5149	35.4417	39.1065	90.4258	211.219	110.674	97.3316	141.326	144.363	100.79	78.8756	64.0321	67.8009	104.975	570.508	121.871	108.215	115.486	290.781	312.732	148.051	133.202	109.613	100.468	116.985
884	0.05		2	1918.41	1282.63	1620.53	1555.3	2159.97	2021.76	2448.29	2742.73	2154.12	1932.9	1884.9	1148.76	1408.45	1403.53	1752.09	2523.75	2274.03	1833.76	2166.08	2380.52	1753.6	1494.15	1108.2	1297.58	1461.5	1079.12	1456.62	1741.2	1681.54	1300.09	1923.59	2354.47	2276.67	1782.55	1889.36	2067.52	2225.51	1621.41	1351.23	742.393	975.447	1583.32	1487.69	2772.87	2004.6	2039.81
1144	0.15		0.85	1285.74	1559.15	1134.01	1056.74	1217.32	868.818	582.813	424.682	393.037	1383.95	871.055	1322.18	826.063	824.989	1026.43	797.865	889.983	1940.02	984.662	752.457	615.279	2062.04	1874.16	1289.42	1006.83	2386.34	1499.64	966.662	2381.91	2997.89	1608.18	1074	871.545	821.957	848.567	4188.57	1602.75	1978.85	1830.95	1349.4	1764.62	1186.46	1094.11	844.44	713.92	695.605
1006	0.05		7	16.2421	73.7254	127.4	128.586	44.0639	18.3284	5.39344	7.69639	4.77025	12.2002	6.31155	8.44382	5.32243	9.08013	11.7307	12.2888	45.5613	214.476	98.8688	74.6027	10.324	61.0458	76.5396	47.8007	103.243	137.911	86.9326	58.1082	95.7206	136.741	29.4636	81.2381	37.0362	20.1383	42.1053	254.627	90.6351	62.9189	39.6386	304.794	195.466	111.124	106.13	11.7928	13.5194	143.282
1048	0.3		2	247.948	257.703	403.57	1417.87	1153.31	1033.22	121.533	115.859	35.6874	73.7231	41.1937	72.7574	103.423	60.1625	69.7874	57.4916	263.09	354.708	274.411	178.188	150.054	236.501	703.003	167.805	165.245	391.147	484.604	169.612	2317.16	2076.95	935.817	231.953	67.625	54.3573	69.0735	102.649	176.538	268.255	549.839	1571.09	1241.39	859.985	641.705	84.168	109.408	481.254
1032	0.65		2	37.0641	116.632	323.76	459.68	98.8019	29.0246	11.0227	17.8268	16.8616	15.0713	5.60067	11.9329	6.6632	11.3253	14.5586	35.1524	73.8259	116.152	84.5725	38.3349	55.9437	58.3395	151.293	51.6307	109.847	195.877	213.462	43.246	446.566	882.887	196.681	57.262	22.1957	17.7689	33.5993	154.193	119.455	385.401	288.713	1174.54	506.436	166.059	64.5686	6.2929	8.21107	163.452
355	0.5	0.1	2	158.481	156.225	189.816	172.887	234.903	344.33	334.011	244.643	240.699	197.82	184.051	179.714	171.365	152.106	166.932	137.006	271.523	457.401	245.603	207.616	188.307	202.692	184.833	187.536	167.977	176.274	215.934	168.345	182.588	381.271	402.837	266.536	238.453	285.595	223.639	217.046	233.59	215.115	209.676	172.945	258.073	494.709	525.826	299.293	264.321	284.148
1101	0.05		5	92.1314	83.2154	279.366	784.603	118.879	12.6735	13.501	13.501	13.0655	13.501	13.0655	13.501	13.501	12.1944	13.501	13.0655	13.501	437.916	452.513	163.489	83.204	45.2513	43.7916	45.2513	84.6638	224.797	150.351	175.166	97.8012	10.3217	13.501	13.501	13.0655	13.501	13.0655	13.501	13.501	12.1944	32.0023	327.967	375.702	914.259	844.967	92.5582	89.5725	54.3299
1023	0.05		4	140.866	164.025	306.85	652.674	172.827	104.559	37.721	71.6604	33.1416	32.2854	31.9156	44.3119	39.6869	37.0736	47.1804	43.0172	135.549	174.773	128.264	107.681	58.5456	118.019	405.27	100.164	70.0991	230.98	221.236	93.5833	567.474	914.173	258.02	72.4587	43.8808	41.0631	42.4929	55.7496	61.9473	118.782	329.229	841.609	367.747	402.504	328.704	56.6581	46.2434	78.0285
1864	0.4		1	103.554	89.735	158.367	132.965	99.0914	94.6249	93.9312	92.8571	91.323	95.0122	96.3196	48.0691	25.7052	79.0561	66.3932	61.6495	19.919	18.0161	17.7669	16.5325	16.205	19.0082	15.9222	16.7958	31.472	23.3474	20.3766	44.7428	101.486	99.3204	98.8908	109.872	110.468	114.135	106.751	190.085	116.852	119.07	123.197	142.515	228.38	175.374	184.188	178.33	183.348	180.15
1021	0.05		4	22.2234	19.3926	31.7192	76.101	58.0905	95.4073	7.97608	5.62462	1.43699	1.64146	0.779906	9.38236	6.71559	4.00764	12.5825	6.48449	62.9349	28.5722	11.6039	14.1107	49.4091	22.2681	113.325	14.5106	11.8437	27.9674	32.3171	13.202	182.999	179.541	146.449	9.39144	3.17403	4.4584	7.36815	9.54905	9.31875	17.9275	54.2895	93.7454	57.4406	134.103	23.1173	3.45616	16.1855	14.2929
1120	0.05		9	4.75693	5.41057	6.33462	5.16199	15.4937	7.23276	3.37736	3.18761	5.57371	3.70046	3.66845	4.58175	3.40062	4.79984	6.31925	7.45277	11.4481	22.0741	5.21904	5.50754	6.55596	21.5837	4.71018	3.23949	7.0275	5.62242	11.7428	6.16009	125.614	56.999	24.2945	5.22985	4.01422	3.05971	4.54852	6.33911	7.11086	12.5285	8.12605	8.52224	30.0525	13.2351	3.70172	3.57151	2.86059	152.94
182	0.9	0.1	0.75	826.609	858.725	586.856	495.562	470.036	256.405	216.497	215.622	203.559	208.633	201.903	208.633	208.649	188.458	208.649	202.106	144.044	143.425	148.622	147.07	138.808	142.122	137.538	443.834	750.419	1055.81	893.059	1343.67	904.098	442.259	239.739	218.281	206.398	211.429	310.622	752.674	615.318	927.706	1488.43	843.967	983.802	899.68	448.9	236.115	207.563	212.713
7311	0.05		4	2.76561	13.8865	76.883	40.4646	13.1686	1.3553	0.0311665	0.58807	0.0248639	0.124816	0.0655306	0.835093	0.0261164	0.307075	1.01136	1.62243	13.6468	16.8092	2.63618	2.34901	0.492949	5.28296	14.8051	3.38465	3.68269	11.5053	26.8171	1.68449	88.2667	194.153	11.1462	5.92894	0.528951	1.29283	0.746354	21.2572	7.20109	57.2075	60.5148	143.75	61.2197	12.4975	3.13111	0.0311665	0.284566	12.1793
1755	0.5		0.85	129.787	124.912	217.638	170.212	53.2064	46.827	46.2531	23.7604	15.3492	11.5006	15.6224	27.225	33.1097	92.1257	59.8237	60.345	120.243	161.59	115.552	112.971	107.823	24.1336	34.7457	126.749	184.443	152.096	130.09	128.253	124.544	114.332	115.154	48.9873	131.295	24.4436	24.9604	156.471	130.815	132.866	123.971	154.233	201.304	81.9211	73.399	70.1529	66.8454	72.5989
1192	0.05		5	371.655	446.201	263.954	420.727	396.695	91.844	43.9519	40.2522	45.0477	45.852	64.0939	71.5995	59.1592	77.5563	98.0674	77.5676	259.843	500.479	115.5	54.2382	50.6328	107.074	78.8059	65.6748	87.5831	173.001	117.241	100.951	134.946	130.627	94.5786	42.5457	54.7271	64.1371	94.9864	480.961	180.892	488.362	377.789	197.529	154.78	97.7754	144.242	58.5329	42.8665	45.3505
541	0.15		1	97.2744	87.4543	98.3617	118.402	179.397	218.319	135.372	105.823	99.8841	99.9934	93.073	95.6897	93.8264	84.9821	94.6904	95.1911	104.565	118.583	43.3776	37.3725	33.7048	32.4441	30.1104	30.7752	30.7695	27.2642	34.1006	45.175	84.1424	117.671	127.234	113.336	104.519	100.215	88.3637	88.3825	88.4194	79.7034	92.8122	95.6155	133.959	210.309	163.612	131.651	106.677	105.802
1716	0.4		2	31.5449	43.2337	89.656	31.1584	22.8845	8.61415	10.0883	8.46349	7.2458	7.03106	6.96747	12.0746	10.3623	33.0171	13.0553	11.7231	53.8346	103.946	38.7514	15.3219	12.0293	12.1964	9.11189	28.7594	102.048	134.805	50.2899	30.0965	22.6962	21.1855	16.0082	9.92452	13.631	11.0364	12.3882	173.807	62.6386	59.4845	66.4727	107.613	116.481	89.6643	21.6693	14.1109	9.33843	79.1317
1883	0.2		0.8	61.738	50.9669	55.9179	77.9829	80.1268	47.8836	51.0163	41.7949	16.9772	19.1325	39.0033	39.2953	38.9127	38.2158	46.8643	46.877	61.4913	88.6347	52.4006	49.9504	46.0928	44.6096	38.6657	38.5131	40.8807	39.0393	46.8711	50.8376	48.2294	38.9073	23.0763	18.4916	13.5624	12.263	11.4697	81.8229	41.2917	154.575	61.7554	44.1294	79.1593	62.218	50.9718	50.3227	45.2796	40.9744
895	1		0.45	1443.41	1074.61	1569.85	2112.87	2311.67	2159.83	2597.31	2679.47	2517.28	2636.12	2448.64	1218.25	1040.5	892.337	1695.37	2422.15	2462.71	2305.34	2520.51	2407.08	2457.43	2543.16	1389.51	1088.44	1127.94	919.866	1363.01	2100.01	2199.95	1957.91	2310.74	2371.96	2332.66	2574.27	2840.85	1972.15	1820.42	1492.98	1625.33	1203.09	1861.36	1571.58	2094.99	2647.81	2569.39	2671.9
1093	0.1		1	27.4461	44.8243	39.4201	72.3329	160.981	38.0172	1.37754	1.3112	1.34622	25.6025	10.7882	53.035	6.98945	43.2417	90.7086	37.5418	169.078	242.363	64.1045	26.6714	5.98761	146.781	53.4659	26.4394	150.699	204.288	109.233	31.8737	294.072	176.843	28.9782	6.84923	1.78002	4.10222	23.4064	302.108	50.5525	90.9576	95.8799	135.207	375.097	46.0656	44.6411	4.73448	1.60712	2.29618
1709	0.2		1	167.141	155.844	298.812	254.012	147.903	59.0258	123.739	94.9033	37.3282	47.4329	101.021	97.5746	68.9862	256.051	206.985	273.288	298.992	314.257	78.457	121.051	74.4225	114.629	95.7567	213.206	239.97	314.351	429.558	156.41	105.068	231.876	87.2562	70.9078	47.1146	72.7679	141.702	186.073	82.8071	154.483	244.669	285.791	208.88	106.568	133.497	36.3666	28.899	76.7826
1017	0.1		1	33.1252	42.6226	49.9781	55.2682	35.5282	26.2522	20.8343	23.2856	23.4185	23.0857	24.2826	26.1394	24.2905	25.379	27.1886	32.6735	77.5339	46.8453	53.4642	26.6534	20.7039	22.8135	43.1677	30.3537	44.5179	123.11	51.873	53.1163	37.5452	57.0416	44.1195	90.7148	75.3797	56.4965	54.8063	291.475	74.836	54.32	49.5962	134.948	298.847	73.109	63.8214	60.3505	58.5129	65.3563
[truncated: 434 more columns]

## Sheet: Storage(OBS inflow-With Demand)
grand_id	a1	a2	a3	1980-01	1980-02	1980-03	1980-04	1980-05	1980-06	1980-07	1980-08	1980-09	1980-10	1980-11	1980-12	1981-01	1981-02	1981-03	1981-04	1981-05	1981-06	1981-07	1981-08	1981-09	1981-10	1981-11	1981-12	1982-01	1982-02	1982-03	1982-04	1982-05	1982-06	1982-07	1982-08	1982-09	1982-10	1982-11	1982-12	1983-01	1983-02	1983-03	1983-04	1983-05	1983-06	1983-07	1983-08	1983-09	1983-10
753	0.95		0.05	24353.1	24108.1	24057.5	24093.6	23815.2	24230	24940.8	24938.9	24933	25121.1	25194.6	24748.4	24546.6	24398.8	24431.7	23929.7	23475.3	25171.8	26531.3	26443.3	25985.9	25692.3	25554.1	25370.1	24882.2	24740	25299	26477.6	26959.4	28415.2	30178.6	30157.2	29707	29616.8	29423.7	28959.5	28573.4	28377.6	28783	28457.2	27755.7	27988.9	29093.7	29232.1	28629.2	28102.2
870	1		0.05	21064.5	21340.9	21921.1	22140.7	21690.4	21382.8	21159.5	21054.1	20940	20902.7	21120.6	21338	21304.9	21688.2	22161.6	21905.7	21372.1	21337.4	21645.6	22071.7	21828.8	21430.9	20824.1	20544.3	20359.5	20951.3	22133.4	23757.7	24591.3	26129.1	26369.7	26108.1	25450.1	24971.9	24930.8	25066.1	24506.7	24286.7	24956.4	25181.2	24860	24032.4	23224.2	22709.1	22736.9	22268.5
597	1		2	6619.5	6376.49	6279.52	6088.17	6953.53	8567.48	9236.69	8699.69	8236.1	7766.92	7345.6	6960.03	6555.53	6115.59	5684.66	5181.21	4817.52	4751.24	4594.94	4398.23	4293.07	4341.65	4321.64	4235.07	4079.75	4032.73	4151.34	4259.33	5007.04	6234.96	7102.76	7095.73	7093.48	7115.7	7150.49	7155.86	7047.3	6999.28	7102.24	7276.94	8119.6	10803.1	13669.8	14173.5	13666.9	13142.4
307	1		1	5015.16	4872.42	4779.91	4785.48	4697.91	5257.83	5866.59	5729.84	5493.87	5309.88	5268.48	5126.48	5080.16	5020.54	5074.9	5024.35	5217.61	7040.4	7718.91	7340.97	6820.39	6395.47	6033.54	5698.84	5320.25	5183.23	5377.37	5511.12	5561.83	6697.36	7799.93	7692.74	7386.07	7146.49	6914.69	6698.09	6480.76	6301.8	6215.24	6007.63	5910.61	6002.8	6215.09	6229.88	6054.89	5873.05
1753	0.3		0.7	4572.48	4573.54	4573.08	4570.82	4502.34	4416.73	4345.79	4243.52	4176.53	4155.86	4150.76	4162.12	4142.76	4164.14	4154.94	4136.64	4105.42	4146.81	4093.54	4037.87	4002.73	3958	3938.76	3942.88	3988.49	4044.84	4053.82	4047.46	3986.91	3915.37	3853.91	3790.13	3828.6	3794.44	3763.7	3865.54	3914.08	3929.82	3912.91	3941.03	4029.62	4002.33	3920.43	3806.34	3705.97	3666.47
297	0.65		0.75	908.367	723.513	723.39	746.628	1920.47	3151.66	3372.72	3083.01	2809.17	2492.04	2109.41	1677.39	1385.78	951.354	731.539	742.88	1475.34	3647.34	5258.29	5711.53	5031.63	4133.89	3158.05	2119.04	1033.26	720.201	718.834	719.993	911.537	2315.53	3557.89	3514.51	3345.29	3087.11	2703.85	2229.55	1761.65	1287.11	873.931	743.809	1132.9	2824.51	3799.6	4063.33	3687.96	3145.16
1036	1		2	663.002	662.383	661.629	659.846	661.269	662.483	659.73	659.592	661.408	663.944	662.172	663.606	662.465	662.034	663.743	663.883	662.508	661.752	662.657	663.87	663.537	662.998	662.922	661.82	663.681	734.357	725.769	686.985	662.86	663.97	665.776	663.577	662.025	663.195	664.154	857.673	929.146	888.588	870.158	900.889	986.765	939.623	849.233	738.346	660.811	661.271
989	0.1		2	637.153	631.462	630.445	623.452	632.41	636.207	639.915	653.667	662.974	662.025	668.726	671.704	668.705	671.973	673.47	673.233	707.655	838.205	906.9	715.245	635.995	631.875	628.575	628.644	630.69	622.036	631.118	632.031	619.254	616.759	632.084	637.839	634.599	636.457	636.696	651.808	631.968	628.573	633.359	751.068	833.279	785.506	668.517	637.26	637.438	635.593
1026	1		8	2240.27	2229.44	2230.04	2243.97	2224.22	2207.17	2182.65	2147.85	2114.17	2080.63	2060.5	2040.21	2011.08	1986.24	1962.52	1936.91	1929.09	1940.19	1950.2	1955.34	1945.75	1933.89	1936.34	1922.45	1922.75	1992.39	2000.92	2007.85	1997.59	2013.93	2023.47	2016.94	2012.36	1992.83	1979.51	2098.16	2128.9	2137.81	2158.25	2204.37	2277.74	2277.92	2278.53	2259.68	2235.98	2217.29
1848	0.15		3	389.176	425.712	630.029	1256.4	1336.97	1213	1069.31	892.681	716.264	576.386	472.939	399.148	368.163	372.676	371.981	405.22	424.149	614.561	707.399	746.338	815.585	861.596	914.513	981.197	1169.77	1448.85	1631.71	1903.36	1955.18	1757.78	1498.22	1256.54	1032.68	891.533	670.252	922.572	1435.55	1506.7	1577.46	1807.35	2103.29	2252.14	2008.87	1764.39	1500.74	1264.19
1869	0.3		0.05	346.329	347.755	726.564	1446.82	1491.13	1300.18	1096.49	834.675	550.523	375.014	328.273	328.447	326.856	337.263	333.187	332.101	342.681	405.442	434.977	435.074	442.792	443.941	445.244	441.62	576.765	749.854	864.172	1223.06	1354.6	1118.36	899.197	686.069	495.493	342.517	337.165	851.07	1519.8	1803.93	1935.68	2178.79	2336.58	2296.22	1966.57	1614.24	1236.3	853.399
7313	0.25		2	1671.1	1602.97	1567.07	1536.22	1666.59	1951.83	2055.87	1871.72	1755.95	1730.14	1732.87	1719.36	1689.33	1639.22	1602.42	1560.08	1672.47	2175.37	2283.45	2062.1	1851.08	1751.04	1722.23	1682.9	1596.32	1529.72	1506.19	1483.73	1583.37	1919.27	2277.06	2173.39	2049.47	2052.04	2067.68	2067.07	2037.17	2005.96	1986.76	1974.3	2013.05	2212.65	2391.2	2315.19	2222.8	2215.27
1042	0.8		0.05	243.114	247.653	259.739	299.049	310.602	314.926	304.785	280.396	255.297	243.718	243.623	243.466	243.445	243.556	243.931	244.938	251.873	262.588	259.388	248.091	243.581	244.619	243.772	243.859	246.788	316.418	339.51	347.435	352.378	368.806	367.713	346.866	322.243	293.629	271.126	449.202	505.726	502.202	494.992	547.302	613.848	588.061	542.916	476.71	410.344	355.728
884	0.05		2	198.733	203.169	209.172	202.09	202.059	190.422	193.661	185.515	191.698	198.483	196.849	213.125	202.114	205.181	204.584	185.927	197.611	196.07	190.148	190.864	198.8	201.935	212.387	207.493	208.943	212.706	206.187	203.578	202.397	204.73	200.152	194.577	189.568	198.72	195.624	197.546	194.272	192.763	210.174	214.262	212.659	205.779	204.342	174.075	202.016	194.261
1144	0.15		0.85	2201.52	2211.06	2211.42	2215.9	2217.92	2210.75	2193.09	2174.32	2160.6	2173.79	2177.45	2184.95	2184.97	2187.26	2189.47	2185.72	2187.29	2193.57	2183.81	2172.15	2164.43	2166.25	2171.56	2170.73	2173.48	2182.67	2181.96	2182.13	2176.88	2173.83	2164.21	2154.18	2142.87	2142.98	2150.5	2177.19	2188.93	2195.01	2199.27	2200.85	2202.16	2196.96	2196.06	2179.69	2165.66	2160.05
1006	0.05		7	204.958	204.342	204.886	207.489	204.573	208.663	209.699	206.562	206.776	209.41	215.766	218.55	218.355	220.923	225.02	229.399	245.58	261.037	259.921	221.361	204.141	204.477	206.979	205.28	205.481	215.089	205.008	204.703	205.355	212.807	205.102	206.857	205.725	205.167	206.116	248.406	237.021	210.721	205.247	239.302	292.071	269.466	228.96	205.334	205.001	215.773
1048	0.3		2	1327.33	1319.61	1310.51	1309.19	1314.81	1315.56	1304.53	1283.66	1267.13	1253.24	1241.54	1231.59	1219.73	1208.89	1198.35	1185.28	1174.83	1168.66	1154.76	1143.72	1130.09	1121.32	1124.73	1119.65	1110.79	1111.06	1106.56	1096.62	1101.8	1130.19	1132.91	1121.05	1103.89	1090.34	1080.88	1077.72	1070.58	1067.37	1061.93	1068.6	1075.06	1076.77	1070.75	1053.25	1037.48	1034.05
1032	0.65		2	1095.16	1087.87	1081.4	1084.09	1078.05	1061.55	1036.27	1011.75	995.136	981.872	971.635	963.705	952.71	942.937	933.781	923.079	916.202	907.221	890.837	876.538	861.602	853.254	855.037	848.114	840.931	840.806	834.818	825.408	822.383	835.708	829.385	811.971	797.187	786.017	779.126	781.493	779.509	783.403	782.095	795.664	811.818	807.453	791.164	768.683	752.642	750.553
355	0.5	0.1	2	931.334	921.413	924.586	930.489	932.405	987.379	1020.33	936.131	916.028	925.498	932.778	936.375	934.98	926.662	923.202	906.413	907.384	1049.48	1064.51	938.478	847.116	821.645	824.397	825.799	814.861	806.2	820.98	826.348	805.87	844.579	938.864	929.967	900.853	971.355	1030.22	1073.52	1116.4	1163.94	1208.42	1228.37	1251.02	1375.12	1544.53	1498.69	1439.55	1443.64
1101	0.05		5	61.8849	106.397	158.388	263.319	126.81	200.756	252.614	277.334	288.086	317.386	361.362	478.715	503.974	569.369	647.727	775.596	825.851	770.527	465.47	177.334	157.027	133.233	130.732	115.421	135.294	172.607	165.182	162.615	155.478	180.281	229.621	274.751	367.637	395.812	425.018	689.761	1228.69	1432.39	1631.43	1706.14	1706.83	1331.32	508.611	127.596	57.5835	4.94281
1023	0.05		4	1198.71	1196.02	1195.14	1220.79	1223.8	1215.98	1202.26	1187.92	1175.68	1163.76	1153.17	1144.26	1133.93	1124.31	1114.73	1103.58	1095.09	1092.66	1087.25	1079.82	1070.14	1063.61	1075.93	1075.73	1068.65	1067.69	1071.04	1068.12	1073.06	1115.43	1135.71	1126.57	1114.5	1104.01	1095.07	1087.48	1079.85	1076.31	1076.13	1115.88	1126.49	1136.49	1149.14	1138.67	1127.38	1119.33
1864	0.4		1	161.038	163.399	266.565	493.209	518.56	470.556	415.654	344.797	269.494	221.753	173.253	149.43	147.771	155.89	149.525	153.064	158.941	192.379	206.62	211.682	220.023	229.271	245.232	255.498	310.245	373.908	415.006	500.261	545.32	490.886	421.874	374.744	390.917	392.355	353.281	529.063	761.361	833.808	897.553	1013.28	1091.4	1085.48	963.871	816.636	699.164	573.645
1021	0.05		4	961.771	962.479	960.11	959.896	958.598	952.63	942.08	929.594	919.579	915.063	912.577	912.656	910.783	908.239	906.306	900.935	896.737	893.605	885.459	877.232	873.476	872.86	879.815	879.586	878.363	881.526	880.058	875.513	878.439	883.269	878.206	868.932	859.364	853.715	851.086	851.704	851.24	852.587	853.406	857.109	853.629	852.815	844.858	831.95	825.439	825.035
1120	0.05		9	858.331	856.201	852.521	847.922	843.941	840.162	830.612	822.066	815.944	812.264	808.819	806.64	803.083	799.474	797.153	793.457	790.326	790.802	784.532	779.857	776.91	776.609	776.839	774.038	770.832	769.527	767.615	764.326	775.639	796.272	801.033	796.202	790.746	786.62	783.084	781.479	779.652	779.352	777.982	775.269	774.966	775.214	769.236	760.697	753.549	765.629
182	0.9	0.1	0.75	966.605	1102.7	1102.7	1102.7	1102.7	1100.74	1084.19	1009.19	926.755	855.792	758.13	717.184	658.074	643.749	652.922	737.223	753.909	678.239	551.702	449.293	378.449	313.384	388.622	848.557	1102.7	1102.7	1102.7	1102.7	1102.7	1102.7	1096.27	1062.48	1022.43	984.506	1049.57	1102.7	1102.7	1102.7	1102.7	1102.7	1102.7	1102.7	1102.63	1099.62	1073.63	1040.35
7311	0.05		4	104.727	104.528	104.851	105.609	104.6	104.698	104.376	104.589	104.637	104.75	104.878	105.011	104.861	104.896	104.917	104.864	105.572	107.336	105.296	104.631	104.503	104.569	104.816	104.772	104.746	104.652	104.766	104.766	105.331	109.539	108.754	104.793	104.677	104.571	104.7	104.732	104.709	105.013	104.776	108.676	107.148	104.74	104.791	104.779	104.902	105.363
1755	0.5		0.85	102.665	123.989	152.078	157.465	119.935	120.88	109.803	99.7485	99.7086	99.8627	99.7571	100.745	102.51	216.374	276.981	303.813	286.21	357.24	311.493	228.692	143.431	98.2841	98.2762	116.217	219.166	327.953	359.147	335.235	298.853	235.256	155.413	99.779	134.172	98.612	98.3522	125.801	141.301	159.331	127.199	130.861	374.542	564.039	524.4	460.213	395.111	336.254
1192	0.05		5	836.489	843.577	845.198	849.14	851.087	846.612	836.395	825.239	815.81	814.7	816.273	819.119	818.785	819.793	819.38	817.06	819.913	826.524	820.48	810.967	807.649	808.576	813.254	813.837	815.309	820.352	819.584	817.721	816.747	811.1	803.877	795.56	786.666	784.935	788.807	804.172	811.201	818.419	822.27	822.211	820.452	818.055	813.318	804.664	795.72	790.885
541	0.15		1	431.634	373.342	314.353	276.742	362.589	586.678	731.123	701.077	651.308	602.544	546.017	488.308	425.132	362.391	302.666	242.238	196.817	191.533	192.873	210.471	216.115	220.179	222.966	225.077	228.848	229.579	232.418	254.396	347.706	530.203	667.001	674.452	678.969	669.993	634.094	587.511	533.363	483.351	438.626	403.182	405.77	595.729	793.573	837.423	814.339	765.953
1716	0.4		2	72.8243	73.5643	74.078	73.2977	72.86	75.1369	80.1753	81.0663	81.8785	83.2184	86.3093	92.3415	93.6149	108.31	116.94	120.384	138.006	129.373	74.9868	73.2368	72.925	71.5017	71.7154	72.4599	77.1266	81.8467	72.9031	73.1339	73.0676	74.1983	74.1271	74.0645	74.0664	74.2543	74.3165	122.845	131.038	117.294	94.7183	87.3592	126.383	105.172	73.766	73.8355	73.5754	79.5451
1883	0.2		0.8	486.506	491.365	497.199	503.843	497.194	489.825	481.177	469.561	458.225	455.838	454.334	454.167	451.795	455.43	457.243	452.856	445.517	440.399	431.008	427.645	421.152	415.462	414.534	415.602	426.269	431.157	430.609	427.678	425.887	421.045	413.339	409.796	402.319	399.227	397.766	400.828	410.353	416.898	423.15	428.952	424.818	418.816	410.929	401.736	398.003	392.979
895	1		0.45	150.422	131.824	111.142	103.207	96.0143	89.1339	81.6859	88.7175	105.773	120.942	138.002	140.676	132.449	123.94	116.654	127.351	140.362	151.231	162.001	166.887	166.681	168.754	164.696	148.834	130.368	113.125	92.3289	86.7566	86.2297	85.7969	82.7047	85.5979	97.2618	117.28	139.555	158.69	166.452	170.624	173.207	177.517	179.395	184.709	184.788	186.325	180.949	179.574
1093	0.1		1	52.1579	51.9962	51.9617	51.7381	53.8943	52.6786	52.0431	50.6313	49.5422	52.2317	52.264	52.8041	52.4043	52.3097	52.8662	52.072	55.6022	67.0956	60.7939	52.5616	52.3786	55.5074	54.4019	52.288	52.8051	67.0044	63.6845	54.2689	61.3203	72.871	59.3679	52.3831	51.6125	50.9111	52.4366	62.7252	55.929	51.758	52.6598	51.8461	61.2323	60.6117	52.9058	52.1723	51.7947	51.4648
1709	0.2		1	308.055	310.533	332.333	362.155	375.006	368.866	360.876	353.353	342.313	325.363	311.802	310.999	299.554	301.403	325.985	345.494	368.157	413.3	414.755	406.051	397.759	383.253	379.097	378.543	394.443	426.347	464.546	494.129	486.553	496.095	489.277	471.235	448.979	427.704	412.008	415.823	406.101	398.539	402.613	419.037	435.604	434.582	423.179	413.103	389.559	368.406
1017	0.1		1	97.3926	99.4718	112.83	135.957	142.92	142.269	133.825	125.08	117.479	110.155	103.772	98.8318	92.4604	87.4753	84.4716	82.2222	98.2402	128.366	143.697	160.453	156.394	151.204	161.933	166.06	171.684	236.442	273.66	293.057	311.364	309.014	292.136	276.184	301.396	297.71	280.674	397.039	469.295	464.771	449.957	463.268	509.357	494.038	454.885	409.901	364.229	321.769
[truncated: 434 more columns]
