# Supplementary material for: The value of observed reservoir storage anomalies for improving the simulation of reservoir dynamics in large-scale hydrological models
Source: Copernicus journal article supplement (doi:10.5194/hess-29-4073-2025), 2025-09-03
Supplement: Supplementary file 4 [file CH_results_calibrated_against_storage.xlsx]

## Sheet: Readme
	Sheet name	Note	Inflow source	Total number of reservoirs	Number of reservoirs where downstream demand is taken into account
	Outflow(WG inflow-No Demand)	Simulated outflow (×106 m3/month) where downstream demand is not considered for irrigation and supply reservoirs.	WaterGAP	100	0
	Storage(WG inflow-No Demand)	Simulated storage (×106 m3) where downstream demand is not considered for irrigation and supply reservoirs.	WaterGAP	100	0
	Outflow(WG inflow-With Demand)	Simulated outflow (×106 m3/month) where downstream demand is considered for irrigation and supply reservoirs.	WaterGAP	21	21
	Storage(WG inflow-With Demand)	Simulated storage (×106 m3) where downstream demand is considered for irrigation and supply reservoirs.	WaterGAP	21	21
	Outflow(OBS inflow-With Demand)	Simulated outflow (×106 m3/month) where downstream demand is considered for irrigation reservoirs.	Observed	35	2
	Storage(OBS inflow-With Demand)	Simulated storage (×106 m3) where downstream demand is considered for irrigation reservoirs.	Observed	35	2

## Sheet: Outflow(WG inflow-No Demand)
grand_id	a1	a3	1980-01	1980-02	1980-03	1980-04	1980-05	1980-06	1980-07	1980-08	1980-09	1980-10	1980-11	1980-12	1981-01	1981-02	1981-03	1981-04	1981-05	1981-06	1981-07	1981-08	1981-09	1981-10	1981-11	1981-12	1982-01	1982-02	1982-03	1982-04	1982-05	1982-06	1982-07	1982-08	1982-09	1982-10	1982-11	1982-12	1983-01	1983-02	1983-03	1983-04	1983-05	1983-06	1983-07	1983-08	1983-09	1983-10	1983-11
610	1	4	2060.87	4583.12	3663.81	2124	3935.16	4905.99	2090.51	1574.18	1518.11	1564.64	1506.92	1549.93	1543.56	1390.12	1750.74	1614.66	1541.77	1476.87	1362.25	1176.55	1134.71	1171.06	1131.47	1168.59	1208.45	1450.99	1616.92	1352.09	1201.29	1142.27	1150.69	1088.65	1059.51	1098.05	1068.46	1400.67	1388.12	1499.36	2043.77	1799.06	1280.27	1115.37	1275.61	1472.01	1387.83	1453.46	1392.85
753	0.8	2	1680.82	1522.66	1722.73	1861.12	2018.08	1779.81	1598.1	1446.1	1428.93	1524.05	1467.78	1566.29	1579.53	1415.06	1628.93	1617.08	1858.34	1994.73	1564.19	1412.28	1362.21	1460.49	1418.53	1458.28	1508.71	1339.11	1660.15	2260.71	2221.61	2036.59	1908.75	1666.4	1590.99	1725.99	1729.48	1798.67	1913.41	1657.83	1905.84	1901.64	2137.01	3181.32	1856.7	1693.12	1634.77	1760.64	1761.98
870	0.8	0.05	2085.15	1883.36	2085.15	2017.89	2085.15	2017.89	2085.15	2085.15	2017.89	2085.15	2017.89	2085.15	2085.15	1883.36	2085.15	2017.89	2085.15	2017.89	2085.15	1961.47	1898.19	1961.47	1898.19	1961.47	1961.47	1771.65	1961.47	1898.19	1961.47	1898.19	1961.47	2203.99	2132.89	2203.99	2132.89	2203.99	2203.99	1990.7	2203.99	2132.89	2381.6	2256.58	2203.99	2371.13	2294.64	2371.13	2294.64
597	1	3	1329.47	2124.81	2397.61	2845.19	6398.19	3648.5	1097.58	776.897	852.253	1053.49	1071.56	1071.6	1001.12	790.908	838.55	1197.25	1652.2	1197.19	595.181	456.233	439.151	573.091	758.082	775.462	766.702	729.537	1402.79	1515.77	2323.98	1820.38	820.232	594.575	694.259	905.329	952.967	1076.57	1012.02	1142.07	2140.08	1965.85	2974.63	2982.9	1385.9	902.6	880.49	1030.96	1040.99
307	1	5	321.926	304.34	368.612	450.892	395.934	465.284	321.98	283.777	300.224	333.171	333.002	344.229	347.374	324.584	392.671	479.254	900.108	584.443	396.108	343.216	345.752	375.705	388.642	396.791	394.566	384.745	595.622	862.717	692.131	1045.64	601.622	468.183	448.872	493.381	484.073	507.411	526.321	457.549	527.902	538.41	533.238	473.61	427.29	385.02	389.771	446.126	442.839
1753	0.05	4	9237.55	8912.91	19565.1	11226	5734.37	3577.4	2577.78	2124.26	1768.64	1993.39	1750.94	2380.02	2385.97	7329.6	5908.57	5387.76	2877.78	2709.68	1769.79	1274.75	1056.12	890.439	806.258	2013.46	12691.6	12042.8	9234.14	5760.21	3703.83	2530.98	2215.84	1990.33	1917.85	1625.52	1527.87	12669.8	8807.62	9953.96	7564.39	11757.9	11686.4	4670.92	2802.24	2167.14	1747.8	1561.81	2205.59
297	0.55	0.8	1425.3	1286.92	764.794	902.029	1466.42	1405.4	1433.02	490.107	472.12	483.998	469.905	483.648	484.91	438.801	482.836	475.156	513.475	1095.79	1998.05	1439.5	1392.49	1439.66	1389.44	1435.62	1432.88	1046.19	351.835	600.863	1417.77	1418.25	1444.81	322.056	316.286	323.162	307.096	317.596	317.149	286.468	319.44	317.338	333.191	326.567	334.678	1398.42	1351.05	1394.82	1354.55
1036	0.45	2	432.418	501	523.521	464.792	415.49	261.333	249.054	242.482	230.141	234.955	238.574	266.602	253.845	276.481	278.657	250.65	295.681	265.379	230.46	221.151	206.193	238.151	280.447	288.666	464.663	576.448	274.36	233.66	225.732	418.897	428.321	434.696	411.024	411.811	505.309	1254.58	504.666	439.661	480.27	625.731	641.364	465.874	462.425	450.179	427.514	456.455	777.676
989	0.35	1	462.58	756.862	985.026	952.776	576.36	470.251	351.059	321.4	290.287	284.578	284.479	366.897	297.187	348.443	386.373	289.791	623.975	1553.15	852.428	638.201	490.736	489.49	874.774	718.591	717.472	1218.28	763.732	599.199	764.902	1080.82	875.509	800.183	734.997	651.824	633.72	1283.19	822.316	889.802	887.545	2288.59	1460.08	849.58	712.665	619.645	555.576	842.361	1216.41
1135	0.45	3	147.913	201.516	175.94	149.606	312.079	260.425	131.176	102.628	286.794	326.65	247.857	460.167	182.873	167.557	445.774	231.171	311.78	344.385	213.774	178.072	148.703	1696.79	561.623	421.873	352.158	567.914	454.847	318.414	1502.68	1234.11	755.246	481.072	359.329	307.339	255.99	302.644	347.624	765.543	612.592	539.992	558.846	412.94	293.172	219.531	176.047	1407.41	667.449
1269	0.2	6	834.883	839.224	595.522	1141.03	873.786	439.527	306.74	239.133	193.33	184.043	173.659	179.152	175.294	193.097	232.921	202.979	218.434	491.926	258.503	190.218	171.909	162.531	182.601	185.651	212.494	353.665	282.534	568.043	450.948	265.783	228.02	189.738	157.532	157.101	243.033	1636.94	842.768	1386.91	928.267	630.709	699.357	494.91	362.251	267.953	212.898	191.157	173.96
1077	0.6	3	207.932	352.677	263.749	286.892	828.682	394.547	247.924	189.942	150.751	138.295	120.633	165.485	113.413	124.061	233.84	157.545	162.916	242.865	144.797	149.875	119.644	453.285	670.133	409.124	370.002	1151.48	470.988	325.178	1384.9	1153.62	520.287	378.931	283.165	230.601	190.337	403.609	336.317	906.135	611.332	686.326	820.455	551.055	360.528	262.377	196.392	1113.86	403.707
1026	0.55	3	218.901	443.604	410.005	280.43	192.684	209.359	133.894	117.562	103.611	103.92	145.511	255.93	166.641	270.899	243.233	163.136	331.433	383.093	181.889	236.652	135.758	246.406	367.247	270.69	628.294	812.322	234.716	156.713	129.006	181.347	130.154	191.013	128.82	107.152	286.865	1625.25	295.483	281.83	224.584	587.869	603.75	200.457	174.72	150.12	130.732	282.108	538.995
740	0.05	0.05	31.1193	28.1077	31.1193	30.1154	29.6938	28.7359	29.6938	29.6938	28.7359	29.6938	28.7359	29.6938	29.6938	26.8202	29.6938	28.7359	27.9708	27.0685	27.9708	27.9708	27.0685	27.9708	27.0685	27.9708	27.9708	25.2639	27.9708	27.0685	34.1054	33.0053	34.1054	34.1054	33.0053	34.1054	33.0053	34.1054	34.1054	30.8049	34.1054	33.0053	34.6118	33.4953	34.6118	34.6118	33.4953	34.6118	33.4953
1294	0.35	6	53.1319	49.9725	51.7699	54.3204	91.2432	55.0917	47.8256	27.8274	63.7047	77.4629	99.993	113.53	105.962	100.606	265.008	198.157	185.041	513.512	203.905	183.67	164.208	197.24	191.003	169.34	163.343	152.843	154.949	98.0241	115.829	90.031	87.1971	81.8583	74.3825	74.1564	71.1892	87.1714	106.565	179.976	216.161	113.603	116.47	98.3725	85.2356	76.2988	66.8206	65.3865	61.388
1848	0.2	0.05	254.044	152.824	271.907	297.708	171.803	166.261	171.803	57.0831	16.6261	17.1803	86.4559	171.803	146.864	155.177	171.803	166.261	48.2468	74.995	43.7471	23.4984	14.249	18.9987	14.249	50.4966	77.4948	69.9953	77.4948	74.995	251.01	242.913	251.01	207.286	24.2913	25.101	53.4408	251.01	251.01	226.719	251.01	242.913	303.529	293.738	303.529	303.529	293.738	153.723	99.871
1869	0.1	2	547.978	430.147	1294.21	738.645	266.309	226.029	175.578	36.7558	39.7884	35.3217	41.7444	57.3309	71.1514	190.138	275.885	123.869	47.5877	34.5023	24.7894	17.2864	14.3222	13.5556	12.7963	13.4146	183.87	230.634	124.517	528.585	324.738	263.192	253.665	31.7632	30.3967	30.8855	37.6082	1654.26	679.545	730.13	566.178	786.644	800.385	334.186	320.898	290.652	123.866	43.2984	61.4961
1863	0.75	3	212.537	143.42	353.394	129.711	131.281	113.297	109.576	105.453	101.315	108.823	109.822	109.725	106.661	177.865	118.225	111.851	86.9169	83.3037	82.3319	80.8128	77.0739	78.7881	75.5759	107.345	210.412	203.199	119.647	127.761	93.0735	85.048	84.3657	82.1141	77.2277	81.0319	102.975	176.758	130.715	165.58	170.447	134.895	105.715	92.8208	90.6773	87.2414	83.0342	83.767	132.235
1770	0.4	3	192.005	164.763	247.464	125.691	96.9595	81.4082	78.803	74.5539	69.2781	69.2534	66.3064	73.0429	83.5846	177.355	106.623	116.491	69.9648	89.0085	63.285	59.1625	54.523	54.3868	55.9571	126.626	213.991	184.071	176.512	82.3866	86.7399	77.8028	75.7073	72.8638	68.8898	68.5468	79.9222	216.521	132.562	147.627	106.765	124.181	142.376	88.5007	77.9971	73.0754	67.1049	66.9957	66.5691
965	0.15	5	118.708	101.283	283.972	306.91	137.892	85.2677	41.8478	36.6016	33.9955	36.2272	36.9256	41.6381	36.8752	37.3856	55.2189	33.6602	81.0304	17.2033	5.77787	31.9108	22.4459	14.8365	20.2854	59.619	36.0568	146.623	245.152	89.6604	355.376	177.514	137.932	90.5699	76.9989	70.3933	60.8594	63.0719	90.0649	130.165	332.022	384.984	181.099	206.176	105.989	65.1723	54.759	57.8892	70.7843
1247	0.25	4	66.8518	78.0983	67.6204	62.5849	98.2449	64.7338	45.194	38.7747	193.819	260.441	173.89	283.279	106.054	86.5417	184.694	111.987	98.278	90.1939	95.7342	92.7084	85.8523	831.502	166.798	159.032	144.144	166.458	162.453	122.382	421.565	315.74	199.754	147.914	123.948	114.745	102.444	110.484	121.307	150.459	148.824	136.897	113.359	122.051	89.5925	79.6247	71.4796	71.3526	69.8794
7313	0.25	3	263.231	290.705	499.581	765.986	863.025	1170.7	270.571	86.4749	218.93	291.996	303.696	317.493	299.287	351.583	523.723	586.112	1359.01	926.009	228.801	40.5171	32.5515	206.678	260.457	355.236	319.28	535.74	1095.17	1646.6	1539.34	1112.9	382.899	151.649	192.549	383.6	342.607	425.491	506.868	441.149	1090.15	899.066	791.751	592.505	326.55	136.619	154.817	334.814	402.153
1287	0.5	3	690.615	705.47	514.656	473.366	530.462	395.189	313.097	250.013	205.365	446.893	251.381	344.177	234.338	220.521	333.543	297.491	354.353	1592.42	545.34	389.089	332.309	1277.39	931.094	624.816	416.417	654.435	511.626	496.876	1245.99	869.669	566.846	450.174	360.846	336.435	357.405	1142.3	624.058	1144.81	1170.85	673.785	804.884	524.8	419.5	344.421	283.871	267.619	234.231
1186	0.15	7	248.897	177.771	103.981	155.154	119.772	63.2891	50.181	38.921	31.5847	33.2951	32.5424	34.7439	33.3721	30.4203	38.3216	37.266	58.1361	150.488	56.2873	42.8037	36.5264	36.7118	45.3224	43.7423	44.5753	97.638	60.1844	48.5241	45.8432	37.0765	29.8393	23.6141	18.8149	19.0003	20.763	341.145	57.3073	247.794	160.716	59.9832	55.5292	47.8707	37.3138	27.6221	21.8916	20.9964	20.5387
1042	0.5	7	41.8529	68.9287	67.372	45.8896	30.4796	25.4823	23.2868	21.0831	18.8716	18.3583	17.9834	18.8569	20.8236	31.7684	32.5423	26.9923	33.1696	34.5122	21.8851	19.2704	17.0222	20.6111	24.1287	21.766	115.976	143.326	36.5806	25.9918	23.9625	30.6023	20.668	18.5223	16.3095	15.7943	50.6224	340.617	39.0583	36.4017	38.0057	97.797	67.1414	33.5308	28.5472	24.298	20.7864	36.5571	195.858
884	0.05	0.75	2820.37	2530.49	2733.8	2725.06	2820.31	2723.33	2732.43	2153.47	2139.38	2146.62	2075.35	2211.12	2147.24	1933.09	2212.13	2077.07	2147.94	2140.27	2147.09	1925.78	1858.91	1980.16	1858.64	1922.52	1922.5	1791.58	1956.39	1880.82	2013.54	1888.69	1939.3	2313.13	2172.93	2314.9	2172.1	2245.76	2312.21	2020.27	2254.54	2254.74	2265.32	2245.62	2250.21	2394.89	2386.73	2393.63	2385.15
1273	0.2	9	33.1696	38.5508	34.4227	30.1681	63.5465	29.9952	15.0346	12.3525	13.4035	16.7806	19.6677	68.7492	32.7979	32.5005	70.9727	41.187	34.548	65.349	30.5493	22.1413	17.0256	89.2545	37.3263	39.1581	40.254	58.6292	69.8685	52.4604	170.44	66.2691	57.0901	41.1491	31.3679	27.2854	23.3116	26.3499	37.887	49.3285	64.455	46.8222	38.4267	30.2683	22.3576	16.931	13.8687	13.7985	13.0563
961	0.05	8	0	0	0	0	0	0	0	0	0	0	0	0	0	0	0	0	0	0	0	0	0	0	0	0	0	0	0	0	0	0	0	0	0	0	0	0	1.95619	2.0838	3.08354	32.6525	41.9191	65.4404	60.2627	32.3326	14.9533	18.8299	108.075
1144	0.1	1	1294.58	1561.72	1144.91	1067.84	1227.09	882.48	583.371	417.418	388.881	1389.61	882.905	1328.68	839.315	835.885	1036.96	810.71	902.365	1937.32	997.316	768.27	612.047	2042.65	1873.87	1297.93	1019.18	2377.39	1505.28	978.719	2375.55	2982.3	1621.98	1095.07	894.217	846.455	871.551	4167.25	1616.62	1984.15	1841.72	1365.56	1776.28	1204.85	1105.6	859.332	707.14	691.819	676.021
616	0.85	4	1750.49	4013.38	3881.45	2162.51	3413.14	4822.62	2085.71	1737.26	1682.57	1740.99	1686.45	1693.16	1744.5	1576	1745.26	1636.53	1690.62	1631.16	1685.56	1593.27	1579.04	1633.18	1582.29	1636.24	1637.18	1479.04	1589.95	1583.35	1586	1482.93	1581.17	1380.38	1260.09	1344.26	1302.33	1346.84	1346.99	1216.84	1308.33	1303.25	1266.42	1259.27	1262.21	1333.89	1289.23	1295.58	1293.14
911	0.15	0.6	571.287	471.394	643.48	637.907	405.285	410.254	205.045	170.606	167.925	146.841	130.77	137.639	125.328	147.368	139.296	139.067	113.919	101.857	362.787	243.347	99.9488	98.156	122.07	185.809	124.153	638.992	1190.38	948.373	1218.11	843.066	651.447	511.38	457.097	474.839	604.058	1010.91	672.43	1199.88	1715.15	1974.76	1197.38	907.183	1534.4	1243.39	742.059	474.643	1048.08
1006	0.4	5	32.3404	71.2635	67.7527	45.357	34.0243	25.8422	23.3715	21.0725	18.794	19.7994	19.17	26.1197	22.0841	39.4691	31.4718	25.1002	53.0428	93.4922	34.405	28.4113	22.778	57.8201	60.4339	46.5829	94.9385	75.1375	38.1948	29.5655	28.3012	48.5629	26.4962	64.4317	26.6938	23.4151	41.6264	147.802	35.54	37.3723	35.1631	138.199	80.3124	37.4664	32.9613	28.641	24.979	119.126	122.187
1048	0.15	2	410.411	814.506	926.115	1632.14	1428.53	1153.84	616.643	499.57	414.116	394.49	358.083	358.383	340.487	303.442	344.179	308.579	264.54	290.941	199.69	183.419	164.337	170.406	451.846	382.331	330.537	910.78	544.339	400.014	1119.51	1354.29	669.798	514.188	407.82	356.964	305.427	349.883	309.958	522.186	788.912	1147.7	921.951	923.119	663.524	543.436	460.862	685.266	542.422
1123	0.95	5	58.1863	70.2757	42.5205	39.2646	46.8917	29.7831	26.5281	23.575	70.5638	49.1295	31.303	59.6752	35.2364	52.3113	46.5007	32.6398	54.839	83.2363	37.494	29.4313	24.7577	24.9503	34.3045	25.6396	90.2761	77.9627	51.4639	39.4153	138.935	63.5117	38.9101	32.4166	26.9398	24.5499	24.7016	190.322	36.1388	57.526	75.9658	42.0968	137.302	37.7571	36.8407	28.677	24.4656	22.9253	22.8246
1032	0.4	2	156.218	273.813	382.785	309.129	215.161	147.694	114.115	95.8617	80.0645	73.3039	62.7276	62.3816	55.2181	56.6432	82.8368	70.6436	118.804	153.945	90.5539	75.7303	59.8935	64.7581	253.67	158.23	201.553	279.828	187.74	126.944	484.55	538.462	219.381	173.991	133.959	114.724	96.1598	230.301	208.535	378.455	335.785	608.29	453.568	265.394	202.671	158.039	128.289	277.539	202.389
1774	0.4	0.85	650.46	555.744	833.476	509.119	414.19	196.354	183.69	163.07	145.299	140.806	130.419	130.519	131.934	263.806	286.115	320.044	224.379	286.953	182.632	161.551	144.44	138.598	128.56	153.913	441.325	746.275	615.296	280.46	222.653	279.118	259.379	251.828	280.885	245.082	309.673	515.771	454.198	596.202	495.609	553.787	489.286	292.819	254.367	232.474	208.357	206.02	192.818
1781	0.25	0.85	887.688	682.943	1630.32	904.832	459.891	268.498	217.935	167.968	139.228	131.495	80.5546	101.102	139.13	825.933	614.045	606.927	247.448	289.048	153.611	116.93	97.6645	60.2657	35.8465	87.7633	867.514	1375.96	1066.81	473.672	374.263	297.792	230.265	254.466	179.308	168.454	236.665	912.969	676.813	1360.13	1340.88	1303.61	606.604	351.421	263.047	210.042	176.76	166.695	220.995
355	0.4	4	157.561	132.81	191.094	591.519	715.141	214.894	32.8769	19.1539	14.1118	38.0105	190.169	204.203	156.776	168.895	244.027	503.424	1101.27	245.789	42.5133	13.4993	11.4888	13.5343	55.5142	163.003	137.503	149.974	208.07	386.297	590.758	338.002	34.064	11.6648	9.67125	36.4027	215.832	246.536	277.6	299.355	356.108	829.112	1461.93	535.454	81.2713	27.7221	121.793	191.815	220.682
1101	0.4	3	202.124	125.973	548.161	222.261	100.571	62.8814	45.5244	36.0162	29.8539	31.3785	112.098	107.74	88.4787	157.303	150.011	109.001	71.4185	78.2732	55.5624	38.427	31.662	29.5509	28.6516	34.7537	124.718	220.775	118.16	197.567	90.4398	52.5811	38.0862	31.8753	27.0043	27.7147	39.3815	810.779	242.347	196.446	120.769	314.793	382.294	87.91	57.2871	40.4137	32.1405	31.4466	77.7694
1023	0.05	2	301.093	513.015	720.135	1074.69	1007.22	815.109	336.247	263.907	222.124	210.984	183.214	181.163	178.935	156.552	170.647	160.304	187.119	180.798	141.027	109.209	58.7506	27.1646	124.202	92.0463	85.1187	179.582	140.852	106.305	126.013	187.779	124.05	96.9308	62.8015	38.8165	22.4788	23.9318	38.8367	88.4456	213.752	909.463	420.744	335.51	291.685	243.831	193.87	191.539	181.499
1060	0.55	5	39.9936	71.9871	107.056	42.4026	32.9292	26.8983	22.378	18.8104	16.0176	15.1794	16.654	69.6594	23.82	60.2204	66.0605	36.0788	76.2859	67.8363	31.2826	42.6072	24.5185	50.1994	97.5277	62.2211	149.753	119.714	41.7157	28.1335	25.4689	67.904	27.2847	22.5039	18.2127	16.3574	95.7674	317.534	78.0243	70.186	41.3368	87.7727	140.609	39.3857	30.2114	25.0713	20.6842	21.7147	98.683
1864	0.1	2	266.502	176.324	714.521	284.379	136.593	91.4573	75.2723	15.7267	16.672	29.9002	69.4444	105.308	75.6697	128.037	131.881	89.3368	42.4493	33.2701	21.8628	13.3228	9.91996	8.49177	7.80861	12.4522	146.066	161.378	104.719	267.179	138.614	98.4464	84.4246	92.5758	60.5403	95.6018	131.075	993.538	280.26	343.489	251.22	482.429	440.425	147.293	115.385	94.5396	83.3726	28.1536	127.07
1797	0.65	0.8	3572.88	2848.56	5402.83	2821.86	1808.16	1280.69	1149.61	1024.31	925.239	911.36	887.911	1000.34	1107.21	2918.88	2078.7	2342.06	1071.88	1214.87	618.806	507.354	435.571	404.733	378.881	795.542	3228.25	4054.18	3366.44	1406.89	1298.58	1199.36	1101.75	1098.16	1002.81	973.128	1240.94	3490.03	2307.52	3598.65	2966.55	3459.21	2365.48	1398.34	1082.46	945.922	832.146	806.391	870.774
305	0.85	0.1	1866.96	1294.84	1804.72	2022.33	2943.84	2930.37	2207.05	1631.7	1745.49	1680.58	1764.85	2193.13	2000.75	1884.57	1958.96	2163.85	2529.19	2684.74	1594.54	1282.45	1245.6	1558.57	1555.47	1845.96	1496.54	2192.78	2993.07	2944.68	2919.46	2697.64	2250.67	1596.99	1622.85	2034.72	1742.77	1986.49	2220.78	1897.19	2144.06	1868.43	1941.05	1753.6	1246.65	878.789	1343.79	1356.39	1927.18
968	0.05	7	44.0208	49.9913	153.878	476.772	223.618	116.338	70.4466	67.7624	66.8267	71.073	67.8488	65.1858	62.0127	55.0474	62.2065	59.1899	141.002	65.9765	52.1662	61.0933	54.9969	58.8261	58.232	58.7416	56.6934	61.2395	83.3956	65.2666	125.685	105.737	72.6731	52.1728	42.3482	39.2129	36.1937	34.3266	36.4442	42.6728	105.779	140.091	91.653	160.204	78.2444	58.6774	60.6776	68.5943	72.8954
1019	0.1	0.05	6.32273	27.7384	55.8848	48.3383	9.994	2.74795	3.02079	3.02079	2.92335	3.02079	2.92335	3.02079	3.02079	2.72846	3.02079	2.92335	3.02079	48.0316	49.6327	49.6327	12.0079	4.96327	6.24411	4.96327	19.3728	44.8295	49.6327	48.0316	49.6327	38.3738	20.0823	5.11651	4.9886	5.11651	4.9886	39.6529	39.6529	35.8156	39.6529	38.3738	39.6529	96.5843	99.8038	99.8038	56.0189	9.98038	27.0436
1302	0.05	7	30.1199	26.5995	20.347	11.6826	15.8954	6.65728	0.721481	4.69937	17.6091	24.5206	28.9029	25.9482	27.2297	23.3602	57.8163	33.7592	26.3554	215.834	48.9771	41.9885	39.0307	42.5494	40.6916	38.8213	36.5557	34.709	32.1219	12.6743	20.127	7.10559	4.81614	5.57409	5.72331	6.24984	6.8343	10.1249	15.8628	30.9002	44.3377	12.3764	8.9766	7.53011	28.171	28.1129	26.7724	28.1013	27.3191
1824	0.2	1	8266.2	6975.9	17640.2	7962.06	4850	2825.25	2207.82	1843.74	1581.96	1837.81	1793.12	1898.53	2166.89	6775.93	4633.05	4744.57	2271.85	2129.11	1345.8	1086.81	849.781	736.209	662.837	1910.84	11455.2	9838.26	7437.8	4572.25	2894.49	2200.44	1929.84	1807.57	1577.7	1451.17	1507.01	11140.2	6196.71	8401.32	6693.99	9904.27	8157.34	3410.01	2294.37	1824.62	1493.67	1348.52	2123.53
1316	1	0.05	0	0	0	0	0	0	0	0	0	0	0	0	0.111258	0.100491	0.111258	0.107669	0.854172	1.07669	1.11258	1.11258	1.07669	1.11258	1.07669	1.11258	2.36451	2.13569	2.36451	2.28823	2.36451	2.28823	2.36451	2.36451	2.28823	2.36451	2.28823	2.36451	1.47981	1.33661	1.47981	1.43208	1.47981	1.43208	1.47981	1.00723	0.143208	0.147981	0.143208
1835	0.9	0.5	7198.89	6057.18	14653.1	6423.8	4029.4	2426.08	1946.39	1649.73	1473.1	1539.66	1398.97	1584.49	1815.26	5929.76	3982.62	4177.7	1928.21	1921.88	1131.56	916.772	734.742	645.674	596.82	1825.56	9085.88	8853.55	6459.11	3539.74	2440.66	1931.73	1713.35	1632.95	1441.58	1336.13	1469.13	8581.19	4980.64	7008.13	5499.91	7468.43	6099.52	2850.03	1944.61	1572.16	1306.77	1194.64	1991.77
1847	0.3	2	5974.62	5011.32	11538.5	5298.76	3063.94	2010.31	1628.09	1387.79	1208.83	1162.08	1162.34	1366.12	1479.77	4941.26	3331.69	3616.73	1658.66	1738.08	965.513	754.06	616.006	549.458	500.033	1354.58	6778.9	7667.98	5615.81	2624.78	1990.87	1617.65	1437.54	1385.79	1230.77	1157.26	1349.64	6661.27	3920.42	5789.78	4471.4	5829.28	4260.56	2363.62	1625.35	1338.38	1124.92	1041.15	1348.36
1231	0.4	5	135.915	93.6737	66.8018	58.1962	53.9668	39.2978	30.072	23.7852	19.3228	19.5905	18.8015	20.0929	19.6163	17.7752	20.963	21.3542	44.9542	263.145	61.3958	39.5012	31.522	42.9252	82.4231	60.2211	52.4346	62.6328	57.1142	45.9977	50.7194	42.3126	36.1044	27.2489	20.9698	20.1101	24.991	269.354	72.8877	152.961	90.058	68.2059	56.482	50.7087	41.1826	31.908	25.5226	23.0842	21.4611
1140	0.05	0.05	0.423396	0.382422	0.423396	0.409738	0.423396	0.409738	8.42932	0.894893	1.90526	1.1547	1.12583	2.97336	0.894893	0.808291	0.894893	0.866026	0.894893	1.38564	0.116093	0.423396	0.409738	0.423396	0.409738	0.423396	0.423396	0.222624	0.202138	0.0655581	0.423396	0.409738	9.56881	8.7354	0.926014	0.956881	0.926014	0.956881	2.62371	8.64279	9.56881	5.09307	0.956881	0.926014	0.0915082	0.423396	0.237648	0.361936	0.409738
1296	0.25	10	39.056	25.3579	22.2407	19.0675	22.4041	15.8536	14.0115	12.9853	11.946	11.6772	10.7784	11.2863	11.7361	14.3158	14.935	12.7078	11.2815	52.0794	15.4214	12.9502	11.4043	23.9913	33.2188	15.8492	15.5495	14.3164	15.5698	15.6559	38.4671	14.9698	12.8119	11.3348	10.3942	10.1715	10.6953	38.9411	29.4699	52.3238	53.5817	24.5181	54.2499	17.3919	14.751	12.7708	11.0518	10.7763	9.77844
1659	0.05	5	13.9726	41.902	78.6059	47.9019	22.5911	17.5355	12.9336	12.687	8.97381	7.01049	5.50004	6.97173	11.1149	52.2399	19.5785	41.9893	64.632	33.1457	22.1554	32.8742	52.255	20.324	15.68	20.4302	56.2047	99.3992	142.209	59.1314	46.7607	49.1172	45.0277	14.3538	8.73284	10.9747	25.8193	96.3201	34.3627	34.1798	73.2116	62.4845	67.6248	46.2669	23.857	17.2262	11.8466	35.6983	81.8674
1277	0.05	10	1.10526	1.05101	1.11612	1.08258	1.55509	1.08839	27.8518	13.2914	2.69467	2.78259	2.69792	10.2712	6.92217	9.12939	17.7967	14.1665	7.69115	24.8346	24.6976	6.04443	4.5281	3.88853	2.37867	2.45626	2.45657	2.95152	3.89223	4.56196	11.2189	4.52892	0.925287	1.10209	1.05277	1.07724	1.03885	1.13212	1.23797	1.25062	1.56655	1.21124	1.22784	1.12957	30.0674	27.4289	2.90585	3.0016	2.90388
1021	0.05	6	119.751	209.108	215.382	167.495	105.216	74.2439	56.8849	39.2408	22.5628	16.6821	12.0871	12.1128	7.23216	5.08454	8.03794	2.91934	11.4747	11.5621	6.34856	3.65215	5.85404	13.4546	126.834	65.1083	56.4086	205.243	89.0647	59.0064	188.401	138.733	91.5663	61.2236	44.4825	30.2053	21.6855	17.1576	13.1185	60.7689	374.053	258.418	127.915	117.807	72.6974	53.1561	39.7471	37.2344	38.8259
1280	0.6	7	22.0752	21.8645	21.9577	18.0109	34.3658	10.3248	1.72104	1.71073	454.794	238.546	96.0961	163.442	141.987	100.735	166.02	98.9883	81.9258	62.971	47.8755	34.4206	36.9602	142.367	58.9132	54.5906	49.7741	52.3086	45.7296	39.1815	53.0312	47.9767	38.6567	27.2256	27.8141	28.23	29.5354	30.4792	35.3722	47.2416	53.2681	35.8262	29.1482	29.6249	16.7846	14.4124	12.3645	18.8246	19.4211
1120	0.95	10	8.08411	7.39029	8.45378	8.1916	8.44742	8.17282	7.60461	7.13788	6.5616	6.61466	6.29101	6.45807	6.35031	5.64299	6.18809	5.89909	6.03963	5.8168	5.46086	5.41268	5.21206	5.40195	5.30115	5.56562	5.6418	5.32484	6.35049	6.58639	22.4658	17.9084	14.2344	11.5402	9.69778	8.92341	8.27111	8.20535	7.79711	7.20627	9.17477	8.8789	8.81756	8.21855	7.89873	7.23754	6.54575	34.6869	13.2058
182	1	0.95	254.937	505.147	222	126.994	105.959	94.6654	95.7021	93.4993	88.9977	91.1093	87.6499	90.7317	92.3408	114.035	133.16	108.534	58.8943	52.5519	51.9369	49.8096	46.9188	48.0959	96.9094	166.217	107.598	383.548	408.012	488.086	160.42	113.877	102.675	96.7851	92.5578	95.3998	174.936	400.592	393.47	510.48	695.356	290.288	152.406	115.058	102.61	98.8191	94.4019	96.424	273.143
7311	0.05	7	12.5061	31.987	52.7535	23.0551	14.8725	12.4263	23.1917	18.266	7.03929	6.66631	4.7755	5.19231	3.57278	3.33464	3.98227	3.47068	5.57997	16.6528	14.4835	11.7151	8.78667	8.16615	27.0139	16.6984	24.3375	36.3888	26.8694	15.7946	71.2499	63.4019	31.2539	19.1333	14.5345	13.5137	11.1557	12.2016	17.794	56.8001	44.8898	88.2311	42.2809	26.7059	14.4241	12.686	10.3979	9.19063	9.5674
1755	0.25	2	74.99	90.8587	140.923	59.7931	44.7185	34.4378	31.5395	27.6694	24.2726	23.2321	23.1626	20.892	25.4243	123.917	57.2607	60.0594	41.4661	125.848	32.574	27.6829	23.9396	22.7843	31.1475	84.4008	163.149	119.882	60.1302	62.6615	62.6993	48.937	44.9015	44.399	87.3255	40.6616	40.4339	128.802	87.0028	96.1609	59.5325	135.03	248.268	68.297	46.8394	40.2315	34.4827	34.4891	124.737
1152	0.2	5	0	0	0	0	0	0	0	0	0	0	0	0	0	0	0	0	0	0	0	0	0	0	0	0	0	0	0	0	0	0	0	0	0	0	0	0	0	0	0	0	0	0	0	0	0	0	0
1192	0.05	3	254.112	319.949	246.271	261.895	268.082	195.937	151.571	124.751	107.562	113.616	114.133	118.146	114.913	116.172	130.545	124.076	120.334	230.423	156.98	111.243	95.5675	94.2328	108.89	114.483	123.693	179.795	166.896	129.135	122.229	94.7267	81.1572	70.1137	62.6446	68.2186	73.8142	398.98	220.286	354.672	243.621	185.096	163.306	141.163	122.627	103.977	90.9575	87.7571	82.0294
541	0.05	2	31.7883	27.5858	24.9633	48.3665	1274.67	454.049	117.449	66.4982	48.8772	45.1747	39.7231	34.5213	25.9916	20.4137	19.8019	272.574	379.54	68.7389	35.9436	21.5356	17.5694	19.8952	18.4303	16.6222	16.6885	13.2102	13.4265	91.9509	928.441	235.363	116.236	105.863	52.3728	40.7962	32.9087	28.798	22.6703	18.8429	17.036	32.8204	917.079	374.874	79.3279	58.0222	39.0978	38.4349	34.8043
1822	0.35	0.5	5010.24	4048.88	8796.05	4291.77	2522.31	1709.96	1430.74	1240.71	1089.88	1056.93	1025.95	1232.18	1336	4250.32	2763.5	3102.88	1420.48	1549.93	829.009	657.958	548.305	497.105	459.729	1160.3	5315.41	6296.64	4809.79	2056.8	1687.2	1438.33	1294.64	1271.45	1147.96	1092.14	1384.41	5613.72	3275.22	4805.35	3843.02	4861.27	3283.2	1952.87	1394.69	1174.17	1005.77	947.598	1155.73
972	0.05	8	104.173	191.13	587.688	410.216	151.627	108.496	81.0862	57.3921	36.9589	26.3071	20.004	17.6008	15.0588	12.055	12.8057	12.4927	79.0143	48.5801	34.9989	24.0038	14.5565	9.5366	8.94251	11.1663	9.37064	29.8576	57.2222	42.3525	39.8544	41.4399	37.2938	23.9147	13.3047	9.23821	6.02437	5.34663	5.51332	22.2405	77.2836	293.175	77.7263	58.9855	48.368	32.5736	14.6351	9.35914	6.78835
613	0.05	0.85	121.219	252.331	322.668	733.855	1490.77	843.178	66.6352	53.6759	46.6845	81.1055	111.298	106.087	89.3641	75.4944	151.79	296.103	249.579	89.9002	229.127	32.8663	31.7372	32.8457	31.813	32.7022	33.6393	45.6062	290.657	354.726	642.096	243.072	31.6446	25.9062	24.0616	24.7354	48.4076	63.3595	60.4036	87.732	324.669	390.332	530.139	427.173	465.613	53.9007	51.1549	53.3863	55.0676
1086	0.75	1	0.867425	0.783481	0.867425	0.713462	0.737244	0.713462	0.737244	0.737244	0.713462	0.737244	0.713462	0.737244	0.737244	0.665898	0.737244	0.594372	0.614184	0.594372	0.614184	0.614184	0.594372	0.614184	0.594372	0.614184	0.614184	0.554747	0.614184	0.473276	0.489052	0.473276	0.489052	0.489052	0.473276	0.489052	0.473276	0.489052	0.489052	0.441724	0.489052	0.386243	0.399118	0.386243	0.399118	0.399118	0.386243	0.399118	0.386243
1295	0.15	10	69.2268	68.6611	43.2034	31.7566	35.3636	20.9566	15.663	11.4356	9.79728	9.60118	11.3762	15.8642	24.8881	30.3777	20.7069	15.555	25.6465	74.313	31.1498	18.3991	16.0825	18.994	93.7804	28.5374	36.8284	30.1231	36.91	76.2205	82.8671	31.9547	24.3589	18.0954	13.1616	15.065	119.755	132.921	68.6863	135.794	115.915	34.0916	102.347	27.8278	24.0328	21.6004	20.1367	16.1074	14.5163
1139	0.15	9	7.47114	9.79527	7.96525	7.11797	7.62415	6.52225	5.4584	5.27029	28.412	10.9225	18.655	24.0699	9.2486	19.1979	23.0491	11.8759	11.2808	12.2828	9.62942	8.65308	7.78121	70.5657	14.3835	12.043	14.4561	15.0873	15.6194	11.3938	56.9406	45.2398	21.1279	17.8663	15.2035	14.1138	12.7948	18.651	21.7736	20.1755	18.9821	17.0417	14.6655	13.4911	10.1766	9.36951	8.50631	13.9543	14.3577
1862	0.6	1	771.762	487.7	1767.2	427.289	307.142	157.481	122.7	96.689	79.2784	119.639	148.036	131.971	124.262	785.886	249.868	267.835	106.89	165.724	78.9382	63.9524	49.7655	42.8974	35.2676	86.8315	964.752	1170.06	373.489	435.288	155.384	117.337	93.0515	92.3702	64.6209	84.3912	202.182	957.389	396.354	748.779	614.139	634.958	270.616	157.038	115.718	91.3764	79.7863	70.7639	455.669
629	0.05	0.35	2058.14	4384.01	3857.67	2146.42	3301.01	4755.61	2145.94	1768.06	1711.02	1769.88	1710.91	1769.27	1768.42	1591.35	1793.39	1642.25	1694.19	1577.13	1742.27	1622.33	1562.73	1662.27	1562.62	1621.76	1695.08	1487.4	1627.97	1504.99	1550.43	1492.41	1595.37	1474.92	1323.03	1328.63	1324.98	1538.08	1385.78	1314.85	1532.45	1286.74	1274.57	1262.72	1308.72	1607.95	1357.92	1482.39	1308.44
1000	0.65	3	20.7452	68.9433	51.2852	38.6326	24.0086	18.6529	16.2438	14.102	12.1211	16.097	22.177	37.0443	21.0997	48.6361	26.1608	18.2909	81.1531	95.1819	29.1808	22.1912	17.6789	22.7448	53.5391	47.9554	71.2724	72.2544	34.352	24.6885	24.4804	41.0277	20.046	23.3054	17.8627	14.9394	26.7586	150.334	29.7759	24.1055	23.2456	142.424	44.7342	24.7612	20.8457	17.8179	15.1338	85.5202	91.7239
7306	1	10	7462.7	6263.31	15238.6	6851.22	4269.77	2540.24	2012.21	1697.31	1468.97	1602.47	1441.25	1656.11	1896.46	6051.61	4121.98	4321.16	2021.7	1964.69	1182.21	973.246	762.026	663.71	606.155	1862.52	9595.75	9052.13	6787.48	3709.18	2563.91	1996.51	1766.47	1677.73	1475.46	1363.6	1436.22	8950.78	5290.74	7300.36	5788.34	8007.59	6595.59	3010.9	2031.39	1632.1	1349.47	1226.96	1958.88
991	0.1	1	36.3448	123.469	190.04	144.24	67.8982	54.9982	15.884	15.2265	12.0187	10.7773	9.20958	12.2727	9.04967	9.04734	13.6459	10.3933	23.0051	25.5448	145.635	67.923	35.0243	40.4386	154.94	115.156	85.9562	129.897	112.527	59.9017	103.344	184.516	32.6129	25.4651	19.536	16.4526	13.3842	12.0063	11.125	23.4833	35.8283	139.686	50.7847	41.9158	435.307	204.641	40.9	42.0593	41.7667
7317	0.15	4	149.46	145.389	377.406	70.5109	69.554	39.2704	35.5939	29.3269	23.9796	21.5495	18.5031	19.3953	25.0253	114.012	60.0284	51.5957	35.6918	30.004	25.3862	20.9033	17.298	15.3286	14.4978	49.5094	332.298	158.706	93.1693	64.9085	41.1062	33.158	28.5278	26.6915	25.0588	21.8839	33.8665	259.717	91.0322	157.599	65.0205	224.133	239.976	50.6807	40.0177	33.5505	27.3189	24.2139	118.453
998	0.45	1	199.623	172.213	168.904	362.127	470.772	338.299	187.15	180.796	178.223	180.192	166.672	165.408	159.077	139.401	173.469	151.901	146.653	73.9794	7.03713	0.999197	0.969732	21.8637	33.4623	30.9244	29.7204	28.9203	39.1072	27.7337	14.8439	25.3558	56.765	60.4323	61.1665	62.9159	60.4954	60.072	54.9617	39.2089	89.3091	166.732	99.9934	85.5309	123.664	126.166	121.745	127.82	119.518
1716	0.2	2	71.0473	96.963	189.611	75.6119	47.7632	35.1541	31.428	25.2737	20.8803	19.8481	19.8261	38.9514	32.4658	118.931	42.6659	37.8388	197.124	71.5893	40.1673	34.1959	28.1975	25.0058	23.0038	58.0299	248.484	275.083	105.413	66.4148	47.581	49.7673	38.6368	30.9285	27.6925	27.0686	26.6739	525.881	94.0265	95.9406	108.549	268.996	297.964	108.652	54.1056	47.2109	41.1236	174.943	291.166
1896	0.05	2	586.208	486.155	1132.42	527.647	411.836	295.702	255.048	225.056	212.297	253.52	216.137	205.362	175.777	645.606	358.849	292.379	216.44	202.179	172.426	171.657	139.699	139.883	119.592	169.273	509.704	712.526	400.554	500.717	290.701	253.125	233.702	222.444	163.704	197.621	168.876	560.34	447.676	487.063	592.907	464.066	319.67	251.058	219.753	197.497	244.784	164.85	268.863
1883	0.05	2	288.65	206.139	493.963	128.393	67.7553	44.7884	33.5643	24.8821	19.1503	17.5936	22.2415	30.9382	28.8749	265.842	69.7871	41.9961	76.9026	68.1688	27.9858	19.1487	9.17504	12.4228	5.35205	44.0236	334.966	326.196	121.028	123.26	66.3173	44.8562	35.2386	26.0521	17.8288	19.392	18.2347	121.557	193.462	261.962	264.409	246.714	107.045	85.5228	40.8368	30.346	28.1522	16.9461	62.744
1285	0.05	9	4.31732	4.59396	6.27373	9.33734	39.2481	10.2798	4.3329	3.51951	2.68598	2.30692	2.28692	13.9102	7.76483	11.3531	15.5781	8.04225	7.32625	100.182	17.7224	15.3354	14.2605	14.5738	14.6991	14.0648	9.87599	5.139	4.72881	5.42777	18.0764	6.48689	4.15626	3.34141	2.51943	2.05068	1.66733	3.26971	11.4399	37.9788	29.783	8.27581	11.6762	6.15611	13.2814	12.409	11.1663	10.856	9.39219
1266	0.45	6	15.085	20.9381	17.5918	16.3178	22.9733	14.952	13.5279	12.1649	10.4301	9.7598	8.66748	8.37502	7.8669	6.99611	8.38512	8.49775	8.89924	9.06009	10.7087	10.0714	9.01785	8.76178	8.90881	9.36577	9.26806	8.93265	10.3194	10.587	14.4404	11.856	10.9857	9.50138	8.01255	7.42867	6.72204	27.7461	18.2342	61.4706	36.1506	18.284	36.8676	15.1308	13.1831	12.1735	10.6282	9.80028	8.56405
1176	0.05	9	4.77391	4.9954	4.65356	4.79106	12.6289	23.1238	36.7768	31.5138	260.561	56.0232	185.686	123.963	24.0554	22.6928	52.0594	26.949	25.8831	32.0785	38.1186	27.6016	16.9827	54.2511	16.3136	15.7596	17.3163	23.0591	19.2618	12.6387	134.164	152.058	69.1562	55.6363	36.1545	22.8005	14.6076	12.7531	38.7029	79.7349	29.8031	20.1369	22.3523	34.9282	39.6563	31.7504	14.4336	125.043	54.8022
924	0.65	0.05	24.6935	22.3038	24.6935	23.8969	24.6935	23.8967	24.6933	24.6933	23.8967	24.6933	23.8967	24.6933	24.6933	22.3036	24.6933	23.8967	24.6933	26.293	27.1694	27.1694	26.293	27.1694	26.293	27.1694	27.1694	24.5401	27.1694	26.293	27.1694	46.747	48.3052	48.3052	46.747	48.3052	46.747	48.3052	48.3052	43.6305	48.3052	95.9867	48.3052	48.9458	50.5773	50.5773	48.9458	50.5773	48.9458
758	0.05	4	90.5058	81.5884	88.8808	82.5052	79.2261	64.0287	63.5128	62.685	61.8693	64.6749	63.8924	67.2184	67.6284	61.2068	67.1502	64.9551	66.1723	40.4415	41.7152	41.2485	41.1197	49.0784	50.5905	54.4371	56.7372	51.2518	56.182	55.0356	55.4994	73.7971	75.6966	73.3927	68.9701	77.2799	79.2947	82.8112	83.8432	74.1119	80.0885	74.1869	71.0554	60.8389	62.5616	59.4699	56.7873	61.1943	61.6485
1257	1	10	0	0	0	0	0	0	0	0	0	0	0	0	0	0	0	0	0	0	0	0	0	0	0	0	0	0	0	0	0	0	0	0	0	0	0	0	0	0	0	0	0	0	0	0	0	0	0
895	1	0.5	2936.57	2668.59	3018.87	3132.01	3058.74	2892.26	2885.39	2411.45	2215.89	2296.21	2226.73	2300.29	2296.51	2072.07	2289.92	2217.6	2280.56	2187.05	2253.02	2039.79	1924.5	1993.15	1931.75	2000.75	2001.38	1936.19	2098.65	2192.05	2274.77	2342.24	2233.45	2365.92	2331.75	2460.65	2429.74	2476.73	2525.92	2288.25	2735.32	3245.38	3450.82	2892.33	2822.9	2792.36	2643.07	2690.2	2578.26
1317	0.3	7	3.71077	3.68224	4.14548	4.47507	59.421	13.8121	4.7276	224.504	27.2216	21.7651	13.9308	27.0392	12.6199	8.62555	7.70598	6.80682	18.7499	80.4413	32.5985	19.5041	18.8014	47.1861	23.1804	13.3567	13.1505	11.7393	15.0691	11.1905	11.1838	9.87241	9.49682	7.87213	6.91858	7.53429	6.98833	7.7107	4.85641	3.72211	3.77885	3.28311	2.56813	2.40915	6.11639	4.05423	3.11319	4.03474	5.50448
1242	0.25	7	10.5192	9.68458	9.76239	5.94141	5.54134	5.08648	4.5412	0.608819	312.351	174.94	45.8784	49.3594	47.6559	39.0939	37.4768	32.6695	18.9918	7.87388	7.46402	23.1067	48.7269	17.4066	15.5872	14.9986	16.9134	11.0425	9.26515	4.49532	2.02712	0.298384	0.274507	0.248947	0.229239	0.222992	0.228502	5.66905	149.509	98.6921	24.6553	34.2767	4.73673	3.02995	0.673207	0.227068	0.206286	4.42388	18.5693
107	0.85	3	202.104	87.5676	109.701	57.926	30.1683	20.9979	17.0806	13.8671	11.0323	9.41269	8.87091	67.2716	67.1005	96.0631	67.0653	32.9192	23.4491	16.2971	13.3778	11.1033	9.01711	7.92757	57.57	371.928	186.246	221.381	129.19	83.9537	38.5194	28.3971	22.8494	18.0667	13.9868	11.6433	16.0993	210.847	139.33	266.197	202.646	61.8888	49.8037	28.8589	23.1499	18.273	14.1659	11.8052	41.292
1841	1	10	161.398	170.579	470.759	135.148	72.7935	38.6446	29.4067	21.6171	16.8302	12.9621	14.3455	13.8557	16.7307	162.541	74.0067	72.7117	22.9005	28.3451	13.8148	10.7683	7.72473	6.24459	5.8175	42.9194	288.638	304.727	97.7534	69.7376	34.5768	23.8506	18.1395	15.1437	9.94403	8.43895	42.6338	246.133	86.2045	132.574	92.5246	126.172	101.697	45.366	29.62	21.3664	15.9721	12.0495	33.3557
907	0.05	0.7	267.55	218.023	293.254	241.415	156.397	126.712	71.6938	62.6206	83.5644	79.4737	69.425	65.3666	57.8735	70.3052	78.0272	97.0189	73.2431	59.5087	152.535	68.6774	68.2156	67.8769	71.391	68.3138	66.5914	147.162	524.075	379.381	403.617	369.379	266.934	170.451	135.091	124.747	211.158	391.223	272.71	435.598	627.703	820.622	530.457	318.02	348.578	183.076	139.907	213.948	452.753
80	0.65	2	400.503	287.425	308.518	215.954	102.922	87.4321	22.5599	18.6592	23.4701	25.8241	168.169	485.97	90.2091	352.142	204.607	206.759	137.004	170.089	31.8948	19.0438	35.072	104.593	164.668	624.324	332.116	551.861	350.357	337.656	119.877	85.4832	36.7149	27.0962	49.8248	131.074	195.897	457.408	473.742	524.923	468.156	164.646	157.304	112.46	101.36	34.2722	26.6769	29.541	301.465
1236	0.05	7	2.30197	2.21689	2.33263	1.97739	3.29602	2.70207	2.36013	1.3489	1.58308	1.0215	1.27851	5.11215	5.84805	5.00534	8.88961	9.06476	7.21479	7.43043	3.26125	2.61941	2.05603	16.2101	5.79421	5.57048	4.99108	4.95085	5.83537	5.31114	5.49508	9.54438	27.3977	26.4549	20.1961	7.449	5.80576	5.11142	5.08201	5.65873	8.25724	9.25319	9.24604	8.23669	2.98948	2.52991	1.89462	1.61425	1.34932
981	0.05	3	123.295	137.805	291.668	467.384	172.47	124.945	118.808	116.391	109.469	111.523	106.798	106.449	105.815	94.9063	105.23	101.483	111.596	84.4241	22.4907	15.5939	13.1271	12.3825	13.0787	15.2237	16.3235	31.7512	33.909	19.7772	23.1745	22.7929	38.1161	36.8651	34.1394	34.3435	32.6009	33.2365	33.3566	44.8187	54.775	78.7199	50.622	43.1632	74.894	72.8709	68.7495	70.2145	66.6934
1093	0.15	0.8	18.8646	27.588	35.3083	30.1548	36.5788	27.6651	16.6773	9.86349	10.6452	11.9255	14.141	25.3653	25.1881	37.2195	42.3915	39.5303	45.6581	69.8327	62.2517	60.5773	21.2015	22.9634	23.0102	23.1954	55.9191	69.9315	69.582	59.859	71.0738	138.148	130.459	32.5026	20.2881	16.8147	20.1593	134.406	85.4505	58.823	59.7189	53.496	160.809	65.8084	47.3893	21.5131	15.3738	15.4636	13.4113
1709	0.5	0.75	107.013	90.5417	143.333	123.621	99.0288	18.9853	18.8427	17.078	13.9966	13.3742	13.2766	14.3208	16.7314	28.59	29.6962	26.037	29.3844	94.5707	78.0253	74.4514	71.3193	74.3611	71.2477	81.5306	95.0294	101.779	110.125	79.4938	78.9412	59.3181	56.3988	52.1601	48.2035	48.8179	50.2056	57.1126	56.5691	61.7594	70.2295	69.9082	73.9613	65.0657	62.3888	58.7863	55.2808	56.6205	57.1479
1017	0.05	2	23.0373	78.249	92.5858	32.9283	19.5073	9.18682	7.62914	5.88957	4.42453	3.61272	3.27938	3.19219	3.17961	19.8315	14.1204	8.89178	47.1527	58.8444	24.3074	9.18868	5.82965	5.65209	7.50575	9.56573	119.119	218.225	85.267	65.2301	23.8821	12.8868	9.69907	22.2299	28.3933	20.3714	46.8933	483.728	39.6062	31.842	45.9781	166.067	86.4955	92.7085	88.6727	47.998	10.2427	10.3986	95.3565
1194	0.15	8	12.5549	16.14	16.8892	14.4231	13.3467	11.2887	8.8956	7.44176	6.44961	12.466	10.9349	13.7287	12.4581	9.80092	12.3223	12.0958	11.598	10.7484	9.08978	7.59121	6.47355	127.18	33.1255	26.4736	22.29	27.0312	24.8939	19.8686	78.8603	43.6767	28.0563	21.8862	16.6524	14.0998	11.5579	10.7272	10.1801	9.47105	11.1786	11.3192	10.6986	9.86885	8.4524	7.10737	5.85578	5.34875	4.72084
[truncated: 433 more columns]

## Sheet: Storage(WG inflow-No Demand)
grand_id	a1	a3	1980-01	1980-02	1980-03	1980-04	1980-05	1980-06	1980-07	1980-08	1980-09	1980-10	1980-11	1980-12	1981-01	1981-02	1981-03	1981-04	1981-05	1981-06	1981-07	1981-08	1981-09	1981-10	1981-11	1981-12	1982-01	1982-02	1982-03	1982-04	1982-05	1982-06	1982-07	1982-08	1982-09	1982-10	1982-11	1982-12	1983-01	1983-02	1983-03	1983-04	1983-05	1983-06	1983-07	1983-08	1983-09	1983-10	1983-11
610	1	4	36620.3	36700	36700	36700	36700	36700	36692.3	36622.9	36570.2	36548.5	36547.5	36554.8	36555.3	36551	36588	36678.1	36597.6	36462.4	36271.5	35960.2	35672.4	35413.2	35174.8	34948.3	34728.5	34630	34687.1	34670.5	34398.5	34050.6	33683.7	33334	33051	32798.3	32577	32455.7	32445.3	32524.4	32785.4	33112.2	33062.7	32779.7	32476.6	32362.7	32339.9	32341.3	32355.7
753	0.8	2	24315	24398.9	24509.5	24848.1	25595	26093	26096.8	25589.5	25092.6	24733.5	24484.9	24232.3	24079.7	23918.7	23759.3	23664.5	23729.4	24763.3	24949.3	24518.2	24008.9	23626.5	23372	23115.2	22942.6	22804.6	22780.3	23701.8	25558.8	27016.3	27815.3	27649.8	27313.9	27238.7	27370.8	27511.2	27829.7	28209.3	28489.9	28995.3	29623.1	30218.5	30072.5	29452.2	28805.2	28363.4	28105
870	0.8	0.05	25011.3	25232.2	25426.5	25656.4	25750.9	25802.1	25642.4	25363.1	25109.6	24942.6	24912.3	24902.8	24884.5	24860.1	24865.3	24817	24664.8	24496.5	24180.7	23715	23183.6	22762.7	22392.9	22079.1	21751.6	21409.5	21130.9	22490.6	24790.6	26179.5	26749.3	26935.2	26966.5	27104.4	27368.7	27574.5	27740.7	27823.6	28004.9	28517.7	29060.6	29105.6	29016.5	28873.2	28729.6	28661.8	28636
597	1	3	22930	23175.6	24002.9	24622.2	25070	25070	24933.7	24417.5	23924.6	23570.9	23335.9	23115	22851.3	22521.4	22123.8	21764.4	21780.9	21732.2	21251.8	20592.5	19946	19389.8	18991.9	18683	18354.3	18035.2	17918.1	18057.3	18478.6	19103.7	19017.5	18542.7	18118.2	17846.2	17714.9	17662.5	17599.9	17605.6	17959.5	18710.1	19489.6	20962.8	21485.5	21246.1	20906.3	20678.7	20546.3
307	1	5	14276	14140.3	14057.6	14122.7	14240.2	14290.8	14218.1	13815.8	13549	13441.3	13423.2	13412.5	13409.7	13398.8	13473.2	13780.4	14434.8	16130.5	16226.1	15879.3	15555.6	15427.7	15441.8	15476	15506.3	15542	15941.5	17034.8	18236.3	20020.3	20959.9	20834.8	20645.1	20591.2	20654.3	20740.5	20868	20971	21081.6	21221.2	21319.4	21324	21027	20540.3	20058.2	19823.9	19707.2
1753	0.05	4	3412.47	3407.97	3406.36	3408.08	3340.59	3259.1	3193.03	3095.43	3030.79	3007.27	2995.87	2999.26	2971.78	2988.5	2979.24	2962.49	2935.97	2982.58	2937.75	2888.62	2856.58	2811.2	2787.8	2785.42	2827.12	2886.51	2898.78	2896.51	2842.52	2778.59	2726	2670.3	2712.73	2678.12	2643.09	2740.69	2789.27	2805.36	2790.61	2822.47	2917.88	2898.88	2824.38	2717.57	2622.03	2582.18	2624.92
297	0.55	0.8	2924.89	1688.26	790.669	842.026	2075.27	3203.86	2875.71	2657.64	3017.74	3178.31	3294.66	3237.42	3386.95	3439.79	3525.56	3629.39	4837.75	6957.93	7434.2	7033.13	6134.3	5317.88	4317.53	3256.95	2053.73	943.343	718.006	720.716	853.297	1674.26	1984.98	1762.63	2223.73	2774.47	2959.11	2965.43	2976.41	2950.83	3079.52	3293.2	4224.54	5588.33	6798.83	6786.06	6003.44	5010.29	4265.29
1036	0.45	2	1663.75	1702.28	1747.2	1802.57	1820.23	1816.37	1777.1	1728.68	1684.08	1651.39	1623.47	1603.18	1571.67	1556.48	1541.32	1514.77	1499.25	1500.55	1487.43	1471.38	1450.22	1428.81	1438.78	1430.57	1437.98	1571.88	1620.23	1607.77	1590.95	1611.41	1657.3	1693.6	1730.31	1760.89	1801.39	2085.2	2217.08	2285.54	2334.63	2409.62	2550.69	2581.62	2566.22	2533.86	2502.49	2482.61	2523.91
989	0.35	1	692.242	675.145	882.778	1184.38	1212.85	1158.84	1084.22	1016.37	946.097	856.819	776.339	715.816	656.594	640.675	644.266	635.115	678.574	1045.45	1566.89	1619.55	1588.18	1521.51	1633.25	1708.94	1757.34	2064.38	2237.33	2301.72	2313.47	2584.96	2623.19	2461.15	2310.84	2081.66	1834.33	1864.7	1795.21	1684.64	1595.38	2144.27	2446.33	2442.93	2297.09	2106.56	1890.53	1712.11	1823.54
1135	0.45	3	2459.36	2426.97	2389.64	2343.13	2301.45	2270.78	2215.45	2158.02	2108.3	2136.28	2119.72	2123.15	2105.74	2076.85	2074.16	2058.74	2046.4	2049.67	2020.5	1981.95	1955.57	2049.01	2183.65	2202.26	2194.83	2226.47	2240.97	2237.97	2285.67	2463.46	2520.61	2521.28	2497.45	2472.12	2455.06	2446.41	2430.41	2446.06	2478.68	2488.96	2491.06	2497.27	2476.39	2431.13	2384.39	2380.7	2497.06
1269	0.2	6	3273.1	3296.15	3293.68	3342.09	3340.47	3294.31	3201.31	3115.43	3021.51	2976.31	2968.14	2953.97	2924.97	2912.74	2884.23	2829.86	2796.26	2820.43	2806.55	2719.68	2699.26	2653.83	2638.28	2618.97	2615.72	2624.85	2627.49	2633.88	2658.56	2601.19	2559.13	2520.67	2460.74	2451.14	2466.42	2582.61	2680.03	2743.26	2791.94	2802.25	2805.12	2823.34	2780.86	2749.63	2709.99	2666.17	2646.94
1077	0.6	3	2579.5	2566.18	2552.86	2531.31	2529.24	2536.3	2493.15	2432.16	2383.28	2366.95	2346.17	2332.78	2308.45	2287.18	2275.04	2252.8	2240.91	2225.93	2183.61	2152.05	2123.39	2129.61	2187.62	2198.45	2193.02	2263.29	2276.89	2264.3	2286.24	2390.52	2390.01	2367.33	2335.63	2314.43	2308.29	2334.1	2336.41	2359.56	2388.47	2403.38	2432.4	2447.93	2426.98	2380.78	2338.59	2334.78	2382.45
1026	0.55	3	2231.79	2230.1	2232	2235.48	2211.47	2187.03	2155.07	2115.49	2079.53	2049.5	2031.42	2024.9	2005.31	1997.04	1988.47	1969.17	1961.64	1971.05	1963.42	1950.56	1934.01	1919.35	1942.02	1935.35	1932.89	2013.55	2033.64	2018.07	1994.32	1981.04	1960.87	1937.87	1925.99	1902.06	1888.95	2030.76	2058.49	2067.41	2057.36	2067.76	2119.97	2110.66	2089.12	2057.14	2025.73	2011.51	2028
740	0.05	0.05	942.282	950.773	942.722	906.891	836.407	782.216	757.201	783.294	869.026	886.332	903.935	910.572	896.623	879.328	851.188	829.363	800.53	861.767	910.317	908.91	937.044	1006.39	1008.06	1023.57	1050.96	1064.95	1048.9	1031.9	1010.56	999.552	1008.71	1016.15	1002.34	1099.93	1118.91	1113.71	1099.39	1077.92	1076.8	1047.28	989.822	973.762	979.411	964.951	1044.45	1102.72	1109.34
1294	0.35	6	1900.77	1876.42	1850.7	1824.94	1800.74	1775.76	1746.93	1718.6	1694.18	1675.79	1656.83	1645.51	1629.96	1616.94	1612.16	1612.22	1607.05	1628.16	1642.71	1635.05	1628.76	1624.15	1624.45	1619.53	1612.56	1606.66	1599.7	1588.78	1576.92	1561.89	1544.3	1525.44	1507.7	1491.78	1476.74	1463.24	1450.66	1444.94	1445.41	1443.43	1430.89	1420.06	1405.95	1390.76	1374.99	1360.68	1346.06
1848	0.2	0.05	398.343	378.83	597.734	853.812	759.922	626.374	479.907	370.274	357.885	359.132	429.027	502.967	394.084	454.656	417.602	425.909	370.827	385.499	372.445	370.778	371.075	370.632	370.963	375.038	567.502	796.739	919.59	1126.35	1095.79	885.085	660.188	441.059	365.425	361.466	375.571	887.803	1270.73	1339.34	1315.88	1388.76	1488.96	1467.33	1202.2	913.491	625.484	389.238	391.23
1869	0.1	2	336.39	346.325	469.492	690.163	627.918	502.608	372.24	332.091	332.858	333.26	331.945	332.034	331.965	331.162	333.741	331.055	344.118	362.093	371.286	369.013	369.135	367.995	367.583	368.508	402.92	524.392	616.573	771.211	827.286	634.04	429.907	332.24	331.561	331.861	331.038	623.336	904.216	991.011	977.683	1022.67	1016.42	968.981	763.151	532.854	346.512	331.083	331.401
1863	0.75	3	2688.08	2793.58	2963.36	3137.95	3101.98	3064.47	2999.93	2913.08	2823.85	2758.63	2703.38	2647.07	2577.29	2612.81	2619.08	2570.11	2497.79	2439.44	2361.22	2283.18	2208.41	2129.9	2060.21	2001.19	2151.88	2353.65	2441.24	2429.09	2437.21	2382.1	2320.04	2259.63	2190.37	2133.66	2087.31	2172.72	2272.22	2380.37	2446.02	2564.73	2555.97	2515.13	2452.47	2379.44	2316.46	2250.87	2214.44
1770	0.4	3	889.083	968.255	1086.27	1202.65	1192.05	1156.33	1110.41	1058.23	1005.73	952.001	899.204	853.207	811.014	843.176	893.057	894.355	886.543	888.653	872.102	841.685	811.056	776.259	747.172	758.085	873.51	1042.1	1161.64	1205.48	1183.46	1145.42	1097.61	1050.23	1005.45	951.587	902.392	972.731	1045.06	1091.44	1113.69	1120.11	1143.62	1166.89	1130.54	1084.62	1038.69	993.104	951.346
965	0.15	5	347.303	349.821	363.859	438.956	455.231	453.634	436.355	414.385	394.915	375.088	357.514	339.494	320.878	302.467	287.09	277.81	280.465	278.336	279.027	286.177	292.3	295.477	299.163	311.826	317.687	335.837	390.918	438.023	491.119	573.114	595.061	583.701	568.131	549.152	527.759	506.246	487.923	480.036	486.083	583.941	607.636	619.849	624.233	599.545	572.371	546	524.144
1247	0.25	4	744.77	730.658	715.146	697.386	683.347	667.716	642.203	615.096	591.776	641.369	638.152	667.928	674.4	668.148	672.078	671.811	667.469	661.291	650.093	636.159	624.495	684.136	766.903	773.017	774.369	782.625	789.503	790.618	812.405	862.478	886.866	876.494	860.737	845.188	831.344	818.239	805.057	798.474	790.692	783.646	770.284	757.114	739.435	720.285	702.026	685.054	668.734
7313	0.25	3	451.762	450.144	450.744	456.823	470.285	496.237	449.121	356.346	305.22	293.698	293.714	294.793	295.514	296.145	303.962	314.241	343.841	374.178	321.502	254.134	251.894	251.769	253.355	257.123	263.17	269.336	295.868	337.474	380.001	411.401	372.093	284.145	248.328	249.207	252.446	259.058	267.515	273.729	291.31	315.176	332.023	328.516	300.414	252.759	249.423	252.193	258.729
1287	0.5	3	1735.26	1739.01	1734.39	1732.99	1723.74	1706.16	1676.08	1650.88	1628.77	1620.65	1613.04	1611.4	1605.52	1602.52	1593.89	1580.06	1574.94	1588.19	1590.63	1566.6	1558.15	1551.09	1569.32	1569.38	1566.83	1564.4	1562.31	1561.29	1569.95	1565.21	1554.61	1535.25	1514.67	1511.27	1514.64	1535.61	1545.12	1552.87	1564.98	1563.92	1563.44	1569.55	1557.3	1549.86	1543.49	1531.2	1524
1186	0.15	7	565.142	581.243	573.962	573.263	573.338	562.032	544.022	523.304	503.915	491.602	479.429	467.449	451.886	438.161	425.671	412.265	407.419	421.062	415.014	403.192	395.125	389.555	387.65	379.748	371.201	371.293	367.311	360.728	357.245	351.463	342.766	331.532	317.895	309.236	304.745	335.189	343.331	356.273	373.042	376.601	372.18	368.453	360.407	348.519	335.936	324.852	316.457
1042	0.5	7	1273.69	1272.95	1272.57	1272.47	1259.97	1244.7	1222.86	1200.14	1178.08	1161.75	1150.34	1139.33	1125.83	1117.95	1109.21	1098.91	1091.01	1089.85	1076.93	1061.37	1045.75	1034.21	1029.34	1020.73	1019.85	1067.03	1080.98	1072.03	1061.18	1058.07	1045.46	1029.15	1015.52	1003.45	996.605	1087.1	1120.62	1120.54	1115.81	1124.74	1141.87	1135.65	1123.83	1104.16	1086.58	1082.29	1111.23
884	0.05	0.75	178.581	179.569	184.689	182.38	180.41	177.576	184.499	185.518	198.028	206.017	187.84	200.881	198.741	189.206	195.107	197.451	188.819	196.353	198.693	198.952	195.974	199.674	203.89	197.477	192.09	203.927	205.087	194.429	203.732	196.481	192.059	195.188	199.571	182.72	205.04	192.224	182.775	204.763	189.555	194.759	190.786	179.11	198.18	190.49	193.943	178.065	208.58
1273	0.2	9	783.202	772.265	759.718	746.197	734.355	719.856	696.38	673.264	655.707	644.524	632.295	627.842	619.723	611.135	605.778	600.529	590.621	584.945	574.663	558.727	547.082	544.1	542.605	536.653	530.048	527.314	525.4	524.293	530.288	533.65	527.487	517.356	507.691	499.938	493.303	487.534	481.932	479.458	477.424	474.942	469.688	461.624	450.487	439.504	429.911	422.31	415.378
961	0.05	8	0	0	0	0	0	0	0	0	0	0	0	0	0	0	0	0	0	0	0	0	0	0	0	0	0	0	0	0	0	0	0	0	0	0	0	0	25.6852	67.2744	113.038	241.286	292.587	297.111	264.148	231.783	228.756	228.727	241.164
1144	0.1	1	230.815	238.227	235.833	236.051	236.044	229.68	219.664	221.081	223.959	245.02	241.918	242.506	233.727	226.754	223.142	215.283	213.266	228.423	225.655	213.353	216.997	233.64	251.355	246.559	237.699	252.628	255.59	251.848	249.115	277.106	277.996	261.752	239.292	222.672	209.684	241.189	256.682	252.177	255.749	248.105	242.514	233.946	230.778	215.23	217.61	217.424	215.044
616	0.85	4	211.442	210.643	209.35	189.198	192.362	149.501	187.822	200.628	186.014	179.072	173.164	193.764	211.519	205.475	198.467	187.809	193.882	194.496	191.89	196.722	202.35	195.139	188.495	183.217	177.881	174.001	213.933	194.858	191.397	198.416	195.422	186.982	213.384	207.217	200.263	195.451	189.539	185.68	200.651	199.865	200.745	198.353	201.693	200.077	188.984	187.858	215.262
911	0.15	0.6	199.807	203.931	197.837	199.869	203.513	202.456	235.769	275.665	314.288	344.314	371.465	395.732	418.78	440.581	473.124	497.42	517.579	531.673	430.649	241.079	211.532	211.031	211.475	210.485	210.639	224.786	282.241	306.699	300.439	334.699	313.012	303.791	268.129	221.494	216.954	303.706	358.877	433.897	744.803	1191.9	1435.53	1554.96	1346.8	754.732	245.98	196.37	192.447
1006	0.4	5	616.507	620.255	628.173	636.374	627.114	615.812	597.734	577.957	561.664	548.347	540.641	533.068	521.711	517.657	515.493	507.627	510.807	536.667	550.926	549.713	543.276	541.499	570.545	574.098	581.551	623.889	633.592	632.45	628.875	636.966	626.952	621.357	631.445	620.698	614.905	671.96	674.441	674.491	668.63	697.3	738.685	734.052	722.899	703.603	685.806	695.52	743.388
1048	0.15	2	440.501	433.311	430.616	439.274	447.873	455.614	449.97	437.85	427.743	418.013	408.509	399.867	388.764	378.663	370.101	360.132	352.138	345.807	335.451	329.216	319.89	313.304	314.374	311.035	304.843	311.939	313.453	308.983	313.526	335.831	337.991	332.988	325.112	318.327	313.059	312.786	308.516	308.045	307.065	317.04	324.066	330.38	329.354	322.819	317.112	319.986	325.936
1123	0.95	5	1632.1	1642.19	1641.48	1635.58	1631.14	1621.25	1602.71	1581.49	1563.52	1584.75	1581.57	1585.2	1578.33	1577.43	1576.66	1569.92	1567.11	1583.83	1579.11	1566.38	1553.43	1543.42	1539.5	1533.86	1528.73	1556.59	1565.03	1560.57	1574.97	1605.23	1598.45	1586.71	1571.22	1558.43	1549.97	1595.86	1613.28	1613.87	1621.89	1623.8	1649.57	1655.75	1648.69	1630.81	1612.56	1598.81	1588.97
1032	0.4	2	379.284	377.774	382.34	399.111	402.667	394.779	377.87	360.386	348.457	336.778	325.663	315.588	302.11	290.249	281.256	272.466	268.337	267.512	259.895	254.413	244.988	239.532	250.411	252.684	250.361	265.311	269.543	268.98	279.218	326.607	333.08	327.986	321.85	315.845	310.864	314.751	320.859	337.942	351.339	387.047	414.623	428.545	423.154	408.457	396.93	399.014	410.064
1774	0.4	0.85	292.557	322.151	444.25	541.8	487.079	449.083	454.208	444.523	428.299	407.317	381.373	354.34	324.3	333.836	408.597	492.736	538.993	592.882	582.188	545.207	499.992	447.962	394.829	345.369	377.34	688.04	941.935	1059.44	1068.48	1016.58	916.788	807.546	716.03	609.337	518.119	520.372	555.746	649.202	715.456	789.422	835.962	844.929	790.92	719.771	639.054	552.828	466.13
1781	0.25	0.85	200.754	218.906	305.715	443.731	454.676	436.318	395.353	341.756	286.6	229.115	188.793	187.295	186.708	223.114	284.002	333.426	322.67	323.501	298.761	262.477	223.576	190.733	188.804	188.208	226.054	421.981	578.992	638.532	624.689	565.61	489.675	416.651	336.402	249.877	188.374	206.944	236.265	322.913	432.938	573.712	616.419	590.895	527.394	452.287	372.004	288.828	209.005
355	0.4	4	420.922	420.138	420.199	424.234	437.987	438.135	367.634	269.754	229.328	219.054	218.582	221.303	222.846	223.806	226.002	234.129	253.687	268.921	214.282	175.578	175.643	175.756	175.919	177.815	180.407	182.617	186.07	194.07	206.738	216.482	187.778	175.651	175.708	175.832	178.809	184.89	191.451	197.066	205.377	217.998	251.061	272.711	235.739	176.199	172.406	175.131	179.472
1101	0.4	3	868.854	869.642	891.301	937.316	934.533	918.561	898.068	875.067	851.049	832.159	817.92	817.523	807.044	806.415	802.844	801.534	789.242	780.241	768.464	751.25	735.141	718.388	703.63	689.304	681.47	692.429	701.305	710.518	708.727	698.626	684.98	671.047	656.252	643.012	630.95	687.269	754.263	779.542	783.103	806.626	835.642	856.179	840.709	819.75	798.478	780.137	765.688
1023	0.05	2	157.139	158.236	158.322	197.522	193.865	199.339	175.78	159.094	159.027	159.723	159.573	159.533	160.14	159.82	160.106	160.077	160.438	159.685	160.667	161.199	161.992	162.571	161.064	161.361	161.573	160.887	160.963	161.17	161.359	160.818	160.897	161.328	161.936	162.485	162.564	162.525	162.462	161.732	161.418	194.628	208.283	203.004	181.335	160.356	159.43	159.784	159.804
1060	0.55	5	918.189	914.473	912.4	910.693	902.136	892.364	876.851	859.999	847.125	840.852	834.88	833.265	827.647	824.195	822.835	817.822	816.766	816.622	807.561	800.271	792.823	788.04	794.257	792.469	790.128	806.939	805.851	799.86	793.499	791.463	782.856	770.663	759.844	752.033	747.881	779.476	783.188	787.8	784.671	781.25	789.997	786.042	775.14	762.252	751.568	745.777	744.264
1864	0.1	2	152.863	148.344	195.837	265.702	249.849	213.088	170.816	148.586	148.764	148.512	148.005	147.152	147.696	146.821	147.23	147.246	153.084	161.991	164.843	163.066	161.962	159.591	157.905	158.858	175.38	213.495	244.965	285.349	298.49	253.094	202.258	157.613	147.916	147.505	148.342	248.63	329.188	347.37	345.46	366.021	384.657	379.182	321.059	253.499	186.27	148.464	149.904
1797	0.65	0.8	1105.34	1125.47	1154.87	1184.59	1179.57	1162.06	1137.28	1111.36	1089.44	1075.5	1066.09	1064.98	1058.86	1072.04	1080.53	1084.14	1071.76	1065.92	1042.05	1021.51	1005.9	988.605	981.659	982.638	1003.13	1042.67	1067.98	1070.89	1058.35	1042.95	1023.66	1018.5	1010.55	999.051	995.798	1024.34	1045.47	1066.4	1078.7	1100.93	1110.79	1104.58	1082.33	1056.58	1035.38	1021.63	1018.24
305	0.85	0.1	177.552	110.42	109.78	140.039	423.654	1291.8	1381.28	951.512	504.008	179.775	116.719	137.135	259.095	185.043	252.29	198.294	286.27	758.57	1044.54	822.554	515.881	405.327	382.354	650.334	676.153	883.16	1424.7	1424.7	1424.7	1424.7	1384.21	960.482	423.262	190.193	119.272	121.961	234.901	175.251	225.64	145.11	101.932	108.631	583.139	1242.94	1424.7	1424.7	1424.7
968	0.05	7	140.575	140.28	140.338	158.305	171.106	172.017	166.807	160.908	155.343	149.445	144.786	140.428	140.024	139.982	139.942	139.927	143.526	143.565	141.126	141.273	140.528	140.268	140.434	140.09	140.196	139.788	140.195	139.911	141.214	144.934	145.51	141.452	140.572	140.434	140.504	140.496	140.47	140.466	140.668	147.52	146.012	147.5	145.789	140.681	140.011	140.736	140.397
1019	0.1	0.05	127.076	139.191	148.806	147.247	138.753	141.46	144.218	145.304	145.615	145.632	145.735	145.945	145.292	150.94	170.181	179.544	196.589	231.651	202.12	164.51	139.215	139.152	138.099	137.064	143.121	200.348	255.175	238.284	202.347	167.924	141.965	139.221	139.219	138.95	138.979	263.871	352.39	352.923	344.848	387.895	466.851	417.612	327.497	232.875	148.956	132.366	132.407
1302	0.05	7	160.484	148.583	139.329	138.876	138.89	138.914	140.935	146.22	154.74	165.822	175.645	188.431	198.875	209.695	222.678	235.326	246.695	277.819	285.886	266.526	249.059	232.489	216.483	199.259	180.625	162.887	145.319	138.728	138.664	138.756	141.484	146.646	152.125	158.971	166.571	174.698	182.78	192.206	203.573	214.879	221.617	229.315	225.042	210.762	196.601	183.653	170.532
1824	0.2	1	762.391	775.04	796.296	820.16	810.988	793.012	770.702	742.483	717.224	706.17	702.054	701.096	696.428	707.938	710.629	708.565	696.273	685.968	674.829	656.869	640.749	626.893	623.367	628.086	649.722	672.758	681.941	689.255	681.644	666.528	643.785	628.706	613.758	604.43	600.071	634.732	661.238	682.138	687.203	703.372	717.384	720.324	694.327	665.058	641.462	627.415	628.513
1316	1	0.05	0	0	0	0	0	0	0	0	0	0	0	0	8.4067	21.5776	42.3583	72.369	136.708	204.171	275.018	274.323	274.438	274.116	285.832	285.399	280.316	273.704	268.581	258.415	248.335	237.074	226.199	214.968	204.857	196.566	189.551	181.734	174.132	168.424	163.093	157.393	151.55	146.685	141.617	134.984	130.31	127.451	126.618
1835	0.9	0.5	863.073	882.407	922.819	971.68	969.652	952.214	919.678	885.978	854.102	841.318	825.425	818.321	806.299	814.909	818.786	814.959	794.417	777.32	751.282	728.183	710.194	685.342	672.833	672.046	704.491	747.795	770.227	777.076	767.663	744.576	720.306	710.144	689.277	669.703	659.923	692.469	721.337	751.274	770.379	804.676	826.916	835.583	812.585	777.491	747.097	722.635	712.238
1847	0.3	2	1223.72	1238.01	1267.38	1290.7	1285.64	1268.83	1240.74	1212.17	1195.89	1213.82	1212.91	1217.33	1214.61	1229	1233.39	1238.91	1219.33	1211.63	1189.51	1174.92	1170.15	1156.58	1156.88	1168.97	1198.89	1225.76	1232.86	1237.29	1236.98	1219.57	1198.74	1179.63	1160.02	1153.19	1152.76	1183.68	1197.7	1213.46	1223.75	1235.93	1237.94	1236.14	1218.02	1192.32	1173.94	1164.41	1167.21
1231	0.4	5	661.967	666.822	664.129	659.786	653.835	643.435	629.846	617.689	607.638	599.935	592.563	586.244	578.879	572.032	565.287	557.292	551.614	567.78	568.482	560.681	554.698	551.434	552.472	551.741	549.435	548.651	546.788	543.694	540.593	535.922	530.105	521.945	513.879	507.406	503.609	522.721	526.389	529.3	537.718	537.63	535.172	533.11	528.881	522.742	516.54	510.218	504.972
1140	0.05	0.05	133.295	133.75	133.381	132.762	133.61	135.406	131.449	128.092	127.786	127.671	127.532	128.079	127.131	126.474	127.175	126.887	127.209	127.917	128.082	128.926	129.34	129.527	129.355	128.935	128.453	128.305	128.3	128.072	130.717	137.015	140.352	131.722	127.898	127.131	126.258	126.221	127.481	139.743	135.466	129.015	127.466	127.68	128.017	128.299	128.286	182.25	286.928
1296	0.25	10	527.399	527.586	521.862	515.417	510.042	504.296	494.604	484.587	475.78	468.778	461.732	455.123	447.765	442.097	435.837	428.29	422.529	427.789	426.979	419.429	414.061	409.285	414.012	412.379	408.001	403.961	400.002	395.82	397.979	396.072	390.283	383.141	376.748	372.107	368.159	371.814	371.378	378.251	386.42	392.317	394.631	399.423	394.585	389.267	384.679	379.913	375.103
1659	0.05	5	126.052	127.994	134.02	131.189	125.834	126.051	126.037	126.022	126.073	126.104	126.058	126.041	126.041	129.955	126.121	127.176	132.277	127.944	125.922	126.512	131.689	125.997	125.98	125.953	127.138	147.882	190.897	195.562	182.504	163.819	138.257	125.872	125.946	125.994	125.705	131.253	125.756	126.136	128.477	127.819	127.268	126.945	125.865	125.956	126.06	128.167	132.157
1277	0.05	10	139.261	142.154	143.916	146.05	156.532	165.847	150.865	126.67	123.312	123.182	121.934	124.776	124.564	124.664	125.203	125.124	124.543	138.009	135.978	124.58	124.504	124.633	124.669	124.413	123.642	124.055	124.395	124.36	124.841	124.692	125.141	125.283	125.349	125.414	125.732	127.236	130.924	141.07	154.632	167.498	173.471	177.646	164.331	136.108	123.92	122.668	121.322
1021	0.05	6	122.526	126.899	129.156	139.799	142.036	139.838	132.646	123.061	121.574	121.798	121.77	122.001	121.805	121.88	122.013	121.821	122.822	122.469	122.352	121.893	122.559	122.893	129.538	126.613	122.108	130.65	131.946	128.901	134.931	146.859	146.183	139.234	129.704	122.248	121.62	121.673	121.825	121.88	127.663	152.85	152.767	155.526	150.541	139.342	132.154	127.37	122.898
1280	0.6	7	156.218	150.091	142.675	135.691	129.28	121.509	120.719	120.854	133.672	157.449	155.852	159.712	160.612	160.505	162.941	162.177	155.944	148.499	132.561	120.536	120.724	124.114	126.359	122.792	120.303	120.148	120.556	120.577	120.341	120.25	120.056	120.51	120.521	120.516	120.907	120.742	120.56	120.14	120.867	120.336	120.63	120.677	120.514	120.588	120.743	120.755	120.878
1120	0.95	10	813.195	811.343	808.154	804.149	800.624	795.349	786.517	778.458	772.038	767.314	762.964	759.577	754.946	750.129	745.715	739.901	734	727.779	719.437	712.519	707.064	702.83	699.243	694.979	690.415	687.062	683.35	679.015	685.293	711.354	719.024	722.236	723.194	723.708	723.782	724.764	724.66	724.946	724.984	725.656	725.471	724.861	720.246	713.346	707.035	721.606	754.345
182	1	0.95	812.646	1043.03	1098.68	1097.71	1075.68	998.919	901.681	814.629	740.927	669.022	597.535	529.345	458.255	452.533	497.224	563.375	545.15	497.196	426.882	358.281	322.771	291.764	316.502	568.5	947.787	1061.43	1102.64	1102.69	1101.67	1077.52	1029.03	948.79	885.077	828.283	837.832	1070.34	1088.3	1100.82	1101.94	1099.43	1097.69	1086.67	1019.72	940.722	880.072	821.007	902.612
7311	0.05	7	105.907	109.395	116.346	126.556	128.975	130.275	122.746	108.559	104.533	104.567	104.581	104.601	104.6	104.595	104.594	104.61	104.583	104.443	104.417	104.478	104.53	104.588	104.552	104.594	104.638	105.365	104.67	104.487	106.259	112.828	108.469	104.422	104.428	104.488	104.579	104.559	104.486	106.457	105.21	112.196	108.666	104.527	104.61	104.51	105.396	106.944	108.631
1755	0.25	2	109.582	119.873	152.038	181.589	179.554	173.548	164.171	151.316	137.066	121.787	107.229	100.407	100.431	132.227	145.748	149.092	150.839	192.673	195.926	187.455	178.909	168.573	160.093	171.268	219.319	270.398	297.055	307.275	305.295	287.103	263.107	238.833	241.818	217.142	190.899	190.355	201.593	215.504	203.367	212.963	276.234	329.076	320.32	304.937	287.182	270.699	268.736
1152	0.2	5	0	0	0	0	0	0	0	0	0	0	0	0	0	0	0	0	0	0	0	0	0	0	0	0	0	0	0	0	0	0	0	0	0	0	0	0	0	0	0	0	0	0	0	0	0	0	0
1192	0.05	3	90.59	96.0716	96.9413	101.102	104.678	103.273	97.1635	91.1156	91.1719	92.1422	91.3506	90.8423	91.0969	91.2358	90.5526	91.1533	95.1535	103.344	101.392	95.6974	93.4091	95.6666	96.8478	92.9583	92.3063	95.0071	92.662	92.1813	93.6642	92.8265	91.955	91.9368	91.8634	93.7917	94.4435	106.706	114.407	121.048	125.502	125.288	124.238	122.835	118.029	109.771	100.27	92.6034	93.0187
541	0.05	2	91.0775	91.0246	91.081	91.053	131.866	159.044	120.863	90.8896	90.5583	90.8859	90.7493	91.083	91.1893	91.3455	91.3245	90.3682	94.3637	90.4718	91.366	91.8254	91.843	93.3896	95.011	96.4857	99.9383	101.395	102.362	104.336	162.381	206.365	177.832	120.823	90.6113	90.4945	90.9395	90.8636	90.879	91.0257	90.9993	90.8542	98.4921	116.833	92.1415	90.8593	91.0848	91.2066	91.3854
1822	0.35	0.5	383.164	398.691	428.577	461.3	457.704	444.477	424.014	400.931	383.329	375.759	366.704	364.279	355.948	364.009	368.484	368.784	357.542	353.672	336.826	323.663	314.494	299.816	293.95	298.378	317.827	350.332	371.511	373.147	362.239	347.067	329.569	327.818	320.646	310.675	306.681	333.099	349.653	365.455	373.706	390.149	396.526	393.276	376.056	356.742	338.535	325.178	320.94
972	0.05	8	158.162	155.735	155.486	171.78	169.843	165.741	160.537	156.185	151.367	146.015	141.075	136.096	130.592	125.237	120.068	114.896	112.137	110.26	107.678	105.269	102.083	99.1015	96.7063	93.5631	90.782	90.416	90.4293	90.0472	90.4413	90.121	90.5556	90.374	90.4689	90.592	90.6114	90.6423	90.6466	90.4868	90.4946	96.956	98.0219	97.3448	95.1475	92.032	90.4882	90.6961	90.6436
613	0.05	0.85	70.8051	70.6122	70.5875	62.5242	55.3867	64.6621	85.9979	87.3285	87.5038	94.3435	117.912	144.313	166.878	184.563	208.264	271.823	343.303	350.361	158.302	80.1242	74.6776	69.0453	64.5047	59.4401	55.7826	72.1223	78.3367	79.749	75.0026	79.7555	87.7846	88.2243	88.2579	88.2621	88.5384	98.9364	110.82	126.397	190.077	271.549	389.771	519.807	256.07	74.4524	58.1032	39.2089	46.5238
1086	0.75	1	433.418	430.611	427.653	424.261	419.709	411.878	400.252	388.29	379.187	372.451	368.113	365.301	362.269	359.295	356.524	353.201	348.651	341.473	332.352	319.555	304.78	296.622	293.354	290.903	288.466	286.215	283.976	281.068	275.309	265.699	250.258	228.346	215.657	210.751	208.699	207.363	206.419	213.281	223.9	233.928	230.909	221.858	210.238	199.48	190.107	183.532	181.976
1295	0.15	10	563.697	564.386	561.533	558.913	555.48	549.809	539.815	530.953	524.56	523.258	521.755	521.052	518.981	518.515	515.117	510.159	509.847	511.457	508.581	499.962	498.955	496.902	501.872	501.602	500.479	498.974	497.728	497.388	500.428	495.858	488.303	481.796	474.944	474.414	476.864	485.009	488.083	491.612	494.588	494.017	492.528	493.294	489.719	487.604	486.021	482.757	481.291
1139	0.15	9	153.552	150.92	146.949	141.342	136.272	130.559	122.309	115.058	111.047	126.357	128.565	139.199	139.195	137.932	151.543	152.408	152.437	153.434	148.666	142.652	137.883	159.99	179.357	179.012	176.449	178.227	179.693	178.195	191.639	217.831	231.901	226.812	220.509	214.618	208.672	205.426	204.683	204.797	202.592	199.731	194.215	188.837	180.477	171.734	163.319	160.131	158.474
1862	0.6	1	417.56	432.496	471.567	518.735	512.994	502.642	484.8	463.852	443.268	428.226	414.269	400.806	384.519	394.046	399.084	395.216	379.757	371.765	355.864	340.136	324.993	308.324	293.828	280.766	302.694	349.817	376.057	376.333	379.362	368.758	354.838	342.521	327.549	314.831	305.171	329.539	351.485	371.618	385.134	410.246	412.373	406.138	391.916	374.771	360.571	345.896	337.334
629	0.05	0.35	42.9315	56.1826	67.0503	38.5962	31.1398	1.82343	33.5676	48.6622	47.8322	48.8035	48.4483	47.3861	47.7538	47.0282	45.419	47.5848	45.3258	47.0877	48.2475	52.8954	50.2116	44.4991	57.3151	50.0279	41.7846	59.4973	50.5493	47.4925	49.9508	50.8564	54.8382	53.5418	52.0373	57.9192	55.2292	52.7035	52.3987	51.0819	52.0923	54.7672	53.472	56.1105	54.6982	59.0006	55.6869	55.2134	55.6371
1000	0.65	3	390.617	394.338	401.194	406.013	402.03	395.763	387.391	378.019	369.461	362.457	359.257	360.948	357.469	358.715	361.098	356.426	362.96	384.191	392.275	388.795	383.569	379.453	385.37	389.553	394.277	414.514	421.484	420.813	416.806	420.553	415.131	408.58	404.953	398.078	393.028	428.267	430.958	429.813	425.514	451.925	463.117	458.861	450.864	440.886	432.235	434.235	458.333
7306	1	10	765.521	770.348	779.303	788.078	786.665	781.972	774.513	766.458	758.867	759.781	760.4	763.101	763.608	768.952	770.352	770.207	765.348	763.113	758.519	752.32	749.172	744.987	745.089	748.661	758.254	766.012	769.66	772.146	769.276	761.928	753.595	751.142	746.773	743.492	743.557	757.35	765.957	774.087	778.649	787.596	788.363	785.44	778.177	768.337	761.872	757.717	758.765
991	0.1	1	22.3985	63.0174	70.2626	70.8641	70.5425	70.2718	80.1067	91.7665	99.5974	104.877	109.261	114.743	118.233	119.484	125.041	132.081	143.01	177.601	139.295	75.3239	74.6905	74.6201	86.7641	80.426	74.4017	85.9967	74.7478	74.4226	74.776	85.9604	97.1928	129.741	152.538	167.785	178.64	186.785	192.559	207.045	236.443	432.536	522.879	583.632	418.507	105.841	71.0755	60.4429	60.9461
7317	0.15	4	218.408	220.619	229.753	236.512	233.511	228.82	222.918	214.839	207.926	202.306	197.369	194.182	189.739	190.831	189.002	187.193	183.023	180.793	176.246	171.502	167.437	162.523	160.457	160.082	168.177	178.371	181.889	182.193	179.366	174.321	169.435	168.543	166.222	162.86	160.204	169.15	174.283	179.863	179.835	187.67	195.151	200.011	196.53	190.813	186.116	182.816	182.764
998	0.45	1	272.992	286.345	264.36	352.153	521.316	700.498	585.481	438.671	356.702	329.075	311.921	290.07	261.375	229.076	202.515	174.949	114.603	71.913	72.5817	68.2259	63.1029	70.1836	73.9146	74.0324	74.2472	78.7682	89.2027	92.3891	77.9035	73.1642	73.1987	73.0806	78.6528	104.485	139.369	172.347	203.742	220.117	257.139	356.451	439.81	449.883	367.597	242.809	167.382	141.411	136.397
1716	0.2	2	99.2664	102.237	114.499	127.202	125.441	121.889	118.605	112.345	106.889	102.661	100.542	100.704	95.8752	100.924	101.624	99.0892	107.73	127.65	125.692	123.176	119.324	113.689	111.254	108.963	121.156	156.355	174.264	176.878	172.719	172.25	164.832	153.063	146.666	141.02	133.404	173.298	195.414	201.197	200.388	210.992	252.935	257.818	241.701	220.895	203.058	200.663	217.03
1896	0.05	2	72.686	78.1055	87.9377	100.746	98.4802	95.5489	85.618	76.5453	70.509	72.1727	72.0035	71.3054	71.4665	79.4647	81.756	79.7564	74.1659	73.565	72.5948	72.9557	72.1511	73.3563	72.5817	72.7112	79.8045	91.7935	94.2625	95.3669	96.5259	91.3464	85.6668	82.2456	73.6437	75.1269	71.3562	78.6208	84.8315	84.9394	86.5394	93.9809	91.7782	87.3105	79.4708	73.1281	73.655	71.3421	76.8316
1883	0.05	2	71.3148	71.3859	73.7836	71.2521	76.5048	85.2054	90.8693	92.3782	92.7537	99.2188	103.844	109.749	113.823	140.399	166.804	173.262	149.105	103.501	72.5625	71.4488	71.339	71.0862	70.8732	71.5737	79.361	77.7608	70.9406	72.0783	72.4552	71.6623	71.8778	72.0353	72.1149	72.5078	72.3523	73.4842	91.999	103.949	115.016	138.46	125.075	91.3504	71.6572	71.5772	71.7669	71.7875	72.1777
1285	0.05	9	69.025	69.0151	69.0048	69.0126	71.8294	70.2136	69.2397	69.6326	70.5331	72.1203	73.4612	77.1832	79.6945	83.0827	86.9862	90.0491	92.6606	110.595	115.127	106.779	99.4701	92.2284	85.1367	77.4487	70.1982	68.9736	69.0023	68.954	69.1082	68.9504	69.456	70.0859	70.7416	71.5349	72.8295	74.4719	76.2659	83.4467	91.4694	96.9576	99.627	102.528	99.5618	92.516	85.5121	78.6532	71.7336
1266	0.45	6	328.026	329.061	327.559	325.916	325.926	323.955	317.962	311.796	306.168	302.226	298.531	295.512	291.185	287.685	284.111	279.135	275.471	273.719	270.359	264.599	262.515	260.749	259.44	256.839	254.155	252.111	249.834	248.196	248.054	245.606	242.261	237.924	233.486	230.405	229.338	235.082	237.613	249.464	265.622	271.234	275.37	281.182	278.229	276.052	274.062	271.286	268.751
1176	0.05	9	117.866	114.394	109.929	105.221	102.758	99.6639	93.5797	88.6836	86.2833	96.922	97.1371	101.865	99.7214	96.7957	96.0997	93.9875	92.4068	91.3361	87.5199	83.2406	80.5628	82.33	82.9587	80.1305	77.0053	75.0213	73.1279	70.2527	73.1039	78.833	81.6687	79.1309	76.1602	73.7572	71.6212	70.6158	68.647	69.2272	68.399	68.3488	68.543	69.7139	68.0646	67.9685	68.2959	69.5728	71.9422
924	0.65	0.05	311.951	302.331	313.272	334.154	324.141	327.553	316.914	300.985	301.769	289.12	285.895	305.184	320.639	328.757	354.186	356.005	354.143	345.988	383.697	444.4	430.016	413.504	401.744	394.486	379.893	400.529	513.14	568.764	593.536	629.902	640.739	647.716	631.514	609.31	602.695	637.545	632.187	640.287	652.452	678.088	663.512	635.67	596.44	549.858	506.944	466.136	465.829
758	0.05	4	122.505	123.932	123.839	119.168	104.622	96.3746	95.2572	101.559	116.661	118.373	120.032	119.691	115.433	111.731	106.804	109.898	110.209	120.714	134.58	134.102	139.771	161.44	161.571	159.389	160.766	158.681	157.962	164.072	161.538	154.349	152.043	144.761	133.556	148.224	153.405	146.852	142.947	134.835	127.777	117.904	104.259	106.165	121.386	117.53	118.423	129.309	134.539
1257	1	10	0	0	0	0	0	0	0	0	0	0	0	0	0	0	0	0	0	0	0	0	0	0	0	0	0	0	0	0	0	0	0	0	0	0	0	0	0	0	0	0	0	0	0	0	0	0	0
895	1	0.5	565.048	567.294	568.487	570.394	567.793	564.181	555.702	548.898	547.688	545.799	547.087	547.547	547.611	548.226	547.395	546.449	543.291	539.499	534.417	529.633	525.773	524.048	524.217	527.332	529.326	530.503	530.26	530.332	530.141	533.249	528.113	519.954	516.153	520.641	524.77	528.409	533.524	535.543	538.437	546.018	549.275	549.257	548.662	541.877	536.337	535.917	539.38
1317	0.3	7	370.661	370.504	364.147	357.454	351.059	343.982	331.427	335.613	338.044	334.385	330.367	330.336	328.611	327.681	324.597	317.979	318.081	325.721	325.717	317.388	316.059	311.908	315.722	312.678	308.954	306.444	305.932	300.597	298.287	290.738	279.038	269.4	261.169	256.446	256.927	255.47	252.938	252.56	251.514	247.434	239.99	234.621	236.112	232.657	227.82	230.129	231.393
1242	0.25	7	160.044	155.813	150.754	144.65	135.78	117.777	83.7712	63.5784	69.0796	151.691	157.165	160.507	163.826	165.97	166.593	165.685	160.548	143.142	115.949	92.4217	84.484	80.7196	77.6922	75.2664	72.8873	71.8269	70.4204	68.0352	64.67	63.3737	63.1463	62.3331	61.1545	60.8646	60.3087	62.3413	77.7109	100.222	107.849	108.351	103.83	87.2535	63.6849	61.4216	59.7188	60.4574	63.4656
107	0.85	3	354.424	360.405	366.069	369.112	368.409	365.316	357.187	346.405	338.236	333.247	330.356	330.557	331.75	335.905	339.706	340.641	338.94	334.974	326.181	315.043	306.475	302.464	301.594	318.879	338.005	351.758	365.623	371.18	370.694	366.376	358.677	348.95	341.902	338.419	336.233	343.572	354.14	368.598	381.95	392.905	393.046	389.411	382.752	374.014	367.378	363.132	361.454
1841	1	10	579.342	581.173	582.97	583.08	582.871	582.039	580.708	579.216	578.041	578.272	578.241	578.515	578.341	579.65	580.335	580.862	579.964	579.913	578.46	577.539	577.122	576.32	576.495	577.212	579.632	582.844	583.071	583.003	582.401	581.516	580.348	580.142	579.38	579.151	579.565	582.249	583.164	583.145	583.106	583.113	582.895	582.396	581.329	579.972	579.17	578.724	579.077
907	0.05	0.7	49.7417	51.3888	49.2329	50.5497	51.1069	51.4281	59.4526	66.1389	73.8136	82.1663	89.4964	95.9086	101.205	106.153	114.932	123.528	131.973	137.462	86.917	53.6891	53.798	53.7015	53.6649	53.6731	53.9613	52.2323	53.8705	48.81	48.7064	49.1296	51.7706	53.4308	53.694	53.9718	53.8964	54.0151	52.7215	55.5532	67.7701	120.048	138.976	133.161	86.4394	52.3546	52.7577	51.3532	51.2585
80	0.65	2	513.877	515.697	518.329	519.123	516.829	514.149	509.786	504.498	500.169	496.492	495.494	499.409	501.591	502.474	503.939	505.151	503.607	502.917	499.44	494.321	489.892	488.24	487.462	495.656	500.674	506.628	513.076	515.564	514.595	510.947	507.076	502.096	498.252	496.241	496.635	502.018	508.853	513.7	519.364	522.838	521.12	518.628	516.573	511.925	508.061	503.972	504.995
1236	0.05	7	53.2266	53.2316	53.198	53.2079	53.1893	53.2063	53.2037	53.2557	53.2355	53.3488	53.3111	53.2254	53.1757	53.168	53.1586	53.1349	53.1366	53.0907	53.2987	53.3255	53.3582	64.1147	76.4441	82.2004	87.3113	92.2836	97.7708	103.229	108.175	112.747	104.774	79.9569	58.2652	52.9417	52.9556	52.9731	52.9715	52.9766	52.977	52.9482	52.9121	52.9106	53.2801	53.3284	53.3468	53.6931	54.0493
981	0.05	3	50.6807	51.9493	51.0535	66.4453	68.0997	66.3699	63.3343	60.5106	57.6974	54.7807	52.1149	51.4135	51.4601	51.4685	51.5069	51.3593	52.3383	52.3157	52.9952	53.0295	53.04	53.0777	53.1264	53.0669	53.0202	52.9584	52.8204	52.9717	52.8732	52.9076	54.5076	56.371	58.0997	59.7079	61.2258	62.895	64.5692	66.8593	69.0053	73.2313	75.899	78.1322	75.6757	69.2188	63.1522	57.4314	52.7102
1093	0.15	0.8	52.1049	52.067	51.9838	52.0845	52.3504	52.0743	52.049	52.1245	52.2247	52.088	52.0837	52.2131	52.0538	55.2746	67.4125	66.1616	70.7937	105.254	93.5294	66.4042	51.6338	51.7453	51.691	51.7442	56.8134	177.34	208.14	192.913	175.989	173.964	93.4145	50.3968	50.3474	50.4603	50.306	67.1995	58.1842	50.4221	50.8153	50.271	96.7603	79.8121	55.0965	51.6115	51.6463	51.6449	51.7331
1709	0.5	0.75	61.0802	57.9263	86.1388	92.8456	61.4724	63.276	82.9065	98.0109	106.725	108.887	109.198	113.309	117.687	151.449	208.962	262.794	309.435	371.335	352.204	309.374	259.594	208.086	159.745	121.125	113.724	188.774	247.528	271.449	238.339	231.926	230.786	213.818	186.908	154.341	123.723	111.36	100.265	117.529	147.593	194.526	248.222	267.54	248.227	218.302	179.681	137.833	98.7138
1017	0.05	2	50.1768	50.7475	50.406	50.015	50.1039	50.9266	51.4629	51.9691	52.3219	52.4691	52.5875	52.7359	52.4211	54.124	56.5664	57.8589	60.779	60.562	50.1832	50.3408	50.4588	50.5321	50.4377	50.2537	51.2932	63.3105	70.4106	58.8573	50.2471	51.4897	52.9354	54.446	60.7488	64.2411	67.5841	123.1	161.856	169.196	175.719	191.889	217.638	187.156	118.565	57.5482	49.4265	49.5389	49.1966
1194	0.15	8	128.142	126.356	124.335	122.207	120.151	116.328	110.33	104.218	99.5425	97.8258	96.2082	94.9491	93.4651	91.8481	90.6191	89.2364	87.9369	86.3318	82.8808	78.7459	76.1747	80.4395	87.1546	87.7669	87.719	88.5091	88.8798	88.8722	91.9246	95.9429	96.5724	94.5021	91.8648	90.0904	89.0486	88.215	86.9759	85.7965	84.6909	83.4103	82.0399	80.554	77.7927	74.9929	72.7813	71.2521	70.0309
[truncated: 433 more columns]

## Sheet: Outflow(WG inflow-With Demand)
grand_id	a1	a2	a3	1980-01	1980-02	1980-03	1980-04	1980-05	1980-06	1980-07	1980-08	1980-09	1980-10	1980-11	1980-12	1981-01	1981-02	1981-03	1981-04	1981-05	1981-06	1981-07	1981-08	1981-09	1981-10	1981-11	1981-12	1982-01	1982-02	1982-03	1982-04	1982-05	1982-06	1982-07	1982-08	1982-09	1982-10	1982-11	1982-12	1983-01	1983-02	1983-03	1983-04	1983-05	1983-06	1983-07	1983-08	1983-09	1983-10
610	1	0.5	4	2123.73	4583.12	3663.81	2124	3935.16	4905.99	2104.41	1565.4	1501.39	1547.37	1490.21	1532.65	1526.29	1376.34	1801.68	1664.63	1591.04	1536.83	1391.41	1165.84	1116.61	1152.36	1113.37	1149.88	1189.75	1435.57	1606.63	1374.74	1247.53	1193.6	1176.61	1077.49	1042.39	1080.35	1051.33	1382.97	1370.42	1484.92	2034.78	1814.84	1324.05	1163.03	1299.86	1460.46	1371.08	1436.15
1294	0.35	0.1	6	53.1169	49.9589	51.7549	54.3063	91.2419	55.1847	47.9372	27.9041	63.7045	77.4411	99.9698	113.506	105.934	100.58	264.98	198.129	185.032	513.507	203.956	183.727	164.186	197.212	190.974	169.31	163.3	152.805	154.907	97.9871	115.799	90.044	87.2161	81.8709	74.3513	74.1154	71.1495	87.1303	106.523	179.939	216.12	113.566	116.439	98.3661	85.2379	76.2989	66.7947	65.3488
1247	0.25	0.5	4	66.614	77.8869	67.3875	62.4108	98.087	65.1545	45.9399	39.1747	193.909	260.281	173.692	283.074	105.854	86.3606	184.5	111.819	98.1651	90.176	96.2007	93.0401	85.891	831.339	166.606	158.834	143.955	166.287	162.264	122.206	421.431	315.748	200.179	148.291	124.121	114.54	102.183	110.214	121.037	150.215	148.554	136.743	113.228	122.279	89.9606	79.7336	71.3698	71.1607
1186	0.15	0.5	7	248.933	177.803	104.017	155.21	119.851	63.4391	50.3639	38.9804	31.6275	33.3383	32.584	34.787	33.4375	30.4794	38.3905	37.3514	58.2163	150.598	56.4125	42.8885	36.5998	36.7871	45.3953	43.8176	44.6665	97.7204	60.2785	48.6213	45.9284	37.171	29.9432	23.6769	18.8754	19.0629	20.8235	341.208	57.3698	247.851	160.78	60.0537	55.5697	47.9217	37.364	27.6524	21.9177	21.0234
355	0.45	0.1	1	107.756	91.9905	126.588	413.061	727.867	215.638	170.123	115.191	63.6295	53.5553	126.478	135.015	108.388	113.225	157.388	366.255	1131.98	243.443	165.797	142.667	88.1366	34.3888	52.5328	112.831	98.5132	103.456	138.143	237.548	467.715	343.235	157.833	139.3	63.6658	43.4032	142.089	160.029	177.473	187.602	311.337	850.019	1500.75	535.933	161.244	132.975	125.041	129.902
1302	0.1	0.5	10	22.7577	19.9125	21.3208	18.0431	20.4922	15.4899	14.1368	17.462	30.1404	37.6344	41.8871	39.0429	40.5061	35.2549	73.6319	47.3104	40.1024	244.739	36.5764	28.9445	25.2029	28.3306	26.8131	24.1969	21.8744	21.5914	20.458	17.1988	22.3556	14.7393	15.9564	16.4364	15.5476	16.1287	16.4236	20.2857	26.5182	41.8877	57.353	22.6341	19.3949	17.8377	17.528	17.5228	15.942	16.8228
1231	0.25	0.5	6	139.347	95.8758	68.1104	59.3919	55.1936	40.2942	30.6713	23.5569	18.9655	19.2097	18.428	19.7275	19.2342	17.4319	20.6448	21.2121	45.419	270.456	62.5558	39.7147	31.4916	43.2132	83.9633	61.0427	53.0108	63.6246	57.8548	46.4616	51.4057	42.6377	36.2334	26.8706	20.4347	19.5091	24.58	276.445	73.9142	156.577	91.6215	69.2263	57.0964	51.0906	41.2024	31.5387	24.9868	22.4291
1140	0.05	0.1	0.05	0.452316	0.408543	0.452316	0.420242	0.432655	0.316198	5.77681	3.69368	1.9419	0.956431	1.20325	2.90014	0.957331	0.864686	0.957331	0.92624	0.92885	1.0366	0.149569	0.364211	0.401125	0.449277	0.438137	0.452741	0.452971	0.264476	0.203106	0.0701374	0.452971	0.412105	7.18428	7.66616	4.32545	1.01253	0.990514	1.02353	2.5086	9.2422	10.2324	3.96094	1.01293	0.862172	0.0324564	0.249862	0.307416	0.382194
1296	0.05	0.1	6	34.7496	26.1379	16.7866	12.8789	21.1405	9.85257	5.92312	4.92995	6.57245	5.71833	4.68751	3.91691	5.7187	9.8416	8.9449	6.6471	3.263	22.5455	5.4011	4.24931	3.58573	9.39511	13.7539	5.5999	5.46059	5.05881	5.47008	5.56794	72.9534	60.2428	55.7399	7.78893	5.80929	5.97568	7.56074	45.7404	25.5032	64.5837	58.6895	31.8748	23.4979	6.62505	5.34471	4.42153	3.66949	3.49159
1277	0.05	0.5	5	1.06089	0.958223	1.06089	1.02676	1.07414	1.1544	36.4472	7.57162	2.96567	2.86065	2.73921	8.58285	6.94345	9.13645	17.6392	14.2712	7.83836	24.9279	26.3914	4.52407	4.7537	3.97724	2.40139	2.48144	2.48107	2.9615	3.20186	4.59598	11.7549	4.26446	1.06215	1.12818	1.03072	1.06184	1.02713	1.06136	1.06132	0.958608	1.06133	1.03939	1.08187	1.11705	34.0915	25.4053	3.029	3.05925
1280	0.75	0.1	7	21.9267	21.7304	21.8091	17.8737	34.2441	10.3878	1.72008	1.70228	454.682	238.391	95.9463	163.288	141.832	100.596	165.865	98.817	81.8044	62.8672	47.8422	34.351	37.9878	142.187	58.7336	54.4051	49.6796	52.2009	46.8334	39.0189	52.8992	47.916	38.6174	27.1546	27.6996	28.1222	30.3612	30.3661	35.3859	47.1373	53.0647	35.7271	29.0652	29.5553	16.7475	14.3487	12.8943	18.1165
182	0.95	0.1	1	305.099	465.283	221.355	127.743	108.038	97.5048	97.9525	94.3762	85.655	86.1305	82.6565	85.6259	87.7884	120.233	142.346	110.717	61.2966	55.5619	54.4753	50.792	45.5335	45.8239	111.662	203.702	125.362	322.407	408.012	488.086	161.209	122.815	107.637	98.4213	90.2906	91.6471	199.11	365.634	393.83	510.624	695.356	290.288	157.881	124.583	107.499	100.595	92.3887	92.6902
1152	0.25	0.5	5	0	0	0	0	0	0	0	0	0	0	0	0	0	0	0	0	0	0	0	0	0	0	0	0	0	0	0	0	0	0	0	0	0	0	0	0	0	0	0	0	0	0	0	0	0	0
1295	1	0.1	10	65.0127	64.8548	38.9894	27.6784	31.1599	17.4538	12.0833	7.84094	6.18993	5.81957	7.71461	12.0805	21.0964	26.953	16.9153	11.8869	21.883	71.0664	27.8798	15.1591	12.8185	15.6052	90.497	25.1446	33.4365	27.0594	33.518	77.971	83.251	28.9003	21.2066	14.946	10.0669	11.7804	116.572	133.946	69.0335	140.697	119.043	30.8983	105.485	24.7418	20.8693	18.407	17.0051	12.8532
629	0.05	0.5	0.4	2077.97	4365.63	3845.41	2142.18	3304.7	4762.25	2174.86	1731.77	1727.78	1785.44	1675.83	1784.8	1784.62	1563.57	1772.47	1635.41	1690.79	1615.41	1707.25	1668.68	1560.94	1612.1	1609.01	1619.83	1644.77	1539.95	1593.95	1534.82	1587.04	1465.15	1595.15	1452.73	1301	1387.07	1302.95	1515.4	1404.02	1303.34	1569.54	1290.95	1285.9	1222.19	1327.83	1587.4	1376.98	1461.58
1266	0.7	0.1	5	13.8856	18.5885	15.9633	14.8836	20.4696	14.176	13.0838	11.8255	10.1564	9.62319	8.6699	8.47819	8.10003	7.2267	8.53735	8.60355	9.03398	9.08372	10.5789	10.0574	8.97266	8.80312	8.87442	9.30253	9.29137	8.85648	10.1627	10.3354	13.6253	11.504	10.8395	9.58542	8.2049	7.72376	7.08847	24.5231	16.6701	52.2656	31.4843	16.676	32.1039	14.462	12.9224	12.0215	10.6169	9.97258
1176	0.05	0.5	9	4.75705	4.98017	4.6367	4.77824	12.6168	23.1455	36.8056	31.5261	260.552	56.0105	185.674	123.95	24.043	22.6816	52.047	26.937	25.8773	32.0824	38.1377	27.6099	16.9739	54.2417	16.3046	15.7502	17.3069	23.0506	19.2524	12.6303	134.155	152.056	69.1696	55.6445	36.1521	22.7938	14.6011	12.7464	38.6962	79.7289	29.771	20.0946	21.7825	34.9285	39.6968	31.8734	14.644	125.279
758	0.05	0.5	4	90.4857	81.5703	88.8607	82.4858	79.2726	64.1157	63.7502	62.8108	61.8651	64.6814	63.8779	67.2034	67.6112	61.1912	67.1329	64.9384	66.1695	40.4346	42.015	41.4247	41.2502	49.0686	50.5811	54.4274	56.7267	51.2423	56.1715	55.0254	55.5087	73.9924	76.0259	73.738	69.0807	77.2679	79.2831	82.7992	83.8266	74.0968	80.0719	74.1707	71.0453	60.8488	62.7901	59.6604	56.7862	61.1394
1242	0.05	0.1	7	8.96716	8.21906	8.13872	4.36439	5.53733	9.90659	10.738	0.96633	312.785	173.43	44.3082	47.7368	46.0343	37.5509	35.7682	31.0141	19.429	12.3723	13.8221	26.3545	50.1094	16.1688	13.9339	13.2902	15.2102	10.3532	8.50194	3.7555	2.82701	0.479975	0.537317	0.498956	0.351011	0.146677	0.154649	5.64852	148.822	97.7874	23.6518	33.3016	4.95936	5.61747	1.75159	0.580083	0.360014	3.31842
1236	0.05	0.5	0.05	0.811782	0.733222	0.811782	0.814554	0.841694	1.05465	3.1291	2.13685	1.64364	1.62356	1.57119	3.03764	5.86822	4.76793	9.16909	9.18916	7.6025	7.47318	1.08839	1.01017	0.787623	0.81212	0.785922	0.81212	0.812098	0.733508	0.812098	0.794309	0.820679	0.892226	68.9442	57.7605	8.75167	6.82504	6.65441	5.2894	5.28948	6.31325	8.3608	8.44332	10.7265	7.95467	0.954696	1.01168	0.8398	0.81211
1194	0.25	0.5	9	12.5414	16.2131	16.9532	14.4563	13.3663	11.5278	9.44738	7.87607	6.71549	12.7095	11.1375	13.9812	12.6794	9.97503	12.5417	12.3142	11.8086	11.0232	9.59067	8.02525	6.76373	129.587	33.8445	27.0786	22.7926	27.6079	25.443	20.3257	80.3706	44.5759	28.5564	22.2799	16.9147	14.2311	11.6351	10.7852	10.2311	9.52204	11.2474	11.4113	10.7791	9.99633	8.67052	7.2659	5.9429	5.40684
[truncated: 434 more columns]

## Sheet: Storage(WG inflow-With Demand)
grand_id	a1	a2	a3	1980-01	1980-02	1980-03	1980-04	1980-05	1980-06	1980-07	1980-08	1980-09	1980-10	1980-11	1980-12	1981-01	1981-02	1981-03	1981-04	1981-05	1981-06	1981-07	1981-08	1981-09	1981-10	1981-11	1981-12	1982-01	1982-02	1982-03	1982-04	1982-05	1982-06	1982-07	1982-08	1982-09	1982-10	1982-11	1982-12	1983-01	1983-02	1983-03	1983-04	1983-05	1983-06	1983-07	1983-08	1983-09	1983-10
610	1	0.5	4	36665	36700	36700	36700	36699.9	36700	36688.5	36613.5	36573.7	36569.1	36585	36609.3	36627.1	36638.3	36674.4	36686.6	36565.2	36375.2	36140.2	35820.4	35547.1	35306.3	35086.3	34878.2	34677.1	34595.6	34665.5	34642.2	34335.4	33938.6	33533.5	33177.1	32908.3	32673.2	32469.3	32365.4	32372.7	32467.9	32740.5	33063.5	32983.8	32655.1	32316.4	32196.9	32188.4	32206.8
1294	0.35	0.1	6	1896.32	1871.98	1846.27	1820.54	1796.35	1771.32	1742.39	1713.98	1689.52	1671.15	1652.22	1640.92	1625.4	1612.4	1607.65	1607.74	1602.6	1623.72	1638.25	1630.55	1624.25	1619.66	1619.99	1615.1	1608.17	1602.32	1595.4	1584.52	1572.69	1557.67	1540.08	1521.21	1503.49	1487.6	1472.61	1459.15	1446.61	1440.93	1441.45	1439.5	1427.01	1416.2	1402.1	1386.91	1371.16	1356.89
1247	0.25	0.5	4	746.491	732.603	717.31	699.747	685.867	670.085	643.973	616.247	592.658	642.288	639.25	669.227	675.9	669.837	673.952	673.86	669.651	663.528	652.088	637.749	625.899	685.602	768.545	774.854	776.398	784.832	791.887	793.18	815.115	865.24	889.395	878.614	862.58	847.05	833.437	820.596	807.682	801.354	793.825	786.983	773.755	760.518	742.525	723.128	704.863	688.036
1186	0.15	0.5	7	574.102	590.155	582.811	582.021	581.972	570.478	552.212	531.289	511.773	499.373	487.134	475.099	459.471	445.666	433.084	419.553	414.57	428.054	421.811	409.807	401.605	395.921	393.922	385.936	377.297	377.288	373.194	366.481	362.861	356.93	348.07	336.69	322.94	314.186	309.617	339.99	348.062	360.934	377.625	381.095	376.587	372.771	364.628	352.649	339.995	328.857
355	0.45	0.1	1	1443.88	1486.62	1539.35	1656.43	1760.6	1757.51	1639.07	1440.89	1332.36	1286.65	1312.72	1385.29	1446.09	1491.07	1558.67	1708.42	1760.6	1759.87	1660.4	1458.6	1313.76	1256.2	1242.47	1278.03	1325.4	1365.2	1425.42	1544.01	1726.11	1760.48	1669.68	1472.24	1346.91	1310.18	1351.43	1438.63	1542.63	1638.95	1749.66	1760.6	1760.6	1760.6	1710.37	1591.13	1527.53	1557.79
1302	0.1	0.5	10	573.085	567.838	561.665	555.555	549.253	541.08	529.953	520.709	515.33	512.525	509.587	508.568	505.752	503.476	502.05	499.786	496.601	504.061	505.255	497.843	493.108	490.067	487.693	484.525	480.379	476.265	471.841	466.83	462.491	456.052	448.015	440.884	434.959	431.266	428.758	426.799	424.297	422.758	422.101	420.795	416.792	413.471	409.003	404.55	400.389	397.963
1231	0.25	0.5	6	552.415	554.022	549.764	544.399	537.468	526.266	512.316	500.418	491.048	483.944	477.077	471.188	464.261	457.869	451.611	444.091	438.749	449.64	448.045	440.134	434.461	431.44	431.515	429.704	426.839	425.332	422.769	419.345	416.055	411.322	405.78	398.317	391.181	385.591	382.514	396.21	397.893	399.264	404.64	403.487	400.691	398.557	394.68	389.328	384.108	378.72
1140	0.05	0.1	0.05	133.349	133.776	133.379	132.741	133.579	135.42	133.117	128.589	127.677	127.767	127.565	128.096	127.165	126.448	127.09	126.741	127.017	127.885	128.208	129.063	129.509	129.687	129.487	129.039	128.527	128.332	128.302	128.08	130.707	136.989	141.554	134.994	128.647	127.104	126.171	126.069	127.307	139.367	134.46	128.339	127.266	127.486	127.864	128.311	128.318	182.243
1296	0.05	0.1	6	128.766	126.255	125.999	126.003	126.562	126.263	126.314	126.343	126.354	126.209	126.36	126.437	126.273	126.351	126.328	126.335	128.662	157.247	174.764	178.072	182.121	186.217	212.938	225.034	231.029	236.921	243.018	249.022	240.178	198.262	147.489	125.147	124.839	125.649	126.179	127.756	126.023	129.924	129.089	126.476	143.356	172.609	179.159	184.02	188.373	191.669
1277	0.05	0.5	5	139.579	142.554	144.378	146.574	157.322	166.837	147.388	123.772	121.937	121.64	120.333	124.141	124.63	124.672	125.23	125.204	124.534	137.973	133.518	124.573	124.426	124.479	124.438	124.159	123.363	123.755	124.221	124.636	124.966	124.586	125.142	125.217	125.282	125.366	125.696	127.232	131.025	141.45	155.382	168.603	174.728	178.977	163.588	132.829	123.34	122
1280	0.75	0.1	7	156.78	150.766	143.454	136.566	130.227	121.851	120.719	120.856	133.722	157.636	156.178	160.172	161.202	161.211	163.757	163.108	156.963	149.565	133.624	120.584	121.051	124.127	126.549	123.151	120.521	120.503	120.325	120.553	120.303	120.258	120.06	120.549	120.519	120.562	120.889	120.603	120.685	120.324	120.702	120.313	120.643	120.686	120.518	120.593	120.733	120.812
182	0.95	0.1	1	791.777	1018.4	1098.79	1097.65	1074.18	995.133	895.437	806.861	734.495	666.801	600.303	537.163	471.215	464.9	503.639	561.558	541.254	490.474	418.791	363.992	328.706	299.538	321.827	549.542	892.648	1030.25	1102.64	1102.69	1101.01	1072.69	1016.24	933.221	869.937	816.18	823.471	1046.99	1088.88	1100.88	1101.97	1099.34	1095.83	1075.67	1001.87	919.911	859.434	803.262
1152	0.25	0.5	5	0	0	0	0	0	0	0	0	0	0	0	0	0	0	0	0	0	0	0	0	0	0	0	0	0	0	0	0	0	0	0	0	0	0	0	0	0	0	0	0	0	0	0	0	0	0
1295	1	0.1	10	852.151	856.744	857.714	858.982	859.329	857.049	850.003	844.123	840.78	842.772	844.776	847.667	849.253	852.224	852.176	850.549	853.442	857.895	857.544	851.345	852.948	853.757	861.805	864.714	866.835	868.367	870.064	871.021	871.41	867.562	862.223	857.928	853.372	855.459	860.826	871.202	871.979	871.927	871.796	870.549	869.326	868.442	867.156	867.343	868.151	867.531
629	0.05	0.5	0.4	39.0874	44.509	66.9868	40.9172	36.3872	4.18556	37.7237	35.3016	61.0309	40.6531	46.9256	55.5941	36.7442	56.331	46.4892	45.61	49.11	48.211	46.7834	46.9947	56.3791	49.1215	46.4443	55.1875	44.2199	49.6805	48.8182	50.1469	48.3086	48.8979	52.6227	54.9748	50.6993	58.855	58.0414	46.6133	60.1232	55.0559	53.9665	53.2606	54.4995	56.5189	52.2644	67.2178	51.3062	53.5413
1266	0.7	0.1	5	438.959	442.024	442.104	441.723	443.346	442.671	436.67	430.328	424.5	420.43	416.62	413.445	408.843	404.96	400.959	395.504	391.258	388.825	384.9	378.475	375.861	373.663	372.121	369.455	366.667	364.493	362.102	360.307	360.204	357.689	353.827	348.717	343.453	339.656	338.007	345.579	349.701	366.671	389.707	398.29	404.542	413.031	409.838	407.151	404.595	401.317
1176	0.05	0.5	9	117.517	114.063	109.616	104.925	102.477	99.3815	93.2769	88.3653	85.9677	96.6195	96.8485	101.589	99.4592	96.5461	95.8632	93.7654	92.196	91.1291	87.3048	83.0156	80.3413	82.1195	82.7584	79.9399	76.8245	74.8501	72.9666	70.1017	72.9633	78.6998	81.5319	78.9857	76.0143	73.6173	71.4885	70.49	68.5282	69.1152	68.3324	68.3484	68.931	70.2438	68.3647	68.036	68.2796	69.5784
758	0.05	0.5	4	121.8	123.251	123.187	118.566	104.056	95.8035	94.597	100.8	115.896	117.632	119.302	118.978	114.738	111.058	106.163	109.304	109.665	120.224	133.993	133.343	138.915	160.549	160.697	158.526	159.916	157.845	157.151	163.302	160.82	153.583	151.098	143.582	132.24	146.904	152.111	145.572	141.685	133.6	126.584	116.778	103.234	105.239	120.45	116.499	117.388	128.335
1242	0.05	0.1	7	163.969	161.175	157.548	152.874	144.544	123.806	83.7777	63.1429	68.3765	151.465	158.473	163.379	168.263	171.91	174.042	174.644	169.858	149.687	116.863	88.5979	78.5276	74.9062	73.4555	72.7826	72.1437	72.2661	71.5654	69.8863	65.9978	63.3326	62.8872	61.8328	60.4913	60.2019	59.7367	62.0829	78.2038	101.575	110.116	111.537	107.269	89.1794	63.4556	60.7511	58.8265	59.7976
1236	0.05	0.5	0.05	57.8558	58.8205	59.8104	60.305	60.3928	55.8679	52.6938	52.3179	51.8045	51.6761	51.2005	52.2467	53.1122	53.1243	53.0977	53.1073	53.0633	53.0252	53.3678	53.378	53.8322	72.8322	95.0539	105.665	115.18	124.315	134.393	144.619	153.864	164.129	139.892	74.8368	52.3431	52.6725	52.2925	52.7887	52.6022	52.7145	52.4079	52.4403	52.3574	52.236	53.3214	53.3774	53.3824	54.1569
1194	0.25	0.5	9	190.344	188.479	186.296	183.99	181.736	177.552	170.868	163.995	158.743	156.637	154.723	153.201	151.431	149.561	148.047	146.283	144.559	142.469	138.326	133.429	130.274	133.182	138.099	138.032	137.426	137.594	137.329	136.7	138.631	141.289	140.941	138.207	135.064	132.979	131.778	130.849	129.528	128.261	127.023	125.551	123.946	122.17	119.009	115.788	113.26	111.543
[truncated: 434 more columns]

## Sheet: Outflow(OBS inflow-With Demand)
grand_id	a1	a2	a3	1980-01	1980-02	1980-03	1980-04	1980-05	1980-06	1980-07	1980-08	1980-09	1980-10	1980-11	1980-12	1981-01	1981-02	1981-03	1981-04	1981-05	1981-06	1981-07	1981-08	1981-09	1981-10	1981-11	1981-12	1982-01	1982-02	1982-03	1982-04	1982-05	1982-06	1982-07	1982-08	1982-09	1982-10	1982-11	1982-12	1983-01	1983-02	1983-03	1983-04	1983-05	1983-06	1983-07	1983-08	1983-09	1983-10
753	0.95		0.05	1509.97	1363.84	1509.97	1461.26	1509.97	1461.26	1508.86	1508.86	1460.18	1508.86	1460.18	1508.86	1508.86	1362.84	1508.86	1460.18	1508.86	1460.18	1598.47	1598.47	1546.9	1598.47	1546.9	1598.47	1598.47	1443.78	1598.47	1546.9	1598.47	1546.9	1823.09	1865.38	1764.28	1823.09	1764.28	1823.09	1823.09	1646.66	1823.09	1764.28	1823.09	1764.28	1820.53	1820.53	1761.8	1820.53
870	1		0.05	1728.34	1561.08	1728.34	1672.59	1728.34	1672.59	1728.34	1728.34	1672.59	1728.34	1672.59	1728.34	1728.34	1561.08	1728.34	1672.59	1728.34	1672.59	1728.34	1801.24	1743.14	1801.24	1743.14	1801.24	1801.24	1626.93	1801.24	1743.14	1801.24	1743.14	1801.24	2164.39	2094.57	2164.39	2094.57	2164.39	2164.39	1954.93	2164.39	2094.57	2164.39	2094.57	2164.39	1865.28	1805.11	1865.28
597	1		2	929.023	909.206	990.095	1107.82	1935.82	1945.94	1055.13	794	880.304	830.322	855.346	876.685	844.095	754.36	820.125	799.562	926.352	1065.77	675.345	600.367	672.995	748.726	641.092	636.493	619.977	655.541	769.547	833.214	1335.54	1461.84	1007.26	837.242	784.248	846.547	784.677	786.438	754.259	704.669	921.991	950.13	1689.79	2830.84	2190.03	1259.13	939.103	1021.59
307	1		1	480.145	433.679	480.145	464.656	480.145	464.656	466.144	466.144	451.107	466.144	451.107	466.144	466.144	421.034	466.144	451.107	466.144	451.107	524.031	524.031	507.127	524.031	507.127	524.031	524.031	473.319	524.031	507.127	524.031	507.127	558.08	558.08	540.077	558.08	540.077	558.08	558.08	504.072	558.08	540.077	558.08	540.077	535.737	535.737	518.456	535.737
1753	0.3		0.7	6598.2	3997.53	12806	5956.98	4852.04	2830.34	2926.2	2380.15	2353.82	1974.12	2574.57	2069.38	1877.2	3523.53	1951.74	2312.14	1307.39	2912.21	2576.44	2498.33	2138.97	1906.55	1846.3	3650.45	10051.9	8160.82	6066.62	3056.77	2016.4	2059.06	2863.46	3675.04	2809.68	2614.6	3855.59	9963.36	5723.52	6098.94	3990.57	7918.25	8146.28	4062.66	3356.81	3137.24	2039.18	1687.69
297	0.65		0.75	848.436	767.287	702.597	471.779	937.823	884.177	873.018	721.17	694.134	715.934	690.644	715.192	714.952	642.783	713.191	698.981	788.284	762.898	777.211	1098.17	1047.18	1078.81	1041.21	1073.61	1071.57	972.364	1076.41	449.524	1065.12	1136.81	1118.02	739.014	709.456	729.587	700.779	723.912	723.951	653.259	724.816	709.599	777.675	762.126	768.101	922.445	883.377	909.562
1036	1		2	163.324	237.538	404.06	368.199	284.763	401.788	361.972	252.081	173.652	103.795	159.28	108.189	98.6744	145.29	142.876	123.137	181.635	165.409	155.927	184.041	104.211	131.06	139.933	166.187	385.651	839.664	489.146	265.412	210.718	531.082	296.247	288.421	173.035	157.79	301.07	1741.33	362.976	522.169	498.728	840.615	888.099	333.285	488.401	373.221	193.257	130.72
989	0.1		2	66.0373	440.012	812.329	1352.21	259.364	135.288	46.8444	127.095	31.7127	35.5813	19.9646	46.7039	31.3251	34.0329	31.949	47.1832	616.307	2611.79	1064.52	402.13	278.924	585.04	744.031	505.884	572.115	1176.82	1078.88	335.739	1362.04	2201.92	574.187	786.562	254.349	149.487	122.627	1498.32	422.018	599.054	738.701	3590.23	2101.75	793.859	335.078	189.908	192.6	294.487
1026	1		8	77.5058	256.441	332.747	250.962	167.165	215.646	97.4771	116.492	34.1536	26.7967	56.0908	49.4305	22.0345	38.8237	68.4695	95.533	208.163	377.533	224.786	296.782	113.35	115.314	117.835	134.618	324.146	560.656	279.369	243.402	205.834	455.639	184.736	250.154	93.8682	96.2054	159.534	1109.01	162.565	422.011	336.82	686.873	605.738	225.776	351.063	171.583	104.819	133.57
1848	0.15		3	267.125	205.225	595.729	384.875	188.621	158.969	150.102	141.39	146.417	158.245	195.124	109.407	86.0607	153.766	165.578	194.576	87.7264	73.1491	58.6194	32.3933	46.8431	40.7877	33.0731	52.2984	172.168	108.666	105.33	195.89	225.917	225.169	203.914	231.232	204.328	277.671	229.063	761.345	299.082	359.528	339.709	524.937	546.219	202.503	196.778	209.344	194.307	196.046
1869	0.3		0.05	248.819	175.334	330.04	386.766	362.935	351.228	362.935	341.862	56.1964	78.4408	77.2701	36.2935	36.2935	106.539	120.588	87.8069	13.6572	24.6816	25.5043	25.5043	24.6816	25.5043	24.6816	25.5043	25.5043	23.0362	25.5043	24.6816	372.492	360.476	372.492	264.349	90.1189	80.5062	79.3047	372.492	372.492	336.444	372.492	360.476	463.996	449.029	463.996	463.996	449.029	194.579
7313	0.25		2	214.734	257.906	302.327	419.267	830.824	977.991	378.538	155.198	321.58	350.462	379.638	328.033	291.721	262.638	298.682	340.759	1016.15	1302.4	334.529	149.008	148.664	351.798	350.692	306.211	244.941	316.919	353.147	439.173	883.671	1343.95	780.603	245.391	340.409	438.809	425.807	345.46	355.55	306.287	387.228	416.783	607.237	918.606	729.7	299.371	344.079	490.455
1042	0.8		0.05	88.4272	79.8697	88.4272	85.5747	87.873	85.0384	87.873	87.873	85.0384	87.873	85.0384	87.873	87.873	79.3692	87.873	85.0384	70.8437	68.5585	70.8437	70.8437	68.5585	70.8437	68.5585	70.8437	70.8437	63.9879	70.8437	68.5585	79.3281	76.7691	79.3281	79.3281	76.7691	79.3281	76.7691	79.3281	98.5795	101.549	106.354	373.83	339.741	119.828	119.462	119.462	115.609	119.462
884	0.05		2	1865.81	1308.8	1635.74	1557.3	2154.25	2040.64	2421.04	2749.52	2131.61	1930.12	1920.8	1138.8	1407.25	1377.47	1786.84	2524.06	2250.88	1809.59	2192.26	2343.87	1799.5	1500.39	1100.42	1292.69	1482.37	1078.03	1426.77	1734.14	1707.64	1244.45	1977.52	2367.81	2253.08	1751.54	1925.39	2055.19	2253.02	1572.43	1371.34	760.401	968.523	1595.68	1447.47	2755.21	2032.4	2071.36
1144	0.15		0.85	1289.4	1554.84	1140.58	1063.87	1222.29	879.548	597.5	430.422	399.313	1383.3	879.388	1322.7	836.091	832.536	1032.62	807.599	898.787	1927.88	993.379	765.62	630.18	2050.13	1864.95	1292.3	1015.12	2365.54	1498.49	974.833	2363.87	2967.16	1617.95	1094	894.113	846.784	871.575	4148.92	1612.62	1977.59	1836.45	1362.81	1771.39	1203	1108.61	863.722	734.558	717.736
1006	0.05		7	19.0414	75.7128	129.198	117.572	50.4892	27.2266	1.91343	6.02771	4.35936	20.693	8.00897	10.7446	5.22188	13.6005	15.6571	18.5166	67.8715	214.974	66.9949	46.0447	19.5839	60.4256	77.5178	50.0136	108.719	121.947	93.7218	57.5584	98.0258	128.642	38.0239	77.3208	40.8907	20.0442	43.0331	276.16	68.8989	56.4623	44.8009	341.036	201.389	78.2589	75.4768	28.9661	18.6991	145.584
1048	0.3		2	250.909	260.378	406.531	1420.73	1156.27	1036.08	123.356	117.681	37.4514	75.5459	42.9577	74.5802	105.245	61.809	71.6102	59.2556	264.913	356.472	275.066	178.843	150.688	237.157	703.638	168.461	165.901	391.739	485.26	170.247	2317.82	2077.58	936.764	232.9	68.5417	55.3046	69.9902	103.597	177.485	269.111	550.786	1572.01	1242.33	860.901	642.302	84.7647	109.986	481.85
1032	0.65		2	41.6877	118.602	320.778	452.91	101.788	33.6806	14.674	21.2976	20.2308	18.6153	9.26865	15.5601	10.4302	14.5869	18.1161	38.0363	75.811	116.887	84.7327	39.7218	56.7859	59.1958	149.606	52.6649	109.337	192.852	210.203	44.4251	437.122	861.79	194.249	58.5289	24.3031	20.0836	35.4041	152.888	119.072	377.692	283.839	1146.07	495.786	164.349	66.1893	9.45967	11.2194	162.449
355	0.5	0.1	2	146.987	153.016	195.503	172.466	258.944	417.486	354.046	238	257.873	199.64	187.194	177.22	164.29	144.249	157.426	114.351	319.253	593.806	208.117	155.927	136.969	198.09	179.325	179.948	149.665	173.196	223.915	153.797	168.896	462.516	483.569	257.326	266.319	350.66	257.776	244.62	270.235	250.479	233.209	179.288	304.545	657.391	597.698	251.622	240.166	288.721
1101	0.05		5	143.813	85.7829	563.919	529.218	81.8616	104.33	87.5017	36.2229	38.7054	40.2856	130.406	60.7301	37.4382	113.135	70.2601	153.23	63.9422	231.028	92.1259	39.7694	70.3685	41.2219	21.1819	44.4597	124.874	224.824	153.821	182.451	71.2763	70.9729	51.8525	126.91	45.5731	47.1391	35.6542	438.844	467.817	190.39	195.965	319.954	366.96	154.951	90.2409	46.3246	36.0355	38.5354
1023	0.05		4	138.06	165.379	307.961	669.019	177.016	107.025	25.4807	64.1223	23.4089	22.8956	21.9665	36.0455	30.7349	28.2199	39.4144	32.7101	135.607	177.516	122.843	105.473	51.2907	116.073	417.622	97.9797	64.0594	235.686	226.064	87.2677	581.709	939.411	269.428	79.1688	47.4985	32.6425	35.1251	49.0971	54.6115	117.579	338.774	867.636	381.934	417.413	340.272	57.0862	39.5025	74.7677
1864	0.4		1	111.014	84.0236	193.442	153.808	104.814	99.5813	97.2916	95.7259	94.7681	66.7812	68.5747	33.1316	26.66	76.4712	69.3366	62.5497	22.0088	19.7339	19.1531	17.3537	17.094	20.9625	16.6817	17.7375	39.1309	27.9405	22.9572	58.6932	109.743	107.818	105.96	121.967	124.068	128.181	118.649	238.893	132.142	139.072	141.391	170.783	232.01	157.999	167.593	159.053	169.623	161.707
1021	0.05		4	24.1844	19.9348	35.4673	78.209	65.5687	87.7881	7.47156	5.23354	1.25179	1.44253	0.626402	8.81	6.27188	3.70616	11.8558	6.0558	59.7791	40.0672	17.2319	13.4946	54.6548	27.1168	120.732	15.2972	12.0043	32.6874	34.7836	13.0341	185.103	184.563	153.523	17.1481	2.29823	2.3519	8.64958	10.5785	9.80888	20.7836	61.0976	98.9362	62.6695	135.656	24.908	1.50041	18.0409	19.0137
1120	0.05		9	1.9546	3.34779	3.88014	2.46984	15.9625	5.53286	0.0769046	0.059001	1.89431	0.748441	0.866794	1.90541	0.79099	2.22729	3.54478	4.69227	8.38399	18.4878	12.3532	4.69609	5.44893	24.9797	3.63389	1.188	4.73084	4.06696	11.8018	3.90469	125.678	62.3186	34.1983	16.2104	14.6997	1.41628	1.52038	4.82048	6.23139	13.5291	6.98022	6.91429	34.8081	14.0614	0.411502	0.255964	0.0570978	142.018
182	0.9	0.1	0.75	973.622	858.725	586.856	495.562	470.423	270.845	228.646	172.331	183.392	149.458	161.534	197.581	186.591	183.927	268.712	229.677	167.069	114.606	118.871	113.685	114.792	112.522	364.257	637.368	535.631	1055.72	893.059	1343.67	904.098	442.899	257.966	216.531	193.196	215.192	333.209	722.41	615.318	927.706	1488.43	843.967	983.802	899.68	462.286	235.696	204.719	179.623
7311	0.05		4	2.56121	5.47147	73.3483	44.2818	13.7616	2.34125	0.102167	0.165336	0.0943494	0.105634	0.0963327	0.370911	0.0978561	0.290967	1.11733	1.57135	12.2883	15.081	7.52809	2.1765	1.97483	4.80691	14.1826	3.2884	3.34017	11.1702	27.2264	2.11308	84.6951	181.286	27.9601	6.64921	2.30625	2.43211	2.31879	17.0242	6.44952	57.3955	58.0566	141.265	67.4344	12.2716	2.66124	0.102167	0.326657	10.9181
1755	0.5		0.85	102.518	115.507	164.441	89.7137	68.5087	58.2869	56.5619	53.0537	49.0721	49.0312	39.2951	26.6693	37.6243	137.595	79.8782	81.5129	59.587	135.37	51.5264	47.0926	42.9897	42.652	49.5237	98.5074	169.893	128.542	76.5061	78.0911	128.731	113.937	112.598	112.142	148.736	108.754	106.229	189.18	139.507	151.281	124.233	191.228	255.322	53.1253	35.562	29.9847	27.223	34.1874
1192	0.05		5	375.984	449.511	268.868	424.584	400.888	96.4711	49.01	45.3304	49.929	50.8998	68.8717	76.5074	64.1346	81.9193	102.831	82.2722	263.728	502.086	119.342	58.4136	54.6836	110.962	82.7036	69.7881	91.5773	176.098	121.074	104.728	138.683	133.848	98.1265	46.3763	58.3604	67.8504	98.401	482.409	183.971	489.377	379.799	200.386	158.001	101.724	148.088	62.8444	47.1138	49.7337
541	0.15		1	38.2066	31.6262	43.0464	126.842	312.407	423.237	184.385	104.472	66.3784	48.642	38.0762	35.3492	28.3615	27.8492	31.8989	43.7783	70.7372	120.457	73.9152	51.0711	43.7448	38.91	32.9157	32.817	32.4661	28.3456	45.0857	85.4367	194.914	286.641	186.625	149.038	130.272	93.0988	47.8639	35.0666	36.8518	33.6777	53.3126	73.8168	188.534	416.369	252.916	166.481	105.058	84.2816
1716	0.4		2	30.6627	40.6462	77.4893	32.3815	21.4666	15.8118	14.4044	11.9738	10.1744	9.83095	9.758	17.3758	14.8143	48.771	18.8428	16.8721	79.8463	29.967	17.6133	15.2549	12.8294	11.6253	10.7782	24.6682	99.888	110.224	43.382	27.9233	20.5414	20.9821	16.6303	13.5859	12.2637	12.0615	11.8614	209.068	38.5065	39.1299	44.2421	107.567	119.052	43.9365	22.4275	19.7045	17.2661	70.1522
1883	0.2		0.8	63.8736	57.3533	64.8494	82.1976	81.2178	52.8052	50.9167	37.3807	15.36	20.5834	41.5793	39.6985	36.8471	44.1096	52.6389	47.3875	59.2289	86.7928	56.1588	55.773	43.2063	45.942	39.2053	42.4426	48.3861	45.426	52.1282	52.9434	52.1847	41.7875	24.8933	18.9319	12.4877	14.562	14.3669	78.409	49.903	140.592	66.5697	51.6893	88.8236	74.2401	64.1666	48.6779	49.7361	39.4976
895	1		0.45	1426.79	1056.69	1554.84	2105.87	2306.06	2153.43	2595.33	2693.57	2529.97	2649.66	2460.45	1213.8	1033.79	885.675	1696.97	2433.62	2474.05	2315.33	2532.59	2405.5	2457.52	2543.3	1376.04	1070.12	1110.12	902.512	1348.17	2095.56	2195.74	1951.66	2307.93	2383.43	2344.23	2588.31	2858.87	1978.55	1824.89	1495.1	1627.33	1200.32	1866.35	1573.49	2102.94	2644.61	2566.38	2669
1093	0.1		1	28.8212	44.2313	36.9694	75.2911	163.624	24.6699	3.02673	2.52772	3.0278	18.9045	9.44931	38.4977	6.75785	31.9425	63.5898	27.5545	121.722	255.136	123.469	73.8662	8.81002	147.896	49.0093	27.2487	127.332	221.64	121.66	23.9221	269.202	165.983	56.3261	14.3532	4.63439	5.02142	21.6263	261.312	75.5107	105.38	94.5761	128.78	316.217	83.5861	72.0957	6.5901	6.10229	6.36789
1709	0.2		1	170.723	156.052	306.975	261.912	156.065	53.892	118.435	89.5985	32.1945	42.128	95.887	92.2698	63.6813	251.259	201.68	268.154	293.687	323.573	88.0834	130.677	83.7383	124.255	105.073	222.833	249.597	323.046	439.184	165.726	114.694	231.66	87.0325	70.6841	46.8981	72.5442	141.486	185.85	82.5835	154.281	244.445	285.574	208.656	101.557	128.32	31.189	23.8884	71.605
1017	0.1		1	33.4228	53.0598	64.5995	76.0449	38.3689	17.9917	10.599	14.0797	14.8809	13.7958	16.1079	18.132	15.5067	18.8896	19.6219	28.0228	91.1117	90.158	100.345	29.5804	14.891	20.8363	56.9779	32.7394	58.8459	196.877	81.3275	74.7232	46.4999	47.7396	21.6435	97.4624	82.8651	54.0798	41.9611	388.912	81.2872	54.5721	45.4471	167.451	262.372	105.059	91.9117	18.7935	13.5065	26.0179
[truncated: 434 more columns]

## Sheet: Storage(OBS inflow-With Demand)
grand_id	a1	a2	a3	1980-01	1980-02	1980-03	1980-04	1980-05	1980-06	1980-07	1980-08	1980-09	1980-10	1980-11	1980-12	1981-01	1981-02	1981-03	1981-04	1981-05	1981-06	1981-07	1981-08	1981-09	1981-10	1981-11	1981-12	1982-01	1982-02	1982-03	1982-04	1982-05	1982-06	1982-07	1982-08	1982-09	1982-10	1982-11	1982-12	1983-01	1983-02	1983-03	1983-04	1983-05	1983-06	1983-07	1983-08	1983-09	1983-10
753	0.95		0.05	23115	22869.9	22819.4	22856.2	22579	22995.4	23707.5	23706.2	23700.6	23888.7	23961.8	23515.1	23312.9	23164.7	23197.4	22695.6	22242.1	23939.5	25297.1	25204.9	24743.1	24444.8	24301.6	24112.6	23619.7	23472.8	24027.1	25201.1	25678.3	27129.5	29537.2	30151.2	29690.9	29588	29382.2	28905.4	28506.3	28298.2	28691.3	28352.9	27638.6	27859.1	28915.2	28970.8	28286.5	27678
870	1		0.05	21064.5	21340.9	21921.1	22140.7	21690.4	21382.8	21159.5	21054.1	20940	20902.7	21120.6	21338	21304.9	21688.2	22161.6	21905.7	21372.1	21337.4	21645.6	22071.7	21828.8	21430.9	20824.1	20544.3	20359.5	20951.3	22133.4	23757.7	24591.3	26129.1	26369.7	26108.1	25450.1	24971.9	24930.8	25066.1	24506.7	24286.7	24956.4	25181.2	24860	24032.4	23224.2	22709.1	22736.9	22268.5
597	1		2	15998	15735	15608.9	15375.1	16189	17762.8	18411.5	17860.2	17384.2	16907.3	16484.7	16099.7	15691.3	15240.6	14786.2	14240.1	13813.4	13671.5	13336.4	12874.5	12522.3	12345.8	12117.5	11831.1	11474.9	11232.4	11148.7	11040.4	11564.4	12574.1	13331.7	13307.3	13296.5	13321.1	13368.3	13390.2	13298.6	13262.5	13371.9	13548.9	14388.4	17077.4	20101.6	20895.3	20675.6	20438.7
307	1		1	15230	15057.6	14929.7	14889.3	14721.5	15250.5	15855.3	15673.1	15394.7	15184.3	15138	14986.5	14937.5	14871.1	14918.8	14839.4	15009.9	16961.7	17765.6	17493.7	17066.2	16747.6	16501.5	16283.8	16013.6	15990.6	16318.7	16574.5	16725.5	18056.5	19339.6	19294.8	19036.6	18860.7	18699.2	18553.9	18406	18290.2	18264	18096.2	18027.5	18152.2	18339.9	18265.8	18002.3	17748.7
1753	0.3		0.7	1560.48	1626.16	1724.43	1937.97	1925.75	1882.55	1828	1734.92	1662.9	1616.18	1576.58	1556.86	1486.48	1491.05	1469.54	1433.07	1393.13	1470.75	1470.64	1458.89	1455.34	1420.55	1391.62	1416.16	1587.46	1829.34	1982.42	2037.83	1981.16	1885.4	1812.81	1765.27	1804.62	1750.94	1695.6	1890.6	2042.87	2118.67	2139.3	2238.79	2396.15	2445.89	2349.49	2213.06	2073.88	1961.41
297	0.65		0.75	2222.25	1531.59	916.746	756.37	2128.96	3642.45	4144.88	3994.73	3724.31	3410.61	3031.38	2602.15	2312.69	1879.44	1470.01	1125.48	1781.13	3958.9	5576.94	6161.67	5724.95	5069.61	4334.79	3534.44	2647.86	1839.02	1149.09	725.3	955.836	2578.69	4062.59	4174.93	4076.51	3889.12	3576.32	3171.66	2773.36	2363.6	2004.08	1663.09	2027.74	3784.74	4828.85	5141.94	4794.9	4280.1
1036	1		2	3514.05	3478.15	3468.83	3474.28	3452.32	3436.34	3435.62	3397.73	3352.84	3305.32	3269.45	3231.5	3180.13	3144.06	3104.67	3056.53	3020.69	2994.85	2954.55	2924.76	2884.88	2843.68	2818.2	2785.72	2783.31	2900.61	2947.83	2961.86	2935.37	2949.33	2978.71	2967.38	2951.25	2917.59	2896.24	3123.19	3259	3278.66	3317.77	3406.66	3547.52	3574.16	3576.53	3558.4	3530.99	3481.02
989	0.1		2	638.594	635.49	637.733	672.356	638.298	638.014	640.407	653.43	662.86	661.912	668.613	671.59	668.592	671.86	673.358	673.121	707.544	838.095	970.329	897.897	797.982	702.316	659.222	633.87	633.961	644.129	644.738	634.919	637.704	718.168	706.035	671.362	647.233	638.087	639.097	675.135	657.388	634.176	635.832	792.013	935.6	948.564	881.445	775.944	678.332	639.44
1026	1		8	3900.29	3903.19	3903.99	3906.19	3897.12	3888.3	3869.21	3848.71	3833	3824.83	3828.57	3830.94	3828.22	3828.2	3825.1	3818.82	3819.47	3820.62	3813.95	3809.5	3801.32	3799.36	3808.65	3808.89	3811.6	3832.65	3829.94	3825.16	3815.83	3816.23	3808.66	3800.35	3797.84	3791.44	3795.36	3830.85	3838.39	3840.65	3839.25	3845.91	3857.67	3848.65	3839.81	3822.57	3807.66	3806.47
1848	0.15		3	381.106	401.375	506.055	821.366	860.055	793.255	716.963	625.393	532.067	462.003	411.674	379.659	369.449	372.967	371.971	387.165	399.83	500.526	549.642	570.529	608.142	632.599	661.98	699.395	798.856	941.662	1035.98	1176.83	1203.19	1108.21	981.468	867.63	759.12	692.794	587.65	727.084	988.488	1028.19	1065.77	1184.32	1331	1398.38	1267.64	1134.18	993.123	869.035
1869	0.3		0.05	334.162	336.275	695.514	1329.89	1301.29	1052.24	791.578	473.894	316.13	330.655	326.065	319.817	312.191	331.216	329.396	324.785	336.887	401.446	431.037	431.189	438.948	440.124	441.441	437.825	572.975	746.072	860.402	1219.31	1303.27	976.865	668.646	385.36	329.329	325.911	333.066	797.421	1373.82	1570.18	1614.38	1767.24	1867.38	1798.87	1441.94	1063.09	659.77	346.98
7313	0.25		2	271.547	272.7	276.49	282.678	309.73	357.329	332.2	256.17	246.402	251.772	260.517	266.884	270.807	272.85	276.945	281.682	314.574	382.457	350.723	262.859	249.532	249.147	255.572	260.773	261.036	263.985	273.017	283.694	304.463	352.94	358.432	278.688	246.514	249.848	258.512	267.455	271.801	274.142	278.179	284.094	294.951	312.702	314.344	262.426	245.393	258.897
1042	0.8		0.05	1620.86	1624.13	1676.22	1812.56	1868.64	1897.32	1885.52	1829.82	1773.5	1721.81	1679.42	1638.15	1589.4	1551.3	1519.64	1506.32	1513.57	1539.6	1531.47	1499.69	1460.87	1418.89	1395.01	1361.76	1339.31	1534.1	1620.25	1657.62	1698.1	1774.6	1810.66	1789.05	1752.54	1705.11	1674.59	2240.2	2445.13	2445.88	2445.76	2446	2445.99	2436.87	2411.19	2331.96	2245.63	2177.25
884	0.05		2	227.983	222.807	224.892	227.761	222.425	221.532	208.886	209.88	221.952	229.86	231.077	226.202	229.846	229.574	225.665	223.382	217.286	217.195	220.709	218.233	207.897	228.208	228.908	229.624	229.37	227.732	229.509	230.524	226.875	229.348	220.979	212.243	210.007	234.406	231.576	225.323	219.007	217.967	229.589	228.382	227.305	223.591	223.005	208.767	220.404	225.469
1144	0.15		0.85	240.09	254.016	256.98	261.144	264.969	262.297	246.271	225.754	224.161	244.139	245.31	250.835	246.384	242.729	242.965	238.517	239.253	261.592	264.062	254.208	242.236	243.429	272.937	274.741	269.556	294.382	305.424	305.892	308.502	352.347	360.213	344.621	321.474	303.956	290.205	332.217	357.945	357.072	367.312	362.339	359.133	352.599	346.815	325.349	301.882	281.516
1006	0.05		7	205.955	206.165	206.627	214.219	207.843	206.311	205.666	205.913	206.128	206.699	206.154	206.379	206.123	206.162	206.086	206.423	209.12	218.764	227.345	222.92	212.352	210.223	214.175	207.063	205.901	216.542	212.527	207.552	207.273	216.652	210.196	210.951	210.536	206.183	206.687	228.431	226.342	218.348	208.47	223.21	249.035	244.972	237.47	219.928	206.623	213.715
1048	0.3		2	920.057	909.741	898.33	894.891	898.711	898.096	886.582	865.687	848.953	834.191	821.153	809.621	796.168	783.911	772.296	758.54	747.765	741.62	728.85	719.426	706.958	698.646	701.882	696.426	687.123	687.144	682.763	673.458	679.524	709.137	713.348	702.935	686.773	673.503	663.648	659.794	651.99	648.225	642.603	649.319	656.433	659.282	655.044	639.67	625.522	622.694
1032	0.65		2	608.75	598.168	591.84	605.351	601.793	585.23	560.33	536.549	520.463	505.782	492.992	481.937	467.697	455.117	444.128	432.64	426.709	420.412	409.943	399.642	387.899	380.669	384.907	378.211	370.482	373.322	371.8	366.524	368.931	404.745	414.985	401.483	389.031	377.928	369.852	372.223	372.166	382.34	386.233	420.156	457.963	462.002	450.117	429.014	413.306	411.354
355	0.5	0.1	2	391.032	390.545	392.381	394.393	394.409	399.074	362.236	289.492	263.911	263.978	268.287	272.499	275.604	277.703	280.409	281.266	286.245	310.772	280.933	204.783	172.811	178.742	185.315	191.492	196.006	200.651	209.027	216.926	219.707	232.354	226.379	179.114	173.359	185.469	200.384	213.14	225.406	237.742	249.651	258.146	267.107	287.597	299.296	239.726	203.137	206.942
1101	0.05		5	169.408	169.094	175.143	202.973	204.84	197.318	186.138	173.949	169.619	169.986	170.248	169.759	169.853	169.958	169.368	170.443	169.631	173.836	173.214	170.08	170.028	170.587	170.062	169.964	170.449	174.451	175.781	178.242	177.665	172.41	169.851	170.081	169.812	170.12	170.394	185.435	208.946	213.083	215.5	223.06	231.584	238.784	224.545	206.517	188.38	173.156
1023	0.05		4	161.596	161.32	161.866	175.473	173.97	166.761	162.988	162.744	163.035	163.257	163.136	163.171	162.901	162.969	162.982	162.941	163.087	162.174	161.805	162.18	162.443	162.416	166.989	162.666	162.797	162.977	162.656	162.048	168.088	189.781	195.679	182.521	167.815	162.878	162.902	162.681	162.327	161.325	161.974	179.052	177.421	176.574	177.293	165.623	162.796	162.888
1864	0.4		1	158.542	154.841	250.054	445.537	458.942	406.369	347.776	274.619	197.694	155.823	148.539	147.617	147.874	153.35	149.702	151.947	157.335	187.906	200.794	205.171	212.681	220.932	235.317	244.794	294.781	352.659	389.942	467.458	501.269	438.673	363.059	307.701	309.637	298.111	249.641	396.467	593.661	646.604	691.551	783.415	851.106	851.449	746.86	619.239	518.735	411.168
1021	0.05		4	121.609	121.669	121.806	121.969	122.999	125.655	128.8	125.755	123.729	123.907	123.874	125.487	125.212	124.678	126.392	126.435	130.685	131.439	122.811	121.724	122.678	122.311	126.044	121.648	121.756	121.554	121.75	121.724	128.004	138.173	134.591	124.571	121.326	121.526	121.786	121.697	121.73	121.936	122.322	122.591	121.917	124.285	122.209	119.693	121.187	122.224
1120	0.05		9	114.537	115.082	115.04	114.915	115.316	115.021	114.936	114.265	114.386	115.368	115.708	116.609	116.071	115.529	116.946	117.477	119.182	125.705	119.338	115.066	115.005	116.549	114.574	114.376	113.924	114.889	115.259	115.001	129.027	148.445	148.479	135.492	121.305	114.3	113.421	114.908	114.868	115.219	115.145	114.947	116.435	115.043	115.068	115.031	114.881	134.852
182	0.9	0.1	0.75	1005.21	1102.7	1102.7	1102.7	1102.67	1092.44	1054.02	1000.49	956.553	920.61	876.745	855.844	827.274	818.787	815.754	838.976	821.622	751.49	657.558	587.422	543.834	507.654	527.606	706.906	1029.62	1102.7	1102.7	1102.7	1102.7	1102.59	1085.09	1044.72	1016.68	995.173	1016.71	1099.53	1102.7	1102.7	1102.7	1102.7	1102.7	1102.7	1099.79	1084.55	1062.14	1039.83
7311	0.05		4	95.5662	99.1141	104.633	106.105	104.195	103.941	102.893	103.324	103.639	103.756	104.077	104.701	104.782	104.838	104.875	104.865	106.039	110.344	104.617	103.49	102.671	102.124	104.104	104.153	104.285	104.372	104.505	104.313	105.25	118.036	115.545	103.875	102.487	100.855	99.678	100.57	104.293	104.898	104.674	115.678	106.91	104.261	104.676	104.681	104.819	105.844
1755	0.5		0.85	122.815	143.524	219.132	287.582	280.676	266.387	242.736	211.971	177.954	141.458	106.691	99.9031	100.734	180.753	215.223	223.073	227.77	330.625	341.046	322.77	301.987	277.429	255.595	284.516	406.686	536.801	605.943	633.245	617.579	550.431	469.847	385.198	366.636	284.112	196.923	171.127	167.479	166.739	126.667	116.147	313.62	488.279	483.291	459.123	433.744	413.877
1192	0.05		5	179.96	184.514	183.878	186.78	189.161	185.653	177.588	168.395	160.384	158.218	156.889	155.995	151.739	149.558	147.16	144.357	147.788	157.965	156.097	150.144	148.401	149.224	152.026	149.641	147.969	150.876	148.863	146.73	147.171	144.928	141.844	137.258	131.035	129.809	132.275	146.312	152.157	158.757	163.174	163.804	163.05	163.028	160.914	155.281	148.394	143.308
541	0.15		1	90.7478	90.7487	90.5035	89.1076	95.9587	141.556	160.019	120.994	91.3546	90.792	90.867	90.8547	91.0285	90.954	91.0363	90.7849	90.4296	88.9931	90.5421	90.8897	91.1058	91.4044	91.3509	91.2547	91.4417	91.3934	91.1629	91.1752	106.789	150.79	170.787	142.694	118.209	93.6747	90.736	90.8549	90.9305	91.0146	90.6506	90.0592	90.9663	137.24	180.451	170.513	137.702	99.7714
1716	0.4		2	150.516	151.242	156.754	162.397	159.119	155.048	151.904	146.205	141.786	139.202	139.143	140.753	137.257	139.57	138.946	136.803	142.313	153.939	152.003	150.286	147.763	144.006	143.831	143.729	151.525	172.312	179.91	180.806	177.278	178.555	174.656	166.871	164.726	163.495	160.531	185.012	197.884	201.363	201.126	208.248	232.551	235.751	226.208	213.088	202.913	205.231
1883	0.2		0.8	73.1353	74.3595	74.7195	80.2478	76.5698	73.8768	71.8369	72.016	72.4653	72.9418	72.5252	71.9501	71.9547	75.2225	73.3124	71.9763	72.1839	79.2236	73.9783	73.9805	71.8243	72.7782	72.0438	73.7816	78.5122	78.076	74.0606	73.0814	73.3882	72.6087	72.4269	72.3629	72.3795	72.723	72.4972	74.7403	84.7008	96.9424	108.756	110.767	101.941	92.8509	78.5364	71.4989	72.1085	71.7314
895	1		0.45	488.147	486.444	483.274	482.733	478.496	473.548	464.582	459.013	459.678	459.732	462.88	462.591	459.821	457.472	454.122	454.07	452.628	450.215	446.75	443.837	442.207	442.879	443.943	445.065	444.801	443.928	440.899	440.935	441.526	444.284	439.929	433.054	430.17	435.791	441.571	446.385	450.093	450.618	451.319	454.913	453.998	451.277	447.716	441.6	437.026	437.593
1093	0.1		1	50.8648	50.9173	50.6712	50.3588	52.134	56.2012	60.166	57.1693	54.6264	57.9263	63.7016	74.7645	78.693	84.1886	109.002	120.12	151.926	195.695	138.687	65.5967	49.4428	55.7234	51.0467	50.5566	51.7767	87.6908	54.1282	50.6992	77.2091	113.137	80.2522	51.9822	49.3035	47.2888	48.6593	93.473	83.8357	58.6056	55.5328	53.7883	100.632	106.388	63.2273	50.5515	46.4647	41.8357
1709	0.2		1	51.5544	51.8793	68.593	90.5902	95.6929	88.6315	86.2859	84.5147	79.0489	67.5267	59.287	63.7384	57.631	64.5866	94.3179	119.219	147.304	190.393	182.578	164.454	146.865	123.014	109.459	99.4682	105.771	128.558	157.677	177.903	161.028	166.255	159.918	142.371	120.568	99.675	84.2804	88.3512	78.8818	71.5905	76.0052	92.8328	109.866	111.864	105.965	101.476	83.3687	67.5155
1017	0.1		1	50.1412	50.7414	50.449	51.4254	50.0244	52.2118	53.419	54.6989	56.4584	58.2816	60.5729	63.5397	65.7221	68.5476	72.236	76.4142	89.7719	89.6228	62.046	49.9693	49.9815	49.9309	49.6786	49.7145	49.4852	60.6521	50.7156	49.2834	49.7652	49.9529	50.2535	51.4116	60.9327	54.7785	50.286	108.154	139.353	132.611	120.878	123.148	181.624	154.174	86.3046	49.5302	49.3338	49.2854
[truncated: 434 more columns]
