# Supplementary material for: The value of observed reservoir storage anomalies for improving the simulation of reservoir dynamics in large-scale hydrological models
Source: Copernicus journal article supplement (doi:10.5194/hess-29-4073-2025), 2025-09-03
Supplement: Supplementary file 5 [file CH_results_calibrated_against_storage_anomaly.xlsx]

## Sheet: Readme
	Sheet name	Note	Inflow source	Total number of reservoirs	Number of reservoirs where downstream demand is taken into account
	Outflow(WG inflow-No Demand)	Simulated outflow (×106 m3/month) where downstream demand is not considered for irrigation and supply reservoirs.	WaterGAP	100	0
	Storage(WG inflow-No Demand)	Simulated storage (×106 m3) where downstream demand is not considered for irrigation and supply reservoirs.	WaterGAP	100	0
	Outflow(WG inflow-With Demand)	Simulated outflow (×106 m3/month) where downstream demand is considered for irrigation and supply reservoirs.	WaterGAP	21	21
	Storage(WG inflow-With Demand)	Simulated storage (×106 m3) where downstream demand is considered for irrigation and supply reservoirs.	WaterGAP	21	21
	Outflow(OBS inflow-With Demand)	Simulated outflow (×106 m3/month) where downstream demand is considered for irrigation reservoirs.	Observed	35	2
	Storage(OBS inflow-With Demand)	Simulated storage (×106 m3) where downstream demand is considered for irrigation reservoirs.	Observed	35	2

## Sheet: Outflow(WG inflow-No Demand)
grand_id	a1	a3	1980-01	1980-02	1980-03	1980-04	1980-05	1980-06	1980-07	1980-08	1980-09	1980-10	1980-11	1980-12	1981-01	1981-02	1981-03	1981-04	1981-05	1981-06	1981-07	1981-08	1981-09	1981-10	1981-11	1981-12	1982-01	1982-02	1982-03	1982-04	1982-05	1982-06	1982-07	1982-08	1982-09	1982-10	1982-11	1982-12	1983-01	1983-02	1983-03	1983-04	1983-05	1983-06	1983-07	1983-08	1983-09	1983-10	1983-11
610	1	4	2060.87	4583.12	3663.81	2124	3935.16	4905.99	2090.51	1574.18	1518.11	1564.64	1506.92	1549.93	1543.56	1390.12	1750.74	1614.66	1541.77	1476.87	1362.25	1176.55	1134.71	1171.06	1131.47	1168.59	1208.45	1450.99	1616.92	1352.09	1201.29	1142.27	1150.69	1088.65	1059.51	1098.05	1068.46	1400.67	1388.12	1499.36	2043.77	1799.06	1280.27	1115.37	1275.61	1472.01	1387.83	1453.46	1392.85
753	0.9	2	1674.02	1516.52	1715.93	1854.54	2011.28	1773.23	1594.78	1442.78	1425.71	1520.73	1464.57	1562.97	1576.21	1412.06	1625.61	1613.86	1855.02	1991.52	1568.2	1416.3	1366.1	1464.5	1422.42	1462.3	1512.72	1342.73	1664.16	2264.59	2225.62	2595.35	2183.47	1632.75	1558.44	1692.34	1696.92	1765.03	2286.65	1871.61	2368.06	2376.44	3026.16	3278.76	1725.17	1541.82	1488.36	1609.35	1615.56
870	0.9	0.05	2084.79	1883.03	2084.79	2017.54	2084.79	2017.54	2084.79	2084.78	2017.53	2084.78	2017.53	2084.78	2084.78	1883.03	2084.78	2017.53	2084.78	2017.53	2084.78	1974.64	1910.94	1974.64	1910.94	1974.64	1974.64	1783.54	1974.64	1910.94	1974.64	2365.69	2358.07	2252.16	2109.86	2468.78	2400.38	2387.45	2336.28	2034.4	2602.6	2712	2668.52	2253.79	2117.43	2150.56	2185.49	2309.85	2326.34
597	1	3	1329.47	2124.81	2397.61	2845.19	6398.19	3648.5	1097.58	776.897	852.253	1053.49	1071.56	1071.6	1001.12	790.908	838.55	1197.25	1652.2	1197.19	595.181	456.233	439.151	573.091	758.082	775.462	766.702	729.537	1402.79	1515.77	2323.98	1820.38	820.232	594.575	694.259	905.329	952.967	1076.57	1012.02	1142.07	2140.08	1965.85	2974.63	2982.9	1385.9	902.6	880.49	1030.96	1040.99
307	1	5	321.926	304.34	368.612	450.892	395.934	465.284	321.98	283.777	300.224	333.171	333.002	344.229	347.374	324.584	392.671	479.254	900.108	584.443	396.108	343.216	345.752	375.705	388.642	396.791	394.566	384.745	595.622	862.717	692.131	1045.64	601.622	468.183	448.872	493.381	484.073	507.411	526.321	457.549	527.902	538.41	533.238	473.61	427.29	385.02	389.771	446.126	442.839
1753	0.15	5	9206.02	8884.64	19537.1	11196.2	5707.71	3550.92	2550.03	2096.36	1741.54	1965.45	1723.84	2352.21	2358.16	7306.25	5881.97	5361.89	2855.69	2688.27	1747.32	1252.11	1034.15	867.672	784.207	1991.08	12672.9	12026	9214.22	5739.85	3682.51	2509.99	2194.01	1968.42	1896.64	1603.48	1506.54	12651.5	8788.04	9936.96	7544.39	11740.1	11666.9	4649.77	2779.69	2144.38	1725.65	1538.84	2183.6
297	0.35	0.95	1262.05	147.278	318.295	1350.71	2471.33	2114.64	1119.47	321.571	285.79	217.328	241.032	210.248	235.758	229.468	193.849	347.118	812.921	1057.31	1998.05	1781.47	1712.51	1784.66	1650.82	1703.11	643.54	358.62	316.379	612.274	1901.71	2232.94	1054.44	359.486	441.207	381.827	255.516	269.364	260.329	235.367	306.627	462.48	584.471	648.943	614.52	1359.72	1270.15	1286.79	1340.81
1036	0.4	2	429.868	498.697	520.971	462.324	412.94	260.407	248.097	241.525	229.215	233.998	237.648	265.646	252.888	275.617	277.7	249.724	294.724	263.697	228.723	219.413	204.511	236.414	278.766	286.928	462.925	574.879	272.622	231.978	223.994	419.19	428.624	434.998	411.317	412.114	505.602	1254.88	504.969	439.935	480.573	626.024	641.667	471.921	468.673	456.427	433.561	462.703	783.722
989	0.65	2	410.191	873.771	1156.59	1118.6	572.743	429.236	331.142	288.77	249.816	236.163	241.519	353.769	280.602	382.643	397.027	321.731	734.71	2054.02	961.608	655.55	453.138	443.093	1001.8	770.4	768.802	1509.09	834.891	608.095	836.563	1296.17	750.918	643.302	566.299	431.348	421.608	1333.36	674.923	819.714	768.113	2785.86	1586.07	730	590.45	457.556	379.82	775.741	1323.93
1135	0.25	3	136.209	190.945	164.236	138.279	300.375	249.099	120	91.4516	275.979	315.474	237.042	448.991	171.697	157.463	434.598	220.355	300.604	333.57	206.179	170.477	141.353	1689.19	554.273	414.278	344.563	561.053	447.252	311.064	1495.08	1226.76	760.914	486.74	364.814	313.007	261.475	308.312	353.292	770.663	618.26	545.478	564.514	418.425	296.999	223.358	179.751	1411.24	671.153
1269	0.2	6	834.883	839.224	595.522	1141.03	873.786	439.527	306.74	239.133	193.33	184.043	173.659	179.152	175.294	193.097	232.921	202.979	218.434	491.926	258.503	190.218	171.909	162.531	182.601	185.651	212.494	353.665	282.534	568.043	450.948	265.783	228.02	189.738	157.532	157.101	243.033	1636.94	842.768	1386.91	928.267	630.709	699.357	494.91	362.251	267.953	212.898	191.157	173.96
1077	0.1	3	191.394	349.089	259.66	272.322	832.482	398.224	255.215	162.821	128.684	137.402	104.805	149.385	92.9909	106.297	235.402	145.362	165.968	244.107	122.634	152.751	104.489	451.215	677.665	416.907	377.785	1158.51	478.771	332.71	1392.68	1161.16	549.1	407.743	311.048	259.413	218.219	432.421	365.129	932.159	640.144	714.208	849.267	578.938	375.882	277.731	211.25	1129.22	418.566
1026	0.4	2	206.9	401.732	373.885	260.159	183.992	199.056	133.652	119.382	106.654	107.461	143.266	240.287	162.266	251.754	229.192	158.666	306.261	349.483	174.163	222.015	133.364	230.538	335.637	251.757	564.229	723.558	220.324	151.674	127.955	189.612	145.918	199.096	143.714	125.818	281.812	1452.32	290.381	275.336	228.43	544.827	559.742	221.849	200.917	179.422	160.925	294.752	517.662
740	0.05	0.05	31.1193	28.1077	31.1193	30.1154	29.6938	28.7359	29.6938	29.6938	28.7359	29.6938	28.7359	29.6938	29.6938	26.8202	29.6938	28.7359	27.9708	27.0685	27.9708	27.9708	27.0685	27.9708	27.0685	27.9708	27.9708	25.2639	27.9708	27.0685	34.1054	33.0053	34.1054	34.1054	33.0053	34.1054	33.0053	34.1054	34.1054	30.8049	34.1054	33.0053	34.6118	33.4953	34.6118	34.6118	33.4953	34.6118	33.4953
1294	0.35	6	53.1319	49.9725	51.7699	54.3204	91.2432	55.0917	47.8256	27.8274	63.7047	77.4629	99.993	113.53	105.962	100.606	265.008	198.157	185.041	513.512	203.905	183.67	164.208	197.24	191.003	169.34	163.343	152.843	154.949	98.0241	115.829	90.031	87.1971	81.8583	74.3825	74.1564	71.1892	87.1714	106.565	179.976	216.161	113.603	116.47	98.3725	85.2356	76.2988	66.8206	65.3865	61.388
1848	0.2	0.05	254.044	152.824	271.907	297.708	171.803	166.261	171.803	57.0831	16.6261	17.1803	86.4559	171.803	146.864	155.177	171.803	166.261	48.2468	74.995	43.7471	23.4984	14.249	18.9987	14.249	50.4966	77.4948	69.9953	77.4948	74.995	251.01	242.913	251.01	207.286	24.2913	25.101	53.4408	251.01	251.01	226.719	251.01	242.913	303.529	293.738	303.529	303.529	293.738	153.723	99.871
1869	0.45	3	511.044	410.616	1427.56	674.032	179.222	132.946	108.661	88.2924	74.4584	79.8959	83.5254	105.883	111.505	207.049	282.511	159.454	96.7066	76.6345	65.3081	55.7205	50.8479	50.9532	48.8981	50.773	268.585	325.086	192.743	707.984	163.643	93.106	72.8248	63.203	55.0642	54.6003	53.9312	1883.29	617.025	705.983	472.162	761.984	748.739	161.858	136.04	97.3911	78.3014	76.0949	81.9101
1863	0.7	3	215.56	146.15	330.998	131.883	134.002	115.931	112.297	108.174	103.949	111.544	112.456	112.446	109.382	180.323	120.947	114.484	87.3165	83.6904	82.7315	81.2124	77.4606	79.1877	75.9626	107.745	210.812	203.56	120.046	128.148	93.2377	85.2069	84.5299	82.2783	77.3866	81.1961	103.134	176.923	130.88	165.728	170.611	135.054	106.112	93.2045	91.0738	87.6379	83.4179	84.1636	132.619
1770	0.45	3	192.79	165.473	248.25	126.451	97.1764	81.6181	79.0199	74.7708	69.488	69.4703	66.5163	73.2597	83.8015	177.551	106.84	116.701	71.5774	90.5691	64.8975	60.7751	56.0836	55.9993	57.5177	128.239	215.603	185.528	178.125	83.9471	85.4391	76.544	74.4065	71.563	67.6309	67.246	78.6634	215.22	131.261	146.452	105.464	122.922	142.001	88.1386	77.6229	72.7012	66.7428	66.6216	66.207
965	0.15	5	118.708	101.283	283.972	306.91	137.892	85.2677	41.8478	36.6016	33.9955	36.2272	36.9256	41.6381	36.8752	37.3856	55.2189	33.6602	81.0304	17.2033	5.77787	31.9108	22.4459	14.8365	20.2854	59.619	36.0568	146.623	245.152	89.6604	355.376	177.514	137.932	90.5699	76.9989	70.3933	60.8594	63.0719	90.0649	130.165	332.022	384.984	181.099	206.176	105.989	65.1723	54.759	57.8892	70.7843
1247	0.25	4	66.8518	78.0983	67.6204	62.5849	98.2449	64.7338	45.194	38.7747	193.819	260.441	173.89	283.279	106.054	86.5417	184.694	111.987	98.278	90.1939	95.7342	92.7084	85.8523	831.502	166.798	159.032	144.144	166.458	162.453	122.382	421.565	315.74	199.754	147.914	123.948	114.745	102.444	110.484	121.307	150.459	148.824	136.897	113.359	122.051	89.5925	79.6247	71.4796	71.3526	69.8794
7313	0.4	2	263.643	288.928	490.396	745.624	839.081	1133.9	271.05	94.4292	221.136	291.604	302.46	316.066	298.599	347.662	513.922	573.407	1315.29	899.501	231.775	67.016	61.7896	210.551	261.75	353.075	318.58	525.063	1062.96	1591.61	1489.09	1079.58	380.266	161.848	211.535	380.939	341.194	421.129	499.201	434.901	1058.8	875.056	772.515	580.943	326.473	165.87	180.892	334.401	398.58
1287	0.25	3	695.824	710.175	519.865	478.407	535.671	400.229	317.013	253.928	209.154	450.808	255.17	348.092	238.253	224.057	337.458	301.28	358.268	1596.21	548.471	392.22	335.339	1280.53	934.124	627.947	419.548	657.263	514.757	499.906	1249.12	872.699	569.765	453.093	363.671	339.354	360.23	1145.22	626.977	1147.44	1173.77	676.61	807.803	527.625	422.308	347.23	286.589	270.427	236.949
1186	0.15	7	248.897	177.771	103.981	155.154	119.772	63.2891	50.181	38.921	31.5847	33.2951	32.5424	34.7439	33.3721	30.4203	38.3216	37.266	58.1361	150.488	56.2873	42.8037	36.5264	36.7118	45.3224	43.7423	44.5753	97.638	60.1844	48.5241	45.8432	37.0765	29.8393	23.6141	18.8149	19.0003	20.763	341.145	57.3073	247.794	160.716	59.9832	55.5292	47.8707	37.3138	27.6221	21.8916	20.9964	20.5387
1042	0.25	4	31.2856	39.7051	40.8761	32.8998	29.0458	26.7248	26.5657	25.8059	24.4454	16.948	8.41088	5.79367	10.0289	24.7653	26.7623	21.9329	23.7251	24.9265	21.0069	20.1053	14.9631	15.5469	17.4104	17.017	53.4493	61.5767	26.0739	21.9886	37.6115	38.9541	36.4755	35.7357	34.026	34.7951	45.857	146.793	42.8165	39.0602	42.4536	62.1227	69.8747	56.7786	56.5675	55.1024	52.3844	59.3293	112.749
884	0.05	0.95	2815.13	2542.58	2815.83	2643.9	2815.07	2723.85	2814.02	2077.47	2071.49	2140.65	2071.65	2140.98	2141.3	1933.93	2141.99	2073.42	2141.99	2072.39	2141.14	2025.55	1957.28	2022.41	1898.3	1963.54	1904.8	1769.77	1998.68	1861.66	1997.06	1928.81	1921.21	2293.14	2154.21	2294.92	2219.94	2226.37	2292.22	2069.32	2235.19	2235.52	2312.81	2226.33	2230.85	2458.21	2307.3	2456.85	2377.07
1273	0.2	9	33.1696	38.5508	34.4227	30.1681	63.5465	29.9952	15.0346	12.3525	13.4035	16.7806	19.6677	68.7492	32.7979	32.5005	70.9727	41.187	34.548	65.349	30.5493	22.1413	17.0256	89.2545	37.3263	39.1581	40.254	58.6292	69.8685	52.4604	170.44	66.2691	57.0901	41.1491	31.3679	27.2854	23.3116	26.3499	37.887	49.3285	64.455	46.8222	38.4267	30.2683	22.3576	16.931	13.8687	13.7985	13.0563
961	0.1	0.05	0	0	0	0	0	0	0	0	0	0	0	0	0	0	0	0	0	0	0	0	0	0	0	0	0	0	0	0	0	0	0	0	0	0	0	0	0.331933	0.29981	0.331933	3.01952	3.31933	53.7512	55.543	55.543	53.7512	44.2552	52.1387
1144	0.1	1	1294.58	1561.72	1144.91	1067.84	1227.09	882.48	583.371	417.418	388.881	1389.61	882.905	1328.68	839.315	835.885	1036.96	810.71	902.365	1937.32	997.316	768.27	612.047	2042.65	1873.87	1297.93	1019.18	2377.39	1505.28	978.719	2375.55	2982.3	1621.98	1095.07	894.217	846.455	871.551	4167.25	1616.62	1984.15	1841.72	1365.56	1776.28	1204.85	1105.6	859.332	707.14	691.819	676.021
616	0.05	0.65	1752.58	3939.63	3828.2	2191.53	3434.42	4717.2	2207.64	1759.18	1649.36	1762.61	1652.81	1765.19	1713.05	1590.13	1713.7	1653.41	1710.04	1595.83	1705.42	1594.78	1582.08	1637.84	1536.03	1640.63	1641.51	1478.18	1641.8	1536.98	1589.11	1531.83	1535.78	1382.31	1300.32	1306.58	1303.23	1350.41	1350.58	1211.99	1350.97	1262.45	1265.23	1258.11	1302.89	1318.38	1271.9	1318.9	1275.36
911	0.25	0.7	570.021	482.927	619.46	641.835	424.786	405.026	257.947	206.512	203.171	176.339	153.738	161.883	145.446	176.413	169.324	163.346	133.899	117.165	153.59	122.437	106.757	98.8502	117.57	182.919	124.694	611.78	1062.13	807.511	1092.13	693.547	726.186	574.603	515.174	535.057	689.367	1115.2	748.894	1317.66	1877.35	2157.62	1317	1002.26	1042.86	727.92	594.237	603.085	1055.74
1006	0.25	5	29.2664	68.487	64.6787	42.3822	30.9503	23.5093	20.9608	18.6618	16.4611	17.3888	16.8371	23.709	19.6734	37.2917	29.0611	22.7673	50.6321	91.5636	32.4121	26.4184	20.8494	55.8272	58.5052	44.59	92.9456	73.3375	36.2019	27.6368	26.3083	49.7581	27.7312	65.6667	27.889	24.6501	42.8215	149.037	36.775	38.4877	36.3981	139.394	81.5474	40.1282	35.7118	31.3915	27.6408	121.877	124.848
1048	0.15	0.7	398.782	815.689	920.377	1629.83	1456.25	1173.36	519.803	435.132	359.847	342.313	310.352	310.419	294.611	262.483	297.873	266.624	227.526	251.044	366.158	351.785	279.823	172.561	456.665	370.409	325.447	927.832	542.956	392.444	1118.68	1379.91	648.701	511.248	415.452	361.804	305.168	347.032	303.014	512.792	753.916	1069	871.431	870.622	713.651	607.576	530.522	732.856	550.051
1123	0.05	4	63.5544	82.1235	38.2213	37.4559	52.3228	11.4828	11.3848	9.08562	45.9691	28.9818	15.4015	37.1925	18.1649	32.3561	26.935	16.4422	33.4271	164.289	131.991	71.3688	19.0185	23.8511	27.0763	20.2436	90.1974	116.761	53.0516	38.9796	174.187	86.0135	35.0577	26.336	16.7311	16.3425	25.6151	193.325	75.582	81.4077	85.5522	46.037	154.346	62.8579	32.8085	18.0837	13.063	14.9987	18.132
1032	0.35	2	155.345	273.024	381.912	308.284	214.287	146.849	113.449	95.1954	79.4197	72.6376	62.0828	61.7153	54.5517	56.0413	82.1705	69.9987	118.138	153.3	89.8609	75.0373	57.5677	60.8902	253	157.537	200.86	279.202	187.047	126.274	483.857	537.792	219.591	174.2	134.162	114.933	96.3622	230.51	208.744	378.643	335.994	608.492	453.777	265.596	203.287	158.654	128.885	278.154	202.984
1774	0.25	1	666.253	564.683	879.948	504.227	390.376	208.15	192.66	168.583	148.537	142.587	131.163	130.575	112.885	284.301	312.255	352.575	240.169	297.273	174.205	149.591	130.871	122.789	112.329	140.671	476.263	836.112	679.398	289.692	220.935	267.805	242.82	234.003	269.868	226.127	303.482	542.193	470.297	641.916	518.651	588.518	511.267	272.158	224.935	199.371	173.537	168.483	155.393
1781	0.25	0.85	887.688	682.943	1630.32	904.832	459.891	268.498	217.935	167.968	139.228	131.495	80.5546	101.102	139.13	825.933	614.045	606.927	247.448	289.048	153.611	116.93	97.6645	60.2657	35.8465	87.7633	867.514	1375.96	1066.81	473.672	374.263	297.792	230.265	254.466	179.308	168.454	236.665	912.969	676.813	1360.13	1340.88	1303.61	606.604	351.421	263.047	210.042	176.76	166.695	220.995
355	0.65	2	154.762	131.114	185.355	550.315	663.452	206.713	40.1427	27.6229	22.6955	44.8261	183.316	196.447	153.178	163.252	232.779	469.104	1014.86	234.059	50.4673	33.8327	28.3702	26.5199	62.3996	159.591	136.326	146.651	200.706	362.955	549.84	318.895	43.5558	27.3693	22.6872	43.6209	205.15	233.437	261.777	280.8	333.401	764.657	1342.27	496.748	86.3591	51.2814	127.169	187.21	213.152
1101	0.95	2	184.623	120.625	466.71	200.399	101.839	71.7338	58.267	50.516	44.8101	46.7353	111.855	108.984	93.2829	147.341	143.444	109.33	79.3756	82.1563	64.2543	50.2857	44.1593	43.05	41.7052	47.2913	120.629	197.099	115.283	179.404	92.6861	60.0386	48.795	43.7319	39.1886	40.3402	49.2784	678.688	215.307	176.171	116.197	273.791	329.39	94.089	69.8729	56.1178	48.6261	48.808	85.8224
1023	0.05	2	301.093	513.015	720.135	1074.69	1007.22	815.109	336.247	263.907	222.124	210.984	183.214	181.163	178.935	156.552	170.647	160.304	187.119	180.798	141.027	109.209	58.7506	27.1646	124.202	92.0463	85.1187	179.582	140.852	106.305	126.013	187.779	124.05	96.9308	62.8015	38.8165	22.4788	23.9318	38.8367	88.4456	213.752	909.463	420.744	335.51	291.685	243.831	193.87	191.539	181.499
1060	0.25	4	39.8799	69.9665	103.356	42.0948	33.1934	27.4197	21.8823	18.5055	15.8394	15.0687	16.4418	66.6351	23.2472	57.6331	63.2287	34.8277	72.9072	64.8868	30.0596	40.7786	23.6427	47.9647	92.7474	59.3435	142.194	113.718	39.9347	27.0644	24.5568	64.708	27.5765	23.0514	18.9332	17.2336	92.3403	302.304	75.6026	68.014	40.877	84.7731	134.84	38.9738	31.7977	26.9326	22.6768	23.7554	96.5042
1864	0.1	2	266.502	176.324	714.521	284.379	136.593	91.4573	75.2723	15.7267	16.672	29.9002	69.4444	105.308	75.6697	128.037	131.881	89.3368	42.4493	33.2701	21.8628	13.3228	9.91996	8.49177	7.80861	12.4522	146.066	161.378	104.719	267.179	138.614	98.4464	84.4246	92.5758	60.5403	95.6018	131.075	993.538	280.26	343.489	251.22	482.429	440.425	147.293	115.385	94.5396	83.3726	28.1536	127.07
1797	0.6	2	3580.44	2853.03	5421.81	2825.21	1805.18	1274.87	1142.51	1016.43	917.205	902.779	879.644	992.317	1099.86	2924.21	2077.4	2342.87	1066.02	1210.3	610.113	497.966	426.14	394.705	369.096	787.952	3235.84	4068.14	3374.89	1403.52	1294.38	1194.95	1096.33	1092.71	997.164	966.904	1236.79	3499.52	2309.62	3610	2972.77	3468.9	2367.17	1394.42	1076.15	938.757	824.692	798.355	863.561
305	0.45	0.2	1651.84	1300.35	1811.72	2162.48	3588.04	3555.75	1872.08	1039.84	1283.92	1301.64	1585.19	2069.51	1655.48	1924.95	1746.3	2200.45	2819.56	3184.67	1897.17	1376.56	1339.69	1736.06	1649.14	2076.05	1487	2861.45	3117.18	2978.51	2905.4	2728.31	1928.07	1003.27	1099.97	1733.45	1570.22	1741.22	2130.58	1671.41	2125.08	1734	1904.36	1716.53	2385.05	1665.33	1663.65	1675.13	1989.77
968	0.05	7	44.0208	49.9913	153.878	476.772	223.618	116.338	70.4466	67.7624	66.8267	71.073	67.8488	65.1858	62.0127	55.0474	62.2065	59.1899	141.002	65.9765	52.1662	61.0933	54.9969	58.8261	58.232	58.7416	56.6934	61.2395	83.3956	65.2666	125.685	105.737	72.6731	52.1728	42.3482	39.2129	36.1937	34.3266	36.4442	42.6728	105.779	140.091	91.653	160.204	78.2444	58.6774	60.6776	68.5943	72.8954
1019	0.15	5	11.6594	27.5528	42.207	25.6507	19.8	17.5566	17.3494	15.4165	3.05397	3.08264	3.49687	2.60002	2.59956	15.9772	19.8474	11.173	29.1344	28.7562	18.61	17.926	16.0445	13.2008	4.25757	4.24627	28.0317	58.338	31.9703	21.1551	18.152	23.4447	23.4656	22.969	22.1647	22.8236	19.5592	119.797	31.924	29.4449	34.4241	73.6516	43.986	35.2508	34.9571	34.167	32.6778	33.6819	45.1292
1302	0.8	10	17.0858	14.2497	14.9495	10.5774	14.2242	4.66984	4.03239	8.2604	24.9048	34.0102	40.5872	36.2204	37.7755	32.2632	72.7701	43.9011	35.4376	257.672	29.0267	21.4096	20.2422	26.3395	23.5719	20.4533	17.2573	17.466	15.0332	11.5725	17.6391	6.25689	8.44067	9.20635	9.26547	10.1646	14.3847	17.7849	23.8855	40.8387	57.3734	17.5547	15.3293	12.649	12.5211	11.5314	11.5185	13.646	14.3381
1824	0.1	0.5	8272.04	6982.21	17626.1	7967.79	4858.06	2837.02	2221.5	1858.19	1550.06	1852.27	1807.09	1862.53	2180.65	6778.11	4641.57	4752.26	2278.91	2136.09	1354.84	1096.39	831.32	724.155	672.941	1918.67	11442.8	9828.09	7433.88	4574.04	2910.57	2217.28	1947.97	1825.96	1595.86	1470.32	1486.48	11138.7	6205.77	8403.54	6701.99	9904.73	8166.69	3428.6	2316.2	1847.45	1516.34	1334.34	2144.86
1316	1	0.05	0	0	0	0	0	0	0	0	0	0	0	0	0.111258	0.100491	0.111258	0.107669	0.854172	1.07669	1.11258	1.11258	1.07669	1.11258	1.07669	1.11258	2.36451	2.13569	2.36451	2.28823	2.36451	2.28823	2.36451	2.36451	2.28823	2.36451	2.28823	2.36451	1.47981	1.33661	1.47981	1.43208	1.47981	1.43208	1.47981	1.00723	0.143208	0.147981	0.143208
1835	0.2	0.45	7202.1	6060.47	14649.7	6427.39	4035.95	2433.71	1954.78	1658.37	1481.57	1548.4	1407.51	1593.19	1781.93	5933.66	3989.2	4183.79	1930.01	1923.58	1134.06	892.23	737.484	628.939	582.466	1827.45	9081.37	8848.91	6456.92	3540.01	2451.54	1942.65	1724.88	1644.55	1452.92	1347.99	1480.45	8586.66	4989.29	7013.72	5508.1	7474.46	6110.71	2863.56	1959.46	1587.34	1321.65	1210.16	2006.05
1847	0.05	0.95	5984.7	5020.89	11537.3	5298.77	3077.47	2024.54	1643.31	1403.3	1224	1177.86	1177.56	1381.65	1495.18	4950.91	3344.9	3629.05	1665.44	1744.48	943.796	761.915	623.742	557.556	493.312	1361.72	6779.62	7666.8	5617.91	2630.14	2006.52	1633.16	1453.85	1402.15	1246.74	1173.9	1365.47	6671.39	3933.78	5799.19	4484.11	5839.8	4273.55	2378.27	1641.46	1354.83	1141.04	1057.95	1364.21
1231	0.75	7	136.45	92.7182	63.9181	55.0865	50.4483	36.2361	26.387	19.7893	15.273	15.3871	14.7259	15.9143	15.4141	13.9825	16.8274	17.4048	42.0054	272.236	60.3758	37.3981	29.1552	40.9915	82.574	59.1429	50.9713	62.0666	55.8824	44.3469	49.1713	40.6174	33.9759	24.6823	18.2189	17.1904	22.439	278.763	72.5786	156.992	90.5983	67.7915	55.3614	49.4464	39.3234	29.59	23.0145	20.3298	18.7521
1140	0.1	0.05	6.32307	5.71116	6.32307	6.1191	6.32307	6.1191	1.78427	0.79606	0.905861	1.53722	1.64702	2.52543	0.42548	0.384305	1.41369	0.535281	1.41369	1.64702	0.361936	0.423396	0.409738	0.423396	0.409738	0.423396	0.423396	0.320962	0.226722	0.0655581	0.423396	0.409738	4.78439	4.78439	4.63005	4.22878	0.87971	0.478439	3.11757	4.32138	4.78439	4.63005	4.78439	4.63005	3.43962	0.557023	0.417767	3.18896	4.17767
1296	0.25	10	39.056	25.3579	22.2407	19.0675	22.4041	15.8536	14.0115	12.9853	11.946	11.6772	10.7784	11.2863	11.7361	14.3158	14.935	12.7078	11.2815	52.0794	15.4214	12.9502	11.4043	23.9913	33.2188	15.8492	15.5495	14.3164	15.5698	15.6559	38.4671	14.9698	12.8119	11.3348	10.3942	10.1715	10.6953	38.9411	29.4699	52.3238	53.5817	24.5181	54.2499	17.3919	14.751	12.7708	11.0518	10.7763	9.77844
1659	0.1	3	9.45014	40.8045	84.8402	37.4406	23.3107	4.19134	4.17853	4.04697	3.75823	3.77531	3.63319	3.79058	4.11272	6.18642	4.44895	5.66124	7.51663	90.6596	93.2867	94.2713	62.0279	20.2292	14.4437	20.4276	34.1815	90.1085	102.66	92.2773	94.0611	45.8073	38.7822	14.1462	8.54273	10.0192	22.9342	51.5503	47.7811	43.4683	50.2685	47.711	49.7239	57.6409	58.2779	51.1995	10.6	32.2412	53.9256
1277	0.05	5	1.0765	0.972326	1.0765	1.04178	1.0765	1.04178	28.7343	13.7183	2.78074	2.87343	2.78074	9.5472	7.04454	8.43491	17.8894	15.2941	7.87876	23.6363	25.2847	6.19883	4.64912	3.26254	3.18098	2.52847	2.52847	2.28378	3.99661	4.64912	11.3373	4.64912	0.732717	1.0765	1.04178	1.0765	1.04178	1.0765	1.0765	0.972326	1.0765	1.04178	1.0765	1.04178	31.0538	28.3491	3.00521	3.10538	3.00521
1021	0.05	6	119.751	209.108	215.382	167.495	105.216	74.2439	56.8849	39.2408	22.5628	16.6821	12.0871	12.1128	7.23216	5.08454	8.03794	2.91934	11.4747	11.5621	6.34856	3.65215	5.85404	13.4546	126.834	65.1083	56.4086	205.243	89.0647	59.0064	188.401	138.733	91.5663	61.2236	44.4825	30.2053	21.6855	17.1576	13.1185	60.7689	374.053	258.418	127.915	117.807	72.6974	53.1561	39.7471	37.2344	38.8259
1280	0.25	3	33.333	31.4571	33.2506	30.0975	42.1448	28.6633	25.2785	23.3714	333.142	185.277	84.8359	132.629	117.588	86.9233	134.436	94.715	83.5981	69.4665	59.7285	56.3935	53.7098	126.776	66.6219	64.4359	63.147	61.3683	61.1024	40.7442	51.2205	49.0031	46.6743	36.8123	34.4551	32.9848	29.4319	31.4576	33.9148	44.9284	49.2548	37.2547	31.9206	29.0845	16.5742	13.7931	12.7954	18.2557	20.0503
1120	0.05	8	1.49064	1.35863	1.54177	1.49349	1.54089	1.49089	30.895	6.66634	3.87223	3.07581	2.97506	3.07364	3.07215	2.77356	3.06991	2.96964	3.06785	2.9685	0.125035	0.124369	1.19997	1.06283	1.21229	1.26484	1.27538	1.18363	1.37339	1.39004	3.60215	2.95588	43.0084	42.6358	41.0571	18.9627	8.98887	9.11576	7.88072	8.69989	10.3756	11.4671	11.5916	8.98781	1.44484	1.49592	1.38428	5.29219	2.30537
182	1	0.9	198.434	508.733	223.408	125.934	108.186	99.9252	101.973	100.638	96.4918	99.1903	95.6753	98.9616	99.9363	108.821	124.664	108.327	54.1932	49.7538	49.9785	48.6899	46.3414	47.6518	76.6248	119.207	83.6971	452.564	408.012	488.086	160.075	111.897	106.542	102.974	98.9826	102.135	148.886	406.889	392.596	510.235	695.356	290.288	149.96	113.012	106.915	104.618	100.498	103.167	255.667
7311	0.15	8	19.6811	39.4939	61.9248	30.5419	22.1648	19.3859	15.7472	13.7127	11.6289	10.8024	9.59558	9.37344	8.74728	7.52989	8.47259	8.23867	8.99247	18.6913	16.9174	14.2648	11.5856	10.4874	27.4129	17.1567	26.2604	33.5992	26.5103	17.3845	70.0715	59.3078	25.1583	20.3985	16.7941	15.4159	13.0868	13.9032	18.838	54.2305	40.975	84.3843	35.8807	25.7311	18.6621	16.3815	13.881	12.7128	13.0093
1755	0.3	2	72.9945	89.0563	138.927	57.862	44.1961	33.9323	31.0171	27.1471	23.7671	22.7097	22.6571	29.2928	33.6342	123.445	56.7384	59.5539	40.2668	124.688	31.3748	26.4837	22.7791	21.5851	29.987	83.2016	161.95	118.799	58.931	61.5009	59.9023	46.2302	42.1045	41.6019	84.6187	37.8646	37.7271	126.005	84.2057	93.6345	56.7354	132.323	249.369	69.3627	47.9406	41.3327	35.5484	35.5903	125.802
1152	0.2	5	0	0	0	0	0	0	0	0	0	0	0	0	0	0	0	0	0	0	0	0	0	0	0	0	0	0	0	0	0	0	0	0	0	0	0	0	0	0	0	0	0	0	0	0	0	0	0
1192	0.15	3	253.662	319.543	245.821	261.46	267.632	194.436	150.02	126.895	113.023	115.442	112.632	120.14	120.427	114.771	132.908	126.426	118.783	228.396	154.886	109.148	93.5405	94.8014	106.863	112.388	124.834	177.903	164.801	130.959	120.134	95.8853	84.2079	74.8549	67.0541	68.3964	72.0348	397.141	218.447	353.012	241.782	183.317	161.467	137.189	118.521	99.8703	86.9833	86.2641	83.2415
541	0.15	0.9	31.1792	27.9752	30.7614	46.6121	1045.35	534.664	168.372	147.13	49.3534	48.3569	38.5319	33.9205	29.0574	19.5843	20.5574	221.819	328.742	156.842	43.0199	24.8878	20.1911	21.8357	19.8149	19.3908	19.4041	14.2269	14.4764	80.6287	607.624	182.263	281.779	275.432	89.2741	34.3823	40.6728	25.9321	25.6338	22.966	25.3175	25.3982	739.36	433.241	131.196	107.614	40.0335	39.4205	34.7814
1822	0.15	0.45	5011.68	4050.62	8794.04	4293.68	2526.57	1714.74	1435.99	1246.14	1095.23	1062.53	1031.36	1237.61	1341.34	4252.36	2767.54	3106.39	1418.4	1547.76	827.471	656.576	530.759	495.869	445.261	1158.46	5309.77	6290.19	4804.62	2054.17	1695.56	1446.61	1303.36	1280.19	1156.5	1101.05	1392.74	5618.5	3282.14	4809.91	3849.42	4866.41	3289.88	1960.44	1403.09	1182.77	1014.21	956.405	1164.03
972	0.1	3	113.054	176.364	514.284	366.156	152.433	115.783	90.3002	70.6384	52.9402	44.8435	38.8707	37.6189	13.9636	7.04538	8.26199	7.16116	78.7092	45.9359	32.8856	20.8062	11.6676	6.27572	6.6549	7.99844	8.14475	29.8304	54.1979	45.107	39.7387	42.1548	29.4141	20.2701	11.931	8.34364	5.68816	5.00093	5.09518	18.1204	63.9699	241.81	62.9779	47.4755	62.8674	49.7609	36.6349	32.1815	29.3624
613	0.45	1	138.271	247.824	305.718	650.461	1287.75	769.796	124.612	92.0999	83.454	121.693	153.165	148.646	130.603	112.331	197.955	352.549	303.457	130.079	26.0927	16.8405	16.3463	18.5129	27.7651	26.239	37.9474	66.1821	248.114	293.625	568.073	224.382	53.6648	42.2483	24.286	25.5404	57.1676	77.4397	73.0834	105.407	364.58	434.962	586.26	474.709	84.3123	61.1397	45.4626	39.8148	82.3888
1086	0.8	1	0.821058	0.741601	0.821058	0.676966	0.699531	0.676966	0.699531	0.699531	0.676966	0.699531	0.676966	0.699531	0.699531	0.631835	0.699531	0.565521	0.584372	0.565521	0.584372	0.584372	0.565521	0.584372	0.565521	0.584372	0.584372	0.52782	0.584372	0.461282	0.476658	0.461282	0.476658	0.476658	0.461282	0.476658	0.461282	0.476658	0.476658	0.43053	0.476658	0.383702	0.396493	0.383702	0.396493	0.396493	0.383702	0.396493	0.383702
1295	0.15	10	69.2268	68.6611	43.2034	31.7566	35.3636	20.9566	15.663	11.4356	9.79728	9.60118	11.3762	15.8642	24.8881	30.3777	20.7069	15.555	25.6465	74.313	31.1498	18.3991	16.0825	18.994	93.7804	28.5374	36.8284	30.1231	36.91	76.2205	82.8671	31.9547	24.3589	18.0954	13.1616	15.065	119.755	132.921	68.6863	135.794	115.915	34.0916	102.347	27.8278	24.0328	21.6004	20.1367	16.1074	14.5163
1139	0.15	8	7.33428	9.11564	7.73823	7.00599	7.45937	6.51897	5.98317	5.82939	24.6994	10.4502	16.7227	21.1986	9.08178	17.0685	20.364	11.1806	10.7432	11.5133	10.6351	9.83693	9.03503	60.4523	14.4326	12.6083	14.581	14.8297	15.5321	11.9884	49.3134	39.6585	22.4755	19.8091	17.4644	16.7413	15.4951	20.4506	23.0035	21.1935	20.7213	18.9671	17.1924	16.0644	11.3983	10.7385	9.93349	14.4867	14.7171
1862	0.6	1	771.762	487.7	1767.2	427.289	307.142	157.481	122.7	96.689	79.2784	119.639	148.036	131.971	124.262	785.886	249.868	267.835	106.89	165.724	78.9382	63.9524	49.7655	42.8974	35.2676	86.8315	964.752	1170.06	373.489	435.288	155.384	117.337	93.0515	92.3702	64.6209	84.3912	202.182	957.389	396.354	748.779	614.139	634.958	270.616	157.038	115.718	91.3764	79.7863	70.7639	455.669
629	0.2	0.9	2063.63	4384.31	3839.59	2108.89	3331.03	4763.88	2163.25	1765.61	1710.43	1767.51	1710.31	1766.86	1765.96	1594.2	1791.6	1642.45	1641.7	1628.71	1738.53	1585.35	1576.99	1627.17	1576.97	1635.22	1660.59	1504.85	1641.52	1566.87	1516.96	1506.69	1560.95	1467.68	1315.73	1360.72	1317.78	1533.19	1377.59	1318.54	1571.73	1280.94	1267.56	1217.05	1339.24	1613.26	1361.43	1486.57	1311.26
1000	0.15	3	17.8807	68.1408	51.4912	38.832	24.2147	18.9787	16.5804	11.6381	5.77621	11.9682	20.3747	36.5139	19.7401	48.4887	26.4975	18.6167	81.0085	96.4248	30.4651	23.4755	18.9217	24.0291	54.7819	49.2397	72.5567	73.4144	35.6363	25.9314	25.7647	45.2387	24.3974	27.6568	22.0738	19.2908	30.9697	154.685	34.1273	28.0358	27.597	146.635	49.0857	28.5507	24.7616	21.7337	18.9233	89.4361	95.5135
7306	1	10	7462.7	6263.31	15238.6	6851.22	4269.77	2540.24	2012.21	1697.31	1468.97	1602.47	1441.25	1656.11	1896.46	6051.61	4121.98	4321.16	2021.7	1964.69	1182.21	973.246	762.026	663.71	606.155	1862.52	9595.75	9052.13	6787.48	3709.18	2563.91	1996.51	1766.47	1677.73	1475.46	1363.6	1436.22	8950.78	5290.74	7300.36	5788.34	8007.59	6595.59	3010.9	2031.39	1632.1	1349.47	1226.96	1958.88
991	0.25	3	77.5673	145.592	188.687	126.437	75.852	54.5382	39.5193	30.2305	22.5753	19.29	15.6676	22.9671	15.0418	15.7339	26.344	18.5784	49.3584	55.8361	43.0849	51.8503	36.2469	38.8185	149.963	108.155	82.2677	132.831	98.3738	62.7943	94.1147	171.405	75.6275	55.2713	40.9286	33.1094	25.8014	22.1759	20.0088	51.109	80.7545	336.378	117.533	95.9608	67.6152	47.7524	35.2749	31.4341	56.5861
7317	0.15	3	146.111	142.075	367.713	69.8447	68.9577	39.4737	35.9427	29.8501	24.6084	22.2891	19.2843	20.1949	25.6682	112.049	59.6972	50.7869	35.3465	29.7961	25.3277	20.9695	17.4437	15.55	14.7214	48.7796	323.698	154.875	91.2245	64.5864	41.496	33.7195	29.2677	27.4825	25.8457	22.8086	34.4083	254.023	90.0326	154.599	64.7448	219.796	235.261	51.1706	40.8677	34.5805	28.4589	25.5037	117.057
998	0.45	1	199.623	172.213	168.904	362.127	470.772	338.299	187.15	180.796	178.223	180.192	166.672	165.408	159.077	139.401	173.469	151.901	146.653	73.9794	7.03713	0.999197	0.969732	21.8637	33.4623	30.9244	29.7204	28.9203	39.1072	27.7337	14.8439	25.3558	56.765	60.4323	61.1665	62.9159	60.4954	60.072	54.9617	39.2089	89.3091	166.732	99.9934	85.5309	123.664	126.166	121.745	127.82	119.518
1716	0.2	2	71.0473	96.963	189.611	75.6119	47.7632	35.1541	31.428	25.2737	20.8803	19.8481	19.8261	38.9514	32.4658	118.931	42.6659	37.8388	197.124	71.5893	40.1673	34.1959	28.1975	25.0058	23.0038	58.0299	248.484	275.083	105.413	66.4148	47.581	49.7673	38.6368	30.9285	27.6925	27.0686	26.6739	525.881	94.0265	95.9406	108.549	268.996	297.964	108.652	54.1056	47.2109	41.1236	174.943	291.166
1896	0.3	0.55	582.961	495.286	1078.31	546.789	377.549	275.465	240.493	214.276	207.768	244.003	210.904	202.026	180.329	580.201	331.23	272.56	238.895	228.799	204.524	207.48	177.301	175.043	121.111	169.877	495.251	667.739	399.838	485.792	280.923	247.211	231.097	221.257	172.897	203.315	173.565	516.627	418.143	449.978	545.096	431.605	336.191	274.383	248.849	233.793	268.899	209.506	293.777
1883	0.05	4	276.567	204.627	478.754	117.434	83.0837	55.7161	43.6105	34.0777	27.5665	26.0753	30.3483	37.9598	31.7161	297.988	83.3816	52.6502	34.3638	26.3896	17.0486	18.3226	10.5403	9.53728	7.64039	36.3136	320.498	312.923	121.635	122.713	64.8959	48.1853	37.9714	31.0412	23.4907	21.6262	20.3274	126.772	195.747	272.57	273.644	254.753	80.126	57.7019	45.271	36.2649	30.1417	24.0377	56.6779
1285	0.05	9	4.31732	4.59396	6.27373	9.33734	39.2481	10.2798	4.3329	3.51951	2.68598	2.30692	2.28692	13.9102	7.76483	11.3531	15.5781	8.04225	7.32625	100.182	17.7224	15.3354	14.2605	14.5738	14.6991	14.0648	9.87599	5.139	4.72881	5.42777	18.0764	6.48689	4.15626	3.34141	2.51943	2.05068	1.66733	3.26971	11.4399	37.9788	29.783	8.27581	11.6762	6.15611	13.2814	12.409	11.1663	10.856	9.39219
1266	0.15	8	15.4028	22.4843	18.3413	16.9215	24.6493	15.1732	13.4255	11.8278	9.87279	9.00863	7.80668	7.38543	6.78982	6.00442	7.39726	7.60772	7.99991	8.37644	10.2341	9.48702	8.32692	7.95198	8.1991	8.65996	8.54542	8.37662	9.7778	10.1662	14.6083	11.9331	10.8475	9.10763	7.42793	6.67805	5.91523	30.4936	19.344	70.2208	40.3451	19.4678	41.1856	15.8263	13.4796	12.2962	10.5486	9.51441	8.12899
1176	0.05	4	31.2949	13.9007	3.11908	3.04334	8.02006	18.8751	28.9215	24.9878	223.121	46.1814	158.376	104.929	18.5384	17.5791	42.7539	21.1136	20.1189	25.5492	65.219	56.1248	45.902	79.169	30.6601	12.9816	16.2562	21.3493	17.2222	10.5385	137.423	154.059	70.8454	57.562	33.2623	20.3347	13.5468	11.2536	36.5042	78.924	32.7481	19.3308	23.5759	34.9961	38.6638	31.9159	15.0961	112.976	56.9016
924	0.2	3	15.6097	23.0492	42.4693	28.2595	18.5779	29.9497	17.3988	16.5119	25.4945	21.9587	19.4883	50.2239	25.209	47.1258	26.0199	29.6849	22.7746	25.5449	94.7287	22.9683	18.3209	17.0755	22.1808	19.7221	16.4391	88.1156	88.5912	42.6288	59.707	52.7888	70.4001	38.4902	37.1945	36.8084	50.1235	69.9526	44.1632	63.131	60.3459	84.1629	39.3366	31.1867	28.1938	25.8757	24.1254	24.6788	92.3717
758	0.05	4	90.5058	81.5884	88.8808	82.5052	79.2261	64.0287	63.5128	62.685	61.8693	64.6749	63.8924	67.2184	67.6284	61.2068	67.1502	64.9551	66.1723	40.4415	41.7152	41.2485	41.1197	49.0784	50.5905	54.4371	56.7372	51.2518	56.182	55.0356	55.4994	73.7971	75.6966	73.3927	68.9701	77.2799	79.2947	82.8112	83.8432	74.1119	80.0885	74.1869	71.0554	60.8389	62.5616	59.4699	56.7873	61.1943	61.6485
1257	0.4	9	0	0	0	0	0	0	0	0	0	0	0	0	0	0	0	0	0	0	0	0	0	0	0	0	0	0	0	0	0	0	0	0	0	0	0	0	0	0	0	0	0	0	0	0	0	0	0
895	0.15	1	2941.42	2673	3023.88	3137.29	3063.83	2897.05	2890.13	2414.61	2218.7	2299.12	2229.57	2303.22	2299.43	2074.7	2292.83	2220.41	2283.45	2189.8	2255.85	2041.75	1926.3	1995.01	1933.57	2002.64	2003.27	1938.15	2100.74	2194.39	2277.21	2344.89	2235.81	2368.44	2334.26	2463.36	2432.46	2479.47	2528.75	2290.82	2738.59	3249.76	3455.54	2895.99	2826.34	2795.74	2646.22	2693.38	2581.28
1317	0.5	6	3.46119	3.45276	3.89057	4.22272	58.4895	13.4455	4.46557	221.552	26.6908	21.2945	13.6352	26.579	12.3362	8.40326	7.48244	6.59845	18.3911	79.3315	32.0703	19.1361	18.4462	46.4793	22.79	13.0829	12.8792	11.4961	14.7744	10.9468	10.9367	9.64486	9.27031	7.66551	6.72719	7.33181	6.86021	7.57231	4.75296	3.63681	3.68859	3.20035	2.4927	2.33708	5.99752	3.96061	3.0325	3.94136	5.39564
1242	0.25	7	10.5192	9.68458	9.76239	5.94141	5.54134	5.08648	4.5412	0.608819	312.351	174.94	45.8784	49.3594	47.6559	39.0939	37.4768	32.6695	18.9918	7.87388	7.46402	23.1067	48.7269	17.4066	15.5872	14.9986	16.9134	11.0425	9.26515	4.49532	2.02712	0.298384	0.274507	0.248947	0.229239	0.222992	0.228502	5.66905	149.509	98.6921	24.6553	34.2767	4.73673	3.02995	0.673207	0.227068	0.206286	4.42388	18.5693
107	0.4	3	203.164	88.5246	110.761	58.9513	30.8636	21.6707	17.7758	14.5623	11.7052	10.1079	9.54373	67.9669	67.7957	96.6911	67.7606	33.592	23.7122	16.5516	13.6408	11.3663	9.27167	8.19061	57.8246	372.191	186.509	221.619	129.453	84.2083	39.0913	28.9506	23.4214	18.6387	14.5403	12.2153	16.6528	211.419	139.902	266.713	203.218	62.4423	50.4986	29.5314	23.8449	18.9679	14.8384	12.5002	41.9646
1841	0.15	2	155.403	162.068	422.726	131.222	76.6402	46.5491	38.8889	32.0719	27.4584	24.4976	25.2839	21.7444	17.2575	153.469	77.9203	76.3626	26.2007	30.7668	13.7149	11.3583	8.02262	6.56053	6.20132	41.4086	258.759	271.028	91.2089	66.8419	44.3418	34.5006	29.9568	27.335	22.3303	21.4674	50.9385	229.347	89.0363	127.691	94.5496	123.073	97.0982	48.1966	34.6998	27.4767	22.4727	19.3231	37.6859
907	0.3	0.55	263.394	216.412	284.471	244.627	164.146	124.822	81.5076	68.2463	87.2348	83.7976	74.1876	70.7801	63.8658	74.3247	82.4628	99.65	78.0483	65.0372	72.203	75.0652	72.8581	72.9003	78.901	67.7125	64.001	132.763	451.603	322.085	354.857	320.631	280.175	209.851	176.209	169.082	233.514	388.282	290.389	425.96	598.592	775.984	508.857	312.204	296.325	213.742	179.178	243.73	432.617
80	0.5	0.4	400.559	313.659	340.981	231.425	69.7806	61.0001	19.1287	16.6023	19.5726	21.2429	113.293	319.275	62.9444	232.159	137.039	197.471	229.735	246.615	161.656	153.333	99.1581	98.792	166.211	545.367	356.107	484.788	367.921	355.147	119.099	95.4849	65.2354	59.0055	72.3893	117.329	166.999	337.714	348.293	377.431	428.557	166.779	241.993	208.429	205.759	162.307	104.378	30.0145	302.5
1236	0.05	7	2.30197	2.21689	2.33263	1.97739	3.29602	2.70207	2.36013	1.3489	1.58308	1.0215	1.27851	5.11215	5.84805	5.00534	8.88961	9.06476	7.21479	7.43043	3.26125	2.61941	2.05603	16.2101	5.79421	5.57048	4.99108	4.95085	5.83537	5.31114	5.49508	9.54438	27.3977	26.4549	20.1961	7.449	5.80576	5.11142	5.08201	5.65873	8.25724	9.25319	9.24604	8.23669	2.98948	2.52991	1.89462	1.61425	1.34932
981	0.05	3	123.295	137.805	291.668	467.384	172.47	124.945	118.808	116.391	109.469	111.523	106.798	106.449	105.815	94.9063	105.23	101.483	111.596	84.4241	22.4907	15.5939	13.1271	12.3825	13.0787	15.2237	16.3235	31.7512	33.909	19.7772	23.1745	22.7929	38.1161	36.8651	34.1394	34.3435	32.6009	33.2365	33.3566	44.8187	54.775	78.7199	50.622	43.1632	74.894	72.8709	68.7495	70.2145	66.6934
1093	0.55	2	21.4648	27.6299	34.0486	30.6847	34.3491	27.5236	19.2606	13.7003	10.7184	13.2059	15.8179	25.8605	25.6107	45.0557	43.6095	35.2802	58.7481	80.4982	37.2612	29.5017	22.3377	21.0195	23.1757	24.1429	144.038	97.1645	71.2318	34.2767	78.1457	76.3213	39.86	31.6134	23.9837	21.2543	19.8362	148.36	48.9202	56.6518	57.2723	47.4789	181.909	39.9767	34.5717	25.8683	19.8607	18.4664	17.4551
1709	1	0.8	81.0063	67.6227	101.252	76.6742	61.4372	54.037	54.7429	52.2503	46.9906	47.0188	45.9736	48.3558	51.7608	65.7887	70.0733	63.9974	69.6328	69.1816	43.665	38.6169	36.3395	38.4893	36.2383	48.6162	67.683	83.6565	163.184	58.0966	44.9586	75.4804	60.2804	54.2933	49.3299	49.5726	52.1578	61.2885	60.521	69.7278	79.8159	79.9873	85.087	59.3041	54.4363	49.3478	45.4831	46.2887	48.1203
1017	0.05	2	23.0373	78.249	92.5858	32.9283	19.5073	9.18682	7.62914	5.88957	4.42453	3.61272	3.27938	3.19219	3.17961	19.8315	14.1204	8.89178	47.1527	58.8444	24.3074	9.18868	5.82965	5.65209	7.50575	9.56573	119.119	218.225	85.267	65.2301	23.8821	12.8868	9.69907	22.2299	28.3933	20.3714	46.8933	483.728	39.6062	31.842	45.9781	166.067	86.4955	92.7085	88.6727	47.998	10.2427	10.3986	95.3565
1194	0.15	8	12.5549	16.14	16.8892	14.4231	13.3467	11.2887	8.8956	7.44176	6.44961	12.466	10.9349	13.7287	12.4581	9.80092	12.3223	12.0958	11.598	10.7484	9.08978	7.59121	6.47355	127.18	33.1255	26.4736	22.29	27.0312	24.8939	19.8686	78.8603	43.6767	28.0563	21.8862	16.6524	14.0998	11.5579	10.7272	10.1801	9.47105	11.1786	11.3192	10.6986	9.86885	8.4524	7.10737	5.85578	5.34875	4.72084
[truncated: 433 more columns]

## Sheet: Storage(WG inflow-No Demand)
grand_id	a1	a3	1980-01	1980-02	1980-03	1980-04	1980-05	1980-06	1980-07	1980-08	1980-09	1980-10	1980-11	1980-12	1981-01	1981-02	1981-03	1981-04	1981-05	1981-06	1981-07	1981-08	1981-09	1981-10	1981-11	1981-12	1982-01	1982-02	1982-03	1982-04	1982-05	1982-06	1982-07	1982-08	1982-09	1982-10	1982-11	1982-12	1983-01	1983-02	1983-03	1983-04	1983-05	1983-06	1983-07	1983-08	1983-09	1983-10	1983-11
610	1	4	36620.3	36700	36700	36700	36700	36700	36692.3	36622.9	36570.2	36548.5	36547.5	36554.8	36555.3	36551	36588	36678.1	36597.6	36462.4	36271.5	35960.2	35672.4	35413.2	35174.8	34948.3	34728.5	34630	34687.1	34670.5	34398.5	34050.6	33683.7	33334	33051	32798.3	32577	32455.7	32445.3	32524.4	32785.4	33112.2	33062.7	32779.7	32476.6	32362.7	32339.9	32341.3	32355.7
753	0.9	2	27483.1	27573.4	27690.2	28034.8	28787.3	29291	29298.9	28794	28299.7	27943.4	27697.9	27448.5	27299.2	27141.3	26984.5	26891.8	26958.2	27993.7	28177.5	27740.5	27225.8	26838.8	26580.1	26319.3	26142.7	26000.7	25971.9	26888.2	28740.2	30055.5	30213.5	30012.1	29709.1	29666.9	29832.1	30005.6	30211.1	30220	30220	30220	30220	30220	30131.9	29661.8	29163.6	28870.7	28761.2
870	0.9	0.05	28199.3	28420.5	28615	28845	28939.3	28990.3	28830.2	28550.5	28296.7	28129.7	28099.6	28090.5	28072.4	28048.3	28053.6	28005.1	27852.4	27683.3	27366.2	26892.1	26346	25911.1	25528	25201.1	24860.3	24505.2	24213.1	25558.2	27843.8	29058.4	29110	29109.6	29109.5	29110	29110	29110	29110	29110	29110	29110	29110	29108.3	29064	29086.5	29110	29110	29110
597	1	3	22930	23175.6	24002.9	24622.2	25070	25070	24933.7	24417.5	23924.6	23570.9	23335.9	23115	22851.3	22521.4	22123.8	21764.4	21780.9	21732.2	21251.8	20592.5	19946	19389.8	18991.9	18683	18354.3	18035.2	17918.1	18057.3	18478.6	19103.7	19017.5	18542.7	18118.2	17846.2	17714.9	17662.5	17599.9	17605.6	17959.5	18710.1	19489.6	20962.8	21485.5	21246.1	20906.3	20678.7	20546.3
307	1	5	14276	14140.3	14057.6	14122.7	14240.2	14290.8	14218.1	13815.8	13549	13441.3	13423.2	13412.5	13409.7	13398.8	13473.2	13780.4	14434.8	16130.5	16226.1	15879.3	15555.6	15427.7	15441.8	15476	15506.3	15542	15941.5	17034.8	18236.3	20020.3	20959.9	20834.8	20645.1	20591.2	20654.3	20740.5	20868	20971	21081.6	21221.2	21319.4	21324	21027	20540.3	20058.2	19823.9	19707.2
1753	0.15	5	6215.75	6238.54	6260.78	6281.39	6228.88	6154.91	6093.43	6000.14	5943.06	5935.96	5946.53	5975.01	5973.54	6012.3	6020.65	6017.18	5996.8	6045.35	5996.25	5945.04	5916.3	5880.72	5873.4	5890.5	5950.48	6023.19	6046.03	6051.26	5998.57	5931.35	5871.87	5809.09	5851.82	5825.65	5805.55	5920.34	5985.4	6015.9	6011.79	6052.03	6150.54	6129.31	6049.16	5935.51	5837.06	5804.41	5862.75
297	0.35	0.95	1109.32	695.663	711.815	739.916	1125.63	1361.22	788.078	987.804	1526.97	1919.81	2279.48	2515.43	2900.25	3201.36	3523.71	3866.01	4990.4	6827.36	7434.2	6841.72	5620.4	4462.38	3177.34	1854.65	781.874	720.87	714.488	711.164	711.253	775.809	722.779	870.149	1260.12	1713.27	1905.87	1971.95	2041.74	2081.59	2230.64	2441.1	3158.19	4178.11	5087.81	5004.71	4266.39	3383.28	2680.62
1036	0.4	2	1426.08	1467.34	1515.19	1573.91	1595.18	1594.5	1557.97	1512.23	1470.04	1439.14	1412.52	1393.34	1362.93	1348.91	1335.16	1310.45	1296.96	1300.81	1291.07	1278.37	1260.13	1241.16	1253.16	1246.83	1256.13	1391.91	1442.37	1432.33	1418.21	1440.52	1487.42	1524.65	1562.02	1592.9	1633.41	1917.04	2048.72	2117.05	2166.17	2241.27	2382.63	2411.06	2390.45	2352.86	2316.19	2290.69	2326.1
989	0.65	2	3306.17	3292.59	3330.91	3393.36	3375.05	3333.35	3274.92	3222	3176.02	3125.56	3087.93	3053.66	3014.49	2982.73	2959.3	2921.4	2906.85	2987.81	3109.14	3111.78	3091.07	3068.48	3101.45	3118.88	3129.4	3210.44	3248.66	3259.09	3253.52	3323.93	3342.04	3329.87	3327.53	3298.61	3271.18	3328.85	3347.27	3352.73	3360.13	3544.27	3657.85	3684.31	3655.32	3602.76	3551.87	3523.15	3584.68
1135	0.25	3	1065.08	1045.38	1022.5	992.451	968.583	957.514	923.313	886.474	856.19	899.712	896.55	912.144	907.122	890.587	901.349	901.253	905.499	926.191	914.652	892.069	879.372	984.149	1127.86	1154.88	1155.87	1195.99	1219.96	1227.75	1287	1477.35	1541.08	1541.87	1517.3	1489.45	1468.26	1454.78	1433.81	1445.13	1474.22	1481.65	1481.97	1487.57	1468.04	1425.5	1380.47	1376.2	1490.36
1269	0.2	6	3273.1	3296.15	3293.68	3342.09	3340.47	3294.31	3201.31	3115.43	3021.51	2976.31	2968.14	2953.97	2924.97	2912.74	2884.23	2829.86	2796.26	2820.43	2806.55	2719.68	2699.26	2653.83	2638.28	2618.97	2615.72	2624.85	2627.49	2633.88	2658.56	2601.19	2559.13	2520.67	2460.74	2451.14	2466.42	2582.61	2680.03	2743.26	2791.94	2802.25	2805.12	2823.34	2780.86	2749.63	2709.99	2666.17	2646.94
1077	0.1	3	468.374	469.099	466.787	467.54	486.181	511.969	490.792	468.063	471.447	472.268	470.203	470.77	469.985	469.945	472.781	469.11	480.052	476.916	471.111	474.14	470.46	499.568	556.208	561.824	550.553	616.638	629.057	619.605	647.508	760.37	760.804	729.161	685.469	646.115	616.744	616.584	592.286	591.344	599.4	594.843	608.895	614.764	594.349	557.328	520.025	512.67	550.933
1026	0.4	2	865.538	891.374	929.623	972.598	966.592	957.044	941.118	909.171	877.805	848.306	829.862	838.808	824.812	831.832	842.859	835.385	846.906	895.558	914.741	918.928	917.555	911.339	974.752	982.663	998.292	1181.07	1254.09	1250.23	1232.48	1219.22	1192.51	1159.21	1143.3	1104.3	1076.47	1366.11	1429.1	1454.51	1442.89	1468.83	1583.96	1575.48	1532.94	1476.36	1417.96	1380.88	1399.39
740	0.05	0.05	942.282	950.773	942.722	906.891	836.407	782.216	757.201	783.294	869.026	886.332	903.935	910.572	896.623	879.328	851.188	829.363	800.53	861.767	910.317	908.91	937.044	1006.39	1008.06	1023.57	1050.96	1064.95	1048.9	1031.9	1010.56	999.552	1008.71	1016.15	1002.34	1099.93	1118.91	1113.71	1099.39	1077.92	1076.8	1047.28	989.822	973.762	979.411	964.951	1044.45	1102.72	1109.34
1294	0.35	6	1900.77	1876.42	1850.7	1824.94	1800.74	1775.76	1746.93	1718.6	1694.18	1675.79	1656.83	1645.51	1629.96	1616.94	1612.16	1612.22	1607.05	1628.16	1642.71	1635.05	1628.76	1624.15	1624.45	1619.53	1612.56	1606.66	1599.7	1588.78	1576.92	1561.89	1544.3	1525.44	1507.7	1491.78	1476.74	1463.24	1450.66	1444.94	1445.41	1443.43	1430.89	1420.06	1405.95	1390.76	1374.99	1360.68	1346.06
1848	0.2	0.05	398.343	378.83	597.734	853.812	759.922	626.374	479.907	370.274	357.885	359.132	429.027	502.967	394.084	454.656	417.602	425.909	370.827	385.499	372.445	370.778	371.075	370.632	370.963	375.038	567.502	796.739	919.59	1126.35	1095.79	885.085	660.188	441.059	365.425	361.466	375.571	887.803	1270.73	1339.34	1315.88	1388.76	1488.96	1467.33	1202.2	913.491	625.484	389.238	391.23
1869	0.45	3	2024.96	2064.89	2145.41	2312.8	2320.8	2275.11	2223.9	2163.64	2100.44	2056.17	2008.67	1965.28	1918.57	1891.33	1876.87	1845.35	1802.09	1764.11	1719.53	1665.32	1618.89	1574.76	1534.4	1496.96	1480.55	1501.68	1505.75	1539.56	1578.99	1546.58	1509.09	1472.59	1437.2	1406.76	1376.58	1544.33	1749.8	1857.47	1915.92	2004.99	2068.71	2112.11	2077.12	2026.3	1974.02	1929.35	1893.58
1863	0.7	3	2547.1	2649.73	2818.34	3014.11	2975.66	2935.48	2868.27	2778.73	2686.86	2619	2561.1	2502.12	2429.63	2462.59	2466.31	2414.74	2341.09	2282.55	2204.2	2126.03	2051.12	1972.44	1902.48	1843.12	1993.47	2194.92	2282.22	2269.79	2277.82	2222.8	2160.86	2100.57	2031.41	1974.73	1928.33	2013.65	2113.02	2221.07	2286.64	2405.28	2396.36	2355.29	2292.46	2219.29	2156.16	2090.35	2053.64
1770	0.45	3	1048.32	1126.62	1243.63	1358.84	1347.19	1310.49	1263.5	1210.17	1156.69	1102.31	1049.05	1002.75	960.259	992.073	1041.45	1042.02	1032.54	1032.19	1013.02	980.028	947.095	910.205	879.285	888.496	1002.22	1169.16	1286.96	1328.89	1306.3	1268.91	1221.68	1174.92	1130.85	1077.89	1029.78	1101.3	1174.86	1222.37	1245.61	1253.01	1276.85	1299.87	1263.13	1216.79	1170.59	1124.98	1083.37
965	0.15	5	347.303	349.821	363.859	438.956	455.231	453.634	436.355	414.385	394.915	375.088	357.514	339.494	320.878	302.467	287.09	277.81	280.465	278.336	279.027	286.177	292.3	295.477	299.163	311.826	317.687	335.837	390.918	438.023	491.119	573.114	595.061	583.701	568.131	549.152	527.759	506.246	487.923	480.036	486.083	583.941	607.636	619.849	624.233	599.545	572.371	546	524.144
1247	0.25	4	744.77	730.658	715.146	697.386	683.347	667.716	642.203	615.096	591.776	641.369	638.152	667.928	674.4	668.148	672.078	671.811	667.469	661.291	650.093	636.159	624.495	684.136	766.903	773.017	774.369	782.625	789.503	790.618	812.405	862.478	886.866	876.494	860.737	845.188	831.344	818.239	805.057	798.474	790.692	783.646	770.284	757.114	739.435	720.285	702.026	685.054	668.734
7313	0.4	2	611.742	610.884	617.426	635.273	669.084	728.36	691.845	589.728	530.087	517.406	518.154	520.403	522.626	523.22	539.253	559.114	609.102	678.141	630.875	518.434	429.726	399.977	399.186	403.216	411.323	418.869	471.072	555.352	648.638	718.237	691.085	593.568	525.788	518.383	522.958	532.073	546.913	558.881	595.771	645.118	680.11	686.623	658.234	582.329	521.335	507.304	515.667
1287	0.25	3	1232.86	1232.27	1223.83	1218.88	1206.64	1186.64	1155.62	1129.99	1107.14	1097.36	1087.07	1082.28	1073.18	1067.36	1056.44	1041.14	1035.17	1048.26	1051.29	1028.55	1020.32	1012.63	1029.12	1026.89	1021.93	1017.53	1013.95	1012	1020.74	1016.9	1007.67	989.874	970.344	966.76	968.767	987.688	994.978	1000.9	1011.71	1009.88	1009.6	1016.64	1005.61	999.768	994.507	982.102	973.722
1186	0.15	7	565.142	581.243	573.962	573.263	573.338	562.032	544.022	523.304	503.915	491.602	479.429	467.449	451.886	438.161	425.671	412.265	407.419	421.062	415.014	403.192	395.125	389.555	387.65	379.748	371.201	371.293	367.311	360.728	357.245	351.463	342.766	331.532	317.895	309.236	304.745	335.189	343.331	356.273	373.042	376.601	372.18	368.453	360.407	348.519	335.936	324.852	316.457
1042	0.25	4	248.205	268.809	293.925	321.552	321.154	313.309	298.554	280.797	261.196	246.075	244.165	244.197	244.565	246.34	245.656	245.891	249.275	266.783	266.106	258.552	248.228	246.317	247.014	245.693	260.769	397.78	463.037	463.247	450.477	442.223	422.891	395.642	369.121	341.767	320.745	555.192	646.906	649.079	640.691	663.326	703.868	684.461	650.425	605.229	559.967	529.173	586.562
884	0.05	0.95	190.365	173.111	156.033	193.951	198.245	182.703	158.915	230.76	251.455	276.182	305.828	332.164	356.547	379.022	400.383	427.14	448.713	471.66	493.78	459.9	365.7	278.831	205.179	198.888	197.499	201.174	197.007	199.622	200.914	194.371	200.373	194.257	175.668	220.57	197.546	173.977	212.1	186.008	183.215	213.98	194.513	170.018	206.01	179.372	192.374	204.027	185.031
1273	0.2	9	783.202	772.265	759.718	746.197	734.355	719.856	696.38	673.264	655.707	644.524	632.295	627.842	619.723	611.135	605.778	600.529	590.621	584.945	574.663	558.727	547.082	544.1	542.605	536.653	530.048	527.314	525.4	524.293	530.288	533.65	527.487	517.356	507.691	499.938	493.303	487.534	481.932	479.458	477.424	474.942	469.688	461.624	450.487	439.504	429.911	422.31	415.378
961	0.1	0.05	0	0	0	0	0	0	0	0	0	0	0	0	0	0	0	0	0	0	0	0	0	0	0	0	0	0	0	0	0	0	0	0	0	0	0	0	26.4568	69.8696	117.643	264.316	353.472	378.156	352.122	314.126	273.922	236.062	261.874
1144	0.1	1	230.815	238.227	235.833	236.051	236.044	229.68	219.664	221.081	223.959	245.02	241.918	242.506	233.727	226.754	223.142	215.283	213.266	228.423	225.655	213.353	216.997	233.64	251.355	246.559	237.699	252.628	255.59	251.848	249.115	277.106	277.996	261.752	239.292	222.672	209.684	241.189	256.682	252.177	255.749	248.105	242.514	233.946	230.778	215.23	217.61	217.424	215.044
616	0.05	0.65	191.284	187.713	287.923	262.569	199.173	246.396	216.065	193.035	195.64	189.454	195.247	188.905	195.517	190.795	192.601	192.815	190.382	191.605	190.71	197.031	194.615	192.385	192.884	198.044	195.678	193.151	192.639	195.556	192.793	192.329	195.175	200.583	197.082	199.405	199.387	197.999	199.001	197.575	197.236	199.666	198.96	199.388	198.394	199.534	201.227	199.908	198.235
911	0.25	0.7	217.493	216.361	214.004	235.941	218.682	209.697	211.429	214.35	213.311	214.085	213.985	214.159	214.443	215.842	215.006	214.097	214.442	214.991	214.915	214.813	214.809	215.049	214.581	214.522	214.516	233.961	386.142	541.569	673.77	835.057	845.225	763.948	666.125	560.471	477.62	469.636	438.213	425.352	585.293	844.101	952.27	968.793	963.914	880.067	769.595	648.511	564.243
1006	0.25	5	298.684	305.945	317.864	330.835	327.074	321.811	310.273	296.817	286.146	277.037	272.464	267.61	258.985	257.717	258.872	255.149	262.906	293.434	312.898	316.764	314.561	316.183	347.761	353.583	363.267	407.898	420.244	422.302	422.383	432.794	423.926	419.417	430.088	419.256	412.783	468.855	470.327	469.549	463.189	491.461	532.963	528.177	516.501	496.801	478.244	486.348	531.966
1048	0.15	0.7	196.588	192.071	189.914	218.242	198.929	184.714	236.926	297.093	346.995	390.58	430.933	470.052	505.691	538.635	573.22	606.612	635.462	666.332	586.075	410.156	242.412	200.116	195.232	196.047	198.121	192.969	194.94	196.357	203.271	222.105	218.329	225.094	215.362	201.221	199.862	200.246	200.805	204.262	212.775	310.544	359.132	424.847	422.236	357.017	283.786	222.126	196.949
1123	0.05	4	195.467	194.67	194.115	194.898	194.583	200.153	205.509	207.051	210.467	261.554	278.849	304.75	316.067	335.477	356.017	370.182	389.499	382.056	293.318	206.217	195.514	194.96	194.701	195.369	196.095	198.852	195.195	194.901	205.079	201.036	196.242	196.305	196.282	196.42	196.725	244.492	235.116	204.206	199.678	196.472	219.85	204.192	196.327	196.386	196.215	196.728	195.997
1032	0.35	2	301.424	300.911	306.676	324.864	330.062	324.079	309.153	293.463	283.133	272.639	262.423	253.111	240.412	229.342	221.307	213.704	210.904	211.531	205.632	201.836	194.073	194.667	206.8	209.836	208.266	223.981	229.085	229.566	240.908	289.474	296.761	292.073	286.214	280.297	275.234	278.972	284.935	301.898	315.255	350.97	378.677	392.835	387.57	372.838	361.171	362.897	373.459
1774	0.25	1	207.669	231.258	321.767	394.502	356.028	324.585	321.11	306.3	287.229	264.62	238.013	210.771	188.828	204.365	251.91	306.067	332.456	370.404	364.923	340.486	309.996	273.994	237.352	203.707	230.073	458.547	644.786	730.912	737.953	694.962	611.268	521.344	444.659	356.344	279.868	272.034	286.626	343.828	380.981	424.395	448.479	457.978	433.471	397.28	353.241	304.78	256.422
1781	0.25	0.85	200.754	218.906	305.715	443.731	454.676	436.318	395.353	341.756	286.6	229.115	188.793	187.295	186.708	223.114	284.002	333.426	322.67	323.501	298.761	262.477	223.576	190.733	188.804	188.208	226.054	421.981	578.992	638.532	624.689	565.61	489.675	416.651	336.402	249.877	188.374	206.944	236.265	322.913	432.938	573.712	616.419	590.895	527.394	452.287	372.004	288.828	209.005
355	0.65	2	501.921	503.03	506.821	527.873	593.456	626.951	558.534	452.232	402.783	383.853	383.834	394.533	401.84	405.8	415.223	447.68	521.234	594.418	540.61	437.463	367.111	340.995	330.971	332.864	337.784	341.198	349.663	373.173	419.279	460.97	424.425	329.621	273.202	259.236	265.648	283.823	305.669	325.426	355.748	401.938	531.247	643.988	624.092	533.965	474.482	468.878	479.959
1101	0.95	2	1504.58	1516.63	1572.11	1679.67	1685.46	1663.34	1630.88	1593.14	1553.36	1518.71	1492.05	1496.46	1482.1	1486.46	1485.83	1490.31	1472.03	1456.1	1436.62	1407.38	1377.92	1347.26	1318.84	1291.28	1276.22	1302.58	1325.81	1348.33	1350.53	1333.35	1308.7	1281.6	1253.39	1226.72	1202.09	1319.4	1464.01	1520.57	1531.35	1583.15	1647	1695.5	1669.12	1632.56	1593.93	1557.91	1527.16
1023	0.05	2	157.139	158.236	158.322	197.522	193.865	199.339	175.78	159.094	159.027	159.723	159.573	159.533	160.14	159.82	160.106	160.077	160.438	159.685	160.667	161.199	161.992	162.571	161.064	161.361	161.573	160.887	160.963	161.17	161.359	160.818	160.897	161.328	161.936	162.485	162.564	162.525	162.462	161.732	161.418	194.628	208.283	203.004	181.335	160.356	159.43	159.784	159.804
1060	0.25	4	280.54	278.487	279.709	282.827	276.779	270.196	259.313	247.239	238.219	234.109	229.28	230.366	226.388	225.391	228.304	227.275	231.336	237.942	234.871	233.399	230.483	228.777	241.292	242.429	242.905	270.135	273.685	271.054	268.183	271.445	267.994	259.116	250.701	243.949	240.281	287.72	295.41	304.28	302.93	301.809	318.77	319.483	311.153	300.026	290.26	284.06	282.592
1864	0.1	2	152.863	148.344	195.837	265.702	249.849	213.088	170.816	148.586	148.764	148.512	148.005	147.152	147.696	146.821	147.23	147.246	153.084	161.991	164.843	163.066	161.962	159.591	157.905	158.858	175.38	213.495	244.965	285.349	298.49	253.094	202.258	157.613	147.916	147.505	148.342	248.63	329.188	347.37	345.46	366.021	384.657	379.182	321.059	253.499	186.27	148.464	149.904
1797	0.6	2	1345.29	1360.27	1378.6	1394.19	1389.55	1376.19	1357.72	1339.03	1324.78	1318.96	1317.95	1324.86	1326.54	1341.21	1346.56	1349.3	1340.15	1338.63	1321.39	1309.34	1302.67	1294.74	1297.51	1307.44	1328.56	1354.01	1368.68	1369.88	1360.84	1349.33	1334.34	1333.98	1331.08	1325.21	1327.38	1353.04	1367.69	1381.22	1385.68	1399.06	1403.83	1397.76	1380.51	1361.05	1346.73	1340.41	1344.75
305	0.45	0.2	106.84	112.316	103.896	96.1504	87.3558	111.337	178.068	281.066	382.57	504.836	681.626	906.614	1164.22	1328.94	1424.7	1424.7	1424.7	1424.7	1262.3	868.044	478.667	184.364	108.101	94.2659	112.067	120.462	132.137	95.8397	88.3662	90.4572	236.735	316.011	370.965	512.368	688.055	898.618	1137.14	1326.32	1424.7	1424.7	1424.7	1424.7	1310.31	995.778	659.498	341.883	128.104
968	0.05	7	140.575	140.28	140.338	158.305	171.106	172.017	166.807	160.908	155.343	149.445	144.786	140.428	140.024	139.982	139.942	139.927	143.526	143.565	141.126	141.273	140.528	140.268	140.434	140.09	140.196	139.788	140.195	139.911	141.214	144.934	145.51	141.452	140.572	140.434	140.504	140.496	140.47	140.466	140.668	147.52	146.012	147.5	145.789	140.681	140.011	140.736	140.397
1019	0.15	5	139.604	145.987	167.228	186.213	180.059	169.426	157.657	144.77	139.658	139.648	139.605	139.674	139.613	140.257	140.943	139.56	144.143	169.264	167.748	161.41	152.305	142.181	139.696	139.666	144.828	193.618	243.559	249.549	243.58	232.016	215.347	197.229	180.401	162.384	144.626	219.329	278.156	281.699	279.927	310.434	363.383	349.215	322.385	292.988	263.5	234.987	211.542
1302	0.8	10	1393	1393	1393	1393	1393	1392.77	1391.32	1390.87	1392.59	1393	1393	1393	1393	1393	1393	1393	1393	1393	1392.93	1392.89	1393	1393	1393	1393	1393	1393	1393	1393	1393	1392.38	1391.22	1390.34	1390.19	1392.06	1393	1393	1393	1393	1393	1393	1392.98	1392.9	1392.67	1392.53	1392.58	1393	1393
1824	0.1	0.5	88.8383	98.1717	126.052	167.016	161.212	149.928	133.617	110.58	106.022	117.206	103.11	93.7159	123.391	129.798	133.008	132.14	124.088	121.334	120.56	110.286	125.192	127.902	122.555	120.086	145.198	183.713	203.863	217.756	210.479	191.439	165.958	147.304	126.035	105.992	123.182	153.723	178.557	197.122	200.467	218.818	233.701	234.942	201.435	164.813	131.888	106.231	123.873
1316	1	0.05	0	0	0	0	0	0	0	0	0	0	0	0	8.4067	21.5776	42.3583	72.369	136.708	204.171	275.018	274.323	274.438	274.116	285.832	285.399	280.316	273.704	268.581	258.415	248.335	237.074	226.199	214.968	204.857	196.566	189.551	181.734	174.132	168.424	163.093	157.393	151.55	146.685	141.617	134.984	130.31	127.451	126.618
1835	0.2	0.45	97.3595	115.982	161.024	219.366	222.814	213.248	190.351	166.763	142.328	130.049	110.95	97.7581	119.754	126.663	131.493	131.79	120.417	118.059	109.932	128.318	122.171	121.784	122.448	129.827	165.295	216.216	246.005	259.9	253.847	232.366	211.022	203.133	181.893	158.24	140.989	166.999	190.82	216.269	232.378	265.59	286.906	293.43	268.174	232.009	198.835	167.69	146.499
1847	0.05	0.95	101.128	108.583	137.65	176.248	176.684	164.022	142.779	121.664	109.444	122.773	112.856	105.111	89.4854	95.1864	96.3876	103.038	91.722	98.6386	113.24	123.022	127.095	117.343	119.717	138.299	166.493	197.806	209.997	219.43	221.014	204.981	187.069	169.51	148.894	136.289	125.884	146.647	151.754	159.89	165.197	175.029	178.501	179.08	164.947	143.841	126.185	111.637	104.637
1231	0.75	7	1035.13	1039.32	1038.47	1036.94	1033.91	1026.28	1015.43	1006.46	999.843	995.898	992.471	990.16	986.88	983.868	980.82	976.409	973.929	983.521	981.752	974.738	970.383	968.987	970.392	970.051	969.012	969.023	967.736	965.704	963.667	959.789	954.971	948.247	942.062	937.903	936.638	948.706	950.901	952.857	957.696	957.08	955.045	953.3	949.817	944.891	940.275	936.075	933.282
1140	0.1	0.05	158.118	152.94	146.927	140.474	135.499	131.497	128.26	128.178	128.172	128.281	128.08	128.661	127.919	127.707	128.129	127.953	128.175	128.28	128.371	129.099	129.512	129.699	129.527	129.107	128.625	128.417	128.299	128.071	130.717	137.014	142.816	138.892	134.656	130.1	128.025	128.085	128.801	143.527	143.791	140.892	136.424	132.802	129.242	128.207	128.036	180.694	281.819
1296	0.25	10	527.399	527.586	521.862	515.417	510.042	504.296	494.604	484.587	475.78	468.778	461.732	455.123	447.765	442.097	435.837	428.29	422.529	427.789	426.979	419.429	414.061	409.285	414.012	412.379	408.001	403.961	400.002	395.82	397.979	396.072	390.283	383.141	376.748	372.107	368.159	371.814	371.378	378.251	386.42	392.317	394.631	399.423	394.585	389.267	384.679	379.913	375.103
1659	0.1	3	117.308	124.546	128.68	124.991	125.023	133.004	142.542	151.075	157.801	161.234	163.261	166.506	170.756	203.267	230.689	253.895	304.695	301.439	230.844	158.208	133.274	125.139	124.931	125.008	127.685	162.275	260.378	251.067	195.753	155.832	132.647	125.848	125.847	125.756	126.372	163.525	166.216	162.866	160.912	188.67	207.705	204.391	176.316	138.839	125.602	130.149	141.706
1277	0.05	5	139.594	142.554	144.363	146.543	157.283	166.856	151.435	126.493	122.982	122.765	121.429	124.623	124.69	124.69	125.316	125.263	124.486	138.406	136.236	124.558	124.573	124.55	124.414	123.917	123.074	123.499	124.42	124.284	124.815	124.544	125.091	125.352	125.436	125.506	125.822	127.343	131.121	141.531	155.448	168.66	174.787	179.078	165.291	136.073	123.427	122.075	120.627
1021	0.05	6	122.526	126.899	129.156	139.799	142.036	139.838	132.646	123.061	121.574	121.798	121.77	122.001	121.805	121.88	122.013	121.821	122.822	122.469	122.352	121.893	122.559	122.893	129.538	126.613	122.108	130.65	131.946	128.901	134.931	146.859	146.183	139.234	129.704	122.248	121.62	121.673	121.825	121.88	127.663	152.85	152.767	155.526	150.541	139.342	132.154	127.37	122.898
1280	0.25	3	339.65	316.157	291.169	265.66	241.457	213.771	173.058	134.125	182.177	316.944	321.443	342.309	360.713	372.874	390.6	395.075	379.721	356.827	320.319	279.695	251.895	241.902	248.329	230.491	211.321	196.064	180.168	168.799	165.505	160.206	153.634	139.097	128.746	122.126	120.886	120.723	120.873	123.199	125.058	126.065	122.42	121.225	120.563	120.652	120.703	120.722	120.891
1120	0.05	8	125.805	130.681	134.825	138.96	143.926	147.701	132.677	114.88	114.704	114.207	114.131	114.613	113.88	112.832	112.541	111.64	111.511	111.914	112.387	114.464	115.701	116.961	118.088	118.346	118.426	119.778	121.414	123.492	140.626	188.959	190.455	165.777	137.298	115.671	114.635	114.616	114.562	114.614	114.625	114.615	114.641	114.548	116.193	117.942	119.205	148.926	205.952
182	1	0.9	795.069	1045.3	1098.25	1097.24	1074.57	993.787	890.689	796.926	715.904	636.223	556.709	480.406	401.056	393.923	443.52	517.136	501.389	457.541	391.155	334.268	299.742	269.315	300.006	583.506	1008.27	1094.5	1102.67	1102.7	1101.85	1078.21	1029.95	944.104	874.032	810.666	820.568	1074.41	1086.63	1100.61	1101.86	1099.13	1098.26	1090.88	1022.38	937.935	871.356	805.894	892.745
7311	0.15	8	223.767	220.008	218.833	219.983	214.917	208.845	201.507	194.072	187.06	181.156	176.112	171.369	166.194	161.189	156.286	151.134	146.49	143.238	140.136	136.604	132.261	128.781	127.563	127.192	125.23	126.55	126.866	125.864	127.101	136.552	137.688	135.12	132.049	129.238	127.057	125.06	123.389	125.531	128.433	138.097	140.485	140.27	137.187	132.549	129.555	127.567	125.766
1755	0.3	2	133.495	145.644	179.629	210.994	209.926	204.119	194.89	182.18	168.13	153.186	139.046	128.344	117.674	147.2	161.164	164.922	167.398	210.248	214.473	206.991	199.461	190.188	182.825	195.15	244.377	296.56	324.29	335.581	335.433	319.753	298.2	276.392	281.872	259.767	236.173	238.33	252.321	268.82	259.179	271.305	335.002	386.39	376.115	359.191	339.983	322.194	319.044
1152	0.2	5	0	0	0	0	0	0	0	0	0	0	0	0	0	0	0	0	0	0	0	0	0	0	0	0	0	0	0	0	0	0	0	0	0	0	0	0	0	0	0	0	0	0	0	0	0	0	0
1192	0.15	3	262.513	267.755	267.689	270.197	271.481	267.615	258.711	248.224	238.824	235.803	234.074	232.936	228.545	226.119	223.173	219.509	221.352	228.746	225.682	218.681	215.963	215.923	218.303	216.026	214.553	217.925	216.577	214.414	214.051	210.092	204.957	198.62	190.846	188.355	189.9	203.611	212.796	220.71	226.129	226.647	225.86	225.25	222.093	215.242	207.363	201.662	199.491
541	0.15	0.9	87.7341	88.3005	85.1594	79.048	259.43	360.237	232.636	130.689	89.4852	89.6847	89.9674	89.7733	90.0155	89.8202	90.1289	98.4293	179.175	142.877	91.1639	91.2838	91.2878	91.4823	91.3729	91.3704	91.3756	91.4119	91.4638	93.1305	352.987	560.368	461.61	233.92	90.2171	87.8663	87.2427	86.3757	85.8635	81.6474	75.2847	69.3107	142.061	267.69	173.408	109.576	90.2729	90.2868	90.2527
1822	0.15	0.45	77.3681	92.515	124.977	162.877	162.206	152.542	136.294	117.711	102.845	94.3807	82.5666	75.9114	63.1164	68.9985	74.1171	76.7381	72.8025	80.2606	75.7068	73.6715	79.0286	80.6822	83.5224	98.4494	122.278	162.541	191.187	199.173	189.201	171.03	151.191	146.554	135.359	119.846	109.055	129.867	141.496	152.75	157.613	171.312	176.146	171.688	153.668	133.618	113.374	95.7789	85.304
972	0.1	3	95.3103	93.2507	108.302	231.041	236.741	227.819	213.805	197.678	177.996	155.169	131.444	107.012	90.46	90.1531	90.2144	90.1366	90.7962	89.6136	90.0938	90.2926	90.3743	90.4814	90.5218	90.4525	90.4761	90.5408	91.235	91.8597	90.0703	90.1507	94.2705	99.3473	102.028	103.379	103.618	104.011	104.187	106.37	111.908	162.487	188.093	199.848	194.947	175.244	153.577	130.761	108.058
613	0.45	1	187.03	176.314	184.741	221.776	376.881	492.651	452.559	346.073	271.362	228.701	210.049	193.901	174.501	153.397	136.774	147.887	165.007	137.727	90.5028	88.4547	88.4505	88.4603	88.4966	88.5197	88.6202	90.1422	112.298	151.268	225.947	265.145	200.324	119.825	88.1916	88.2982	87.8708	87.4248	87.5355	88.0002	119.615	163.224	231.567	302.7	258.48	174.835	109.88	88.1022	87.4301
1086	0.8	1	438.513	435.732	432.798	429.425	424.885	417.066	405.448	393.494	384.4	377.674	373.349	370.549	367.531	364.567	361.806	358.486	353.932	346.749	337.621	328.32	316.248	308.043	304.735	302.248	299.774	297.484	295.203	292.236	286.819	277.216	263.553	242.851	230.043	225.028	222.879	221.45	220.414	227.185	237.71	247.634	244.498	235.325	223.574	212.684	203.909	197.693	196.022
1295	0.15	10	563.697	564.386	561.533	558.913	555.48	549.809	539.815	530.953	524.56	523.258	521.755	521.052	518.981	518.515	515.117	510.159	509.847	511.457	508.581	499.962	498.955	496.902	501.872	501.602	500.479	498.974	497.728	497.388	500.428	495.858	488.303	481.796	474.944	474.414	476.864	485.009	488.083	491.612	494.588	494.017	492.528	493.294	489.719	487.604	486.021	482.757	481.291
1139	0.15	8	136.865	134.731	131.245	125.917	121.077	115.618	107.269	99.6424	95.6136	114.814	118.18	132.052	132.87	132.01	149.481	151.345	151.998	153.84	148.767	141.653	135.675	162.609	186.47	185.973	182.766	184.821	186.538	184.697	200.945	233.155	250.401	243.5	234.968	226.563	217.898	212.362	210.243	209.297	205.57	200.9	193.08	185.217	174.999	165.014	155.258	151.095	148.981
1862	0.6	1	417.56	432.496	471.567	518.735	512.994	502.642	484.8	463.852	443.268	428.226	414.269	400.806	384.519	394.046	399.084	395.216	379.757	371.765	355.864	340.136	324.993	308.324	293.828	280.766	302.694	349.817	376.057	376.333	379.362	368.758	354.838	342.521	327.549	314.831	305.171	329.539	351.485	371.618	385.134	410.246	412.373	406.138	391.916	374.771	360.571	345.896	337.334
629	0.2	0.9	44.2724	51.8885	58.1907	35.9706	42.8715	3.84038	41.3179	49.4984	46.2327	44.1769	43.3222	43.0074	42.7187	41.471	35.2463	49.1765	46.8027	51.976	37.6121	72.1578	68.0657	68.0785	67.2406	67.9475	68.4233	68.8396	63.1725	38.041	53.5951	52.163	43.0416	69.8298	64.8277	59.2365	55.829	55.6249	53.9395	51.2978	45.0804	54.5292	58.8505	53.6546	56.7442	41.9674	41.6201	42.0199	40.5563
1000	0.15	3	80.0372	86.7469	94.1458	99.9039	97.3912	93.1786	87.4312	81.0241	79.9472	80.3732	80.2328	83.2486	80.6103	83.1156	85.9191	82.144	90.3313	112.629	121.708	119.142	114.306	110.006	115.083	118.212	121.814	141.124	147.462	146.528	142.685	145.296	137.62	128.79	122.511	112.432	103.605	134.774	133.315	128.364	120.601	143.525	151.762	145.296	135.725	124.295	113.873	113.196	133.921
7306	1	10	765.521	770.348	779.303	788.078	786.665	781.972	774.513	766.458	758.867	759.781	760.4	763.101	763.608	768.952	770.352	770.207	765.348	763.113	758.519	752.32	749.172	744.987	745.089	748.661	758.254	766.012	769.66	772.146	769.276	761.928	753.595	751.142	746.773	743.492	743.557	757.35	765.957	774.087	778.649	787.596	788.363	785.44	778.177	768.337	761.872	757.717	758.765
991	0.25	3	179.594	181.203	186.562	196.083	193.407	187.613	178.41	171.302	165.693	161.28	158.002	154.615	150.001	145.125	141.176	136.879	134.303	136.449	136.213	136.492	135.334	134.663	142.509	147.693	148.38	153.452	157.994	159.632	162.276	173.898	175.941	172.506	169.819	166.21	162.734	159.69	156.289	154.585	153.385	173.755	180.538	183.006	182.179	175.659	170.654	167.894	167.342
7317	0.15	3	123.371	128.941	144.925	157.423	155.691	152.338	147.336	140.004	133.483	127.72	122.35	118.51	113.413	115.931	115.198	114.67	111.851	110.908	107.704	104.095	100.779	96.2696	94.2799	94.2909	107.358	123.783	130.504	132.351	130.016	125.252	120.545	119.656	117.164	113.34	110.002	122.374	130.398	139.083	139.941	151.453	162.346	169.983	166.283	160.096	154.702	150.447	149.647
998	0.45	1	272.992	286.345	264.36	352.153	521.316	700.498	585.481	438.671	356.702	329.075	311.921	290.07	261.375	229.076	202.515	174.949	114.603	71.913	72.5817	68.2259	63.1029	70.1836	73.9146	74.0324	74.2472	78.7682	89.2027	92.3891	77.9035	73.1642	73.1987	73.0806	78.6528	104.485	139.369	172.347	203.742	220.117	257.139	356.451	439.81	449.883	367.597	242.809	167.382	141.411	136.397
1716	0.2	2	99.2664	102.237	114.499	127.202	125.441	121.889	118.605	112.345	106.889	102.661	100.542	100.704	95.8752	100.924	101.624	99.0892	107.73	127.65	125.692	123.176	119.324	113.689	111.254	108.963	121.156	156.355	174.264	176.878	172.719	172.25	164.832	153.063	146.666	141.02	133.404	173.298	195.414	201.197	200.388	210.992	252.935	257.818	241.701	220.895	203.058	200.663	217.03
1896	0.3	0.55	74.1431	75.3618	98.3119	145.415	139.409	164.798	170.47	170.12	166.529	176.729	181.588	184.944	182.181	220.992	267.929	286.992	271.553	244.34	206.529	167.284	129.499	89.1986	71.8815	71.2435	86.8247	135.89	156.261	151.146	172.496	171.315	166.525	163.281	148.742	138.552	129.319	154.798	207.776	236.857	269.583	320.892	317.68	288.478	248.695	206.136	171.887	132.381	96.9006
1883	0.05	4	75.5682	84.8184	95.6597	110.214	105.176	100.569	95.3523	87.2865	79.2349	77.5299	74.274	72.5655	72.1757	80.5703	85.2879	81.5804	76.8561	75.1405	72.7954	76.3677	73.161	73.5844	73.2847	75.6886	91.8049	103.611	106.981	106.236	107.676	104.623	98.9856	96.8155	90.2146	86.4171	82.5028	82.2612	91.6933	97.8184	104.448	115.921	113.925	107.495	100.743	92.6496	88.6523	81.437	78.3289
1285	0.05	9	69.025	69.0151	69.0048	69.0126	71.8294	70.2136	69.2397	69.6326	70.5331	72.1203	73.4612	77.1832	79.6945	83.0827	86.9862	90.0491	92.6606	110.595	115.127	106.779	99.4701	92.2284	85.1367	77.4487	70.1982	68.9736	69.0023	68.954	69.1082	68.9504	69.456	70.0859	70.7416	71.5349	72.8295	74.4719	76.2659	83.4467	91.4694	96.9576	99.627	102.528	99.5618	92.516	85.5121	78.6532	71.7336
1266	0.15	8	143.376	143.456	141.661	140.22	140.185	138.549	134.393	130.243	126.604	124.304	121.94	120.139	117.139	115.089	113.14	110.079	108.54	109.091	107.98	104.631	104.572	104.599	104.602	102.989	101.3	100.26	99.0679	98.7146	99.8292	98.7316	97.1066	94.7677	92.2727	90.8445	91.0717	95.5853	97.1049	104.452	114.483	117.99	121.02	125.115	123.165	122.354	121.752	120.059	118.397
1176	0.05	4	93.6192	69.706	65.6421	63.377	65.0139	67.7547	69.2061	71.8033	77.5483	127.699	141.198	175.01	182.039	184.297	191.327	194.765	198.17	201.791	185.672	152.537	120.365	93.9719	72.2102	67.8174	67.8053	67.5983	67.6989	67.8417	70.2976	70.21	74.1816	69.5172	67.8302	68.062	68.2009	68.2071	68.1412	72.8639	68.4737	68.0963	68.2083	67.8503	67.8604	67.8912	68.0999	72.5361	83.7402
924	0.2	3	121.718	118.117	120.822	127.429	122.211	126.05	121.728	117.008	120.018	114.841	114.056	120.275	123.869	125.435	132.71	132.795	131.873	130.01	145.602	166.208	160.622	154.632	151.39	148.694	143.99	150.075	186.755	204.767	212.875	225.23	228.81	230.273	224.592	215.772	213.004	223.835	220.376	222.194	224.092	247.661	241.809	229.79	213.361	193.411	177.751	163.762	164.359
758	0.05	4	122.505	123.932	123.839	119.168	104.622	96.3746	95.2572	101.559	116.661	118.373	120.032	119.691	115.433	111.731	106.804	109.898	110.209	120.714	134.58	134.102	139.771	161.44	161.571	159.389	160.766	158.681	157.962	164.072	161.538	154.349	152.043	144.761	133.556	148.224	153.405	146.852	142.947	134.835	127.777	117.904	104.259	106.165	121.386	117.53	118.423	129.309	134.539
1257	0.4	9	0	0	0	0	0	0	0	0	0	0	0	0	0	0	0	0	0	0	0	0	0	0	0	0	0	0	0	0	0	0	0	0	0	0	0	0	0	0	0	0	0	0	0	0	0	0	0
895	0.15	1	208.942	206.825	203.884	201.72	195.93	190.02	180.245	172.828	171.213	167.891	166.85	164.614	161.923	160.084	157.312	155.088	151.442	148.001	143.98	140.258	137.316	135.269	134.176	135.668	135.959	135.663	134.168	133.588	133.582	136.753	133.122	126.716	123.156	126.482	128.525	129.64	132.187	132.077	133.092	138.057	139.132	138.016	137.944	132.124	126.58	124.683	125.77
1317	0.5	6	415.849	415.812	409.503	402.807	396.461	389.759	376.886	382.353	385.751	382.243	378.393	378.623	377.144	376.3	373.198	366.403	366.345	374.078	374.359	365.76	364.259	360.111	364.328	361.432	357.812	355.372	354.861	349.412	346.859	338.901	326.618	316.377	307.603	302.535	302.851	301.345	298.774	298.274	297	292.494	284.438	278.501	279.351	275.263	269.726	271.57	272.603
1242	0.25	7	160.044	155.813	150.754	144.65	135.78	117.777	83.7712	63.5784	69.0796	151.691	157.165	160.507	163.826	165.97	166.593	165.685	160.548	143.142	115.949	92.4217	84.484	80.7196	77.6922	75.2664	72.8873	71.8269	70.4204	68.0352	64.67	63.3737	63.1463	62.3331	61.1545	60.8646	60.3087	62.3413	77.7109	100.222	107.849	108.351	103.83	87.2535	63.6849	61.4216	59.7188	60.4574	63.4656
107	0.4	3	197.727	202.716	207.419	209.52	208.124	204.536	195.971	184.756	176.092	170.541	167.009	166.538	167.045	170.57	173.779	174.154	172.187	168.201	159.461	148.396	139.835	135.694	134.618	151.657	170.531	184.057	197.725	203.126	202.387	197.724	189.713	179.689	172.287	168.347	165.639	172.427	182.431	196.361	209.213	219.699	219.366	215.259	208.137	198.954	191.814	187.003	184.686
1841	0.15	2	62.589	71.9164	101.674	129.218	128.169	122.774	113.651	103.171	92.2268	81.9	70.777	60.7797	57.921	65.5129	66.8463	66.965	61.1938	59.9523	58.013	58.0716	58.0813	58.1209	58.1523	58.5932	77.9284	116.04	135.141	138.442	135.095	124.767	113.181	101.879	89.5563	77.1437	65.5903	76.9876	83.4819	86.3535	85.5405	88.4229	90.0051	92.1579	88.1065	82.2275	76.0035	69.2373	63.0611
907	0.3	0.55	56.3747	55.3848	60.65	64.2827	54.7334	53.9692	56.2207	57.5711	60.6701	65.1767	67.9767	69.2853	68.8713	68.1876	73.6602	78.6482	83.6561	84.1722	80.8178	74.4527	69.0425	63.2286	58.0547	55.5268	55.7416	58.7895	103.951	171.423	220.266	278.387	289.23	260.896	222.343	179.628	144.903	141.653	126.703	120.483	153.168	252.829	299.142	305.463	292.608	262.895	223.584	188.478	171.704
80	0.5	0.4	142.323	105.868	89.1547	54.4547	67.5545	97.9671	107.135	105.224	104.31	104.886	134.255	239.412	342.898	415.03	507.764	560.456	513.405	435.421	320.978	183.223	66.2529	49.4157	52.7857	133.601	112.982	146.805	201.282	185.017	170.222	158.717	138.106	102.101	70.0873	59.1535	82.0914	186.465	323.976	435.311	550.516	558.99	518.358	421.647	325.422	195.625	77.0332	52.2474	53.2879
1236	0.05	7	53.2266	53.2316	53.198	53.2079	53.1893	53.2063	53.2037	53.2557	53.2355	53.3488	53.3111	53.2254	53.1757	53.168	53.1586	53.1349	53.1366	53.0907	53.2987	53.3255	53.3582	64.1147	76.4441	82.2004	87.3113	92.2836	97.7708	103.229	108.175	112.747	104.774	79.9569	58.2652	52.9417	52.9556	52.9731	52.9715	52.9766	52.977	52.9482	52.9121	52.9106	53.2801	53.3284	53.3468	53.6931	54.0493
981	0.05	3	50.6807	51.9493	51.0535	66.4453	68.0997	66.3699	63.3343	60.5106	57.6974	54.7807	52.1149	51.4135	51.4601	51.4685	51.5069	51.3593	52.3383	52.3157	52.9952	53.0295	53.04	53.0777	53.1264	53.0669	53.0202	52.9584	52.8204	52.9717	52.8732	52.9076	54.5076	56.371	58.0997	59.7079	61.2258	62.895	64.5692	66.8593	69.0053	73.2313	75.899	78.1322	75.6757	69.2188	63.1522	57.4314	52.7102
1093	0.55	2	159.088	158.171	157.643	157.129	157.383	156.884	153.967	149.334	144.814	144.296	142.786	141.957	140.986	141.899	145.444	146.561	149.531	159.854	162.49	162.654	161.399	160.587	161.407	160.807	160.847	185.489	195.616	197.221	200.038	211.464	212.056	209.706	205.79	202.075	199.822	210.722	220.513	222.494	225.412	226.294	243.885	249.012	246.085	240.395	233.778	228.208	223.928
1709	1	0.8	327.445	353.522	416.754	468.637	485.267	479.755	463.527	442.804	417.112	385.805	352.977	323.55	293.817	291.533	310.119	324.371	332.316	385.479	398.059	390.288	375.929	360.059	346.997	342.497	365.935	460.405	507.441	509.633	506.802	506.997	496.703	476.743	448.131	414.587	382.836	367.17	352.519	363.028	384.736	421.123	463.45	480.532	468.459	447.109	418.009	386.159	356.8
1017	0.05	2	50.1768	50.7475	50.406	50.015	50.1039	50.9266	51.4629	51.9691	52.3219	52.4691	52.5875	52.7359	52.4211	54.124	56.5664	57.8589	60.779	60.562	50.1832	50.3408	50.4588	50.5321	50.4377	50.2537	51.2932	63.3105	70.4106	58.8573	50.2471	51.4897	52.9354	54.446	60.7488	64.2411	67.5841	123.1	161.856	169.196	175.719	191.889	217.638	187.156	118.565	57.5482	49.4265	49.5389	49.1966
1194	0.15	8	128.142	126.356	124.335	122.207	120.151	116.328	110.33	104.218	99.5425	97.8258	96.2082	94.9491	93.4651	91.8481	90.6191	89.2364	87.9369	86.3318	82.8808	78.7459	76.1747	80.4395	87.1546	87.7669	87.719	88.5091	88.8798	88.8722	91.9246	95.9429	96.5724	94.5021	91.8648	90.0904	89.0486	88.215	86.9759	85.7965	84.6909	83.4103	82.0399	80.554	77.7927	74.9929	72.7813	71.2521	70.0309
[truncated: 433 more columns]

## Sheet: Outflow(WG inflow-With Demand)
grand_id	a1	a2	a3	1980-01	1980-02	1980-03	1980-04	1980-05	1980-06	1980-07	1980-08	1980-09	1980-10	1980-11	1980-12	1981-01	1981-02	1981-03	1981-04	1981-05	1981-06	1981-07	1981-08	1981-09	1981-10	1981-11	1981-12	1982-01	1982-02	1982-03	1982-04	1982-05	1982-06	1982-07	1982-08	1982-09	1982-10	1982-11	1982-12	1983-01	1983-02	1983-03	1983-04	1983-05	1983-06	1983-07	1983-08	1983-09	1983-10
610	1	0.5	4	2123.73	4583.12	3663.81	2124	3935.16	4905.99	2104.41	1565.4	1501.39	1547.37	1490.21	1532.65	1526.29	1376.34	1801.68	1664.63	1591.04	1536.83	1391.41	1165.84	1116.61	1152.36	1113.37	1149.88	1189.75	1435.57	1606.63	1374.74	1247.53	1193.6	1176.61	1077.49	1042.39	1080.35	1051.33	1382.97	1370.42	1484.92	2034.78	1814.84	1324.05	1163.03	1299.86	1460.46	1371.08	1436.15
1294	0.35	0.1	6	53.1169	49.9589	51.7549	54.3063	91.2419	55.1847	47.9372	27.9041	63.7045	77.4411	99.9698	113.506	105.934	100.58	264.98	198.129	185.032	513.507	203.956	183.727	164.186	197.212	190.974	169.31	163.3	152.805	154.907	97.9871	115.799	90.044	87.2161	81.8709	74.3513	74.1154	71.1495	87.1303	106.523	179.939	216.12	113.566	116.439	98.3661	85.2379	76.2989	66.7947	65.3488
1247	0.25	0.5	4	66.614	77.8869	67.3875	62.4108	98.087	65.1545	45.9399	39.1747	193.909	260.281	173.692	283.074	105.854	86.3606	184.5	111.819	98.1651	90.176	96.2007	93.0401	85.891	831.339	166.606	158.834	143.955	166.287	162.264	122.206	421.431	315.748	200.179	148.291	124.121	114.54	102.183	110.214	121.037	150.215	148.554	136.743	113.228	122.279	89.9606	79.7336	71.3698	71.1607
1186	0.05	0.5	4	214.264	180.99	129.933	167.192	129.758	54.056	35.2177	24.5784	22.8974	23.2152	23.0472	23.5394	21.0336	20.3486	31.3937	26.5617	38.3915	109.226	37.5787	27.3356	22.7357	22.7101	29.4104	28.0453	28.6817	69.4464	40.5276	31.8467	132.292	122.627	33.435	14.8926	10.8394	14.4204	24.2942	352.672	84.7472	258.83	189.532	55.9968	36.5974	31.984	23.8273	16.4668	12.2622	11.4379
355	0.55	0.2	2	153.79	130.237	184.383	549.375	663.856	210.184	50.6941	34.1634	25.1725	45.2325	182.734	195.845	152.577	162.709	232.178	468.522	1014.28	236.461	60.3071	42.5988	32.9188	26.6416	62.2375	159.423	136.159	146.5	200.539	362.793	550.222	322.129	51.3132	34.5529	25.0319	43.7133	205.225	233.514	261.854	280.87	333.478	764.732	1342.91	499.988	95.9698	60.2485	130.894	187.814
1302	1	0.5	6	16.4249	14.2728	15.1561	12.3587	14.3601	9.70332	10.0519	13.0909	24.3353	30.8507	34.6337	32.0983	33.3593	28.9718	62.1808	40.3012	35.4376	257.672	31.1619	23.8154	20.7218	23.4156	22.1436	19.8341	17.7941	17.6675	16.5543	13.7493	18.183	11.4816	13.642	14.0657	13.3153	13.8202	14.0845	17.4383	22.8612	36.2561	49.6926	19.4842	16.6557	15.3009	15.8117	15.8105	14.3856	15.1621
1231	0.95	0.5	10	137.55	92.9471	63.2034	54.2474	49.4505	35.1651	24.9828	18.0947	13.5316	13.5778	12.9708	14.1181	13.605	12.35	15.0582	15.7469	40.875	277.118	59.9121	36.2964	27.9058	39.9726	82.6623	58.5785	50.201	61.7722	55.2397	43.4889	48.3936	39.7359	32.8716	23.2885	16.7275	15.6084	21.0533	283.731	72.3833	159.105	90.8558	67.5653	54.7578	48.7871	38.3403	28.3375	21.6583	18.842
1140	0.1	0.1	0.05	7.14454	6.45313	7.14454	6.63793	6.83399	4.99451	2.92409	3.69168	4.46793	2.3113	1.59292	2.5924	0.484579	0.437684	1.188	0.609494	1.42565	1.61447	0.252457	0.364211	0.401125	0.449277	0.438137	0.452741	0.452971	0.356532	0.242558	0.0701374	0.452971	0.412105	3.59195	3.83288	4.41349	5.06239	2.27806	0.511739	3.18509	4.62085	5.11594	4.95091	5.0644	4.31063	2.52171	0.40949	0.379395	3.34236
1296	0.05	0.1	6	34.7496	26.1379	16.7866	12.8789	21.1405	9.85257	5.92312	4.92995	6.57245	5.71833	4.68751	3.91691	5.7187	9.8416	8.9449	6.6471	3.263	22.5455	5.4011	4.24931	3.58573	9.39511	13.7539	5.5999	5.46059	5.05881	5.47008	5.56794	72.9534	60.2428	55.7399	7.78893	5.80929	5.97568	7.56074	45.7404	25.5032	64.5837	58.6895	31.8748	23.4979	6.62505	5.34471	4.42153	3.66949	3.49159
1277	0.05	0.5	5	1.06089	0.958223	1.06089	1.02676	1.07414	1.1544	36.4472	7.57162	2.96567	2.86065	2.73921	8.58285	6.94345	9.13645	17.6392	14.2712	7.83836	24.9279	26.3914	4.52407	4.7537	3.97724	2.40139	2.48144	2.48107	2.9615	3.20186	4.59598	11.7549	4.26446	1.06215	1.12818	1.03072	1.06184	1.02713	1.06136	1.06132	0.958608	1.06133	1.03939	1.08187	1.11705	34.0915	25.4053	3.029	3.05925
1280	0.2	0.1	3	38.1438	35.8023	38.0614	32.2288	45.0789	34.5046	28.6911	3.1002	334.091	187.007	86.5098	134.358	119.319	88.4866	136.167	99.8355	91.5365	77.799	71.8509	65.5939	58.4794	131.666	71.3542	69.3259	68.0386	65.7865	54.5797	38.2167	50.3535	47.5853	39.6881	26.6597	27.9462	28.5213	28.9839	30.9268	34.424	43.4565	47.63	39.6429	32.7316	29.7766	17.8738	13.8459	12.5117	18.986
182	0.65	0.1	1	330.523	273.783	167.871	143.638	134.006	123.734	125.066	121.29	110.533	111.447	107.157	110.943	113.109	125.311	167.667	135.263	38.1442	31.9516	26.6111	18.2091	15.6209	19.2135	89.8127	181.124	102.779	213.782	408.012	488.086	183.708	161.318	147.781	137.945	126.934	128.899	235.16	250.627	259.956	509.422	695.356	290.288	187.832	163.657	148.119	140.367	129.346	130.291
1152	0.25	0.5	5	0	0	0	0	0	0	0	0	0	0	0	0	0	0	0	0	0	0	0	0	0	0	0	0	0	0	0	0	0	0	0	0	0	0	0	0	0	0	0	0	0	0	0	0	0	0
1295	1	0.1	10	65.0127	64.8548	38.9894	27.6784	31.1599	17.4538	12.0833	7.84094	6.18993	5.81957	7.71461	12.0805	21.0964	26.953	16.9153	11.8869	21.883	71.0664	27.8798	15.1591	12.8185	15.6052	90.497	25.1446	33.4365	27.0594	33.518	77.971	83.251	28.9003	21.2066	14.946	10.0669	11.7804	116.572	133.946	69.0335	140.697	119.043	30.8983	105.485	24.7418	20.8693	18.407	17.0051	12.8532
629	0.25	0.5	0.95	2063.17	4384.79	3840.31	2109.58	3332.24	4763.04	2162.94	1765.04	1709.88	1766.94	1709.76	1766.29	1765.42	1593.89	1791.65	1643.04	1642.37	1629	1687.57	1637.87	1579.13	1629.38	1579.11	1637.43	1662.82	1507.07	1644.39	1523.18	1567.42	1462.94	1609.9	1421.7	1314.22	1359.16	1316.27	1531.69	1376.04	1317.26	1570.67	1280.3	1267.31	1255	1298.84	1613.07	1361.19	1486.34
1266	0.15	0.1	8	15.5507	22.6178	18.493	17.0835	24.8454	15.5266	13.8075	12.1208	10.0357	9.15661	7.94988	7.53341	6.96627	6.16452	7.57971	7.80113	8.23088	8.5884	10.5006	9.7568	8.49314	8.11871	8.36046	8.8267	8.75401	8.56502	9.98757	10.3717	14.8513	12.1551	11.076	9.32036	7.57859	6.80366	6.0368	30.6192	19.4766	70.3406	40.4778	19.6056	41.334	15.8911	13.5501	12.3261	10.5383	9.49112
1176	0.1	0.5	3	25.8417	23.8423	25.7534	25.1552	31.6335	38.8162	36.3681	30.6769	195.106	50.3394	145.161	100.179	26.8895	24.9955	47.4329	28.7141	28.2537	32.5333	55.9711	48.1503	39.2952	67.5263	38.8014	32.8544	16.0149	21.2905	17.1073	10.1051	119.387	138.451	65.8853	55.9363	41.096	31.7604	25.2651	18.1499	35.4263	72.0718	37.3924	22.0224	24.1904	35.6116	28.6096	24.8935	12.5895	91.4533
758	0.05	0.5	3	92.3278	83.2391	90.7535	84.4268	81.5006	62.6768	64.3465	63.4034	62.3677	65.1804	64.3147	67.6175	68.0119	61.5493	67.5486	65.3415	66.6195	44.0744	45.9288	45.2926	44.9361	52.6013	53.9033	57.793	60.0202	54.2169	59.4823	58.2087	58.8506	76.1253	78.2855	76.0743	71.3387	79.3761	81.1827	84.735	85.7287	75.8653	82.0911	71.8049	66.8834	57.2669	62.8666	59.8257	56.9332	61.2023
1242	0.05	0.1	7	8.96716	8.21906	8.13872	4.36439	5.53733	9.90659	10.738	0.96633	312.785	173.43	44.3082	47.7368	46.0343	37.5509	35.7682	31.0141	19.429	12.3723	13.8221	26.3545	50.1094	16.1688	13.9339	13.2902	15.2102	10.3532	8.50194	3.7555	2.82701	0.479975	0.537317	0.498956	0.351011	0.146677	0.154649	5.64852	148.822	97.7874	23.6518	33.3016	4.95936	5.61747	1.75159	0.580083	0.360014	3.31842
1236	0.05	0.5	0.05	0.811782	0.733222	0.811782	0.814554	0.841694	1.05465	3.1291	2.13685	1.64364	1.62356	1.57119	3.03764	5.86822	4.76793	9.16909	9.18916	7.6025	7.47318	1.08839	1.01017	0.787623	0.81212	0.785922	0.81212	0.812098	0.733508	0.812098	0.794309	0.820679	0.892226	68.9442	57.7605	8.75167	6.82504	6.65441	5.2894	5.28948	6.31325	8.3608	8.44332	10.7265	7.95467	0.954696	1.01168	0.8398	0.81211
1194	0.1	0.5	4	7.92956	10.7422	11.1623	9.37088	8.52565	7.10993	19.3851	10.6581	5.51606	10.7278	9.62084	13.0889	10.6711	8.22712	11.7549	10.6268	10.8992	9.19031	6.25209	5.31946	4.44502	94.4421	24.3023	19.3276	16.1947	19.7724	18.1369	14.4031	58.3872	32.1683	50.9194	46.3696	40.8902	38.596	34.5401	9.84369	9.73394	8.42621	9.94906	10.0058	10.9813	7.83618	6.67704	5.73152	4.20122	4.33513
[truncated: 434 more columns]

## Sheet: Storage(WG inflow-With Demand)
grand_id	a1	a2	a3	1980-01	1980-02	1980-03	1980-04	1980-05	1980-06	1980-07	1980-08	1980-09	1980-10	1980-11	1980-12	1981-01	1981-02	1981-03	1981-04	1981-05	1981-06	1981-07	1981-08	1981-09	1981-10	1981-11	1981-12	1982-01	1982-02	1982-03	1982-04	1982-05	1982-06	1982-07	1982-08	1982-09	1982-10	1982-11	1982-12	1983-01	1983-02	1983-03	1983-04	1983-05	1983-06	1983-07	1983-08	1983-09	1983-10
610	1	0.5	4	36665	36700	36700	36700	36699.9	36700	36688.5	36613.5	36573.7	36569.1	36585	36609.3	36627.1	36638.3	36674.4	36686.6	36565.2	36375.2	36140.2	35820.4	35547.1	35306.3	35086.3	34878.2	34677.1	34595.6	34665.5	34642.2	34335.4	33938.6	33533.5	33177.1	32908.3	32673.2	32469.3	32365.4	32372.7	32467.9	32740.5	33063.5	32983.8	32655.1	32316.4	32196.9	32188.4	32206.8
1294	0.35	0.1	6	1896.32	1871.98	1846.27	1820.54	1796.35	1771.32	1742.39	1713.98	1689.52	1671.15	1652.22	1640.92	1625.4	1612.4	1607.65	1607.74	1602.6	1623.72	1638.25	1630.55	1624.25	1619.66	1619.99	1615.1	1608.17	1602.32	1595.4	1584.52	1572.69	1557.67	1540.08	1521.21	1503.49	1487.6	1472.61	1459.15	1446.61	1440.93	1441.45	1439.5	1427.01	1416.2	1402.1	1386.91	1371.16	1356.89
1247	0.25	0.5	4	746.491	732.603	717.31	699.747	685.867	670.085	643.973	616.247	592.658	642.288	639.25	669.227	675.9	669.837	673.952	673.86	669.651	663.528	652.088	637.749	625.899	685.602	768.545	774.854	776.398	784.832	791.887	793.18	815.115	865.24	889.395	878.614	862.58	847.05	833.437	820.596	807.682	801.354	793.825	786.983	773.755	760.518	742.525	723.128	704.863	688.036
1186	0.05	0.5	4	262.728	302.586	275.508	261.003	248.102	244.633	244.89	245.013	245.267	245.103	245.28	245.008	245.035	245.187	245.115	245.115	255.693	310.151	328.141	334.021	341.176	349.521	362.867	370.894	377.63	401.514	420.225	431.194	390.631	299.001	244.739	244.64	244.13	244.36	244.974	282.102	249.037	254.451	249.071	244.14	254.144	268.934	276.556	277.773	276.216	275.039
355	0.55	0.2	2	449.236	451.283	456.036	478.115	544.231	578.815	515.729	418.813	370.516	351.242	351.341	362.637	370.55	375.091	385.115	418.213	492.41	566.466	516.412	419.333	353.066	326.836	316.844	318.903	323.992	327.57	336.206	359.904	405.957	448.13	414.068	325.102	271.978	257.272	263.602	281.701	303.47	323.153	353.404	399.521	528.861	643.483	626.435	538.673	482.317	475.918
1302	1	0.5	6	1374.89	1375.49	1374.89	1374.34	1373.3	1370.48	1363.36	1357.46	1356.51	1359.9	1362.53	1369.36	1373.16	1377.76	1385.19	1391.36	1392.91	1393	1392.16	1389.09	1388.4	1389.39	1391.66	1392.8	1392.56	1392.18	1391.4	1389.55	1388.24	1384.71	1378.26	1372.38	1367.78	1365.71	1365.11	1365.54	1366.12	1368.87	1373.94	1378.28	1376.14	1374.52	1371	1367.05	1363.4	1361.86
1231	0.95	0.5	10	1114.33	1117.43	1116.87	1116.14	1114.01	1107.37	1097.73	1090.28	1085.35	1083.16	1081.51	1080.97	1079.48	1078.18	1076.82	1074.09	1073.13	1079.3	1076.52	1070.28	1067.08	1066.88	1068.57	1068.49	1068.17	1068.67	1067.82	1066.53	1065.3	1062.17	1058.27	1052.74	1047.95	1045.3	1045.54	1053.96	1055.46	1057.02	1060.12	1059.42	1057.87	1056.64	1053.93	1050.07	1046.7	1043.89
1140	0.1	0.1	0.05	168.512	162.543	155.732	148.59	143.071	139.365	136.258	133.846	130.395	128.448	127.98	128.546	127.814	127.546	128.137	127.968	128.135	128.265	128.417	129.236	129.681	129.859	129.659	129.21	128.698	128.457	128.309	128.069	130.7	136.982	143.397	140.535	136.863	132.216	128.365	128.081	128.731	143.295	143.244	140.021	135.257	131.67	128.821	128.223	128.148	180.742
1296	0.05	0.1	6	128.766	126.255	125.999	126.003	126.562	126.263	126.314	126.343	126.354	126.209	126.36	126.437	126.273	126.351	126.328	126.335	128.662	157.247	174.764	178.072	182.121	186.217	212.938	225.034	231.029	236.921	243.018	249.022	240.178	198.262	147.489	125.147	124.839	125.649	126.179	127.756	126.023	129.924	129.089	126.476	143.356	172.609	179.159	184.02	188.373	191.669
1277	0.05	0.5	5	139.579	142.554	144.378	146.574	157.322	166.837	147.388	123.772	121.937	121.64	120.333	124.141	124.63	124.672	125.23	125.204	124.534	137.973	133.518	124.573	124.426	124.479	124.438	124.159	123.363	123.755	124.221	124.636	124.966	124.586	125.142	125.217	125.282	125.366	125.696	127.232	131.025	141.45	155.382	168.603	174.728	178.977	163.588	132.829	123.34	122
1280	0.2	0.1	3	320.619	293.276	264.685	237.008	211.747	181.358	136.869	119.2	180.734	313.867	316.806	336.156	353.06	363.842	380.238	381.637	360.335	330.266	284.923	235.794	203.474	191.127	195.073	174.772	153.293	136.098	121.906	120.858	121.849	120.878	120.737	120.41	120.564	120.554	121.123	120.848	120.802	123.828	127.162	127.596	121.832	120.781	120.444	120.586	120.643	120.663
182	0.65	0.1	1	465.395	736.011	1009.36	997.494	951.296	846.187	720.012	604.848	507.143	414.863	323.789	235.884	144.837	129.109	148.284	182.891	165.302	141.059	110.452	109.778	109.804	110.362	157.32	407.369	773.083	974.853	1102.7	1102.7	1088.54	1030.3	934.537	811.762	710.56	620.024	590.777	827.164	968.642	1098.74	1101.06	1088.86	1083.53	1025.53	911.901	789.849	691.212	597.981
1152	0.25	0.5	5	0	0	0	0	0	0	0	0	0	0	0	0	0	0	0	0	0	0	0	0	0	0	0	0	0	0	0	0	0	0	0	0	0	0	0	0	0	0	0	0	0	0	0	0	0	0
1295	1	0.1	10	852.151	856.744	857.714	858.982	859.329	857.049	850.003	844.123	840.78	842.772	844.776	847.667	849.253	852.224	852.176	850.549	853.442	857.895	857.544	851.345	852.948	853.757	861.805	864.714	866.835	868.367	870.064	871.021	871.41	867.562	862.223	857.928	853.372	855.459	860.826	871.202	871.979	871.927	871.796	870.549	869.326	868.442	867.156	867.343	868.151	867.531
629	0.25	0.5	0.95	46.9073	54.4425	59.7106	36.7116	42.6556	3.35869	41.4127	50.0505	47.2444	45.6166	45.1812	45.2728	45.3516	44.314	37.9623	48.9789	48.1971	51.3446	37.2149	70.8252	64.8398	63.0812	60.5409	59.6069	58.4855	57.4268	50.2328	50.8975	47.1705	54.2675	44.6978	70.0985	69.067	64.5345	62.2057	63.0384	62.3365	60.4656	54.5853	55.2019	56.1222	54.7133	58.0613	53.0281	51.5001	51.102
1266	0.15	0.1	8	169.708	169.586	167.53	165.772	165.365	163.21	158.362	153.567	149.446	146.827	144.232	142.239	139.028	136.744	134.523	131.115	129.169	129.268	127.652	123.746	123.264	122.972	122.729	120.911	118.994	117.703	116.235	115.564	116.295	114.761	112.684	109.898	107.036	105.346	105.385	109.742	111.104	118.288	128.131	131.417	134.188	138.031	135.863	134.839	134.083	132.315
1176	0.1	0.5	3	202.909	179.291	154.618	128.881	106.174	85.9985	72.8946	69.0212	73.7225	150.558	163.511	212.101	214.425	208.848	210.667	206.653	202.341	198.258	183.676	159.31	134.23	115.857	100.324	75.4073	67.808	67.6781	67.8104	67.9375	76.0818	91.7288	110.14	108.752	102.765	93.0648	80.7623	70.1172	68.1324	79.2747	74.1545	68.4054	68.0504	67.9852	72.1858	80.2411	84.8353	96.0814
758	0.05	0.5	3	94.378	94.2746	92.9617	87.9238	74.1121	68.4252	71.3454	79.5678	95.6094	97.5405	98.9386	98.2508	93.6659	89.7625	85.0131	88.8068	90.2263	100.541	112.797	110.4	113.921	132.675	129.637	124.199	122.348	117.409	114.348	119.115	116.637	110.465	110.329	104.741	93.9466	107.758	111.419	103.064	97.3812	87.9083	80.0836	70.8742	68.0896	76.2192	95.6205	94.4166	96.9784	108.479
1242	0.05	0.1	7	163.969	161.175	157.548	152.874	144.544	123.806	83.7777	63.1429	68.3765	151.465	158.473	163.379	168.263	171.91	174.042	174.644	169.858	149.687	116.863	88.5979	78.5276	74.9062	73.4555	72.7826	72.1437	72.2661	71.5654	69.8863	65.9978	63.3326	62.8872	61.8328	60.4913	60.2019	59.7367	62.0829	78.2038	101.575	110.116	111.537	107.269	89.1794	63.4556	60.7511	58.8265	59.7976
1236	0.05	0.5	0.05	57.8558	58.8205	59.8104	60.305	60.3928	55.8679	52.6938	52.3179	51.8045	51.6761	51.2005	52.2467	53.1122	53.1243	53.0977	53.1073	53.0633	53.0252	53.3678	53.378	53.8322	72.8322	95.0539	105.665	115.18	124.315	134.393	144.619	153.864	164.129	139.892	74.8368	52.3431	52.6725	52.2925	52.7887	52.6022	52.7145	52.4079	52.4403	52.3574	52.236	53.3214	53.3774	53.3824	54.1569
1194	0.1	0.5	4	60.1516	63.4936	67.2674	70.6583	73.69	74.5912	65.4417	51.7178	50.2794	50.2424	50.2505	50.2083	50.2523	50.2576	50.2885	50.2814	50.2267	50.2038	50.3834	50.4108	50.771	70.5882	100.543	108.827	114.967	122.864	130.025	135.98	151.685	170.889	165.787	139.705	112.506	86.3207	61.0462	49.9632	49.926	49.9071	49.9644	49.9381	49.8838	49.8937	50.3	50.3318	50.3566	50.364
[truncated: 434 more columns]

## Sheet: Outflow(OBS inflow-With Demand)
grand_id	a1	a2	a3	1980-01	1980-02	1980-03	1980-04	1980-05	1980-06	1980-07	1980-08	1980-09	1980-10	1980-11	1980-12	1981-01	1981-02	1981-03	1981-04	1981-05	1981-06	1981-07	1981-08	1981-09	1981-10	1981-11	1981-12	1982-01	1982-02	1982-03	1982-04	1982-05	1982-06	1982-07	1982-08	1982-09	1982-10	1982-11	1982-12	1983-01	1983-02	1983-03	1983-04	1983-05	1983-06	1983-07	1983-08	1983-09	1983-10
753	1		0.05	1509.82	1363.71	1509.82	1461.12	1509.82	1461.12	1508.36	1508.36	1459.7	1508.36	1459.7	1508.36	1508.36	1362.39	1508.36	1459.7	1508.36	1459.7	1593.38	1593.38	1541.98	1593.38	1541.98	1593.38	1593.38	1439.18	1593.38	1541.98	1593.38	1541.98	3060.58	1906.26	1751.77	1810.17	1751.77	1810.17	1810.17	1634.99	1810.17	1751.77	1810.17	1751.77	1737.75	1737.75	1681.7	1737.75
870	1		0.05	1728.34	1561.08	1728.34	1672.59	1728.34	1672.59	1728.34	1728.34	1672.59	1728.34	1672.59	1728.34	1728.34	1561.08	1728.34	1672.59	1728.34	1672.59	1728.34	1801.24	1743.14	1801.24	1743.14	1801.24	1801.24	1626.93	1801.24	1743.14	1801.24	1743.14	1801.24	2164.39	2094.57	2164.39	2094.57	2164.39	2164.39	1954.93	2164.39	2094.57	2164.39	2094.57	2164.39	1865.28	1805.11	1865.28
597	1		2	929.023	909.206	990.095	1107.82	1935.82	1945.94	1055.13	794	880.304	830.322	855.346	876.685	844.095	754.36	820.125	799.562	926.352	1065.77	675.345	600.367	672.995	748.726	641.092	636.493	619.977	655.541	769.547	833.214	1335.54	1461.84	1007.26	837.242	784.248	846.547	784.677	786.438	754.259	704.669	921.991	950.13	1689.79	2830.84	2190.03	1259.13	939.103	1021.59
307	1		0.5	480.145	433.679	480.145	464.656	480.145	464.656	466.144	466.144	451.107	466.144	451.107	466.144	466.144	421.034	466.144	451.107	466.144	451.107	524.031	524.031	507.127	524.031	507.127	524.031	524.031	473.319	524.031	507.127	524.031	507.127	558.08	558.08	540.077	558.08	540.077	558.08	558.08	504.072	558.08	540.077	558.08	540.077	535.737	535.737	518.456	535.737
1753	0.05		9	6652.6	3993.3	13029.3	5997.98	4858.5	2785.85	2880.28	2319.37	2296.37	1902.3	2523.13	2000.14	1802.74	3506	1879.3	2253.56	1258.89	2910.08	2562.46	2482.22	2115.8	1874.35	1815.17	3665.68	10241.3	8306.88	6147.57	3058.56	1942.99	1990.95	2813.09	3646.75	2761.98	2557.47	3836.34	10106.1	5750.95	6148.99	3970.87	8009.52	8216.04	4026.23	3296.28	3070.75	1947.71	1581.76
297	0.65		0.05	877.316	792.414	571.67	466.958	877.316	849.015	877.316	745.287	721.245	745.287	721.245	745.287	745.287	673.162	745.287	721.245	745.287	721.245	745.287	1096.02	1060.66	1096.02	1060.66	1096.02	1096.02	989.949	1000.56	392.444	1032.38	1060.66	1096.02	758.774	734.298	758.774	734.298	758.774	758.774	685.345	758.774	734.298	758.774	734.298	758.774	912.295	882.866	912.295
1036	0.15		2	119.31	215.886	410.143	379.506	274.222	403.392	374.434	229.76	144.76	63.5256	130.429	64.7723	50.5669	112.744	112.205	78.517	173.54	143.744	129.379	178.962	62.0834	110.066	111.34	140.558	403.727	862.125	514.013	289.477	235.585	565.266	331.57	323.744	196.589	135.085	296.332	1776.65	398.3	554.074	534.051	874.799	923.422	404.663	562.158	446.979	264.635	204.477
989	0.15		1	46.1917	434.604	791.339	1367.01	266.405	139.637	34.8861	121.386	47.2162	49.6258	24.524	48.6013	28.2639	39.9407	29.9955	49.3019	494.111	2025.43	1255.55	747.675	526.125	514.462	711.343	492.987	550.495	1208.06	1078.04	318.576	1348.06	2113.45	637.063	799.896	288.316	152.132	118.437	1345.62	525.209	650.904	676.75	2943.19	1808.29	799.142	759.474	648.169	276.682	294.631
1026	0.95		2	102.928	257.099	327.633	254.514	181.86	219.453	116.408	133.148	59.6736	54.1836	78.9863	74.1096	49.9911	61.8112	90.8709	113.71	213.852	357.711	224.083	287.466	125.134	127.707	129.083	144.702	311.556	517.236	272.136	239.627	207.399	427.454	189.837	247.429	108.963	111.898	166.773	1003.53	170.319	396.093	323.727	631.023	560.473	229.553	340.877	182.869	123.066	149.404
1848	0.15		3	267.125	205.225	595.729	384.875	188.621	158.969	150.102	141.39	146.417	158.245	195.124	109.407	86.0607	153.766	165.578	194.576	87.7264	73.1491	58.6194	32.3933	46.8431	40.7877	33.0731	52.2984	172.168	108.666	105.33	195.89	225.917	225.169	203.914	231.232	204.328	277.671	229.063	761.345	299.082	359.528	339.709	524.937	546.219	202.503	196.778	209.344	194.307	196.046
1869	0.35		0.05	246.418	192.654	286.741	336.024	330.67	320.003	330.67	330.67	233.602	90.6675	70.4006	33.067	33.067	125.868	109.868	89.6008	13.6572	24.6816	25.5043	25.5043	24.6816	25.5043	24.6816	25.5043	25.5043	23.0362	25.5043	24.6816	320.008	309.685	320.008	320.008	188.908	78.4536	77.4213	320.008	320.008	289.039	320.008	309.685	453.807	439.168	453.807	453.807	439.168	453.807
7313	0.35		0.85	325.661	339.868	332.565	419.246	766.133	865.797	345.762	200.93	307.556	333.064	344.125	309.653	283.692	255.629	288.669	316.328	801.619	1003.85	414.247	295.959	296.181	426.593	420.155	394.001	319.773	322.994	365.774	444.139	806.855	1130.28	657.364	279.463	349.478	412.999	400.501	346.26	353.473	308.646	376.122	394.05	533.417	752.827	668.238	369.006	402.719	497.19
1042	0.95		3	85.0006	96.817	123.917	136.23	101.197	101.31	72.1761	65.7705	65.234	66.8214	65.1125	67.115	66.6052	64.0719	79.9478	76.4145	90.3661	77.6156	66.3927	64.8308	53.0538	61.3661	57.6275	59.7171	89.3281	158.37	96.2575	86.8782	108.521	109.897	82.4963	68.4266	58.323	61.3164	84.6091	384.065	104.568	101.969	105.934	373.83	339.416	105.912	91.5537	76.4094	70.3432	81.1423
884	0.2		1	1870.86	1313.8	1648.55	1556.81	2159.98	2037.63	2416.3	2758.56	2146.98	1932.5	1916.16	1147.49	1413.77	1382.51	1783.07	2516.28	2244.7	1816.79	2186.39	2335.81	1803.23	1520.68	1105.93	1290.11	1487.88	1083.06	1423.49	1729.12	1702.9	1241.98	1971.37	2358.99	2251.62	1763.73	1918.76	2047.99	2244.79	1587.4	1367.7	759.835	971.676	1590.76	1450.31	2744.29	2053.84	2063.99
1144	0.15		0.65	1271.22	1559.27	1153.59	1077.02	1234.16	867.982	564.52	421.668	392.767	1375.25	878.012	1315.5	835.683	831.087	1029.47	807.225	897.503	1911.86	1005.78	781.202	646.806	2047.77	1864.33	1300.53	1027.22	2356.23	1503.84	986.645	2357.13	2951.15	1623.64	1107.01	909	863.244	886.777	4119.27	1618.39	1975.52	1839.09	1371.15	1774.94	1213.57	1108.17	866.703	738.857	701.838
1006	0.15		3	19.1234	63.1958	103.749	94.5507	60.0915	45.5497	31.3217	6.04704	5.75314	20.4701	6.83185	10.9346	5.74684	13.4335	15.2918	19.2005	57.5507	138.345	57.6059	46.0805	31.4669	57.001	62.7256	50.1017	83.5234	85.8289	72.3093	52.8256	76.3734	116.405	70.8447	91.4208	69.3428	64.1104	73.1502	199.081	85.0591	73.6539	72.8674	233.25	157.947	93.46	93.6098	68.0227	65.618	134.707
1048	0.1		0.7	250.522	246.301	405.519	1410.06	1183.52	1042.36	89.8869	98.2257	28.9356	63.2543	33.9201	62.3801	90.1392	51.3159	59.6916	48.6734	234.675	317.723	348.876	163.287	141.199	238.21	709.407	156.611	164.389	399.047	469.432	163.403	2176.85	1977.35	1057.14	395.066	50.9634	51.6201	61.4313	100.182	178.817	261.048	558.516	1578.2	1266.04	873.77	605.459	72.909	99.9155	472.15
1032	0.15		1	31.6728	118.296	303.059	457.697	123.889	27.3328	1.56002	12.1596	13.4271	11.9292	1.8213	9.16283	2.23345	7.94308	11.8311	29.6804	64.7935	99.8196	104.876	36.7133	52.9536	62.9885	154.137	48.2005	101.278	204.224	210.306	42.0554	412.155	783.711	252.146	136.4	34.5036	13.3835	35.7934	160.667	122.134	388.539	283.471	1061.1	509.306	223.857	121.267	26.352	7.2296	166.731
355	0.4	0.1	0.95	154.559	155.166	191.843	172.797	243.289	369.729	335.765	237.869	242.997	195.061	182.032	175.64	165.704	146.486	160.43	126.054	284.836	500.998	234.679	191.695	178.62	203.664	184.201	186.227	162.955	176.399	220.016	164.584	179.206	410.929	418.848	258.241	239.334	300.324	227.918	218.802	238.486	220.322	210.032	167.6	266.066	541.787	578.797	310.266	277.897	305.355
1101	0.05		5	143.813	85.7829	563.919	529.218	81.8616	104.33	87.5017	36.2229	38.7054	40.2856	130.406	60.7301	37.4382	113.135	70.2601	153.23	63.9422	231.028	92.1259	39.7694	70.3685	41.2219	21.1819	44.4597	124.874	224.824	153.821	182.451	71.2763	70.9729	51.8525	126.91	45.5731	47.1391	35.6542	438.844	467.817	190.39	195.965	319.954	366.96	154.951	90.2409	46.3246	36.0355	38.5354
1023	0.05		4	138.06	165.379	307.961	669.019	177.016	107.025	25.4807	64.1223	23.4089	22.8956	21.9665	36.0455	30.7349	28.2199	39.4144	32.7101	135.607	177.516	122.843	105.473	51.2907	116.073	417.622	97.9797	64.0594	235.686	226.064	87.2677	581.709	939.411	269.428	79.1688	47.4985	32.6425	35.1251	49.0971	54.6115	117.579	338.774	867.636	381.934	417.413	340.272	57.0862	39.5025	74.7677
1864	0.4		1	111.014	84.0236	193.442	153.808	104.814	99.5813	97.2916	95.7259	94.7681	66.7812	68.5747	33.1316	26.66	76.4712	69.3366	62.5497	22.0088	19.7339	19.1531	17.3537	17.094	20.9625	16.6817	17.7375	39.1309	27.9405	22.9572	58.6932	109.743	107.818	105.96	121.967	124.068	128.181	118.649	238.893	132.142	139.072	141.391	170.783	232.01	157.999	167.593	159.053	169.623	161.707
1021	0.05		4	24.1844	19.9348	35.4673	78.209	65.5687	87.7881	7.47156	5.23354	1.25179	1.44253	0.626402	8.81	6.27188	3.70616	11.8558	6.0558	59.7791	40.0672	17.2319	13.4946	54.6548	27.1168	120.732	15.2972	12.0043	32.6874	34.7836	13.0341	185.103	184.563	153.523	17.1481	2.29823	2.3519	8.64958	10.5785	9.80888	20.7836	61.0976	98.9362	62.6695	135.656	24.908	1.50041	18.0409	19.0137
1120	0.05		9	1.9546	3.34779	3.88014	2.46984	15.9625	5.53286	0.0769046	0.059001	1.89431	0.748441	0.866794	1.90541	0.79099	2.22729	3.54478	4.69227	8.38399	18.4878	12.3532	4.69609	5.44893	24.9797	3.63389	1.188	4.73084	4.06696	11.8018	3.90469	125.678	62.3186	34.1983	16.2104	14.6997	1.41628	1.52038	4.82048	6.23139	13.5291	6.98022	6.91429	34.8081	14.0614	0.411502	0.255964	0.0570978	142.018
182	0.9	0.1	0.75	973.622	858.725	586.856	495.562	470.423	270.845	228.646	172.331	183.392	149.458	161.534	197.581	186.591	183.927	268.712	229.677	167.069	114.606	118.871	113.685	114.792	112.522	364.257	637.368	535.631	1055.72	893.059	1343.67	904.098	442.899	257.966	216.531	193.196	215.192	333.209	722.41	615.318	927.706	1488.43	843.967	983.802	899.68	462.286	235.696	204.719	179.623
7311	0.1		4	1.41076	12.2076	69.9255	42.2204	18.8363	1.65153	0.102167	0.165336	0.0943494	0.168629	0.125994	0.952405	0.0978561	0.294575	1.11733	1.58034	12.2883	15.081	5.68649	2.5207	0.99444	5.00934	14.6662	3.53564	3.70388	11.4861	26.7737	1.82842	79.4079	171.482	18.3143	17.3405	10.3324	1.39548	1.31561	19.7168	7.96828	56.9218	56.0209	131.233	61.0614	21.9211	9.51269	1.02697	1.00686	11.764
1755	0.6		1	102.545	122.133	186.685	82.9305	65.7792	52.3784	48.9608	44.0221	39.4062	38.3593	37.9897	46.7603	52.3006	166.005	81.7849	85.0754	57.7288	165.257	46.3812	40.1394	35.2073	33.8881	44.4056	112.52	213.014	157.334	81.547	84.622	94.7011	76.6646	71.9885	71.3471	125.654	66.5777	65.8134	179.798	109.87	134.819	93.3166	190.537	363.955	79.1616	54.5824	46.7308	42.6971	52.6473
1192	0.45		7	371.993	446.299	264.495	420.939	396.986	92.6453	44.8759	41.1832	45.9372	46.7724	64.9475	72.4714	60.0545	78.3196	98.8894	78.3958	260.36	500.471	116.248	55.1026	51.4727	107.839	79.5927	66.5176	88.3846	173.548	117.986	101.696	135.658	131.283	95.3321	43.3973	55.5257	64.948	95.7091	480.986	181.483	488.283	378.009	198.058	155.42	98.4931	144.902	59.3546	43.6876	46.1971
541	0.4		0.6	36.1942	34.3664	36.2063	123.388	248.461	285.154	164.376	134.827	127.953	128.997	81.3189	34.3369	30.2912	25.3658	34.1029	45.834	65.3612	123.01	49.439	43.4339	39.5707	38.5055	35.9763	36.8366	36.8309	32.739	40.162	51.0408	90.2037	123.537	199.57	185.672	174.521	172.551	158.366	53.7521	39.3039	33.3039	50.3606	71.9804	163.831	280.311	178.819	146.858	121.394	121.01
1716	0.15		1	30.9422	38.7548	74.6673	43.7762	26.9886	13.3164	13.9881	9.56253	9.13956	9.97757	11.8404	15.2003	12.087	51.7319	18.8372	16.7096	71.809	52.5188	25.8169	14.5625	10.33	12.5474	9.93896	27.2225	88.5695	104.003	62.5693	51.1527	35.4674	21.1019	15.537	9.81724	14.1764	10.4667	12.3744	162.039	49.0535	47.2141	52.8876	94.4664	102.896	93.8906	81.663	19.6337	12.1701	79.4437
1883	0.2		0.8	63.8736	57.3533	64.8494	82.1976	81.2178	52.8052	50.9167	37.3807	15.36	20.5834	41.5793	39.6985	36.8471	44.1096	52.6389	47.3875	59.2289	86.7928	56.1588	55.773	43.2063	45.942	39.2053	42.4426	48.3861	45.426	52.1282	52.9434	52.1847	41.7875	24.8933	18.9319	12.4877	14.562	14.3669	78.409	49.903	140.592	66.5697	51.6893	88.8236	74.2401	64.1666	48.6779	49.7361	39.4976
895	0.15		1	1428.61	1057.76	1556.97	2109.41	2310.05	2157.09	2600.03	2698.05	2534.11	2654.04	2464.43	1214.64	1034.19	885.917	1699	2437.53	2477.99	2318.95	2536.68	2408.95	2461.17	2547.09	1377.04	1070.28	1110.38	902.503	1349.02	2098.33	2198.67	1954.07	2311.14	2386.74	2347.52	2592.12	2863.43	1980.86	1826.82	1496.46	1628.77	1200.79	1868.38	1574.89	2105.55	2648.53	2570.19	2672.98
1093	0.6		2	29.2518	45.859	39.189	71.2659	154.31	37.413	5.49868	4.8353	5.45251	26.6058	13.989	52.6521	10.4586	43.7952	86.0084	38.0572	163.287	232.039	53.4368	24.74	9.98951	141.142	48.1258	28.4846	149.414	194.653	98.5654	26.376	288.253	164.659	17.0195	11.7201	5.61598	8.89469	25.5267	289.518	42.5226	87.8287	93.1224	127.969	362.507	36.4222	44.5346	10.4227	6.42776	7.46876
1709	0.2		1	170.723	156.052	306.975	261.912	156.065	53.892	118.435	89.5985	32.1945	42.128	95.887	92.2698	63.6813	251.259	201.68	268.154	293.687	323.573	88.0834	130.677	83.7383	124.255	105.073	222.833	249.597	323.046	439.184	165.726	114.694	231.66	87.0325	70.6841	46.8981	72.5442	141.486	185.85	82.5835	154.281	244.445	285.574	208.656	101.557	128.32	31.189	23.8884	71.605
1017	0.35		0.95	34.0319	47.4637	59.099	66.6929	39.2102	25.0252	17.1979	20.5718	21.125	15.9782	18.4194	20.9644	17.5557	22.3762	23.2469	32.6687	95.2389	56.8238	65.679	28.7766	20.843	23.4914	51.7621	33.8698	53.3653	162.304	63.4888	65.4553	43.768	54.3959	35.8061	99.9397	79.6364	52.8418	51.3193	376.265	78.0841	52.2577	43.3442	161.626	253.61	67.2161	53.3189	48.5415	47.126	55.4315
[truncated: 434 more columns]

## Sheet: Storage(OBS inflow-With Demand)
grand_id	a1	a2	a3	1980-01	1980-02	1980-03	1980-04	1980-05	1980-06	1980-07	1980-08	1980-09	1980-10	1980-11	1980-12	1981-01	1981-02	1981-03	1981-04	1981-05	1981-06	1981-07	1981-08	1981-09	1981-10	1981-11	1981-12	1982-01	1982-02	1982-03	1982-04	1982-05	1982-06	1982-07	1982-08	1982-09	1982-10	1982-11	1982-12	1983-01	1983-02	1983-03	1983-04	1983-05	1983-06	1983-07	1983-08	1983-09	1983-10
753	1		0.05	24353.1	24108.1	24057.5	24093.6	23815.2	24230	24940.8	24938.9	24933	25121.1	25194.6	24748.4	24546.6	24398.8	24431.7	23929.7	23475.3	25171.8	26531.3	26443.3	25985.9	25692.3	25554.1	25370.1	24882.2	24740	25299	26477.6	26959.4	28415.2	30178.6	30157.2	29707	29616.8	29423.7	28959.5	28573.4	28377.6	28783	28457.2	27755.7	27988.9	29093.7	29232.1	28629.2	28102.2
870	1		0.05	21064.5	21340.9	21921.1	22140.7	21690.4	21382.8	21159.5	21054.1	20940	20902.7	21120.6	21338	21304.9	21688.2	22161.6	21905.7	21372.1	21337.4	21645.6	22071.7	21828.8	21430.9	20824.1	20544.3	20359.5	20951.3	22133.4	23757.7	24591.3	26129.1	26369.7	26108.1	25450.1	24971.9	24930.8	25066.1	24506.7	24286.7	24956.4	25181.2	24860	24032.4	23224.2	22709.1	22736.9	22268.5
597	1		2	15998	15735	15608.9	15375.1	16189	17762.8	18411.5	17860.2	17384.2	16907.3	16484.7	16099.7	15691.3	15240.6	14786.2	14240.1	13813.4	13671.5	13336.4	12874.5	12522.3	12345.8	12117.5	11831.1	11474.9	11232.4	11148.7	11040.4	11564.4	12574.1	13331.7	13307.3	13296.5	13321.1	13368.3	13390.2	13298.6	13262.5	13371.9	13548.9	14388.4	17077.4	20101.6	20895.3	20675.6	20438.7
307	1		0.5	15230	15057.6	14929.7	14889.3	14721.5	15250.5	15855.3	15673.1	15394.7	15184.3	15138	14986.5	14937.5	14871.1	14918.8	14839.4	15009.9	16961.7	17765.6	17493.7	17066.2	16747.6	16501.5	16283.8	16013.6	15990.6	16318.7	16574.5	16725.5	18056.5	19339.6	19294.8	19036.6	18860.7	18699.2	18553.9	18406	18290.2	18264	18096.2	18027.5	18152.2	18339.9	18265.8	18002.3	17748.7
1753	0.05		9	6228.09	6248.92	6267.05	6281.02	6227.7	6153.99	6093.83	6002.23	5946.97	5941.67	5954.15	5984.31	5984.51	6023.39	6030.27	6026.51	6006.45	6056.32	6008.76	5959.63	5933.08	5899.77	5894.73	5914.1	5973.85	6042.15	6062.1	6066.29	6013.62	5947.52	5889.56	5828.69	5873.3	5849.08	5831.12	5945.85	6007.71	6035.89	6029.92	6067.9	6163.8	6140.8	6061.93	5950.14	5853.71	5823.1
297	0.65		0.05	2138.8	1421.53	831.277	758.723	2178.27	3738.12	4253.65	4087.66	3790.73	3448.99	3039.39	2578.04	2261.05	1796.5	1356.93	984.306	1645.65	3879.66	5535.24	6135.22	5690.72	5019.83	4266.65	3445.64	2535.81	1706.12	1008.88	725.188	960.888	2641.45	4181.03	4289.56	4167.25	3952.68	3608.43	3169.22	2736.34	2292.88	1901.57	1529.15	1886.52	3682.97	4742.16	5064.66	4722.22	4206.03
1036	0.15		2	664.011	664.488	667.548	673.001	663.029	669.878	677.35	662.245	663.337	665.214	664.762	663.263	664.352	664.147	664.058	664.537	665.766	663.86	663.792	665.489	664.41	664.802	663.561	663.154	667.085	763.561	791.901	789.378	749.391	746.961	757.062	725.209	687.545	663.184	665.342	875.163	977.006	965.282	975.496	1035.66	1150.58	1135.3	1079.47	1003.25	916.507	802.075
989	0.15		1	616.78	629.598	632.902	722.246	631.927	631.751	639.336	659.05	661.181	645.121	641.594	641.374	640.866	642.2	641.014	643.106	716.362	1138.69	1569.78	1205.23	768.517	627.261	627.064	625.438	628.546	641.153	646.221	628.022	635.189	853.735	797.121	704.299	646.593	634.465	635.44	779.216	768.804	663.975	643.247	1256.34	1851.85	1954.52	1644.6	1083.5	656.246	629.199
1026	0.95		2	2145.51	2134.25	2134.49	2148.11	2128.12	2111.07	2086.76	2052.15	2018.6	1985.03	1964.77	1944.28	1914.96	1889.96	1866.16	1840.57	1832.84	1844.18	1854.68	1860.3	1851.05	1839.42	1841.96	1828.1	1828.43	1898.13	1906.79	1913.94	1903.99	1920.65	1930.53	1924.33	1919.98	1900.56	1887.24	2005.82	2036.5	2045.37	2065.84	2112.01	2185.5	2185.75	2186.37	2167.53	2143.8	2124.95
1848	0.15		3	381.106	401.375	506.055	821.366	860.055	793.255	716.963	625.393	532.067	462.003	411.674	379.659	369.449	372.967	371.971	387.165	399.83	500.526	549.642	570.529	608.142	632.599	661.98	699.395	798.856	941.662	1035.98	1176.83	1203.19	1108.21	981.468	867.63	759.12	692.794	587.65	727.084	988.488	1028.19	1065.77	1184.32	1331	1398.38	1267.64	1134.18	993.123	869.035
1869	0.35		0.05	341.379	339.85	712.926	1395.75	1407.93	1189.78	959.356	670.812	383.058	331.151	327.427	329.17	324.753	335.577	331.696	327.815	340.517	405.03	434.572	434.674	442.397	443.548	444.852	441.229	576.375	749.465	863.784	1222.67	1333.65	1058.43	800.751	548.949	350.695	327.439	336.266	828.412	1457.25	1703.45	1797.36	2001.43	2130.8	2071.61	1723.5	1352.93	957.403	556.782
7313	0.35		0.85	403.942	304.96	249.221	245.897	301.492	448.336	503.242	398.05	349.59	370.686	412.573	443.17	463.02	467.95	482.828	496.646	619.323	1000.95	1049.75	824.758	616.89	500.413	437.404	366.92	269.593	245.96	245.111	245.669	289.969	479.631	700.789	628.832	552.382	574.797	607.733	630.077	632.464	632.511	641.318	656.452	706.41	860.711	973.599	885.319	791.912	767.88
1042	0.95		3	2052.46	2055.54	2085.34	2162.35	2191.83	2205.41	2193.64	2157.34	2121.24	2090.87	2068.34	2046.57	2019.69	1999.45	1981.82	1973.82	1975.35	1985.99	1973.63	1947.7	1918.44	1889.74	1873.79	1851.31	1835.76	1946.86	1990.63	2005.91	2024.46	2067.33	2083.7	2067.06	2043.7	2015.51	1998.92	2325.5	2445.19	2445.75	2445.71	2446	2446	2442.76	2435.65	2396.15	2354.01	2327.68
884	0.2		1	409.125	404.542	397.235	390.461	378.524	375.646	362.914	360.38	355.615	354.076	357.032	354.646	348.18	341.543	334.4	337.342	336.756	335.719	335.128	337.015	331.243	326.898	323.24	321.345	320.53	315.788	313.106	317.631	318.538	321.61	317.18	313.749	317.727	325.708	327.513	328.36	329.762	328.276	330.726	330.801	327.887	323.36	317.021	308.484	309.069	311.37
1144	0.15		0.65	218.108	232.279	226.333	217.764	209.13	212.577	218.183	220.899	223.375	250.908	255.172	265.462	264.174	261.586	264.295	261.175	261.781	295.114	296.609	272.017	243.728	233.647	272.103	268.59	250.539	279.118	289.847	280.271	276.502	340.67	350.881	324.903	287.99	255.064	225.267	278.501	314.539	308.658	322.166	310.765	301.47	289.514	279.833	258.017	231.87	215.57
1006	0.15		3	205.614	210.138	219.008	268.892	263.952	244.388	217.723	205.786	205.175	206.026	205.85	206.198	206.006	205.812	205.884	205.71	214.388	254.716	319.491	317.39	298.858	284.977	307.534	304.669	307.787	361.081	381.342	386.612	392.311	427.885	405.927	370.944	354.903	312.077	269.38	340.902	349.332	324.322	289.232	344.222	457.42	455.409	430.185	374.86	317.457	296.811
1048	0.1		0.7	197.654	196.537	194.601	189.262	191.615	196.712	205.547	207.915	211.316	209.416	208.969	208.679	209.122	210.937	212.336	212.679	222.172	263.047	233.124	201.555	201.521	202.395	202.028	201.591	202.35	198.543	197.27	202.114	266.917	444.107	441.805	277.47	201.943	200.263	200.646	199.59	199.157	197.329	196.066	190.869	198.236	190.276	191.651	203.491	202.71	213.604
1032	0.15		1	190.234	188.928	191.077	227.414	195.01	189.517	191.787	192.037	192.383	192.352	192.062	192.673	192.153	192.318	192.16	193.884	199.748	210.17	200.603	190.229	190.298	190.783	192.256	190.582	191.216	193.447	195.956	190.661	205.431	307.768	329.388	241.794	188.643	187.671	188.416	189.474	189.115	195.96	191.341	278.284	350.693	314.498	250.745	191.124	186.052	194.991
355	0.4	0.1	0.95	336.375	329.753	332.656	337.645	339.668	378.129	393.572	319.455	302.158	312.233	321.843	328.846	332.244	330.666	332.637	325.565	331.695	437.23	440.699	330.954	253.724	233.109	235.969	237.758	230.888	225.672	237.237	242.689	229.702	258.864	324.451	312.04	292.975	351.871	403.279	443.683	483.765	526.561	567.266	591.038	616.932	713.99	822.208	758.038	683.517	668.076
1101	0.05		5	169.408	169.094	175.143	202.973	204.84	197.318	186.138	173.949	169.619	169.986	170.248	169.759	169.853	169.958	169.368	170.443	169.631	173.836	173.214	170.08	170.028	170.587	170.062	169.964	170.449	174.451	175.781	178.242	177.665	172.41	169.851	170.081	169.812	170.12	170.394	185.435	208.946	213.083	215.5	223.06	231.584	238.784	224.545	206.517	188.38	173.156
1023	0.05		4	161.596	161.32	161.866	175.473	173.97	166.761	162.988	162.744	163.035	163.257	163.136	163.171	162.901	162.969	162.982	162.941	163.087	162.174	161.805	162.18	162.443	162.416	166.989	162.666	162.797	162.977	162.656	162.048	168.088	189.781	195.679	182.521	167.815	162.878	162.902	162.681	162.327	161.325	161.974	179.052	177.421	176.574	177.293	165.623	162.796	162.888
1864	0.4		1	158.542	154.841	250.054	445.537	458.942	406.369	347.776	274.619	197.694	155.823	148.539	147.617	147.874	153.35	149.702	151.947	157.335	187.906	200.794	205.171	212.681	220.932	235.317	244.794	294.781	352.659	389.942	467.458	501.269	438.673	363.059	307.701	309.637	298.111	249.641	396.467	593.661	646.604	691.551	783.415	851.106	851.449	746.86	619.239	518.735	411.168
1021	0.05		4	121.609	121.669	121.806	121.969	122.999	125.655	128.8	125.755	123.729	123.907	123.874	125.487	125.212	124.678	126.392	126.435	130.685	131.439	122.811	121.724	122.678	122.311	126.044	121.648	121.756	121.554	121.75	121.724	128.004	138.173	134.591	124.571	121.326	121.526	121.786	121.697	121.73	121.936	122.322	122.591	121.917	124.285	122.209	119.693	121.187	122.224
1120	0.05		9	114.537	115.082	115.04	114.915	115.316	115.021	114.936	114.265	114.386	115.368	115.708	116.609	116.071	115.529	116.946	117.477	119.182	125.705	119.338	115.066	115.005	116.549	114.574	114.376	113.924	114.889	115.259	115.001	129.027	148.445	148.479	135.492	121.305	114.3	113.421	114.908	114.868	115.219	115.145	114.947	116.435	115.043	115.068	115.031	114.881	134.852
182	0.9	0.1	0.75	1005.21	1102.7	1102.7	1102.7	1102.67	1092.44	1054.02	1000.49	956.553	920.61	876.745	855.844	827.274	818.787	815.754	838.976	821.622	751.49	657.558	587.422	543.834	507.654	527.606	706.906	1029.62	1102.7	1102.7	1102.7	1102.7	1102.59	1085.09	1044.72	1016.68	995.173	1016.71	1099.53	1102.7	1102.7	1102.7	1102.7	1102.7	1102.7	1099.79	1084.55	1062.14	1039.83
7311	0.1		4	102.213	103.932	105.479	113.133	105.961	104.332	103.789	104.217	104.529	104.629	104.845	104.941	104.805	104.856	104.88	104.865	106.035	110.341	106.049	104.388	104.095	104.209	104.729	104.679	104.581	104.581	105.17	104.746	107.245	128.879	136.394	122.407	108.468	104.059	103.9	104.569	104.578	107.113	105.213	123.497	124.445	116.683	106.426	103.72	103.084	103.625
1755	0.6		1	196.459	218.879	281.241	338.531	336.771	326.058	308.539	285.511	260.23	233.5	207.288	186.598	167.356	221.215	246.74	252.919	257.357	334.447	343.264	331.083	317.607	301.4	287.69	310.814	401.835	498.438	550.463	572.069	570.777	539.498	498.049	454.383	459.231	416.666	371.033	370.859	386.721	403.673	391.202	396.296	536.332	640.515	613.492	571.801	529.801	492.877
1192	0.45		7	794.816	801.783	803.013	806.629	808.41	803.374	792.322	780.277	769.978	767.998	768.693	770.695	769.486	769.677	768.501	765.383	767.527	774.105	767.688	757.395	753.28	753.434	757.363	757.147	757.798	762.201	760.796	758.219	756.556	750.313	742.493	733.442	723.804	721.337	724.459	739.476	746.229	753.234	756.998	756.648	754.28	751.305	745.987	736.667	726.989	721.386
541	0.4		0.6	89.1064	89.5687	89.285	89.4847	128.206	286.667	385.445	327.89	251.048	175.077	101.003	90.1201	89.9452	90.273	89.9813	89.9144	90.1555	93.3232	101.445	115.132	115.84	114.587	111.755	108.074	105.925	101.123	98.7121	115.61	204.188	381.88	479.2	415.064	349.236	269.862	163.378	91.0336	89.2996	89.6531	89.2552	89.233	93.7236	231.215	389.269	419.094	382.064	319.515
1716	0.15		1	75.0754	77.2138	83.041	87.1288	75.2455	74.437	74.6159	74.3577	74.4494	74.5217	74.7295	74.4604	74.3344	78.5799	74.4553	74.3311	83.2644	92.1268	75.0097	74.1881	74.2417	74.3667	74.2701	74.3647	81.1966	112.533	117.545	98.5776	76.4211	74.4669	74.4602	74.3716	74.5067	74.6018	74.4587	128.843	150.578	149.64	139.58	144.877	195.992	177.186	113.809	73.8678	73.5824	78.9059
1883	0.2		0.8	73.1353	74.3595	74.7195	80.2478	76.5698	73.8768	71.8369	72.016	72.4653	72.9418	72.5252	71.9501	71.9547	75.2225	73.3124	71.9763	72.1839	79.2236	73.9783	73.9805	71.8243	72.7782	72.0438	73.7816	78.5122	78.076	74.0606	73.0814	73.3882	72.6087	72.4269	72.3629	72.3795	72.723	72.4972	74.7403	84.7008	96.9424	108.756	110.767	101.941	92.8509	78.5364	71.4989	72.1085	71.7314
895	0.15		1	203.635	200.729	196.918	194.273	188.197	182.102	172.351	165.307	164.187	161.341	160.734	158.395	155.179	152.792	149.579	147.628	144.439	141.404	137.844	134.544	132.019	130.399	129.413	130.422	130.175	129.388	127.249	126.594	126.695	129.727	126.231	120.054	116.597	120.038	122.275	123.479	125.588	125.038	125.473	129.442	129.495	127.714	127.019	121.418	116.175	114.52
1093	0.6		2	238.501	237.356	234.664	234.43	239.625	240.341	234.954	227.475	220.88	219.162	217.253	216.612	213.559	211.477	214.156	212.815	217.435	236.425	238.567	235.344	231.256	232.567	239.415	238.052	235.783	256.579	262.743	261.61	269.713	290.179	286.746	280.194	273.045	266.924	262.975	279.627	284.491	284.504	287.977	288.898	307.863	316.203	312.598	304.63	296.282	289.518
1709	0.2		1	51.5544	51.8793	68.593	90.5902	95.6929	88.6315	86.2859	84.5147	79.0489	67.5267	59.287	63.7384	57.631	64.5866	94.3179	119.219	147.304	190.393	182.578	164.454	146.865	123.014	109.459	99.4682	105.771	128.558	157.677	177.903	161.028	166.255	159.918	142.371	120.568	99.675	84.2804	88.3512	78.8818	71.5905	76.0052	92.8328	109.866	111.864	105.965	101.476	83.3687	67.5155
1017	0.35		0.95	50.5605	52.4853	58.1327	68.3552	69.6761	67.7878	62.5166	57.2239	52.5951	50.6227	50.5588	50.5133	50.5744	50.5123	50.5264	50.7407	59.6468	74.9654	81.1762	88.16	83.6783	78.5702	82.2933	82.2149	83.0805	116.672	134.71	143.018	150.617	147.453	136.675	126.51	139.096	135.518	124.658	187.074	225.053	220.923	211.217	217.034	285.057	279.272	249.097	215.562	181.927	150.42
[truncated: 434 more columns]
