# Supplementary material for: The value of observed reservoir storage anomalies for improving the simulation of reservoir dynamics in large-scale hydrological models
Source: Copernicus journal article supplement (doi:10.5194/hess-29-4073-2025), 2025-09-03
Supplement: Supplementary file 6 [file DH_results.xlsx]

## Sheet: Readme
	Sheet name	Note	Inflow source	Total number of reservoirs	Number of reservoirs where downstream demand is taken into account
	Outflow(WG inflow-No Demand)	Simulated outflow (×106 m3/month) where downstream demand is not considered for irrigation and supply reservoirs.	WaterGAP	100	0
	Storage(WG inflow-No Demand)	Simulated storage (×106 m3) where downstream demand is not considered for irrigation and supply reservoirs.	WaterGAP	100	0
	Outflow(WG inflow-With Demand)	Simulated outflow (×106 m3/month) where downstream demand is considered for irrigation and supply reservoirs.	WaterGAP	21	21
	Storage(WG inflow-With Demand)	Simulated storage (×106 m3) where downstream demand is considered for irrigation and supply reservoirs.	WaterGAP	21	21
	Outflow(OBS inflow-With Demand)	Simulated outflow (×106 m3/month) where downstream demand is considered for irrigation reservoirs.	Observed	35	2
	Storage(OBS inflow-With Demand)	Simulated storage (×106 m3) where downstream demand is considered for irrigation reservoirs.	Observed	35	2
	Note: The manuscript uses results from the default approach of Hanasaki, which considers water demand solely for irrigation resources.

## Sheet: Outflow(WG inflow-No Demand)
grand_id	a1	a3	1980-01	1980-02	1980-03	1980-04	1980-05	1980-06	1980-07	1980-08	1980-09	1980-10	1980-11	1980-12	1981-01	1981-02	1981-03	1981-04	1981-05	1981-06	1981-07	1981-08	1981-09	1981-10	1981-11	1981-12	1982-01	1982-02	1982-03	1982-04	1982-05	1982-06	1982-07	1982-08	1982-09	1982-10	1982-11	1982-12	1983-01	1983-02	1983-03	1983-04	1983-05	1983-06	1983-07	1983-08	1983-09	1983-10	1983-11
610	0.85	0.5	2204.19	4583.12	3663.81	2124	3935.16	4905.99	2053.4	1500.43	1484.12	1556.25	1510.86	1555.91	1541.14	1378.83	1864.78	1615.11	1464.7	1417.45	1464.7	1443.88	1397.3	1443.88	1397.3	1443.88	1443.88	1304.15	1443.88	1397.3	1443.88	1397.3	1443.88	1255.75	1215.24	1255.75	1215.24	1255.75	1255.75	1134.22	1255.75	1215.24	1255.75	1215.24	1255.75	1265.52	1224.69	1265.52	1224.69
753	0.85	0.5	1660.26	1499.59	1660.26	1606.71	1660.26	1606.71	1659.51	1659.51	1605.97	1659.51	1605.97	1659.51	1659.51	1498.91	1659.51	1605.97	1659.51	1605.97	1562.49	1562.49	1512.09	1562.49	1512.09	1562.49	1562.49	1411.28	1562.49	1512.09	1562.49	1640.23	2200.64	1787.85	1730.17	1787.85	1730.17	1787.85	1791.08	1871.61	2368.06	2376.44	3026.16	3278.76	1836.29	1785.99	1728.38	1785.99	1728.38
870	0.85	0.5	2084.86	1883.1	2084.86	2017.61	2084.86	2017.61	2084.86	2084.85	2017.6	2084.85	2017.6	2084.85	2084.85	1883.09	2084.85	2017.6	2084.85	2017.6	2084.85	1968.31	1904.81	1968.31	1904.81	1968.31	1968.31	1777.83	1968.31	1904.81	1968.31	1904.81	1968.31	2189.88	2119.24	2189.88	2119.24	2322.27	2336.28	2034.4	2602.6	2712	2668.52	2256.13	2189.88	2232.77	2160.75	2232.77	2271.17
597	0.85	0.5	1290.56	1165.66	1290.56	3174.76	6398.19	3648.5	1333.11	1290.56	1248.93	1290.56	1248.93	1290.56	1290.56	1165.66	1290.56	1248.93	1290.56	1248.93	972.994	972.994	941.607	972.994	941.607	972.994	972.994	878.833	972.994	941.607	972.994	941.607	897.633	897.633	868.677	897.633	868.677	897.633	897.633	810.765	897.633	868.677	897.633	2244.91	1587.53	1291.82	1250.15	1291.82	1250.15
307	0.85	0.5	343.586	310.336	343.586	332.502	343.586	332.502	326.151	326.151	315.63	326.151	315.63	326.151	326.151	294.588	326.151	315.63	326.151	315.63	396.023	396.023	383.248	396.023	383.248	396.023	396.023	357.698	396.023	383.248	396.023	383.248	579.792	533.537	516.326	533.537	516.326	533.537	533.537	481.904	533.537	531.435	615.255	535.144	533.134	533.134	515.936	533.134	515.936
1753	0.85	0.5	8993.75	8658.72	18704.9	10853.5	5705.56	3667.23	2737.39	2310.94	1966.43	2187.88	1949.79	2551.43	2557.03	7175.23	5869.37	5369.52	2938.54	2772.97	1896.69	1431.2	1218.12	1069.83	983.171	2125.82	12166.6	11534	8915.48	5641.42	3729.3	2618.5	2330.13	2118.08	2041.97	1775.04	1675.27	12160.1	8528.44	9582.5	7359.42	11294.7	11283.5	4677.32	2929.69	2332.5	1928.69	1763.31	2359.15
297	0.85	0.5	902.568	815.223	902.568	873.453	902.568	948.247	903.504	902.55	873.435	902.55	873.435	902.55	902.55	815.206	902.55	873.435	902.55	1667.59	1998.05	941.715	909.14	939.445	909.14	939.445	939.445	848.531	939.445	909.14	939.445	909.14	939.445	658.579	637.334	658.579	637.334	658.579	658.579	594.845	658.579	637.334	658.579	637.334	658.579	861.553	833.761	861.553	833.761
1036	0.85	0.5	336.37	303.818	336.37	325.519	336.37	324.5	335.317	335.317	324.5	335.317	324.5	335.317	335.317	302.867	335.317	324.5	335.317	200.952	207.651	207.651	200.952	207.651	200.952	207.651	207.651	187.556	207.651	200.952	207.651	311.408	321.788	321.788	311.408	321.788	311.408	321.788	321.788	290.647	321.788	311.408	487.028	664.96	687.126	687.126	664.96	687.126	664.96
989	0.85	0.5	888.999	802.967	888.999	860.321	888.999	860.321	148.784	148.784	143.985	148.784	143.985	148.784	148.784	134.386	148.784	143.985	148.784	143.985	812.164	812.164	785.965	812.164	785.965	812.164	812.164	733.567	812.164	785.965	812.164	785.965	940.658	940.658	910.314	940.658	910.314	940.658	940.658	849.626	940.658	910.314	1115.64	910.314	1034.75	1034.75	1001.37	1034.75	1001.37
1135	0.85	0.5	209.466	189.195	209.466	202.709	209.466	202.709	208.203	208.203	201.487	208.203	201.487	208.203	208.203	188.055	208.203	201.487	208.203	201.487	267.649	267.649	259.015	267.649	259.015	267.649	267.649	241.747	267.649	259.015	336.212	1332.57	796.934	659.676	638.396	659.676	638.396	659.676	659.676	595.836	659.676	638.396	659.676	638.396	425.53	425.53	411.803	425.53	411.803
1269	0.85	0.5	477.071	430.903	477.071	461.682	477.071	461.529	476.913	476.913	461.529	476.913	461.529	476.913	476.913	430.76	476.913	461.529	476.913	134.261	138.737	138.737	134.261	138.737	134.261	138.737	138.737	125.31	138.737	134.261	138.737	305.507	315.69	315.69	305.507	315.69	305.507	315.69	315.69	285.14	315.69	587.442	747.182	600.938	620.553	620.553	600.535	620.553	600.535
1077	0.85	0.5	293.736	265.31	293.736	284.261	293.736	284.261	249.579	249.579	241.528	249.579	241.528	249.579	249.579	225.426	249.579	241.528	249.579	241.528	100.665	100.665	97.4181	100.665	97.4181	100.665	100.665	90.9235	100.665	97.4181	893.052	1205.19	617.014	614.689	594.861	614.689	594.861	614.689	614.689	555.203	614.689	594.861	614.689	594.861	443.712	443.712	429.398	443.712	429.398
1026	0.85	0.5	206.852	186.834	206.852	200.18	206.852	197.022	203.589	203.589	197.022	203.589	197.022	203.589	203.589	183.887	203.589	197.022	203.589	157.604	162.857	162.857	157.604	162.857	157.604	162.857	162.857	147.097	162.857	157.604	162.857	357.799	369.725	369.725	357.799	369.725	357.799	369.725	369.725	333.945	369.725	357.799	369.725	401.612	414.999	414.999	401.612	414.999	401.612
740	0.85	0.5	6.41251	5.79195	6.41251	6.20566	6.01241	5.81846	6.01241	6.01241	5.81846	6.01241	5.81846	6.01241	6.01241	5.43057	6.01241	5.81846	5.5775	5.39758	5.5775	5.5775	5.39758	5.5775	5.39758	5.5775	5.5775	5.03774	5.5775	5.39758	5.6761	5.493	5.6761	5.6761	5.493	5.6761	5.493	5.6761	5.6761	5.1268	5.6761	5.493	5.67016	5.48725	5.67016	5.67016	5.48725	5.67016	5.48725
1294	0.85	0.5	48.0836	43.4303	48.0836	46.5325	48.0836	46.5325	45.7455	45.7455	44.2699	45.7455	44.2699	45.7455	45.7455	41.3185	45.7455	44.2699	45.7455	44.2699	104.143	104.143	100.783	104.143	100.783	104.143	104.143	94.0646	104.143	100.783	104.143	100.783	132.337	132.337	128.069	132.337	128.069	132.337	132.337	119.531	132.337	128.069	132.337	128.069	112.194	112.194	108.575	112.194	108.575
1848	0.85	0.5	155.459	140.415	155.459	150.445	154.97	149.971	154.97	154.97	149.971	154.97	149.971	154.97	154.97	139.973	154.97	149.971	112.055	108.44	112.055	112.055	108.44	112.055	108.44	112.055	112.055	101.211	112.055	108.44	113.007	109.362	113.007	113.007	109.362	113.007	109.362	113.007	113.007	102.071	113.007	109.362	184.815	163.221	168.662	168.662	163.221	168.662	163.221
1869	0.85	0.5	290.714	262.581	290.714	658.909	290.714	281.337	290.714	290.714	281.337	290.714	281.337	290.714	290.714	262.581	290.714	281.337	88.9754	86.1052	88.9754	88.9754	86.1052	88.9754	86.1052	88.9754	88.9754	80.3649	88.9754	86.1052	154.155	149.182	154.155	154.155	149.182	154.155	149.182	154.155	449.917	805.52	516.476	866.236	865.671	281.488	290.871	290.871	281.488	290.871	281.488
1863	0.85	0.5	128.64	116.191	334.057	132.871	128.64	124.49	128.64	128.64	124.49	128.64	124.49	128.64	128.64	116.191	128.64	124.49	99.7005	96.4844	99.7005	99.7005	96.4844	99.7005	96.4844	99.7005	99.7005	90.0521	99.7005	96.4844	103.637	100.294	103.637	103.637	100.294	103.637	100.294	103.637	103.637	93.6075	103.637	100.294	114.828	111.124	114.828	114.828	111.124	114.828	111.124
1770	0.85	0.5	112.013	101.173	112.013	108.4	111.227	107.639	111.227	111.227	107.639	111.227	107.639	111.227	111.227	100.463	111.227	107.639	86.258	83.4755	86.258	86.258	83.4755	86.258	83.4755	86.258	86.258	77.9104	86.258	83.4755	108.549	105.047	108.549	108.549	105.047	108.549	105.047	108.549	108.549	98.0442	108.549	105.047	103.207	99.8777	103.207	103.207	99.8777	103.207	99.8777
965	0.85	0.5	104.797	94.6557	104.797	101.417	104.797	101.417	104.326	104.326	100.96	104.326	100.96	104.326	104.326	94.2297	104.326	100.96	104.326	100.96	63.9987	63.9987	61.9342	63.9987	61.9342	63.9987	63.9987	57.8052	63.9987	61.9342	63.9987	61.9342	96.7023	96.7023	93.5829	96.7023	93.5829	96.7023	96.7023	87.344	96.7023	93.5829	123.376	223.716	124.489	120.606	116.716	120.606	116.716
1247	0.85	0.5	113.978	102.948	113.978	110.302	113.978	110.302	113.866	113.866	110.193	113.866	110.193	113.866	113.866	102.847	113.866	110.193	113.866	110.193	133.159	133.159	128.863	380.413	174.585	162.975	146.393	175.225	166.9	129.006	470.373	349.824	195.839	160.04	154.877	160.04	154.877	160.04	160.04	144.552	160.04	154.877	160.04	154.877	129.82	129.82	125.633	129.82	125.633
7313	0.85	0.5	477.51	431.299	477.51	462.106	477.51	462.106	385.165	385.165	372.741	385.165	372.741	385.165	385.165	347.891	385.165	372.741	385.165	689.85	477.617	477.617	462.21	477.617	462.21	477.617	477.617	431.396	477.617	462.21	1460.83	1109.29	495.501	479.103	463.648	479.103	463.648	479.103	479.103	432.738	479.103	463.648	735.869	570.125	476.775	476.775	461.395	476.775	461.395
1287	0.85	0.5	591.275	584.217	483.223	452.475	492.929	404.469	346.804	308.066	275.664	428.964	303.921	365.89	298.441	275	359.359	332.236	372.138	1127.42	488.357	392.408	352.59	937.889	720.286	537.16	409.189	540.496	467.654	453.646	918.602	784.642	660.967	589.323	524.376	519.479	522.263	1014.33	696.1	985.597	1031.87	716.543	807.14	625.055	500.935	454.832	409.8	407.67	379.318
1186	0.85	0.5	81.4461	73.5642	81.4461	78.8188	80.7476	78.1429	80.7476	80.7476	78.1429	80.7476	78.1429	80.7476	80.7476	72.9333	80.7476	78.1429	53.0788	51.3665	53.0788	53.0788	51.3665	53.0788	51.3665	53.0788	53.0788	47.9421	53.0788	51.3665	53.421	51.6978	53.421	53.421	51.6978	53.421	51.6978	53.421	53.421	48.2513	53.421	51.6978	71.2082	68.9112	71.2082	71.2082	68.9112	71.2082	68.9112
1042	0.85	0.5	30.6531	27.6867	30.6531	29.6643	27.8127	26.9155	27.8127	27.8127	26.9155	27.8127	26.9155	27.8127	27.8127	25.1211	27.8127	26.9155	21.9438	21.2359	21.9438	21.9438	21.2359	21.9438	21.2359	21.9438	21.9438	19.8202	21.9438	21.2359	28.9834	28.0484	28.9834	28.9834	28.0484	28.9834	28.0484	28.9834	28.9834	26.1785	28.9834	28.0484	42.5408	41.1685	42.5408	42.5408	41.1685	42.5408	41.1685
884	0.85	0.5	2774.24	2505.65	2781.34	2696.29	2779.86	2693.7	2773.16	2177.71	2100.89	2171.02	2101.04	2171.34	2171.66	1961.35	2172.32	2102.76	2172.33	2101.76	2171.5	1947.26	1881.61	1944.22	1881.34	1944.06	1944.05	1759.04	1977.87	1903.25	1976.78	1911.84	1960.87	2255.75	2184.57	2257.48	2183.73	2255.54	2254.86	2035.61	2264.11	2198.82	2274.8	2189.92	2260.08	2420.38	2342.05	2419.05	2340.52
1273	0.85	0.5	26.4355	23.8773	26.4355	25.5828	26.4355	25.5828	23.3515	23.3515	22.5983	23.3515	22.5983	23.3515	23.3515	21.0917	23.3515	22.5983	23.3515	22.5983	23.9487	23.9487	23.1762	23.9487	23.1762	23.9487	23.9487	21.6311	23.9487	23.1762	23.9487	23.1762	34.6805	34.6805	33.5618	34.6805	33.5618	34.6805	34.6805	31.3243	34.6805	33.5618	34.6805	33.5618	34.0064	34.0064	32.9095	34.0064	32.9095
961	0.85	0.5	0	0	0	0	0	0	0	0	0	0	0	0	0	0	0	0	0	0	0	0	0	0	0	0	0	0	0	0	0	0	0	0	0	0	0	0	0.331933	0.29981	0.331933	3.01952	3.31933	6.32368	6.53446	6.53446	6.32368	6.53446	6.32368
1144	0.85	0.5	1273.59	1526.35	1130.19	1055.27	1208.93	877.659	608.255	458.798	427.038	1365.44	878.832	1307.06	838.16	831.588	1027.54	809.656	898.573	1889.15	985.951	766.484	635.047	2004.23	1824.87	1273.99	1006.9	2305.37	1472.68	967.153	2306.55	2886.95	1594.9	1090.02	896.254	851.805	874.537	4033.73	1589.76	1937.98	1805.44	1347.89	1742.75	1193.9	1116.36	880.39	754.376	739.719	702.906
616	0.85	0.5	1732.13	3800.78	3841.16	2106.09	3368.99	4717.97	2178.22	1720.04	1665.8	1723.45	1669.34	1726.01	1726.66	1559.85	1727.35	1669.96	1723.59	1664.9	1718.87	1602.37	1542.76	1595.56	1545.73	1598.36	1599.21	1444.73	1599.5	1546.7	1595.81	1541.45	1591.22	1350.39	1273.19	1317.39	1276.19	1319.74	1319.87	1192.33	1320.28	1277.03	1317.59	1272.44	1313.5	1288.45	1245.4	1288.86	1248.97
911	0.85	0.5	508.443	424.489	537.635	554.095	391.692	383.561	293.447	257.504	251.634	236.98	219.546	229.032	218.4	226.773	230.463	226.711	208.547	194.575	133.275	114.392	104.212	99.3852	110.3	153.979	116.77	495.07	848.024	644.821	871.966	553.873	656.958	535.991	486.066	504.432	625.078	967.407	675.08	1121.48	2025.7	2400.67	1373.9	998.527	1002.6	674.697	564.988	575.075	933.28
1006	0.85	0.5	30.1357	27.2194	30.1357	29.1636	30.1357	27.2568	28.1654	28.1654	27.2568	28.1654	27.2568	28.1654	28.1654	25.4397	28.1654	27.2568	28.1654	22.9744	23.7402	23.7402	22.9744	23.7402	22.9744	23.7402	23.7402	21.4428	23.7402	22.9744	23.7402	37.869	39.1313	39.1313	37.869	39.1313	37.869	39.1313	39.1313	35.3444	39.1313	37.869	39.1313	49.37	51.0157	51.0157	49.37	51.0157	49.37
1048	0.85	0.5	488.635	776.718	878.331	1406.09	1257.98	1044.66	646.266	557.799	487.409	478.395	445.067	451.11	437.586	392.145	440.377	407.659	380.197	394.33	214.289	201.994	185.529	192.161	402.789	352.304	313.165	745.496	474.727	363.621	909.362	1084.73	646.388	528.8	443.898	409.992	366.523	404.641	374.471	521.271	736.398	1002.99	836.929	833.288	648	557.255	490.128	664.43	551.76
1123	0.85	0.5	45.6	41.1871	45.6	44.1291	45.6	42.8976	44.3276	44.3276	42.8976	44.3276	42.8976	44.3276	44.3276	40.0378	44.3276	42.8976	44.3276	40.5997	41.953	41.953	40.5997	41.953	40.5997	41.953	41.953	37.893	41.953	40.5997	41.953	47.926	49.5235	49.5235	47.926	49.5235	47.926	49.5235	49.5235	44.7309	49.5235	47.926	49.5235	56.264	58.1395	58.1395	56.264	58.1395	56.264
1032	0.85	0.5	153.542	225.126	321.609	311.234	321.609	171.179	29.8467	30.7392	29.7476	30.7392	29.7476	30.7392	30.7392	27.7644	30.7392	29.7476	30.7392	29.7476	136.22	136.22	131.826	136.22	131.826	136.22	136.22	123.037	136.22	131.826	136.22	131.826	315.713	315.713	305.529	315.713	305.529	315.713	315.713	285.16	315.713	305.529	315.713	305.529	230.852	230.852	223.405	230.852	223.405
1774	0.85	0.5	363.433	328.262	363.433	351.709	363.433	316.882	327.445	327.445	316.882	327.445	316.882	327.445	327.445	229.211	327.445	316.882	327.445	62.1446	64.2161	64.2161	62.1446	64.2161	62.1446	64.2161	64.2161	539.731	850.423	312.081	210.584	353.6	365.387	365.387	353.6	365.387	353.6	365.387	365.387	330.027	365.387	407.821	526.1	353.407	365.187	365.187	353.407	365.187	353.407
1781	0.85	0.5	732.093	582.438	1224.56	738.835	463.763	331.721	303.313	270.179	245.998	245.992	236.758	260.601	285.032	696.418	565.988	556.145	221.015	246.765	158.788	134.463	119.852	115.201	106.911	135.194	632.202	963.861	764.364	369.195	431.169	374.555	335.679	351.727	295.984	294.689	360.373	788.403	631.8	1067.23	1072.17	1260.78	606.255	414.72	362.173	327.023	298.897	298.279	328.231
355	0.85	0.5	216.348	195.411	216.348	209.369	216.348	209.369	183.479	183.479	177.56	183.479	177.56	183.479	183.479	165.723	183.479	177.56	214.452	266.61	256.668	256.668	248.388	256.668	248.388	256.668	256.668	194.571	182.151	248.388	256.668	248.388	116.677	116.677	112.913	116.677	112.913	116.677	116.677	105.386	116.677	204.986	1499.91	529.42	261.798	261.798	253.353	261.798	253.353
1101	0.85	0.5	133.144	120.259	133.144	128.849	133.144	128.846	133.141	133.141	128.846	133.141	128.846	133.141	133.141	120.257	133.141	128.846	133.141	64.9042	67.0677	67.0677	64.9042	67.0677	64.9042	67.0677	67.0677	60.5773	67.0677	64.9042	67.0677	81.0191	83.7198	83.7198	81.0191	83.7198	81.0191	83.7198	83.7198	75.6179	119.175	348.532	425.39	153.603	158.723	158.723	153.603	158.723	153.603
1023	0.85	0.5	279.699	252.632	691.258	1086.8	1009	800.237	306.386	279.699	270.677	279.699	270.677	279.699	279.699	252.632	279.699	270.677	279.699	270.677	119.066	119.066	115.225	119.066	115.225	119.066	119.066	107.543	119.066	115.225	119.066	115.225	111.689	111.689	108.086	111.689	108.086	111.689	111.689	100.881	111.689	108.086	111.689	202.672	279.089	279.089	270.086	279.089	270.086
1060	0.85	0.5	34.3402	31.017	34.3402	33.2325	34.3402	33.2325	34.2854	34.2854	33.1795	34.2854	33.1795	34.2854	34.2854	30.9675	34.2854	33.1795	34.2854	33.1795	36.0408	36.0408	34.8782	36.0408	34.8782	36.0408	36.0408	32.553	36.0408	34.8782	36.0408	34.8782	56.2243	56.2243	54.4106	56.2243	54.4106	56.2243	56.2243	50.7832	56.2243	54.4106	56.2243	54.4106	75.4447	75.4447	73.011	75.4447	73.011
1864	0.85	0.5	163.869	148.011	163.869	158.583	163.543	158.267	163.543	163.543	158.267	163.543	158.267	163.543	163.543	147.716	163.543	158.267	31.1982	30.1918	31.1982	31.1982	30.1918	31.1982	30.1918	31.1982	31.1982	28.179	31.1982	30.1918	103.983	100.629	103.983	103.983	100.629	103.983	100.629	346.264	274.216	361.265	236.231	529.631	468.902	169.38	175.026	175.026	169.38	175.026	169.38
1797	0.85	0.5	3552.47	2834.52	5361.21	2809.48	1808.44	1286.39	1157.51	1033.66	935.06	922.027	898.165	1009.98	1115.61	2904.23	2075.84	2335.47	1077.5	1218.25	629.674	519.514	447.981	418.082	391.948	804.362	3208.88	4023.49	3345.47	1408.04	1301.05	1202.42	1106.51	1102.96	1008.15	979.376	1243.52	3467.11	2298.3	3572.78	2949.7	3436.08	2358.31	1401.72	1090.16	955.203	842.093	817.289	880.273
305	0.85	0.5	1671.15	1269.65	1774.15	2132.16	3592.14	3479.86	2069.03	1143.46	1415.33	1434.61	1750.38	2288.6	1828.13	2081.63	1750.7	2203.55	2811.87	3195.61	1611.54	1032.55	1007.62	1544.82	1582.5	2077.99	1429.72	2851.72	3007.15	2948.94	2932.88	2722.52	2111.45	1082.93	1191.54	1895	1714.52	1903.64	2336.66	1841.8	2125.08	1752.81	1940.39	1737.13	2153.15	1352.72	1366.96	1363.61	1853.95
968	0.85	0.5	79.799	72.0765	79.799	407.496	224.523	109.805	79.799	79.799	77.2249	79.799	77.2249	79.799	79.799	72.0765	79.799	77.2249	79.799	77.2249	71.7372	71.7372	69.4231	71.7372	69.4231	71.7372	71.7372	64.7949	71.7372	69.4231	71.7372	69.4231	70.4462	70.4462	68.1737	70.4462	68.1737	70.4462	70.4462	63.6288	70.4462	68.1737	70.4462	68.1737	70.6138	70.6138	68.336	70.6138	68.336
1019	0.85	0.5	20.1976	18.243	20.1976	19.546	20.1976	18.1544	18.7595	18.7595	18.1544	18.7595	18.1544	18.7595	18.7595	16.9441	18.7595	18.1544	18.7595	15.6282	16.1491	16.1491	15.6282	16.1491	15.6282	16.1491	16.1491	14.5863	16.1491	15.6282	16.1491	19.1635	19.8023	19.8023	19.1635	19.8023	19.1635	19.8023	19.8023	17.8859	19.8023	19.1635	19.8023	27.7721	28.6978	28.6978	27.7721	28.6978	27.7721
1302	0.85	0.5	22.3599	20.196	22.3599	21.6386	22.3599	21.6386	21.0406	21.0406	20.3618	21.0406	20.3618	21.0406	21.0406	19.0044	21.0406	20.3618	21.0406	20.3618	35.8304	35.8304	34.6746	35.8304	34.6746	35.8304	35.8304	32.3629	35.8304	34.6746	35.8304	34.6746	28.3269	28.3269	27.4132	28.3269	27.4132	28.3269	28.3269	25.5856	28.3269	27.4132	28.3269	27.4132	24.7839	24.7839	23.9845	24.7839	23.9845
1824	0.85	0.5	8252.64	6964.69	17606.7	7949.01	4844.45	2823.86	2207.89	1844.58	1583.21	1838.67	1793.92	1899.26	2167.05	6765.82	4627.96	4739.09	2271.93	2129.33	1347.86	1089.41	852.73	739.558	666.183	1911.69	11435.8	9821.78	7426.9	4567.28	2893.37	2200.63	1930.77	1808.75	1579.21	1453.12	1508.68	11121.5	6188.57	8388	6684.79	9888.08	8145.32	3407.91	2294.82	1826.07	1495.65	1350.98	2124.17
1316	0.85	0.5	0	0	0	0	0	0	0	0	0	0	0	0	0.111258	0.100491	0.111258	0.107669	0.854172	1.07669	1.11258	1.11258	1.07669	1.11258	1.07669	1.11258	2.78177	2.51257	2.78177	2.69204	2.78177	2.69204	2.78177	2.78177	2.69204	2.78177	2.69204	2.78177	1.70119	1.53656	1.70119	1.64631	1.70119	1.64631	1.70119	0.367677	0.164631	0.170119	0.164631
1835	0.85	0.5	7199.29	6057.53	14653.5	6424.19	4029.73	2426.39	1946.72	1650.05	1473.41	1539.98	1399.29	1584.82	1815.58	5930.06	3982.94	4178.01	1928.37	1922.03	1131.71	916.93	734.895	645.832	596.974	1825.72	9086.03	8853.7	6459.27	3539.89	2440.82	1931.89	1713.51	1633.11	1441.73	1336.29	1469.28	8581.35	4980.8	7008.27	5500.07	7468.58	6099.76	2850.27	1944.85	1572.4	1307	1194.88	1992
1847	0.85	0.5	5960.97	5000.99	11496	5296.06	3065.39	2016.62	1636.92	1397.87	1219.28	1173.33	1173.03	1376.31	1489.38	4931.29	3331.71	3614.72	1665.12	1743.64	975.56	765.2	627.376	561.658	512.002	1362.61	6758.87	7641.9	5601.8	2625.76	1995.55	1623.78	1445.09	1393.6	1238.9	1166.25	1357.15	6641.79	3915.12	5773.36	4463.25	5813.62	4254.28	2366.65	1632.71	1347.22	1134.35	1051.53	1356.64
1231	0.85	0.5	42.6908	38.5595	42.6908	41.3137	42.6908	41.249	42.6239	42.6239	41.249	42.6239	41.249	42.6239	42.6239	38.499	42.6239	41.249	42.6239	22.0366	22.7712	22.7712	22.0366	22.7712	22.0366	22.7712	22.7712	20.5675	22.7712	22.0366	22.7712	58.1349	60.0727	60.0727	58.1349	60.0727	58.1349	60.0727	60.0727	54.2592	60.0727	58.1349	60.0727	68.7327	71.0238	71.0238	68.7327	71.0238	68.7327
1140	0.85	0.5	4.09449	3.69825	4.09449	3.96241	4.09449	3.96241	3.90254	3.90254	3.77666	3.90254	3.77666	3.90254	3.90254	3.52488	3.90254	3.77666	3.90254	3.77666	3.72179	3.72179	3.60173	3.72179	3.60173	3.72179	3.72179	3.36162	3.72179	3.60173	3.72179	3.60173	3.58147	3.58147	3.46594	3.58147	3.46594	3.58147	3.58147	3.23488	3.58147	3.46594	3.58147	3.46594	3.48835	3.48835	3.37582	3.48835	3.37582
1296	0.85	0.5	16.1741	14.6089	16.1741	15.6523	15.0021	14.5181	15.0021	15.0021	14.5181	15.0021	14.5181	15.0021	15.0021	13.5502	15.0021	14.5181	12.8502	12.4357	12.8502	12.8502	12.4357	12.8502	12.4357	12.8502	12.8502	11.6067	12.8502	12.4357	13.8925	13.4444	13.8925	13.8925	13.4444	13.8925	13.4444	13.8925	13.8925	12.5481	13.8925	13.4444	16.6491	16.112	16.6491	16.6491	16.112	16.6491	16.112
1659	0.85	0.5	24.2945	21.9434	24.2945	23.5108	24.2945	22.4839	23.2334	23.2334	22.4839	23.2334	22.4839	23.2334	23.2334	20.985	23.2334	22.4839	23.2334	21.6614	22.3834	22.3834	21.6614	22.3834	21.6614	22.3834	22.3834	20.2173	22.3834	21.6614	22.3834	33.6164	34.7369	34.7369	33.6164	34.7369	33.6164	34.7369	34.7369	31.3753	34.7369	33.6164	34.7369	34.9668	36.1324	36.1324	34.9668	36.1324	34.9668
1277	0.85	0.5	8.9175	8.05452	8.9175	8.62984	8.9175	8.62984	8.24974	8.24974	7.98362	8.24974	7.98362	8.24974	8.24974	7.45137	8.24974	7.98362	8.24974	7.98362	8.35144	8.35144	8.08204	8.35144	8.08204	8.35144	8.35144	7.54324	8.35144	8.08204	8.35144	8.08204	7.73485	7.73485	7.48534	7.73485	7.48534	7.73485	7.73485	6.98632	7.73485	7.48534	7.73485	7.48534	7.39932	7.39932	7.16063	7.39932	7.16063
1021	0.85	0.5	82.4811	74.499	82.4811	81.7697	100.405	79.8204	82.4811	82.4811	79.8204	82.4811	79.8204	82.4811	82.4811	74.499	82.4811	79.8204	82.4811	28.8329	29.7939	29.7939	28.8329	29.7939	28.8329	29.7939	29.7939	26.9107	29.7939	28.8329	29.7939	59.5573	61.5425	61.5425	59.5573	61.5425	59.5573	61.5425	61.5425	55.5868	61.5425	151.446	121.985	112.508	82.6618	82.6618	79.9952	82.6618	79.9952
1280	0.85	0.5	58.5674	52.8996	58.5674	56.6709	58.5599	56.6709	58.5599	58.5599	56.6709	58.5599	74.7009	148.843	124.271	82.2071	150.791	74.8329	69.2713	66.8052	69.0321	69.0321	66.8052	69.0321	66.8052	69.0321	69.0321	62.3515	69.0321	46.6447	48.1995	46.6447	48.1995	48.1995	46.6447	48.1995	46.6447	48.1995	48.1995	43.535	48.1995	27.4004	28.3137	27.4004	28.3137	28.3137	27.4004	28.3137	27.4004
1120	0.85	0.5	8.99669	8.12604	8.99669	8.70648	8.99669	8.70648	8.06907	8.06907	7.80877	8.06907	7.80877	8.06907	8.06907	7.28819	8.06907	7.80877	8.06907	7.80877	6.99094	6.99094	6.76543	6.99094	6.76543	6.99094	6.99094	6.3144	6.99094	6.76543	6.99094	6.76543	7.12487	7.12487	6.89503	7.12487	6.89503	7.12487	7.12487	6.43536	7.12487	6.89503	7.12487	6.89503	7.58327	7.58327	7.33865	7.58327	7.33865
182	0.85	0.5	129.882	340.71	236.01	125.692	129.877	125.687	129.877	129.877	125.687	129.877	125.687	129.877	129.877	94.6843	129.877	125.687	29.3618	28.4147	29.3618	29.3618	28.4147	29.3618	28.4147	29.3618	63.7853	476.703	408.012	488.086	161.466	128.065	132.334	132.334	128.065	132.334	128.065	302.137	387.412	509.218	695.356	290.288	161.713	129.255	133.564	133.564	129.255	133.564	129.255
7311	0.85	0.5	19.4853	17.5996	19.4853	18.8567	19.4853	18.8567	18.5429	18.5429	17.9447	18.5429	17.9447	18.5429	18.5429	16.7484	18.5429	17.9447	18.5429	17.9447	13.2671	13.2671	12.8391	13.2671	12.8391	13.2671	13.2671	11.9832	13.2671	12.8391	13.2671	12.8391	18.9783	18.9783	18.3661	18.9783	18.3661	18.9783	18.9783	17.1417	18.9783	18.3661	18.9783	18.3661	23.6239	23.6239	22.8618	23.6239	22.8618
1755	0.85	0.5	49.1201	44.3665	49.1201	47.5355	49.12	47.5355	49.12	49.12	47.5355	49.12	47.5355	49.12	49.12	44.3665	49.12	47.5355	37.9602	36.7356	37.9602	37.9602	36.7356	37.9602	36.7356	37.9602	37.9602	34.2866	37.9602	36.7356	80.3841	77.7911	80.3841	80.3841	77.7911	80.3841	77.7911	80.3841	80.3841	72.605	80.3841	77.7911	104.594	82.591	65.8912	65.8912	63.7656	65.8912	63.7656
1152	0.85	0.5	0	0	0	0	0	0	0	0	0	0	0	0	0	0	0	0	0	0	0	0	0	0	0	0	0	0	0	0	0	0	0	0	0	0	0	0	0	0	0	0	0	0	0	0	0	0	0
1192	0.85	0.5	228.993	236.871	226.389	226.915	233.634	166.133	154.764	147.082	139.09	143.278	138.96	144.839	144.934	132.901	149.08	143.542	144.388	133.468	110.97	95.7766	88.672	91.0108	93.0973	96.8528	100.987	112.855	114.263	101.102	99.4259	143.172	143.004	139.897	133.595	137.751	135.249	246.954	187.595	221.163	195.347	172.215	168.668	153.226	150.614	144.418	136.549	139.899	135.306
541	0.85	0.5	153.083	98.2694	24.197	37.0362	520.71	441.094	153.083	153.083	148.145	153.083	148.145	153.083	153.083	84.9364	19.7526	94.8127	153.083	148.145	67.1597	67.1597	64.9932	67.1597	64.9932	67.1597	47.6617	13.8652	14.5152	43.5455	237.13	244.337	154.455	154.455	149.473	154.455	149.473	154.455	154.455	45.34	19.9297	32.884	145.487	316.612	154.373	154.373	149.393	154.373	149.393
1822	0.85	0.5	5004.99	4044.14	8802.54	4294.37	2517.74	1705.52	1426.16	1236.13	1085.44	1052.35	1021.52	1227.6	1331.42	4246.18	2758.92	3098.45	1418.74	1548.26	827.276	656.225	546.628	495.372	458.052	1158.56	5313.67	6295.07	4808.06	2055.13	1685.2	1436.4	1292.64	1269.45	1146.03	1090.15	1382.48	5611.72	3273.22	4803.55	3841.03	4859.33	3279.87	1949.64	1391.35	1170.83	1002.54	944.263	1152.5
972	0.85	0.5	69.0955	62.4088	544.012	413.406	147.121	101.426	75.0144	69.0955	66.8666	69.0955	66.8666	69.0955	69.0955	62.4088	69.0955	66.8666	69.0955	66.8666	33.5708	33.5708	32.4879	33.5708	32.4879	33.5708	33.5708	30.3221	33.5708	32.4879	33.5708	32.4879	25.9572	25.9572	25.1199	25.9572	25.1199	25.9572	25.9572	23.4453	25.9572	25.1199	25.9572	25.1199	50.3263	50.3263	48.7029	50.3263	48.7029
613	0.85	0.5	185.742	220.489	257.554	401.324	1165.51	814.315	180.281	166.338	158.539	179.03	188.435	190.588	182.851	162.74	173.136	273.944	256.982	178.534	36.3218	17.9705	17.6938	24.7233	27.6374	26.1422	34.2511	46.5127	126.479	145.35	263.698	183.688	156.467	151.571	146.215	151.029	157.479	134.638	70.5994	111.043	289.807	315.687	384.878	332.733	159.635	149.697	140.208	147.316	158.312
1086	0.85	0.5	0.74661	0.674358	0.74661	0.613995	0.634462	0.613995	0.634462	0.634462	0.613995	0.634462	0.613995	0.634462	0.634462	0.573062	0.634462	0.511584	0.528636	0.511584	0.528636	0.528636	0.511584	0.528636	0.511584	0.528636	0.528636	0.477478	0.528636	0.365172	0.377344	0.365172	0.377344	0.377344	0.365172	0.377344	0.365172	0.377344	0.377344	0.340827	0.377344	0.328457	0.339406	0.328457	0.339406	0.339406	0.328457	0.339406	0.328457
1295	0.85	0.5	26.1624	23.6306	26.1624	25.3185	26.1624	25.2638	26.1059	26.1059	25.2638	26.1059	25.2638	26.1059	26.1059	23.5795	26.1059	25.2638	26.1059	17.3825	17.9619	17.9619	17.3825	17.9619	17.3825	17.9619	17.9619	16.2237	17.9619	17.3825	17.9619	37.3489	38.5939	38.5939	37.3489	38.5939	37.3489	38.5939	38.5939	34.859	73.3455	37.3489	103.297	52.4604	54.2091	54.2091	52.4604	54.2091	52.4604
1139	0.85	0.5	11.1387	10.0608	11.1387	10.7794	11.1387	10.7794	10.7032	10.7032	10.358	10.7032	10.358	10.7032	10.7032	9.66744	10.7032	10.358	10.7032	10.358	11.7793	11.7793	11.3993	11.7793	11.3993	11.7793	11.7793	10.6394	11.7793	11.3993	11.7793	54.6718	15.3008	14.7085	14.2341	14.7085	14.2341	14.7085	14.7085	13.2851	14.7085	14.2341	14.7085	14.2341	14.1778	14.1778	13.7204	14.1778	13.7204
1862	0.85	0.5	708.119	463.505	1545.29	435.115	317.855	190.067	162.737	140.861	124.298	160.163	182.124	170.534	164.051	714.722	269.687	282.876	114.779	163.457	91.2716	78.6684	65.9343	60.9609	53.7414	97.91	836.252	1006.51	338.993	390.164	180.303	146.704	127.881	127.308	102.37	120.598	218.06	854.8	382.962	674.553	566.123	582.031	285.412	188.027	155.141	134.67	123.057	117.334	439.179
629	0.85	0.5	2048.19	4352.11	3811.3	2151.63	3306.41	4757.05	2221.84	1752.3	1697.54	1754.19	1697.43	1753.55	1752.66	1582.19	1778.11	1680.52	1729.76	1666.4	1725.43	1576.41	1566.75	1616.61	1566.73	1624.6	1649.78	1495.06	1630.86	1556.7	1600.1	1543.2	1597.2	1411.26	1304.59	1349.2	1306.62	1520.43	1365.95	1307.48	1558.68	1309.48	1334.6	1283.72	1327.88	1600.97	1350.98	1475.2	1301.18
1000	0.85	0.5	26.1686	23.6362	26.1686	25.3245	26.1686	25.3078	26.1514	26.1514	25.3078	26.1514	25.3078	26.1514	26.1514	23.6206	26.1514	25.3078	26.1514	25.1461	25.9843	25.9843	25.1461	25.9843	25.1461	25.9843	25.9843	23.4697	25.9843	25.1461	25.9843	42.1981	43.6047	43.6047	42.1981	43.6047	42.1981	43.6047	43.6047	39.3849	43.6047	42.1981	43.6047	48.012	49.6124	49.6124	48.012	49.6124	48.012
7306	0.85	0.5	7459.78	6261.26	15226.1	6846.97	4269.39	2543.16	2015.99	1701.47	1473.21	1606.75	1445.53	1660.32	1900.37	6049.79	4123.15	4321.88	2024.77	1967.65	1186.32	977.614	766.475	668.461	610.797	1865.79	9589.46	9045.98	6784.66	3709.99	2566.31	1999.43	1769.86	1681.23	1479.04	1367.49	1439.84	8945.3	5289.78	7296.37	5786.77	7998.9	6585.35	3013.06	2034.96	1636.16	1353.68	1231.52	1962.34
991	0.85	0.5	68.1447	61.55	68.1447	65.9465	68.1447	65.9465	65.1787	65.1787	63.0762	65.1787	63.0762	65.1787	65.1787	58.8711	65.1787	30.9073	40.579	63.0762	10.7194	10.7194	10.3736	10.7194	10.3736	10.7194	10.7194	9.68201	10.7194	38.9055	100.529	179.513	98.2188	98.2188	95.0505	98.2188	95.0505	98.2188	98.2188	88.7138	98.2188	95.0505	98.2188	95.0505	71.8301	71.8301	69.513	71.8301	69.513
7317	0.85	0.5	84.054	75.9197	84.054	77.7934	80.3865	77.7934	80.3865	80.3865	77.7934	80.3865	77.7934	80.3865	80.3865	72.6072	80.3865	15.7402	16.2648	15.7402	16.2648	16.2648	15.7402	16.2648	15.7402	16.2648	16.2648	14.6908	28.0382	97.853	100.943	97.6867	100.943	100.943	97.6867	100.943	97.6867	100.943	100.943	91.1742	100.943	50.8514	72.792	51.6619	52.5464	52.5464	50.8514	52.5464	50.8514
998	0.85	0.5	202.078	163.794	139.984	525.663	711.137	356.296	104.62	104.62	101.245	104.62	101.245	117.033	123.139	100.435	148.958	102.028	104.62	101.245	75.0311	75.0311	61.7192	42.3563	44.2926	37.9997	33.643	37.2735	53.2479	29.0443	14.0381	26.866	8.79875	9.06183	8.76952	9.06183	8.76952	9.06183	9.06183	8.18488	9.06183	152.86	144.606	58.5031	106.636	106.636	103.196	106.636	103.196
1716	0.85	0.5	80.0346	58.3478	80.0346	77.4528	80.0346	33.0792	34.1818	34.1818	33.0792	34.1818	33.0792	34.1818	34.1818	30.8739	34.1818	33.0792	34.1818	64.5203	66.671	66.671	64.5203	66.671	64.5203	66.671	66.671	60.219	66.671	64.5203	66.671	102.683	106.106	106.106	102.683	106.106	102.683	106.106	106.106	95.8377	106.106	192.815	329.522	144.848	118.776	118.776	114.944	118.776	114.944
1896	0.85	0.5	548.275	458.584	1016.19	526.326	402.885	300.979	268.302	242.942	235.496	271.697	238.53	231.093	210.106	593.446	356.071	298.169	221.73	212.266	188.484	191.343	162.452	159.966	144.87	181.848	469.701	637.453	377.409	460.854	283.385	250.4	235.189	225.67	178.517	208.315	179.163	511.38	416.117	445.783	538.917	428.763	317.274	257.743	232.789	218.225	252.438	194.732	276.503
1883	0.85	0.5	105.002	94.8408	211.173	124.165	105.002	101.615	105.002	105.002	101.615	105.002	101.615	105.002	105.002	91.7923	105.002	101.615	30.6768	29.6873	30.6768	30.6768	29.6873	30.6768	29.6873	30.6768	30.6768	27.7081	95.0528	123.769	107.297	103.836	107.297	107.297	103.836	107.297	103.836	107.297	107.297	96.9132	107.297	174.895	106.724	103.281	106.724	106.724	103.281	106.724	103.281
1285	0.85	0.5	11.0195	9.95308	11.0195	10.664	11.0195	10.664	10.3983	10.3983	10.0629	10.3983	10.0629	10.3983	10.3983	9.39201	10.3983	10.0629	10.3983	10.0629	12.9812	12.9812	12.5625	12.9812	12.5625	12.9812	12.9812	11.725	12.9812	12.5625	12.9812	12.5625	11.1979	11.1979	10.8366	11.1979	10.8366	11.1979	11.1979	10.1142	11.1979	10.8366	11.1979	10.8366	11.6616	11.6616	11.2854	11.6616	11.2854
1266	0.85	0.5	12.7706	11.5348	12.7706	12.3587	12.7706	11.8098	12.2035	12.2035	11.8098	12.2035	11.8098	12.2035	12.2035	11.0225	12.2035	11.8098	12.2035	9.36822	9.6805	9.6805	9.36822	9.6805	9.36822	9.6805	9.6805	8.74367	9.6805	9.36822	9.6805	8.6949	8.98473	8.98473	8.6949	8.98473	8.6949	8.98473	8.98473	8.11524	8.98473	8.6949	8.98473	14.1339	14.605	14.605	14.1339	14.605	14.1339
1176	0.85	0.5	32.2176	29.0998	32.2176	31.1783	32.2176	31.1783	31.8945	31.8945	86.2395	63.1394	179.632	128.66	31.8945	28.8079	31.8945	30.8656	31.8945	30.8656	40.6555	40.6555	39.344	40.6555	39.344	40.6555	40.6555	36.7211	40.6555	39.344	40.6555	39.344	52.497	49.0866	40.673	41.9605	40.607	41.9605	41.9605	37.8998	41.9605	40.607	41.9605	40.607	34.8584	34.8584	33.734	34.8584	33.734
924	0.85	0.5	24.4082	22.0461	24.4082	23.6208	24.4082	23.558	24.3433	24.3433	23.558	24.3433	23.558	24.3433	24.3433	21.9875	24.3433	23.558	24.3433	25.385	26.2312	26.2312	25.385	26.2312	25.385	26.2312	26.2312	23.6927	26.2312	25.385	70.3146	55.1877	79.0357	40.3302	39.0292	40.3302	39.0292	55.997	42.0859	68.1195	60.1499	104.347	40.3302	38.0772	39.3465	39.3465	38.0772	39.3465	38.0772
758	0.85	0.5	65.6532	59.2997	65.6532	63.5354	65.6532	60.6423	62.6637	62.6637	60.6423	62.6637	60.6423	62.6637	62.6637	56.5994	62.6637	60.6423	62.6637	52.8778	54.6403	54.6403	52.8778	54.6403	52.8778	54.6403	54.6403	49.3526	54.6403	52.8778	54.6403	42.6005	44.0205	44.0205	42.6005	44.0205	42.6005	44.0205	44.0205	39.7605	44.0205	42.6005	44.0205	72.5013	74.9181	74.9181	72.5013	74.9181	72.5013
1257	0.85	0.5	0	0	0	0	0	0	0	0	0	0	0	0	0	0	0	0	0	0	0	0	0	0	0	0	0	0	0	0	0	0	0	0	0	0	0	0	0	0	0	0	0	0	0	0	0	0	0
895	0.85	0.5	2937.15	2669.12	3019.45	3132.58	3059.32	2892.83	2885.97	2411.94	2216.36	2296.7	2227.21	2300.78	2297	2072.51	2290.41	2218.07	2281.05	2187.52	2253.51	2040.17	1924.87	1993.52	1932.12	2001.13	2001.76	1936.53	2099.03	2192.41	2275.15	2342.61	2233.83	2366.25	2332.06	2460.98	2430.05	2477.05	2526.24	2288.54	2735.64	3245.7	3451.14	2892.64	2823.22	2792.71	2643.41	2690.56	2578.61
1317	0.85	0.5	31.558	28.504	31.558	30.54	31.558	30.54	31.558	31.558	30.54	31.558	30.54	31.558	31.558	28.504	31.558	30.54	31.558	30.54	31.558	31.558	30.54	31.558	23.7672	24.5594	24.5594	22.1827	24.5594	23.7672	24.5594	23.7672	24.5594	24.5594	23.7672	24.5594	8.51227	8.79602	8.79602	7.94479	8.79602	8.51227	8.79602	8.51227	8.79602	8.79602	8.51227	8.79602	5.54951
1242	0.85	0.5	21.5343	19.4503	21.5343	20.8396	21.5343	20.8396	21.5343	21.5343	82.9231	199.534	46.2621	49.8173	48.2243	37.6049	33.845	27.9754	22.2111	21.4946	22.2111	22.2111	21.4946	22.2111	21.4946	22.2111	22.2111	14.859	16.451	15.9203	16.451	15.9203	16.451	16.451	15.9203	16.451	15.9203	16.451	16.451	9.5959	10.624	10.2813	10.624	10.2813	10.624	10.624	10.2813	10.624	10.2813
107	0.85	0.5	54.1666	48.9246	54.1666	52.4193	52.3477	50.6591	52.3477	52.3477	50.6591	52.3477	50.6591	52.3477	52.3477	47.2818	52.3477	50.6591	27.5063	26.619	27.5063	27.5063	26.619	27.5063	26.619	27.5063	94.4434	237.037	136.606	87.3384	75.3717	72.9404	75.3717	75.3717	72.9404	75.3717	72.9404	75.3717	75.3717	100.976	216.283	79.6901	73.447	71.0777	73.447	73.447	71.0777	73.447	71.0777
1841	0.85	0.5	81.0088	73.1692	228.429	135.86	81.0088	78.3956	81.0088	81.0088	78.3956	81.0088	78.3956	81.0088	81.0088	73.1692	81.0088	78.3956	24.0701	23.2937	24.0701	24.0701	23.2937	24.0701	23.2937	24.0701	24.0701	113.294	97.4444	69.901	81.1475	78.5299	81.1475	81.1475	78.5299	81.1475	78.5299	81.1475	81.1475	73.2945	81.1475	78.5299	64.6826	62.5961	64.6826	64.6826	62.5961	64.6826	62.5961
907	0.85	0.5	241.184	198.066	261.326	218.483	155.475	129.912	98.4337	85.7816	103.231	100.619	90.7832	88.1991	81.6024	89.5805	99.3451	115.076	95.1333	82.0532	67.0284	69.7591	67.7132	67.6936	73.4786	68.875	65.0455	128.848	428.999	305.491	336.698	304.104	249.317	182.224	150.708	143.328	205.38	352.458	259.063	390.146	643.72	867.408	538.619	300.927	279.924	193.416	160.779	222.027	402.575
80	0.85	0.5	351.926	259.913	280.195	206.736	119.909	106.551	57.2418	54.2	56.6726	59.7873	169.51	418.612	109.995	310.415	199.203	199.602	138.151	162.94	56.1858	46.1646	57.6533	112.876	158.713	518.166	290.3	458.628	326.689	340.852	144.568	116.099	79.7176	72.2169	88.2928	153.299	202.201	407.777	420.514	455.481	436.342	186.055	171.357	134.817	127.732	75.4164	67.9228	71.7269	282.204
1236	0.85	0.5	2.16245	1.95318	2.16245	2.09269	2.16245	2.09269	1.21771	1.0763	0.824899	0.793475	0.930958	1.147	1.21771	1.09987	1.21771	1.17843	1.21771	1.17843	1.62048	1.62048	1.56821	1.62048	1.56821	1.62048	1.62048	1.46366	1.62048	1.56821	1.62048	1.56821	3.45773	3.45773	3.34619	3.45773	3.34619	3.45773	3.45773	3.12311	3.45773	3.34619	3.45773	3.34619	3.77172	3.77172	3.65005	3.77172	3.65005
981	0.85	0.5	124.501	136.689	296.351	478.42	171.318	121.402	114.604	113.021	105.919	108.621	103.689	106.834	105.81	95.0607	105.156	101.099	111.26	100.797	88.1145	88.1145	85.2721	88.1145	85.2721	88.1145	47.1839	33.5404	31.8349	21.318	21.6023	23.8762	7.46466	7.68786	7.43986	7.68786	7.43986	7.68786	7.68786	6.94387	7.68786	7.43986	7.68786	7.43986	84.9513	84.9513	82.2109	84.9513	82.2109
1093	0.85	0.5	25.8194	23.3208	25.8194	24.9865	25.8194	18.5123	19.1294	19.1294	18.5123	19.1294	18.5123	19.1294	19.1294	17.2782	19.1294	18.5123	19.1294	32.648	33.7362	33.7362	32.648	33.7362	32.648	33.7362	33.7362	30.4715	33.7362	32.648	61.7815	91.1589	73.2676	73.2676	70.9041	73.2676	70.9041	73.2676	73.2676	66.1772	73.2676	70.9041	73.2676	58.6791	60.6351	60.6351	58.6791	60.6351	58.6791
1709	0.85	0.5	68.2602	61.6544	68.2602	66.0583	68.2602	56.355	58.2335	58.2335	56.355	58.2335	56.355	58.2335	58.2335	52.598	58.2335	56.355	58.2335	33.8586	34.9872	34.9872	33.8586	34.9872	33.8586	34.9872	34.9872	49.4754	183.193	57.4711	45.4411	84.433	77.7615	77.7615	75.2531	77.7615	75.2531	77.7615	77.7615	70.2362	77.7615	75.2531	77.7615	48.7831	50.4092	50.4092	48.7831	50.4092	48.7831
1017	0.85	0.5	26.7623	21.8415	26.7623	25.899	26.7623	22.2524	22.9941	22.9941	22.2524	22.9941	22.2524	22.9941	8.30756	18.0986	20.3239	10.9037	16.986	11.2338	11.6083	11.6083	11.2338	11.6083	11.2338	11.6083	11.6083	10.4849	16.788	51.6574	21.398	64.0504	66.1854	66.1854	64.0504	66.1854	64.0504	343.616	66.1854	59.7804	66.1854	134.698	109.206	63.0216	65.1223	65.1223	63.0216	65.1223	63.0216
1194	0.85	0.5	9.71892	8.77838	9.71892	9.40541	9.71892	9.40541	9.38552	9.38552	9.08276	9.38552	9.08276	9.38552	9.38552	8.47725	9.38552	9.08276	9.38552	9.08276	8.79629	8.79629	8.51254	8.79629	8.51254	8.79629	8.79629	7.94504	8.79629	8.51254	8.79629	30.7039	25.6507	22.6414	21.911	22.6414	21.911	22.6414	22.6414	20.4503	22.6414	21.911	22.6414	21.911	16.9165	16.9165	16.3708	16.9165	16.3708
[truncated: 433 more columns]

## Sheet: Storage(WG inflow-No Demand)
grand_id	a1	a3	1980-01	1980-02	1980-03	1980-04	1980-05	1980-06	1980-07	1980-08	1980-09	1980-10	1980-11	1980-12	1981-01	1981-02	1981-03	1981-04	1981-05	1981-06	1981-07	1981-08	1981-09	1981-10	1981-11	1981-12	1982-01	1982-02	1982-03	1982-04	1982-05	1982-06	1982-07	1982-08	1982-09	1982-10	1982-11	1982-12	1983-01	1983-02	1983-03	1983-04	1983-05	1983-06	1983-07	1983-08	1983-09	1983-10	1983-11
610	0.85	0.5	36700	36700	36700	36700	36700	36700	36700	36700	36700	36700	36700	36700	36700	36700	36700	36700	36681.1	36614	36433.6	35898.4	35346.3	34819.1	34311.5	33814.6	33328	33150.4	33397	33507.7	33048.8	32451.2	31814.1	31231	30790.5	30380.3	30007.2	29857.6	30001.6	30370.1	31215.4	32292.5	32477.8	32135.6	31756.4	31786.1	31956.5	32133	32326
753	0.85	0.5	25305.7	25408.3	25551.4	26038.3	27141.4	27886.3	27959.5	27282.4	26587.6	26073	25689.6	25318.9	25084.2	24842	24619.6	24510.4	24634.3	26100	26420	25891.5	25225.1	24713.7	24370	24009.3	23760.5	23560.1	23529.5	24838.4	27471.2	29507.3	30211.5	29921.8	29444.1	29259.3	29376.9	29514.8	29896.1	30220	30220	30220	30220	30220	30096.2	29428.8	28679.7	28177	27930
870	0.85	0.5	26604.2	26825.3	27019.7	27249.7	27344.1	27395.1	27235	26955.4	26701.7	26534.7	26504.6	26495.4	26477.3	26453.1	26458.4	26409.9	26257.5	26088.6	25771.8	25301.5	24762.3	24334	23957.2	23636.6	23302.2	22953.3	22667.6	24019.5	26311.8	27693.6	28256.4	28446	28491.2	28642.8	28921	29098.4	29110	29110	29110	29110	29110	29106.2	29024.3	28959.1	28951.7	29020	29097.3
597	0.85	0.5	21103.6	21765.2	23836.9	25011.1	25070	25070	24867.8	23915.5	22952.1	22288.6	21863.3	21447.4	20935.9	20270.3	19450	18782	19061.9	19221.5	18466.8	17347.8	16195.4	15186.6	14530.6	14054.3	13545.4	13042.5	13067.7	13747	15146.1	17069.8	17305.4	16586.1	15921.3	15580.8	15514	15602.6	15685.5	15928.6	16995.8	19055.9	21257.8	24701.3	25022.7	24490.8	23757.9	23205.6	22858.5
307	0.85	0.5	13857.9	13709.5	13636	13767	13989.9	14135.1	14134.2	13695.2	13400.2	13291.1	13287.7	13295.7	13314.3	13323.6	13450.9	13890.4	14788.9	17053.6	17244.6	16855	16476.7	16314.4	16323.3	16356.5	16383	16416.8	16930.1	18359.5	19941.3	22285	23516	23345.7	23084.4	22971.8	23003.4	23057.5	23167	23253.9	23353.3	23499.1	23556.4	23484.3	23105.5	22488.6	21859.9	21521.1	21326.4
1753	0.85	0.5	5492.6	5736.7	6211.06	7001.45	7035.31	6924.41	6700.11	6403.92	6125.46	5897.75	5677.21	5502.68	5287.03	5285.47	5409.3	5394.22	5329.38	5286.17	5126.85	4909.95	4704.04	4476.86	4270.37	4113.38	4310.53	4967.55	5395.23	5570.94	5552.83	5398.47	5218.51	5013.53	4912.4	4728.95	4536.54	4771.31	5274.18	5626.05	5879.86	6239.11	6679.08	6908.23	6719.35	6432.52	6136.58	5889.22	5731.6
297	0.85	0.5	5550.17	4801.03	4150.27	3879.93	5533.67	7187.77	7314.27	7124.99	7067.7	6810.7	6510.23	6034.1	5761.35	5411.52	5095.44	4784.35	5596.05	7212.33	7434.2	7289.78	6882.05	6557.39	6044.95	5469.07	4752.53	4059.82	3515.22	2941.98	3253.04	4556.15	5357.31	5182.52	5298.24	5511.23	5355.64	5019.95	4683.94	4328.12	4129.39	4006.67	4614.16	5662.39	6555.68	6661.07	6406.39	5937.32	5718.95
1036	0.85	0.5	2452.1	2634.85	2847.59	3096.24	3207.78	3205.61	3079.74	2934.01	2789.49	2655.74	2529.31	2441.5	2324.95	2264.04	2203.43	2104.78	2028.19	2045.84	2072.75	2068.51	2053.47	2039.09	2137.12	2179.9	2276.07	2825.11	3090.64	3122.72	3123.89	3192.06	3346.85	3477.59	3620.87	3738.29	3877.68	4942.75	5438.92	5698.31	5893.78	6172.37	6638.79	6564.5	6327.9	6056.04	5780.48	5518.07	5465.04
989	0.85	0.5	1231.25	885.981	1170.52	1715.79	1533.18	1124.18	965.122	1078.95	1168.99	1216.83	1273.92	1393.59	1523.19	1653.08	1919.55	2090.89	2363.19	3600.71	5024.97	4949.75	4659.89	4264.8	4343.36	4341.43	4261.92	4889.09	5166.8	5137.32	4967.02	5484.9	5573.64	5273.74	4988.39	4504.92	3961.8	4148.21	4096.98	3926.2	3817.32	5429.71	6326.42	6340.04	5987.42	5414.08	4754.51	4176.92	4362.77
1135	0.85	0.5	2180.54	2121.75	2083.25	1994.11	1932.69	2048.78	1967.5	1815.93	1669.24	1915.16	1934.14	2145.14	2208.05	2153.72	2305.57	2377.11	2410.6	2576.48	2570.22	2453.27	2324.45	3031.98	4141.3	4363.05	4407.29	4711.69	4946.03	5063.9	5490.94	6406.9	6400.3	6289.4	6022.92	5676.12	5286.62	4904.73	4558.06	4502.62	4607.14	4546	4398.68	4270.45	4070.81	3843.97	3569.78	3590.56	4720.47
1269	0.85	0.5	2933.85	3435.72	3645.58	4096.95	4611.84	4792.03	4577.19	4272.79	3915.02	3582.32	3281.72	2974.5	2645.42	2362.71	2104.38	1808.78	1520.93	1637.62	1881.69	1891.11	1924.66	1916.34	1939.44	1973.8	2021.92	2201.33	2383.77	2604.79	3090.53	3152.85	3037.97	2883.62	2681.36	2514.93	2388.8	3077.1	4305.2	5046.54	6010.78	6287.7	6287.46	6227.55	5977.28	5612.03	5183.38	4719.57	4264.32
1077	0.85	0.5	1265.45	1250.77	1285.47	1265.19	1429.17	1892.03	1892.21	1799.85	1679.02	1564.33	1427	1315.76	1177.7	1041.05	983.534	916.29	819.366	785.445	785.304	812.754	835.042	965.556	1665.04	2062.04	2250.67	3243.86	3770.64	4052.34	4442.24	4718.6	4671.44	4465	4148.54	3775.49	3367.65	3083.84	2853.29	2882.4	3121.76	3191.54	3277.95	3447.7	3359.79	3166.83	2912.35	2894.11	3498.9
1026	0.85	0.5	1344.57	1471.53	1664.01	1868.34	1864.03	1825.8	1781.08	1664.67	1540.48	1413.35	1308.29	1347.45	1294.84	1330.44	1390.19	1361.83	1395.22	1615.5	1718.98	1741.65	1759.97	1742.87	2035.61	2096.92	2190.88	3032.88	3419.1	3433.58	3386.4	3260.2	3033.28	2772.41	2583.09	2305.9	2052.9	3249.08	3438.2	3463.88	3322.37	3330.74	3751.38	3655.25	3408.74	3119.3	2816.45	2573.08	2565.81
740	0.85	0.5	3060.27	3088.31	3093.19	3048.75	2937.75	2825.08	2732.02	2697.51	2760.96	2778.91	2813.44	2841.66	2850.13	2850.83	2830.44	2797.7	2736.38	2752.16	2742.01	2689.54	2689.74	2762.16	2780.85	2816.93	2865.72	2897.76	2892.65	2871.24	2827.41	2787.67	2755.04	2722.7	2693.29	2800.75	2842.37	2864.18	2876.89	2877.61	2891.56	2862.74	2786.84	2740.23	2700.31	2637.9	2695.66	2764.48	2794.69
1294	0.85	0.5	966.558	948.369	928.048	910.167	908.124	914.34	893.046	857.278	833.731	847.304	854.271	922.628	965.316	1019.95	1150.46	1342.15	1482.86	1821.27	2105.71	2185.68	2250.35	2316.19	2422.2	2488.91	2540.83	2594.48	2642.49	2654.72	2644.2	2630.3	2583.15	2515.38	2444.49	2371.89	2298.55	2233.56	2186.84	2192.91	2255.92	2307.39	2270.2	2239.65	2196.65	2148.91	2093.13	2033.72	1971.45
1848	0.85	0.5	2407.62	2453.91	2725.14	3123.73	3101.82	2973.18	2828.22	2674.71	2517.01	2374.79	2322.36	2391.19	2294.61	2346.9	2321.23	2338.1	2245.45	2200.45	2126.33	2024.27	1924.56	1820.86	1723.23	1645.63	1793.83	1988.55	2075.95	2245.18	2265.09	2182.72	2083.48	1985.5	1882.77	1785.35	1711.87	2279.57	2799.75	2998.65	3104.54	3310.37	3535.89	3631.64	3492.94	3330.02	3164.67	3007.24	2907.21
1869	0.85	0.5	1604.18	1904.76	2445.41	3318.45	3276.68	3100.06	2882.68	2627.89	2358.07	2104.45	1851.06	1618.86	1387.99	1251.86	1220.51	1115.91	1014.95	980.334	923.893	846.619	770.444	693.159	617.38	543.311	546.146	822.6	1021.66	1389.95	1776.52	1711.04	1602.85	1478.69	1350.62	1223.37	1095.22	2086.46	3288.15	3357.51	3357.56	3357.66	3334.61	3252.31	3081.36	2852.6	2598.31	2343.8	2096.53
1863	0.85	0.5	2599.33	2768.85	3001.95	3137.09	3097.08	3057.28	2978.51	2870.41	2756.9	2668.34	2597.09	2525.66	2435.26	2500.32	2523.4	2465.67	2377.5	2306.91	2213.03	2117.09	2023.4	1924.83	1834.4	1757.35	1992.93	2307.27	2453.06	2451.83	2479.23	2410.93	2331.39	2250.59	2158.92	2079.54	2016.12	2148.68	2304.86	2473.99	2580.21	2765.79	2761.82	2707.71	2623.47	2524.29	2433.23	2337.78	2282.92
1770	0.85	0.5	1880.54	2023.16	2236.9	2448.29	2431.59	2371.67	2292.12	2200.72	2107.06	2011.11	1915.13	1828.44	1752.06	1807.41	1898.4	1897.39	1881.83	1876.49	1843.78	1783.42	1721.08	1652.97	1592.44	1605.3	1808.18	2109.45	2321.95	2399.2	2362.02	2295.62	2213.58	2128.17	2044.41	1950.16	1861.54	1983.74	2116.8	2202.28	2246.25	2258.67	2300.11	2344.3	2283.71	2205.76	2124.9	2042.55	1963.69
965	0.85	0.5	1892.95	1911.7	1984.83	2337.02	2427.54	2431.23	2368.75	2275.42	2186.88	2096.96	2013.75	1930.93	1848.16	1766.04	1697.17	1631.24	1573.29	1527.48	1447.76	1408.15	1376.74	1333.94	1292.62	1293.21	1263.15	1294.71	1497.88	1662.74	1845.73	2163.15	2257.88	2256.83	2227.34	2185.55	2133.34	2078.29	2037.87	2043.3	2116.27	2610.73	2761.08	2784	2770.78	2702.36	2612.86	2522.21	2446.52
1247	0.85	0.5	2150.86	2100.65	2050.06	1984.06	1930.18	1888.81	1802.21	1699.16	1605.76	1919.23	1922.64	2114.28	2175.22	2159.02	2197.93	2216.59	2211.89	2181.72	2136.82	2081.78	2025.94	2318.08	2590.8	2590.8	2590.28	2590.78	2590.8	2586.86	2585.34	2590.8	2590.57	2576.89	2536.53	2481.1	2417.26	2351.84	2295.27	2278.5	2255.55	2243.32	2189.65	2136.88	2079.3	2011.04	1937.89	1862.86	1788.5
7313	0.85	0.5	821.672	647.689	612.325	736.926	1102.97	1811.55	1957.44	1612.01	1299.99	1184.59	1108.16	1037.69	973.611	881.144	1011.91	1194.31	1679.18	2505.24	2381.14	1895.48	1387.06	1011.83	787.075	625.433	507.576	384.441	888.701	1837.62	2525.75	2529.9	2456.43	2103.98	1719.91	1557.66	1447.06	1359.23	1365.27	1366.33	1729.26	2271.66	2527.51	2529.71	2435.6	2098.97	1730.66	1494.96	1404.66
1287	0.85	0.5	1038.39	1180.7	1245.4	1270.67	1287.51	1293.45	1243.93	1173.94	1089.38	1066.49	1035.85	991.193	948.006	886.636	838.596	802.663	769.374	1051.41	1291.68	1290.32	1270.4	1343.15	1751.04	1881.41	1907.19	1983.5	2048.54	2081.74	2233.47	2515.92	2469.1	2325.76	2149.53	1971	1793.48	1830.35	1853.69	1849.48	2061.44	2111.34	2053.08	2032.81	1927.68	1818.67	1695.25	1547.52	1398.21
1186	0.85	0.5	1504.22	1703.93	1731.79	1791.35	1845.37	1833.98	1786.53	1722.15	1651.75	1588.61	1527.81	1469.26	1406.12	1346	1288.94	1230.62	1196.37	1295.78	1304.99	1281.47	1256.11	1230.27	1216.16	1200.06	1179.62	1206.49	1224.22	1215.32	1201.6	1178.88	1144.85	1099.75	1048.97	1002.94	963.539	1176.2	1277.15	1398.71	1555.51	1615.92	1600.16	1573.43	1530.25	1470.81	1405.55	1341.25	1281.15
1042	0.85	0.5	861.747	888.269	920.221	953.508	950.892	937.756	914.969	888.606	860.897	836.85	816.328	797.279	775.24	769.26	765.206	758.478	755.952	773.985	768.025	753.217	735.865	721.52	719.066	711.314	729.619	911.19	999.648	999.272	987.289	984.921	969.362	943.996	919.683	895.462	880.331	1205.2	1342.72	1360.1	1362.76	1405.5	1476.55	1472.8	1448.33	1410.68	1372.42	1351.93	1450.66
884	0.85	0.5	2300.45	2320.74	2338.42	2343.6	2343.51	2343.35	2339.27	2328.69	2309.01	2298.36	2296.29	2292.18	2285.65	2278.26	2267.94	2260.02	2244.54	2228.81	2210.11	2191.98	2166.74	2152.34	2142.07	2136.65	2129.42	2120.24	2111.37	2106.06	2091.35	2083.53	2058.15	2041.76	2044.31	2058.76	2070.85	2081.46	2092.2	2100.19	2112.51	2125.57	2134.31	2133.97	2130.36	2117.87	2118.14	2128.63	2144.76
1273	0.85	0.5	776.517	779.234	777.205	770.687	774.33	786.512	760.009	726.36	698.04	679.984	660.608	686.661	698.187	702.166	725.697	753.151	757.586	778.691	792.483	777.674	761.26	789.316	826.582	835.417	840.812	866.764	901.877	942.042	1036.33	1131.27	1159.46	1160.69	1151.27	1137.57	1121.47	1105.6	1097.12	1109.05	1125.99	1146.59	1147.94	1138.65	1118.14	1090.71	1061.27	1033.05	1005.55
961	0.85	0.5	0	0	0	0	0	0	0	0	0	0	0	0	0	0	0	0	0	0	0	0	0	0	0	0	0	0	0	0	0	0	0	0	0	0	0	0	26.4568	69.8696	117.643	264.316	353.472	402.624	424.565	435.08	442.524	450.646	513.372
1144	0.85	0.5	1148.18	1185.78	1203.8	1212.06	1218.22	1215.85	1183.53	1136.2	1089.94	1104.69	1108.14	1121.71	1121.15	1115.44	1115.92	1106.48	1097.19	1137.79	1147.87	1130.09	1107.26	1112.81	1202.08	1227.8	1227.54	1297.9	1342.16	1349.74	1366.02	1491.63	1532.91	1517.26	1485.61	1458.59	1436.59	1543.25	1632.03	1651.92	1702.77	1712.91	1723.37	1728.93	1713.01	1666.79	1614.57	1566.74	1524.09
616	0.85	0.5	2061.3	2114.32	2242.9	2240.24	2225.31	2242.9	2227.43	2171.76	2137.24	2113.3	2093.62	2076.27	2058.82	2041.84	2021.69	1981.43	1914.73	1828.76	1739.24	1686.65	1673.2	1670.33	1671.07	1674.56	1678.64	1682.47	1682.64	1666.65	1620.9	1555.89	1490.89	1450.65	1433.98	1421.45	1413.7	1409.39	1403.93	1399.51	1391.97	1368.09	1317.36	1244.84	1173.48	1140.54	1143.41	1154.81	1166.67
911	0.85	0.5	747.754	808.766	876.029	992.089	1029.06	1045.1	1027.09	977.594	928.22	869.514	806.758	740.504	671.642	605.296	554.382	488.732	417.989	339.02	312.823	326.02	331.281	331.738	336.304	356.407	371.962	422.549	761.911	1112.77	1418.15	1781.04	1888.93	1859.56	1792.99	1713.15	1677.22	1788.32	1857.26	1954.18	2170.49	2171.4	2171.4	2171.4	2171.24	2148.47	2075.49	1979.86	1954.65
1006	0.85	0.5	681.993	709.46	751.952	793.673	792.135	780.422	757.357	729.884	704.425	681.352	665.304	654.616	636.714	636.639	643.824	634.884	649.221	723.688	775.037	778.686	772.413	773.398	859.351	880.677	913.153	1042.25	1085.89	1093.38	1091.18	1110.78	1090.95	1076.11	1103.11	1076.66	1057.21	1218.18	1229.96	1234.22	1222.65	1302.33	1420.75	1415.16	1384.98	1341.21	1296.59	1315	1442.73
1048	0.85	0.5	1332.68	1284.4	1325.06	1522.74	1690.11	1848.87	1864.76	1800.38	1718.27	1626.46	1529.8	1430.56	1323.73	1219.53	1116.98	1007.5	887.047	770.207	698.16	670.998	639.056	608.991	628.971	667.41	672.772	777.662	892.448	941.522	1027.71	1341.96	1467.51	1456.39	1416.39	1361.03	1296.49	1234.37	1171.45	1137.87	1134.53	1304.96	1374.65	1480.61	1524.16	1509.43	1475.03	1457.46	1480.66
1123	0.85	0.5	1147.35	1184.2	1194.05	1185.26	1179.23	1164.4	1131.21	1091.56	1056.28	1112.26	1108.91	1124.65	1110.34	1114.24	1119.45	1108.61	1104.76	1163.38	1167.32	1145.67	1118.98	1092.16	1074.76	1060.13	1049.56	1143.91	1180.34	1177.78	1228.77	1329.93	1323.73	1298.2	1263.79	1228.15	1194.46	1324.21	1381.68	1383.98	1411.62	1420.66	1501.54	1530.14	1504.25	1459.82	1410.94	1363.71	1318.85
1032	0.85	0.5	187.234	213.896	210.634	334.248	272.01	188.743	223.288	280.702	326.826	361.101	387.42	409.565	423.48	436.667	467.891	504.74	551.693	668.512	691.681	625.201	544.767	462.788	536.855	593.673	583.808	755.431	844.342	871.484	965.857	1532.97	1620.16	1482.11	1310.9	1113.69	900.249	718.756	641.791	694.89	736.19	1040.59	1185.49	1248.43	1201.31	1125.52	1022.9	969.74	1013.1
1774	0.85	0.5	500.367	749.78	1244.7	1682.27	1723.54	1644.14	1510.22	1338.59	1149.53	946.957	732.7	513.736	286.29	219.947	286.06	362.562	344.868	497.405	636.967	706.305	748.058	771.814	788.698	811.804	1046.53	1825.67	1900.8	1900.8	1900.8	1819.14	1627.02	1406.22	1228.04	1010.82	828.349	885.625	1039.14	1344.27	1582.36	1827.88	1900.26	1859.34	1711.19	1513.85	1290.89	1050.13	802.063
1781	0.85	0.5	548.793	675.828	998.627	1473.77	1543.98	1492.69	1371.42	1216.9	1051.87	880.792	705.073	540.638	383.6	397.327	562.12	694.119	689.333	732.748	714.02	661.709	599.793	529.98	458.576	393.225	506.603	1107.64	1600.51	1825.23	1834.79	1704.93	1529.62	1354.22	1161.39	948.958	760.011	772.588	893.905	1178.35	1530.51	1870.88	1895.17	1838.94	1687.19	1497.59	1292.88	1079.3	870.374
355	0.85	0.5	460.035	394.771	351.812	462.328	980.949	1276.54	1117.67	860.749	660.593	490.126	428.936	456.266	455.995	427.316	449.454	672.148	1244.98	1753.28	1590.2	1272.29	978.716	727.1	497.094	371.516	268.314	177.609	174.312	264.91	534.124	785.135	715.052	534.952	388.113	285.221	310.231	435.114	596.53	745.177	987.152	1360.7	1760.6	1760.6	1657.98	1398.54	1190.62	1088.01	1050.16
1101	0.85	0.5	862.194	900.264	1081.85	1437.49	1458.37	1390.85	1291.67	1174.93	1051.66	931.843	833.73	841.802	792.351	802.128	798.859	814.201	756.308	725.059	714.58	675.848	628.739	576.335	525.178	475.574	465.316	595.032	718.076	838.376	898.822	881.42	828.98	764.776	696.862	628.026	562.777	962.423	1462.46	1669.77	1706.84	1706.9	1706.9	1670.82	1568.28	1434.99	1291.88	1148.36	1014.76
1023	0.85	0.5	1311.21	1402.57	1630.8	1637	1637	1637	1636.99	1627.8	1588.86	1526.49	1444.83	1354.66	1253.37	1151.25	1047.26	936.905	829.646	743.856	711.902	708.766	679.99	595.178	563.747	548.466	508.773	513.662	571.696	587.526	572.139	610.253	659.447	656.882	623.902	562.259	481.197	394.116	312.164	262.968	270.341	879.825	1380.01	1611.23	1622.53	1592.77	1528.83	1444.21	1354.88
1060	0.85	0.5	413.594	433.496	474.5	531.557	525.019	513.128	490.975	462.48	435.028	411.641	387.708	407.12	402.694	412.765	446.113	452.865	477.045	524.4	523.973	519.394	510.625	500.791	581.888	598.932	614.991	789.664	827.301	820.284	804.266	814.942	807.419	763.245	717.429	671.582	635.654	932.566	980.59	1033.22	1022.35	1014.12	1116.08	1124.52	1081.91	1019.65	956.831	896.919	865.084
1864	0.85	0.5	531.554	609.705	882.231	1345.27	1370.61	1276.4	1148.33	997.406	840.135	699.317	573.003	513.801	434.793	382.78	355.248	305.515	277.399	292.64	289.612	271.624	250.025	225.244	200.795	180.203	227.479	400.292	547.346	724.909	886.907	848.521	780.071	711.608	672.357	638.385	630.007	1192.93	1496.8	1496.8	1496.8	1496.8	1487.18	1452.1	1345.75	1200.71	1042.96	886.139	749.659
1797	0.85	0.5	1173.41	1209.06	1264.89	1326.87	1326.5	1305.91	1273.93	1239.01	1207.23	1182.91	1162.78	1151.83	1136.4	1151.67	1170.66	1180.51	1166.53	1156.86	1124.55	1092.13	1063.99	1033.64	1013.41	1002.73	1027.16	1097.7	1147.42	1158.13	1143.42	1124.79	1101.27	1091.1	1077.86	1060.35	1051.83	1090.75	1129.07	1168.61	1200.13	1243.58	1266.81	1263.48	1234.82	1200.09	1168.9	1144.44	1130.24
305	0.85	0.5	1410.02	1419.43	1422.82	1416.94	1415.82	1420.66	1390.83	1330.94	1303.38	1286.22	1306.18	1359.63	1393.51	1405.77	1419.29	1420.99	1420.11	1422.85	1389.81	1316.51	1263	1260.79	1268.87	1316.72	1337.81	1376.29	1424.2	1423.1	1413.68	1395.39	1375.22	1311.07	1270.57	1269.86	1295.91	1352.95	1401.12	1421.19	1422.81	1415.34	1393.64	1356.48	1350.56	1312.77	1281.77	1263.29	1306.87
968	0.85	0.5	1282.07	1251.53	1250.41	1407.79	1412.3	1412.29	1402.17	1379.32	1358.97	1341.24	1326.92	1311.24	1293.34	1275.07	1256.48	1235.89	1247.18	1281.27	1257.13	1238.22	1221.33	1205.06	1192.58	1179.55	1164.54	1154.64	1155.35	1159.46	1174.94	1230.48	1247.34	1228.3	1201.34	1170.68	1137.86	1103.28	1067.31	1038.29	1023.89	1125.56	1143.62	1207.33	1251.19	1234.32	1220.11	1212.88	1213.27
1019	0.85	0.5	671.783	675.887	713.735	749.096	744.144	731.952	717.75	701.727	685.446	669.351	653.714	638.344	621.871	612.385	616.319	609.671	610.545	653.995	656.374	651.154	642.171	631.187	620.184	608.179	605.515	684.691	771.085	786.63	782.812	773.416	759.58	743.696	729.113	713.529	698.103	826.764	935.068	954.375	964.953	1027.22	1125.26	1120.55	1099.47	1074.76	1049.47	1025.3	1009.01
1302	0.85	0.5	599.47	594.471	587.42	579.257	569.503	557.818	539.985	525.158	523.406	536.991	543.993	569.744	583.568	602.066	637.342	670.005	692.565	842.326	932.781	920.153	906.673	893.892	884.824	871.603	853.587	836.675	819.52	797.698	776.585	753.844	728.509	708.728	690.295	674.298	659.761	648.266	640.853	645.619	663.447	680.574	667.142	654.335	640.794	628.577	615.953	605.301	594.849
1824	0.85	0.5	1206.58	1231.4	1272.2	1322.81	1319.69	1303.49	1278.99	1247.34	1218.23	1204.75	1198.33	1196.62	1190.88	1206.98	1216.93	1218.44	1205.91	1192.01	1175.75	1151.34	1129.32	1109.94	1101.87	1103.78	1133.57	1175.72	1197.43	1209.97	1203	1184.42	1156.71	1136.01	1116.06	1102.53	1094.86	1137.41	1177.44	1209.65	1224.01	1252.02	1275.42	1284.22	1255.33	1220.95	1191.85	1172.99	1170.46
1316	0.85	0.5	0	0	0	0	0	0	0	0	0	0	0	0	8.4067	21.5776	42.3583	72.369	136.708	204.171	275.018	274.323	274.438	274.116	285.832	285.399	280.103	273.104	267.605	257.063	246.62	235.015	223.811	212.26	201.843	193.25	185.932	177.817	170.019	164.225	158.819	153.056	147.163	142.258	137.159	131.548	127.525	124.748	123.986
1835	0.85	0.5	829.139	848.135	888.244	936.822	934.582	917.022	884.426	850.7	818.784	805.847	789.741	782.365	770.059	778.428	782.123	778.199	757.716	740.85	715.151	692.391	674.626	649.907	637.403	636.545	668.9	712.134	734.555	741.47	732.22	709.428	685.52	675.714	655.104	635.656	625.876	658.334	687.104	716.966	736.055	770.378	792.67	801.385	778.502	743.587	713.334	688.901	678.404
1847	0.85	0.5	1163.24	1189.04	1242.62	1292.38	1288.15	1267.69	1231.73	1193.64	1167.04	1174.15	1162.04	1156.26	1143.42	1157.26	1168.47	1175.49	1152.8	1138.93	1108.98	1083.81	1067.87	1042.59	1030.86	1032.51	1066.95	1121.28	1147.82	1157.46	1154.37	1131.33	1103.76	1077.02	1049.63	1034.29	1025.28	1062.01	1089.88	1117.53	1138.87	1163.37	1174.76	1176	1152.18	1118.35	1090.86	1071.46	1064.14
1231	0.85	0.5	491.148	586.125	620.839	635.355	643.825	638.412	617.169	589.072	558.383	528.212	498.003	469.409	439.313	410.731	382.934	354.735	334.695	530.419	623.297	641.132	647.36	655.306	702.489	749.627	778.514	814.647	851.191	876.156	897.364	898.285	872.435	834.504	790.361	744.582	702.357	879.481	929.351	965.997	1058.96	1079.62	1075.78	1064.25	1034.82	992.48	944.168	891.427	838.111
1140	0.85	0.5	1029.2	1025.8	1021.2	1015.79	1011.48	1007.71	1002.42	997.359	992.478	989.583	985.844	984.621	980.933	976.888	973.899	969.295	964.963	961.045	955.901	951.204	946.68	942.518	938.498	934.558	930.537	926.773	922.566	917.639	915.521	916.889	919.696	914.927	910.179	905.715	901.574	898.552	896.995	911.856	912.57	909.841	905.091	900.882	896.084	891.076	886.219	935.918	1037.13
1296	0.85	0.5	702.424	724.237	725.598	723.62	722.462	721.334	710.979	698.636	686.941	676.559	665.708	655.232	644.067	637.508	631.314	622.13	614.214	643.712	657.706	650.338	643.728	637.534	666.376	673.925	672.219	670.715	669.234	666.865	684.999	693.051	686.302	676.048	665.826	657.102	649.136	671.643	680.8	717.596	760.394	796.861	817.503	845.409	838.829	829.061	818.653	807.575	796.162
1659	0.85	0.5	589.034	589.231	640.861	675.027	677.674	672.635	659.991	646.146	631.433	614.403	596.771	580.708	565.454	581.027	590.908	595.265	628.621	651.988	649.223	644.998	682.795	681.722	676.731	671.092	677.848	754.542	930.066	993.353	1006.75	1004.74	988.693	965.775	940.589	914.459	893.541	937.073	953.658	962.951	973.179	1015.05	1046.92	1059.57	1049.99	1029.56	1005.28	988.397	1012
1277	0.85	0.5	833.85	829.033	822.789	816.451	818.389	818.97	808.877	797.826	788.389	781.519	774.328	776.338	774.918	775.768	781.377	789.49	789.205	808.082	821.943	815.628	810.332	804.652	798.882	792.509	785.53	780.007	775.001	769.976	769.231	766.456	759.609	751.434	743.604	736.201	729.424	724.119	721.026	724.812	731.887	737.82	736.482	733.093	727.093	719.886	712.417	705.798	699.567
1021	0.85	0.5	837.194	928.206	1021.39	1200.28	1221.07	1210.49	1178.26	1125.14	1062.85	997.163	928.195	858.546	783.653	709.901	635.802	555.294	476.165	430.219	402.389	371.971	344.262	320.032	397.705	439.296	452.601	582.278	680.554	725.34	796.271	940.179	990.07	987.868	962.383	928.111	888.5	846.501	798.705	773.543	863.324	1210.33	1221.4	1220.68	1207.6	1166.26	1115.71	1062.44	1011.71
1280	0.85	0.5	1178.93	1121.75	1060.82	995.323	930.373	864.638	772.556	678.214	794.967	1188.18	1210.03	1211.3	1211.3	1211.3	1211.3	1211.3	1203.33	1176.27	1121.46	1052.7	995.804	979.885	1013.82	979.059	938.896	905.593	868.51	831.249	805.122	779.76	757.294	711.259	667.599	628.856	593.834	561.41	529.705	513.809	500.702	493.571	480.076	464.433	437.648	405.521	374.517	350.885	332.919
1120	0.85	0.5	652.483	649.812	646.084	641.706	637.795	632.252	623.228	614.733	607.458	601.522	595.754	590.848	584.604	578.167	572.11	564.595	556.998	549.094	539.418	531.335	524.632	519.021	514.012	508.361	502.469	498.02	493.632	489.179	500.269	544.2	560.62	569.851	574.541	577.468	579.173	581.432	582.223	583.198	584.704	587.694	589.467	590.63	587.115	580.448	573.787	597.797	651.262
182	0.85	0.5	603.345	939.09	1093.16	1087.55	1051.6	946.678	816.645	694.427	584.383	474.999	365.34	258.676	148.5	140.969	185.046	253.071	243.123	224.553	181.436	152.087	137.724	126.184	183.638	532.935	1040.67	1102.7	1102.7	1102.7	1100.88	1067.43	999.992	885.698	786.371	693.44	684.403	999.044	1075.38	1099.16	1101.31	1094.1	1092.81	1071.82	981.225	868.41	773.078	678.161	777.216
7311	0.85	0.5	483.454	487.559	511.541	551.877	551.361	546.203	536.908	524.842	511.592	498.252	484.983	471.368	456.652	441.988	427.199	411.881	396.857	387.798	387.837	385.804	380.727	374.808	375.981	388.303	390.208	413.231	430.389	438.382	457.633	533.051	557.326	557.102	552.863	547.041	540.181	532.361	527.734	549.323	578.944	653.697	678.698	689.398	686.008	673.943	661.862	649.354	636.776
1755	0.85	0.5	346.421	381.363	478.341	567.348	564.887	548.318	520.758	485.122	446.037	404.828	363.816	330.911	301.185	384.682	424.243	433.257	439.198	556.603	569.796	550.597	528.528	502.467	479.589	514.463	655.055	804.585	885.159	918.42	918.759	874.959	815.725	751.772	761.855	700.143	633.271	635.8	675.237	722.084	695.416	727.271	894.262	998.681	972.854	932.67	885.393	836.893	826.602
1152	0.85	0.5	0	0	0	0	0	0	0	0	0	0	0	0	0	0	0	0	0	0	0	0	0	0	0	0	0	0	0	0	0	0	0	0	0	0	0	0	0	0	0	0	0	0	0	0	0	0	0
1192	0.85	0.5	456.808	532.219	571.088	599.65	632.528	659.676	656.044	627.098	589.654	556.985	526.641	499.649	470.035	445.491	424.681	402.554	377.96	424.087	488.024	501.846	504.391	505.036	515.732	527.635	542.048	591.855	649.747	683.266	703.97	680.634	617.042	542.984	464.975	392.062	325.001	340.118	489.864	574.8	668.191	696.144	689.245	674.586	642.284	590.956	531.191	471.04	414.556
541	0.85	0.5	218.671	110.916	89.6067	89.7894	678.015	922.349	873.492	775.059	670.156	561.893	452.895	338.676	215.582	106.028	89.3644	127.6	413.948	451.538	382.289	336.958	284.307	234.594	189.336	142.018	99.2513	91.1787	91.2059	99.3059	685.236	923.2	872.723	765.856	661.507	549.997	433.764	312.564	183.211	93.2114	88.8162	89.9672	368.033	922.817	878.005	778.99	667.906	550.349	433.343
1822	0.85	0.5	834.487	854.532	887.079	908.579	904.808	893.434	874.193	851.89	835.419	830.383	824.625	826.195	822.031	833.752	841.167	843.464	831.772	825.354	804.951	788.198	776.441	760.271	754.533	759.821	780.322	813.645	835.091	836.279	823.845	806.052	785.169	780.314	771.176	760.48	756.881	784.565	802.575	819.526	828.26	844.884	851.269	848.011	829.818	809.106	790.091	777.205	774.709
972	0.85	0.5	701.027	759.762	872.535	907.8	907.8	907.8	907.657	898.946	871.435	827.921	777.25	722.771	664.212	606.275	546.988	485.76	448.877	453.7	440.749	432.112	413.591	388.357	361.621	335.539	309.035	292.708	302.669	324.952	330.442	337.064	346.815	349.508	341.337	326.346	307.537	287.598	266.553	253.158	261.273	496.709	608.535	648.068	658.831	643.299	613.626	574.165	531.98
613	0.85	0.5	192.89	163.673	211.22	373.77	838.492	890.6	814.613	636.566	486.669	373.524	312.345	258.344	191.572	117.479	87.7988	154.662	246.84	213.065	116.551	88.3832	88.3648	88.4151	88.4655	88.4509	89.4728	100.644	195.83	358.785	681.807	889.429	783.714	594.816	438.267	305.433	189.775	103.236	85.9286	85.5962	169.233	277.454	503.789	811.109	753.996	584.714	427.211	298	205.791
1086	0.85	0.5	422.514	419.862	417.062	413.827	409.425	401.749	390.281	378.48	369.533	362.948	358.758	356.091	353.206	350.372	347.744	344.565	338.414	322.709	300.775	281.596	267.182	259.375	256.433	254.295	252.175	250.233	248.32	245.78	240.986	231.883	220.376	210.693	204.576	201.417	199.549	198.391	197.629	204.663	215.455	225.637	222.75	213.836	202.355	191.739	184.194	180.804	179.33
1295	0.85	0.5	323.059	376.833	395.252	408.132	412.224	410.7	394.095	373.582	353.026	336.536	319.649	308.872	299.491	306.678	302.18	290.094	287.321	327.559	353.958	351.282	350.936	347.349	410.507	436.345	448.287	463.505	482.337	509.783	586.938	608.876	590.702	566.127	536.267	511.605	515.155	637.517	706.908	785.499	855.073	867.871	861.982	850.364	818.13	783.535	748.792	709.852	669.563
1139	0.85	0.5	666.882	662.181	655.534	645.288	634.667	622.768	606.913	591.607	582.031	614.663	619.975	645.577	647.253	645.366	676.983	679.54	678.813	679.976	671.541	660.302	650.167	700.728	747.567	749.44	746.47	752.585	757.995	756.944	787.877	839.208	844.547	842.213	836.328	829.59	821.959	819.54	824.855	831.98	833.95	833.818	827.81	820.509	807.331	791.783	776.317	769.009	766.763
1862	0.85	0.5	444.202	504.031	651.626	820.251	798.268	769.558	715.768	651.864	585.818	526.265	474.626	427.345	371.046	405.831	427.218	415.793	378.998	372.338	347.86	318.621	288.094	254.371	221.797	191.703	289.41	482.147	601.619	623.683	644.997	606.276	558.876	510.794	458.672	408.367	367.093	448.083	527.263	601.804	652.287	745.361	751.75	724.839	673.961	614.313	555.817	495.455	452.584
629	0.85	0.5	108.409	132.348	167.403	150.448	107.725	84.8301	66.2417	62.9521	70.476	78.535	87.6382	97.0228	105.902	112.527	112.945	87.2836	39.828	24.7533	24.6685	73.4361	81.8243	90.5254	98.0421	106.856	115.26	122.709	122.841	99.7645	53.3808	28.86	28.7816	73.5412	81.8439	85.4706	91.0671	100.29	107.516	112.449	113.406	90.4449	48.46	37.5094	37.4652	43.9968	54.0985	64.1659	70.8093
1000	0.85	0.5	288.554	311.365	350.937	380.915	380.747	369.981	353.408	333.19	312.196	292.122	281.728	294.779	288.277	298.637	316.721	307.379	338.223	426.922	467.357	462.566	451.291	439.475	463.835	485.254	509.192	594.117	630.547	634.227	625.322	635.219	611.632	580.582	556.443	522.469	490.732	620.728	623.009	611.048	587.553	683.328	720.825	699.891	665.108	624.247	582.797	577.161	659.859
7306	0.85	0.5	707.797	715.067	730.378	749.846	749.514	743.965	733.063	721.03	709.224	705.976	702.138	700.707	697.03	701.3	703.487	702.491	695.502	690.143	682.08	671.627	664.127	655.363	650.782	650.346	661.13	676.135	684.153	687.216	682.854	672.781	661.348	655.488	647.654	640.672	636.897	651.536	663.788	674.883	681.817	696.13	704.406	707.236	696.972	683.318	672.738	664.218	660.83
991	0.85	0.5	245.353	279.113	374.352	518.079	535.277	524.979	494.436	454.13	408.881	360.034	309.816	261.911	210.573	158.569	113.237	79.3658	81.7206	86.2698	100.934	141.172	169.714	193.29	317.35	432.924	489.303	593.825	704.652	768.689	772.2	772.2	759.637	720.019	666.295	601.577	530.11	454.098	372.878	309.666	271.337	496.467	553.195	563.399	561.12	536.646	499.908	457.869	428.493
7317	0.85	0.5	189.986	254.242	444.08	592.983	573.479	545.67	496.014	437.61	376.439	313.665	249.118	185.619	121.436	136.42	130.051	138.204	158.631	173.138	180.26	182.025	180.866	175.956	172.549	187.126	376.119	611.008	724.187	734.479	680.982	610.642	533.872	456.493	379.23	298.795	217.946	301.079	361.139	430.575	411.008	527.38	654.443	746.189	733.352	708.733	680.043	649.113	633.972
998	0.85	0.5	750.3	750.3	750.3	750.3	750.3	747.968	694.355	625.127	616.339	661.218	710.954	745.544	750.3	750.3	750.3	749.216	720.518	608.445	428.074	240.736	109.69	73.4912	73.6141	73.7185	73.7261	73.625	73.7342	73.6401	73.6226	70.8942	74.7255	74.7377	93.4463	167.941	252.702	332.922	409.99	455.993	545.755	713.128	750.3	750.3	688.267	574.304	508.209	491.321	496.457
1716	0.85	0.5	86.5997	98.0578	179.905	256.86	230.55	210.518	203.853	188.414	170.043	151.395	134.681	132.254	127.258	191.306	225.631	226.132	287.058	424.039	396.84	358.407	315.771	268.11	223.232	182.237	256.111	505.173	673.898	695.34	672.156	633.134	556.671	466.946	381.002	295.998	209.226	476.951	633.815	668.828	652.588	706.047	747.083	725.487	652.464	557.605	462.85	428.23	542.061
1896	0.85	0.5	556.777	604.077	668.933	745.12	736.92	730.54	702.858	667.231	629.438	609.087	584.036	558.163	525.142	541.725	568.232	560.278	538.098	524.691	498.162	469.738	442.867	413.037	388.49	367.483	389.236	466.559	509.936	521.916	551.163	540.657	525.797	512.739	487.931	468.836	451.969	475.986	534.334	564.814	599.147	654.92	660.107	646.184	618.962	587.522	564.639	536.742	513.792
1883	0.85	0.5	211.871	415.177	583.249	724.28	691.884	649.721	582.945	499.691	411.081	329.582	246.556	175.815	106.606	193.132	283.32	237.811	205.102	199.74	184.906	171.461	150.792	127.561	106.584	88.9006	330.855	620.667	725.264	727.8	698.734	640.211	563.195	481.653	390.566	300.139	209.115	149.499	281.036	411.336	526.224	707.301	703.811	654.614	586.248	503.798	421.663	331.963	250.072
1285	0.85	0.5	395.02	388.716	383.295	380.038	395.332	407.696	401.555	394.486	387.354	380.629	373.545	377.485	377.67	382.444	389.697	392.334	391.954	467.709	503.818	497.752	491.666	485.314	480.134	473.694	466.14	458.685	450.893	442.486	441.58	439.363	432.383	424.49	416.098	407.539	399.307	392.081	387.951	411.685	439.871	455.319	455.451	456.3	450.888	444.053	436.456	428.532	420.174
1266	0.85	0.5	361.154	370.04	374.297	376.853	383.565	388.464	384.1	378.228	371.516	365.423	358.787	352.215	343.723	335.93	328.274	319.651	312.494	308.521	305.559	300.298	298.002	295.367	293.279	290.274	287.163	284.94	283.016	282.095	284.832	286.219	285.152	281.681	276.794	272.345	269.366	286.508	298.979	341.348	398.616	423.283	442.195	464.954	460.682	455.703	449.961	442.501	434.456
1176	0.85	0.5	665.356	635.513	604.229	570.704	541.455	522.407	511.689	507.82	511.586	682.211	677.724	685.334	676.066	666.343	678.544	673.388	665.999	658.412	650.893	636.689	612.779	600.846	602.684	575.731	545.685	526.897	506.101	476.692	491.019	590.53	683.969	686.1	682.667	666	639.203	609.878	583.123	626.53	623.457	605.947	580.889	567.241	561.548	559.339	545.789	551.912	644.732
924	0.85	0.5	404.308	394.871	405.902	426.782	416.595	419.703	408.638	392.254	392.738	380.085	377.066	396.647	412.412	420.785	446.397	448.293	446.408	438.369	476.441	537.762	524.079	508.338	497.435	491.07	477.38	498.853	612.297	668.813	679.06	679.219	678.827	669.965	661.608	647.248	648.477	677.58	676.877	676.197	676.763	679.27	670.973	652.603	624.415	589.034	557.115	527.301	538.011
758	0.85	0.5	463.485	487.464	506.883	514.791	499.39	477.534	453.995	438.625	441.641	438.91	441.508	444.655	444.735	444.526	439.756	438.118	429.277	418.391	401.139	372.468	355.046	363.671	359.298	355.587	357.69	357.056	355.442	358.728	347.607	346.887	361.727	371.199	376.759	415.796	454.493	485.672	520.525	548.062	572.002	587.596	586.444	574.383	553.798	513.11	482.326	472.471	463.392
1257	0.85	0.5	0	0	0	0	0	0	0	0	0	0	0	0	0	0	0	0	0	0	0	0	0	0	0	0	0	0	0	0	0	0	0	0	0	0	0	0	0	0	0	0	0	0	0	0	0	0	0
895	0.85	0.5	519.054	520.752	521.406	522.767	519.642	515.525	506.569	499.329	497.714	495.387	496.21	496.194	495.774	495.933	494.661	493.283	489.718	485.547	480.114	475.022	470.893	468.854	468.674	471.427	473.05	473.882	473.311	473.07	472.601	475.44	470.082	461.738	457.735	461.966	465.803	469.132	473.933	475.666	478.289	485.601	488.615	488.382	487.605	480.628	474.855	474.147	477.288
1317	0.85	0.5	361.132	334.782	302.555	269.743	251.341	267.832	232.871	342.942	417.266	408.258	389.932	379.774	366.192	345.355	320.218	289.729	273.618	294.671	327.335	311.5	298.932	289.038	309.814	298.753	283.47	270.236	260.654	244.282	229.754	209.983	185.874	162.81	140.238	120.731	113.648	111.886	107.827	103.951	99.9686	93.4995	83.8922	76.9044	78.9757	77.6968	72.258	72.5606	73.3293
1242	0.85	0.5	630.733	613.292	594.452	570.961	541.76	502.466	445.706	381.857	372.362	640.1	640.1	640.1	640.1	640.1	640.1	640.09	633.3	600.661	553.506	517.851	519.348	519.379	506.108	493.021	479.141	470.746	458.432	440.962	417.798	375.847	309.922	246.156	200.385	174.697	155.887	143.418	224.446	359.51	412.629	424.163	424.15	395.124	338.265	272.276	229.307	210.874	221.4
107	0.85	0.5	267.259	334.556	397.259	428.743	416.826	387.332	346.49	298.738	251.477	205.216	159.526	143.474	147.81	190.344	230.204	235.276	222.045	211.091	190.104	163.88	138.497	115.955	109.834	332.584	568.597	616.7	616.7	616.7	597.226	551.678	495.122	430.214	364.86	299.931	235.049	287.4	387.62	530.617	615.668	608.161	591.424	551.327	498.092	436.363	373.518	309.909	254.721
1841	0.85	0.5	202.466	293.964	498.62	580.869	573.463	552.517	505.243	448.012	385.652	321.236	253.922	190.502	123.283	153.386	178.033	194.21	171.593	178.338	171.193	158.914	144.596	127.053	109.361	101.88	257.552	544.846	583.2	583.2	559.508	507.712	446.986	382.535	314.305	243.554	176.974	279.317	351.972	396.136	413.145	456.104	478.054	493.702	465.588	424.623	378.686	328.386	279.376
907	0.85	0.5	269.125	290.493	315.294	344.334	352.99	351.076	340.007	322.706	308.097	295.768	281.684	265.913	247.873	230.238	219.898	208.295	196.667	179.563	170.113	168.498	167.924	166.983	167.015	167.237	165.991	168.36	227.472	315.25	380.544	457.048	491.13	491.76	479.401	462.001	454.191	484.553	501.449	527.03	568.596	568.9	568.9	568.9	568.413	559.244	538.762	523.24	529.973
80	0.85	0.5	363.566	387.689	424.384	443.311	432.175	413.569	381.004	340.576	301.907	264.541	246.263	277.219	305.89	316.269	339.757	359.938	356.095	363.039	346.137	314.872	284.351	268.887	264.335	353.186	398.977	476.38	557.913	560.844	547.772	514.16	474.714	424.755	378.195	342.352	329.668	372.132	435.458	482.898	540.922	550.353	533.676	510.541	487.847	443.715	400.082	352.745	344.039
1236	0.85	0.5	78.9298	78.5945	78.2719	77.4149	76.1585	69.9781	56.8692	53.3748	53.3894	53.387	53.4244	54.8779	59.048	62.8797	68.109	75.8658	81.7848	84.9016	80.935	72.7528	69.3018	87.4749	108.886	118.695	127.396	135.754	145.052	154.472	162.914	172.423	181.608	180.014	179.436	181.575	184.048	185.725	186.75	188.154	190.991	195.728	199.713	199.993	194.151	185.312	179.213	176.611	174.608
981	0.85	0.5	534.1	534.1	534.1	534.1	534.1	534.1	534.1	534.1	534.1	534.1	534.1	534.1	534.1	534.1	534.1	534.1	533.136	530.006	485.363	413.358	340.031	265.661	191.907	119.442	58.429	52.8514	51.7897	51.7611	51.8638	51.8355	69.0877	101.279	130.682	158.785	186.059	213.035	240.115	273.068	314.886	392.078	441.546	482.578	490.976	472.877	453.263	432.892	413.046
1093	0.85	0.5	112.627	110.836	117.829	125.066	131.741	141.622	143.216	135.731	124.36	116.884	111.156	112.366	117.82	133.238	168.543	188.232	214.584	282.995	300.127	298.425	288.931	275.313	265.566	255.376	251.07	417.208	487.06	501.524	508.195	523.33	499.39	458.228	408.774	354.904	300.69	324.767	361.9	345.532	337.639	313.244	400.967	425.104	399.312	362.186	317.867	271.339	225.179
1709	0.85	0.5	175.619	208.554	296.141	366.889	385.856	377.37	357.898	331.893	298.541	256.887	212.905	173.857	134.449	135.218	166.718	192.069	208.157	293.295	321.591	320.054	308.59	294.845	285.159	288.04	332.134	476.327	509.9	509.892	509.327	503.627	479.666	438.684	385.184	324.375	266.047	231.326	198.009	202.235	223.034	264.985	315.691	340.915	334.466	314.58	283.174	247.504	215.272
1017	0.85	0.5	59.4184	75.5204	138.685	183.431	180.736	170.692	156.66	140.391	122.862	104.186	84.8682	65.9724	51.2209	53.8974	52.9583	50.7605	59.247	111.635	125.338	130.643	126.75	120.868	115.895	110.856	136.755	312.272	486.69	509.4	509.4	484.225	430.929	375.779	349.439	310.138	270.338	491.421	487.987	478.649	463.8	494.707	506.078	482.488	439.377	389.173	335.859	280.818	249.728
1194	0.85	0.5	198.538	202.005	207.628	211.346	213.262	211.947	206.165	198.38	190.904	189.44	190.138	191.654	194.223	194.628	195.109	196.706	197.657	197.541	194.599	189.413	184.777	239.468	327.199	347.662	361.458	380.199	397.296	410.466	453.11	500.61	505.697	503.988	497.415	488.164	477.357	465.176	451.674	438.488	425.844	413.288	400.037	385.867	372.089	359.192	346.024	332.961	319.868
[truncated: 433 more columns]

## Sheet: Outflow(WG inflow-With Demand)
grand_id	a1	a2	a3	1980-01	1980-02	1980-03	1980-04	1980-05	1980-06	1980-07	1980-08	1980-09	1980-10	1980-11	1980-12	1981-01	1981-02	1981-03	1981-04	1981-05	1981-06	1981-07	1981-08	1981-09	1981-10	1981-11	1981-12	1982-01	1982-02	1982-03	1982-04	1982-05	1982-06	1982-07	1982-08	1982-09	1982-10	1982-11	1982-12	1983-01	1983-02	1983-03	1983-04	1983-05	1983-06	1983-07	1983-08	1983-09	1983-10
610	0.85	0.5	0.5	2204.19	4583.12	3663.81	2124	3935.16	4905.99	2065.12	1488.71	1484.12	1556.25	1510.86	1555.91	1541.14	1378.83	1864.78	1635.13	1612.51	1597.33	1552.23	1400.41	1332.2	1376.6	1332.2	1376.6	1376.62	1247.78	1401.65	1453.52	1569.97	1538.92	1509.48	1216.63	1159.68	1198.34	1159.68	1198.34	1198.33	1086.69	1222.71	1251.73	1370.32	1340.89	1315.68	1227.17	1171.31	1210.35
1294	0.85	0.5	0.5	47.9714	43.329	47.9714	46.4247	47.9952	46.6115	45.9256	45.8576	44.2334	45.666	44.1887	45.6616	45.6532	41.2351	45.6532	44.1805	45.6914	44.2227	104.536	104.563	100.826	104.163	100.794	104.154	104.09	94.0183	104.099	100.755	104.152	100.992	132.642	132.601	128.047	132.258	127.992	132.258	132.258	119.459	132.258	128.006	132.321	128.204	112.332	112.318	108.541	112.094
1247	0.85	0.5	0.5	112.884	101.974	112.905	109.487	113.233	112.087	117.535	115.801	110.572	112.991	109.131	112.769	112.788	101.873	112.82	109.278	113.227	110.033	135.842	135.052	129.042	382.229	174.585	162.939	146.429	175.225	166.9	127.959	471.42	349.824	196.436	161.489	155.289	158.496	153.067	158.169	158.165	142.859	158.165	153.61	158.879	155.576	131.704	130.408	125.125	128.903
1186	0.85	0.5	0.5	81.2906	73.4238	81.2918	78.7593	80.7864	78.5688	81.3347	80.684	78.0041	80.5982	77.9976	80.5975	80.7159	72.9047	80.7338	78.2286	53.3315	51.7732	53.5547	53.3547	51.5902	53.3075	51.5874	53.307	53.3861	48.2197	53.4005	51.7082	53.6786	52.015	53.7841	53.5519	51.823	53.5504	51.823	53.5504	53.5503	48.368	53.5558	51.8791	71.1648	68.9544	71.2346	71.091	68.7741	71.0665
355	0.85	0.5	0.5	189.789	171.422	189.789	183.667	206.851	238.407	286.752	239.263	185.931	166.635	149.705	154.696	154.703	139.732	154.703	149.712	216.089	272.185	398.643	379.942	299.153	229.381	217.107	185.265	139.674	150.53	185.268	217.111	233.92	276.258	185.146	179.262	126.234	106.542	102.959	106.391	106.39	96.0946	106.39	180.267	1500.75	535.933	368.109	358.262	270.929	230.318
1302	0.85	0.5	0.5	21.1851	19.1548	21.3011	20.9573	21.7709	23.6766	23.9393	22.3912	20.1359	20.1975	19.3194	19.9634	20.0942	18.1576	20.1339	19.6067	21.0246	20.2514	39.1507	38.9367	34.3304	35.1233	33.7451	34.8144	35.2184	31.8221	35.4251	34.5436	36.0669	38.1647	31.2618	30.4764	27.5285	27.62	26.6311	27.5188	27.5808	24.912	27.6294	27.2155	28.4864	28.4485	25.7304	25.8818	23.6117	24.0756
1231	0.85	0.5	0.5	41.8541	37.8037	41.8985	41.1423	43.3556	44.4881	45.3957	41.9309	40.4559	41.8044	40.4559	41.8044	41.7937	37.7492	41.9157	41.2902	42.1486	21.9504	23.0378	22.0941	21.2758	21.985	21.2758	21.985	21.9671	19.8413	22.0365	21.4421	22.5352	59.8412	62.1198	59.7639	57.8118	59.7388	57.8118	59.7388	59.7283	53.9481	59.7998	58.7968	60.6757	69.9719	71.9531	70.6904	68.2488	70.5238
1140	0.85	0.5	0.5	4.39519	3.96985	4.39519	4.08353	4.20414	3.07253	2.53326	3.19826	3.87076	4.19416	4.05886	4.19416	4.19811	3.79184	4.19811	4.06177	4.07321	3.49672	2.61254	3.22191	3.54846	3.97443	3.87588	4.00507	4.0071	3.61932	4.0071	3.87784	4.0071	3.64559	2.70549	2.88696	3.32428	3.81304	3.73012	3.85446	3.85338	3.48047	3.85338	3.72907	3.81455	3.24681	2.68999	2.59905	3.10715	3.70552
1296	0.85	0.5	0.5	16.1878	14.6213	16.1882	15.6671	15.0057	14.5283	15.0166	15.0137	14.5255	15.0058	14.5207	15.0048	15.0083	13.556	15.0088	14.5254	12.8434	12.4296	12.8467	12.8472	12.4273	12.841	12.4268	12.841	12.8448	11.6018	12.8449	12.4309	13.9001	13.4557	13.9046	13.9038	13.4517	13.8983	13.45	13.8983	13.8962	12.5514	13.8963	13.4487	16.6741	16.1395	16.6781	16.6764	16.1362	16.673
1277	0.85	0.5	0.5	8.58366	7.75298	8.58366	8.30753	8.69091	9.34026	10.1748	9.77993	8.27911	7.9859	7.64689	7.90178	7.90649	7.1416	7.9094	7.66157	7.98046	7.90795	9.62255	9.22384	8.06298	8.10895	7.73891	7.99688	7.99569	7.22246	7.99689	7.79545	8.44854	8.58937	8.36102	7.84948	7.17137	7.38787	7.14635	7.38456	7.38423	6.66963	7.38429	7.23165	7.5272	7.77198	7.88211	7.65078	7.00318	7.07313
1280	0.85	0.5	0.5	57.1861	51.652	57.1861	56.6249	60.5754	67.0837	72.4324	67.5688	56.7242	57.1798	55.3353	139.388	124.271	82.2071	150.791	74.7996	73.7392	72.6188	82.4897	76.2914	65.061	67.1479	64.9819	67.1479	67.1512	60.6527	67.1939	45.3234	49.4811	50.4799	54.1409	50.0311	44.4415	45.9228	44.4415	45.9228	45.9215	41.4775	45.9437	27.1191	29.1403	28.8969	31.2703	29.0344	26.1478	27.0194
182	0.85	0.5	0.5	127.031	340.128	233.711	123.167	130.295	131.608	136.042	135.039	124.829	127.029	122.931	127.029	127.048	92.6221	127.048	123.164	30.1289	30.7246	31.9104	31.3065	28.9277	29.3814	28.4336	29.3814	62.2743	476.703	408.012	488.086	161.614	133.238	138.915	136.77	126.802	128.908	124.749	293.078	388.075	509.328	695.356	290.288	161.952	135.214	140.563	137.629	127.89	130.117
1152	0.85	0.5	0.5	0	0	0	0	0	0	0	0	0	0	0	0	0	0	0	0	0	0	0	0	0	0	0	0	0	0	0	0	0	0	0	0	0	0	0	0	0	0	0	0	0	0	0	0	0	0
1295	0.85	0.5	0.5	25.268	22.8227	25.2679	24.4514	25.4807	27.7044	29.4472	29.1386	25.5557	25.2973	24.4401	25.2548	25.0915	22.6633	25.0915	24.3074	25.6701	16.5912	18.3062	18.7173	16.3526	16.6781	16.0869	16.6231	16.635	15.0252	16.6344	16.097	16.9305	41.9029	43.4233	43.5176	40.6325	39.2452	37.8306	39.0916	38.7615	35.0104	38.7615	37.5171	98.5228	57.5561	60.6407	59.2677	55.4654	56.4732
629	0.85	0.5	0.5	2047.8	4351.83	3811.57	2152.5	3307.43	4757.68	2221.51	1751.91	1697.16	1753.79	1697.04	1753.15	1752.29	1582.05	1778.4	1681.42	1730.88	1666.98	1725.1	1576.15	1566.49	1616.34	1566.47	1624.33	1649.53	1494.96	1631.02	1557.28	1600.86	1543.55	1596.98	1411	1304.33	1348.93	1306.36	1520.16	1365.69	1307.35	1558.86	1310.01	1335.38	1284.11	1327.66	1600.7	1350.73	1474.93
1266	0.85	0.5	0.5	12.5415	11.3279	12.551	12.1837	12.6603	12.2551	12.713	12.4528	11.6987	12.0292	11.6411	12.0292	12.1124	10.9423	12.1299	11.7878	12.2716	9.66365	10.1312	10.1411	9.52357	9.82567	9.50871	9.82567	9.95379	8.99052	9.95742	9.64377	10.0591	9.20481	9.50866	9.45952	8.98233	9.18806	8.89167	9.18806	9.20983	8.31856	9.21018	8.94243	9.25915	14.0237	14.5054	14.3435	13.7247	14.1316
1176	0.85	0.5	0.5	32.1819	29.0675	32.1819	31.171	32.2193	31.4404	32.261	32.101	85.5311	63.1121	179.66	128.645	31.8612	28.7778	31.8612	30.8334	31.9251	30.987	41.0019	40.8588	39.3169	40.6234	39.313	40.6234	40.6233	36.692	40.6233	39.3215	40.6277	39.4059	52.1457	49.0866	40.6792	41.9061	40.5543	41.9061	41.9061	37.8507	41.9061	40.5635	41.9453	40.6533	35.0502	35.0121	33.766	34.8514
758	0.85	0.5	0.5	65.6167	59.2667	65.6167	63.5	66.1287	60.8792	63.9866	63.1708	60.2122	62.2985	60.1367	62.1412	62.1247	56.1126	62.1247	60.1206	62.2306	52.708	56.1852	55.4929	53.4778	54.4502	52.6937	54.4502	54.4458	49.1768	54.4458	52.6894	54.5573	42.9557	44.795	44.8464	42.6847	43.7035	42.2937	43.7035	43.6886	39.4607	43.6886	42.2793	43.7095	72.9605	77.2946	76.963	72.864	74.8237
1242	0.85	0.5	0.5	16.4005	14.8134	16.397	15.8503	21.412	35.658	44.8917	36.7392	49.9529	199.534	46.2621	49.8173	48.2243	37.6049	33.845	27.9754	23.2107	34.6748	40.9542	31.6334	25.337	18.1907	16.2392	16.7805	16.7961	10.6268	11.7651	11.3795	15.5235	24.0538	28.5831	27.9483	21.0873	11.7654	11.3859	11.7654	11.7575	6.65687	7.36562	7.11894	10.2311	15.4446	19.9905	17.9608	12.9902	7.60455
1236	0.85	0.5	0.5	1.89923	1.71543	1.89923	1.90572	1.96921	2.46743	1.53315	1.03718	0.727394	0.847641	0.84433	1.02644	1.02687	0.927493	1.02687	1.00164	1.14614	1.18116	2.1281	1.91782	1.49531	1.54182	1.49208	1.54182	1.54177	1.39257	1.54177	1.508	1.55807	1.6939	4.25648	4.17158	3.37695	3.26558	3.16024	3.26558	3.26563	2.9496	3.26563	3.25797	3.53952	3.77774	4.71641	4.41751	3.667	3.54609
1194	0.85	0.5	0.5	8.93771	8.07277	8.93936	8.66747	8.99711	9.48278	10.3877	10.0334	9.16422	8.94989	8.61077	8.8978	8.86468	8.0068	8.8665	8.59232	8.88252	8.90308	9.2174	9.03688	8.23216	8.34885	8.02974	8.2974	8.17152	7.38072	8.17242	7.91231	8.17979	7.99636	31.0319	31.0832	29.4819	29.1428	28.0025	28.9359	28.9777	26.1734	28.9792	28.3033	29.2946	29.2609	17.3182	16.948	15.902	16.2303
[truncated: 434 more columns]

## Sheet: Storage(WG inflow-With Demand)
grand_id	a1	a2	a3	1980-01	1980-02	1980-03	1980-04	1980-05	1980-06	1980-07	1980-08	1980-09	1980-10	1980-11	1980-12	1981-01	1981-02	1981-03	1981-04	1981-05	1981-06	1981-07	1981-08	1981-09	1981-10	1981-11	1981-12	1982-01	1982-02	1982-03	1982-04	1982-05	1982-06	1982-07	1982-08	1982-09	1982-10	1982-11	1982-12	1983-01	1983-02	1983-03	1983-04	1983-05	1983-06	1983-07	1983-08	1983-09	1983-10
610	0.85	0.5	0.5	36700	36700	36700	36700	36700	36700	36698.6	36699	36700	36700	36700	36700	36700	36700	36700	36696.8	36584.8	36353.2	36040.7	35485.6	34988.2	34527.2	34085.8	33655.1	33235.8	33120	33415.5	33517.6	32966.5	32234.8	31495.5	30901.1	30508.3	30154.9	29838.4	29745.3	29946.8	30367.8	31253	32327.2	32435.7	31973.2	31502.5	31523.1	31739.8	31970.7
1294	0.85	0.5	0.5	963.113	945.033	924.822	907.055	905.114	911.338	889.92	854.015	830.44	844.076	851.125	919.567	962.343	1017.07	1147.67	1339.45	1480.23	1818.69	2102.96	2182.52	2246.97	2312.78	2418.78	2485.48	2537.42	2591.13	2639.18	2651.45	2640.93	2626.93	2579.52	2511.47	2440.47	2367.92	2294.66	2229.74	2183.1	2189.25	2252.34	2303.88	2266.73	2236.12	2192.99	2145.12	2089.3	2029.96
1247	0.85	0.5	0.5	2153.43	2104.24	2054.68	1989.61	1936.51	1894.58	1805.22	1699.24	1604.66	1918.41	1922.79	2115.51	2177.54	2162.37	2202.29	2221.92	2218	2188.22	2142.01	2084.69	2027.84	2319.51	2590.8	2590.8	2590.46	2590.79	2590.8	2587.38	2585.85	2590.8	2590.45	2575.55	2534.27	2479.44	2417.28	2353.71	2299	2284.01	2262.85	2252.18	2199.72	2147.15	2088.25	2018.78	1945.6	1871.29
1186	0.85	0.5	0.5	1522.5	1722.36	1750.35	1810	1864.01	1852.36	1804.38	1739.72	1669.39	1606.37	1545.7	1487.29	1424.23	1364.13	1307.06	1248.67	1214.19	1313.21	1321.91	1297.94	1272.29	1246.18	1231.82	1215.49	1194.77	1221.34	1238.75	1229.48	1215.41	1192.35	1157.91	1112.5	1061.54	1015.35	975.793	1188.32	1289.13	1410.56	1567.22	1627.46	1611.62	1584.86	1541.62	1482.2	1417.03	1352.85
355	0.85	0.5	0.5	339.276	299.316	281.702	418.445	954.627	1242.78	1026.86	706.938	479.953	315.376	276.8	332.468	360.987	359.714	409.281	660.324	1258.96	1752.71	1520.94	1084.34	715.444	455.674	255.13	174.829	172.271	172.231	174.78	283.617	579.647	829.476	717.735	484.956	308.962	205.408	240.507	375.516	547.221	705.665	957.444	1342.42	1760.6	1760.6	1609.42	1257.22	1003.57	910.102
1302	0.85	0.5	0.5	579.513	575.632	569.647	562.372	553.281	540.864	520.602	503.732	501.494	515.66	523.625	550.446	565.288	584.693	620.859	654.37	677.323	827.17	915.98	900.16	885.372	873.134	864.896	852.653	835.449	819.119	802.441	780.895	759.739	735.106	706.605	684.337	664.845	649.186	635.413	624.723	618.093	623.58	642.109	659.698	646.308	632.925	618.441	605.249	592.335	582.261
1231	0.85	0.5	0.5	476.214	571.996	607.498	622.505	630.739	623.365	599.179	570.162	540.276	510.946	481.563	453.786	424.524	396.747	369.701	341.861	322.095	518.143	610.965	629.059	636.034	644.769	692.734	740.648	770.333	807.234	844.511	870.142	891.764	891.923	864.201	825.451	781.636	736.195	694.303	871.759	921.969	958.945	1052.19	1072.65	1068.18	1055.72	1025.21	982.605	934.711	882.468
1140	0.85	0.5	0.5	1035.31	1031.62	1026.73	1021.11	1016.68	1013.32	1009.16	1005.13	1000.54	997.445	993.417	991.908	987.925	983.598	980.327	975.431	970.87	967.012	962.572	958.666	954.408	950.139	945.854	941.635	937.329	933.293	928.813	923.604	921.202	922.407	925.641	921.65	917.307	912.789	908.399	905.108	903.277	917.879	918.333	915.335	910.335	906.123	901.839	897.672	893.379	943.093
1296	0.85	0.5	0.5	697.598	719.401	720.753	718.766	717.606	716.48	706.124	693.779	682.085	671.705	660.854	650.379	639.212	632.65	626.454	617.271	609.365	638.882	652.893	645.542	638.948	632.771	661.627	669.188	667.491	665.995	664.522	662.164	680.306	688.359	681.609	671.355	661.135	652.413	644.446	666.949	676.103	712.898	755.695	792.162	812.794	840.68	834.078	824.289	813.862	802.764
1277	0.85	0.5	0.5	810.284	805.788	799.868	793.868	796.091	796.431	785.021	772.27	761.96	755.097	748.214	750.571	749.501	750.683	756.624	765.08	765.107	784.172	797.433	790.074	784.383	778.849	773.38	767.36	760.74	755.56	750.9	746.206	745.566	742.503	735.113	726.602	718.902	711.845	705.419	700.463	697.725	701.85	709.267	715.513	714.422	711.006	704.642	697.098	689.613	683.255
1280	0.85	0.5	0.5	1179.65	1123.78	1064.15	999.345	933.361	861.27	757.106	651.764	764.646	1158.69	1185.56	1209.88	1211.3	1211.3	1211.3	1211.3	1201.11	1168.84	1104.28	1025.29	965.876	951.89	987.763	954.925	916.736	885.325	850.129	814.582	788.592	760.84	733.749	684.31	641.385	605.337	572.966	543.161	514.094	500.686	490.027	484.401	470.888	454.386	425.737	392.308	362.105	340.153
182	0.85	0.5	0.5	601.383	939.31	1094.12	1091.15	1056.21	948.024	811.95	684.101	572.035	464.565	357.722	253.864	146.529	141.28	187.961	258.633	249.453	229.259	183.667	152.066	136.504	124.714	182.154	531.433	1039.4	1102.7	1102.7	1102.7	1100.74	1064.61	991.275	871.514	770.71	680.172	674.514	994.486	1076.94	1099.36	1101.39	1095.01	1092.71	1068.5	971.416	853.125	756.55	664.091
1152	0.85	0.5	0.5	0	0	0	0	0	0	0	0	0	0	0	0	0	0	0	0	0	0	0	0	0	0	0	0	0	0	0	0	0	0	0	0	0	0	0	0	0	0	0	0	0	0	0	0	0	0
1295	0.85	0.5	0.5	284.354	339.082	358.504	372.454	377.56	375.392	356.267	332.99	311.223	295.316	279.414	269.575	261.232	269.514	266.166	255.339	253.593	294.86	321.848	319.02	319.145	316.929	381.485	408.691	422.007	438.536	458.693	487.519	565.903	586.057	563.288	533.968	500.181	473.725	476.792	598.699	667.777	746.219	822.867	863.019	858.664	847.572	809.557	769.243	730.51	688.963
629	0.85	0.5	0.5	109.727	133.912	168.858	151.226	107.525	83.8844	65.3072	62.4882	70.4355	78.8723	88.328	98.0479	107.232	114.009	114.234	87.8695	39.5982	24.734	24.6803	73.5719	82.194	91.1152	98.8444	107.865	116.464	124.012	124.016	100.47	53.3806	28.8482	28.789	73.6743	82.2125	86.0581	91.8683	101.3	108.721	113.766	114.597	91.1784	48.5587	37.4962	37.4723	44.1359	54.4686	64.7518
1266	0.85	0.5	0.5	407.02	416.085	420.485	423.144	429.885	434.471	429.445	423.016	416.084	410.03	403.509	397.075	388.68	380.921	373.26	364.55	357.194	352.821	349.229	343.23	340.422	337.481	335.165	331.973	328.606	326.067	323.795	322.471	324.699	325.406	323.562	319.329	313.842	308.997	305.738	322.638	334.863	376.979	433.985	458.361	476.947	499.564	495.327	490.453	484.976	477.909
1176	0.85	0.5	0.5	665.389	635.581	604.331	570.826	541.58	522.396	511.362	507.21	510.924	682.221	677.745	685.338	676.099	666.407	678.64	673.516	666.128	658.463	650.706	636.23	612.236	600.333	602.202	575.281	545.267	526.509	505.744	476.363	490.715	590.209	683.784	686.1	682.664	666.022	639.279	610.007	583.306	626.765	623.744	606.282	581.254	567.588	561.775	559.393	545.752	551.863
758	0.85	0.5	0.5	457.773	481.793	501.26	509.233	493.661	471.541	447.333	431.22	434.321	432.038	435.088	438.753	439.367	439.678	435.443	434.377	426.066	415.544	397.665	367.93	349.911	358.402	354.233	350.714	353.014	352.577	351.18	354.725	343.855	343.124	357.561	366.4	371.643	410.857	449.88	481.373	516.552	544.408	568.668	584.595	583.767	571.631	549.62	506.782	474.895	464.953
1242	0.85	0.5	0.5	633.382	620.827	606.872	588.439	561.696	514.775	438.685	355.786	337.93	640.1	640.1	640.1	640.1	640.1	640.1	640.1	632.784	592.847	529.5	479.851	474.92	475.272	466.752	459.086	450.703	447.19	439.406	426.624	406.204	360.184	284.239	209.251	156.137	131.307	117.879	110.634	196.845	335.95	392.299	407.152	408.968	377.565	313.342	239.495	192.261	174.773
1236	0.85	0.5	0.5	71.5602	71.4805	71.4181	70.799	69.7501	63.4913	53.8888	53.3753	53.398	53.386	53.4545	54.9465	59.3006	63.3136	68.7239	76.6628	82.7017	85.8487	81.6156	73.0325	69.4747	87.7232	109.211	119.098	127.877	136.31	145.682	155.17	163.672	173.145	181.856	179.507	178.57	180.794	183.456	185.322	186.539	188.127	191.147	196.022	200.006	200.024	193.486	183.859	177.442	174.951
1194	0.85	0.5	0.5	126.369	130.63	137.086	141.695	144.51	143.72	137.654	129.316	121.718	120.574	121.803	123.839	126.952	127.908	128.971	131.218	132.854	133.291	130.485	125.238	120.839	176.025	264.256	285.224	299.595	318.943	336.651	350.455	393.726	448.16	467.068	457.882	443.315	427.052	409.954	391.583	371.768	352.559	333.902	315.012	295.3	274.213	256.825	243.897	231.123	218.748
[truncated: 434 more columns]

## Sheet: Outflow(OBS inflow-With Demand)
grand_id	a1	a2	a3	1980-01	1980-02	1980-03	1980-04	1980-05	1980-06	1980-07	1980-08	1980-09	1980-10	1980-11	1980-12	1981-01	1981-02	1981-03	1981-04	1981-05	1981-06	1981-07	1981-08	1981-09	1981-10	1981-11	1981-12	1982-01	1982-02	1982-03	1982-04	1982-05	1982-06	1982-07	1982-08	1982-09	1982-10	1982-11	1982-12	1983-01	1983-02	1983-03	1983-04	1983-05	1983-06	1983-07	1983-08	1983-09	1983-10
753	0.85		0.5	1511.1	1364.87	1511.1	1462.36	1511.1	1462.36	1510.81	1510.81	1462.07	1510.81	1462.07	1510.81	1510.81	1364.6	1510.81	1462.07	1510.81	1462.07	1611.09	1611.09	1559.11	1611.09	1559.11	1611.09	1611.09	1455.17	1611.09	1559.11	1611.09	1559.11	1852.6	1852.6	1792.84	1852.6	1792.84	1852.6	1852.6	1673.32	1852.6	1792.84	1852.6	1792.84	1828.27	1828.27	1769.29	1828.27
870	0.85		0.5	1733.94	1566.14	1733.94	1678.01	1733.94	1678.01	1733.94	1733.48	1677.56	1733.48	1677.56	1733.48	1733.48	1565.73	1733.48	1677.56	1733.48	1677.56	1733.48	1818.96	1760.29	1818.96	1760.29	1818.96	1818.96	1642.94	1818.96	1760.29	1818.96	1760.29	1818.96	2229.31	2157.4	2229.31	2157.4	2229.31	2229.31	2013.57	2229.31	2157.4	2229.31	2157.4	2229.31	1807.37	1749.07	1807.37
597	0.85		0.5	1103.05	996.299	1103.05	1067.46	1103.05	1067.46	1102.03	1102.03	1066.48	1102.03	1066.48	1102.03	1102.03	995.38	1102.03	1066.48	1102.03	1066.48	652.163	652.163	631.125	652.163	631.125	652.163	652.163	589.05	652.163	631.125	652.163	631.125	772.66	772.66	747.736	772.66	747.736	772.66	772.66	697.887	772.66	747.736	772.66	747.736	1380.35	1380.35	1335.82	1380.35
307	0.85		0.5	489.216	441.872	489.216	473.434	489.216	473.434	475.301	475.301	459.969	475.301	459.969	475.301	475.301	429.304	475.301	459.969	475.301	459.969	545.608	545.608	528.007	545.608	528.007	545.608	545.608	492.807	545.608	528.007	545.608	528.007	581.316	581.316	562.564	581.316	562.564	581.316	581.316	525.06	581.316	562.564	581.316	562.564	548.687	548.687	530.988	548.687
1753	0.85		0.5	6521.26	3979.59	12566	5893.79	4818.53	2846.91	2943.29	2411.58	2382.91	2016.22	2597.87	2108.98	1921.85	3515.83	1994.43	2342.33	1353.45	2913.52	2589.16	2513.1	2160.59	1936.87	1875.61	3634.95	9868.21	8019.04	5987.64	3054.27	2032.79	2072.09	2857.59	3647.85	2802.99	2615.28	3821.42	9770.96	5642.51	6001.35	3955.1	7777.35	8012.1	4033.19	3348.46	3134.67	2062.88	1723.19
297	0.85		0.5	782.912	707.147	782.912	757.657	782.912	757.657	782.912	730.068	706.518	730.068	706.518	730.068	730.068	659.416	730.068	706.518	730.068	706.518	730.068	1088.51	980.249	1012.92	980.249	1012.92	1012.92	914.899	1012.92	980.249	1012.92	980.249	1012.92	754.785	730.437	754.785	730.437	754.785	754.785	681.742	754.785	730.437	754.785	730.437	754.785	869.947	841.884	869.947
1036	0.85		0.5	251.539	227.196	251.539	243.425	251.539	216.448	223.663	223.663	216.448	223.663	216.448	223.663	223.663	202.018	223.663	216.448	223.663	125.416	129.596	129.596	125.416	129.596	125.416	129.596	129.596	117.055	129.596	125.416	129.596	326.691	337.581	337.581	326.691	337.581	326.691	337.581	337.581	304.912	337.581	326.691	337.581	716.322	740.2	740.2	716.322	740.2
989	0.85		0.5	50.3659	294.072	503.659	487.412	503.659	487.412	249.182	249.182	241.144	220.244	24.1144	46.6211	24.9182	44.2096	32.1525	45.8173	176.839	241.144	715.423	715.423	692.345	715.423	692.345	715.423	715.423	646.189	715.423	692.345	715.423	692.345	987.331	987.331	955.481	987.331	955.481	987.331	987.331	891.783	987.331	955.481	987.331	955.481	1004.82	1004.82	972.408	1004.82
1026	0.85		0.5	174.417	157.538	174.417	168.791	174.417	117.653	121.575	121.575	117.653	121.575	117.653	121.575	121.575	109.81	79.2198	82.3572	121.575	75.7387	78.2633	78.2633	75.7387	78.2633	75.7387	78.2633	78.2633	70.6894	78.2633	75.7387	78.2633	361.774	373.833	373.833	361.774	373.833	361.774	373.833	373.833	337.655	373.833	361.774	373.833	391.225	404.266	404.266	391.225	404.266
1848	0.85		0.5	178.424	161.157	343.995	519.751	182.654	172.668	178.424	178.424	172.668	178.424	172.668	178.424	178.424	161.157	178.424	172.668	136.801	132.388	136.801	136.801	132.388	136.801	132.388	136.801	136.801	123.562	136.801	132.388	147.002	142.26	147.002	147.002	142.26	147.002	142.26	383.794	271.525	411.104	345.741	720.22	767.348	172.617	178.371	178.371	172.617	178.371
1869	0.85		0.5	233.791	211.166	233.791	226.249	233.79	226.248	233.79	233.79	226.248	233.79	226.248	233.79	233.79	211.165	233.79	226.248	63.2511	61.2108	63.2511	63.2511	61.2108	63.2511	61.2108	63.2511	63.2511	57.1301	63.2511	61.2108	123.959	119.96	123.959	123.959	119.96	123.959	119.96	123.959	123.959	111.963	123.959	460.249	658.996	289.949	299.614	299.614	289.949	299.614
7313	0.85		0.5	506.2	460.886	511.231	502.016	541.586	534.108	270.391	258.755	259.495	269.371	262.433	267.49	265.404	239.671	265.804	260.2	307.013	1174.49	513.02	503.517	488.06	514.012	498.019	511.394	507.874	464.221	514.089	503.101	544.561	555.069	350.245	319.886	315.916	330.613	320.015	325.252	325.831	293.446	327.651	319.496	340.287	842.43	760.382	514.065	501.147	524.363
1042	0.85		0.5	88.3355	79.7869	88.3355	85.4859	87.8211	84.9882	87.8211	87.8211	84.9882	87.8211	84.9882	87.8211	87.8211	79.3223	87.8211	84.9882	71.7704	69.4552	71.7704	71.7704	69.4552	71.7704	69.4552	71.7704	71.7704	64.8248	71.7704	69.4552	79.1915	76.6369	79.1915	79.1915	76.6369	79.1915	76.6369	163.265	116.646	101.531	106.372	373.83	339.514	114.841	112.435	112.435	108.808	112.435
884	0.85		0.5	1864.99	1316.38	1647.33	1556.44	2148.06	2027.19	2399.01	2735.09	2135.21	1926.32	1909.23	1157.76	1418.47	1384.54	1780.03	2496.77	2231.99	1811.94	2174.9	2321.91	1799.35	1523.85	1116.66	1298.11	1491.74	1092.01	1428.7	1726.8	1702.26	1249.87	1965.1	2341.91	2235.75	1759.13	1909.87	2037.44	2230.11	1583.36	1371.39	775.214	983.662	1588.74	1452.27	2718.67	2041.66	2052.63
1144	0.85		0.5	1273.32	1525.81	1130.03	1055.15	1208.71	877.676	608.535	459.198	427.438	1365.12	878.872	1306.78	838.258	831.617	1027.48	809.752	898.622	1888.39	985.903	766.611	635.255	2003.37	1824.13	1273.71	1006.83	2304.2	1472.24	967.096	2305.45	2885.36	1594.78	1090.31	896.66	852.284	874.96	4031.67	1589.65	1937.48	1805.16	1347.94	1742.52	1194.07	1116.74	880.962	755.008	740.404
1006	0.85		0.5	38.1426	34.4513	38.1426	36.9122	38.1426	35.9074	37.1043	37.1043	35.9074	37.1043	35.9074	37.1043	37.1043	33.5136	37.1043	35.9074	37.1043	23.4283	24.2093	24.2093	23.4283	24.2093	23.4283	24.2093	24.2093	21.8665	24.2093	23.4283	24.2093	55.1331	56.9708	56.9708	55.1331	56.9708	55.1331	56.9708	56.9708	51.4575	56.9708	55.1331	56.9708	84.2622	87.071	87.071	84.2622	87.071
1048	0.85		0.5	274.694	275.164	399.434	1209.99	1000.39	901.675	174.237	169.688	102.949	135.915	107.363	135.141	159.72	117.611	132.76	120.426	277.238	351.427	229.987	152.86	129.985	199.601	573.201	144.538	142.486	322.586	398.467	145.662	1867.35	1674.49	886.724	322.543	186.419	180.191	187.58	218.9	278.125	338.419	577.344	1391.52	1131.65	821.534	609.762	162.869	180.023	481.152
1032	0.85		0.5	27.8091	97.2563	192.679	227.744	138.6	117.006	75.4832	77.2328	74.6411	24.3151	7.17455	10.6555	7.43622	6.85305	9.91903	34.6688	73.7682	83.1882	61.0272	49.1378	52.3986	54.2817	76.9166	52.5566	67.5264	85.8467	94.1698	49.1335	154.11	265.038	305.386	269.536	252.299	259.381	255.232	294.461	169.346	329.254	304.783	548.611	385.036	289.292	169.193	154.208	149.779	194.62
355	0.85	0.5	0.5	320.468	289.455	320.468	310.13	281.766	376.652	73.3376	63.3011	51.619	47.9517	43.9629	45.4283	45.4298	41.0334	45.4298	43.9643	220.231	613.721	496.852	477.734	392.263	323.818	308.389	318.668	318.672	232.322	235.406	151.112	175.884	346.726	90.8977	88.5371	66.728	59.3644	57.3909	59.3039	230.798	262.11	243.146	184.724	317.513	682.032	663.274	453.21	361.845	323.63
1101	0.85		0.5	154.248	139.321	154.248	201.427	154.248	149.272	154.247	154.247	149.272	154.247	149.272	154.247	154.247	139.32	154.247	149.272	154.247	60.7815	62.8075	62.8075	60.7815	62.8075	60.7815	62.8075	62.8075	56.7294	62.8075	60.7815	62.8075	108.766	112.391	112.391	108.766	112.391	108.766	112.391	112.391	107.908	225.8	319.882	348.696	218.18	163.338	163.338	158.069	163.338
1023	0.85		0.5	165.843	149.793	165.843	160.493	165.843	160.493	134.943	134.943	130.59	134.943	130.59	134.943	134.943	90.5421	37.0004	32.6474	99.6834	130.59	36.3152	36.3152	35.1437	36.3152	35.1437	36.3152	36.3152	32.8008	36.3152	35.1437	358.702	957.542	321.677	235.422	227.828	235.422	227.828	235.422	235.422	212.639	235.422	227.828	235.422	227.828	205.395	205.395	198.769	205.395
1864	0.85		0.5	101.218	91.4224	101.218	97.9526	99.0282	95.8337	99.0282	99.0282	95.8337	99.0282	95.8337	99.0282	99.0282	89.4448	99.0282	95.8337	24.7104	23.9133	24.7104	24.7104	23.9133	24.7104	23.9133	24.7104	24.7104	22.3191	24.7104	23.9133	70.3599	68.0902	70.3599	70.3599	68.0902	70.3599	68.0902	70.3599	70.3599	63.5509	70.3599	258.749	343.286	168	173.6	173.6	168	173.6
1021	0.85		0.5	27.6796	25.0009	27.6796	26.7867	27.6796	26.3543	27.2328	27.2328	26.3543	27.2328	26.3543	27.2328	27.2328	24.5973	24.0703	5.00732	23.2796	17.2951	17.8716	17.8716	17.2951	17.8716	17.2951	17.8716	17.8716	16.1421	17.8716	17.2951	17.8716	52.5108	54.2611	54.2611	52.5108	54.2611	52.5108	54.2611	54.2611	49.0101	54.2611	52.5108	54.2611	44.9999	46.4999	46.4999	44.9999	46.4999
1120	0.85		0.5	8.55444	7.72659	8.55444	8.27849	8.55444	8.27849	6.78438	6.78438	6.56552	6.78438	6.56552	6.78438	6.78438	6.12782	6.78438	6.56552	6.78438	6.56552	5.94856	5.94856	5.75667	5.94856	5.75667	5.94856	5.94856	5.3729	5.94856	5.75667	5.94856	5.75667	10.7787	10.7787	10.431	10.7787	10.431	10.7787	10.7787	9.73564	10.7787	10.431	10.7787	10.431	10.2627	10.2627	9.93161	10.2627
182	0.85	0.5	0.5	701.344	858.725	586.856	495.562	470.036	265.552	248.471	231.002	224.233	218.377	216.355	232.681	229.428	211.801	253.837	236.779	123.26	107.35	111.273	108.939	105.046	106.065	178.548	361.567	750.419	1055.81	893.059	1343.67	904.098	442.259	266.832	246.357	229.513	240.247	269.639	686.587	615.318	927.706	1488.43	843.967	983.802	899.68	458.344	252.852	233.91	230.745
7311	0.85		0.5	12.0649	10.8973	12.0649	11.6757	12.0649	11.6757	11.7635	11.7635	11.3841	11.7635	11.3841	11.7635	11.7635	7.55144	1.51788	1.47993	8.0068	11.3841	6.86052	5.86463	0.863097	4.4704	6.63921	6.86052	6.86052	5.79824	6.86052	6.63921	6.86052	6.63921	23.279	23.279	22.5281	23.279	22.5281	23.279	23.279	21.0262	23.279	22.5281	23.279	22.5281	28.4542	28.4542	27.5363	28.4542
1755	0.85		0.5	82.9618	79.5524	88.0759	85.2348	64.3042	62.2298	64.3042	64.3042	62.2298	64.3042	62.2298	64.3042	58.7035	58.0812	64.3042	62.2298	52.4043	50.7138	52.4043	52.4043	50.7138	52.4043	50.7138	52.4043	52.4043	52.6989	100.382	108.28	153.475	148.524	153.475	153.475	148.524	153.475	148.524	153.475	153.475	138.623	153.475	148.524	52.2062	50.5221	52.2062	52.2062	50.5221	52.2062
1192	0.85		0.5	262.249	267.53	232.37	270.73	269.196	143.8	134.457	133.431	130.818	134.985	136.101	142.128	107.585	80.5828	102.303	78.6859	182.858	170.885	65.1475	48.1517	46.0836	62.81	53.8997	51.3246	57.4026	77.8964	65.6305	60.0433	74.0157	190.098	185.226	170.79	169.041	176.78	180.21	292.42	209.171	279.087	263.797	208.658	201.927	155.521	172.693	148.914	140.288	145.257
541	0.85		0.5	134.857	110.061	40.892	95.2698	134.857	130.507	131.742	131.742	127.492	131.742	127.492	131.742	131.742	103.694	32.2981	43.3474	66.7211	123.668	14.8816	15.3265	14.8321	15.3265	14.8321	15.3265	15.3265	13.8433	15.3265	14.8321	15.3265	14.8321	189.761	180.918	175.082	180.918	175.082	180.918	180.918	163.41	65.364	70.0329	144.151	175.082	92.1122	92.1122	89.1409	92.1122
1716	0.85		0.5	25.0214	26.4875	30.2993	29.3219	30.2993	22.2031	22.9432	22.9432	22.2031	22.9432	14.8761	16.2823	12.2857	20.7229	22.9432	22.2031	22.9432	26.3822	27.2616	27.2616	26.3822	27.2616	26.3822	27.2616	27.2616	24.6234	27.2616	26.3822	27.2616	45.2428	46.7509	46.7509	45.2428	46.7509	45.2428	46.7509	46.7509	42.2266	46.7509	45.2428	46.7509	66.7522	68.9773	68.9773	66.7522	68.9773
1883	0.85		0.5	65.5416	56.9452	62.8069	71.9961	55.9363	40.1963	42.2582	37.9254	25.6744	27.2771	36.0238	36.7509	36.5711	34.4739	40.3073	39.7234	53.4232	65.3857	49.1517	48.0004	45.3966	45.491	41.9069	42.6264	43.7389	40.4998	46.5536	47.626	52.3683	47.0298	40.5496	38.3954	35.1211	35.4688	34.1378	68.1528	49.1085	99.4618	58.7237	49.4835	62.6065	53.8266	49.3622	49.0572	45.8679	44.6647
895	0.85		0.5	1426.97	1056.72	1555.1	2106.47	2306.77	2154.06	2596.21	2694.45	2530.78	2650.52	2461.22	1213.81	1033.71	885.569	1697.27	2434.38	2474.81	2316.02	2533.38	2406.18	2458.25	2544.06	1376.14	1070.01	1110.04	902.38	1348.23	2096.08	2196.29	1952.09	2308.56	2384.08	2344.88	2589.08	2859.82	1978.96	1825.21	1495.29	1627.53	1200.29	1866.69	1573.69	2103.42	2645.37	2567.12	2669.77
1093	0.85		0.5	39.9477	38.0752	34.3301	46.8137	48.3742	35.7721	36.9645	36.9645	35.7721	36.9645	35.7721	32.6719	30.5255	25.8752	36.9645	35.7721	36.9645	46.6541	48.2092	48.2092	46.6541	48.2092	46.6541	48.2092	108.397	207.545	108.245	46.6541	279.487	207.577	96.7321	96.7321	93.6117	96.7321	93.6117	96.7321	96.7321	87.3709	96.7321	93.6117	117.172	92.6701	95.7591	95.7591	92.6701	95.7591
1709	0.85		0.5	144.826	132.98	203.384	210.06	156.319	94.4984	125.553	112.729	84.8488	91.6176	113.175	113.917	101.203	177.571	162.575	189.787	305.944	347.44	108.928	127.871	104.746	125.015	114.233	168.855	180.758	338.12	482.076	160.791	120.763	229.679	104.113	96.8423	84.1541	97.6695	126.22	148.06	102.134	127.691	174.119	235.037	215.256	117.254	129.46	86.2637	80.6816	104.238
1017	0.85		0.5	32.487	37.8085	55.5169	55.1716	52.4906	17.3838	16.6453	17.1587	16.7903	17.1168	16.9713	17.7563	17.3691	16.4085	17.9761	18.7286	28.52	42.9027	45.392	39.7769	37.4279	38.9727	42.1325	40.5519	43.5184	56.6689	45.0588	44.2161	42.058	82.3299	81.9697	91.7283	86.1705	84.5618	81.8617	223.725	95.5889	77.0677	83.1167	98.646	306.123	97.1721	97.9557	97.2288	94.1152	98.2772
[truncated: 434 more columns]

## Sheet: Storage(OBS inflow-With Demand)
grand_id	a1	a2	a3	1980-01	1980-02	1980-03	1980-04	1980-05	1980-06	1980-07	1980-08	1980-09	1980-10	1980-11	1980-12	1981-01	1981-02	1981-03	1981-04	1981-05	1981-06	1981-07	1981-08	1981-09	1981-10	1981-11	1981-12	1982-01	1982-02	1982-03	1982-04	1982-05	1982-06	1982-07	1982-08	1982-09	1982-10	1982-11	1982-12	1983-01	1983-02	1983-03	1983-04	1983-05	1983-06	1983-07	1983-08	1983-09	1983-10
753	0.85		0.5	20648.5	20402.7	20352	20390	20116.1	20536.6	21252.2	21252.9	21247.9	21435.4	21507	21058.5	20854.4	20704.6	20736.4	20235	19783.7	21483.4	22837.3	22735.5	22263.5	21953.9	21798.6	21597.3	21091.8	20933.1	21476.2	22639.3	23105.9	24546.4	26934.1	27554.3	27072	26940.2	26705.4	26199.5	25770.9	25534.8	25900	25532.9	24790.6	24983.4	26023	26071.7	25380.4	24764.7
870	0.85		0.5	17939.8	18211.6	18788.5	19006.1	18557.3	18253.8	18037.5	17938	17826.7	17788.9	18003.2	18215.9	18178.1	18557.3	19028	18771	18238.9	18208	18522.1	18945.4	18691.7	18279.8	17656.8	17359.9	17157.7	17733.8	18901	20510.7	21330.6	22853.5	23079.8	22779.3	22059.9	21519.3	21414.9	21486.5	20862.3	20581.1	21190.3	21353.1	20971.5	20086.2	19224	18719.6	18812.6	18404.8
597	0.85		0.5	13722.1	13318	13137.5	12815.5	14136.6	16642.9	17716.4	16922.1	16218.9	15502.5	14853.3	14253.4	13619.9	12925.8	12230.2	11418.2	10815.3	10668.9	10333.3	9884.58	9576.15	9507.59	9346.81	9082.15	8715.81	8513.79	8574.66	8616.35	9652.38	11450.3	12788.6	12842.8	12894.1	12986.3	13091.1	13144.9	13029.8	13002.3	13197.6	13514.3	14882.1	19126.4	23751.3	24775.1	24236.8	23638
307	0.85		0.5	13079.9	12911.2	12788.3	12755.2	12598.4	13139.2	13753.7	13579.3	13306.9	13101.1	13058.2	12909.8	12864.2	12801.4	12853.8	12780.9	12959.7	14917.7	15717.8	15435.7	14997.8	14667.8	14409.7	14180	13898.4	13865.2	14183.6	14430	14572.5	15894	17163.9	17103.1	16828.9	16636.3	16457.7	16295.3	16130.4	15998.8	15957.8	15775.5	15694	15806.9	15988.7	15912.7	15646.6	15389.2
1753	0.85		0.5	4146.91	4265.94	4441.56	4831.04	4824.95	4758.74	4644.01	4482.6	4342.8	4239.56	4154.6	4104.43	3985.64	3968.72	3917.25	3823.9	3707.17	3733.98	3679.56	3612.37	3562.6	3482.24	3408.65	3429.27	3700.35	4097.88	4356.74	4424.65	4336.12	4194.21	4078.88	4015.01	4041.83	3975.22	3917.79	4235.71	4523.97	4687.23	4764.17	4948.95	5184.39	5314.6	5198.4	5031.14	4852.45	4687.18
297	0.85		0.5	3462.73	2827.82	2247.72	1745.04	3139.95	4787.18	5392.14	5276.28	4990.95	4660.57	4262.09	3811.08	3503.73	3047.34	2613.92	2245.12	2909.28	5150.82	6818.85	7400.85	7029.71	6439.64	5766.48	5024.15	4192.18	3433.81	2794.91	2101.41	2070.96	3815.34	5431.42	5578.78	5457.42	5243.98	4900.68	4461.81	4028.36	3583.29	3188.8	2810.98	3161.48	4953.82	6013.51	6357.92	6055.43	5578.79
1036	0.85		0.5	1592.83	1498.87	1578.78	1750.45	1800.83	1874.53	2102.36	2132.43	2085.62	1937.32	1821.79	1695.96	1519.04	1412.92	1297.06	1162.01	1071.13	1057.24	1059.56	1095.32	1070.09	1021.31	1019.18	1002.17	1147.55	1891.73	2341.69	2640.7	2684.67	2807.85	2967.61	2902.03	2813.44	2603.98	2425.8	3584.52	4304.51	4371.48	4590.37	5072.12	5824.51	5810.54	5507.83	5139.09	4697.77	4053.2
989	0.85		0.5	629.253	676.808	768.85	1754.84	1836.28	1524.12	1239.42	1090.88	921.075	707.835	635.743	636.932	637.205	633.98	634.523	634.983	823.492	2071.88	4024.35	3868.73	3402.3	2934.07	3030.73	2854.17	2536.15	2895.16	3225.68	3268.46	3160.74	4846.86	5101.7	4657.09	4203.22	3413.01	2528.19	2562.78	2435.49	1981.57	1556.8	3369.51	5314.5	5583.4	5015.51	4108.95	3205.01	2381.44
1026	0.85		0.5	552.517	545.369	648.094	853.015	856.752	888.389	939.189	916.322	867.444	769.794	700.706	642.054	549.3	465.247	426.577	430.322	490.07	694.22	943.138	1136.44	1235.84	1276.94	1362.09	1379.39	1500.01	2056.51	2272.61	2489.1	2589.05	2691.71	2653.07	2484.25	2297.97	2023.38	1731.74	2314.69	2366.35	2280.27	2313.69	2496.05	2864.33	2772.84	2683.62	2489.83	2244.97	1948.34
1848	0.85		0.5	3018.94	3119.85	3364.28	3720.15	3692.82	3609.19	3503.88	3365.12	3225.8	3126.49	3066.07	3025.91	2921.95	2889.07	2855.53	2888.14	2842.08	2900.15	2859.97	2765.28	2706.4	2627.2	2557.76	2503.52	2569.55	2731.86	2797.56	2947.85	3040.22	3028.97	2954.05	2898.7	2857.81	2900.95	2865.88	3284.73	3719.48	3719.51	3718.16	3719.35	3717.47	3661.93	3549.95	3437.76	3303.64	3197.14
1869	0.85		0.5	1264.81	1306.31	1649.34	2436.45	2549.04	2421.83	2280.01	2079.72	1855.27	1720.42	1538.08	1368.76	1162.48	1054.58	922.256	803.377	695.281	716.059	704.754	663.822	632.333	595.182	558.858	517.901	615.219	752.354	830.808	1152.79	1347.49	1264.33	1196.88	1136.55	1095.28	1052.27	990.306	1579.75	2404.17	2836.43	3116.15	3321.2	3336.05	3203.86	3005.52	2785.45	2536.59	2282.68
7313	0.85		0.5	1091.4	832.809	642.156	462.839	606.954	1052.35	1323.99	1177.43	1117.64	1196.01	1316.1	1402.32	1458.65	1469.88	1509.02	1542.93	1872.44	2523.46	2421.2	2009.65	1590.85	1333.86	1194.5	1033.14	777.061	564.572	439.066	317.758	448.38	1044.81	1816.43	1793.04	1692.46	1789.41	1901.2	1977.04	1997.83	2014.6	2057.12	2118.09	2284.58	2527.55	2519.79	2295.96	2083.43	1993.9
1042	0.85		0.5	1735.79	1739.11	1791.22	1927.57	1983.63	2012.26	2000.38	1944.61	1888.19	1836.47	1794.09	1752.85	1704.13	1666.04	1634.33	1620.9	1627.49	1652.38	1643.04	1610.02	1570.05	1527	1502.14	1467.93	1444.52	1638.38	1723.57	1759.92	1799.9	1876.38	1912.44	1890.83	1854.35	1806.98	1776.54	2330.17	2445.99	2445.89	2445.76	2446	2445.99	2438.99	2420.03	2347.82	2268.41	2206.94
884	0.85		0.5	1459.2	1459.05	1447.91	1436.53	1422.31	1422.4	1408.55	1420.57	1422.13	1425.35	1433.07	1429.94	1417.68	1405.69	1392.69	1403.5	1411.54	1409.8	1407	1408.62	1406.5	1395.09	1385.2	1371.9	1367.99	1352.78	1340.54	1339.07	1337.29	1321.6	1310.73	1306.42	1319.63	1333.12	1339.67	1350.87	1364.85	1369.82	1372.07	1358.06	1333.93	1318.14	1293.71	1287.46	1300.47	1310.88
1144	0.85		0.5	1153.99	1192.06	1210.41	1218.79	1225.07	1222.81	1190.3	1142.57	1095.86	1110.64	1114.14	1127.85	1127.35	1121.58	1122.06	1112.57	1103.14	1144.22	1154.56	1136.68	1113.64	1119.28	1209.74	1235.88	1235.63	1306.89	1351.8	1359.52	1376.11	1503.5	1545.42	1529.58	1497.54	1470.05	1447.56	1555.25	1645.01	1665.02	1716.43	1726.6	1737.11	1742.72	1726.5	1679.76	1626.9	1578.39
1006	0.85		0.5	584.202	586.501	634.111	764.199	788.423	776.154	747.771	707.147	671.202	641.769	620.457	594.33	562.624	536.228	514.785	492.653	497.334	591.736	743.332	762.704	753.429	751.773	818.973	843.669	880.334	1008.73	1078.52	1116.95	1153.81	1254.43	1258.71	1233.11	1242.08	1205.62	1167.64	1350.01	1418.58	1417.34	1395.57	1546.04	1810.33	1845.38	1822.81	1744.95	1660.7	1642.25
1048	0.85		0.5	475.814	446.958	428.29	524.943	718.842	860.617	909.115	829.845	757.967	679.597	605.541	531.675	460.136	394.041	325.274	252.799	203.758	210.55	226.427	256.802	268.447	284.796	396.532	452.86	459.522	503.956	585.899	633.496	825.2	1346.1	1578.28	1532.8	1399.83	1262.68	1130.82	1010.8	891.345	806.912	739.096	872.553	971.404	1059.76	1119.08	1051.86	959.018	906.075
1032	0.85		0.5	190.439	195.405	215.001	516.344	551.698	478.053	383.01	302.134	238.702	191.448	188.324	188.412	184.019	182.885	189.221	191.556	196.071	208.5	249.213	232.058	225.668	211.436	283.025	295.241	289.476	378.527	481.162	539.764	625.673	1185.96	1431.63	1208.63	975.299	725.234	483.065	299.124	201.522	273.825	223.436	604.839	983.093	949.44	832.03	670.346	510.949	404.794
355	0.85	0.5	0.5	801.892	609.488	450.346	293.983	178.412	211.639	436.794	566.076	738.125	910.922	1054.68	1182.99	1301.26	1395.79	1503.41	1581.47	1686.13	1760.6	1669.38	1402.62	1151.57	973.582	823.991	669.205	480.219	304.931	196.435	170.007	169.872	221.078	539.504	788.778	908.068	1194.24	1429.39	1624.05	1754.97	1760.6	1760.6	1760.6	1760.6	1760.6	1756.38	1662.8	1532.25	1468.99
1101	0.85		0.5	982.258	966.781	988.365	1558.63	1651.06	1623.05	1530.87	1409.91	1278.2	1166.91	1071.36	1049.84	934.115	865.289	809.38	798.563	710.49	782.264	859.572	850.573	850.112	820.548	799.437	766.171	770.918	909.322	1021.51	1123.75	1219.87	1182.74	1129.26	1070.98	1063.49	992.702	923.846	1091.02	1530.99	1639.42	1688.4	1684.47	1701.74	1671.77	1591.61	1462.27	1317.03	1175.9
1023	0.85		0.5	338.263	316.918	356.648	875.424	1013.87	982.138	889.859	791.579	702.165	589.8	479.041	378.971	271.561	179.692	161.333	161.196	176.464	213.124	301.448	371.749	403.051	446.745	770.309	913.6	942.539	1043.78	1259.1	1382.83	1533.71	1637	1616.63	1486.07	1296.85	1096.3	894.525	703.499	521.399	383.47	335.951	971.96	1145.92	1290.08	1564.63	1467.18	1302.69	1150.25
1864	0.85		0.5	377.761	388.66	505.658	787.677	826.971	775.921	715.942	636.775	551.997	499.807	447.712	401.67	328.925	303.616	267.667	244.14	218.857	248.114	254.852	250.966	251.082	252.612	262.2	264.396	319.602	386.481	426.57	519.182	591.275	568.034	526.794	511.144	571.626	614.492	608.948	860.943	1183.14	1310.89	1428.64	1489.78	1487.01	1409.43	1298.12	1156.58	1049.62	931.851
1021	0.85		0.5	171.613	169.117	164.919	196.361	242.655	276.413	314.603	284.932	257.145	230.481	204.215	184.841	163.185	142.04	125.798	121.634	147.219	181.637	176.729	172.685	198.06	206.846	297.36	314.255	308.023	313.576	330.365	330.968	396.891	609.705	692.851	693.262	636.607	581.444	530.392	487.601	442.015	406.758	390.454	436.775	434.392	481.881	523.311	470.682	430.705	400.669
1120	0.85		0.5	320.402	315.4	309.737	303.932	299.239	303.589	292.989	282.439	274.859	270.536	264.576	260.492	253.914	247.665	246.195	243.119	243.283	263.32	258.409	255.949	255.856	263.62	271.294	266.429	261.122	261.954	263.711	264.315	327.326	439.041	485.448	482.095	470.593	459.736	448.995	442.283	436.471	435.688	435.279	430.559	439.387	451.534	445.093	430.54	417.129	478.578
182	0.85	0.5	0.5	903.153	1102.7	1102.7	1102.7	1102.7	1099.12	1059.58	966.875	869.696	780.145	668.824	604.169	524.01	482.834	459.959	497.027	505.577	461.734	310.446	223.183	192.22	164.632	251.293	691.304	1102.7	1102.7	1102.7	1102.7	1102.7	1102.7	1084.98	1004.91	941.865	879.497	906.058	1085.54	1102.7	1102.7	1102.7	1102.7	1102.7	1102.7	1101.02	1088.58	1038.86	979.302
7311	0.85		0.5	122.919	117.457	130.074	207.854	215.341	209.326	195.031	180.197	166.214	153.165	141.138	129.958	117.982	107.167	104.314	104.377	107.445	120.682	114.174	106.996	104.451	105.174	113.263	111.987	107.101	107.416	121.37	128.205	146.65	300.921	391.543	371.355	348.234	324.337	301.752	283.672	279.389	306.096	313.118	436.485	487.821	495.659	477.702	446.224	416.52	393.153
1755	0.85		0.5	139.876	176.758	305.029	421.352	416.157	401.729	371.185	329.485	282.23	230.955	178.806	137.714	105.078	238.349	304.652	326.436	341.741	518.09	542.764	519.985	491.751	457.439	426.763	481.226	691.389	914.39	1005.39	1005.37	963.921	866.347	746.683	618.636	598.794	474.654	342.336	310.9	317.58	328.389	273.889	255.807	584.545	867.282	851.816	805.073	756.277	714.836
1192	0.85		0.5	128.615	315.887	391.774	501.423	668.207	686.81	602.178	498.665	399.549	314.281	234.492	170.778	103.447	90.9227	90.8948	90.7398	111.207	390.149	552.907	556.315	559.276	580.837	623.287	645.397	666.439	742.211	810.095	853.289	899.617	897.106	822.988	695.724	563.161	451.322	351.309	422.778	517.731	625.421	775.193	845.742	786.494	743.612	706.014	628.843	524.098	421.505
541	0.85		0.5	216.946	123.668	89.9749	95.2903	210.431	509.184	701.322	653.784	576.922	499.272	408.893	316.365	216.257	119.304	90.02	90.0165	90.0341	102.403	116.878	161.05	187.652	209.593	228.214	245.723	264.951	279.97	297.991	342.979	486.641	755.182	910.266	851.064	786.967	704.025	583.118	447.247	300.009	162.24	89.6334	89.1598	94.9188	301.486	561.68	658.462	661.836	628.668
1716	0.85		0.5	80.0543	85.5821	121.4	157.067	149.062	138.16	128.328	113.726	98.8574	84.4998	75.5214	74.9183	74.6178	98.1471	104.503	97.6778	118.543	175.042	166.047	153.11	137.806	119.485	103.956	89.6461	122.857	229.092	296.989	305.858	295.223	279.647	245.283	204.132	168.306	133.383	96.3093	207.611	270.276	282.025	272.482	294.382	418.652	427.071	373.584	309.306	248.116	217.5
1883	0.85		0.5	118.317	124.133	122.461	135.217	146.473	160.139	165.867	167.401	156.885	148.695	146.69	150.428	150.997	158.682	167.484	172.484	178.497	200.182	200.01	202.942	201.155	197.423	195.072	193.123	200.665	204.342	204.442	204.834	205.776	200.175	182.207	163.922	139.5	117.16	94.3796	84.6835	108.694	144.783	177.981	182.446	184.691	199.419	198.504	194.986	194.446	189.34
895	0.85		0.5	448.632	446.831	443.636	442.637	437.851	432.4	422.882	416.592	416.586	415.885	418.223	417.592	414.868	412.628	409.342	408.747	406.667	403.75	399.8	396.382	394.229	394.25	394.873	396.072	395.926	395.146	392.331	392.084	392.293	394.803	390.147	382.917	379.594	384.609	389.584	393.646	397.079	397.39	398.003	401.598	400.678	397.8	394.388	387.849	382.77	382.719
1093	0.85		0.5	55.7484	60.2729	54.2321	79.4929	159.96	200.256	181.698	142.902	105.651	80.1576	66.9241	75.7642	60.4457	60.8843	113.204	119.618	191.434	432.825	476.268	449.727	414.884	434.354	508.546	493.074	465.548	527.3	526.458	509.539	512.418	518.949	449.438	358.048	263.959	170.468	82.7826	222.59	247.069	218.848	239.136	225.915	415.477	499.199	449.489	361.033	266.638	172.783
1709	0.85		0.5	267.095	280.734	371.407	490.616	502.345	482.433	455.106	429.719	390.399	327.271	277.229	277.826	236.042	247.059	348.972	431.1	502.669	509.836	487.529	461.485	436.528	386.41	377.263	382.331	452.964	509.685	509.9	509.19	482.651	501.034	482.356	443.443	387.299	334.742	303.491	349.863	343.237	343.266	390.281	479.189	509.535	502.133	474.459	452.813	377.443	310.334
1017	0.85		0.5	50.0483	55.5233	66.1365	92.4646	87.5624	84.3365	81.9356	78.7504	77.3129	76.2071	76.6984	79.9883	80.9956	83.6607	90.422	99.1618	143.215	201.561	219.07	239.148	218.993	196.544	204.794	200.509	198.595	312.178	373.148	398.883	422.902	404.202	355.221	307.515	339.788	316.213	266.335	461.243	503.254	478.102	433.305	442.51	508.829	479.81	410.272	329.681	247.436	170.535
[truncated: 434 more columns]
