# Supplementary material for: The value of observed reservoir storage anomalies for improving the simulation of reservoir dynamics in large-scale hydrological models
Source: Copernicus journal article supplement (doi:10.5194/hess-29-4073-2025), 2025-09-03
Supplement: Supplementary file 7 [file SA_results_calibrated_against_estimated_storage.xlsx]

## Sheet: Readme
	Sheet name	Note	Inflow source	Total number of reservoirs	Number of reservoirs where downstream demand is taken into account
	Outflow(WG inflow-No Demand)	Simulated outflow (×106 m3/month) where downstream demand is not considered for irrigation and supply reservoirs.	WaterGAP	100	0
	Storage(WG inflow-No Demand)	Simulated storage (×106 m3) where downstream demand is not considered for irrigation and supply reservoirs.	WaterGAP	100	0
	Outflow(WG inflow-With Demand)	Simulated outflow (×106 m3/month) where downstream demand is considered for irrigation and supply reservoirs.	WaterGAP	21	21
	Storage(WG inflow-With Demand)	Simulated storage (×106 m3) where downstream demand is considered for irrigation and supply reservoirs.	WaterGAP	21	21
	Outflow(OBS inflow-No Demand)	Simulated outflow (×106 m3/month) where downstream demand is not considered for irrigation reservoirs.	Observed	35	0
	Storage(OBS inflow-No Demand)	Simulated storage (×106 m3) where downstream demand is not considered for irrigation reservoirs.	Observed	35	0

## Sheet: Outflow(WG inflow-No Demand)
grand_id	p1	p2	p3	1980-01	1980-02	1980-03	1980-04	1980-05	1980-06	1980-07	1980-08	1980-09	1980-10	1980-11	1980-12	1981-01	1981-02	1981-03	1981-04	1981-05	1981-06	1981-07	1981-08	1981-09	1981-10	1981-11	1981-12	1982-01	1982-02	1982-03	1982-04	1982-05	1982-06	1982-07	1982-08	1982-09	1982-10	1982-11	1982-12	1983-01	1983-02	1983-03	1983-04	1983-05	1983-06	1983-07	1983-08	1983-09	1983-10
610	0.4	0.5	0.1	2204.19	4583.12	3663.81	2124	3935.16	4905.99	2053.4	1500.43	1484.12	1556.25	1510.86	1555.91	1541.14	1378.83	1864.78	1614.93	1428.72	1316.6	1171.78	1128.47	1118.39	1153.72	1112.58	1147.02	1169.95	1177.76	1142.85	1028.76	1120.14	1107.92	1131.84	1135.56	1099.46	1134.44	1094.21	1252.68	1118.71	1081.69	1227.01	1628.41	1125.08	1094.29	1231.51	1202.18	1109.88	1405.43
753	0.6	0.5	0.4	1536.98	1547.77	1758.75	1826.2	1744.02	1618.93	1526.24	1636.88	1734.11	1777.41	1381.86	1471.58	1413.2	1258.25	1481.83	1409.54	1864.48	1671.14	1495.66	1594.02	1661.4	1487.8	1344.14	1403.03	1446.97	1230.4	1601.19	1976.75	1687.2	1739.8	1665.19	1725.83	1808.74	1966.78	1820.31	1881.62	1964.7	1609.47	1995.59	1854.21	2050.93	1873.8	1690.99	1854.33	1898.97	2014.93
870	0.9	0.5	0.4	2298.49	2094.16	2275.46	2238.21	2145.86	2011.91	1807.17	1878.17	1742.84	2039.49	1996.98	2034.86	2092.72	1877.19	2122.43	1828.14	1983.8	1787.16	1734.43	1757.06	1724.45	1775	1711.58	1765.27	1760.27	1586.14	1988.92	2653.61	3025.81	2988.09	3171.91	2423.83	2090.2	2495.25	2362.52	2392.83	2351.95	2039.62	2605.85	2706.12	2675.08	2280.49	2092.35	2171.39	2198.41	2309.78
597	0.4	0.6	0.4	1153.88	1141.65	2638.3	3599.92	6398.19	3648.5	951.502	962.428	1090.8	1098.34	989.331	994.453	970.003	842.047	980.852	1190.96	1048.46	826.09	719.806	758.404	979.711	1271.39	1042.72	1268.51	1290.17	1253.66	1649.62	1274.43	1498.92	900.234	659.106	1032.94	1451.4	1430.8	1261.87	1306.4	1224.75	1243.36	1574.46	1187.27	1221.81	911.036	798.991	933.756	1001.05	1071.54
307	0.2	0.4	0.1	256.607	266.789	302.992	317.215	248.865	308.087	220.424	277.413	294.052	291.866	274.435	279.121	280.078	264.777	291.885	300.769	525.031	1240.66	275.705	277.901	300.108	305.449	291.279	292.976	294.279	290.356	1138.14	2373.57	1640.97	3068.51	772.382	274.433	289.275	507.972	546.012	625.638	672.414	514.204	654.125	692.952	615.255	354.771	267.697	263.617	317.102	315.069
1753	1.5	0.1	0.1	9472.76	8512.38	17281.3	12849.5	6585.84	3392.64	2289.69	1968.04	1961.27	1754.47	2084.37	2152.59	2249.79	7692.4	5649.1	5371.47	2685.61	2892.23	1774.43	1190.43	800.785	841.297	838.466	2289.7	12362.1	11968.7	9519.82	5890.43	3475.68	2655.01	1971.28	2031.99	1637.54	1575.97	1644.99	12943.9	8753.07	9747.19	7769.02	11588.9	11969.6	4648.68	2554.37	1943.07	1947.25	1221.77
297	4	0.6	0.3	465.881	649.64	629.961	936.994	1268.5	1802.11	818.559	951.81	765.467	734.636	801.203	910.029	734.479	736.709	642.6	963.819	997.804	2465.74	1963.57	708.854	809.522	812.337	695.435	744.443	631.956	640.3	310.553	558.298	1006.87	1105.45	853.663	856.03	892.219	741.428	630.799	827.834	744.294	703.479	717.86	862.848	764.439	749.017	918.136	759.308	690.923	813.154
1036	6	0.9	0.4	387.794	317.927	327.292	380.602	428.14	257.403	316.329	316.467	303.118	310.986	313.291	306.21	309.35	293.497	288.246	283.023	321.019	278.377	267.694	289.039	273.882	318.021	273.418	316.844	400.555	264.461	217.192	276.561	292.851	401.395	297.76	318.092	298.767	319.518	461.56	908.573	670.822	662.297	761.789	835.865	688.707	592.732	440.605	416.228	393.763	447.873
989	1.5	1	0.3	374.766	506.417	869.788	1099.7	583.234	384.493	339.252	363.706	336.459	354.966	356.194	415.022	315.201	408.496	311.917	313.275	539.686	1124.63	936.855	1207.29	433.406	416.917	1047.53	801.252	841.228	1379.99	1022.55	611.82	880.15	1288.8	776.581	660.947	553.884	402.962	425.874	1378.89	683.701	819.546	814.387	1885.27	1345.1	1160.87	1249.05	692.569	350.395	773.764
1135	9	1.5	0.2	129.692	175.069	133.755	140.213	242.648	200.355	118.44	139.634	260.933	218.325	215.281	459.05	156.822	144.476	452.914	213.162	346.564	283.426	185.306	146.25	140.903	1671.77	739.643	489.073	458.151	498.521	479.565	302.251	1519.23	981.001	1008.44	723.331	346.563	266.64	267.092	274.364	334.176	818.733	623.915	554.876	560.645	406.649	242.988	199.029	139.018	1406.57
1269	0.8	0.1	0.1	768.788	630.402	669.515	858.973	708.932	571.166	649.153	155.295	99.306	184.056	143.711	147.613	146.684	171.513	207.779	120.232	195.963	504.981	192.058	98.4566	140.926	124.834	173.854	164.017	203.394	377.548	265.548	602.839	392.516	229.285	138.964	120.851	100.111	146.334	342.825	1087.1	581.827	932.825	700.791	713.801	921.361	652.668	705.58	691.514	536.76	122.088
1077	5	0.3	0.1	275.008	273.849	208.498	241.43	377.687	291.658	229.052	240.357	230.574	240.589	232.952	268.86	215.216	229.846	277.829	193.368	241.204	250.424	180.914	230.918	92.8639	351.424	223.358	210.479	287.165	808.526	455.841	348.143	1378.52	1271.99	434.923	366.462	238.149	244.824	246.16	329.837	397.407	948.081	715.865	653.849	826.724	555.413	228.778	244.017	234.049	1612.62
1026	0.4	0.2	0.1	141.652	272.674	299.108	224.503	257.964	297.883	189.984	130.287	126.452	135.006	158.19	142.174	145.123	166.925	230.313	147.847	304.522	270.023	222.123	305.494	113.967	238.421	258.313	300.035	404.936	258.515	227.862	268.978	284.763	326.903	250.623	354.124	212.527	172.887	260.91	501.331	297.453	305.193	309.685	504.815	629.404	262.981	301.298	296.996	284.171	384.322
740	9	4	0.9	14.0717	9.9557	10.7091	9.75494	9.15767	8.65848	9.08894	9.83919	11.0849	11.041	10.9099	11.0698	10.7338	9.59891	10.3446	9.9275	9.78971	10.5199	10.4953	9.89507	10.3001	12.0018	10.8549	21.5155	48.7044	31.64	12.0674	12.7137	10.4476	10.0873	10.4035	10.1784	10.2052	50.0513	49.9997	22.52	15.916	10.9877	27.3555	10.0101	9.64574	9.70815	10.0449	9.83913	11.1742	37.8865
1294	1.5	0.1	0.1	22.6395	27.7753	29.1686	29.6612	124.918	22.5381	27.6196	18.97	54.7671	29.8544	37.5548	78.3247	87.7532	91.4645	272.073	188.829	174.293	509.883	246.672	174.077	147.102	209.975	184.042	160.456	151.188	150.663	147.261	86.2311	98.9834	75.7955	69.394	55.7505	54.87	69.7874	57.0125	61.2533	94.2386	188.953	225.21	92.518	99.7396	90.4791	66.4775	54.748	54.1351	55.8702
1848	1.5	0.8	0.2	229.92	124.372	283.735	113.989	126.95	153.878	154.724	154.718	146.864	55.916	206.455	90.6378	84.6145	175.955	194.5	102.387	41.6244	73.4374	37.59	35.0307	36.137	39.4077	39.9838	75.5878	154.909	137.255	132.546	208.475	111.398	146.691	146.994	53.5345	36.2235	43.5008	136.429	246.084	124.312	176.458	156.941	338.853	336.798	184.514	172.137	168.617	167.416	178.908
1869	1.5	1.5	0.2	380.54	377.052	922.157	430.414	430.057	489.113	455.06	57.6094	57.4303	71.1175	73.0968	76.1029	71.0302	88.0793	216.554	120.535	68.346	56.53	56.9029	54.8265	58.6997	61.5465	60.6506	66.1466	172.958	145.35	164.338	654.544	288.431	63.7291	56.9106	61.7884	58.7703	64.6983	68.5166	1058.23	451.862	601.008	593.441	760.754	798.893	440.55	554.287	476.524	346.389	64.324
1863	0.6	0.5	0.1	186.872	84.284	387.028	112.953	137.753	109.659	111.562	114.992	124.142	138.084	115.677	105.36	109.877	166.324	92.4529	101.092	106.6	103.686	100.151	92.8214	77.8328	82.9892	72.2309	193.699	109.395	104.923	82.8179	143.857	80.6051	101.728	104.411	102.606	86.478	95.1816	143.989	114.648	86.7002	128.069	131.169	94.9771	108.336	101.852	108.057	106.755	105.989	104.83
1770	0.4	0.7	0.1	161.431	83.1353	218.61	137.923	84.8416	81.4699	87.5917	86.7114	82.1763	83.5325	86.9115	104.44	105.063	128.822	66.0217	96.7447	71.8528	103.274	72.1652	82.4093	79.503	84.2807	93.322	139.434	103.362	77.6883	176.012	85.0521	85.2964	84.62	86.8084	86.1981	83.8093	83.1325	133.371	139.743	79.0691	91.8834	77.6826	118.121	187.883	74.0403	85.669	87.2349	82.9849	86.7821
965	8	2	0.5	116.677	55.3534	101.878	246.403	235.201	83.2687	43.4562	72.8296	60.0714	74.4075	64.3087	75.126	54.6016	69.5542	76.8255	51.9828	99.1115	23.1056	67.4121	107.448	48.5013	47.9477	64.4865	76.4648	73.9491	93.2314	65.3735	40.4538	135.169	200.361	168.287	75.7203	63.9105	65.3559	63.6649	69.764	87.1926	81.5923	303.613	253.173	259.703	314.888	167.838	55.4657	62.8552	72.1913
1247	1.5	0.4	1	70.6406	92.7425	80.9131	85.2233	113.88	67.9259	73.5317	81.3071	160.211	78.7809	127.633	306.733	102.651	78.2473	191.356	109.04	90.545	90.4833	94.244	89.841	86.9529	503.333	246.776	358.456	292.699	178.874	161.162	121.38	430.984	321.168	273.756	132.409	108.634	96.7414	86.8958	103.613	104.46	140.724	144.561	122.981	104.307	101.354	82.7877	88.2972	85.55	89.2726
7313	0.3	0.1	0.1	242.301	233.488	342.772	767.273	875.615	1171.63	227.616	201.14	330.332	241.892	234.857	246.053	238.715	263.985	451.087	585.669	1404.85	909.39	207.909	189.317	243.06	332.242	224.902	244.808	219.306	283.64	931.69	1685.18	1576.1	1109.29	303.636	212.248	280.765	273.752	239.713	365.677	514.659	445.596	1111.84	910.642	790.538	566.864	277.777	222.999	249.463	287.603
1287	7	0.3	0.4	408.069	757.84	539.262	325.539	594.261	299.605	318.544	319.289	305.816	403.197	275.126	369.442	280.305	291.605	349.255	286.768	339.332	1239.92	623.677	311.792	318.979	1310.73	886.247	578.335	527.565	682.57	558.556	336.407	1381.7	699.958	541.06	556.56	312.68	331.418	349.022	1183.6	724.714	1237.8	1011.24	700.078	793.669	479.731	321.965	550.352	300.791	321.609
1186	3	0.2	0.1	224.606	132.294	146.382	130.235	99.348	26.9558	29.129	29.205	29.0726	32.7588	31.4435	32.3582	31.2111	29.0095	33.7959	30.4149	42.2249	37.0784	41.1262	30.037	29.7362	33.0273	34.1148	31.4691	34.0814	163.946	27.3197	29.5811	31.671	29.0202	28.6506	29.1397	28.1161	31.7132	33.2984	284.083	21.4656	237.812	221.883	22.7387	32.2911	29.3618	29.247	29.0168	28.6415	31.2675
1042	6	0.9	0.3	41.7371	27.8302	27.4683	17.274	19.7066	21.0606	21.6628	21.6097	20.7907	21.4636	25.6687	20.9638	29.2959	28.5736	23.3761	20.0858	28.5517	20.0547	17.8256	20.8089	20.0005	30.7538	24.0486	20.441	44.1553	19.2131	13.873	21.0798	25.1733	26.7803	18.5169	22.5148	21.0777	22.0918	43.8242	91.654	51.1724	63.3301	81.4049	113.059	62.7974	61.4023	70.3087	69.6122	55.8954	54.8223
884	6	0.1	0.3	2526.18	2331.67	3066.41	2367.4	3048.48	2370.67	3045.04	2204.79	2355.93	1685.84	2364.55	2372.55	1689.11	2344.56	1689.23	2355.81	2373.83	1675.8	2361.33	1632.37	2347.83	1676.19	1667.52	2351.88	1676.84	1649.05	2406.11	1701.98	1695.55	2354.32	1687.82	2460.03	1677.36	2378.75	2353.58	2370.1	2380.65	1666.48	2370.06	2371.29	2366.47	2364.28	1693.23	2434.86	2358.3	2367.05
1273	10	0.1	9	10.0491	9.51327	9.30574	8.95012	90.4602	6.38096	5.55775	3.9617	49.9769	11.6645	13.987	13.9886	9.12856	8.8576	13.0569	34.766	9.2353	72.0853	7.74099	8.76356	8.5567	149.524	7.29859	10.0248	10.9889	93.434	64.5857	42.7291	268.286	7.75011	9.08411	9.10143	38.7954	9.40429	9.25776	10.7262	72.238	10.0139	65.0015	37.5055	39.3541	8.9685	8.95103	8.9075	9.00824	9.87805
961	0.1	1	0.1	0	0	0	0	0	0	0	0	0	0	0	0	0	0	0	0	0	0	0	0	0	0	0	0	0	0	0	0	0	0	0	0	0	0	0	0	0.424193	0.389444	0.521097	3.03791	4.25944	3.6892	4.0194	4.20256	4.26569	5.19071
1144	2	0.2	0.1	1286.12	1637.79	1089.49	1035.52	1258.11	912.344	484.609	515.638	523.022	1224.46	801.638	1323.56	929.892	739.588	1067.74	819.607	931.821	1846.61	1034.89	670.69	664.803	2092	1830.67	1302.17	954.579	2473.75	1492.63	965.969	2351.43	2991.89	1609.59	1122.81	825.781	863.499	924.71	4026.73	1685.92	2086.06	1669.57	1450.2	1701.24	1190.96	1014.7	979.973	675.014	709.136
616	10	0.3	0.1	1345.6	4613.52	3662.98	1825.65	3539.65	4410.35	2201.26	1978.87	1325.27	2047.82	1320.28	2046.9	1343.09	1966.34	1336.36	2031.04	1332.7	2039.01	1330.97	1316.52	2017.29	1318.05	1309.02	2009.5	1323.02	1964.21	1311.21	1318.43	2039.6	1291.84	1320.81	1257.42	1298.34	1320.33	1304.08	1322.31	1320.27	1258.74	1325.04	1303.55	1325.82	1308.88	1343.1	607.911	1301.35	1322.81
911	0.3	0.4	10	581.951	472.399	625.404	591.203	468.137	406.869	260.787	211.26	204.899	177.519	153.465	163.678	145.301	180.264	163.813	168.005	131.884	122.403	154.901	123.079	109.042	98.9894	118.795	181.056	126.755	692.77	1071.23	1030.59	1218.25	729.457	781.92	553.808	427.258	433.756	625.534	1061.56	577.726	1521	2017.39	2338.37	1399.29	1133.2	933.46	581.098	582.825	527.652
1006	0.9	1.5	0.3	32.8865	33.9269	28.959	18.2658	22.2487	22.7603	23.2728	23.2714	22.2116	28.5574	23.6315	25.7896	28.3106	33.5732	19.8257	22.1888	35.6299	31.2962	17.0965	23.9523	22.6859	83.8098	39.5446	61.4086	113.182	78.9304	55.5634	32.6325	27.4177	61.8192	20.75	92.2863	13.1174	23.4133	39.8441	157.21	38.9262	42.6955	26.8698	152.313	94.3604	63.3132	27.7607	23.6978	22.9845	120.054
1048	9	0.8	0.3	393.859	782.803	808.702	1225.92	1532.02	1073.72	756.961	783.457	488.264	371.498	348.706	361.523	328.81	290.212	336.942	283.706	274.496	283.717	245.522	270.531	249.575	259.264	358.135	241.8	291.62	753.5	611.589	382.954	1017.83	1078.12	720.264	769.368	481.107	345.477	297.63	347.069	317.292	507.439	785.162	818.252	918.828	819.275	788.568	775.636	522.988	694.513
1123	10	0.2	0.1	27.8298	18.3679	18.3124	19.4195	22.7295	16.7453	19.2877	19.3435	576.078	11.2429	13.5884	17.7545	19.8216	19.4341	16.9058	15.4919	24.3205	19.884	15.8959	17.9086	17.4747	20.451	23.2572	14.8693	34.1908	15.3216	16.4798	19.593	316.487	13.9515	17.0539	18.9292	18.3224	18.92	21.9787	439.16	12.9457	22.2225	20.8934	16.181	27.5483	37.5097	20.1192	19.2336	18.8583	19.573
1032	9	0.8	0.2	120.185	204.193	369.028	283.785	270.966	127.614	86.9697	82.7173	79.8445	82.9732	78.984	83.4957	79.9577	81.0758	91.2712	73.4954	106.331	82.2054	66.8656	79.0553	74.1535	86.9543	125.129	102.21	240.889	253.863	188.297	121.938	448.31	332.224	310.782	342.308	140.702	105.793	97.4154	240.602	218.586	355.348	352.8	405.691	404.745	320.169	340.872	266.411	111.809	291.438
1774	0.5	0.1	0.1	423.843	305.214	1010.14	489.054	324.025	265.959	288.64	277.064	258.667	238.054	102.784	104.489	101.938	297.697	258.532	276.845	260.552	277.912	246.447	253.544	133.638	89.1911	68.1527	118.197	368.227	714.135	850.423	312.123	278.458	287.394	271.846	273.444	281.932	195.717	244.369	331.894	279.232	585.582	531.642	637.689	523.057	274.9	284.802	281.398	261.408	264.275
1781	9	0.3	0.2	358.057	809.384	1671.13	925.701	592.358	180.745	210.931	203.663	195.031	197.271	148.809	145.172	153.416	330.584	664.24	558.053	214.732	475.05	186.442	193.03	185.549	127.604	116.352	187.478	324.8	1448.54	1172.52	545.582	380.162	211.351	215.576	235.123	182.668	212.521	295.05	563.962	658.989	1501.48	1464.17	1388.66	645.335	185.448	215.687	217.042	206.735	211.432
355	0.1	0.2	0.1	156.851	131.712	191.812	601.144	727.397	197.313	31.5374	42.624	39.0822	66.0027	62.9195	46.8922	157.411	170.486	247.067	512.332	1131.98	235.274	35.8465	40.867	41.1069	41.2961	67.0368	53.3278	43.3715	72.9487	212.622	394.175	603.752	337.552	33.89	41.9178	40.4778	61.1246	65.139	160.595	283.709	305.951	364.167	850.019	1499.91	529.42	53.7856	43.6809	60.5344	102.688
1101	10	0.8	0.2	171.776	114.699	256.749	158.382	138.998	138.336	135.816	131.323	104.056	38.7738	116.941	63.5115	79.4816	156.909	146.37	107.825	60.985	67.2424	42.168	30.2893	31.4493	34.421	34.4093	43.9592	66.7786	133.021	113.095	172.413	117.301	119.107	33.2476	33.659	30.9286	37.5559	51.9103	457.762	309.959	132.757	157.704	377.255	396.762	104.134	137.42	131.729	130.278	55.2111
1023	0.3	0.2	3	301.677	515.038	736.319	1086.8	1009	800.237	306.183	257.187	219.987	205.437	182.657	185.922	173.851	154.267	170.481	158.073	184.232	178.55	139.644	133.895	106.473	117.182	186.642	120.558	128.874	150.11	113.071	111.582	136.998	140.021	113.006	119.345	109.105	107.285	105.597	92.4126	91.3608	94.6431	110.397	470.811	413.814	323.339	256.936	230.859	193.717	190.24
1060	0.5	4	0.3	33.1199	40.7347	44.875	19.0038	32.7903	30.4011	30.2969	30.4222	29.8358	31.2666	37.3082	48.9917	31.0085	45.9167	31.334	28.2317	44.5249	28.4886	27.5545	40.2616	26.1318	52.9299	35.5858	37.2835	247.704	23.6063	24.5453	29.9497	35.1951	52.9806	24.6235	33.3537	31.164	32.4941	71.016	260.12	96.0883	57.7215	32.0715	216.248	36.0378	25.5671	32.3567	34.1469	32.3089	37.7468
1864	1	1.5	0.2	254.733	172.022	486.998	237.462	270.331	261.1	33.5836	33.5202	36.2892	51.8134	56.8441	43.7744	54.0591	124.583	133.383	81.1385	56.387	35.888	34.4459	33.638	34.616	36.8198	36.2763	50.4523	86.7859	113.097	125.989	319.241	101.576	47.1794	34.5396	55.2488	53.8937	93.949	167.891	489.455	192.333	265.772	249.212	447.692	464.989	198.278	237.152	245.035	302.74	106.772
1797	2	0.1	0.4	3557.35	2814.54	5409.25	2956.21	1784.16	1284.44	1008.99	1013.75	1016.2	844.221	860.743	1060.03	1109.22	2857.73	2036.26	2311.47	1182.1	1115.5	730.424	454.289	456.774	282.408	470.389	834.123	3142.98	4163.67	3353.95	1468.41	1200.83	1216.75	1007.87	1047.19	1015.46	1025.12	1458.22	3275	2427.38	3496	3005.76	3507.41	2399.31	1335.5	1156.63	829.102	824.683	843.191
305	0.5	0.7	1	1704.77	1361.79	1782.96	2088.05	2498.05	3314.24	2057.07	1502.81	2069.74	1623.52	1793.82	2287.65	1780.56	2234.12	1721.63	2173.77	2552.31	2240.89	1662.28	1561.87	1577.32	1565.34	1626.95	2052.08	1495.03	2603.45	2035.56	2944.68	2919.46	2697.64	2105.2	1450.89	2028.93	1910.26	1778.99	1953.74	2203.78	1978.98	2031.48	1893.41	1954.29	1768.45	2069.3	1406.64	1386.34	1361.29
968	10	8	0.1	58.4985	28.1733	291.827	372.342	233.559	111.286	64.7211	53.7023	53.4131	76.8335	52.348	75.0494	52.8527	52.1888	53.6586	74.6127	172.712	25.696	50.9178	56.8959	52.352	54.2654	52.5968	53.4068	78.4207	54.2784	73.1432	67.887	129.654	108.417	59.3412	49.0367	29.6986	51.9543	29.6716	30.3372	32.4857	58.6634	120.728	122.953	87.2177	165.736	52.5355	72.1125	54.7179	55.2551
1019	0.8	1	0.3	20.7512	18.2449	21.5495	24.4777	18.5893	10.5667	10.915	11.1357	11.0357	11.7129	11.5961	12.3084	12.0332	21.5697	9.94658	11.2044	20.1284	9.04008	9.97553	11.341	10.3773	11.3616	11.1966	11.7217	36.1172	36.6609	25.2083	31.7918	37.491	37.1717	32.5584	11.5606	11.8132	12.1637	13.6456	73.8739	32.4283	33.8613	47.4315	67.6693	30.5999	33.4297	40.1846	40.7072	39.8807	43.1429
1302	0.9	4	0.3	18.4603	14.1985	16.2637	12.9827	19.9364	6.03399	14.4862	42.1784	23.6635	16.4151	21.6636	23.2283	57.17	13.4804	74.4742	45.088	31.481	256.64	30.3196	26.6263	21.3092	24.2552	21.6028	25.8882	16.2885	16.0982	14.2425	13.9722	21.0516	8.12899	22.9633	16.7733	16.2104	16.362	16.8358	18.3634	18.7922	19.8811	46.5704	15.0473	16.8438	14.6753	16.6047	16.1853	15.9641	16.5441
1824	0.1	0.1	0.1	8279.01	6980.24	17684.7	7959.06	4834.11	2805.64	2175.63	1811.39	1564.81	1826.3	1795.02	1887.76	2168.27	6786.52	4633.94	4733.69	2258.18	2106.5	1335.54	1065.29	840.647	827.508	782.803	1681.95	11493.7	9852.13	7436.55	4578.24	2876.87	2175.83	1908.07	1785.31	1560.57	1441.57	1518.57	11182.4	6210.49	8416.19	6693.72	9923.36	8178.42	3387.87	2257.79	1794.9	1469.51	1339.2
1316	0.1	0.1	0.1	0	0	0	0	0	0	0	0	0	0	0	0	0.330401	0.162748	0.444845	0.44955	0.726133	5.48272	1.284	2.34599	2.50496	4.364	2.09308	2.508	2.26443	2.49289	2.51466	0.681448	5.69921	4.66564	2.76058	1.90996	1.24605	3.56432	1.2726	3.58413	4.57034	4.44864	1.75321	4.31451	0.758888	0.242312	0.127896	0.0271802	1.0622	0.169844
1835	2	0.1	0.1	7247.27	5897.13	14609.2	6442.47	4120.88	2455.66	2010.66	1664.94	1299.1	1711.12	1576.82	1319.28	1576.54	6186.96	3875.66	4235.83	1706.95	2152.95	805.347	906.346	867.353	563.069	572.755	2057.01	9157.7	8953.3	6227.63	3719.36	2218.75	2019.68	1660.13	1721.63	1278.46	1312.99	1400.77	8811.98	4906.59	7153.19	5409.59	7408.06	6342.6	2828.49	1930.13	1277.55	1268.72	1290.44
1847	0.1	0.1	0.1	5992.68	5016.29	11593.6	5294.08	3059.36	1985.65	1595.41	1364.69	1224.42	1157.5	1166.16	1362.74	1478.36	4957.97	3340.7	3607.68	1639.23	1724.88	942.837	755.267	600.567	574.258	556.8	1288.15	6814.29	7690.65	5611.55	2642.24	1969.53	1603.81	1416.21	1363.01	1214.76	1154.89	1362.8	6692.84	3926.25	5807.54	4481.01	5836.22	4267.25	2350.15	1602.34	1310.58	1115.47	1035.01
1231	0.2	0.1	0.1	48.5869	92.432	62.4553	52.9472	46.0846	27.6945	26.883	27.1078	26.5904	28.8402	27.9771	28.8087	28.1564	25.537	28.9736	27.4621	38.6547	131.567	53.6233	31.5187	28.0176	39.9103	83.205	57.8134	50.4787	62.0558	54.0874	42.249	45.9281	37.6955	28.2211	27.2051	26.4832	28.758	32.1085	244.137	72.075	163.423	91.83	65.0737	54.6641	46.4576	34.2022	27.8752	26.8246	28.3186
1140	0.9	1.5	0.1	18.457	11.2228	2.96873	28.5157	19.1242	1.45161	0.677137	0.517415	0.85947	0.297961	1.70847	0.749284	0.747986	0.412241	1.01548	0.514939	1.092	0.832129	0.662519	0.4911	0.220964	1.727	0.17775	0.602632	1.74778	0.893596	0.172355	3.22497	2.11261	0.769392	0.230608	0.508782	0.220797	0.173929	1.27303	1.73713	1.79233	5.28359	5.32492	0.299357	0.647351	0.739761	0.687016	0.539738	0.221431	14.238
1296	0.9	10	0.4	23.822	7.87256	11.2601	10.781	14.1992	9.30227	10.8445	11.5258	11.0725	11.3057	11.0281	12.2161	13.0536	13.6509	11.2295	10.5273	11.3222	20.4111	8.55515	10.8502	10.804	17.8866	10.311	9.29937	12.0604	11.1027	11.9584	12.7285	15.225	8.98972	10.9358	11.4224	11.3597	11.6608	13.5176	16.1218	94.1562	13.2527	107.043	7.57508	16.0254	11.8701	11.0727	11.3632	11.1158	11.7236
1659	1.5	0.4	0.1	29.2547	31.6711	24.1201	17.7885	20.4538	20.56	21.1556	21.8037	19.9225	20.8712	22.5353	21.9294	29.3969	26.7072	15.5755	30.7698	25.7348	16.8349	21.2899	31.9611	20.0821	21.4779	21.5875	25.1591	31.7375	23.6543	90.1886	76.082	81.9773	24.744	22.64	22.5731	21.6768	22.8437	35.1118	39.3363	31.0135	33.2244	75.7406	57.7626	63.5757	44.2934	21.7919	22.713	21.8156	31.7833
1277	0.7	2	0.3	4.10418	4.91576	4.43724	4.33722	6.69983	2.88664	4.26589	4.26746	5.40368	3.53746	7.30668	5.29701	4.86038	4.39482	6.35517	3.35783	4.13416	27.0822	14.8814	4.36635	4.22284	4.47781	4.34802	4.22107	5.20605	5.46681	4.45034	4.90676	6.01043	3.40856	4.20198	4.28277	4.14583	4.26237	4.51572	6.99955	6.04562	4.68126	5.54505	3.17653	4.64995	3.99098	4.29276	4.31566	4.14247	4.31431
1021	0.1	0.1	0.1	115.264	212.708	218.926	167.129	98.1506	61.6253	35.8531	24.4949	16.0629	14.0955	12.8428	13.5687	13.3759	12.0652	13.5739	12.5287	16.8258	13.0898	12.6146	11.7337	11.6163	23.0168	22.6863	39.9928	53.9798	213.079	84.4031	49.0191	200.26	133.053	78.5362	43.0877	28.6696	23.7746	19.6105	16.4794	13.6125	56.8744	393.979	262.238	121.985	112.508	51.5976	34.1688	28.4732	30.1977
1280	0.7	0.1	0.3	77.2629	98.0041	99.98	31.6628	17.9528	10.0912	11.5596	13.4798	125.128	83.3245	108.094	123.973	113.521	94.2583	124.722	100.779	104.46	99.1566	97.3631	93.4505	16.0629	106.113	57.5268	32.3846	30.4416	33.1741	23.56	18.664	29.2767	19.8889	16.6004	13.261	13.313	13.7179	13.2791	13.719	14.5925	13.6665	14.2725	12.2999	13.3154	13.4698	13.0182	12.6361	12.9629	13.9015
1120	8	0.1	0.1	2.76553	2.0466	8.03162	2.12882	2.22573	2.12404	2.08473	2.06062	1.99662	2.12819	2.0829	2.17669	2.12695	1.91818	2.15228	2.05132	2.13424	2.09539	2.07764	2.13919	2.06173	2.26495	2.20659	2.29949	2.26026	2.21549	2.46961	2.26668	17.2853	32.3838	17.5519	17.3358	7.14638	12.6938	7.63975	7.58782	7.55834	7.91675	8.81269	7.54477	13.1803	2.07224	2.07876	2.06426	1.9977	99.38
182	4	0.1	0.4	693.832	611.548	204.019	139.852	52.0388	18.8345	21.056	20.2776	19.801	20.9691	20.3836	22.1283	26.2006	265.907	142.818	45.6522	19.4775	18.5906	18.3348	17.4053	17.1232	18.8789	41.628	503.763	305.431	456.627	456.611	452.98	157.06	70.5488	41.7006	20.635	20.9816	50.939	465.718	395.383	422.577	521.288	664.672	318.998	119.517	73.8307	18.1633	21.5701	48.0894	48.6711
7311	1.5	0.1	0.1	13.1935	38.1557	63.7976	25.7195	16.7342	9.80656	7.48195	7.50364	4.96466	5.18674	5.02912	5.30137	5.19045	4.78148	5.55379	5.21733	5.9505	7.71223	5.05779	9.81114	7.25782	7.6185	40.8795	4.19722	33.3836	22.6667	28.6925	13.0543	72.5808	66.5538	22.9371	17.8342	12.1353	14.7079	9.74405	13.6195	22.1073	52.0339	43.636	85.2352	43.2603	24.6328	12.5022	10.0149	12.1161	9.95511
1755	1.5	1	0.5	63.594	55.8813	56.3989	48.7561	46.7621	40.8044	44.6377	43.4782	40.8648	41.248	50.312	51.0921	49.2024	59.7025	34.2203	51.3392	42.2685	74.8469	39.3513	44.4662	42.4485	45.3998	66.4273	61.8154	82.0172	90.1069	79.5708	108.303	90.0259	64.0881	45.3716	52.5673	56.5279	40.9939	53.6034	87.1913	52.2673	86.7358	67.241	129.204	138.265	73.061	103.305	100.457	91.8077	53.2901
1152	0.5	0.3	0.1	0	0	0	0	0	0	0	0	0	0	0	0	0	0	0	0	0	0	0	0	0	0	0	0	0	0	0	0	0	0	0	0	0	0	0	0	0	0	0	0	0	0	0	0	0	0
1192	2	0.2	0.1	257.905	318.277	253.998	259.254	272.657	176.306	129.248	116.246	98.4095	121.364	100.871	122.47	121.646	97.9146	142.071	118.56	123.911	215.443	138.842	111.255	78.7417	103.672	104.905	102.977	128.298	174.813	167.268	132.022	99.268	94.7516	79.8093	62.4908	60.9451	64.1366	65.1873	432.116	206.377	357.446	237.296	181.41	155.764	131.65	115.135	80.0683	79.07	82.8456
541	10	0.1	2	22.5197	89.8225	20.9071	29.5703	1328.59	406.078	124.001	20.7386	20.7724	91.8358	20.5697	21.188	21.0825	19.442	21.4077	807.072	286.726	146.4	45.0007	31.6176	25.4848	30.1273	26.6952	27.0681	28.6544	23.6775	26.8533	67.0574	507.638	176.746	63.165	93.0309	20.386	21.2834	20.9467	21.5234	21.5436	19.6046	22.1087	30.0277	962.49	365.394	82.0687	20.8913	19.7778	22.1417
1822	2	0.2	0.1	5116.59	3915.01	8969.68	4136.67	2739.77	1556.47	1455.97	1228.25	977.265	1016.95	1013.35	1307.88	1341.83	4333.67	2732.37	2937.84	1442.59	1585.06	849.684	714.387	612.332	482.712	465.482	951.509	5447.33	6397.14	4748.61	2034.3	1670.54	1468.91	1224	1274.85	1229.29	1004.59	1452.37	5463.41	3462.93	4770.87	3820.33	4820.16	3338.83	1876.01	1397.66	1224.78	969.13	789.947
972	1.5	6	0.1	88.6965	191.807	564.582	354.195	245.436	101.195	73.8345	59.298	18.416	33.0739	6.82995	21.0153	7.17702	6.55715	7.74401	7.356	141.946	5.38237	6.8121	6.70322	19.0641	6.28573	7.65081	8.48698	8.52237	36.6529	68.458	19.3253	36.7588	38.8833	34.9343	19.371	18.5034	6.7794	6.67021	7.28101	8.21431	12.7145	108.679	266.548	79.5532	61.9249	34.8794	32.5972	16.8065	6.46431
613	1.5	0.1	1	108.025	257.84	305.687	603.304	1333.64	826.271	279.556	31.7991	30.7436	59.4706	131.685	136.408	104.79	91.467	185.451	381.491	299.82	64.7027	27.6715	29.8902	29.1002	30.2916	29.0478	29.0204	35.6893	34.6107	155.659	341.384	587.292	265.911	23.3555	28.9068	29.3418	30.5496	39.5183	32.3649	32.6723	56.3346	418.261	472.713	565.712	475.137	156.257	29.9219	28.6134	34.4917
1086	0.2	0.1	0.1	0.753372	0.672051	0.579498	0.655429	0.2213	0.31513	0.298215	0.696791	1.9865	3.48855	0.904612	0.626629	0.609346	0.589585	0.649213	0.591779	0.182816	0.28664	1.63152	2.0046	0.307892	2.46585	0.598223	0.601243	0.60488	0.620608	0.540645	0.552944	0.153299	0.288701	0.349498	1.6548	1.96488	3.52412	0.717276	0.679257	0.850207	0.888697	0.583287	0.372517	0.128751	0.233694	0.225259	0.227388	0.213515	2.57946
1295	0.2	0.1	0.1	26.0283	54.7988	41.284	26.133	33.0749	14.7587	15.5032	15.1974	15.7634	16.5976	18.6215	17.1671	20.5125	15.1535	15.3318	15.3184	19.0329	37.3166	26.6921	15.525	16.0224	19.1233	91.2797	26.9278	35.7306	28.3133	35.3823	77.8018	83.0666	23.771	16.6092	15.7534	15.1728	17.8534	111.531	138.006	69.0335	140.376	119.273	28.125	105.833	23.0592	21.1397	20.9496	16.5173	15.8438
1139	0.8	0.2	0.1	15.1043	18.8243	3.80348	3.75187	4.92355	3.30751	3.6439	3.73568	8.76881	7.33069	17.8035	15.6605	16.1247	23.7059	15.7507	16.66	17.6202	17.3498	9.4865	4.13592	4.0127	21.7223	14.7492	16.1933	22.9993	16.7864	17.774	16.2502	31.1434	19.0194	14.2098	18.5546	17.987	18.4543	18.4353	24.1638	20.5881	17.797	18.451	17.7874	17.9076	17.3064	17.0515	17.1945	16.3777	27.5163
1862	4	2	0.2	790.496	499.632	1638.7	594.06	356.249	157.347	75.7272	80.9605	80.7125	106.111	133.162	96.6096	127.293	786.185	307.544	201.045	105.269	151.693	74.315	78.545	73.1303	74.5452	66.4759	126.084	780.25	1075.6	517.331	511.153	85.8776	123.433	79.455	86.4617	72.3162	94.84	263.098	846.509	426.282	777.074	626.44	656.371	264.791	146.668	100.272	80.373	81.9763	82.1147
629	3	0.3	0.1	2179.65	4337.16	3702.32	2211.53	3279.62	4622.97	2196.67	1655.22	1661.3	1881.7	1655.11	1678.49	1884.34	1412.38	1902.87	1442.87	1672.68	1656.25	1674.75	1647.59	1448.48	1676.57	1450.63	1671.04	1672.53	1397.89	1665.47	1445.81	1668.02	1445.4	1464.72	1499.87	1203.06	1465.45	1234.46	1539.9	1232.46	1419.39	1570.09	1226.21	1253.55	1241.06	1252	1532.45	1375.66	1422.22
1000	7	1.5	0.1	6.37519	72.4463	56.5902	37.0954	17.4761	14.064	5.90123	5.93599	5.71307	37.3966	7.29394	43.2487	6.66298	45.6959	22.2466	16.4442	95.0236	97.8686	47.9403	16.5262	13.845	21.6269	63.5728	52.6811	82.9054	66.5828	56.0203	22.52	23.7743	42.2254	11.8736	30.5901	4.86082	5.80546	32.7279	135.472	79.6316	16.9108	20.3672	148.943	67.3533	28.1232	11.2405	8.77155	8.43442	101.259
7306	0.1	0.1	0.1	7468.62	6265.24	15257.2	6849.31	4269.38	2533.15	2004.22	1687.77	1468.51	1600.79	1444.67	1655.31	1898.4	6056.41	4123.5	4318.09	2017.29	1959.7	1177.76	971.198	759.792	730.621	687.483	1713.85	9610.26	9057.67	6788.11	3712.43	2556.38	1988.53	1761.15	1674.96	1470.24	1361.23	1442.19	8966.14	5296.09	7307.26	5792.33	8015.88	6595.45	3005.97	2021.39	1623.92	1344.17	1224.39
991	10	0.6	1.5	78.5795	148.462	167.074	98.4303	126.465	57.7655	35.8925	26.6908	18.7461	20.0605	11.9279	17.131	11.0646	14.6148	28.7604	10.1362	59.3243	50.258	42.4634	52.1493	37.4548	41.5651	152.275	112.916	87.7486	139.681	105.478	60.8877	112.51	142.278	104.295	54.4764	37.012	30.3849	23.0086	19.987	17.9169	53.9628	87.797	213.675	144.223	141.105	120.129	57.3166	33.3004	32.1414
7317	0.2	0.1	0.1	66.768	146.042	393.992	66.2574	65.2456	31.7102	32.3675	31.6879	30.5236	31.3819	30.341	32.4798	36.3949	41.4447	30.2727	47.3319	31.5171	31.4703	31.5084	31.3199	29.9787	30.7291	30.8453	46.0791	251.497	163.866	92.6434	62.9699	33.8789	31.0961	31.9748	33.0193	31.4359	31.295	38.5406	214.645	91.4869	162.477	62.852	233.067	249.186	46.5461	32.6791	32.1799	31.0063	31.874
998	0.7	0.8	0.1	189.751	135.812	163.624	231.025	711.137	361.916	147.091	156.874	165.092	164.209	155.851	159.194	155.715	137.15	168.027	130.581	85.6662	15.9469	4.39536	5.2115	3.35245	15.5514	13.2502	13.9834	14.9048	15.0761	17.4195	13.0221	11.6702	25.96	16.978	14.124	14.3259	15.8272	16.3328	81.3324	78.2929	49.0797	147.35	181.349	136.909	142.712	54.6098	17.7882	48.5722	112.38
1716	1.5	0.2	0.1	37.2838	36.3658	208.222	71.4018	51.9066	29.2688	31.6358	30.5827	29.5517	31.0378	32.063	40.3081	30.5254	40.5113	25.8368	32.8507	219.544	50.7802	35.8966	32.1179	30.6372	31.8572	31.147	50.3529	205.387	223.578	192.399	90.2229	45.4947	48.0381	31.3878	30.3918	31.0926	31.794	32.8668	386.674	217.178	98.4545	109.63	240.025	254.635	208.639	53.7162	32.3829	31.0047	188.869
1896	4	0.3	1	569.108	490.836	1192.54	494.064	407.603	245.227	272.417	213.727	250.542	232.248	150.289	218.37	154.534	929.159	341.159	360.175	316.943	200.507	168.969	182.746	140.675	139.352	123.491	181.835	452.81	394.275	360.781	586.174	169.191	278.824	214.119	210.626	142.287	166.326	218.513	571.198	407.821	495.239	616.41	433.781	330.115	197.439	209.457	216.129	248.982	143.742
1883	0.1	0.1	0.1	284.954	206.905	501.894	108.87	73.2567	44.2354	26.3742	17.8719	17.9335	18.1788	25.5952	34.1169	31.3412	308.978	77.695	42.7991	21.1734	19.8518	17.0366	17.1719	16.1226	17.436	15.3504	30.9785	290.458	323.334	116.592	123.769	54.1112	34.4771	28.269	20.3196	16.3967	17.4799	18.2027	119.039	198.465	280.85	281.265	256.328	66.0151	46.995	25.7033	21.9229	22.3116	17.031
1285	0.8	3	0.2	4.43267	4.24034	5.86051	15.815	38.1181	2.55308	3.76264	3.69845	3.58322	3.77152	4.25556	35.9349	4.2534	3.84292	20.1198	9.29365	8.18157	103.319	29.3463	7.31831	7.29816	9.50868	3.8822	7.17938	3.8101	5.67596	3.86146	5.87251	19.292	2.94133	3.76154	3.68742	3.559	3.67907	3.69103	5.31926	27.0127	31.6222	38.8987	8.8916	16.0176	5.32787	5.44131	5.47046	3.58525	3.71443
1266	2	0.2	0.1	9.58951	18.4436	18.0767	13.0203	23.3119	8.92681	6.57471	6.5121	6.24017	6.48294	6.28695	6.51399	6.5112	6.13711	7.39193	6.71879	6.8453	7.44328	7.0413	6.48078	6.25647	6.57456	6.73767	6.79176	6.72369	6.34841	6.88809	6.7982	7.62541	6.15685	6.45026	6.33279	6.09781	6.34912	6.28554	14.6152	23.6731	64.738	58.7577	17.3332	48.3171	11.774	8.41644	10.4957	8.22048	6.49034
1176	1.5	0.2	0.1	61.4565	116.873	17.2609	15.4622	23.8477	14.2452	14.1822	11.5101	100.208	64.781	167.461	103.315	93.9171	91.4084	91.7216	23.4375	19.5887	28.4264	29.7632	20.72	13.1523	56.5236	13.169	16.24	14.609	19.591	11.6347	11.0723	118.988	102.974	74.8785	92.3418	46.9516	17.7669	13.4683	12.1229	44.8733	68.4824	29.7103	16.2368	22.9754	30.1668	33.1096	29.4343	12.2005	117.861
924	2	1	0.5	13.9745	29.8525	28.5841	22.256	20.2246	29.4564	18.9416	23.4866	26.0174	29.5666	19.2797	33.0499	17.2718	49.3451	23.6408	31.6831	21.8183	28.0573	64.1932	27.8543	43.9283	30.9228	29.7292	19.527	21.4187	65.1706	42.2961	39.827	67.3672	43.4822	65.8709	42.5192	51.6067	55.5967	58.6237	53.3447	51.974	63.5417	57.2856	50.1912	50.6704	45.8942	46.7639	46.4402	27.9308	24.0787
758	8	0.4	0.1	90.3856	105.898	79.7495	47.0782	48.4177	45.0317	48.398	48.9192	48.2797	80.5963	48.0948	80.6887	49.3267	45.0081	80.1834	47.6947	49.1729	40.5808	49.2836	47.8578	46.524	51.1082	47.3043	48.8766	49.1733	43.8284	48.8514	47.4392	49.0618	51.2874	48.8929	48.1784	47.1568	83.4511	80.1401	80.2463	80.6871	44.4133	79.3149	47.2643	48.3087	47.3172	79.675	47.1985	46.211	49.322
1257	0.1	10	0.1	0	0	0	0	0	0	0	0	0	0	0	0	0	0	0	0	0	0	0	0	0	0	0	0	0	0	0	0	0	0	0	0	0	0	0	0	0	0	0	0	0	0	0	0	0	0
895	0.3	0.1	0.1	2938.84	2670.25	3020.29	3132.23	3056.37	2886.13	2874.98	2410.18	2212.44	2297.28	2226.46	2300.92	2296.46	2072.56	2289.82	2214.07	2277.24	2182.82	2248.27	2035.09	1920.72	1993.09	1933.46	2002.87	2004.25	1935.5	2098.38	2191.19	2280.55	2338.39	2226.12	2359.38	2330.08	2467.08	2434.38	2481.86	2528.67	2288.87	2742.83	3249.68	3452.83	2894.4	2818.17	2783.32	2640.81	2691.04
1317	3	4	0.1	2.97208	6.2784	6.61898	6.74081	39.5326	2.74494	3.94339	222.6	28.7695	19.7122	13.1022	19.4572	16.5132	5.22014	5.8782	6.15242	20.5852	86.4364	27.0721	19.9231	14.4837	56.7587	13.3575	12.5202	6.54326	13.5905	15.6317	5.71491	6.37719	5.92386	6.12877	5.72623	5.89187	6.45255	6.15528	6.35793	4.55805	5.87619	5.7232	5.26325	4.74313	6.10669	10.824	4.11654	5.33407	7.38649
1242	0.9	0.1	0.1	35.9582	46.4045	46.345	36.0901	21.4124	4.55724	4.52841	4.34825	47.4702	199.534	48.8809	53.675	52.3925	46.3062	50.1897	49.1456	39.746	37.6336	27.1572	7.5373	19.6794	9.24779	9.86644	8.68295	10.5607	5.18562	4.69163	3.57643	4.67169	4.32921	4.23938	4.03808	3.891	3.92403	4.13318	9.031	8.33802	25.5031	30.4663	56.3092	5.6399	4.08804	3.91838	3.51787	3.58705	10.7494
107	5	0.3	0.7	89.3471	103.048	137.225	26.5059	27.8618	28.7199	29.8713	29.2119	27.4581	27.5125	29.6871	54.2555	34.5095	28.9804	88.9312	23.5424	29.4256	27.3252	28.8406	28.2411	26.4153	26.7669	61.1936	260.468	225.373	208.743	142.279	91.1189	27.7897	29.2892	30.0015	29.4634	27.8248	28.1139	37.8145	120.927	204.439	228.493	273.901	19.0099	29.9905	28.6212	30.2016	29.705	28.0913	28.3131
1841	3	0.1	0.2	175.44	159.152	409.853	197.819	72.6753	44.5009	20.6525	20.6786	21.1584	10.6592	51.1475	10.1584	12.3605	136.053	129.216	16.9326	20.8149	34.0524	10.2969	10.8925	10.1867	11.2404	11.5685	95.1326	221.607	297.729	107.528	79.9436	26.9698	19.8919	20.939	10.9645	10.1699	10.958	82.9191	206.598	98.4018	121.51	102.819	114.211	102.28	48.1165	29.5556	20.5612	10.4886	10.7625
907	0.3	0.7	5	240.064	203.371	279.548	242.951	173.713	129.498	89.6549	93.6982	92.8404	87.6751	75.9053	71.5365	62.6666	77.9982	85.3035	106.954	81.3584	66.027	65.9527	69.9013	67.7525	66.7669	74.9013	67.9059	63.6638	131.613	495.791	374.88	405.697	365.729	271.19	173.404	129.648	136.827	210.746	382.312	319.951	410.911	657.732	852.375	543.499	292.004	290.407	178.688	130.799	216.53
80	0.3	0.8	0.4	221.875	280.991	312.657	214.229	112.97	104.393	81.1877	124.2	193.534	101.816	166.556	226.83	174.203	322.635	236.674	203.415	209.026	167.238	64.9954	85.4493	98.9177	84.3807	119.889	218.623	297.619	559.628	352.711	340.021	121.88	109.787	83.4844	104.737	253.556	145.903	150.627	247.798	354.974	531.428	473.327	164.291	163.691	111.726	110.168	113.199	83.2993	240.014
1236	0.2	0.1	2	1.14036	1.51829	1.61851	1.52486	1.73614	1.6003	25.0575	23.9477	24.4271	26.2524	24.556	17.7288	4.55008	5.04465	9.31749	8.8237	7.70712	7.26007	6.13554	4.68125	4.03881	33.3614	14.7831	11.4237	10.6306	9.92286	12.1483	10.5633	12.3473	19.2801	10.1728	9.56928	7.94473	7.44652	5.49147	5.71614	5.29997	4.95643	8.51877	9.58431	9.28573	7.58662	5.38368	4.63389	3.31446	2.21459
981	3	0.1	0.2	115.741	144.804	278.026	406.24	254.564	120.601	117.019	118.408	105.903	106.788	106.464	107.063	95.189	105.956	95.2343	106.673	113.347	77.2799	20.7623	23.2267	11.693	12.1867	12.3337	12.8968	13.1701	61.7044	12.1579	10.2607	25.1643	28.116	29.7764	47.0094	35.4024	35.9081	23.8329	36.0207	36.1297	56.0995	56.4601	73.8304	56.9961	45.9356	66.6774	59.1617	70.6932	59.6045
1093	0.3	4	10	19.9596	27.6867	34.9258	31.4383	37.3286	28.7017	17.9143	10.9977	11.0313	12.536	14.1393	25.8659	25.1548	49.1711	46.641	37.5945	66.4377	61.6383	51.4156	50.3085	21.8334	23.4012	23.4009	23.0227	164.319	66.6313	86.9532	50.3041	101.608	51.1554	50.4186	56.9577	26.8024	19.2568	19.8497	148.865	35.7687	70.6148	59.4249	64.7117	196.098	38.1224	56.9212	22.8547	15.8369	14.8239
1709	4	0.5	0.1	69.3548	44.762	140.333	105.852	66.7688	44.3033	52.7265	50.3907	42.3689	44.9507	49.4379	26.4001	29.4991	52.2501	47.6177	44.6943	55.7221	141.575	43.4064	43.8017	46.9002	54.21	41.1117	60.5381	59.5394	93.6412	182.922	61.5428	55.0388	55.6218	73.0554	46.0753	43.5895	46.4176	59.2087	52.2015	49.3219	49.5672	52.9202	130.599	95.1309	42.5147	50.6031	45.2889	44.5806	47.9192
1017	7	1	1.5	17.9465	64.1863	91.3853	35.0075	20.421	9.04885	8.09639	8.14065	7.86936	8.12587	9.19034	7.58819	10.2388	15.5218	6.81967	7.0966	53.7862	39.6005	21.1591	8.74612	10.3897	8.49105	9.48071	11.7545	101.885	102.722	50.7182	67.6298	86.9178	85.3555	31.294	41.6529	22.3274	18.619	59.7859	287.87	65.4336	65.8798	87.5916	129.866	68.7522	69.7892	77.7528	85.8028	90.8824	45.0339
1194	2	0.2	0.1	8.69121	15.2037	13.6695	11.5921	11.8625	5.99807	6.09278	6.09024	6.12025	8.14026	6.08722	7.1026	8.03084	7.49367	10.9605	10.0664	10.1169	8.17727	6.20574	6.16208	6.03719	86.7486	45.9289	58.0965	26.0228	23.7324	24.5187	20.4484	66.325	58.5834	30.7466	16.7709	14.8156	11.588	11.4669	10.0745	8.30811	8.05812	10.6895	8.31824	10.1087	6.24568	6.22203	6.17824	5.95466	6.23517
[truncated: 434 more columns]

## Sheet: Storage(WG inflow-No Demand)
grand_id	p1	p2	p3	1980-01	1980-02	1980-03	1980-04	1980-05	1980-06	1980-07	1980-08	1980-09	1980-10	1980-11	1980-12	1981-01	1981-02	1981-03	1981-04	1981-05	1981-06	1981-07	1981-08	1981-09	1981-10	1981-11	1981-12	1982-01	1982-02	1982-03	1982-04	1982-05	1982-06	1982-07	1982-08	1982-09	1982-10	1982-11	1982-12	1983-01	1983-02	1983-03	1983-04	1983-05	1983-06	1983-07	1983-08	1983-09	1983-10
610	0.4	0.5	0.1	36700	36700	36700	36700	36700	36700	36700	36700	36700	36700	36700	36700	36700	36700	36700	36700	36700	36700	36685.7	36500.8	36235.4	35992.8	35772.6	35566.3	35372.2	35396.5	35861.2	36280.2	36187.8	35888	35548.5	35182.5	34853.7	34562.4	34310.1	34222.4	34448.8	34871.8	35760.2	36667.1	36686.6	36493.5	36198.7	36248.1	36515.8	36695.5
753	0.6	0.5	0.4	20997.3	21143.1	21229.2	21552	22462.5	23205.5	23317.6	22776.1	21997.4	21356.2	21029	20869.8	20852.5	20855.8	20841.6	20938.5	21144.4	22271.6	22707.3	22215.1	21445.8	20901.6	20672.8	20489.4	20359.3	20323.1	20360.4	21444.2	23768.9	25629.8	26707.8	26632.6	26141	25829	25785.4	25854.5	26094.1	26486.7	26747.5	27226.6	27912.1	29318.2	29851.3	29197.2	28329.2	27613
870	0.9	0.5	0.4	20292	20296.2	20297.1	20292.1	20295.5	20297.2	20300.8	20278.5	20277.3	20300.2	20294.2	20295.3	20293.4	20297.1	20297	20297.4	20300.8	20298.7	20279.8	20118.7	19772.6	19535	19352.8	19230.1	19102.5	18953.7	18841.3	19872.1	21157.7	21432.8	20853.1	20302.3	20295.1	20294.2	20295.1	20298.7	20294.5	20295	20294.3	20293.4	20298.1	20297.4	20292.8	20295.7	20296.1	20295
597	0.4	0.6	0.4	22819.5	23557.9	25026.8	25070	25070	25070	25017.5	24489	23754.5	23252.4	23052.5	22917.3	22709.3	22370.3	21872.1	21395.7	21767.8	22260.9	21864.2	20983.2	19926.2	18711.8	17796.8	17156.3	16296.5	15483.9	14903	15125.4	16049.4	17675.6	18117.8	17533.5	16420.8	15501.7	14983.2	14670.3	14419.7	14246.8	14784.8	16354.1	18209.3	21942.2	23704	23654.4	23212.6	22893.3
307	0.2	0.4	0.1	20981.2	20873.2	20821.4	20956	21202.7	21364.6	21404.6	21020.6	20723.8	20614.3	20624.1	20653.6	20693.4	20723.8	20851.6	21274.2	22150.4	23560	23525	23257.5	22968.2	22884.2	22967.6	23092.7	23212.3	23330.5	23556.1	23560	23560	23560	23560	23543.4	23524.3	23559.2	23560	23560	23560	23560	23560	23560	23560	23550.5	23422.4	23073	22684.9	22545.7
1753	1.5	0.1	0.1	4927.14	5068.46	5745.22	7080.35	5128.91	5098.8	5092.94	5095.95	5054.09	5072.79	5067.24	5047.28	5053.94	5008.28	5091.59	5058.62	5122.77	5040.92	5108.85	5074.29	5154.36	5237.14	5206.41	4953.91	4951.66	5451.07	5163.28	5072.76	5103.64	5087.26	5060.57	5066.95	5091.67	5083.11	5039	4865.32	5085.69	5017.04	5094.23	5012.72	5051.82	5118.65	5078.36	5087.41	5088.08	5073.39
297	4	0.6	0.3	3884.06	3445.79	2922.32	2983.72	4423.89	5114.81	5094.42	4907.51	4900.77	4782.79	4547.04	4270.31	3948.85	3765.16	3613.79	3409.42	4082.21	5096.8	5109.52	5072.9	4834.98	4592.52	4314.23	3908.73	3508.69	3021.59	2931.54	2917.03	3279.67	4596.44	5124.79	4985.23	4861.42	4909.66	4716.59	4286.33	3838.55	3428.39	3041.26	2964.62	3329.89	4207.03	4944.42	5032.87	4839.67	4503
1036	6	0.9	0.4	2010.25	2174.43	2408.15	2630.19	2652.02	2650.52	2565.2	2440.26	2318.14	2208.92	2105.4	2022.91	1950.27	1890.99	1870.79	1820.3	1768.34	1755.06	1717.07	1642.83	1553.05	1457.83	1427.85	1409.83	1409.62	1761.09	2009.08	1988.45	1912.24	1882.92	2028.04	2181.25	2333.54	2462.53	2586.01	3091.84	3284.26	3134.54	2928.4	2746.59	2784.16	2704.71	2651.14	2651.37	2650.94	2650.66
989	1.5	1	0.3	1813.37	1912.49	2451.75	2630.86	2547.49	2544.64	2523.71	2427.31	2302.09	2151.59	1993.19	1860.61	1796.49	1713.9	1741.63	1752.3	1777.25	2456.67	3174.39	2812.99	2542.72	2539.95	2532.64	2540.28	2539.23	2592.56	2617.18	2543.65	2535.18	2566.38	2551.42	2539.96	2542.32	2539.92	2537.76	2528.47	2544.27	2536.85	2542.41	3322.37	3939.23	3786.55	3179.64	2596.15	2545.22	2513.4
1135	9	1.5	0.2	2548.59	2528.53	2536.84	2512.6	2484.38	2545.02	2527.35	2451.16	2358.53	2524.48	2537.92	2504.45	2552.17	2551.92	2534.23	2544.09	2528.14	2540.83	2542.87	2541.14	2531.26	2593.47	2765.25	2547.46	2541.35	2540.08	2544.43	2545.67	2530.66	2938.02	2958.72	2611.13	2543.41	2544.3	2541.26	2540.42	2539.32	2533.98	2543.33	2540.9	2538.62	2542.8	2546.22	2539.49	2527.29	2506.03
1269	0.8	0.1	0.1	4392.46	4588.51	4649.09	4749.23	4998.82	4983.73	4623.52	4390.32	4391.8	4386.98	4391.81	4386.85	4389.67	4386.27	4387.02	4388.2	4385.64	4384.66	4392.27	4386.08	4389.26	4392.1	4388.94	4388.7	4387.41	4385.09	4390.04	4384.73	4393.56	4390.94	4392.21	4390.46	4392.56	4387.72	4385.66	4560.77	5299.34	5572.49	6051.85	6104.48	5887.01	5743.61	5423.16	4986.73	4516.08	4387.8
1077	5	0.3	0.1	2553.93	2531.75	2609.35	2632.85	2789.69	3214.35	3181.62	3095.16	2976.6	2866.15	2737.72	2607.47	2495.57	2358.73	2266.26	2219.99	2145.65	2082.33	2033.04	1935.57	1883.82	1921.85	2368.34	2664.52	2736.33	3205.55	3229.52	3242.64	3149.13	3234.81	3243.56	3228.94	3266.9	3256.97	3211.84	3228.41	3184.39	3138.82	3243.62	3221.66	3207.74	3239.83	3257.85	3272.36	3214.07	2951.47
1026	0.4	0.2	0.1	2918.68	3039.96	3161.75	3275.51	3237.94	3125.66	3016.1	2947.39	2891.02	2832.64	2786.09	2851.7	2882.13	2945.53	2987.18	2982.3	2987.95	3079.2	3103.94	3011.13	2982.75	2974.27	3110.65	3090.73	3062.62	3658.93	3968.76	3887.61	3723.52	3545.79	3401.52	3226.16	3094.47	2978.68	2936.67	4027.45	4254.35	4261.82	4197.37	4204	4270.12	4233.86	4104.95	3931.44	3746.07	3586.02
740	9	4	0.9	1615.37	1640.08	1645.86	1613.28	1530.28	1455.31	1405.71	1411.51	1493.71	1518.12	1550.82	1574.75	1578.96	1577.39	1559.73	1538.81	1499.48	1543	1566.27	1545.25	1565.31	1641.35	1656.49	1685.14	1702.34	1696.32	1684.33	1668.03	1642.79	1626.05	1623.31	1620.1	1607.86	1701.72	1698.72	1690.16	1689.83	1686.25	1689.27	1663.81	1607.11	1586.02	1578.65	1551.46	1629.35	1691.74
1294	1.5	0.1	0.1	2776.18	2776.55	2773.28	2770.68	2736.36	2716.58	2712.33	2697.96	2675.93	2693.31	2715.7	2771.3	2771.87	2775.89	2772.07	2776.57	2775.17	2797.46	2786.65	2775.29	2775.97	2773.5	2775.95	2775.2	2775.55	2774.5	2774.69	2775.2	2774.28	2775.56	2775.12	2775.5	2775.37	2775.19	2774.7	2775.06	2774.46	2772.18	2774.27	2776.82	2774.08	2775.01	2775.55	2775.99	2775.19	2775.62
1848	1.5	0.8	0.2	1503.15	1539.86	1744.59	2110.89	2126.58	2004.86	1860.11	1708.84	1559.34	1467.01	1460.65	1518.79	1481.09	1515.53	1501.6	1503.36	1485.17	1477.81	1477.72	1456.55	1433.15	1404.56	1376.96	1351.28	1505.68	1662.56	1714.96	1791.1	1799.75	1694.05	1562.54	1475.73	1447.21	1422.81	1405.54	1837.44	2311.57	2445.14	2499.34	2548.42	2635.98	2621.52	2471.96	2309.06	2145.03	1981.07
1869	1.5	1.5	0.2	1285.66	1402.15	1609.25	2296.23	2300.21	1926.37	1520.16	1317.37	1281.36	1249.99	1214.46	1188.84	1180.1	1232.07	1328.78	1335.68	1334.41	1316.96	1288.84	1241.89	1193.67	1142.04	1090.2	1040.22	1023.18	1250.8	1336.28	1392.96	1429.36	1334.96	1320.84	1293.04	1257.31	1220.46	1179.93	1608.84	2462.26	2741.48	2769.29	2777.41	2776.25	2713.24	2290.56	1846.51	1440.13	1309.57
1863	0.6	0.5	0.1	2635.99	2805.45	3024.4	3147.57	3119.85	3082.17	3015.08	2921.78	2821.97	2735.04	2653.79	2595.88	2527.39	2552.84	2597.25	2556.16	2483.81	2400.84	2307.55	2211.41	2132.37	2054.55	1985.49	1892.67	2041.24	2350.01	2501.36	2498.82	2504.17	2444.07	2363.63	2281.74	2196.88	2126.27	2058.64	2148.81	2312.16	2452.63	2556.8	2719.93	2728.95	2680.25	2603.16	2511.13	2425.85	2340
1770	0.4	0.7	0.1	2703.65	2853.12	3057.86	3147.8	3142.22	3107.79	3052.3	2985.23	2915.87	2845.94	2775.97	2702.03	2632.73	2668.1	2775.81	2797.63	2798.27	2780.15	2752.93	2697.8	2638.73	2575.44	2510.36	2479	2653.93	2946.08	3122.93	3146.64	3122.47	3076.99	3016.05	2951.41	2888.23	2818.29	2745.63	2803.55	2955.44	3053.2	3119.29	3139.44	3147.7	3144.39	3107.12	3044.8	2979.85	2914.29
965	8	2	0.5	809.93	847.011	942.433	1188.98	1174.17	1110.16	1099.38	1055.97	1001.58	950.627	896.9	850.284	806.233	762.277	717.628	690.716	668.144	661.295	630.088	541.808	512.078	485.468	445.418	426.21	417.778	419.245	599.392	776.038	938.828	1146.72	1117	1108.58	1108.32	1097.55	1076.92	1049.8	1026.23	1042.58	1099.22	1295.15	1327	1231.38	1149.14	1102.97	1073.92	1035.19
1247	1.5	0.4	1	1803.26	1772.5	1745.9	1706.99	1668.48	1647.5	1601.44	1535.41	1467.56	1724.95	1762.45	1820.38	1807.16	1808.36	1805.33	1806.39	1805.73	1801.09	1787.16	1773.16	1759.69	1954.35	2203.07	2047.29	1857.95	1805.66	1807.06	1806.62	1811.91	1861.49	1855.37	1807.21	1806.92	1806.17	1807.9	1808.73	1805.87	1806.18	1806	1806.78	1807.92	1805.32	1800.92	1776.38	1743.67	1708.84
7313	0.3	0.1	0.1	2304.25	2339.88	2476.86	2529.9	2529.9	2529.9	2513.34	2359.87	2161.22	2131.66	2194.11	2264.3	2338.73	2379.26	2521.64	2529.9	2529.9	2529.9	2504.78	2316.22	2066.47	1852.25	1830.83	1903.75	2030.21	2134.01	2514.62	2529.9	2529.9	2529.9	2526.5	2434.8	2282.36	2296.66	2410.75	2514.09	2529.9	2529.9	2529.9	2529.9	2529.9	2529.9	2527.99	2439.45	2298.42	2259.45
1287	7	0.3	0.4	1480.44	1645.41	1647.34	1658.37	1629.44	1697.3	1707.95	1640.98	1531.8	1486.97	1507.99	1460.23	1437.65	1366.39	1308.78	1307.31	1304.15	1511.83	1657.77	1634.07	1664.24	1500.64	1653.97	1659.25	1611.46	1575.17	1655.95	1617.96	1505.8	1659.01	1660.49	1588.64	1637.7	1657.52	1658.33	1421.63	1662.61	1545.81	1628.49	1649.59	1628.18	1653.89	1725.44	1554.12	1537.91	1486.35
1186	3	0.2	0.1	1647.65	1699.67	1711.5	1674.67	1702.47	1711.07	1714.34	1701.64	1681.78	1666.71	1653.46	1642.11	1628.08	1614.51	1602.16	1590.73	1587.37	1689.13	1715.02	1709.87	1705.37	1700.19	1703.27	1706.93	1707.63	1649.86	1657.51	1671.26	1678.1	1676.25	1663.92	1641.58	1613.25	1588.59	1569.01	1562.04	1677.04	1702.7	1705.38	1687.47	1705.77	1717.14	1714.5	1696.91	1672.37	1647.8
1042	6	0.9	0.3	768.19	794.114	832.166	871.036	879.615	873.275	856.991	837.245	816.064	798.501	783.524	765.296	748.309	735.931	736.277	735.695	734.804	746.131	745.247	732.698	716.635	700.922	690.092	682.99	692.954	861.283	954.694	957.851	949.531	946.659	939.288	922.173	904.697	887.39	875.137	1139.67	1254.33	1229.05	1187.45	1161.04	1184.76	1166.73	1117.12	1054.17	992.892	967.86
884	6	0.1	0.3	1274.43	1281.22	1295.25	1306.33	1269.15	1317.77	1258.48	1306.67	1309.03	1277.09	1296.31	1315.12	1283.7	1306.82	1302.18	1272.02	1310.25	1289.59	1268.64	1332.03	1264.47	1264.11	1293.93	1251.11	1271.58	1282.08	1295.68	1272.76	1303.17	1308.81	1287.57	1280.35	1313.57	1292.51	1270.71	1291.06	1313.51	1319.79	1273.88	1294.57	1294.57	1316.6	1305.74	1280.91	1287.58	1293.48
1273	10	0.1	9	1560.31	1576.69	1590.57	1599.91	1587.89	1567.98	1558.26	1541.32	1499.98	1478.07	1471.92	1502.91	1528.43	1544.41	1578.33	1606.79	1609.35	1589.19	1607.91	1607.29	1604.5	1546.37	1558.24	1581.27	1600.68	1560.67	1593.73	1599.69	1517.13	1527.23	1574.89	1601.4	1609.7	1597.79	1606.33	1614.55	1568.6	1602.1	1593.4	1606.71	1602	1615.26	1619.08	1616.12	1610.13	1605.33
961	0.1	1	0.1	0	0	0	0	0	0	0	0	0	0	0	0	0	0	0	0	0	0	0	0	0	0	0	0	0	0	0	0	0	0	0	0	0	0	0	0	26.4313	69.7126	117.392	263.437	352.24	402.633	427.191	440.091	449.691	459.74
1144	2	0.2	0.1	1510.18	1492.61	1514.79	1505.8	1497.27	1512.28	1529.06	1492.43	1360.3	1474.65	1513.94	1445.83	1514.03	1469.13	1505.5	1502.92	1509.32	1493.89	1513.78	1508.87	1495.47	1444.16	1516.37	1511.18	1495.57	1479.77	1508.92	1505.89	1475.95	1507.88	1516.45	1517.08	1503.37	1509.03	1498.1	1440.25	1520.63	1471.08	1507.58	1502.02	1490.36	1519.96	1514.37	1510.04	1495.36	1510.38
616	10	0.3	0.1	1245.89	1059.44	1229.35	1238.12	1118.15	1210.41	1276.08	1189.35	1242.82	1166.94	1230.76	1166.71	1242.29	1142.34	1219.04	1183.64	1198.59	1234.92	1167.23	1253.55	1183.21	1183.04	1249.88	1130.2	1216	1210.21	1150.66	1222.6	1222.43	1154.44	1198.5	1243.67	1206.91	1198.28	1207.26	1204.64	1200.22	1193	1213.64	1211.82	1225.2	1245.81	1250.21	1215.92	1192.48	1200.6
911	0.3	0.4	10	0	0	0.468834	40.734	27.3782	0	0	0	0	0	0	0	0	0	0	0	0	0	0	0	0	0	0	0	0	1.02007	76.6323	107.762	96.8289	153.672	70.3009	57.3283	0.213275	0	0.0105933	120.097	150.851	120.489	102.272	117.03	113.49	111.302	112.802	142.662	102.029	5.8726
1006	0.9	1.5	0.3	675.947	697.499	742.307	786.818	795.271	789.232	770.791	748.053	727.328	708.356	693.079	681.068	669.283	661.348	670.875	669.048	678.908	745.852	798.712	804.11	797.951	792.454	821.462	818.192	813.561	836.854	828.651	823.162	816.788	805.029	802.628	792.073	786.409	780.67	773.073	826.465	823.548	811.022	815.356	821.885	871.371	833.003	818.166	804.445	789.166	797.636
1048	9	0.8	0.3	807.414	805.009	870.917	1251.74	1253.89	1287.6	1288.49	1034.42	819.027	808.936	808.983	808.386	808.357	807.903	808.163	809.473	806.715	792.266	764.711	681.176	583.826	488.333	477.111	631.906	686.41	817.111	847.004	810.314	814.613	1206.13	1216.31	1021.16	818.129	808.401	809.669	807.141	808.569	801.359	806.381	1049.44	1140.93	1222.29	1211.82	1004.38	818.086	806.24
1123	10	0.2	0.1	1228.92	1284.61	1320.96	1337.07	1354.32	1364.24	1355.65	1340.34	1291.88	857.135	885.229	925.755	940.441	965.133	995.792	1012.63	1032.23	1108.83	1139.28	1142.51	1139.31	1135.56	1137.77	1144.71	1154.71	1260.51	1320.73	1341.67	1242.31	1246.96	1274.14	1279.84	1275.54	1269.97	1265.82	1028.27	1094.89	1123.74	1178.59	1219.01	1322.88	1367.4	1377.44	1372.47	1361.73	1352.54
1032	9	0.8	0.2	668.951	731.961	763.699	814.943	780.873	762.506	763.471	762.195	752.115	732.784	707.371	677.389	641.169	602.759	574.961	561.078	552.12	597.883	635.4	630.922	608.503	581.252	657.858	760.019	759.575	766.823	763.177	763.052	766.416	998.448	1022.94	868.312	763.244	762.953	762.479	757.472	762.652	772.66	797.321	962.269	1066.22	1083.95	967.572	802.111	762.753	761.868
1774	0.5	0.1	0.1	1431.17	1717.06	1900.8	1900.8	1900.66	1869.01	1776.61	1651.87	1516.35	1378.37	1325.85	1325.2	1325.58	1329.69	1400.78	1516.56	1566.34	1600.23	1561.4	1434.79	1330.75	1326.03	1325.54	1324.61	1377.52	1856.33	1900.8	1900.54	1872.18	1782.73	1673.83	1542	1429.91	1344.19	1324.68	1431.09	1661.44	1887.92	1900.8	1900.8	1900.8	1897.54	1835.46	1719.13	1584.03	1439.68
1781	9	0.3	0.2	895.579	1215.47	1145.45	1230.64	1234.94	1152.47	1146.65	1072.18	964.612	841.764	734.274	669.736	638.656	866.994	1208.19	1192.44	1281.99	1152.15	1060.6	958.588	831.378	721.658	640.867	549.491	727.94	1183.41	1215.25	1226	1236.97	1206.67	1175.85	1108.19	1039.3	924.528	797.72	1014.08	1211.43	1071.48	1206.39	1210.52	1206.44	1250.51	1279.51	1215.76	1110.97	988.157
355	0.1	0.2	0.1	1760.6	1760.6	1760.6	1760.6	1760.6	1760.6	1705.71	1590.25	1524.65	1485.09	1528.82	1686.83	1760.6	1760.6	1760.6	1760.6	1760.6	1760.6	1722.62	1618.8	1537.11	1496.45	1471.08	1528.39	1636.63	1724.6	1760.6	1760.6	1760.6	1760.6	1731.28	1629.52	1555.32	1520.81	1585.83	1741.1	1760.6	1760.6	1760.6	1760.6	1760.6	1760.6	1746.34	1664.04	1633.52	1723.91
1101	10	0.8	0.2	696.325	723.855	846.294	1129.82	1132.5	1052.93	948.374	830.82	716.659	665.33	641.842	673.911	679.995	682.404	681.494	684.369	680.089	679.494	680.197	676.876	664.353	645.882	624.848	603.417	604.066	705.341	763.662	784.137	785.187	723.666	678.44	666.898	648.949	628.845	606.899	866.45	1060.49	1083.24	1085.72	1097.61	1053.02	1058.66	985.627	877.316	762.603	675.171
1023	0.3	0.2	3	1637	1637	1637	1637	1637	1637	1637	1637	1637	1637	1637	1637	1637	1637	1637	1637	1637	1637	1635.89	1620.16	1583.08	1509.54	1414.73	1387.3	1345.18	1324.84	1364.82	1378	1359.77	1372.24	1409.01	1397.92	1359.07	1298.48	1222.05	1140.64	1080.81	1048.66	1071.58	1525.56	1637	1637	1637	1637	1637	1637
1060	0.5	4	0.3	357.315	370.253	408.2	462.712	464.749	455.225	436.462	412.329	389.016	369.194	346.371	345.296	348.071	343.625	374.375	388.926	406.873	452.022	461.902	456.819	453.569	443.509	502.435	526.823	537.548	509.471	560.437	561.13	549.144	547.139	554.105	537.071	515.368	493.642	476.273	577.426	598.086	600.475	602.425	574.818	553.338	594.183	588.192	570.256	550.055	531.025
1864	1	1.5	0.2	591.295	595.652	709.66	968.652	900.293	699.149	589.625	571.252	543.821	516.061	503.556	547.929	590.033	591.833	593.506	594.017	593.097	590.312	579.963	556.315	528.456	497.548	465.613	433.382	436.506	568.312	594.751	599.943	595.824	594.521	592.769	586.567	594.047	591.045	589.417	858.077	1290.7	1404.82	1437.6	1465.85	1476.98	1437.96	1277.2	1075.9	809.392	597.535
1797	2	0.1	0.4	884.647	910.859	875.951	930.075	917.892	927.403	909.863	913.771	912.599	911.901	914.067	913.622	911.379	862.427	925.986	911.88	927.456	906.34	936.002	907.014	938.046	891.756	944.48	895.519	860.128	897.331	923.802	929.412	914.227	914.411	908.314	916.358	917.829	907.206	901.028	882.543	918.496	910.51	925.47	905.18	911.357	932.618	923.326	917.025	907.694	910.587
305	0.5	0.7	1	201.841	117.853	101.956	111.753	457.384	1423.61	1420.24	1183.98	649.02	137.338	103.027	115.453	265.124	104.004	179.822	135.12	284.643	1056.24	1405.45	1058.66	283.562	98.5728	103.075	129.692	120.821	163.441	1140.17	1424.7	1424.7	1424.7	1421.62	1192.9	471.693	102.153	106.363	116.577	203.194	214.87	219.276	188.333	105.857	107.06	146.862	136.611	103.196	107.268
968	10	8	0.1	550.506	553.972	536.385	543.379	556.608	556.75	555.662	553.756	553.088	553.533	553.141	554.811	552.549	553.667	553.921	553.737	528.191	543.155	553.917	552.744	553.598	553.434	553.39	554.301	553.41	553.133	549.278	554.84	543.716	555.172	555.669	554.845	554.591	553.095	553.319	554.241	554.184	549.934	545.792	549.784	550.331	551.383	557.259	553.658	553.266	554.046
1019	0.8	1	0.3	494.078	500.328	540.445	568.545	561.074	555.288	549.123	541.099	532.438	523.54	514.733	505.821	496.002	487.175	492.967	495.08	500.5	544.062	554.597	554.07	550.524	544.703	538.181	530.708	527.865	582.591	648.782	651.732	629.5	600.509	569.567	554.308	547.515	539.603	531.619	623.126	715.242	710.321	698.81	721.953	793.98	784.951	754.284	718.155	681.06	643.85
1302	0.9	4	0.3	553.73	552.039	551.4	550.385	546.647	543.725	536.954	510.124	499.068	513.624	526.473	549.895	544.349	545.185	548.857	552.26	551.91	551.429	555.218	554.09	553.778	553.38	553.706	548.53	551.456	552.545	554.262	553.736	550.822	548.851	539.121	528.823	522.272	517.859	515.159	513.428	515.673	528.095	547.276	555.116	553.621	552.784	549.787	546.023	542.271	539.484
1824	0.1	0.1	0.1	1363	1363	1363	1363	1363	1363	1363	1363	1363	1363	1363	1363	1363	1363	1363	1363	1363	1363	1363	1363	1361.38	1305.36	1188.21	1307.19	1363	1363	1363	1363	1363	1363	1363	1363	1363	1363	1363	1363	1363	1363	1363	1363	1363	1363	1363	1363	1363	1363
1316	0.1	0.1	0.1	0	0	0	0	0	0	0	0	0	0	0	0	8.31199	21.3219	41.8995	71.7279	135.863	200.948	270.112	268.824	267.673	265.591	274.925	273.753	268.464	262.032	256.49	247.789	237.472	223.143	211.772	201.203	192.298	184.061	177.747	170.124	159.971	152.14	145.8	138.879	132.986	130.6	128.261	124.555	120.44	117.504
1835	2	0.1	0.1	590.842	697.496	640.028	760.38	720.534	736.112	723.453	727.539	718.089	718.86	677.914	677.708	682.148	606.725	746.057	707.593	752.082	706.273	770.917	739.042	664.43	775.676	807.78	424.012	587.194	673.806	723.714	735.728	735.623	716.834	724.31	723.655	709.466	715.578	711.154	549.284	738.93	654.069	736.205	696.718	707.469	754.386	725.73	731.905	718.932	697.314
1847	0.1	0.1	0.1	1293.9	1293.9	1293.9	1293.9	1293.9	1293.9	1293.9	1293.9	1293.9	1293.9	1293.9	1293.9	1293.9	1293.9	1293.9	1293.9	1293.9	1293.9	1293.9	1293.9	1293.87	1281.63	1236.36	1283.83	1293.9	1293.9	1293.9	1293.9	1293.9	1293.9	1293.9	1293.9	1293.9	1293.9	1293.9	1293.9	1293.9	1293.9	1293.9	1293.9	1293.9	1293.9	1293.9	1293.9	1293.9	1293.9
1231	0.2	0.1	0.1	1225.31	1289	1289	1289	1289	1288.75	1281.96	1268.62	1252.4	1235.71	1218.96	1203.43	1187.47	1172.23	1157.2	1141.71	1131.72	1266.4	1289	1288.99	1287.95	1287.53	1289	1289	1289	1289	1289	1289	1289	1289	1288.48	1283.12	1271.1	1256.65	1244.04	1285.92	1289	1289	1289	1289	1289	1289	1288.99	1288.13	1282.19	1271.77
1140	0.9	1.5	0.1	588.315	569.137	562.85	542.62	522.86	512.603	511.277	510.187	509.21	509.6	509.155	510.252	509.967	509.146	509.15	508.349	507.356	506.969	505.557	504.672	503.956	502.917	501.715	501.102	499.921	498.023	497.345	493.893	493.952	498.316	504.694	503.774	502.683	501.886	501.152	499.54	500.172	514.623	514.074	512.256	511.073	510.139	508.743	507.232	505.919	553.801
1296	0.9	10	0.4	445.24	467.222	475.081	478.023	480.341	483.008	477.924	470.18	462.526	456.183	449.259	441.89	433.728	426.719	423.587	419.106	414.25	437.683	454.727	450.703	446.435	441.859	465.895	477.516	477.715	476.907	476.242	475.062	490.986	503.202	500.186	493.328	485.832	479.658	473.634	490.902	500.403	458.471	475.998	448.773	473.444	504.75	503.278	499.849	495.463	489.784
1659	1.5	0.4	0.1	670.009	666.029	709.798	748.034	755.401	752.548	741.869	729.438	716.671	702.051	686.403	669.369	653.221	658.988	673.103	674.939	703.744	729.428	728.986	724.304	750.849	754.042	749.583	743.375	745.643	815.107	942.327	955.136	910.248	883.149	879.012	868.352	855.254	841.2	827.118	864.835	884.597	884.323	883.282	885.308	885.11	884.748	882.991	876.345	865.47	858.739
1277	0.7	2	0.3	476.546	474.915	473.41	471.183	476.627	482.255	477.249	470.66	465.402	461.989	458.66	460.733	463.442	467.143	475.455	487.389	491.723	504.072	504.432	497.91	496.849	495.337	493.558	491.104	488.058	485.201	483.524	482.185	483.964	485.567	483.045	478.801	474.735	470.982	467.661	464.191	462.798	467.915	477.746	487.205	489.699	489.984	487.607	483.876	479.818	476.436
1021	0.1	0.1	0.1	1221.15	1221.4	1221.4	1221.4	1221.4	1221.4	1221.4	1221.4	1221.39	1221.22	1219.94	1218.16	1212.21	1204.06	1195.13	1181.67	1167.78	1156.66	1142.14	1125.41	1111.72	1098.13	1174.54	1220.84	1221.4	1221.4	1221.4	1221.4	1221.4	1221.4	1221.4	1221.4	1221.4	1221.4	1221.4	1221.4	1220.54	1221.29	1221.4	1221.4	1221.4	1221.4	1221.4	1221.4	1221.4	1221.4
1280	0.7	0.1	0.3	1117.54	1022.31	920.446	840.469	817.58	796.039	751.044	702.513	810.427	1147.52	1142.94	1144.09	1160.19	1162.56	1169.99	1168.59	1127.25	1066.08	981.987	885.183	845.848	849.599	854.962	846.033	846.068	846.075	846.366	845.519	845.363	843.531	843.469	831.921	820.531	813.428	809.723	808.091	806.86	817.914	832.471	843.485	838.614	829.887	810.102	784.209	758.895	740.35
1120	8	0.1	0.1	800.653	804.25	805.895	803.212	805.813	806.682	803.635	800.842	799.204	798.972	798.954	799.797	799.416	798.557	797.996	796.092	794.003	791.518	786.635	782.956	780.627	779.507	778.981	777.883	776.632	776.489	776.205	775.915	788.017	803.337	805.207	805.067	804.943	805.253	804.875	804.888	805.187	804.891	804.76	805.024	805.589	804.698	805.974	804.426	802.852	794.355
182	4	0.1	0.4	733.477	745.136	760.885	756.055	761.162	757.009	734.735	721.905	719.442	717.162	714.257	713.771	711.539	649.617	656.83	731.449	749.864	721.107	570.14	504.466	499.069	496.878	555.241	738.481	760.521	754.774	758.433	742.327	757.319	758.503	750.726	739.846	749.94	759.902	706.978	739.099	733.696	745.095	759.083	748.319	755.204	757.708	759.689	760.947	753.864	762.731
7311	1.5	0.1	0.1	732.652	731.1	732.183	733.391	733.046	733.096	732.818	732.908	731.394	731.131	730.935	730.381	728.932	726.904	724.493	721.805	719.46	721.16	729.987	732.947	733.226	732.871	726.198	724.79	731.806	728.56	732.307	732.956	731.977	738.272	733.246	732.812	733.045	732.973	732.926	732.924	732.17	729.202	733.014	745.007	733.616	732.526	732.845	733.098	732.766	733.028
1755	1.5	1	0.5	190.016	225.343	314.473	400.58	398.117	385.35	363.283	334.145	302.073	268.742	234.002	193.721	167.479	227.558	280.934	293.984	301.597	376.391	391.465	367.002	339.121	308.261	273.913	270.036	384.119	481.207	514.986	488.728	450.663	404.907	377.53	349.994	365.398	351.977	320.759	318.766	383.352	418.396	402.591	407.936	530.819	644.549	596.523	520.098	442.302	387.048
1152	0.5	0.3	0.1	0	0	0	0	0	0	0	0	0	0	0	0	0	0	0	0	0	0	0	0	0	0	0	0	0	0	0	0	0	0	0	0	0	0	0	0	0	0	0	0	0	0	0	0	0	0
1192	2	0.2	0.1	636.911	638.079	640.409	641.29	641.702	641.305	641.413	640.437	641.834	639.745	641.297	639.603	640.879	640.859	639.886	639.918	639.613	637.26	641.73	640.845	641.376	640.093	640.212	640.366	639.605	639.206	640.606	640.466	640.538	639.096	646.074	633.29	629.541	628.788	633.212	626.048	642.709	635.474	643.108	641.376	641.482	640.871	641.281	641.415	639.671	641.238
541	10	0.1	2	640.458	578.46	583.399	584.665	429.097	621.063	622.563	600.007	625.051	607.619	596.446	611.898	620.51	622.937	621.557	403.16	137.784	139.961	87.5831	87.3246	84.2235	77.8222	70.7621	63.0421	54.9482	45.5827	34.8161	26.705	271.563	619.483	618.325	619.586	595.87	615.449	630.029	639.402	642.791	641.605	637.084	631.044	569.821	621.107	623.763	598.498	619.215	632.48
1822	2	0.2	0.1	413.907	503.352	407.224	518.134	500.965	501.517	491.558	492.787	499.226	506.856	494.754	463.945	488.049	406.954	504.718	473.111	521.894	475.897	503.235	462.314	371.835	347.391	346.541	381.903	408.24	466.971	506.065	502.711	494.192	491.794	491.286	490.604	513.595	476.791	476.218	426.08	505.031	447.058	490.295	500.724	498.926	512.909	496.676	500.252	494.979	549.943
972	1.5	6	0.1	350.312	353.388	352.582	469.629	377.042	356.359	356.578	356.434	356.819	356.639	354.29	360.346	350.442	351.482	351.082	350.299	317.594	307.05	337.972	356.46	353.448	353.524	352.757	351.375	350.58	349.157	339.565	348.728	355.7	354.945	356.433	356.79	355.338	355.671	355.73	354.238	351.589	352.677	346.868	351.818	357.021	355.795	356.476	355.372	357.967	354.566
613	1.5	0.1	1	614.81	611.03	614.728	640.008	876.823	889.79	732.986	595.177	576.196	591.937	614.421	615.02	614.98	614.579	613.455	614.101	615.514	615.615	573.735	512.53	467.809	448.973	446.342	443.658	440.81	455.898	567.417	614.111	631.549	643.647	583.862	521.597	484.178	469.809	471.657	506.112	545.374	594.632	611.487	616.583	655.249	799.698	642.795	571.983	530.188	512.603
1086	0.2	0.1	0.1	429.873	427.21	424.471	421.261	417.002	409.639	398.449	386.773	376.883	367.564	362.448	359.675	356.799	353.954	351.267	348.037	343.744	336.972	327.018	317.128	308.516	301.458	297.857	295.382	292.933	290.646	288.36	285.434	280.333	271.04	259.245	248.767	240.888	233.933	230.936	229.242	227.967	234.113	244.43	254.137	251.128	242.1	230.448	219.657	211.952	206.645
1295	0.2	0.1	0.1	834.553	869.514	872	872	871.993	871.1	863.409	851.961	839.927	831.731	822.862	817.643	816.15	828.579	833.841	830.622	833.146	862.344	871.612	867.692	867.146	863.671	871.997	872	872	872	872	871.997	872	872	871.699	868.974	861.207	857.288	862.954	872	872	872	872	872	872	871.969	871.348	870.351	869.9	868.184
1139	0.8	0.2	0.1	609.697	595.301	589.986	586.668	582.795	577.806	569.271	561.069	557.537	591.492	594.731	611.963	610.498	600.317	618.693	617.622	610.314	602.846	592.375	587.625	585.049	634.018	676.397	672.305	663.595	659.013	658.08	652.366	669.826	720.545	754.88	750.372	740.691	730.242	718.916	708.618	706.835	707.978	707.029	702.685	694.094	682.893	667.288	648.743	630.543	613.748
1862	4	2	0.2	285.46	319.062	383.751	468.73	312.311	315.818	313.31	322.727	309.185	294.899	307.818	314.618	301.493	281.116	315.345	308.525	312.194	306.386	314.267	290.799	256.699	213.237	167.005	115.487	231.385	371.314	386.551	300.218	307.212	317.987	306.751	302.606	288.648	262.856	260.592	297.73	330.548	297.821	315.574	317.734	315.649	318.541	316.888	320.146	309.189	288.147
629	3	0.3	0.1	429.882	398.919	457.4	445.803	409.959	440.876	468.701	452.835	444.581	435.704	438.674	442.555	440.053	445.54	443.398	444.543	437.302	440.977	438.168	444.704	440.447	440.153	444.69	430.325	433.22	443.807	432.458	448.241	435.01	440.038	436.908	424.595	444.632	441.184	433.838	427.205	453.513	429.639	424.623	437.424	440.764	448.101	432.15	417.2	447.483	446.998
1000	7	1.5	0.1	304.272	312.425	318.913	318.669	319.271	319.113	318.924	319.093	318.031	312.682	295.753	297.592	303.701	315.244	318.793	318.286	316.021	332.858	327.705	319.266	319.127	316.872	315.473	317.803	317.245	331.697	327.544	318.41	318.591	315.87	319.355	316.918	314.405	318.578	316.129	361.587	342.251	318.601	318.702	334.399	342.734	319.714	319.084	318.696	319.192	320.757
7306	0.1	0.1	0.1	789.7	789.7	789.7	789.7	789.7	789.7	789.7	789.7	789.7	789.7	789.7	789.7	789.7	789.7	789.7	789.7	789.7	789.7	789.7	789.7	789.322	755.481	675.066	775.232	789.7	789.7	789.7	789.7	789.7	789.7	789.7	789.7	789.7	789.7	789.7	789.7	789.7	789.7	789.7	789.7	789.7	789.7	789.7	789.7	789.7	789.7
991	10	0.6	1.5	69.4085	73.5575	86.141	131.586	112.241	75.5706	75.1327	75.1965	75.2083	75.163	73.4185	74.4752	76.3585	73.6307	72.561	70.0441	64.4806	73.8682	75.0773	74.6396	74.5593	73.3196	68.4449	88.1741	73.7985	74.7511	76.0035	75.5225	73.3088	90.255	95.629	74.8697	75.0205	75.1161	75.1329	74.9629	74.011	69.1286	72.9664	171.389	205.613	168.133	119.188	76.2273	75.0833	75.0067
7317	0.2	0.1	0.1	713.273	750	750	750	750	749.887	746.119	735.728	721.945	706.749	690.133	673.899	656.637	700.533	741.212	750	749.159	745.159	733.645	717.339	699.179	678.575	659.618	648.186	740.06	750	750	750	749.968	746.932	737.89	728.69	717.683	704.962	691.384	746.559	750	750	750	750	750	750	749.733	745.552	737.043	726.358
998	0.7	0.8	0.1	430.328	468.008	464.715	610.552	750.3	746.938	670.35	550.606	482.884	468.301	462.301	446.22	419.326	386.324	357.206	341.063	302.435	261.092	167.927	77.6109	65.2531	70.36	99.0515	124.12	143.515	160.2	184.06	200.493	184.453	129.615	82.2472	74.5764	105.726	175.493	252.802	297.092	297.66	297.381	297.177	354.628	422.055	380.453	296.496	274.72	293.035	297.736
1716	1.5	0.2	0.1	441.66	485.428	521.602	521.515	518.603	507.396	498.085	480.716	461.362	443.245	427.932	418.496	415.972	469.259	508.772	510.279	496.428	521.061	519.084	513.574	503.741	489.669	477.734	467.446	518.311	579.61	597.347	521.551	513.374	510.352	504.906	490.555	477.726	464.885	450.719	543.019	596.167	519.252	504.424	520.665	653.186	600.354	516.708	508.495	498.963	493.932
1896	4	0.3	1	463.575	481.371	470.547	494.272	478.956	493.32	483.748	489.284	484.79	476.821	473.365	483.88	498.863	277.261	262.964	211.263	110.356	68.7828	68.7198	67.8213	68.8692	68.0858	69.1108	66.7844	80.1573	337.274	491.673	459.092	478.995	479.359	485.126	485.247	482.275	498.774	488.084	452.869	493.186	473.942	470.326	488.892	484.881	493.338	483.839	472.201	472.342	473.966
1883	0.1	0.1	0.1	727.8	727.8	727.8	727.8	727.8	727.8	727.8	727.374	724.085	725.892	726.77	727.781	727.8	727.8	727.8	727.8	727.697	726.074	718.801	713.592	702.145	688.801	679.099	671.027	727.8	727.8	727.8	727.8	727.8	727.8	727.77	727.011	723.191	720.127	716.44	723.8	727.8	727.8	727.8	727.8	727.8	727.8	727.8	727.379	727.368	724.3
1285	0.8	3	0.2	276.04	275.563	276.034	271.069	269.929	275.147	276.339	276.181	275.837	275.782	275.241	259.729	259.782	269.852	273.883	274.98	275.607	283.366	286.494	275.548	275.963	275.584	274.8	275.975	275.809	275.421	275.887	276.033	272.549	274.913	276.516	276.394	275.63	274.617	273.833	273.059	274.131	271.484	275.307	276.02	274.85	275.969	276.01	275.744	275.933	275.995
1266	2	0.2	0.1	475.013	479.539	480.245	480.384	478.921	480.719	480.904	480.321	478.95	478.289	477.167	476.112	473.254	470.639	467.612	463.581	461.241	460.445	458.897	455.877	456.171	456.259	456.725	456.361	456.08	456.326	456.737	458.165	462.445	465.581	466.133	464.381	461.366	459.005	458.272	473.74	480.601	481.84	488.27	480.725	480.691	480.707	480.755	480.604	480.432	479.695
1176	1.5	0.2	0.1	636.719	543.026	475.49	461.494	444.415	437.418	444.124	459.473	478.651	640.487	614.79	669.187	631.717	553.011	486.418	478.747	478.688	478.266	478.581	478.736	478.295	476.895	479.09	475.781	474.243	478.559	478.299	477.962	479.545	505.842	544.971	515.291	480.822	478.857	478.3	477.9	476.192	478.482	478.681	478.735	478.55	477.881	478.357	478.587	478.788	478.396
924	2	1	0.5	256.146	248.521	252.693	270.96	266.105	265.066	259.939	247.449	243.525	236.25	230.185	243.31	262.033	263.934	271.942	269.646	268.549	263.896	281.068	324.536	299.501	270.685	258.504	252.551	245.581	254.153	333.35	375.4	375.248	390.94	396.495	400.123	380.902	356.505	337.264	357.074	354.713	350.48	356.322	407.451	402.212	375.39	340.028	298.899	268.062	254.047
758	8	0.4	0.1	458.14	459.643	456.284	458.303	460.385	455.678	447.03	445.945	461.668	458.383	455.917	460.604	453.998	466.217	466.598	454.229	458.234	460.623	449.817	426.07	413.853	426.917	426.931	428.9	436.54	441.162	444.91	452.156	445.103	438.807	445.184	447.491	447.492	455.852	457.585	458.61	456.073	463.662	455.597	463.962	459.521	459.75	436.988	423.569	421.023	437.388
1257	0.1	10	0.1	0	0	0	0	0	0	0	0	0	0	0	0	0	0	0	0	0	0	0	0	0	0	0	0	0	0	0	0	0	0	0	0	0	0	0	0	0	0	0	0	0	0	0	0	0	0
895	0.3	0.1	0.1	666.1	666.1	666.1	666.1	666.1	666.1	666.1	666.1	666.1	666.1	666.1	666.1	666.1	666.1	666.1	666.1	666.1	666.1	666.1	666.1	666.1	666.1	666.1	666.1	666.1	666.1	666.1	666.1	666.1	666.1	666.1	666.1	666.1	666.1	666.1	666.1	666.1	666.1	666.1	666.1	666.1	666.1	666.1	666.1	666.1	666.1
1317	3	4	0.1	256.708	255.589	247.731	239.624	238.225	256.075	248.865	249.36	259.023	258.84	257.465	257.118	257.741	259.079	258.983	254.249	258.629	243.242	259.606	258.016	257.193	250.569	258.804	258.079	258.464	259.737	256.227	254.997	258.222	255.711	248.337	242.102	235.847	232.433	234.111	233.831	232.417	231.128	228.161	222.267	213.429	206.063	203.532	199.258	194.049	194.08
1242	0.9	0.1	0.1	618.265	578.394	533.18	490.4	449.532	423.714	383.919	337.622	344.405	640.1	639.22	635.347	631.783	625.342	613.08	593.538	566.157	519.028	456.099	429.665	440.26	447.461	447.249	447.311	447.027	447.511	446.517	441.075	429.986	399.507	345.145	293.074	258.611	244.2	236.311	232.187	319.155	453.553	485.052	462.086	441.75	419.372	368.476	308.971	272.325	257.166
107	5	0.3	0.7	386.526	414.392	395.551	412.127	425.665	418.908	400.137	375.106	350.951	328.651	307.067	293.498	317.575	373.553	415.531	403.415	402.237	389.582	367.194	339.578	313.665	291.611	272.565	386.445	412.613	410.694	422.254	413.182	418.846	418.149	406.12	386.877	367.05	348.343	328.124	372.53	405.38	402.243	417.627	389.532	420.146	424.443	413.76	395.546	376.073	356.529
1841	3	0.1	0.2	384.3	398.849	432.631	429.435	401.131	403.081	403.623	402.912	400.715	403.799	399.901	370.474	373.507	382.141	397.039	398.02	403.156	402.995	402.326	402.762	401.062	396.423	391.328	389.729	365.776	414.345	404.737	400.309	402.434	403.738	402.082	405.379	406.563	404.746	398.714	380.818	403.559	395.888	394.051	400.837	401.364	403.87	403.108	402.713	404.371	407.122
907	0.3	0.7	5	18.6209	36.0145	39.8774	37.8059	39.4689	37.7769	29.9173	10.682	0	0	0	0	0	0	0.00515719	0.153342	1.2675	0	0	0	0	0	0	0	0	2.07502	30.4097	39.6964	35.7576	37.4452	38.7157	39.4101	41.863	34.0075	36.4593	36.7027	34.7325	28.3536	36.4925	35.1895	37.7378	41.2449	37.8013	39.8293	39.7148	35.4178
80	0.3	0.8	0.4	507.004	559.388	560.868	560.527	553.908	540.887	497.346	416.567	244.229	139.89	79.4808	231.043	327.755	275.866	300.577	295.349	246.508	216.73	202.183	142.448	70.0073	53.1965	73.5511	371.92	540.585	559.604	561.168	561.155	560.193	542.389	503.955	435.148	275.726	169.905	196.804	340.12	546.895	560.585	560.856	560.525	555.583	553.723	553.767	503.401	421.64	287.211
1236	0.2	0.1	2	228.647	228.911	228.909	228.386	227.387	221.222	195.245	155.949	126.061	100.046	75.9795	53.2623	52.6663	52.9497	52.8297	52.9752	52.9758	52.9524	52.9726	52.9981	53.0329	52.9211	55.3366	52.9705	52.9752	52.9742	52.936	52.9845	52.9589	52.7803	53.011	52.9523	52.955	53.0007	53.0256	52.9659	52.9652	52.9135	52.8924	52.8674	52.9026	52.9666	52.9957	53.0137	53.0395	53.1252
981	3	0.1	0.2	367.312	366.649	367.801	462.177	392.796	367.456	367.549	367.373	367.615	367.468	367.57	367.586	367.527	368.314	366.915	367.274	365.206	367.795	368.131	366.725	363.927	364.279	364.789	366.259	368.332	353.467	350.035	366.48	367.364	365	366.021	367.472	367.584	367.633	367.597	367.259	367.48	360.706	365.41	368.273	367.634	368.253	366.816	367.917	367.316	367.341
1093	0.3	4	10	0	0	0	0	0	0	0	0	0	0	0	0	0	0	0.0180998	0	0.0262519	18.6649	26.8818	7.22563	0	0	0	0	0	30.7886	27.3157	28.6968	7.98522	28.3251	38.1671	17.8124	0.350177	0	0	5.35977	31.6959	26.4233	25.6776	17.5375	12.5843	27.5076	11.4714	0	0	0
1709	4	0.5	0.1	223.966	271.376	337.145	344.584	346.58	339.979	328.361	310.889	289.171	260.849	228.56	203.396	201.625	215.019	253.091	286.869	311.836	312.968	313.532	301.034	278.029	251.756	227.21	211.317	234.152	335.439	344.791	349.69	344.201	346.586	330.468	318.59	297.179	267.951	235.637	218.064	217.909	239.835	286.562	323.871	323.323	345.151	342.132	324.812	297.966	265.843
1017	7	1	1.5	32.1721	36.2571	51.7095	50.3426	49.3259	49.4678	49.9094	48.9583	46.4597	42.6427	37.941	32.083	26.6265	24.7478	35.5779	41.0621	39.1677	48.1712	49.1203	49.701	47.4695	45.1841	42.3026	39.6228	43.9316	113.709	211.927	216.052	174.051	102.701	52.2231	47.2585	43.1297	45.5101	44.5266	251.183	319.259	291.524	258.021	260.033	339.735	320.055	265.484	202.775	120.841	55.1912
1194	2	0.2	0.1	352.362	352.672	352.878	352.812	352.886	351.842	349.138	344.359	339.867	339.789	342.997	347.07	352.037	352.801	352.838	352.87	352.889	352.714	351.191	348.303	345.946	365.634	393.724	366.314	352.79	352.764	352.922	352.908	363.157	363.76	353.196	352.999	352.832	352.954	352.851	352.915	352.793	352.776	352.852	352.709	353.096	352.462	351.81	349.654	347.062	344.552
[truncated: 434 more columns]

## Sheet: Outflow(WG inflow-With Demand)
grand_id	p1	p2	p3	1980-01	1980-02	1980-03	1980-04	1980-05	1980-06	1980-07	1980-08	1980-09	1980-10	1980-11	1980-12	1981-01	1981-02	1981-03	1981-04	1981-05	1981-06	1981-07	1981-08	1981-09	1981-10	1981-11	1981-12	1982-01	1982-02	1982-03	1982-04	1982-05	1982-06	1982-07	1982-08	1982-09	1982-10	1982-11	1982-12	1983-01	1983-02	1983-03	1983-04	1983-05	1983-06	1983-07	1983-08	1983-09	1983-10
610	0.4	0.5	0.1	1420.38	4583.12	3663.81	2124	3935.16	4905.39	2052.37	1500.26	1484.12	1556.25	1510.86	1555.91	1541.14	1378.83	1864.78	1614.59	1428.37	1316.6	1186.8	1119.24	1101.78	1136.93	1096.67	1130.92	1154.19	1165.2	1135.79	1055.27	1170.26	1161.85	1159.07	1124.99	1082.79	1117.62	1078.29	1236.51	1102.68	1068.89	1220.27	1677.29	1155.93	1148.79	1259.08	1189.89	1091.74	1322.77
1294	1.5	0.1	0.1	22.6628	27.7964	29.1918	29.6837	124.96	22.6054	27.709	19.0413	54.7988	29.8766	37.5752	77.9314	87.0272	92.8631	272.361	188.942	174.448	510.187	247.39	174.472	147.183	208.743	184.133	160.517	151.839	151.593	147.356	83.3543	103.702	76.5306	56.1398	69.2012	54.8138	56.4354	56.0314	76.8517	88.5356	188.979	225.007	92.5537	99.7756	90.2344	66.556	54.8291	54.1618	55.8606
1247	10	0.4	0.2	100.291	87.5792	75.3188	79.9913	108.621	63.593	69.599	77.0322	155.837	74.0145	115.052	138.704	77.841	77.7764	249.521	83.2268	81.344	89.8161	94.3427	89.719	86.3939	923.026	195.066	158.54	166.145	146.827	161.927	150.781	542.087	282.844	182.438	86.3468	152.178	87.6842	85.8163	93.7043	94.2547	201.192	92.7998	144.844	87.3671	91.8143	82.8218	87.9644	84.9488	88.5676
1186	1.5	3	0.1	246.482	167.558	133.74	138.853	89.609	51.7834	22.3801	11.7609	25.5528	13.6354	13.139	26.7487	13.0382	25.0566	14.4263	25.5964	52.5766	158.337	43.0223	24.0068	24.4381	39.9259	43.3759	24.9047	41.7184	159.942	10.8239	12.1172	38.5239	35.0254	11.6211	11.9273	11.5727	13.3622	14.3075	357.254	57.2443	309.532	170.642	8.61924	51.5098	35.0504	23.1606	11.6896	11.6657	12.9648
355	0.1	0.2	0.1	156.851	131.712	191.812	601.144	727.867	202.397	45.1748	49.9014	40.8559	65.0763	60.739	61.7889	157.411	170.486	247.067	512.332	1131.98	238.812	48.2315	50.7802	45.0813	39.4106	64.9115	51.0676	40.9689	89.5129	212.622	394.175	603.951	341.655	45.7946	51.7082	41.9219	58.8125	62.8051	169.661	283.709	305.951	364.167	850.019	1500.75	535.933	64.6424	51.5091	62.0485	112.395
1302	9	4	0.3	16.5252	14.1283	16.2101	13.017	19.9998	6.73592	15.4225	42.6795	23.766	16.3735	21.5656	22.3391	39.0412	32.1727	74.348	44.2927	31.273	254.799	36.6636	22.2426	21.6529	25.2258	23.9989	23.1373	16.2845	16.0964	14.2702	14.0387	21.1759	8.7416	23.6646	17.3078	16.3551	16.3583	16.8144	18.3414	18.7817	19.8719	39.4871	18.487	17.0425	15.0381	17.0136	16.6212	16.0628	16.5738
1231	0.2	0.1	0.1	140.708	93.7448	62.4553	52.9472	46.0846	28.5358	28.1252	27.1486	26.5877	28.8371	27.9739	28.8051	28.1492	25.5304	29.0039	27.7119	38.751	129.094	53.6233	31.5187	28.0337	39.8942	83.205	57.8134	50.4787	62.0558	54.0874	42.249	45.9281	37.6955	28.597	27.2135	26.4854	28.7601	32.1105	243.746	72.075	163.423	91.83	65.0737	54.6641	46.4576	34.2597	27.8461	26.8283	28.3224
1140	0.9	1.5	0.1	18.6893	11.4257	3.18989	28.6103	19.209	5.9847	0.61744	0.486422	0.862797	0.309739	1.71986	0.761068	0.759929	0.423007	1.02739	0.526409	1.09853	0.819447	0.612225	0.468046	0.217835	1.73743	0.18913	0.614373	1.75958	0.90421	0.184085	3.23625	2.12425	0.770541	0.189304	0.47595	0.213564	0.18387	1.28447	1.74891	1.80408	5.41449	5.84068	0.310757	0.657282	0.728569	0.647837	0.496348	0.207734	14.3117
1296	0.6	9	0.4	23.8734	7.9196	11.3122	10.8315	14.2508	9.35348	10.8976	11.5774	11.1207	11.3539	11.0738	12.2627	13.1001	13.6924	11.275	10.5708	11.3669	20.4552	8.60192	10.8965	10.8468	17.9301	10.354	9.34402	12.1058	11.1433	12.0031	12.7714	15.2702	9.0347	10.9817	11.4675	11.4016	11.703	13.5578	16.164	33.9579	85.556	97.1983	7.59771	16.0499	11.6663	11.1009	11.3907	11.1415	11.7494
1277	0.7	1.5	0.3	26.8072	25.6584	23.1506	22.3488	33.9512	6.96619	4.64737	4.57071	5.51121	3.56113	7.31725	5.30781	4.87177	4.40498	6.36648	3.83783	6.72824	27.6736	17.2026	7.4517	4.25988	4.48069	4.33372	4.20643	5.19137	5.45376	4.43608	4.90174	6.0659	3.52623	4.34989	4.34445	4.13528	4.24793	4.50138	6.98489	6.031	4.66791	5.52997	3.17602	4.65862	4.08177	4.41912	4.40039	4.15433	4.2984
1280	0.7	0.1	0.2	76.4035	97.3388	99.3671	34.1981	18.0926	10.7761	12.415	13.9937	125.087	82.313	107.163	123.052	112.63	93.4873	123.898	100.485	107.244	102.298	103.707	87.9136	15.9643	105.626	59.3016	29.3714	30.3128	36.2484	23.9268	15.8535	28.9071	24.326	13.1574	13.5025	13.2089	13.6118	13.1776	13.615	14.4892	13.5724	14.169	12.3394	13.5183	13.7632	13.5102	12.8048	12.8631	13.8012
182	0.5	1	0.2	290.063	371.966	216.613	137.349	115.741	109.223	114.977	166.797	180.694	84.7695	33.6906	36.616	44.4426	108.167	193.007	128.225	35.9573	30.361	32.0958	30.845	29.8305	32.7921	103.626	208.557	90.9596	363.166	408.012	488.086	159.927	120.691	103.482	116.527	110.452	156.566	392.628	150.209	319.576	511.25	695.356	290.288	149.177	121.165	108.997	119.131	108.762	156.753
1152	0.5	0.3	0.3	0	0	0	0	0	0	0	0	0	0	0	0	0	0	0	0	0	0	0	0	0	0	0	0	0	0	0	0	0	0	0	0	0	0	0	0	0	0	0	0	0	0	0	0	0	0
1295	0.2	0.1	0.1	26.4285	47.1227	41.284	26.133	33.0749	16.0221	17.5787	17.1041	16.5856	17.0241	19.0101	17.5616	20.8437	15.4552	15.6651	15.6454	19.5701	28.213	27.5594	17.1586	16.5687	19.5535	87.8022	26.9278	35.7306	28.3133	35.3823	77.8018	83.0666	23.771	17.3753	17.2756	16.2549	18.2895	107.724	138.006	69.0335	140.376	119.273	28.125	105.833	23.1757	21.3782	20.9295	17.0267	16.2211
629	2	0.1	0.5	1610.35	4331.57	3936.57	2053.14	3401.25	4522.36	2221.16	1649.47	1687.17	1825.57	1683.83	1693.43	1700.93	1610.51	1754.28	1586.65	1651.24	1677.12	1579.39	1662.96	1552.95	1559.85	1555.65	1568.22	1716.82	1444.28	1576.02	1586.59	1456.57	1490.66	1568.17	1419.7	1237	1414.17	1271.8	1516.85	1382.34	1183.9	1631.78	1209.26	1283.52	1177.11	1305.1	1585.73	1239	1543.45
1266	0.2	0.1	0.1	10.3474	12.6236	15.6689	13.6658	23.9405	9.49972	7.53837	7.40031	7.00129	7.24949	7.02538	7.27361	7.29035	6.83908	8.1706	7.48288	7.65466	8.23136	7.89675	7.33481	6.98693	7.31993	7.45461	7.52878	7.49655	7.04258	7.65327	7.5359	8.4099	6.98384	7.2979	7.15875	6.83542	7.07655	6.98585	10.3024	7.59139	71.6803	45.8434	17.6407	47.2334	11.5372	9.53904	10.3428	7.16389	7.34783
1176	1	0.1	0.1	5.69904	7.37996	4.58038	7.67067	11.9156	7.18674	7.20418	15.8677	80.5831	51.8709	172.78	133.917	63.9259	63.664	80.2304	64.4376	59.4178	27.4567	29.6668	20.3561	11.8123	58.7356	15.1167	9.68332	19.4539	16.9585	14.2523	8.95772	91.9206	70.8478	53.9815	66.8765	59.9945	58.3947	57.083	20.3133	38.4913	66.1269	39.6029	15.9586	21.0782	32.7058	34.052	26.5973	12.7031	84.4043
758	10	7	0.6	105.835	76.4818	82.3648	58.6304	60.0127	55.2143	59.9887	60.3785	59.2351	61.1815	59.6653	61.7889	61.574	55.6542	61.1605	59.6469	61.0431	48.3759	61.3847	58.7971	56.9008	62.6322	56.7681	58.0637	57.9406	51.0289	56.6576	54.9143	56.9724	61.1034	57.4313	56.6168	55.3763	61.6007	60.0464	82.9102	61.6992	75.5658	60.7993	58.3608	59.1944	58.0492	61.2095	59.3707	57.5881	61.1815
1242	0.9	0.1	0.1	32.2328	43.3776	43.3906	33.5822	34.811	5.42845	5.76148	5.05193	49.2875	199.534	46.5038	49.6991	49.0041	42.9997	46.7278	46.0253	41.2321	46.5762	35.4387	8.0748	19.9818	8.69564	9.2195	9.29671	9.94081	6.04813	4.37136	3.27096	4.67127	5.00758	5.08197	4.71217	4.17315	3.73963	3.96098	8.85668	8.10167	22.4516	27.4199	53.5859	9.52102	4.86659	5.07002	4.28841	3.88001	10.5829
1236	0.8	0.5	3	7.07956	10.0235	45.4782	40.598	44.3438	26.2416	3.37389	2.98619	3.18883	3.58843	3.47907	7.08014	3.58179	3.25969	4.56395	7.79419	8.555	7.80737	6.3989	5.20991	3.17639	36.886	12.3305	11.8657	9.68877	10.2486	12.6272	10.6385	12.6501	22.4726	9.09133	10.5598	9.02411	7.24127	5.24815	5.49023	5.77591	4.97326	9.0502	9.60099	8.76458	8.46192	5.31105	5.16254	3.10446	3.30293
1194	2	0.1	0.1	9.24332	14.3715	15.1179	12.645	10.5926	3.70181	3.91378	3.84044	3.71973	4.66059	10.4593	11.6602	10.4071	10.0501	9.12298	10.6815	10.6271	6.11008	6.2228	3.78774	3.5962	95.571	56.6764	44.5213	27.134	22.502	25.9843	19.016	72.5482	56.6375	26.0381	19.5891	12.5412	12.4797	10.1794	10.4719	8.31836	8.22754	11.0923	8.37756	8.27802	8.34164	3.74391	3.68992	3.51086	3.65553
[truncated: 434 more columns]

## Sheet: Storage(WG inflow-With Demand)
grand_id	p1	p2	p3	1980-01	1980-02	1980-03	1980-04	1980-05	1980-06	1980-07	1980-08	1980-09	1980-10	1980-11	1980-12	1981-01	1981-02	1981-03	1981-04	1981-05	1981-06	1981-07	1981-08	1981-09	1981-10	1981-11	1981-12	1982-01	1982-02	1982-03	1982-04	1982-05	1982-06	1982-07	1982-08	1982-09	1982-10	1982-11	1982-12	1983-01	1983-02	1983-03	1983-04	1983-05	1983-06	1983-07	1983-08	1983-09	1983-10
610	0.4	0.5	0.1	36181.1	36700	36700	36700	36700	36700	36700	36700	36700	36700	36700	36700	36700	36700	36700	36700	36700	36700	36681.6	36490.5	36238.2	36012.3	35808.5	35618.1	35440	35478.4	35952.8	36361.5	36230.2	35878.3	35498.7	35125.1	34810.1	34535.5	34299.6	34227.9	34470.4	34907.7	35805.8	36676	36676.7	36434.4	36098.9	36141.3	36424.4	36670.6
1294	1.5	0.1	0.1	2777.34	2777.69	2774.39	2771.77	2737.41	2717.59	2713.26	2698.81	2676.72	2694.07	2716.44	2771.54	2772.98	2775.53	2772.08	2776.68	2775.14	2797.22	2786.68	2775.23	2775.75	2773.51	2775.53	2775.12	2775.15	2774.98	2775.95	2776.42	2775.51	2776.13	2775.46	2774.87	2775.32	2775.42	2775.08	2773.97	2772.58	2771.69	2774.67	2776.5	2773.72	2775.06	2775.38	2776.16	2774.89	2775.73
1247	10	0.4	0.2	1554.84	1518.96	1497.84	1464.51	1431.48	1415.58	1374.04	1313.39	1251.61	1513.82	1556.33	1726.03	1796.21	1805.3	1729.7	1759.98	1778.05	1775.54	1761.9	1747.95	1735.05	1748.06	1788.01	1773.27	1782.82	1779.34	1774.84	1789.83	1633.79	1746.74	1783.12	1788.58	1759.21	1768.61	1775.52	1777.73	1786.5	1738.34	1760.63	1775.56	1773.12	1785.14	1785.17	1760.86	1729.11	1695.09
1186	1.5	3	0.1	968.012	981.296	975.932	946.906	980.345	979.949	980.392	983.265	982.275	974.311	980.435	977.963	979.711	983.701	978.157	978.064	978.837	973.433	980.913	980.783	978.769	978.735	977.81	979.044	978.638	916.288	938.174	970.54	978.425	981.522	974.917	972.384	963.085	957.36	956.982	959.202	982.177	928.785	966.347	966.055	979.26	980.673	979.75	982.3	977.347	971.91
355	0.1	0.2	0.1	1760.6	1760.6	1760.6	1760.6	1760.6	1760.6	1709.01	1601.12	1536.37	1497.36	1542.65	1701.56	1760.6	1760.6	1760.6	1760.6	1760.6	1760.6	1722.47	1622.71	1544.78	1505.32	1481.96	1541.45	1652.02	1737.83	1760.6	1760.6	1760.6	1760.6	1731.03	1631.74	1560.02	1526.43	1593.75	1745.07	1760.6	1760.6	1760.6	1760.6	1760.6	1760.6	1746.49	1669.56	1643.37	1730.88
1302	9	4	0.3	553.722	554.502	553.922	552.912	549.12	545.798	538.086	510.24	498.757	513.285	526.204	550.042	551.794	552.366	549.019	552.754	552.714	556.37	555.038	553.385	553.296	552.861	551.932	552.255	551.593	552.684	554.388	553.815	550.804	548.456	538.068	527.16	520.28	515.804	513.118	511.41	513.672	526.105	548.578	554.823	555.173	554.05	550.663	546.475	542.461	539.611
1231	0.2	0.1	0.1	1289	1289	1289	1289	1289	1288.46	1280.47	1266.52	1250.28	1233.59	1216.84	1201.31	1185.36	1170.13	1155.09	1139.45	1129.29	1265.48	1289	1288.99	1287.94	1287.51	1289	1289	1289	1289	1289	1289	1289	1289	1288.35	1282.74	1270.71	1256.27	1243.65	1285.89	1289	1289	1289	1289	1289	1289	1288.98	1288.11	1282.16	1271.74
1140	0.9	1.5	0.1	594.305	574.908	568.405	548.012	528.153	515.018	512.015	510.967	510.002	510.384	509.927	511.012	510.714	509.882	509.874	509.06	508.057	507.671	506.289	505.439	504.734	503.69	502.477	501.852	500.658	498.749	498.059	494.595	494.641	498.997	505.394	504.51	503.436	502.637	501.891	500.268	500.888	515.277	514.468	512.312	511.118	510.185	508.815	507.345	506.06	553.93
1296	0.6	9	0.4	449.418	471.347	479.149	482.031	484.286	486.888	481.734	473.922	466.204	459.803	452.828	445.41	437.197	430.14	426.959	422.424	417.514	440.89	457.874	453.789	449.465	444.838	468.826	480.401	480.553	479.699	478.987	477.757	493.631	505.791	502.719	495.805	488.256	482.035	475.966	493.191	498.962	491.371	469.014	448.756	473.404	504.937	503.415	499.957	495.544	489.839
1277	0.7	1.5	0.3	594.399	568.554	550.202	527.349	509.564	500.126	491.674	481.499	475.833	472.342	468.99	471.049	473.742	477.428	485.721	497.585	499.69	508.208	511.63	499.315	497.957	496.425	494.651	492.211	489.18	486.336	484.672	483.341	485.092	486.606	483.948	479.599	475.506	471.766	468.458	465.002	463.624	468.754	478.599	488.065	490.553	490.785	488.298	484.46	480.354	476.974
1280	0.7	0.1	0.2	1121.34	1026.87	925.626	843.957	820.38	798.387	752.591	703.365	811.038	1148.68	1145.07	1147.14	1164.15	1167.35	1175.57	1174.72	1132.06	1067.91	978.975	878.806	845.586	849.474	855.234	846.168	846.086	845.953	846.038	846.226	845.985	844.308	844.028	832.061	820.607	813.602	809.992	808.459	807.328	818.476	833.127	844.166	839.165	830.184	810.001	783.787	758.432	739.959
182	0.5	1	0.2	678.162	966.678	1101.11	1096.26	1065.48	977.371	861.632	739.649	570.793	443.464	419.192	404.721	388.761	410.109	441.915	452.096	433.065	409.641	361.913	328.721	311.404	296.595	328.705	550.046	926.762	1047.85	1102.31	1102.67	1102.03	1077.92	1021.79	932.255	849.307	765.138	629.847	825.726	1041.79	1102.01	1102.44	1102.42	1102.29	1085.47	1014.01	921.569	842.849	757.786
1152	0.5	0.3	0.3	0	0	0	0	0	0	0	0	0	0	0	0	0	0	0	0	0	0	0	0	0	0	0	0	0	0	0	0	0	0	0	0	0	0	0	0	0	0	0	0	0	0	0	0	0	0
1295	0.2	0.1	0.1	827.072	867.562	872	872	871.986	870.603	861.07	847.634	834.255	825.443	816.168	810.558	808.703	820.816	825.76	822.211	824.301	858.854	871.331	865.979	864.362	860.401	871.99	872	872	872	872	871.992	872	872	871.203	867.42	858.358	853.692	860.597	872	872	872	872	872	871.999	871.955	871.134	869.949	869.302	867.145
629	2	0.1	0.5	190.559	479.244	494.549	474.538	452.01	461.147	500.358	488.376	490.734	487.351	488.396	491.602	490.444	485.704	472.646	470.762	471.805	475.477	492.311	493.809	494.712	494.122	495.841	504.017	492.647	478.758	481.146	483.662	469.434	476.233	483.467	486.577	492.716	486.235	484.802	489.167	489.446	488.978	480.625	475.071	467.404	471.586	496.714	481.723	492.893	488.632
1266	0.2	0.1	0.1	676.403	686.062	688.1	688.1	688.1	688.08	687.23	685.556	683.219	681.703	679.779	677.947	674.291	670.894	667.061	662.15	658.882	657.115	654.539	650.432	649.761	648.981	648.647	647.519	646.448	645.915	645.528	646.105	649.482	651.636	651.155	648.366	644.397	641.182	639.671	655.373	669.683	685.947	688.1	688.1	688.1	688.1	687.951	687.741	687.27	686.793
1176	1	0.1	0.1	470.216	464.246	457.946	450.371	443.174	446.048	459.777	477.97	491.73	679.748	669.366	683.834	657.144	609.468	571.435	538.769	496.847	478.947	479.116	479.228	479.341	477.469	479.486	479.24	478.261	478.794	478.963	479.28	490.108	547.504	616.079	610.477	586.806	552.039	509.623	479.739	478.504	488.827	482.206	479.346	479.05	478.988	479.093	479.193	479.459	489.06
758	10	7	0.6	259.599	258.809	258.82	266.862	263.408	255.654	244.947	241.17	251.001	252.255	256.744	260.949	262.181	263.479	261.503	264.309	261.377	261.268	248.174	221.362	205.408	210.534	200.953	193.914	192.868	190.302	189.008	193.685	188.794	183.988	195.232	201.088	201.137	227.848	250.003	262.387	259.979	255.394	261.151	264.029	254.678	251.742	255.311	240.193	232.507	239.846
1242	0.9	0.1	0.1	626.569	590.067	547.832	507.742	462.067	428.29	387.283	339.961	346.048	640.1	640.025	639.789	639.898	636.808	627.933	611.676	585	532.394	459.622	429.786	440.129	447.502	447.304	447.342	447.292	447.395	446.583	441.453	430.509	399.204	343.988	291.185	256.292	241.877	234.194	230.266	317.449	453.373	488.115	468.021	445.887	422.245	370.121	309.655	272.488	257.274
1236	0.8	0.5	3	221.567	215.78	187.354	145.597	105.417	61.3001	52.4632	51.2441	49.5848	47.5948	45.3029	42.7002	43.523	45.6255	48.6722	52.5534	52.7469	52.7215	52.7554	52.9204	52.8176	48.2746	52.9602	52.7145	52.7809	52.7481	52.6963	52.7575	52.6884	52.0383	52.6873	52.7318	52.7765	52.8169	52.8397	52.7469	52.8007	52.6253	52.6991	52.6433	52.7452	52.768	52.8067	52.7099	52.7173	52.4688
1194	2	0.1	0.1	352.526	352.596	352.672	352.768	352.809	352.952	352.469	349.903	347.677	350.821	352.592	352.705	352.775	352.728	352.571	352.611	352.694	352.828	351.758	350.921	350.977	368.626	385.436	356.293	352.585	352.33	352.681	352.735	361.391	355.758	352.835	352.721	352.677	352.793	352.772	352.605	352.715	352.636	352.653	352.666	352.906	352.834	352.378	352.698	352.573	352.568
[truncated: 434 more columns]

## Sheet: Outflow(OBS inflow-No Demand)
grand_id	p1	p2	p3	1980-01	1980-02	1980-03	1980-04	1980-05	1980-06	1980-07	1980-08	1980-09	1980-10	1980-11	1980-12	1981-01	1981-02	1981-03	1981-04	1981-05	1981-06	1981-07	1981-08	1981-09	1981-10	1981-11	1981-12	1982-01	1982-02	1982-03	1982-04	1982-05	1982-06	1982-07	1982-08	1982-09	1982-10	1982-11	1982-12	1983-01	1983-02	1983-03	1983-04	1983-05	1983-06	1983-07	1983-08	1983-09	1983-10
753	0.6	0.5	0.1	1441.54	1268.84	1475.56	1334.96	1435.84	1702.84	1411.47	1510.17	1605.29	1612.74	1419.85	1556.62	1681.41	1353.22	1392.9	1124.68	1681.14	1752.57	1349.74	1489.73	1574.92	1662.99	1601.39	1484.09	1669.54	1625.12	1724.77	1552.22	1649.4	1902.05	1650.71	1507	1666.15	1856.15	1553.89	1807.57	1779.47	1759.73	1652.45	1513.63	1889.61	1959.43	1706.55	1511.61	1569.02	1867.07
870	0.6	0.5	0.1	1852.14	1735.41	1788.72	1569.3	1713.29	1812.03	1628.98	1654.79	1478.61	1783.41	1701.78	1649.98	1959.32	1647.75	1644.61	1577.94	1861.31	1891.6	1835.63	1641.69	1644.4	1635.35	1561.92	1473.19	1776.5	1740.22	1871.35	1637.28	2250.99	1591.44	1924.45	1854.39	1781.55	2045.28	2045.7	1757.67	1864.23	1986.7	2004.22	1760.06	1858.7	1912.67	1907.52	2070.37	1745.6	1661.43
597	0.6	0.3	0.5	671.457	759.433	763.269	1006.11	1466.51	1189.13	901.697	1138.29	1344.65	1161.35	1201.42	1168.66	587.789	520.737	550.791	579.89	615.054	605.097	497.443	523.976	606.271	580.823	496.614	529.813	562.011	578.274	547.77	618.149	675.431	1036.52	951.584	1187.25	1094.6	1179.28	968.517	764.228	635.703	663.703	1113.39	1110.91	1479.19	1443.94	3277.66	1494.92	1194.65	1352.7
307	0.5	0.3	0.3	330.778	314.198	373.966	329.921	374.647	690.84	462.208	532.825	536.535	428.223	383.366	351.424	372.879	415.618	470.651	322.681	758.011	576.965	471.288	541.98	565.085	610.802	596.743	558.241	631.062	628.291	595.521	527.439	689.267	676.763	517.98	546.754	587.54	622.416	571.178	628.93	606.226	581.611	587.936	564.776	687.812	557.761	633.987	531.668	536.862	622.524
1753	4	0.1	1	6833.51	4007.98	12857.7	5640.54	4815.18	3438.56	2315.93	2234.13	2256.5	2307.38	2593.93	1408.92	2219.64	3164.61	1902.25	2248.72	1197.03	3218	2386.49	2362.73	2417.65	1561.96	3160.75	2511.49	10121.5	8891.94	5959.46	2882.24	1991.1	2286.4	2528.81	3279.2	3265.76	2229.16	4087.58	10104.2	5485.42	6199.45	4189.54	7866.03	8523.16	3584.11	3676.37	3088.05	1313.33	2139.3
297	0.4	1	0.6	340.176	611.096	584.973	765.245	864.956	1017.56	942.832	1049.95	785.639	628.225	592.574	749.449	521.609	530.768	596.582	757.558	994.132	970.882	1267.18	1077.29	1085.15	1167.23	920.316	601.05	589.637	740.95	552.3	668.74	1034.83	1046.58	994.092	1126.79	1170.5	1120.14	683.206	670.673	631.834	571.787	609.323	796.931	913.343	923.599	1182.09	995.013	1021.84	873.861
1036	0.9	1.5	0.3	217.351	254.987	226.404	174.608	180.18	349.684	323.861	246.462	154.295	197.702	233.441	155.81	226.174	211.6	189.072	180.676	213.042	171.826	173.124	180.758	134.847	202.967	160.552	205.148	254.221	214.28	180.748	220.258	213.482	571.572	291.481	374.944	131.784	200.236	286.559	1519.7	566.712	785.129	540.907	943.179	957.336	438.523	447.865	357.12	182.333	203.718
989	2	1	0.1	128.689	205.045	698.554	1098.48	444.415	122.327	73.831	142.883	61.3322	119.18	79.321	145.881	97.6396	105.953	86.3858	139.582	220.409	1489.51	838.002	839.895	836.754	639.063	693.823	497.554	694.174	991.519	1050.84	431.791	1241.38	1188.96	805.043	1510.88	362.652	127.14	132.3	1427.92	478.811	593.8	765.228	1856.45	2209.27	1021.79	882.433	1030.89	105.577	310.358
1026	5	0.3	0.1	81.7601	187.481	158.622	111.62	139.739	163.222	107.183	156.115	83.4113	159.703	169.588	113.587	38.3383	54.3728	50.9831	75.2831	159.623	167.337	113.974	159.157	122.308	143.073	125.09	187.399	197.222	148.704	150.955	140.579	175.756	444.568	223.097	182.158	113.687	157.97	231.817	1059.56	110.229	397.445	388.567	814.11	504.62	265.015	257.414	151.186	122.73	199.77
1848	1.5	0.8	0.3	266.871	163.983	426.382	187.793	198.249	233.793	213.899	226.528	264.52	210.203	170.353	73.3608	93.2765	128.263	180.109	174.115	162.694	126.408	113.593	85.9752	84.1821	88.6463	69.8678	97.6876	203.115	171.194	226.145	289.786	172.682	198.162	79.0437	122.952	69.7016	216.635	173.51	411.421	158.569	275.361	270.735	638.543	620.608	294.479	239.792	255.009	319.246	224.965
1869	1.5	0.8	0.3	228.453	131.028	360.31	284.658	335.415	233.49	175.39	123.666	398.231	145.402	233.848	102.277	80.0315	84.4629	117.463	65.6599	99.7026	52.4214	67.2683	64.1477	60.4772	73.9705	51.6505	72.42	136.643	52.6456	56.6628	303.106	107.413	213.297	112.405	82.5507	94.8483	63.0621	159.851	355.045	250.971	445.212	342.729	592.63	509.622	276.844	344.882	166.611	183.984	238.469
7313	0.7	0.2	0.1	206.194	269.159	296.323	419.078	531.909	569.094	409.995	467.271	528.478	394.01	380.742	341.723	292.594	262.904	306.376	330.029	620.966	1018.08	384.717	440.012	337.971	355.937	361.52	308.241	241.151	325.099	358.139	431.306	550.584	987.493	730.537	426.767	530.976	471.724	451.297	425.241	461.674	356.581	381.836	412.255	496.285	498.858	489.996	465.632	483.721	511.298
1042	1.5	0.4	0.3	107.585	102.452	98.9077	84.1583	80.8882	90.9573	71.3714	84.8216	88.618	91.7351	84.3327	84.1643	88.4068	82.1255	80.9821	59.4611	92.4616	75.9212	68.6176	64.8422	47.126	77.0576	52.5961	61.0305	97.0684	81.389	71.581	81.5831	100.545	87.4869	75.1382	79.6219	71.4068	94.8005	125.787	169.849	124.847	112.028	103.314	370.206	336.237	107.096	88.9575	94.6254	90.6884	112.243
884	0.2	0.1	0.1	1861.92	1304.32	1641.03	1539	2140.58	2021.56	2386.64	2751.26	2131.88	1935.48	1913.71	1144.94	1402.52	1374.93	1778.82	2507.98	2237.04	1798.47	2176.17	2324.58	1787.18	1518.11	1101.19	1286.38	1487.31	1079.36	1417.81	1722.2	1708.53	1218.25	1953.6	2348.49	2245.76	1770.68	1918.76	2049.04	2245.21	1582.46	1370.62	760.022	946.211	1581.68	1420.04	2729.58	2047.82	2063.04
1144	7	1.5	0.1	1303.85	1581.67	1120.55	1060.54	1230.72	881.055	570.017	385.811	423.537	1369	898.594	1318.09	815.138	846.409	1020.68	766.913	940.549	1894.75	1003.37	759.156	582.284	2006.2	1549.49	1646.97	1091.12	2075.23	1598.12	1147.76	2180.97	2569.35	1868.71	1421.13	873.052	851.475	877.953	3673.22	1673.48	2055.23	1739.95	1708.03	1890.12	1173.27	1094.83	856.604	688.703	710.643
1006	1	0.1	0.1	19.2267	23.2846	91.2415	111.096	37.4186	26.4397	8.47335	19.5287	12.9134	21.898	10.8214	15.8901	14.233	18.5784	15.4205	15.2077	23.1371	123.087	93.3867	26.0625	9.71362	63.23	69.2229	40.094	109.144	125.426	86.3603	47.7953	98.5355	119.452	22.5356	77.0916	25.9773	12.7078	46.903	228.038	114.094	54.558	33.9204	265.479	127.389	120.007	151.09	37.2979	15.7812	134.621
1048	8	6	0.1	146.699	90.4895	430.043	1536.41	1054.64	1086.46	41.0564	130.074	50.8495	138.499	63.7724	118.185	109.612	63.5277	89.4293	76.5874	171.02	88.4977	329.915	281.943	91.7352	130.202	760.035	181.378	114.941	387.191	569.136	62.2454	2349.76	2116.05	883.543	244.763	74.1871	91.8417	102.056	104.546	122.606	364.37	484.282	1426.7	1296.29	1047.73	409.316	65.4017	117.655	941.443
1032	4	2	0.1	53.2847	56.6119	145.104	407.29	109.051	21.0743	21.3175	58.0326	24.7575	62.513	18.8162	46.216	35.6437	46.4743	31.2085	54.9612	38.8892	37.5889	22.0758	40.5855	35.6039	59.4573	41.2428	24.2248	54.3316	130.364	199.661	33.1786	487.605	790.565	262.593	35.4927	21.2179	41.5539	48.5209	158.457	125.341	314.139	332.176	982.007	579.437	256.541	57.9303	25.1029	43.0798	88.5169
355	1.5	0.3	1.5	136.22	160.584	197.722	175.655	258.72	411	257.197	178.773	241.838	217.11	184.886	175.002	172.151	139.837	168.5	118.628	337.479	581.031	150.783	107.214	110.846	171.935	184.739	188.49	153.175	182.736	221.285	164.302	181.208	467.711	418.56	202.332	265.81	373.356	265.046	263.879	274.769	268.659	243.455	178.669	336.29	611.144	526.567	279.813	239.452	301.967
1101	6	0.6	0.3	147.077	75.3246	216.186	471.578	119.396	106.22	147.55	92.4232	155.367	104.03	170.842	66.6384	98.984	106.905	70.9371	113.527	106.298	145.919	74.1549	89.8586	106.837	82.0481	32.1112	72.9639	75.834	92.9793	117.786	118.223	65.7627	129.931	94.6213	180.501	63.223	54.0321	45.9096	194.672	225.736	328.939	102.583	358.202	378.268	77.9039	112.842	103.371	110.869	122.345
1023	10	7	0.1	185.679	188.658	210.334	650.704	199.124	189.992	23.0811	56.4191	25.3286	37.6822	36.4688	39.6727	41.0587	32.862	38.1109	34.3234	63.9904	133.234	86.7698	241.481	30.5907	50.376	393.353	110.219	39.2748	425.992	31.7959	145.924	823.932	645.139	241.428	91.8518	31.8411	37.833	41.8058	43.6086	39.6936	190.693	384.584	742.972	412.338	657.772	64.8223	29.1707	37.2309	449.575
1864	1.5	0.9	0.4	84.6195	63.385	212.361	102.625	107.913	130.71	102.838	112.091	98.9969	47.4878	64.5476	40.86	50.7508	59.1432	60.5147	37.7137	64.1503	39.6342	49.868	52.2011	48.0221	60.339	38.2148	50.1817	72.0005	40.9199	39.1996	84.8297	39.2137	62.2131	49.06	77.3012	86.5174	114.573	111.283	187.994	90.0533	171.398	173.77	285.074	278.984	134.202	142.248	116.636	155.504	105.845
1021	4	0.1	0.1	13.0665	7.73341	10.7991	56.9446	45.8797	86.4644	4.41171	11.8222	5.86407	9.82489	3.61122	20.3787	10.287	6.49242	12.6072	7.38115	15.9706	6.04385	8.50174	8.93985	19.2928	101.58	40.9115	15.8743	9.18917	34.2996	44.0771	8.05717	184.809	167.258	137.533	5.17682	5.81056	12.486	11.8358	8.94509	9.39126	10.0425	38.0571	89.012	62.0027	124.926	20.3021	11.4527	12.1647	9.85099
1120	0.6	7	0.1	3.56963	2.68546	2.68315	1.6751	4.78389	1.22407	0.880103	2.21244	5.93454	1.40186	2.11203	2.02198	3.51148	3.62357	2.26818	3.06763	3.13083	2.67911	3.4843	1.9258	2.0517	6.96384	1.05538	1.41577	5.79172	1.62732	3.0826	1.99943	146.598	63.9506	23.5217	1.10273	2.89658	1.65785	5.0517	2.79361	2.66471	35.4213	1.9856	2.43891	21.4604	13.1226	0.858899	4.1251	1.54521	169.832
182	1.5	0.3	0.3	1018.26	854.978	673.775	585.105	453.362	249.513	177.559	134.277	162.507	126.638	158.499	156.018	157.494	135.477	290.658	223.56	152.032	114.166	135.885	117.431	115.428	113.673	219.767	559.086	720.439	953.697	820.92	1313.46	916.089	702.409	278.851	204.782	171.497	238.542	395.243	675.131	675.471	754.477	1305.29	857.82	969.95	902.554	697.324	315.518	182.5	154.372
7311	4	0.1	0.1	10.5191	10.2828	11.3899	24.7966	12.4472	3.58334	4.26709	11.6697	5.54134	11.1339	4.41513	9.14608	7.88211	12.0997	8.46585	7.46717	10.1757	5.4198	4.06637	9.0415	3.11561	15.4169	7.21147	4.35763	7.99751	9.21655	7.29288	3.58609	17.3871	173.4	7.41593	6.45858	3.80511	9.46887	5.67529	16.0636	5.31223	37.1431	85.8512	120.773	58.7848	6.11818	4.36376	4.44013	8.9266	15.3167
1755	1.5	1.5	0.4	75.0092	67.0588	184.787	107.715	64.2638	47.8486	52.4791	51.1411	48.011	48.3468	58.7793	59.5746	57.4341	71.5691	43.3576	81.7912	53.1824	245.057	50.9355	52.2324	49.8748	53.2646	77.7435	73.2254	219.697	197.575	167.903	147.358	71.6829	47.8944	52.8875	61.3504	67.153	49.1497	63.747	151.931	101.804	147.667	72.7276	229.593	298.054	139.831	169.327	104.947	40.3858	90.8569
1192	1.5	0.1	0.1	390.198	435.89	283.076	404.687	401.074	82.3906	43.9209	34.78	35.9127	72.9952	37.3946	66.9626	55.3926	110.853	68.6054	79.4351	270.49	492.139	117.227	57.2562	33.1752	113.75	99.8507	50.6038	95.8721	178.927	100.177	110.409	135.856	136.781	60.5199	46.6607	37.8539	74.3495	124.154	468.075	183.788	498.858	389.657	180.787	182.814	67.9729	139.195	57.1664	32.341	34.983
541	0.6	9	0.1	46.3601	12.751	73.136	101.118	344.736	468.64	168.809	52.7229	53.6994	48.8374	12.878	56.7015	13.1315	58.9006	13.9054	72.0562	15.798	125.321	79.0499	48.3031	12.6063	57.1833	13.3453	64.5645	13.9163	12.5002	60.8983	84.6796	252.022	302.58	162.507	139.449	91.848	81.7404	57.2506	12.4274	60.8137	12.5266	76.799	85.0775	245.982	399.721	262.963	147.542	45.4797	51.9939
1716	7	0.3	0.1	21.7036	20.7454	22.5055	36.9295	18.1378	17.0202	18.3483	17.7287	17.1761	18.1183	18.8105	23.6819	17.8555	23.1961	14.045	18.115	31.9084	12.1003	17.637	18.4543	17.5744	18.302	17.9483	29.2757	96.5604	88.1159	31.556	16.6123	19.143	18.5529	18.495	17.8696	18.3003	18.7521	19.4319	184.528	37.5545	91.6233	22.0952	187.689	31.5929	67.7154	16.702	18.4611	17.6061	28.0693
1883	1.5	0.2	0.1	66.1746	54.198	69.0996	73.4879	74.9587	39.2087	38.5223	31.7497	16.4132	22.0333	25.5828	37.9949	38.4187	42.8205	45.8187	39.2892	53.8063	82.2809	41.3212	51.0531	34.0346	45.6388	37.2835	46.8796	44.369	46.6274	40.827	49.7343	45.7635	26.9601	22.7588	19.1414	18.1527	19.3657	20.3717	61.986	33.6528	156.704	73.9266	49.1687	72.3327	52.5253	41.2135	38.215	46.0572	36.6833
895	1.5	0.3	0.1	1391.74	1024.23	1544.86	2181.57	2255.18	2204.34	2478.85	2761.63	2485.18	2633.74	2457.8	1303.3	1005.41	827.675	1701.83	2472.63	2471.41	2365.44	2425.21	2478.09	2379.29	2626.4	1372.35	1017.28	1087.77	914.367	1489.73	1927.62	2246.71	1987.74	2292.81	2398.18	2367.47	2545.32	2890.6	1945.8	1883.2	1459.59	1700.66	1103.61	1965.84	1424.52	2133.85	2665.39	2598.79	2651.88
1093	0.2	8	10	27.0413	45.6528	38.3019	73.4039	132.127	56.4396	14.3342	0.679914	4.53823	26.0817	11.0264	53.0639	6.96197	44.726	89.5491	38.168	143.215	241.761	96.3572	24.7057	7.0712	133.916	42.87	50.3948	160.622	160.798	138.442	37.2318	291.77	165.972	31.6005	20.7869	0.935355	5.01004	25.2207	276.032	44.4573	122.64	82.2609	137.828	359.394	52.2892	68.436	5.6808	1.20205	2.95974
1709	0.3	0.6	0.2	111.021	105.626	329.428	276.973	149.919	62.671	113.722	96.9366	67.1478	91.0332	112.309	67.0578	75.6779	143.439	220.473	299.722	329.551	346.014	81.188	103.463	74.6422	115.04	77.2553	212.599	257.402	348.35	482.076	158.628	97.0305	243.202	80.5719	79.016	72.2167	100.221	104.824	87.3187	77.1467	142.231	257.545	307.283	215.116	102.047	126.114	53.803	75.1144	234.639
1017	3	1.5	1	33.8746	52.658	66.6878	71.5883	39.6785	21.3181	11.9094	15.6918	17.4857	14.7028	18.1081	22.2953	16.6197	23.3304	22.2307	35.0222	102.688	68.3716	84.7789	24.1344	17.6598	18.4551	56.7134	33.553	62.8949	114.262	68.1905	96.346	64.7028	89.8472	31.0738	103.344	55.8344	61.5056	69.2036	195.026	112.084	131.281	92.1051	166.855	166.528	113.316	98.4891	80.5805	58.8062	23.396
[truncated: 434 more columns]

## Sheet: Storage(OBS inflow-No Demand)
grand_id	p1	p2	p3	1980-01	1980-02	1980-03	1980-04	1980-05	1980-06	1980-07	1980-08	1980-09	1980-10	1980-11	1980-12	1981-01	1981-02	1981-03	1981-04	1981-05	1981-06	1981-07	1981-08	1981-09	1981-10	1981-11	1981-12	1982-01	1982-02	1982-03	1982-04	1982-05	1982-06	1982-07	1982-08	1982-09	1982-10	1982-11	1982-12	1983-01	1983-02	1983-03	1983-04	1983-05	1983-06	1983-07	1983-08	1983-09	1983-10
753	0.6	0.5	0.1	21187.9	21007.3	21087.1	21123.8	21044.3	21330.6	21953.4	22027.9	21933.8	21992.2	22054.8	21672.9	21255.6	21111.1	21114.6	20922.4	20549.9	21878.5	23296.2	23383.9	22990	22613.6	22421.4	22275.2	21871.2	21578.1	21943.7	22999.4	23580.9	24712.5	27017.5	27960.5	27751.7	27601.2	27510.6	27136.7	26785.9	26587.3	26930.3	26852	26251.7	26261	27290.9	27607.8	27153.8	26577.5
870	0.6	0.5	0.1	20576.1	20585.3	21075.1	21357.2	20970.8	20550.5	20329.3	20344.4	20326.6	20397	20565.3	20753.1	20708	20929.5	21343.9	21238.6	20671	20417.2	20613.2	21042.4	20958.6	20671.9	20265.7	20221.7	20305.6	20771.6	21870.1	23418	24205.6	25562.9	25799	25657.5	25296.5	25008.2	25084.8	25449.1	25275	25113.1	25827.9	26383.5	26332.4	25819.3	25190.2	24657.6	24609	24306.5
597	0.6	0.3	0.5	17515.6	17515.6	17523.9	17528.7	18460.9	20742.7	21854.7	21201.4	20199.9	19410.3	18591.4	17904.7	17457.5	17265.5	17051.9	16744.6	16546.8	16782.7	16756.4	16396.7	16053.2	15984.2	15904.8	15714.2	15430.9	15209.4	15251.6	15326.2	16238	17824.9	18768.2	18547.7	18154.7	17825.6	17569.2	17519.7	17504.8	17517.5	17518.1	17528.6	18265.2	21776.9	25031.9	25052.3	24676.9	24086.3
307	0.5	0.3	0.3	16419.3	16369.9	16350	16418.2	16379.4	16794.2	17298.6	17075.9	16720.7	16469.9	16477	16434.4	16469	16472.4	16477.9	16458.5	16614.8	18251.2	19041.5	18774.5	18302.4	17908.3	17579	17291.2	16964.3	16803.3	17006.8	17215.8	17295.8	18396.6	19628.4	19638.7	19349.8	19111.8	18903.4	18704.2	18506	18329.6	18242.8	18055.1	17904.2	17954.6	18062.1	17985.1	17687.2	17395.2
1753	4	0.1	1	4629.42	4900.1	4685.97	4943.94	4818.88	4923.62	4860.21	4839.15	4869.05	4865.57	4864.14	4905.1	4840.44	4668.68	4944.05	4573.61	4970.14	4587.49	4864.36	4863.72	4767.25	4878.42	4783.05	4750.94	4763.35	4878.13	4897.85	4891.35	4920.62	4910.98	4809.78	4843.23	4790.45	4835.5	4701.24	4746.68	4937.77	4814.5	4898.62	4699.55	4795.4	4952.36	4859.7	4873.04	4931.51	4867.26
297	0.4	1	0.6	1754.13	1383.62	941.478	728.204	1831.89	3409.98	3821.38	3453.13	2938.56	2658.9	2383.33	2066.08	1758.36	1544.67	1218.01	958.714	1414.06	3424.35	4647.7	5023.28	4589.67	3849.69	3101.78	2649.39	2257.19	1800.49	1478.8	1228.05	1317.39	3081.68	4602.6	4575.33	4060.25	3439.15	2908.27	2579.61	2251.26	1957.83	1663.18	1425.75	1644.84	3225.33	3969.51	4066.96	3601.41	2993.07
1036	0.9	1.5	0.3	2197.87	2132.63	2208.03	2420.84	2545.86	2623.45	2650.35	2631.05	2615.17	2547.39	2396.23	2315.21	2202.14	2016.28	1945.71	1858.55	1765.26	1736.89	1689.83	1658.18	1621	1521.41	1445.32	1390.29	1418.85	2030.65	2448.9	2651.47	2637.37	2634.57	2652.43	2624.27	2566.84	2512.79	2464.01	2770.28	3023.95	2661.9	2649.82	2649.3	2745.75	2657.79	2640.17	2648.51	2638.29	2570.41
989	2	1	0.1	2164.72	2192.47	2474.27	2678.92	2607.86	2546.67	2509.57	2477.2	2461.08	2391.68	2329.77	2231.83	2164.96	2095.99	2028.96	1952.64	2054.49	2834.25	3934.01	3624.94	2883.37	2525.52	2546.87	2546.96	2541.07	2561.62	2615.39	2575.62	2536.96	3409.24	3632.76	3005.62	2580.6	2552.79	2546.49	2540.39	2591.99	2537.68	2540.98	3652.51	4647.21	4361.63	3846.63	3098.5	2548.52	2536.66
1026	5	0.3	0.1	1703.68	1723.11	1831.69	2048.03	2099.77	2122.46	2146.15	2094.5	2041.93	1946.26	1815.01	1733.83	1697.15	1678.46	1680.55	1695.85	1729.95	1860.41	2038.2	2159.42	2211.31	2185.69	2188.93	2147.49	2157.08	2585.22	2751.68	2887.18	2916.77	2922.25	2944.16	2923.87	2958.57	2902.56	2834.6	2718.05	2943.7	2875.4	2940.36	2910.36	2936.94	2943.79	2931.3	2947.61	2943.14	2889.24
1848	1.5	0.8	0.3	1484.81	1527.12	1684.77	2237.4	2364.94	2240.97	2077.11	1895.16	1697.42	1524	1472.77	1481.13	1469.03	1481.12	1482.37	1485.03	1479.3	1483.76	1471.7	1447.14	1421.09	1405.83	1388.9	1380.19	1450.64	1542.31	1542.6	1559.36	1594.97	1504.58	1470.07	1469.44	1475.91	1482.3	1477.54	1711.4	2304.13	2446.93	2565.81	2631.61	2700.9	2690.15	2473.93	2274.31	2080.42	1864.78
1869	1.5	0.8	0.3	1338.99	1411.37	1733.68	2447.56	2487.31	2298.82	2177.51	2048.04	1852.49	1620.93	1501.12	1370.7	1312.38	1321.38	1332.56	1334.17	1307.49	1291.35	1276.52	1238.54	1191.77	1151.25	1114.53	1074.91	1104.23	1232.16	1310.71	1475.4	1604.86	1481.57	1347.46	1324.8	1314.53	1317.91	1310.46	1704.79	2379.06	2508.34	2548.17	2540.57	2598.36	2589.18	2330.87	2203.07	2060.82	1904.52
7313	0.7	0.2	0.1	1763.07	1760.72	1761.81	1759.43	1900.86	2356.09	2495.93	2210.2	1876.71	1766.17	1761.92	1761.95	1762.22	1760.91	1762.24	1761.34	1879.46	2489.07	2481.47	2178.49	1828.88	1759.99	1761.85	1762.55	1761.07	1759.84	1761.95	1762.33	1903.1	2403.92	2527.05	2377.67	2106.74	2012.8	1992.64	1954.54	1855.75	1772.28	1761.75	1762.81	1800.58	2119.13	2468.41	2390.29	2183.95	2109
1042	1.5	0.4	0.3	1072.2	1067.29	1107.05	1226.68	1294.05	1322.7	1320.24	1275.04	1217.01	1166.42	1121.25	1080.05	1035.92	994.407	971.01	972.447	982.511	997.841	987.449	963.829	941.456	907.888	886.951	865.729	845.898	1001.72	1091.72	1122.62	1146.6	1208.23	1244.84	1226.28	1190.29	1140.8	1091.95	1553.19	1707.98	1701.74	1701.33	1703.38	1732.97	1703.37	1698.13	1653.98	1590.69	1536.89
884	0.2	0.1	0.1	2343.31	2343.36	2343.09	2343.45	2343.5	2343.6	2343.6	2343.6	2343.6	2343.46	2343.22	2343.45	2341.67	2342.96	2343.6	2343.6	2343.6	2343.58	2343.6	2343.6	2343.51	2343.04	2342.25	2343.55	2343.51	2343.03	2343.39	2343.43	2343.42	2342.91	2343.6	2343.6	2343.45	2343.6	2343.6	2343.6	2343.6	2343.6	2343.51	2336.6	2342.82	2343.6	2341.97	2343.6	2343.6	2343.6
1144	7	1.5	0.1	885.644	886.033	888.701	886.322	884.473	888.355	890.121	888.497	885.475	877.232	885.074	879.692	888.099	886.719	883.018	888.761	885.857	894.779	892.552	886.36	887.303	885.165	1285.59	1163.36	890.629	1041.37	1221.56	927.492	890.49	1425.2	1377.41	1022.97	888.188	886.526	884.599	1307.22	1418.33	1218.37	1385.36	1191.78	905.064	888.789	886.616	887.116	885.393	887.219
1006	1	0.1	0.1	1352.44	1370.85	1425.85	1445.22	1443.21	1439.41	1422.26	1398.6	1381.4	1368.27	1367.2	1361.89	1353.76	1344.61	1339.96	1336.05	1353.96	1424.35	1463.15	1438.23	1438.66	1435.95	1442.65	1442.26	1441.88	1445.25	1442.85	1443.03	1441.78	1443.39	1442.71	1432.26	1440.71	1441.61	1440.92	1484.28	1486.47	1443.3	1442.89	1460.24	1614.49	1601.21	1509.98	1440.08	1424.79	1435.41
1048	8	6	0.1	592.893	730.984	612.537	654.374	717.538	699.548	777.132	768.37	746.404	684.829	638.098	585.689	551.398	542.65	518.128	487.977	485.793	735.288	764.657	735.271	666.601	721.431	670.873	768.93	727.076	719.363	681.914	735.127	590.144	735.456	763.559	740.157	761.739	724.792	677.595	657.442	665.012	722.649	696.988	706.516	718.712	725.084	757.501	817.685	795.442	581.422
1032	4	2	0.1	483.551	489.632	590.292	759.162	758.62	742.218	715.639	667.676	628.873	590.661	553.603	510.961	479.588	436.047	400.949	375.679	379.831	431.171	515.751	512.359	514.471	509.202	593.599	639.316	649.727	739.157	755.929	762.313	716.134	788.706	787.189	751.804	751.661	726.992	700.565	715.744	738.394	739.321	752.102	796.088	921.117	776.698	757.7	729.816	683.172	683.009
355	1.5	0.3	1.5	1222.78	1219.38	1220.02	1222.31	1219.28	1218.56	1220.91	1221	1220.66	1221.95	1220.65	1220.47	1221.1	1220.36	1220.67	1225.04	1214.18	1232.62	1220.25	1192.22	1177.61	1212.79	1219.69	1221	1222.39	1220.43	1221.69	1222.22	1220.55	1219	1222.26	1223.07	1220.67	1220.33	1221.19	1222.17	1220.92	1221.03	1222.31	1221	1218.17	1223.82	1341.3	1241.26	1220.94	1221.74
1101	6	0.6	0.3	730.97	747.173	797.594	1162.31	1162.88	1141.52	1071.08	1003.39	908.148	819.783	752.621	748.668	707.851	678.695	682.07	712.976	693.632	720.035	767.713	744.638	682.819	658.342	627.049	600.389	600.775	712.062	790.475	834.211	886.031	831.913	778.804	722.899	691.483	674.98	667.019	797.83	1143.75	1133.4	1102.34	1133.4	1139.94	1175.84	1156.13	1093.76	1012.93	912.674
1023	10	7	0.1	598.004	579.997	571.407	583.962	621.548	577.154	528.231	523.764	530.461	518.168	503.12	494.049	486.565	478.158	475.942	475.158	495.415	592.206	623.453	550.123	488.357	524.471	514.623	624.33	584.703	522.53	506.021	613.5	565.375	590.857	627.768	611.46	614.309	611.096	603.361	601.421	611.836	590.648	587.869	583.875	589.854	593.791	580.585	641.287	645.988	497.893
1864	1.5	0.9	0.4	567.193	597.947	674.749	901.939	941.096	868.552	781.929	688.991	600.731	569.422	559.493	560.817	542.115	541.295	551.697	569.91	557.714	548.435	530.774	501.977	472.449	446.547	430.028	412.161	419.059	462.096	483.42	533.104	595.953	582.782	566.273	554.98	592.473	605.005	592.704	729.774	993.229	1037.26	1044.6	1055.79	1069.21	1056.36	960.689	877.035	787.059	732.825
1021	4	0.1	0.1	783.899	796.227	807.253	843.243	847.482	845.375	847.868	832.585	818.016	806.944	798.786	789.172	783.028	777.632	773.607	769.052	787.206	826.61	825.16	821.594	844.554	809.828	839.311	850.782	847.907	848.183	837.159	830.898	838.268	849.433	848.612	850.789	840.387	828.478	820.245	819.043	818.754	823.969	842.061	847.447	848.101	847.697	847.982	832.704	822.984	826.84
1120	0.6	7	0.1	408.567	408.587	408.369	408.235	408.857	417.752	413.062	407.241	401.15	400.182	398.763	398.843	397.072	393.725	394.559	395.344	398.724	420.818	420.101	418.867	421.564	430.043	440.311	439.836	437.247	439.514	444.162	447.976	452.13	458.414	458.443	460.063	457.19	454.967	452.187	451.545	453.774	449.688	435.207	438.772	448.636	456.237	448.45	440.969	435.654	440.261
182	1.5	0.3	0.3	841.662	881.164	910.298	765.739	757.651	760.042	756.543	755.65	735.066	726.611	689.923	693.027	702.707	728.783	751.534	757.594	744.444	677.766	467.354	347.25	300.213	268.826	321.706	683.489	940.017	898.366	1050.66	1100.99	1096.97	968.199	766.643	756.609	755.923	743.948	747.995	778.674	762.988	832.552	1074.53	1087.15	1082.88	1102.21	1004.2	768.232	757.749	754.482
7311	4	0.1	0.1	653.934	651.017	665.092	730.399	731.257	731.637	724.495	711.816	701.6	689.436	681.709	673.538	667.19	654.619	645.945	638.514	635.232	649.378	647.25	638.504	630.942	621.378	623.772	624.567	620.565	618.423	629.935	638.01	651.822	728.813	730.021	727.106	721.857	713.775	707.006	700.207	709.426	725.88	718.579	728.198	727.606	730.012	730.792	723.85	713.943	707.593
1755	1.5	1.5	0.4	206.457	271.319	381.108	404.717	396.891	389.411	370.782	342.046	308.376	272.195	233.687	190.67	166.026	274.711	360.499	382.671	391.084	402.212	395.295	373.407	345.745	313.279	276.832	293.435	410.294	478.665	471.746	399.772	397.44	391.755	374.421	348.168	392.171	381.401	347.81	359.866	398.66	397.088	398.444	395.892	538.545	660.198	532.35	402.462	345.319	284.779
1192	1.5	0.1	0.1	634.324	645.344	642.316	641.282	646.829	645.737	637.881	634.393	631.13	636.993	621.483	635.931	640.924	631.02	639.687	638.317	630.268	641.724	645.337	642.61	637.148	627.371	636.913	637.265	634.352	636.395	641.861	643.384	639.685	640.813	641.777	638.074	636.582	639.744	629.807	633.735	644.314	639.37	642.995	644.423	632.282	637.367	635.352	631.82	638.554	644.066
541	0.6	9	0.1	352.515	356.581	326.089	337.783	341.353	346.222	356.293	348.088	347.707	347.852	356.482	338.004	355.064	347.183	339.253	352.301	339.549	340.597	352.733	351.153	354.176	339.308	354.114	338.312	342.627	359.077	341.521	340.045	336.822	344.019	354.57	346.778	347.969	350.119	347.345	349.725	344.865	344.799	338.361	339.959	334.008	341.053	353.333	352.308	352.925	352.235
1716	7	0.3	0.1	426.178	439.137	479.646	510.855	502.653	493.682	480.697	463.355	446.96	433.551	423.689	415.491	408.724	423.679	435.326	430.54	444.977	498.054	495.243	484.977	473.657	461.149	452.452	444.297	468.694	480.046	510.142	520.089	517.333	515.476	505.963	489.151	477.462	467.075	456.124	442.611	514.419	461.859	475.431	489.728	499.328	490.442	485.41	470.496	456.854	470.408
1883	1.5	0.2	0.1	506.238	505.908	506.158	505.673	504.474	507.004	506.602	506.512	501.118	496.499	498.864	506.401	506.707	506.123	506.343	506.803	506.248	506.808	506.75	506.212	506.707	506.531	506.727	506.762	506.515	506.731	506.227	506.609	506.692	507.207	505.284	500.633	489.813	480.173	470.748	472.522	506.786	506.439	507.786	506.755	504.258	506.332	506.756	506.7	506.845	506.655
895	1.5	0.3	0.1	372.825	381.617	356.471	366.583	363.348	370.577	367.535	369.198	372.499	368.228	373.383	385.055	364.767	398.615	355.233	359.673	373.025	374.293	370.098	369.863	371.293	366.352	388.899	374.756	379.537	384.996	367.255	362.465	373.048	365.349	373.059	374.807	372.117	369.532	372.83	390.286	370.012	370.34	374.609	359.524	352.817	383.353	354.611	366.035	366.394	370.891
1093	0.2	8	10	0	0	0	0.0111635	13.9845	25.0993	9.54936	0	0	0	0.00189528	0	0	0	0.0836638	0	9.49609	33.537	6.63595	0	0	6.3926	30.3005	1.6213	0	36.2707	22.7788	5.51235	15.6651	29.0069	22.1384	2.07064	0.0544318	0	0	22.7237	39.4997	2.18655	10.6206	5.17848	23.1249	40.7642	1.75986	0.00340297	0.00133517	0
1709	0.3	0.6	0.2	412.986	465.967	509.9	509.9	509.656	505.22	495.294	490.741	470.853	412.527	365.504	387.386	384.057	416.801	509.9	509.9	509.9	509.9	504.345	499.144	504.647	479.002	491.077	506.914	509.892	509.9	509.9	509.9	502.006	509.552	507.477	488.095	449.379	395.4	376.773	467.557	504.037	508.941	509.9	509.9	509.9	509.011	498.695	490.282	435.374	329.469
1017	3	1.5	1	49.101	48.8128	49.3686	50.5317	49.7398	49.9684	49.7699	48.9239	48.5605	49.6041	49.5356	49.4723	49.5839	49.06	49.6986	49.0376	52.536	63.6857	51.1572	50.2784	49.6584	49.1382	48.8735	49.7174	48.9896	100.02	141.889	130.165	111.759	75.7014	51.1918	46.8263	69.1805	74.0164	52.102	212.742	310.402	238.636	172.749	127.543	294.798	275.643	192.14	123.714	62.3028	49.0695
[truncated: 434 more columns]
