# Supplementary material for: The value of observed reservoir storage anomalies for improving the simulation of reservoir dynamics in large-scale hydrological models
Source: Copernicus journal article supplement (doi:10.5194/hess-29-4073-2025), 2025-09-03
Supplement: Supplementary file 8 [file SA_results_calibrated_against_outflow.xlsx]

## Sheet: Readme
	Sheet name	Note	Inflow source	Total number of reservoirs	Number of reservoirs where downstream demand is taken into account
	Outflow(WG inflow-No Demand)	Simulated outflow (×106 m3/month) where downstream demand is not considered for irrigation and supply reservoirs.	WaterGAP	100	0
	Storage(WG inflow-No Demand)	Simulated storage (×106 m3) where downstream demand is not considered for irrigation and supply reservoirs.	WaterGAP	100	0
	Outflow(WG inflow-With Demand)	Simulated outflow (×106 m3/month) where downstream demand is considered for irrigation and supply reservoirs.	WaterGAP	21	21
	Storage(WG inflow-With Demand)	Simulated storage (×106 m3) where downstream demand is considered for irrigation and supply reservoirs.	WaterGAP	21	21
	Outflow(OBS inflow-No Demand)	Simulated outflow (×106 m3/month) where downstream demand is not considered for irrigation reservoirs.	Observed	35	0
	Storage(OBS inflow-No Demand)	Simulated storage (×106 m3) where downstream demand is not considered for irrigation reservoirs.	Observed	35	0

## Sheet: Outflow(WG inflow-No Demand)
grand_id	p1	p2	p3	1980-01	1980-02	1980-03	1980-04	1980-05	1980-06	1980-07	1980-08	1980-09	1980-10	1980-11	1980-12	1981-01	1981-02	1981-03	1981-04	1981-05	1981-06	1981-07	1981-08	1981-09	1981-10	1981-11	1981-12	1982-01	1982-02	1982-03	1982-04	1982-05	1982-06	1982-07	1982-08	1982-09	1982-10	1982-11	1982-12	1983-01	1983-02	1983-03	1983-04	1983-05	1983-06	1983-07	1983-08	1983-09	1983-10
610	0.4	0.5	0.1	2204.19	4583.12	3663.81	2124	3935.16	4905.99	2053.4	1500.43	1484.12	1556.25	1510.86	1555.91	1541.14	1378.83	1864.78	1614.93	1428.72	1316.6	1171.78	1128.47	1118.39	1153.72	1112.58	1147.02	1169.95	1177.76	1142.85	1028.76	1120.14	1107.92	1131.84	1135.56	1099.46	1134.44	1094.21	1252.68	1118.71	1081.69	1227.01	1628.41	1125.08	1094.29	1231.51	1202.18	1109.88	1405.43
753	0.6	0.5	0.4	1717.18	1470.84	1676.26	1749.03	1666.98	1650.39	1450.99	1564.21	1666.12	1709.47	1558.6	1689.76	1612.78	1429.36	1682.93	1593.33	1825.36	1573.15	1397.91	1499.68	1582.65	1692.22	1516.76	1578.55	1625.31	1371.51	1799.68	1977.96	1600.94	2679.03	2497.87	1793.72	1635.27	1793.34	1657.86	1719.14	2384.24	1863.32	2398.02	2358.68	2928.95	2710.96	2196.85	1574.43	1636.97	1752.96
870	8	0.5	0.5	2241.92	1960.64	2181.98	2137.1	2152.07	2097.72	2110.22	1867.75	1767.22	2005.1	1998.14	2082.37	2070.03	1877.15	2054.46	1909.84	1972.7	1799.15	1734.59	1757.21	1724.59	1775.14	1711.71	1765.4	1760.4	1586.25	1989.04	2275.74	2053.76	2067.98	2233.62	2279.79	2205.71	2344.64	2249.21	2305.03	2312.18	2088.43	2411.09	2321.48	2304.3	2222.75	2364.35	2342.34	2254.1	2334.72
597	0.3	0.9	0.1	1251.78	1252.76	2845.66	3332.31	3852.38	2964.25	2534.51	2228.23	1186.54	1187.88	1055.91	1054.97	1023.24	880.9	1035.33	1302.75	1116.44	844.33	706.06	755.474	1038.67	1395.56	1114.2	902.74	895.941	892.719	1218.43	921.939	1115.49	824.295	698.753	919.237	1096.79	1085.95	957.495	1000.12	940.291	970.806	1247.99	935.194	1549.84	3150	2568.32	1000.66	1088.45	1169.02
307	0.2	0.4	0.1	566.131	611.565	792.997	1099.48	765.051	1028.26	610.181	857.698	931.356	894.203	816.841	812.303	805.202	771.26	837.08	880.689	1322.95	535.904	617.426	757.152	863.487	859.945	801.369	782.166	778.416	805.485	990.285	989.415	757.789	1026.74	643.814	800.061	886.861	971.641	852.484	903.962	909.914	759.58	891.314	880.616	861.658	717.721	719.312	693.603	941.271	902.288
1753	0.6	10	0.3	8897.98	8890.86	19591.1	11167.7	5645.72	3490.84	2459.13	2046	1935.85	2067.76	1977.39	2108.48	2175.07	7196.12	5886.18	5344.03	2859.53	2680.46	1917.82	1903.22	1755.75	5217.26	1704.17	2125.9	11701.1	11082.5	9257.65	6838.05	4360.08	2714.56	2144.32	2097.45	1973.18	1572.3	1617.49	11726.1	8393.24	10183.1	7344.3	11490	11371.5	5366.01	4111.52	2087.41	1705.86	1609.39
297	9	0.8	0.7	521.901	660.092	1184.42	1749.54	1013.14	724.198	710.545	927.944	768.629	746.782	798.06	891.985	746.954	734.953	668.679	931.661	966.195	2524.82	1998.05	695.504	801.366	808.476	705.973	750.723	655.364	1066.93	965.692	1320.88	1364.4	1060.19	526.861	740.844	776.446	657.457	567.95	994.747	1036.98	957.134	3052.31	1306.17	1361.73	1517.88	1402.73	817.067	478.761	628.741
1036	7	0.9	0.4	418.743	344.936	356.17	315.779	346.626	289.047	347.773	346.684	331.249	338.994	339.443	332.301	2436.43	431.811	406.71	394.51	346.521	276.177	223.755	226.967	185.136	238.842	283.789	289.561	499.526	376.297	280.225	382.289	401.483	488.994	400.219	430.418	395.128	421.717	508.398	1285.19	684.736	372.429	644.94	1248.33	379.843	377.494	434.615	437.167	424.083	457.032
989	0.3	2	0.5	314.969	595.993	1254.68	1059.2	576.471	356.823	281.076	298.9	280.462	296.156	296.681	339.87	274.755	332.061	275.826	275.38	529.082	2144.66	1032.7	629.039	436.803	408.936	1055.39	747.774	1003.21	1424.91	841.854	578.202	913.22	1295.66	732.402	660.315	546.89	453.498	412.008	1419.53	665.39	831.286	744.054	3032.07	1644.87	691.478	617.11	367.723	373.047	755.554
1135	8	1.5	0.2	148.128	204.236	165.482	170.346	273.19	149.299	149.156	169.723	289.47	161.433	188.956	501.168	148.183	171.352	241.056	405.334	213.44	394.589	162.757	176.226	169.351	4455.8	1148.38	892.884	625.511	339.141	464.391	327.049	1699.36	1324.52	809.015	475.294	347.481	264.146	263.81	331.976	303.339	825.152	601.406	571.88	583.761	402.34	276.883	206.657	159.447	1480.75
1269	0.8	0.1	0.1	591.054	341.261	372.46	803.183	862.97	374.103	375.326	378.608	363.807	380.184	365.704	373.359	364.751	353.941	1449.65	2825.04	305.644	525.91	290.284	195.823	212.367	215.787	236.332	213.323	249.586	262.338	197.631	608.215	470.176	274.26	207.203	209.089	201.934	223.501	305.025	1766.64	820.929	1480.76	951.711	639.124	868.515	437.014	366.65	316.253	200.151	210.882
1077	5	0.3	0.1	184.62	342.681	247.328	260.666	851.228	368.623	179.694	124.305	126.321	110.957	99.9813	148.54	96.6306	100.028	213.704	127.349	157.415	200.797	106.223	109.5	97.7554	498.22	696.699	406.531	391.996	1209.65	465.781	303.247	1471.18	1205.19	494.81	341.893	249.936	214.39	195.904	427.372	331.491	952.81	619.256	704.824	859.465	532.944	315.068	209.752	158.623	1166.81
1026	0.4	0.2	0.1	62.3441	75.6304	69.4005	176.163	228.277	72.1876	55.2294	230.71	62.6768	67.5455	79.7703	1226.21	63.7825	64.5865	56.935	56.1291	82.7651	314.356	53.1137	274.923	52.4579	855.291	59.4274	71.4287	1873.82	1350.23	838.256	257.667	119.596	195.677	103.032	397.451	80.6815	118.557	232.47	1560.4	452.904	206.96	248.738	865.2	399.432	194.741	157.74	123.067	121.666	387.434
740	1.5	3	1	35.7504	26.0967	28.1103	25.7315	24.3694	22.9415	23.8119	25.2808	27.8037	27.7082	27.2401	27.6254	26.8105	23.9407	25.7971	24.6772	24.3296	25.7314	25.5949	24.1164	24.8358	28.5982	25.9194	27.1055	27.4511	24.2335	26.0042	24.5766	24.9142	23.9511	24.5865	23.9714	23.8999	29.5576	26.302	26.3643	25.826	22.9142	25.901	23.4392	22.5832	22.5964	23.2783	22.7257	25.5835	27.6845
1294	1.5	1.5	0.1	71.6859	93.0807	546.837	745.742	114.156	49.2502	67.6728	32.7753	176.118	73.7414	105.377	64.2467	77.1354	63.082	118.927	142.159	181.075	562.361	195.824	181.979	180.742	206.021	182.614	158.288	173.287	138.807	138.612	92.5737	114.058	65.056	75.4361	74.7328	72.1895	75.7127	74.6679	84.9468	84.071	145.4	224.122	100.67	106.529	88.969	91.8275	72.4467	70.3961	74.5223
1848	1.5	0.7	1.5	189.57	106.467	210.102	215.919	110.813	127.051	129.084	129.529	123.934	149.874	237.388	87.481	148.565	137.292	155.279	95.7728	125.117	152.909	106.752	112.965	660.565	698.983	288.32	533.566	449.52	197.468	178.755	317.51	131.395	134.741	33.5285	24.4094	20.7933	26.1721	203.724	390.797	155.946	257.181	209.121	439.053	309.085	149.896	233.611	224.057	222.202	138.253
1869	0.8	2	1.5	302.918	138.81	1237.55	735.78	153.842	168.826	169.91	166.212	161.125	186.727	186.069	189.934	523.511	906.928	210.308	152.14	162.606	161.034	157.515	147.255	155.577	159.332	153.412	30.8232	262.194	149.87	114.924	315.434	106.705	147.468	156.416	166.735	154.202	167.079	175.294	803.434	759.605	991.781	748.619	861.56	884.327	116.649	176.683	160.771	166.36	175.802
1863	0.6	0.5	0.1	186.872	84.284	387.028	112.953	137.753	109.659	111.562	114.992	124.142	138.084	115.677	105.36	109.877	166.324	92.4529	101.092	106.6	103.686	100.151	190.119	297.457	303.242	248.182	253.634	225.834	292.225	198.322	261.477	63.0561	89.1579	91.7335	90.0473	83.0304	103.881	172.907	125.589	71.0159	127.663	282.771	191.192	104.427	84.6869	91.3194	90.3397	91.029	89.0537
1770	8	1	0.6	811.277	176.759	442.328	149.016	92.7626	89.4295	100.15	98.2694	91.2334	47.5164	21.9126	27.2144	50.9354	185.185	58.5084	130.203	71.2331	144.258	71.519	92.0175	28.0915	27.8454	29.8687	158.887	147.067	275.867	289.224	107.013	95.0115	96.6196	98.4793	97.1291	94.8402	17.6298	57.2244	199.911	84.246	150.483	79.165	177.976	243.295	59.2178	94.7692	98.3854	92.0145	91.3715
965	0.7	4	1	116.553	65.1748	104.53	266.457	140.07	77.588	58.7995	82.0912	70.9689	83.0409	74.0822	83.3485	66.7837	76.3788	84.3127	63.5553	101.842	40.1613	76.0761	108.08	60.059	60.1348	228.159	387.502	362.786	1059.94	293.241	114.486	469.226	217.411	132.316	78.0787	68.8291	70.0725	68.302	76.01	100.163	94.1897	367.207	388.675	199.896	226.522	92.8671	56.2523	67.3034	79.5764
1247	2	2	0.5	86.8825	107.121	96.515	100.01	128.842	82.1013	87.8702	95.3414	173.507	92.2347	132.39	154.077	103.286	92.9241	176.32	105.21	100.172	106.076	110.021	105.284	101.592	846.836	174.585	162.939	146.429	175.225	166.9	118.884	480.495	349.824	194.022	131.595	106.417	105.274	102.563	110.655	110.855	109.472	140.77	124.223	105.486	107.886	98.8896	104.06	100.496	104.4
7313	0.3	0.1	0.1	312.918	301.444	360.894	396.599	647.081	732.277	504.108	399.792	492.429	331.989	315.5	324.996	306.313	352.348	340.665	352.936	823.933	639.646	506.766	426.994	356.679	491.168	477.04	492.127	395.107	562.795	482.472	592.577	1354.6	1109.29	568.101	553.654	413.525	388.569	326.304	369.845	369.417	429.736	815.89	669.386	714.091	669.317	597.321	398.157	349.318	401.498
1287	7	0.1	0.8	903.876	563.954	493.835	539.487	552.015	293.831	308.224	316.729	103.562	470.306	312.968	127.946	287.81	333.021	335.491	104.863	341.92	1698.75	582.272	308.154	323.501	1370.26	809.323	697.86	551.309	411.063	712.444	326.724	1387.02	830.719	507.942	526.874	320.377	325.434	332.517	1178.37	666.402	1054.22	1126.85	661.936	1025.78	472.166	310.186	316.029	310.893	335.54
1186	0.7	0.6	3	113.748	45.1324	163.7	65.9567	177.178	52.8097	56.6934	56.4226	55.8232	62.675	59.7033	60.9799	58.2563	53.893	62.6046	55.6073	78.6367	67.8991	49.5637	53.1971	52.4789	58.4744	60.4947	54.5702	59.4381	65.9558	47.0966	51.5559	55.145	49.7994	48.4934	49.1958	47.1792	114.037	124.987	201.353	71.3604	133.228	50.7149	38.276	56.8461	50.8956	50.1004	49.3518	48.6044	53.26
1042	0.6	0.2	0.1	94.1727	64.7827	64.5403	43.3294	48.0659	50.0389	51.0269	50.4452	48.137	49.2751	57.0772	47.3794	63.6323	61.1991	50.8385	56.0345	198.06	133.268	113.877	128.709	118.827	135.645	13.882	11.4532	188.087	81.8745	60.1805	49.9263	27.6508	40.7388	8.88967	11.6414	10.8685	11.5068	118.958	153.253	75.0262	103.736	137.717	149.712	75.2182	35.7315	19.3508	14.8295	11.127	91.2921
884	7	0.1	0.3	2410.78	2861.35	2290.16	2928.84	2992.93	2245.68	2965.84	2084.23	2229.89	2289.11	2267.47	1602.61	2258	2118.01	2297.02	2270.07	1602.54	2202.92	2274.9	2264.68	1497.4	2367.27	1473.46	2390.29	1505.11	1517.26	2252.2	1607.7	2234.41	1623.64	2205.57	2378.39	2241.25	2283.32	2240.44	2291	2291.3	2151.19	2300.16	2244.49	2288.53	1529.11	2276.85	3017.99	2218.32	2283.79
1273	1	8	0.1	17.5635	16.6967	16.0003	15.3402	26.8332	10.4974	8.75758	5.56187	97.5314	20.7006	25.3983	25.2382	15.4851	15.1786	23.2626	13.2218	15.695	22.7096	12.9368	14.9546	14.597	33.6879	12.6343	17.9851	19.8742	19.1737	19.5668	15.5636	27.3495	15.3533	17.9704	17.9605	17.6775	18.6285	18.2959	21.1759	22.9161	19.956	43.7917	37.628	35.1097	17.9422	17.8615	17.7295	17.8929	19.5812
961	0.1	1	0.4	0	0	0	0	0	0	0	0	0	0	0	0	0	0	0	0	0	0	0	0	0	0	0	0	0	0	0	0	0	0	0	0	0	0	0	0	12.698	11.597	15.4764	31.1397	91.2181	45.0185	24.0206	18.2206	15.2145	20.6803
1144	0.3	10	2	1256.11	1555.82	1187.66	1061.54	1200.11	900.992	548.29	415.123	451.626	1363.52	865.952	1385.61	780.857	860.852	1009.43	804.302	955.339	1900.57	996.983	801.695	618.552	2093.28	1810.31	1273.39	1239.24	2195.8	1507.52	984.115	2377.64	2990.45	1627.94	1059.47	916.886	859.586	841.105	4131.85	1655.64	2003.28	1848.85	1414.81	1772.37	1138.41	1150.82	807.796	732.236	663.751
616	10	0.3	0.1	1703.52	3277.93	3841.16	2355.98	3119.53	4717.97	2403.23	2137.26	1628.09	1701.99	1672.44	1701.72	1701.16	1569.11	1701.03	1582.78	1655.47	1582.76	1656.17	1542.91	1540.84	1614.91	1540.35	1612.48	1612.44	1437.7	1612.07	1493.32	1565.93	1448.77	1523.11	1322.83	1266.6	1301.55	1272.36	1345.34	1300.81	1169.46	1300.65	1271.75	1254.99	1182.2	1255.1	1254.66	1271.07	1301.09
911	8	0.9	2	335.086	421.746	623.521	651.841	396.24	399.045	254.531	241.087	239.797	237.077	228.383	241.099	223.412	237.499	205.069	221.815	203.772	407.627	725.223	607.972	127.137	131.21	141.036	155.129	120.687	707.268	1195.03	936.944	1280.5	759.81	694.113	463.609	434.357	443.475	617.636	1118.11	691.569	1408.82	1613.26	865.715	1373.9	998.527	1001.1	624.591	475.804	480.831
1006	0.9	1.5	0.3	216.455	213.286	170.671	92.6308	92.5978	19.7568	12.018	12.1346	11.6392	15.8526	12.7519	14.1726	15.9204	27.6883	25.6512	34.9192	69.9886	112.634	37.6698	32.1614	15.2664	132.692	29.1847	73.9526	131.758	55.8875	53.2186	30.1916	46.9561	64.3703	10.0681	127.084	5.03266	11.8569	23.0166	176.293	51.0604	40.7384	31.1837	170.281	87.4533	72.4121	27.5238	15.9892	11.8451	163.869
1048	9	0.8	0.3	357.946	888.335	1025.1	1371.73	1417.52	1157.97	724.756	455.603	282.165	473.385	289.528	477.24	294.762	287.412	297.81	288.905	289.948	288.926	100.866	114.176	286.255	114.007	615.5	264.994	310.886	809.397	538.963	444.656	1216.4	1229.91	699.226	453.402	454.196	285.092	469.213	352.99	308.784	353.07	907.918	1091.1	911.136	1011.67	606.89	459.718	463.993	791.429
1123	0.5	8	0.3	80.526	51.6315	50.5282	53.355	62.4232	44.0706	50.9362	50.5264	80.06	35.2088	41.7176	53.5172	59.1332	57.2763	48.9597	44.2197	69.9212	55.8711	43.3021	48.7965	47.1085	55.2906	231.567	164.507	400.007	68.7148	57.6097	33.9688	183.005	74.932	32.8063	28.4462	17.4953	18.1025	71.4057	204.63	38.6985	74.7622	79.9197	40.9447	175.067	42.4434	36.2574	17.5485	17.4264	18.1891
1032	9	0.8	0.2	150.634	131.298	224.619	311.44	206.885	129.392	116.682	118.774	113.532	116.621	110.487	115.005	110.439	107.743	119.84	100.182	132.92	106.993	91.5072	91.6856	50.2904	57.8681	149.119	98.2118	139.356	110.515	110.617	105.671	441.425	560.078	205.474	158.862	124.138	119.619	117.073	199.945	211.391	396.026	347.466	646.501	472.419	261.653	180.719	135.3	118.563	288.496
1774	0.7	1.5	0.3	669.937	210.526	858.243	489.054	322.127	216.418	235.951	229.903	217.693	219.903	208.953	209.033	407.142	529.871	339.192	359.929	323.27	343.733	822.983	200.189	139.176	88.672	75.2587	114.476	455.991	1098	794.29	323.355	250.679	219.703	201.063	211.867	211.724	135.886	245.714	435.945	475.068	733.936	496.12	659.976	533.753	272.997	206.597	211.483	197.738	143.01
1781	4	9	0.5	445.72	693.953	1806	944.55	452.073	226.033	183.696	175.448	169.699	173.752	177.221	185.486	191.703	377.019	639.896	633.221	227.81	280.612	166.185	171.63	166.224	165.318	156.412	1313.21	940.198	1044.61	1220.14	784.726	567.359	232.586	169.111	174.168	95.3646	77.5253	272.298	884.4	708.665	1108.15	1351.41	1375.2	788.761	610.996	238.979	148.538	89.0778	74.6658
355	10	0.1	0.2	154.181	134.613	191.076	389.144	291.42	203.283	164.735	244.492	124.988	43.4753	180.499	208.613	157.164	166.826	247.299	305.28	416.335	220.254	234.102	265.009	236.017	103.133	64.7015	155.562	139.956	151.351	222.075	287.718	298.079	223.85	138.33	225.89	69.4767	38.6858	214.773	242.108	242.684	267.114	248.658	403.672	583.934	599.013	422.569	381.533	465.439	312.753
1101	0.5	0.7	4	113.922	76.6875	338.493	231.093	95.461	87.8621	88.7187	87.8655	85.1289	100.034	181.653	78.8081	89.2422	101.995	101.057	78.0889	84.4096	98.6411	80.4289	79.4223	99.96	396.934	162.203	87.9467	131.893	127.991	116.833	209.371	76.2577	65.6909	59.2966	65.1908	58.9031	71.1366	98.9569	379.835	271.633	307.365	296.102	344.189	397.123	105.922	58.9135	58.4608	60.1155	66.701
1023	1	10	0.1	261.703	566.53	948.653	816.66	980.366	843.122	314.919	205.247	292.597	205.947	121.873	210.02	210.916	121.569	213.412	123.86	221.233	122.397	122.042	124.662	29.2974	33.7301	379.038	33.3822	37.3795	46.2217	106.095	124.972	142.782	162.944	101.553	118.655	33.2628	108.618	33.0746	37.4231	45.1237	47.3841	255.757	882.17	380.643	371.586	294.325	202.239	202.826	209.966
1060	0.5	4	0.3	14.4432	55.2427	106.405	33.2447	30.7717	20.0906	16.3267	12.8897	12.8492	13.6603	16.9053	104.599	13.3799	21.2442	64.5888	32.9685	81.7919	66.7889	33.2712	38.5755	18.9924	63.6394	91.8808	70.777	141.047	92.2388	82.9907	28.448	22.0999	71.0971	21.7	17.1199	16.3141	13.2023	104.746	181.065	166.815	105.424	80.4489	112.129	118.877	48.41	23.424	17.4323	16.5715	19.7048
1864	1	1.5	1	150.981	80.1767	491.827	281.936	109.703	98.5669	99.0348	96.26	98.4454	127.4	158.407	129.991	112.188	130.346	115.725	102.37	100.533	100.572	94.2186	89.3281	270.791	226.983	29.7279	43.8805	193.292	147.313	115.912	330.961	103.247	54.2374	33.218	66.0804	65.2053	93.5956	192.099	443.87	77.9395	98.7387	97.2847	449.519	459.677	100.485	101.97	98.3472	99.5383	105.011
1797	5	0.2	0.1	3600.76	2860.1	5454.71	2823.74	1797.57	1256.82	1121.97	999.462	910.096	895.517	886.448	994.187	1103.87	2940.36	2078.72	2343.16	1055.36	1202.76	655.775	655.067	603.099	1343.82	380.289	782.82	2981.48	4345.24	3239.54	1375.64	1502.16	1205.17	1115.28	1076.18	1001.07	966.02	1301.17	3360.3	2428.32	3503.33	3240.17	3254.19	2152.83	1485.67	1335.09	935.899	813.38	781.687
305	5	0.4	0.8	1773.44	1372.75	1518	2151.48	3785.65	3480.52	1971.51	1014.64	1559.8	1419.33	1733.48	2426.33	1739.98	2071.18	1756.56	2128.56	2936.24	3188.77	1583.37	763.492	1128.81	1545.54	1511.88	2121.96	1622.02	2821.06	3148.96	2744.58	3132.92	2477.65	2100.15	966.263	1190.89	1922.59	1733.1	2059.02	2413.6	1719.97	2310.15	1636.03	2039.99	1692.02	2081.03	1261.89	1434.89	1407.74
968	10	8	0.1	44.7979	47.6763	159.587	496.315	224.523	109.517	58.4053	57.9377	58.1622	65.4688	60.7627	63.9813	60.8779	54.1344	60.3705	56.0452	143.924	57.4198	48.0405	55.728	52.1221	57.1091	57.5136	57.8966	57.2354	59.5693	81.4946	62.8316	126.927	103.449	66.346	45.0768	39.027	38.6422	34.8918	34.6093	35.5365	41.5874	107.765	141.384	86.7011	159.434	67.3752	52.7262	57.3469	67.8294
1019	1	6	1.5	61.7579	53.9242	40.6673	24.5847	31.3961	32.7802	33.4768	33.6767	32.9134	34.4542	33.6693	35.276	34.1602	58.9324	77.4664	109.472	191.116	71.7853	77.3536	35.0655	7.83268	8.75158	8.68796	9.14626	59.3532	82.2135	44.9595	45.3287	12.3839	8.29854	8.50617	8.88297	9.24302	9.52764	11.112	165.814	65.0212	65.6733	43.1498	119.468	51.8648	36.5372	8.12105	8.49129	8.56596	9.64104
1302	4	3	0.3	22.72	14.189	16.2533	12.9727	19.9261	6.02418	14.4762	42.1685	23.654	16.4053	21.6542	22.1372	57.1694	13.4801	74.4736	45.0873	31.4805	256.638	30.3186	26.6259	21.2987	24.2549	21.6025	25.8879	16.2883	16.098	14.2424	13.972	21.0514	8.12884	22.9631	16.7732	16.2102	16.3619	16.8357	18.3632	18.7921	19.881	46.5701	15.0471	16.8436	14.6752	16.6046	16.1851	15.964	16.544
1824	6	0.8	0.1	8278.57	6980.24	17684.7	7959.06	4834.11	2805.64	2175.63	1813.27	1650.03	1784.9	1780.98	1856.55	2167.83	6786.52	4633.94	4733.69	2258.18	2106.5	1538.84	2151.3	823.067	740.076	701.128	1909.14	11226.8	10140.1	7089.33	4980.27	2581.13	2401.16	1928.59	1831.31	1557.38	1438.15	1546.38	10986.7	6353.76	8205.96	6712.58	10101	8008.95	3491.12	2383.08	1910.09	1469.32	1355.62
1316	1.5	0.1	0.2	0	0	0	0	0	0	0	0	0	0	0	0	0.660752	0.325365	0.889441	0.898764	1.36243	10.9493	2.54128	4.65982	4.9713	8.67884	4.12715	4.94942	4.45628	4.91469	4.94255	1.2775	11.3037	9.22348	5.40253	3.69844	2.3739	7.00199	2.41999	3.3414	0.90276	0.88097	0.342274	0.856064	0.502277	0.478918	0.250082	0.0488751	2.11914	0.334232
1835	1.5	0.1	0.2	7223.79	6067.04	14733.2	6427.39	4028.22	2393.34	1911.85	1612.91	1456.54	1529.21	1446.48	1502.8	1807.62	5944.34	3981.56	4164.92	1904.17	1896.59	1285.15	1928.88	788.591	629.327	669.961	1770.86	9214.62	8668.05	6583.43	3499.96	2516.97	1933.66	1731.08	1618.24	1445.79	1358.08	1472.64	8470.2	5010.85	7171.15	5427.66	7711.07	5926.25	2948.27	1961.51	1607.59	1320.84	1149.84
1847	2	0.1	0.2	5992.68	5016.29	11593.6	5294.08	3059.36	1985.65	1595.41	1364.69	1224.42	1177.66	1173.62	1335.13	1478.36	4957.97	3340.7	3607.68	1639.23	1724.88	1059.47	1025.83	1394.95	587.97	494.331	1381.28	6540.23	7817.46	5545.64	2531.02	1992.86	1713.24	1447.13	1461.38	1298.71	1211.04	1374.14	6510.12	3822.27	6046.3	4330.85	5809.31	4250.13	2517.91	1406.32	1463.73	1291.23	1075.57
1231	5	3	0.3	42.6521	18.2511	21.7452	62.1817	57.5495	21.6079	22.1673	22.4482	22.1337	24.288	23.6219	24.3593	23.7582	21.6082	24.6723	23.3483	34.454	549.691	74.0623	85.2241	87.2186	114.942	110.043	76.8546	85.9155	87.9801	76.4692	74.2526	68.578	41.3697	29.9822	21.1861	15.0993	16.9788	26.6617	125.608	72.5163	120.119	68.557	80.4672	89.9211	81.5638	79.1277	76.8152	71.9568	24.94
1140	0.9	5	0.8	5.50453	3.53653	1.39883	8.20855	5.74342	2.94187	3.35684	2.71372	4.05781	1.82751	7.4453	3.6211	3.61242	2.20616	4.67387	2.64894	4.97123	3.90703	3.24314	2.55338	1.45081	7.48912	1.26803	2.98353	7.55941	4.08	1.24707	45.4055	33.4735	13.1692	5.08003	9.21507	4.80598	4.13053	20.5422	27.3856	28.0999	9.96623	7.6288	5.5409	10.7609	12.0522	11.2352	8.97537	4.13775	35.5567
1296	10	0.5	2	38.1831	13.9234	19.1571	18.2813	23.3877	15.8895	18.1863	19.1235	18.3034	18.6296	18.0849	19.8395	21.0154	21.6884	18.1101	16.9475	18.1049	31.591	13.7699	17.1456	16.9819	28.7532	16.0651	14.515	18.593	17.0478	18.3081	31.5385	32.5377	22.3101	26.9009	27.839	27.4315	27.8733	32.2813	38.2768	34.7857	31.9905	31.5591	18.7574	39.5823	18.0164	26.7402	27.1964	26.3615	27.5637
1659	0.5	1.5	0.7	26.6015	29.3021	24.3113	26.637	30.9689	23.347	18.3366	19.0276	17.2745	18.1708	19.9533	19.2922	26.7907	24.3801	13.0301	28.3392	28.2096	24.7196	20.4634	35.3701	30.5888	32.715	18.8423	22.3553	38.1373	36.7891	37.4416	31.853	36.4431	36.7794	36.8678	36.4721	34.7413	36.413	57.6749	47.828	31.2025	31.8501	54.0406	32.619	39.7775	37.2122	35.2921	36.6295	34.9005	51.9266
1277	0.9	7	3	1.37377	1.6467	1.49048	1.45967	30.8719	0.956466	1.41838	1.42153	1.80286	1.1839	2.44268	1.77804	1.63506	1.48124	14.205	6.81383	6.30937	44.965	4.3074	1.4568	4.16582	2.95665	1.45458	1.41511	7.25967	1.8304	1.4954	10.1043	2.01415	2.43558	1.41517	1.44465	1.40091	1.44292	1.52916	2.36141	15.8445	1.58118	18.3246	5.08028	7.11758	2.77268	1.44173	1.45197	1.39627	1.45664
1021	1	0.7	4	87.9322	192.195	249.847	141.938	96.2824	71.9786	21.6406	47.0897	20.7068	21.6627	21.0846	22.2844	21.7999	19.5751	22.0143	20.005	28.3393	20.9188	19.7315	17.9113	17.8001	40.3084	39.5684	19.7674	25.9797	188.48	20.8124	40.4205	220.064	122.713	67.8864	43.7722	45.0124	21.9658	21.4291	22.3016	22.6173	36.2843	391.984	267.732	131.17	113.908	43.5849	21.8061	45.8295	23.8097
1280	0.7	0.1	0.4	11.6117	15.0043	15.9513	14.6386	20.015	12.0636	13.5707	15.4599	218.388	224.729	78.635	148.843	124.271	82.2071	150.791	74.7458	49.5991	30.8312	15.4114	16.1608	15.6386	98.2424	36.7209	30.7133	29.2417	32.9518	23.7528	16.6777	26.7273	19.5716	18.1612	15.7205	15.6683	16.1265	15.5863	16.0792	16.9284	15.7556	16.563	14.4944	15.5601	15.6192	15.2146	14.8057	15.0358	16.0159
1120	1.5	0.8	4	2.76422	2.04542	2.27683	4.19945	6.47079	2.12216	2.08279	2.05868	1.99475	2.12626	2.08104	2.17476	2.12503	1.91645	2.15036	2.04947	2.13233	2.09354	2.07574	2.1373	2.0599	2.26306	2.20476	2.29761	2.25837	2.2138	2.46774	2.26486	16.0347	31.9207	17.8478	13.3713	11.5643	7.8951	10.1803	8.14169	6.13939	8.4909	9.3341	8.26169	8.79	6.12566	2.07982	2.06532	1.99873	53.5016
182	0.2	0.5	0.1	297.271	588.364	227.177	186.979	155.383	140.669	60.0309	40.4681	39.0596	40.908	39.3171	42.2842	49.9643	64.7131	113.413	122.279	52.1759	37.4739	39.2422	37.8173	36.6816	39.7834	84.5593	191.081	297.845	472.668	408.012	488.086	178.377	162.94	134.783	144.783	42.3156	44.4225	221.269	309.1	393.195	510.29	695.356	290.288	168.446	162.842	142.284	137.886	41.8157	43.0589
7311	0.4	9	6	8.4454	37.1593	63.4138	26.1958	16.0136	11.7505	6.91003	6.25996	5.90427	6.15465	5.96295	6.26339	6.14951	5.64517	6.50718	6.13708	6.89791	8.62615	5.99912	6.10467	5.86733	6.16958	23.313	15.0316	25.8293	34.5302	25.843	14.7654	77.6163	63.837	21.4547	16.7069	12.8355	12.716	10.8813	12.0763	17.1628	58.8642	43.0192	93.5713	36.0615	23.5039	12.4268	11.1604	10.982	10.5713
1755	1.5	1	0.8	92.8089	91.489	182.118	70.0225	43.3012	26.7085	23.6388	13.9548	13.4589	13.9366	18.047	18.8146	18.4891	157.557	71.6548	60.2883	44.0867	170.012	31.8282	17.9528	18.6912	15.0678	55.3285	85.4312	191.104	136.07	105.362	100.609	51.4959	26.769	22.6337	45.2877	103.038	12.2649	17.8801	125.27	87.6721	100.665	49.2358	158.918	222.913	88.2002	143.08	30.1274	17.556	32.3151
1152	0.1	4	0.7	0	0	0	0	0	0	0	0	0	0	0	0	0	0	0	0	0	0	0	0	0	0	0	0	0	0	0	0	0	0	0	0	0	0	0	0	0	0	0	0	0	0	0	0	0	0
1192	0.5	10	3	267.864	334.888	251.891	219.481	268.026	194.792	152.216	109.835	110.805	114.707	113.749	114.952	114.801	110.251	115.166	111.461	112.054	248.102	144.505	106.702	59.8441	115.891	114.808	114.114	124.594	178.759	153.476	106.763	110.053	106.508	60.6029	62.201	60.6768	63.8711	64.9408	617.711	44.428	392.004	191.734	197.441	161.532	105.413	108.808	109.988	59.9459	63.7871
541	10	0.1	2	105.789	87.4401	89.7453	108.085	501.841	440.547	181.244	203.161	125.099	121.645	111.134	106.747	98.9614	86.1239	88.8464	223.369	103.912	70.5317	101.658	95.277	90.6159	98.8566	63.9095	20.5648	19.1893	12.2753	15.8274	95.1158	250.383	191.97	178.493	200.709	122.3	118.933	109.357	104.751	97.9045	83.7901	89.5095	53.372	275.823	184.945	179.409	205.318	121.626	123
1822	6	0.5	0.1	5027.52	4058.6	8851.12	4293.59	2512.52	1689.59	1401.88	1216.21	1079.38	1041.95	1022.49	1223.64	1329.17	4264.67	2761.03	3095.76	1407.06	1534.77	893.371	855.179	1119.55	505.307	454.956	1147.39	5225.96	6362.16	4883.52	2040.95	1736.17	1391.58	1355.33	1252.24	1130.56	1088.27	1461.31	5406.02	3278.19	4898.07	3824	4956.01	3201.12	2022.33	1454.59	1173.76	993.033	947.621
972	1.5	6	0.1	84.9344	190.283	597.89	413.406	147.121	101.426	73.7594	51.7419	30.1133	21.3721	20.2542	21.1866	20.9955	18.965	21.8001	20.6483	40.2077	17.7512	23.2027	21.2892	18.6332	19.2195	21.5718	23.2714	23.1674	28.6994	24.657	18.9782	22.0988	38.6641	34.8075	22.3496	18.9723	20.2349	19.642	20.9072	22.6026	30.8281	30.6144	270.116	75.5623	55.9849	42.7727	26.9057	18.2324	19.6497
613	0.5	6	2	117.897	175.151	163.118	418.973	1477.34	814.574	237.737	180.424	137.713	117.643	134.878	130.665	109.149	91.942	167.654	175.685	257.016	123.768	127.18	88.4574	72.2471	72.4908	66.7955	50.937	40.3888	67.4208	112.067	136.103	332.934	267.698	165.705	135.616	81.0595	77.5796	101.472	75.8453	74.1598	81.6917	153.729	265.965	472.52	523.849	244.412	145.726	116.047	89.7952
1086	0.5	0.2	1.5	0.753372	0.672051	0.579498	0.655429	0.2213	0.31513	0.298215	0.696791	1.9865	3.48855	0.904612	0.626629	0.609346	8.06609	19.2182	17.2559	4.81118	7.86695	47.5856	58.2121	6.93749	58.055	1.48432	1.48428	1.49646	1.57556	1.30637	1.35559	0.152152	0.579953	0.768288	4.69587	5.63796	10.3001	1.88733	1.76531	2.2791	2.42064	1.47918	0.857388	0.123556	0.4583	0.44032	0.461122	0.435813	7.52564
1295	7	0.2	0.1	198.463	82.1729	98.3747	41.5062	40.6544	14.959	12.7126	7.59856	13.6366	9.18998	34.8713	9.70601	13.1382	28.5653	14.2143	16.9374	37.2905	71.7894	32.3119	19.6126	19.6972	39.802	80.8176	27.4599	49.8285	26.5274	30.3823	79.9437	79.2689	41.377	22.5775	15.4853	12.9489	22.2931	123.374	86.1288	72.8834	116.978	104.01	54.7376	146.457	52.3188	37.5341	25.0711	22.2166	16.0557
1139	5	10	0.6	2.68704	7.29983	2.30241	2.26606	2.86743	2.04866	2.23182	2.27964	16.3835	9.00267	23.8144	32.3303	6.15436	25.4295	29.7835	9.97813	9.50447	9.35285	2.38329	2.46838	2.39619	109.732	13.9484	9.45727	14.1292	15.9403	15.1713	7.74895	89.0576	66.8379	14.6939	9.80585	8.2329	7.44998	7.06541	16.5211	21.1688	19.3726	15.4409	12.1532	7.56807	4.86934	2.40721	2.44828	2.35832	3.7923
1862	4	2	0.2	678.448	493.703	1849.47	428.079	300.737	140.803	115.842	117.037	112.982	136.966	119.734	106.138	118.846	685.87	241.855	258.503	120.919	137.073	111.222	112.605	103.589	194.611	485.938	83.0641	944.984	1291.82	309.967	455.474	151.74	169.556	103.486	88.1451	56.8628	79.7954	201.401	963.937	386.953	771.719	672.094	618.533	277.669	185.078	149.883	83.426	75.2952	62.6417
629	3	0.3	0.1	2164.85	4044.85	3938.34	1885.51	3441.84	4821.49	2190.48	1519.07	1541.79	2052.53	1510.72	2058.8	1544.64	1450.26	2077.74	1510.65	1540.06	1516.14	2062.63	1510.94	1520.47	1562.86	1511.69	1544.75	1565.1	1453.76	2052.1	1506.96	1548.91	1007.48	1552.79	1518.03	1484.48	1069.55	1498.01	1584.34	1515.98	959.535	1573.95	1504.11	1046.67	1069.9	1536.28	1611.33	1463.05	1598.79
1000	2	1.5	0.2	25.5386	39.7035	26.1414	21.6613	23.2534	24.3853	24.6334	24.3291	23.0093	35.6581	28.9792	23.5998	26.4047	33.8543	18.1026	22.3734	43.9716	27.8108	20.5074	26.6168	25.6938	35.0467	33.9282	29.5509	36.6099	44.3834	40.2774	26.9813	35.3854	32.9307	26.4877	36.4063	23.8824	27.3334	43.5093	94.031	39.8995	24.5581	30.8741	151.119	48.0015	26.8368	28.8691	28.6047	27.1655	50.0134
7306	0.1	0.1	0.1	7242.89	6215.63	14974.3	7188.57	4512	2585.4	1959.29	1721.02	1427.02	1743.21	1470.95	1497.83	1857.35	6301.51	3922.39	4408.5	1975.96	2040.13	1031.81	1006.6	856.76	743.14	612.848	1680.7	9067.59	9063.67	7472.14	3629.36	2733.13	2007.55	1714.3	1476.12	1732.06	1152.73	1511.11	8551.24	5663.74	7065.73	5943.87	7818.84	6883.14	2944.3	2167.9	1709.51	1138.37	1483.24
991	8	0.4	2	66.9374	55.0134	133.464	126.279	70.2957	47.3318	46.2886	46.6899	43.8167	45.6011	42.394	52.2753	39.1222	43.6916	529.415	43.6046	58.2765	54.1463	50.602	56.0063	37.3024	40.4452	92.4235	144.913	76.104	136.138	87.8486	64.6539	147.114	131.805	70.3564	72.3939	53.7878	54.4726	41.5084	20.0668	16.4185	51.572	77.2539	295.013	132.039	92.3518	67.8205	55.1128	53.6328	58.832
7317	3	3	0.3	74.3039	44.53	393.048	66.5934	66.6417	41.4753	47.9046	46.3751	44.2018	44.9744	43.0532	45.7383	51.1609	58.4639	40.1729	43.1695	42.5797	42.3386	41.878	41.2573	132.724	129.306	22.7526	37.9054	255.085	145.351	150.879	114.154	38.7238	25.8841	22.0057	28.1649	22.1635	21.9413	84.9934	176.065	126.801	161.951	63.056	232.314	209.998	89.6201	35.297	26.6868	21.4128	22.1971
998	1	1	0.7	255.001	74.3421	138.616	544.647	736.92	303.553	18.3402	81.9897	146.196	144.258	141.401	142.276	142.523	79.7271	156.454	73.495	79.3116	19.0025	24.7405	215.607	0.982715	40.6143	23.8917	25.0449	26.6403	27.0716	49.5144	27.6743	19.4862	49.7763	78.4314	84.7936	93.4242	101.856	99.2555	99.6281	80.4073	66.2537	151.95	304.786	171.884	124.708	109.494	112.554	107.193	136.292
1716	7	1.5	0.3	110.425	40.365	212.171	65.6058	41.4416	26.787	21.8941	12.8123	12.6295	22.4241	14.2397	58.5431	13.4047	114.35	38.6334	34.3152	219.594	69.7373	30.3246	28.9733	20.6446	22.0765	22.2443	112.048	208.58	227.206	190.14	69.3842	53.5169	35.2674	21.2855	20.3335	21.879	13.6229	22.7637	479.372	220.699	81.8308	116.336	254.128	269.366	194.819	29.7624	29.8041	21.0669	191.742
1896	4	0.3	1	641.486	461.34	1123.56	561.489	438.642	284.796	186.354	197.917	197.687	263.454	195.696	194.691	192.319	1052.84	396.011	277.598	218.457	201.21	180.745	166.89	142.832	147.155	115.326	183.793	511.298	596.491	458.687	581.998	290.071	240.699	240.742	207.432	168.296	201.967	169.036	556.461	430.245	514.873	591.73	441.345	351.645	260.074	201.089	205.405	242.358	177.427
1883	0.4	1	8	252.124	206.488	534.819	77.7064	111.987	25.0319	27.4354	27.8115	27.5946	28.1101	33.6094	31.6799	27.8816	345.312	20.0267	26.0941	27.6439	26.7746	27.5388	27.5612	25.462	27.6432	23.4803	54.2157	225.938	339.909	124.343	185.234	20.4507	25.1167	26.9304	26.7844	25.3548	27.05	28.534	54.1717	210.726	247.752	355.024	178.91	71.0659	27.095	28.3409	28.6945	28.1173	27.9878
1285	0.6	0.7	3	1.89832	2.50226	2.50131	10.6009	38.8342	5.39614	3.7352	2.2831	3.60085	3.73114	4.06673	24.1489	2.58724	15.8041	19.229	11.1886	8.01487	79.0285	35.494	24.2002	6.70225	6.9244	8.11623	5.27253	5.21992	5.33421	3.77664	5.83449	15.4986	6.55052	3.71674	2.27614	2.2002	2.27674	3.6698	4.91407	24.5591	34.8997	38.9695	9.40394	21.6499	1.9004	3.79273	3.7411	3.62032	3.68955
1266	0.4	2	0.3	15.5444	11.4938	10.9978	11.0381	13.1476	9.79365	11.1949	11.0588	10.5702	10.9351	10.5643	10.9041	10.8611	10.1604	12.1057	11.0236	11.2056	12.0335	11.4174	10.538	10.1401	10.6068	10.7922	10.8601	10.7222	10.0665	10.8998	10.7125	11.9326	9.68026	10.1023	9.89338	9.49779	9.85549	9.71958	14.6448	10.5544	13.9527	10.2808	9.07169	14.0947	8.8362	11.45	11.6072	11.0562	11.325
1176	1.5	0.2	0.1	12.9767	25.0748	16.7473	25.6842	38.1429	23.4632	23.2828	19.133	157.357	53.3401	189.431	124.754	21.3088	20.2036	47.8711	23.5644	21.7168	25.9346	29.8815	22.194	19.2753	49.7009	16.0315	21.6956	25.0937	21.1883	20.4359	19.3619	98.5135	154.454	62.5326	49.0866	31.3059	21.1647	19.8271	21.3738	33.1932	62.5971	28.2707	20.517	23.8849	24.7071	33.878	28.0563	18.3219	120.78
924	10	1	0.4	14.9112	23.8334	41.66	27.076	18.4466	23.8374	17.7276	20.4576	21.8265	24.1691	17.8537	30.9664	22.3987	57.3736	22.7895	29.8098	19.4424	22.9979	125.63	15.5622	18.7874	19.7563	23.8305	17.9721	19.129	82.0911	117.91	47.2343	76.0068	49.9068	78.5366	29.9168	29.0351	28.8759	50.0014	79.5191	38.7359	70.0183	63.825	99.0704	30.3495	18.2992	19.129	19.4317	19.2282	20.2905
758	8	0.4	0.1	72.5024	60.0514	67.5104	64.9851	65.8014	60.1326	64.2021	64.281	62.8625	64.6117	62.8004	64.8215	64.415	58.0564	63.6291	61.8289	63.0498	50.1267	65.1055	69.424	66.4887	72.6636	65.162	66.0212	65.3002	57.0138	62.8996	60.6434	62.7231	67.307	62.6967	61.6718	60.4853	67.4426	65.3924	66.7068	67.9758	60.6195	67.6302	64.5078	65.0997	63.5961	66.5606	64.4852	62.8287	66.6803
1257	0.1	10	0.1	0	0	0	0	0	0	0	0	0	0	0	0	0	0	0	0	0	0	0	0	0	0	0	0	0	0	0	0	0	0	0	0	0	0	0	0	0	0	0	0	0	0	0	0	0	0
895	0.3	0.3	0.1	2815.99	2628.93	2757.42	3047.86	3088.29	2917.41	2913.84	2548.88	2293.79	2492.73	2227.1	2301.29	2296.95	2073.61	2292.38	2218.4	2282.85	2190.14	2255.84	1984.93	1981.3	1936.95	1989.59	1979.47	1972.5	1995.04	2100.35	2195.22	2285.31	2320.46	2258.56	2365.13	2319.82	2458.23	2419.01	2486.08	2521.17	2287.94	2699.69	2875.65	3321.5	3006.13	2907.66	2810.69	2657.74	2707.61
1317	0.3	6	0.2	6.20306	8.7808	9.36179	9.36488	19.5132	6.04244	6.69227	211.498	26.4379	14.3571	13.0199	24.4155	12.3744	8.54917	8.62809	8.78304	12.076	74.8152	27.9785	15.0713	10.8459	49.8829	19.26	10.7883	9.33015	12.1281	9.42087	8.42161	9.14093	8.5626	8.81425	8.37017	8.41288	9.02437	8.61801	8.88002	7.05791	8.11376	8.17496	7.60519	7.12591	8.37275	13.123	6.3736	7.47903	9.56893
1242	1.5	10	0.5	4.10914	5.39919	5.61052	4.61608	5.73045	5.30135	5.29124	5.10328	208.617	199.534	46.2621	49.8173	48.2243	37.6049	33.845	27.9754	8.40804	4.64372	5.69215	8.19354	6.77672	4.6383	5.4958	5.65142	6.29451	4.65563	5.47391	4.32868	5.44381	5.07234	5.00025	4.78921	4.60732	4.65362	4.8299	9.74201	9.04075	23.0615	19.8489	31.2009	3.59888	4.93736	4.78384	4.37377	4.40437	11.5828
107	5	0.3	0.7	106.995	82.384	83.7282	67.7788	67.4208	67.0395	60.4719	10.1158	8.02361	8.15804	7.34821	67.6548	72.1862	64.3657	63.6764	46.9197	47.1985	14.504	10.0559	8.32242	6.20732	6.47112	59.5998	141.004	127.739	208.064	149.823	92.0926	88.6025	87.4577	83.572	76.4664	67.2957	38.2775	24.313	132.762	83.3378	109.788	208.271	64.1588	94.6287	84.4002	83.4533	76.5136	67.4634	40.1871
1841	3	0.1	0.2	279.649	134.227	157.772	135.107	72.5639	45.0148	50.4463	49.2282	48.2251	46.0801	51.2195	88.9597	155.017	155.2	81.2664	83.8525	79.4904	78.9134	51.071	10.3603	8.76971	7.21332	7.72038	56.4524	133.244	140.528	115.134	155.922	89.2322	76.879	76.0208	55.1287	10.0397	9.29116	55.7399	122.982	65.5794	103.347	94.7924	118.006	111.345	66.38	75.9996	73.7752	56.1805	13.4393
907	1	0.9	2	254.422	215.781	291.925	238.319	156.043	125.054	83.5789	80.0783	86.2648	80.295	78.0901	80.6467	79.0515	83.8019	76.2194	86.2354	76.0605	76.7502	80.9643	81.2259	76.2477	78.2781	78.2226	74.7758	75.7825	97.9889	486.367	370.67	410.063	368.344	259.984	173.28	135.955	125.06	206.57	392.491	272.584	445.884	648.699	867.408	538.619	300.927	277.668	176.905	138.95	215.328
80	3	0.2	0.7	430.129	300.669	290.78	264.21	177.514	96.6192	22.7384	30.8238	34.0093	32.2492	112.352	349.061	214.288	306.673	270.809	205.196	134.442	170.268	32.9433	29.5265	43.0134	78.2338	159.281	477.348	339.587	541.761	366.504	355.954	234.473	116.082	23.6635	32.988	40.4529	144.618	180.317	334.072	450.327	524.466	466.265	234.14	258.998	108.032	96.5895	33.6107	26.4935	40.0847
1236	0.2	0.1	2	0.874235	1.27852	1.35383	1.26961	1.47339	1.34713	1.15419	1.01128	1.08793	1.22722	1.19301	2.40066	1.24064	1.13215	1.57622	1.25403	1.22908	1.24755	1.18181	1.13739	1.10769	2.66213	0.924027	1.3447	1.35082	1.34426	1.47699	1.36484	1.53055	1.8713	1.18697	1.42605	1.35297	1.41835	1.39657	1.48038	1.54126	1.5495	2.54791	3.26996	3.09212	2.92495	2.88685	1.40348	1.34775	1.42968
981	5	7	0.2	124.557	126.169	400.78	377.683	166.218	121.88	110.481	111.424	111.018	112.038	111.777	92.2518	112.21	91.1789	112.329	91.9447	122.273	77.8361	21.0733	11.9101	11.7662	12.2613	12.4049	12.9694	49.7688	14.3594	35.6015	10.1603	13.2289	29.5329	39.4906	31.7684	51.3762	32.1897	31.8812	32.3177	32.4108	54.2425	80.4357	50.0947	47.6545	49.9008	80.9034	51.8357	71.4558	52.3456
1093	0.6	3	1.5	19.8105	22.4895	21.8681	20.3355	23.0281	19.7825	19.4269	19.4591	19.6535	23.487	168.455	193.614	27.3869	56.9483	35.1074	36.432	89.3308	64.1768	41.8461	34.331	17.327	26.347	20.5836	26.2086	211.493	55.1593	81.3616	37.7619	109.963	62.1682	42.1976	28.8704	22.7717	18.8457	19.5952	173.08	43.0774	58.7005	71.4229	49.5065	197.475	41.9767	29.6538	22.3511	17.4014	19.304
1709	0.4	4	0.6	170.407	18.407	173.359	105.314	76.4684	44.1456	21.3889	60.8869	17.632	19.3295	21.7085	20.4392	25.4116	83.6999	89.6333	50.8252	122.897	150.072	16.3815	17.2546	19.1753	22.8048	18.2241	26.7995	194.22	95.4144	201.449	47.9441	21.7956	63.5749	75.3109	18.7753	18.4079	20.221	25.9717	87.9145	21.9238	109.658	92.6406	183.194	42.0038	53.1985	84.9677	17.4278	17.8375	19.8636
1017	4	1	2	39.2487	52.8499	58.0369	31.8361	49.1923	21.1203	7.7986	6.75697	4.74884	4.93482	5.6018	4.68089	6.30148	17.0265	19.3832	4.30832	58.1062	34.9258	29.2107	8.27623	5.95859	7.34865	5.75468	28.2782	74.2902	115.654	83.9006	58.7587	53.3057	54.2812	52.0415	59.7405	24.5333	23.8548	60.4459	277.136	186.056	67.0426	68.7715	154.445	93.8286	50.0684	58.7901	55.1005	49.6448	11.0517
1194	8	0.4	3	17.3958	19.857	16.9281	16.1692	16.8026	15.4128	8.71193	5.75422	5.9799	11.3571	9.7432	12.7953	11.1279	8.55441	11.7592	11.2394	11.0337	9.95363	8.30915	6.76503	5.8797	90.2245	37.0231	27.7271	38.9105	18.5062	17.585	16.8767	111.313	24.8298	25.8429	21.9281	16.4955	17.2671	16.7639	17.7156	17.7329	16.9096	18.5089	15.5538	10.678	9.22728	7.76467	6.42307	4.78569	4.44464
[truncated: 434 more columns]

## Sheet: Storage(WG inflow-No Demand)
grand_id	p1	p2	p3	1980-01	1980-02	1980-03	1980-04	1980-05	1980-06	1980-07	1980-08	1980-09	1980-10	1980-11	1980-12	1981-01	1981-02	1981-03	1981-04	1981-05	1981-06	1981-07	1981-08	1981-09	1981-10	1981-11	1981-12	1982-01	1982-02	1982-03	1982-04	1982-05	1982-06	1982-07	1982-08	1982-09	1982-10	1982-11	1982-12	1983-01	1983-02	1983-03	1983-04	1983-05	1983-06	1983-07	1983-08	1983-09	1983-10
610	0.4	0.5	0.1	36700	36700	36700	36700	36700	36700	36700	36700	36700	36700	36700	36700	36700	36700	36700	36700	36700	36700	36685.7	36500.8	36235.4	35992.8	35772.6	35566.3	35372.2	35396.5	35861.2	36280.2	36187.8	35888	35548.5	35182.5	34853.7	34562.4	34310.1	34222.4	34448.8	34871.8	35760.2	36667.1	36686.6	36493.5	36198.7	36248.1	36515.8	36695.5
753	0.6	0.5	0.4	18451.2	18571.2	18738.4	19143.9	20136.4	20942.3	21045.4	20581.8	19876.2	19304.6	18932	18561.4	18335.5	18154.5	17955.5	17867.8	17984.5	19214.2	19755.6	19366.7	18693.7	18079.8	17662.1	17307.5	16997	16805	16674	17627.4	20059.2	21463.8	21649.3	21064.4	20728.6	20592.1	20717	20948.6	21076.7	21083.4	21077.9	21078.9	21095.8	21568.4	21428.3	20745.9	20154.8	19703.1
870	8	0.5	0.5	20338.8	20459.5	20568.6	20690	20702.4	20684.5	20469.2	20309.4	20307.9	20323.7	20312.9	20315.6	20312.9	20312	20318.6	20321.2	20315.2	20308.7	20284.2	20122.9	19776.7	19538.8	19356.6	19233.7	19106	18957	18844.5	19940.2	22024.3	23256.2	23602.8	23605.3	23567.7	23599.3	23726.8	23839.2	23894.1	23879.2	23913.7	24223.5	24680.6	24810.5	24665.5	24447	24345.2	24315.8
597	0.3	0.9	0.1	15576.2	16222.7	17475.2	17504.3	18996	20938	20184.7	17972	16804.5	16219.6	15954.6	15769.4	15517.5	15148.8	14624.2	14092.3	14390.2	14869	14506	13669	12623.8	11349.9	10367	9914.43	9501.38	9103.58	8980.74	9637.7	10986	12916.7	13362.8	12801.2	12007.8	11471.3	11300.9	11316.3	11376.8	11508.7	12361.6	14235	16222.9	18381.8	18228.2	17325.6	16815.9	16416.1
307	0.2	0.4	0.1	10217	9824.53	9453.52	9000.39	8696.25	8314.74	7955.9	7251.3	6449.3	5840.07	5398.51	5017.58	4656.05	4329.35	4065.48	4059.4	4526.4	6228.97	6379.7	5875.22	5236.58	4754.16	4423.38	4202.85	3984.15	3783.89	3866.19	4871.55	6202.84	8031.77	9135.98	8911.46	8414.75	7994.78	7715.55	7505.84	7328.39	7190.8	7045.76	6944.84	6874.06	6711.19	6325.2	5717.87	4998.89	4381.29
1753	0.6	10	0.3	7541.33	7560	7560	7560	7560	7560	7560	7548.01	7417.01	7265.02	7065.1	7135.45	7236.74	7556.21	7560	7560	7560	7560	7503.71	7011.8	6280.18	4758.76	742.505	616.926	903.852	1885.63	1900.78	1761.84	1259.79	679.342	672.614	678.361	665.901	669.324	658.27	981.67	2061.25	1718.35	1754.97	1764.88	1844.26	1968.68	1201.99	670.808	667.936	672.884
297	9	0.8	0.7	6262.66	5786.27	5073.28	4320.44	5281.53	7055.46	7415.9	7308.31	7306.55	7179.16	6946.61	6650.59	6350.6	6151.48	5984.67	5774.77	6481.88	7434.2	7434.2	7399.22	7167.99	6934.97	6640.72	6229.94	5800.49	5202.49	4441.39	3729.55	3511.92	4552.58	5474.73	5478.44	5471.26	5617.58	5496.81	5056.62	4325.34	3655.46	2431.65	633.996	582.913	624.221	627.33	612.962	544.381	439.205
1036	7	0.9	0.4	2889.57	3024.04	3228.65	3450.92	3567.37	3579.59	3458.6	3298.82	3144.04	3004.71	2873.23	2764.21	2059.68	413.872	278.619	123.88	4.69441	0.00590337	0	0	0	0	0	0	1.67095	200.296	383.893	276.923	104.429	2.89862	60.2665	125.658	185.265	225.294	257.369	307.013	601.459	577.074	510.674	565.888	261.449	471.023	520.486	524.8	514.812	502.794
989	0.3	2	0.5	4113.19	4246.55	4439.27	4447.59	4440.02	4444.7	4462.96	4420.48	4351.46	4253.36	4154.32	4092.63	4077.91	4049.97	4137.93	4179.27	4255.05	4420.91	4451.37	4440.16	4441.55	4433.69	4417.64	4437.91	4432.79	4425.25	4443.44	4445.23	4427.51	4436.6	4444.4	4438.16	4439.12	4441.49	4439.83	4412.39	4442.24	4431.43	4435.92	4424.54	4433.96	4447.11	4442.21	4436.36	4447.72	4382.72
1135	8	1.5	0.2	4430.07	4379.03	4354.94	4296.89	4234.62	4313.72	4287.57	4175.43	4048.34	4204.87	4273.86	4290.22	4282.43	4257.1	4369.73	4378.93	4280.91	4401.63	4284.8	4258.9	4215.83	2797.07	1444.56	670.768	599.84	560.138	610.3	611.672	573.204	628.067	614.366	613.276	611.539	614.293	610.188	601.396	605.016	580.694	612.633	610.76	593.764	615.057	613.091	613.628	587.962	538.972
1269	0.8	0.1	0.1	4965.08	5474.23	5802.6	6165.63	6287.7	6284.04	6172.15	5963.66	5700.14	5461.26	5253.2	5042.63	4820.52	4626.19	4345.34	1571.83	554.769	563.273	603.012	554.482	546.354	488.318	433.416	387.296	359.97	399.475	528.903	564.552	597.607	595.882	599.306	607.185	554.845	515.959	480.369	546.344	604.696	564.645	596.958	594.835	570.77	602.089	591.111	586.406	599.823	579.84
1077	5	0.3	0.1	4718.6	4718.6	4718.6	4718.6	4718.6	4718.6	4718.6	4718.6	4718.53	4718.41	4716.92	4718.09	4714.59	4709.75	4718.6	4718.47	4718.2	4718.6	4713.79	4715.39	4713.93	4712.07	4718.6	4718.6	4718.6	4718.6	4718.6	4718.6	4718.6	4718.6	4718.6	4718.6	4718.6	4718.6	4718.6	4718.6	4718.6	4718.6	4718.6	4718.6	4718.6	4718.6	4718.6	4718.6	4718.6	4718.6
1026	0.4	0.2	0.1	2022.6	2274.52	2599.55	2903.92	2922.64	2883.21	2969.41	2872.7	2833.04	2839.33	2862.6	2154.98	1954.63	2111.06	2305.46	2420.29	2578.03	2832.8	2853.32	2884.57	2881.74	2733.06	2553.38	2718.81	2829.6	1318.45	874.175	414.809	410.093	409.152	406.801	373.559	226.436	224.39	203.338	415.259	415.37	408.318	396.55	371.57	401.867	410.161	402.434	416.845	413.85	360.529
740	1.5	3	1	2713.14	2718.02	2702.63	2639.85	2515.22	2392.41	2291.43	2248.58	2296.45	2295.5	2309.34	2316.14	2303.62	2285.35	2248.01	2201.16	2130.3	2138.85	2122.88	2066.41	2058.06	2113.42	2111.39	2126.81	2154.19	2166.24	2143.94	2109	2058.51	2014.51	1982.73	1951.35	1916.96	2008.52	2029.44	2030.7	2023.51	2006.82	2005.4	1966.03	1888.22	1844.71	1812.67	1762.15	1819.38	1873.88
1294	1.5	1.5	0.1	1712.52	1651.39	1465.66	652.556	357.719	337.056	302.006	271.665	174.136	121.316	105.701	119.082	145.396	169.428	249.674	378.28	384.572	357.469	387.738	385.329	384.274	379.671	383.151	383.906	383.554	383.303	384.48	386.954	381.067	387.347	391.274	386.829	377.935	365.32	350.308	336.923	339.19	370.076	382.549	388.702	387.102	384.543	383.222	370.261	358.508	340.689
1848	1.5	0.7	1.5	3050.57	3113.05	3366.71	3708.36	3682.65	3582.93	3461.58	3332.47	3201.96	3076.54	2984.08	3042.97	2979.72	3012.06	3018.45	3047.9	2982.83	2888.43	2811	2708.98	2462.71	1543.29	1171.88	787.123	501.522	567.955	563.891	538.075	522.542	398.496	365.092	365.064	362.415	360.025	350.377	628.308	1039.53	1098.2	1094.74	1040.11	1127.04	1176.44	1001.12	789.736	581.839	392.82
1869	0.8	2	1.5	2493.53	2865.76	3210.77	3357.7	3355.26	3299.89	3197.4	3065.45	2920.02	2774.52	2626.04	2481.11	2309.81	1409.36	1289.8	1298.52	1226.3	1111.01	983.47	844.459	704.828	559.365	411.767	331.047	328.633	442.32	591.697	818.666	1139.25	1096.32	989.798	863.037	730.968	598.509	460.428	1147.87	1792.28	1661.5	1417.47	1323.22	1300.07	1314.41	1271.52	1173.42	1050.5	912.774
1863	0.6	0.5	0.1	2635.99	2805.45	3024.4	3147.57	3119.85	3082.17	3015.08	2921.78	2821.97	2735.04	2653.79	2595.88	2527.39	2552.84	2597.25	2556.16	2483.81	2400.84	2307.55	2189.31	1915.99	1628.71	1365.7	1159.75	1226.28	1349.98	1364.02	1257.47	1213.84	1173.36	1110.82	1046.39	976.034	902.174	823.003	886.494	1057.14	1205.71	1255.7	1261.2	1246.78	1210.99	1156	1086.4	1021.72	955.225
1770	8	1	0.6	213.745	272.217	282.523	304.435	281.198	248.95	195.564	131.473	63.5355	5.75347	0	0	0	31.2028	122.772	133	133.369	95.8695	75.7322	25.983	0	0.0248016	0	4.17105	133.092	288.109	293.842	299.213	266.58	221.137	162.037	98.1018	33.771	0	0	59.6079	195.351	270.047	301.521	297.51	267.498	243.101	219.411	159.761	95.8994	28.7746
965	0.7	4	1	2413.6	2444.71	2533.3	2779.94	2784	2783.36	2759.4	2701.88	2636.92	2574.96	2512.54	2456.17	2401.95	2348.11	2296.22	2258.73	2226.18	2208.27	2159.87	2070.13	2029.33	1989.59	1887.06	1544.3	1334.1	681.459	261.208	271.026	253.292	269.818	268.001	267.854	265.908	251.52	227.048	194.491	160.933	166.224	204.357	265.541	266.69	259.794	271.294	258.102	229.562	186.48
1247	2	2	0.5	2575.7	2529.59	2487.9	2433.64	2380.01	2344.13	2283.35	2202.86	2120.99	2364.79	2389.38	2539.86	2590.14	2581.15	2586.67	2589.14	2587.03	2567.36	2537.49	2507.61	2479.09	2546.57	2590.8	2590.8	2590.8	2590.8	2590.8	2590.8	2590.8	2590.8	2590.8	2590.8	2590.76	2588.16	2577.83	2563.16	2555.12	2576.94	2590.8	2590.8	2587.94	2582.99	2566.69	2526	2478.18	2428.29
7313	0.3	0.1	0.1	1228.28	1190.74	1256.39	1487.73	1817.15	2227.57	2223.19	1795	1446.52	1288.32	1264.86	1256.85	1255.42	1230.37	1346.84	1563.43	1887.67	2447.75	2348.49	1865.91	1471.78	1108.21	886.607	709.686	624.284	542.145	875.438	1826.16	2506.39	2529.9	2419.85	1984.68	1613.88	1493.63	1514.36	1548.5	1659.3	1752.06	1878.2	2187.91	2343.46	2323.34	2101.24	1736.86	1484.13	1336.51
1287	7	0.1	0.8	1544.41	1635.45	1666.05	1642.77	1657.67	1660.6	1658.18	1705.61	1600.45	1584.28	1689.16	1645.11	1646.33	1652.11	1658.42	1667.06	1651.94	1524.61	1674.81	1657.6	1649.59	1600.1	1672.83	1655.84	1672.75	1633.71	1659.76	1657.29	1613.11	1667.79	1659.77	1670.2	1643.57	1650.56	1655.61	1562.23	1671.82	1581.78	1667.9	1670.09	1584.55	1657.44	1647.35	1664.54	1650.27	1666.3
1186	0.7	0.6	3	1443.13	1642.23	1690.81	1666.71	1675.26	1637.16	1613.08	1573.25	1526.95	1483.36	1441.45	1401.47	1359.94	1320.55	1281.27	1243.66	1213.25	1273.24	1290.11	1267.93	1240.98	1213.05	1189.6	1169.32	1147.07	1154.01	1172.95	1166.27	1151.46	1129.22	1098.21	1058.15	1012.44	940.306	833.572	885.343	955.882	995.935	1142.49	1209.53	1208.66	1197.45	1175.33	1139.26	1096.35	1052.04
1042	0.6	0.2	0.1	1494.6	1480.14	1484.57	1487.72	1467.58	1429.12	1380.18	1328.08	1276.18	1229.63	1186.12	1135.48	1090.23	1040.06	1013.49	985.433	886.862	733.27	640.887	524.706	407.235	287.436	236.75	239.388	203.641	252.481	293.612	248.049	241.501	226.159	234.206	234.78	233.427	230.092	218.866	373.157	463.622	391.303	303.981	238.215	243.296	242.866	242.074	243.266	240.87	223.378
884	7	0.1	0.3	503.29	576.261	559.71	514.923	549.604	575.854	501.839	602.657	546.869	565.191	617.944	607.348	508.519	525.837	576.601	623.168	607.448	499.302	538.473	660.272	505.946	710.181	460.289	752.663	428.02	746.77	467.649	737.056	453.612	759.747	424.414	584.337	568.879	555.221	568.21	566.787	567.588	595.419	551.895	577.515	566.707	569.605	545.042	521.319	524.826	548.918
1273	1	8	0.1	1066.94	1074.6	1082.36	1085.04	1093.88	1112.58	1099.42	1081.83	1011.39	966.418	953.72	969.666	988.92	997.817	1023.27	1056.92	1069.15	1092.1	1112.57	1106.6	1098.42	1121.65	1163.45	1179.36	1191.14	1218.77	1258.38	1303.76	1398.16	1497.43	1536.12	1553.96	1560.46	1562.46	1561.88	1560.4	1564.06	1586.28	1611.02	1617.46	1617.27	1616	1610.9	1599.2	1584.99	1570.99
961	0.1	1	0.4	0	0	0	0	0	0	0	0	0	0	0	0	0	0	0	0	0	0	0	0	0	0	0	0	0	0	0	0	0	0	0	0	0	0	0	0	20.7345	51.1095	87.081	213.341	228.358	227.619	227.519	227.517	227.155	225.62
1144	0.3	10	2	155.555	169.182	170.79	166.201	164.354	171.688	180.58	180.607	146.421	140.326	174.944	143.368	160.603	162.219	165.119	167.438	160.417	156.209	178.812	170.176	168.724	131.826	177.995	175.71	158.289	146.186	178.669	170.795	131.402	171.012	181.427	171.28	164.655	164.588	162.624	165.887	198.205	154.065	172.088	172.096	159.175	179.259	167.016	170.264	168.89	167.689
616	10	0.3	0.1	1519.47	1695.61	2242.9	2154.77	1884.68	2242.9	2171.43	1665.24	1518.81	1519.33	1518.68	1519.54	1518.5	1517.81	1518.71	1519.31	1517.61	1520.42	1518.8	1524.85	1524.29	1524.29	1522.04	1519.13	1519.25	1523.19	1518.89	1518.13	1516.95	1518.63	1519.87	1521.66	1518.05	1519.16	1519.35	1518.34	1518.03	1519.5	1518.3	1518.88	1516.51	1518.23	1515.57	1518.28	1517.42	1518.13
911	8	0.9	2	1967.68	2166.7	2171.4	2171.4	2171.4	2171.4	2171.11	2150.64	2111.87	2059.63	1990.72	1912.91	1836.77	1759.75	1719.34	1663.76	1599	1458.26	1014.51	283.916	192.3	167.022	136.709	138.158	160.587	140.493	199.441	195.849	187.011	198.936	193.004	197.249	191.95	190.272	185.03	183.299	197.535	172.39	425.053	1675.03	2171.4	2171.4	2171.4	2171.4	2171.4	2171.4
1006	0.9	1.5	0.3	624.569	458.348	372.703	293.383	229.357	203.888	200.978	197.385	193.85	189.372	187.616	188.985	188.171	195.19	202.759	198.119	179.939	199.765	205.062	203.807	204.776	194.74	196.734	194.265	181.554	200.337	207.95	203.766	203.544	174.705	189.084	180.784	161.249	169.316	176.185	216.749	208.507	192.953	201.312	191.859	246.158	218.226	204.02	204.618	203.589	202.8
1048	9	0.8	0.3	1322.89	1326.3	1335.88	1327.55	1352.56	1345.6	1367.41	1353.2	1359.81	1342.59	1354	1360.3	1338.74	1347.26	1342.87	1345.04	1356.68	1359.94	1340.56	1406.73	1311.05	1321.22	1182.5	1336.93	1350.44	1298.57	1369.28	1348.93	1322.08	1356.5	1358.1	1361.65	1342.31	1363.57	1347.59	1333.43	1342.77	1340.36	1331.36	1350.24	1339.22	1351.96	1351.58	1360.09	1353.44	1341.33
1123	0.5	8	0.3	1071.85	1081.87	1088.77	1070.3	1050.77	1029.33	991.485	945.917	903.306	933.957	935.881	937.902	921.787	904.231	902.611	889.454	871.364	902.805	908.481	883.092	850.347	816.599	738.887	526.159	307.11	184.762	182.125	187.917	184.743	195.721	194.95	194.203	193.35	192.373	184.373	164.701	194.495	159.137	162.645	189.62	174.824	194.914	184.683	187.495	185.001	181.333
1032	9	0.8	0.2	1600.71	1667.72	1826.2	1923.3	1923.3	1923	1906.16	1865.55	1817.33	1762.42	1703.52	1641.6	1573.92	1506.22	1449.17	1404.92	1365.75	1381.68	1389.45	1357.54	1341.97	1339.21	1416.44	1504.54	1523.77	1684.19	1799.51	1848.02	1885.57	1923.3	1923.3	1923.3	1923.05	1915.35	1894.34	1888.06	1923.3	1923.3	1923.3	1923.3	1923.3	1923.3	1923.3	1923.3	1922.35	1918.76
1774	0.7	1.5	0.3	1260.17	1503.9	1875.21	1900.8	1900.8	1895.65	1855.93	1780.51	1688.98	1588.87	1482.33	1375.9	1164.71	888.739	824.69	853.022	843.296	794.778	413.272	74.1447	7.2275	0	0	0	43.7478	142.018	145.992	162.269	148.113	123.651	95.8938	39.1778	0.462232	0.000897643	0.434123	89.6785	148.131	130.338	147.48	136.232	141.32	151.201	146.821	115.184	55.9393	2.51717
1781	4	9	0.5	1657.42	1900.8	1900.8	1900.8	1900.8	1900.8	1895.52	1848.52	1766.85	1668.1	1560.83	1456.39	1385.76	1600.08	1900.8	1900.8	1900.8	1900.68	1880.04	1798.63	1690.9	1571.74	1448.63	943.718	152.021	563.919	695.753	599.083	266.483	178.335	178.201	175.954	178.4	180.018	159.445	170.41	222.707	342.237	673.109	699.146	657.367	384.689	179.793	177.932	176.367	183.37
355	10	0.1	0.2	172.603	171.547	172.043	221.975	602.731	848.429	706.491	426.654	204.448	161.161	169.244	172.02	172.465	171.191	172.31	262.372	685.47	1148.68	985.652	659.686	379.454	189.618	167.355	170.281	172.678	171.86	171.41	206.677	432.035	673.403	617.156	364.645	175.46	163.676	168.496	177.258	205.398	237.003	321.173	516.455	1262.32	1742.21	1484.67	1089.96	705.494	498.899
1101	0.5	0.7	4	1340.65	1415.77	1568.89	1706.9	1705.26	1677.68	1621.12	1548.4	1470.79	1388.62	1296.46	1287.3	1289.17	1319.21	1357.11	1404.98	1398.65	1368.04	1335.23	1283.08	1219.17	974.303	674.671	602.908	548.301	631.935	677.459	667.165	678.076	667.07	638.478	597.271	549.561	499.545	443.224	699.917	944.223	901.832	748.147	673.392	692.473	685.362	672.178	640.875	597.514	547.469
1023	1	10	0.1	1089.58	1084.5	1092.08	1100.36	1099.93	1104.09	1109.17	1107.06	1098.03	1103.66	1102.65	1099.32	1103.78	1096.51	1105.45	1095.58	1104.87	1095.63	1103.19	1095.4	1131.46	1133.92	927.689	907.254	952.226	1028.78	1117.77	1095.39	1095.41	1103.05	1118.32	1092.44	1133.86	1074.96	1068.67	1055.77	1042.8	1055.26	1083.47	1082.79	1112.34	1099.33	1105.94	1101.27	1105.25	1105.27
1060	0.5	4	0.3	116.108	133.14	147.283	150.453	149.029	149.805	148.741	147.709	145.386	144.38	140.612	108.084	105.958	127.713	149.327	149.635	147.944	149.506	149.798	147.678	150.035	147.886	149.15	145.835	142.854	180.806	177.178	149.645	149.616	145.952	150.476	149.298	149.4	146.446	142.01	270.734	285.174	200.861	159.636	146.367	153.974	151.428	149.512	148.991	149.66	149.578
1864	1	1.5	1	1000.41	1127.86	1352.96	1496.8	1494.88	1461.12	1393.72	1308.45	1217.96	1115.06	1024.59	961.157	933.635	908.794	917.057	915.034	877.482	815.12	742.05	660.429	504.914	212.431	123.454	101.075	80.841	129.292	144.921	139.906	146.837	145.214	144.883	141.461	143.983	141.372	138.529	409.355	925.493	1198.75	1381.78	1485.74	1496.8	1495.24	1461.43	1390.97	1307.84	1219.92
1797	5	0.2	0.1	1449.3	1449.3	1449.3	1449.3	1449.3	1449.3	1449.3	1449.3	1449.3	1449.3	1449.3	1449.3	1449.3	1449.3	1449.3	1449.3	1449.3	1449.3	1432.72	1307.45	1129.08	292.894	116.846	106.059	157.175	260.54	269.268	397.51	176.706	117.288	118.135	116.481	116.556	115.842	112.486	198.521	336.558	243.628	310.182	240.954	349.339	464.107	184.127	118.298	124.383	117.194
305	5	0.4	0.8	854.706	851.31	840.341	828.309	813.534	863.454	868.747	860.535	831.371	848.104	838.903	811.572	852.957	827.133	866.298	843.697	807.589	832.503	869.237	872.549	833.413	832.703	852.3	832.663	850.149	796.56	858.98	833.465	836.74	847.172	865.361	883.942	837.486	831.379	845.832	834.768	831.482	857.124	846.264	851.432	842.914	842.333	849.231	862.695	840.329	849.602
968	10	8	0.1	1412.3	1412.3	1412.3	1412.3	1412.3	1412.3	1412.3	1412.3	1412.3	1412.3	1412.3	1412.3	1412.3	1412.3	1412.3	1412.3	1412.3	1412.3	1412.3	1412.3	1412.3	1412.3	1412.3	1412.3	1412.3	1412.3	1412.3	1412.3	1412.3	1412.3	1412.3	1412.3	1412.3	1412.3	1412.3	1412.3	1412.3	1412.3	1412.3	1412.3	1412.3	1412.3	1412.3	1412.3	1412.3	1412.3
1019	1	6	1.5	870.939	842.764	852.423	872.986	861.591	834.639	805.775	774.867	743.797	712.438	681.141	649.586	617.294	577.987	534.281	450.06	335.285	239.86	200.597	141.124	137.643	134.879	131.133	126.302	124.448	140.18	166.531	147.535	138.402	138.466	137.104	133.856	130.48	125.692	120.533	148.695	207.477	149.068	127.053	136.988	166.102	146.571	137.414	134.816	130.605	126.363
1302	4	3	0.3	553.521	550.797	550.169	549.166	545.441	542.531	535.773	508.956	497.913	512.481	525.34	549.501	544.312	545.148	548.822	552.225	551.876	551.396	555.187	554.06	553.951	553.361	553.687	548.511	551.437	552.526	554.244	553.718	550.804	548.833	539.103	528.805	522.254	517.842	515.141	513.411	515.656	528.078	547.259	555.1	553.605	552.769	549.771	546.008	542.255	539.469
1824	6	0.8	0.1	1363	1363	1363	1363	1363	1363	1363	1362.9	1319	1337.9	1246.35	1362.61	1361.49	1363	1363	1363	1363	1363	1298.05	647.332	97.3497	96.2364	94.2229	68.1602	127.622	237.158	253.095	238.191	267.93	224.348	94.0118	91.6031	96.7129	94.3288	88.3171	138.391	252.735	191.408	231.29	192.429	242.841	301.108	275.101	101.244	98.9167	94.9544
1316	1.5	0.1	0.2	0	0	0	0	0	0	0	0	0	0	0	0	8.16058	20.9076	41.1845	70.7342	134.349	196.07	262.557	259.707	256.367	251.629	257.709	254.948	247.981	239.809	232.01	222.952	210.665	191.664	178.323	166.983	157.907	148.333	141.32	133.749	128.286	124.999	122.314	119.12	115.873	114.011	112.201	109.128	105.088	102.154
1835	1.5	0.1	0.2	1318.6	1318.6	1318.6	1318.6	1318.6	1318.6	1318.6	1318.6	1313.43	1312.46	1241.75	1294.63	1318.35	1318.6	1318.6	1318.6	1318.6	1318.6	1261.23	756.671	72.6612	72.1393	72.5206	50.0643	91.2578	158.391	189.563	275.003	85.5992	66.6289	68.4172	63.7253	67.5086	64.0115	64.6816	84.8661	207.969	166.398	195.717	183.108	176.512	317.611	73.5667	71.9664	66.1647	72.0609
1847	2	0.1	0.2	1293.9	1293.9	1293.9	1293.9	1293.9	1293.9	1293.9	1293.9	1293.9	1285.45	1245.7	1290.16	1293.9	1293.9	1293.9	1293.9	1293.9	1293.9	1261.57	1039.74	265.531	106.848	109.602	92.0597	214.297	274.036	327.354	351.429	330.177	288.991	337.896	266.632	196.463	118.122	98.5504	208.344	328.942	234.629	307.328	280.185	296.223	346.94	390.197	366.038	203.313	106.802
1231	5	3	0.3	707.923	816.249	871.661	881.865	889.508	872.521	870.848	862.403	850.925	838.863	826.626	815.536	804.042	793.03	782.221	771.115	765.507	519.866	504.482	462.825	405.006	339.594	283.89	269.512	241.323	208.178	188.025	161.676	131.835	127.623	127.604	127.596	127.631	127.391	126.684	250.613	296.459	298.361	352.604	353.573	329.163	293.81	256.886	211.191	160.229	128.024
1140	0.9	5	0.8	1009.07	1003.73	1000.91	993.826	987.608	983.349	978.87	974.742	971.227	968.125	964.742	960.288	957.488	954.113	950.505	947.486	942.398	938.123	933.313	929.496	926.555	921.962	916.917	914.394	909.697	901.746	899.601	864.947	836.197	821.593	816.359	808.087	799.522	794.476	788.122	754.327	733.049	729.695	727.61	720.916	712.859	699.763	687.307	676.114	668.053	699.654
1296	10	0.5	2	678.356	690.186	690.94	685.603	679.188	673.517	660.673	644.844	629.217	615.249	601.001	586.098	570.282	554.35	544.033	532.827	520.96	533.291	543.897	533.459	522.657	511.301	524.66	531.306	525.399	518.263	511.347	498.36	493.703	493.054	474.588	451.782	428.098	406	383.601	374.21	373.231	385.533	414.51	437.741	445.163	462.102	448.924	430.026	410.559	389.453
1659	0.5	1.5	0.7	440.492	439.138	485.178	518.155	516.447	505.926	498.011	489.288	479.967	468.445	455.594	441.236	427.766	436.111	452.914	457.666	488.01	508.375	504.881	502.52	517.75	512.789	504.192	500.824	505.267	562.468	714.26	770.001	771.356	760.566	742.457	718.028	691.658	664.547	633.683	649.299	669.85	674.95	678.237	711.337	738.341	749.389	741.93	721.693	697.594	675.409
1277	0.9	7	3	482.84	484.799	485.9	486.927	480.385	475.86	473.443	469.715	467.362	467.226	466.816	474.298	479.788	486.87	497.102	499.158	499.392	497.497	499.747	499.469	499.285	499.366	499.542	499.991	496.899	495.124	496.614	496.443	495.703	499.658	498.912	497.447	496.138	495.142	494.639	495.029	497.215	493.015	497.26	499.669	499.449	499.308	499.453	498.557	497.263	496.682
1021	1	0.7	4	811.555	833.496	838.731	842.265	842.408	839.271	845.96	841.804	826.801	821.336	812.231	802.008	787.598	771.603	754.95	734.033	712.177	690.544	670.791	649.083	630.466	606.941	660.018	711.721	733.744	778.805	805.998	843.663	822.511	841.76	843.348	843.702	837.046	837.96	837.261	833.935	825.398	828.244	800.185	845.17	835.886	836.865	840.412	845.886	840.772	837.064
1280	0.7	0.1	0.4	1203.83	1188.18	1167.74	1144.18	1119.82	1094.75	1045.79	992.732	1130.33	1211.3	1211.3	1211.3	1211.3	1211.3	1211.3	1211.3	1211.3	1211.29	1204.88	1189.31	1184.17	1198.12	1211.3	1211.3	1211.3	1211.3	1211.3	1210.67	1210.55	1208.09	1207.85	1192.39	1177.24	1166.45	1159.15	1154	1149.22	1156.91	1168.17	1175.84	1167.6	1155.4	1132	1102.19	1072.83	1050.23
1120	1.5	0.8	4	799.49	803.089	805.664	806.563	807.028	804.96	801.916	799.127	797.492	797.263	797.248	798.093	797.714	796.857	796.299	794.398	792.312	789.831	784.951	781.277	778.951	777.834	777.309	776.214	774.965	774.825	774.543	774.255	787.793	807.032	806.717	806.667	806.723	806.67	806.731	806.699	806.639	806.488	806.548	806.578	806.672	806.584	806.914	805.364	803.788	815.907
182	0.2	0.5	0.1	918.765	1089.49	1097.81	1059.2	984.085	861.275	752.314	717.632	695.499	673.702	651.345	631.14	609.489	641.1	738.448	796.223	765.811	733.046	676.396	628.782	603.005	580.396	609.785	876.659	1096.9	1095.46	1101.07	1102.57	1094.09	1039.44	943.956	822.521	764.365	758.035	783.668	1012.82	1085.81	1100.66	1101.94	1097.38	1093.07	1043.16	935.485	810.384	764.986	758.787
7311	0.4	9	6	1044.92	1048.97	1049	1049	1049	1049	1048.99	1048.74	1047.49	1046.25	1045.09	1043.58	1041.16	1038.21	1034.88	1031.22	1027.9	1028.61	1036.45	1041.18	1042.82	1043.74	1048.02	1049	1049	1049	1049	1049	1049	1049	1049	1049	1049	1049	1049	1049	1049	1049	1049	1049	1049	1049	1049	1049	1049	1049
1755	1.5	1	0.8	60.3263	87.4314	99.6971	102.497	97.3957	98.1791	97.5712	97.7507	96.9436	92.6305	86.787	82.72	86.1515	83.5877	96.9251	88.2228	95.2616	95.1149	98.2386	97.9178	96.0283	95.6752	93.8593	86.2329	106.585	142.006	142.715	97.019	97.9595	98.137	97.9724	97.8084	55.567	67.4729	67.7845	85.1205	98.4537	98.0567	96.4851	93.3946	157.765	230.659	156.459	98.0141	98.4731	94.9594
1152	0.1	4	0.7	0	0	0	0	0	0	0	0	0	0	0	0	0	0	0	0	0	0	0	0	0	0	0	0	0	0	0	0	0	0	0	0	0	0	0	0	0	0	0	0	0	0	0	0	0	0
1192	0.5	10	3	616.194	596.29	625.188	626.143	625.194	625.966	626.076	626.101	628.955	626.543	622.917	624.839	623.681	624.425	622.221	624.91	627.472	620.631	628.76	628.547	624.015	621.601	629.171	627.073	620.245	620.484	626.477	624.77	626.952	624.788	620.743	626.25	622.807	622.338	627.026	578.909	531.911	523.41	622.326	628.995	626.604	624.918	624.165	626.15	617.667	633.225
541	10	0.1	2	302.418	236.423	173.009	110.913	584.316	922.396	865.458	719.996	602.659	523.187	448.283	376.097	303.174	234.095	166.596	110.828	348.28	456.913	406.978	329.51	249.376	172.505	105.465	90.8342	90.8093	90.963	90.7787	89.3377	536.392	912.56	851.338	699.956	592.289	512.052	434.217	357.846	281.79	210.955	141.611	91.7855	291.865	891.471	868.697	724.389	603.002	516.601
1822	6	0.5	0.1	909.4	909.4	909.4	909.4	909.4	909.4	909.4	909.4	909.4	909.4	909.14	909.4	909.4	909.4	909.4	909.4	909.4	909.4	886.837	715.999	49.0257	55.5581	51.4397	38.1853	70.0821	103.309	134.755	151.822	55.6272	52.9443	52.2642	54.2099	53.5452	53.2939	45.2835	71.9171	155.218	118.586	138.132	128.068	158.331	247.572	65.0892	60.8403	53.8769	51.0387
972	1.5	6	0.1	901.723	907.8	907.8	907.8	907.8	907.8	907.8	907.8	907.8	907.651	904.442	897.177	886.64	874.447	860.661	845.508	847.007	889.976	906.065	907.141	901.504	890.288	875.826	859.748	844.831	834.83	849.376	881.707	899.285	907.8	907.8	907.711	904.134	894.683	881.454	866.502	850	835.026	839.308	907.013	907.8	907.8	907.8	907.8	906.052	897.216
613	0.5	6	2	352.677	376.09	496.884	696.461	890.6	890.591	791.63	560.803	424.827	349.76	351.999	352.648	352.861	352.629	354.762	472.11	617.391	595.764	470.639	325.876	234.681	173.79	131.908	96.1405	87.5621	87.9313	167.819	355.25	659.608	792.555	613.34	438.463	320.116	258.739	206.661	188.21	188.694	195.663	370.669	589.178	798.341	886.71	747.844	533.536	389.628	307.064
1086	0.5	0.2	1.5	429.873	427.21	424.471	421.261	417.002	409.639	398.449	386.773	376.883	367.564	362.448	359.675	356.799	352.218	333.605	313.504	299.091	286.707	235.646	188.026	151.254	95.2596	85.861	84.2094	82.5954	81.1246	79.7542	78.2956	76.9235	75.5903	74.0245	71.179	65.4479	53.7559	50.2469	49.1177	48.4574	54.4401	65.4883	76.4298	77.4947	76.2734	74.8117	73.5466	72.1132	65.8634
1295	7	0.2	0.1	205.48	157.277	130.024	86.8524	83.2064	85.5951	85.5129	85.7988	84.718	84.8457	81.4418	65.3645	72.6192	80.0849	85.5968	85.3898	75.2955	80.8224	86.3117	85.7606	84.468	84.3765	70.7748	83.4628	82.2969	81.3177	77.14	84.1555	93.1479	89.0649	85.7793	85.6939	85.5621	81.6284	81.7562	113.843	144.719	149.18	174.418	171.566	130.558	114.541	86.4074	85.6966	85.304	85.5699
1139	5	10	0.6	844.572	844.801	844.425	842.668	840.417	836.931	829.548	822.57	819.948	844.9	844.9	844.9	844.9	844.9	844.9	844.9	844.899	844.824	843.878	841.909	840.867	843.388	844.9	844.9	844.9	844.9	844.9	844.9	844.9	844.9	844.9	844.9	844.9	844.9	844.9	844.9	844.9	844.9	844.9	844.9	844.899	844.709	842.85	839.036	835.117	838.49
1862	4	2	0.2	804.924	826.5	826.5	826.5	826.5	826.5	821.214	791.447	742.425	695.779	684.535	708.596	705.314	794.242	826.5	826.5	813.028	819.322	793.773	733.323	665.626	576.322	199.742	0	38.6872	41.5716	51.3949	45.3721	69.8855	42.6187	1.31093	0	0	0	0.140607	39.3053	46.8932	47.0318	40.3231	50.6102	60.9741	47.5754	16.5333	0	0	0
629	3	0.3	0.1	264.875	200.845	280.223	295.184	243.415	248.202	314.635	277.542	326.756	234.182	292.158	282.455	263.007	301.81	278.89	267.064	286.273	300.506	296.422	259.481	280.277	282.95	280.022	291.504	305.234	302.193	267.387	287.491	295.503	301.053	290.91	248.878	262.926	398.192	198.715	275.117	338.749	299.984	270.93	297.607	288.668	470.594	174.451	275.832	331.925	358.76
1000	2	1.5	0.2	305.258	317.775	354.132	382.563	386.887	377.365	361.968	343.334	324.342	304.498	286.411	293.266	292.571	295.438	313.531	309.527	329.431	410.295	454.014	450.555	438.665	424.289	434.104	454.125	475.966	539.925	556.921	553.372	542.331	544.818	539.526	522.128	508.45	492.379	472.594	551.443	557.04	547.134	538.383	539.457	559.084	555.09	541.211	521.435	501.061	507.121
7306	0.1	0.1	0.1	182.639	361.307	712.182	716.115	162.336	156.632	146.533	149.003	157.602	149.839	156.454	158.731	154.332	88.8462	151.457	127.643	174.397	138.425	204.727	258.015	193.796	83.0204	64.9059	114.736	246.742	783.816	589.808	153.14	152.522	147.231	154.958	156.615	157.947	151.133	170.461	134.994	343.33	416.834	281.618	310.573	182.714	172.43	142.899	158.786	163.704	177.104
991	8	0.4	2	602.121	645.629	746.532	772.2	772.2	771.619	760.126	738.22	711.462	681.946	651.33	617.73	589.004	556.478	126.261	19.4403	0.41443	3.55183	4.94071	0.0872829	0.0547989	0	42.6074	20.4667	36.0383	41.5073	54.497	68.7153	61.4771	48.4515	69.9705	63.8541	50.0889	30.4651	5.91021	0	0	0	0.569311	57.1593	67.8035	66.8035	66.9849	64.6081	48.932	24.8206
7317	3	3	0.3	606.99	701.459	750	749.967	748.519	743.376	726.501	701.061	673.116	644.28	614.618	585.342	554.726	578.733	609.415	618.192	611.155	596.134	574.136	547.854	488.425	334.929	289.087	286.019	323.938	403.279	378.625	313.027	296.984	296.735	296.171	295.962	293.141	290.514	280.944	299.605	318.976	300.964	295.76	299.846	316.299	319.474	297.013	296.756	297.798	297.588
998	1	1	0.7	471.908	481.897	496.24	437.045	489.011	499.078	517.19	486.042	493.53	493.445	494.345	493.97	495.233	490.948	491.336	498.765	489.071	446.821	340.374	96.617	0.0516701	1.27595	19.3718	37.7802	49.8683	59.4028	68.8076	70.9811	70.7804	63.6354	67.5516	69.3388	69.8166	70.022	70.2229	69.9878	70.4285	69.3171	67.8318	69.5399	71.0059	69.5928	69.6386	68.943	70.3288	69.8794
1716	7	1.5	0.3	237.031	265.011	291.692	296.005	294.483	295.914	294.622	297.16	297.196	295.952	291.008	273.705	278.524	263.777	295.943	294.081	274.779	297.445	295.427	295.707	295.23	294.975	295.808	282.189	279.075	337.885	350.861	293.872	289.357	287.851	295.689	295.433	294.211	296.562	295.296	321.163	359.39	292.739	265.454	293.538	392.204	339.528	295.064	295.409	295.282	291.244
1896	4	0.3	1	459.655	459.793	438.311	481.127	467.185	470.289	471.369	472.345	471.153	425.651	471.632	477.256	467.526	210.007	97.0286	65.5661	65.6282	66.0354	65.6405	65.4182	66.0376	65.0346	66.7114	63.2878	62.8126	146.286	184.957	73.826	67.9515	65.1359	65.6165	66.4063	66.3716	65.0563	65.8401	59.6953	118.053	66.2813	69.1446	105.153	73.74	66.7133	65.8426	66.2212	63.3041	66.4357
1883	0.4	1	8	476.504	493.924	471.097	495.277	488.195	466.682	477.097	471.535	458.889	451.729	442.328	440.686	445.67	392.898	449.012	480.812	483.455	476.404	459.822	444.789	424.4	402.352	383.502	363.872	404.485	393.629	439.37	451.63	402.753	427.112	430.838	429.937	418.651	406.741	394.148	398.824	419.412	440.917	467.056	468.256	494.915	497.258	506.364	502.152	496.129	483.529
1285	0.6	0.7	3	476.41	478.295	480.771	480.847	483.855	483.863	483.652	484.094	483.707	483.743	483.75	476.956	480.482	481.806	483.284	482.958	483.734	510.853	517.831	487.73	483.659	483.676	482.095	483.625	483.622	483.628	483.642	483.48	483.125	483.848	483.69	483.613	483.95	484.129	483.279	483.63	479.309	481.944	484.362	483.906	480.939	480.243	483.298	483.855	483.659	483.759
1266	0.4	2	0.3	606.044	612.961	618.979	622.549	629.288	634.972	631.511	626.165	620.227	615.086	609.559	604.135	596.892	590.058	582.591	573.941	567.163	561.813	555.517	548.139	544.335	540.396	536.733	532.288	527.97	524.311	520.817	518.254	518.243	517.475	514.305	508.855	502.286	496.423	492.201	503.661	515.302	552.455	607.251	630.425	646.522	669.352	668.84	666.654	663.738	659.33
1176	1.5	0.2	0.1	679.938	660.703	639.869	617.587	588.078	568.712	565.955	572.754	583.555	686.056	685.023	686.1	685.813	684.882	686.092	685.694	685.561	685.815	686.1	685.708	681.825	680.619	685.144	678.086	667.186	661.793	659.372	650.607	663.601	686.1	686.1	686.1	686.1	685.455	680.193	671.448	661.833	685.688	686.095	685.146	680.025	682.832	686.1	686.1	684.141	679.805
924	10	1	0.4	678.301	672.857	677.864	680.432	674.465	677.25	671.562	659.326	659.174	652.312	650.405	668.999	680.873	680.492	680.809	680.505	679.488	676.062	679.958	680.214	675.262	666.03	659.295	657.283	651.756	658.515	680.9	680.9	680.899	680.9	680.899	680.889	680.861	680.73	680.9	680.9	680.9	680.9	680.9	680.9	680.86	679.179	670.814	655.528	642.937	632.16
758	8	0.4	0.1	320.298	342.163	360.938	368.405	355.098	337.607	317.708	305.852	309.651	306.363	307.307	308.36	306.593	305.117	300.21	299.752	293.459	289.947	273.365	236.943	210.304	205.586	186.864	171.714	163.073	154.041	147.349	147.627	140.39	133.223	144.005	149.29	147.527	170.236	187.317	195.967	207.875	214.033	218.294	215.978	203.298	198.15	200.609	184.799	175.291	178.611
1257	0.1	10	0.1	0	0	0	0	0	0	0	0	0	0	0	0	0	0	0	0	0	0	0	0	0	0	0	0	0	0	0	0	0	0	0	0	0	0	0	0	0	0	0	0	0	0	0	0	0	0
895	0.3	0.3	0.1	50.2216	152.097	328.243	485.731	498.547	464.702	429.335	347.241	219.874	52.8227	0	0	0	0	0	0	0	0	0	20.6224	25.6131	28.4596	26.3398	26.9566	25.2718	18.2309	19.9755	0	0	13.9631	6.20767	0.0379276	10.5072	19.4368	33.9465	40.6026	39.6044	46.6849	63.6872	274.025	549.076	541.386	436.181	379.449	364.164	345.525
1317	0.3	6	0.2	653.776	648.905	637.115	624.569	622.388	652.443	639.111	647.166	654.995	655	654.996	655	654.87	653.314	649.371	640.154	641.362	654.115	655	654.717	654.798	654.661	655	654.969	654.106	654.017	654.434	652.064	650.578	642.808	629.582	617.449	605.673	597.543	595.389	591.881	587.31	582.819	576.227	565.824	551.702	538.488	529.915	519.682	508.709	503.912
1242	1.5	10	0.5	639.892	638.003	634.088	626.727	613.521	589.777	548.669	500.688	495.271	640.1	640.1	640.1	640.1	640.1	640.1	640.1	639.057	623.296	592.825	571.395	587.673	604.336	607.568	610.666	613.126	617.278	615.47	608.956	596.74	565.354	509.472	455.297	418.473	401.772	391.8	385.744	470.925	608.493	640.1	640.073	632.604	608.917	555.392	493.819	454.728	437.153
107	5	0.3	0.7	128.648	179.177	196.59	210.107	184.186	137.806	82.7344	60.4606	60.5614	60.4426	59.3745	54.4613	59.8639	72.4794	99.8981	94.9058	68.697	60.5895	60.4826	60.4801	61.0001	60.9324	55.6758	182.467	358.902	406.72	421.464	409.43	378.852	317.002	249.304	180.14	117.506	67.8786	59.4844	93.0807	176.875	293.188	403.703	395.757	367.669	315.274	249.54	181.662	119.505	68.6365
1841	3	0.1	0.2	247.903	253.319	416.784	583.2	583.193	580.615	564.435	538.308	507.604	475.45	440.956	395.138	272.976	200.983	220.057	207.632	173.827	111.475	70.9389	57.0038	56.3706	56.0076	55.1956	48.4637	109.353	305.212	366.182	307.235	232.584	180.731	125.29	70.2735	57.0866	57.227	52.8101	113.033	193.459	211.514	220.804	225.63	222.732	211.335	173.848	122.837	71.8894	57.0252
907	1	0.9	2	567.39	568.9	568.9	568.9	568.9	568.9	568.801	561.988	556.737	565.247	567.333	561.432	548.358	531.906	539.744	551.742	566.602	559.742	544.414	529.223	518.54	507.661	499.508	495.202	485.32	484.968	559.286	568.9	568.9	568.9	568.9	568.9	568.9	568.9	568.9	568.9	568.9	568.9	568.9	568.9	568.9	568.9	568.9	568.9	568.9	568.9
80	3	0.2	0.7	544.026	508.96	513.908	500.314	412.21	378.987	376.246	363.344	346.897	335.4	372.572	432.147	468.968	413.448	420.829	399.81	385.44	387.603	387.332	376.453	360.068	372.679	382.573	523.561	520.76	546.701	551.514	546.353	479.562	386.993	387.438	382.727	376.857	377.977	385.216	473.897	543.502	551.822	551.617	528.567	426.037	384.198	386.337	388.727	386.122	375.16
1236	0.2	0.1	2	102.179	102.757	103.125	103.038	102.523	96.8996	82.9343	68.2422	61.3129	60.264	59.6709	60.1967	63.8237	67.6192	72.6522	80.1702	86.0426	89.1062	85.311	77.5825	74.5854	92.1354	113.742	123.927	132.911	141.443	150.868	160.453	169.072	178.508	188.634	189.144	190.565	194.708	199.163	202.798	205.769	208.901	213.187	218.101	222.313	222.945	217.719	210.49	206.679	206.367
981	5	7	0.2	363.377	363.207	358.433	363.043	365.067	363.958	363.694	363.648	363.183	363.122	364.271	363.673	362.798	364.108	363.137	363.675	362.521	365.064	366.608	367.845	369.367	369.643	370.079	371.477	354.562	345.802	361.349	359.017	366.902	362.936	361.387	364.895	363.326	362.411	362.991	363.714	363.568	363.458	360.19	360.822	365.499	362.564	362.3	363.035	363.428	364.181
1093	0.6	3	1.5	372.624	373.639	382.216	392.786	402.208	410.97	410.195	400.72	387.498	376.108	303.666	94.9587	49.6218	32.5083	48.1193	49.0738	34.3247	45.8384	50.0219	49.6457	49.8259	48.8456	48.8474	49.8011	45.4593	31.3701	46.679	49.697	41.8049	47.644	49.7633	49.4342	49.392	48.1616	47.6201	22.8081	50.6233	45.1432	42.5266	44.822	32.7676	50.2062	49.3576	50.1443	50.4092	46.6475
1709	0.4	4	0.6	315.066	294.262	312.177	331.7	348.268	347.796	341.143	339.951	317.908	314.925	308.333	304.225	302.456	318.895	326.769	329.775	309.907	266.673	275.681	291.389	295.886	297.006	300.544	314.399	321.051	325.435	322.384	337.052	336.594	340.071	318.746	333.094	337.665	334.072	330.067	332.967	305.426	321.139	315.522	309.962	313.365	346.884	334.736	298.565	299.071	294.212
1017	4	1	2	32.0709	38.0374	69.6015	92.0287	76.3264	51.7327	50.0213	49.5664	49.3828	48.6885	47.1317	45.0016	42.6069	44.7974	45.1382	46.3701	46.0616	54.6459	51.2089	50.1597	50.1241	49.9638	49.2874	43.335	43.7424	135.871	200.512	194.517	172.655	135.504	94.9611	55.3466	49.3893	48.5168	47.1071	203.08	284.569	172.658	157.807	177.464	197.939	188.768	153.987	112.551	71.635	50.1252
1194	8	0.4	3	26.6574	19.5871	16.8645	14.3847	10.393	4.58882	0.114171	0	0.00260894	0	0	0.00192826	0	0	0.000561449	0.000805665	0.00114407	0.000779802	0	0	0	16.3947	48.9515	47.5438	46.7194	34.0138	43.1434	48.457	25.1821	36.7447	48.0904	47.3369	48.0687	45.7128	40.7216	33.9507	25.5277	17.1147	8.95615	1.81105	0.00312953	0	0	0	0	0
[truncated: 434 more columns]

## Sheet: Outflow(WG inflow-With Demand)
grand_id	p1	p2	p3	1980-01	1980-02	1980-03	1980-04	1980-05	1980-06	1980-07	1980-08	1980-09	1980-10	1980-11	1980-12	1981-01	1981-02	1981-03	1981-04	1981-05	1981-06	1981-07	1981-08	1981-09	1981-10	1981-11	1981-12	1982-01	1982-02	1982-03	1982-04	1982-05	1982-06	1982-07	1982-08	1982-09	1982-10	1982-11	1982-12	1983-01	1983-02	1983-03	1983-04	1983-05	1983-06	1983-07	1983-08	1983-09	1983-10
610	0.4	0.5	0.1	1420.38	4583.12	3663.81	2124	3935.16	4905.39	2052.37	1500.26	1484.12	1556.25	1510.86	1555.91	1541.14	1378.83	1864.78	1614.59	1428.37	1316.6	1186.8	1119.24	1101.78	1136.93	1096.67	1130.92	1154.19	1165.2	1135.79	1055.27	1170.26	1161.85	1159.07	1124.99	1082.79	1117.62	1078.29	1236.51	1102.68	1068.89	1220.27	1677.29	1155.93	1148.79	1259.08	1189.89	1091.74	1322.77
1294	1.5	1.5	0.1	71.4391	92.8602	732.018	561.291	113.888	49.0141	67.4393	32.5363	175.874	73.4897	105.138	64.0038	76.8972	62.8711	118.7	126.723	201.87	535.217	209.767	181.971	160.035	196.774	193.946	161.721	165.96	145.901	159.494	73.6487	107.977	82.7903	75.4036	74.6988	72.1434	75.663	74.6205	84.8985	84.0236	174.587	191.034	100.11	105.979	86.3753	90.4672	72.5749	70.5086	74.6324
1247	0.5	10	0.5	105.643	95.7122	84.1441	88.3712	117.105	99.7597	153.249	164.283	317.847	147.3	226.598	176.315	146.56	144.585	212.798	153.68	146.339	161.06	166.113	154.127	146.11	1730.69	222.686	153.455	169.263	156.672	174.985	123.153	487.274	353.668	188.711	145.104	107.157	110.9	89.5895	103.781	104.122	137.771	140.557	123.554	107.967	102.503	80.9377	70.2348	68.6321	72.5163
1186	1	1.5	3	206.813	176.271	162.487	140.538	125.521	53.7337	57.6781	57.1964	56.5433	63.4124	60.4124	61.7083	59.0113	54.5699	63.3524	56.3471	79.3717	68.6478	50.3413	53.8877	53.1227	59.1312	61.1231	55.2124	60.0997	66.5431	47.7385	52.1769	55.8036	50.4481	49.1634	49.7835	47.7416	54.3488	28.16	91.889	36.626	84.3305	56.6086	43.8983	62.5628	56.3567	55.6354	54.7389	53.7182	58.4576
355	10	0.1	0.3	156.143	134.955	195.736	416.57	302.374	210.847	214.941	274.986	40.0323	48.0739	170.806	207.672	151.974	173.666	260.029	331.586	421.777	225.045	288.959	302.589	217.455	23.3475	49.8694	166.726	139.324	159.905	207.016	316.278	322.033	240.606	180.011	220.384	22.6364	42.6414	207.857	251.915	263.441	288.788	263.778	420.366	539.172	586.283	508.48	396.939	479.748	326.293
1302	10	3	0.3	19.9119	17.1657	19.5613	16.2922	23.3724	10.4253	19.3541	46.283	26.9395	19.5125	24.5366	16.3566	21.2228	16.5125	63.3384	43.9311	32.8402	240.82	44.4587	25.5402	18.7489	29.3691	18.3347	23.6954	19.8273	19.2708	17.7764	17.43	24.6884	12.4657	27.532	21.0227	19.6434	19.6119	19.9218	21.5246	21.9452	22.7051	22.2954	12.0018	20.4701	18.4418	20.5206	20.1133	19.1894	19.7254
1231	0.6	3	0.3	88.6115	93.7448	62.4553	52.9472	47.0139	41.3419	41.8076	40.14	39.1078	42.2314	40.7533	41.7359	40.5358	36.5883	41.4079	39.2978	55.5862	53.4078	35.5545	38.7615	39.6076	49.265	48.5227	39.8279	43.1911	42.8442	42.6533	42.5935	46.3651	41.444	42.066	40.4001	39.1075	42.2747	47.1008	171.436	72.075	163.423	91.83	65.0737	54.6641	46.5959	41.8657	41.3527	39.7841	41.7835
1140	6	1	0.8	5.59859	3.62093	1.49187	8.24362	5.77447	2.65703	2.90042	2.47815	4.08486	1.91876	7.53321	3.71138	3.70359	2.28811	4.76415	2.73562	5.02086	3.81414	2.87267	2.38493	1.42945	7.56744	1.35291	3.07088	7.64686	4.15822	1.33333	53.2653	44.9333	17.4662	5.31749	11.1003	6.01534	5.62771	27.5466	36.576	37.4597	13.2314	10.0927	7.29113	14.1825	15.3605	13.5612	10.452	4.72564	47.1148
1296	10	0.5	2	38.1989	13.9382	19.1736	18.2973	23.4034	15.9074	18.2055	19.14	18.3163	18.6401	18.0935	19.8473	21.0235	21.6945	18.1162	16.9529	18.1102	31.5973	13.7785	17.1536	16.9865	31.9278	17.5762	14.4712	18.5508	17.0097	30.3375	31.9431	37.7763	21.9479	26.5325	27.4755	27.0825	27.5163	31.9396	37.929	34.4432	31.6882	31.2343	18.4526	39.275	17.729	26.4485	26.9082	26.0854	27.2812
1277	0.7	6	2	1.69688	1.65169	1.49597	1.46494	33.5024	1.00899	1.53892	1.52035	1.83728	1.19034	2.44474	1.78007	1.63727	1.48316	25.2698	4.4928	6.30174	45.0485	3.27497	3.06414	3.12705	2.92306	3.20069	1.40794	1.73893	8.05555	1.48763	1.64538	11.0145	1.18592	1.46379	1.46392	1.39534	1.4359	1.5222	2.35421	15.8305	1.5747	18.6335	4.31957	7.03791	2.81837	1.48332	1.47963	1.39908	1.44981
1280	0.7	0.1	0.4	11.4531	14.8637	15.7994	14.6165	20.1824	12.9802	14.7349	16.161	215.925	224.729	78.635	148.843	124.271	82.2071	150.791	74.7458	49.5991	30.9085	16.5422	16.7545	15.4827	96.5968	36.7209	30.7133	29.2417	32.9518	23.7528	16.6633	26.7324	19.5716	18.8226	16.0592	15.5123	15.9677	15.4345	15.924	16.7747	15.6168	16.4114	14.5433	15.8362	16.0213	15.8954	15.0366	14.889	15.8679
182	0.3	0.8	0.1	216.163	543.853	216.613	137.349	115.741	109.223	114.977	92.6084	78.0349	79.5023	74.7292	78.8454	89.4048	102.42	92.646	62.1043	72.725	68.8648	70.6282	21.657	16.3254	17.9925	128.368	112.218	194.02	474.761	408.012	488.086	159.927	120.691	103.482	116.527	110.452	102.002	184.614	333.211	399.102	511.25	695.356	290.288	149.177	121.165	108.997	119.131	108.762	97.4585
1152	0.1	4	0.7	0	0	0	0	0	0	0	0	0	0	0	0	0	0	0	0	0	0	0	0	0	0	0	0	0	0	0	0	0	0	0	0	0	0	0	0	0	0	0	0	0	0	0	0	0	0
1295	7	0.2	0.1	43.6235	21.8113	26.6378	22.2623	28.4927	22.7727	25.1445	24.157	24.278	25.1249	29.2403	25.8253	32.2818	22.2298	21.6244	43.1822	103.41	115.563	59.8612	65.9201	64.5241	34.1409	82.4535	34.6463	41.2517	29.3585	33.8511	80.8328	62.2435	48.9493	30.0128	16.9899	11.9718	21.0799	116.255	66.4558	57.8362	92.2698	84.4064	48.2594	118.516	49.4765	75.2896	73.1391	52.8347	16.4502
629	2	0.1	0.5	2413.92	4522.75	3409.91	2150.29	3180.6	4701.61	2398.35	1525.36	1969.16	1519.2	1985.25	1502.74	2047.57	1506.09	1637.82	1800.8	1270.53	1684.71	1589.87	2004.93	1500.66	1480.56	1536.21	1536.53	1550.08	1508.03	1627.69	1732.38	1301.25	1656.4	1523.06	1551.72	1036.96	1507.35	1089.71	1562.28	1466.33	1144.27	1668.81	1248.47	1335.79	1286.61	1105.76	1607.58	1503.32	1523.36
1266	0.4	2	0.3	15.157	11.1407	10.6075	10.6737	12.7935	9.64305	11.0614	10.8304	10.2219	10.5604	10.2096	10.5455	10.5425	9.88109	11.8109	10.7652	10.978	11.8317	11.2764	10.4071	9.89695	10.3546	10.5531	10.6189	10.5383	9.90424	10.7256	10.5501	11.803	9.64974	10.0712	9.84452	9.38288	9.70327	9.5766	14.4888	10.3996	13.7872	10.056	8.85327	25.3051	11.8615	11.1961	11.3004	10.7094	10.9555
1176	1	0.1	0.1	10.5438	13.9285	8.18713	14.3497	22.7149	13.1936	13.1247	10.4517	244.216	6.31411	289.688	8.45072	10.6139	11.3291	87.8997	11.822	11.7323	13.5975	34.2738	11.1183	10.6702	149.849	7.41614	11.3159	13.6941	11.4968	10.8195	10.2941	81.6672	144.865	69.235	49.3365	27.9726	10.8076	11.0631	12.1217	78.5851	44.8131	28.3659	10.948	37.795	13.8572	33.6854	31.8408	9.68133	171.42
758	10	10	0.5	103.191	84.8202	93.0677	87.483	87.0438	77.8713	83.921	83.6635	81.1066	77.2425	65.1365	65.1828	62.4296	59.247	64.3283	71.7076	66.7647	59.5404	63.3405	48.6164	51.5316	73.6779	46.6622	54.087	58.8281	47.0727	60.0932	57.9125	70.3556	67.4277	80.1903	75.2934	69.1213	86.367	82.0082	81.8014	82.0674	65.232	75.6012	65.0485	67.0353	66.4933	81.9405	65.8159	62.0954	73.5211
1242	1.5	8	0.5	3.82078	4.98594	5.15721	4.18271	5.71283	6.47906	7.00976	6.1086	205.677	199.534	46.2621	49.8173	48.2243	37.6049	33.845	27.9754	8.45708	5.72878	7.14943	8.88675	7.05623	4.30014	5.05915	5.19972	5.84406	4.24762	5.02512	3.89987	5.43458	6.01969	6.2295	5.82297	5.05377	4.34348	4.53793	9.44577	8.68403	18.674	19.8489	31.2009	3.68999	6.03706	6.48213	5.57046	4.86653	11.2807
1236	0.5	0.5	2	2.72725	2.87227	3.04953	2.88388	3.2954	3.18656	2.87089	2.47551	2.48986	2.75293	2.66904	5.08493	2.75593	2.50627	3.41268	2.75489	2.75514	2.80816	2.76294	2.60089	2.42792	5.52972	2.03632	2.87632	2.88065	2.84311	3.11685	2.88567	7.27533	15.6954	3.39387	3.08478	2.79457	5.3805	5.34274	4.68773	4.87448	5.04562	7.44974	8.03239	6.62477	2.96273	3.00815	2.86765	2.64502	2.7617
1194	0.6	6	0.5	14.3397	13.599	13.4259	12.9635	13.478	13.4171	14.0968	13.6148	12.916	15.527	12.2118	13.7534	12.3258	11.1561	13.4019	12.2344	12.4552	12.3501	12.7263	12.3865	11.5885	29.6976	34.1112	26.5403	22.5141	27.4847	24.7159	19.2318	84.4996	45.3563	25.6214	18.3609	13.9182	13.2661	12.8325	13.4212	13.4662	12.4825	13.7766	13.1552	13.2072	13.0275	13.17	12.813	12.0311	12.3597
[truncated: 434 more columns]

## Sheet: Storage(WG inflow-With Demand)
grand_id	p1	p2	p3	1980-01	1980-02	1980-03	1980-04	1980-05	1980-06	1980-07	1980-08	1980-09	1980-10	1980-11	1980-12	1981-01	1981-02	1981-03	1981-04	1981-05	1981-06	1981-07	1981-08	1981-09	1981-10	1981-11	1981-12	1982-01	1982-02	1982-03	1982-04	1982-05	1982-06	1982-07	1982-08	1982-09	1982-10	1982-11	1982-12	1983-01	1983-02	1983-03	1983-04	1983-05	1983-06	1983-07	1983-08	1983-09	1983-10
610	0.4	0.5	0.1	36181.1	36700	36700	36700	36700	36700	36700	36700	36700	36700	36700	36700	36700	36700	36700	36700	36700	36700	36681.6	36490.5	36238.2	36012.3	35808.5	35618.1	35440	35478.4	35952.8	36361.5	36230.2	35878.3	35498.7	35125.1	34810.1	34535.5	34299.6	34227.9	34470.4	34907.7	35805.8	36676	36676.7	36434.4	36098.9	36141.3	36424.4	36670.6
1294	1.5	1.5	0.1	1696.13	1635.24	1319.92	512.794	341.961	321.591	286.828	256.772	159.526	106.985	91.6307	105.262	131.825	156.092	236.573	373.616	383.884	352.349	387.288	383.794	383.175	381.095	381.824	383.751	383.222	382.228	384.457	388.709	384.631	385.293	388.075	383.673	374.829	362.266	347.306	333.97	336.287	356.812	373.444	388.738	387.049	388.331	379.884	376.471	364.582	346.64
1247	0.5	10	0.5	1995.87	1952.41	1922.66	1880.48	1838.68	1808.49	1696.15	1550.32	1397.89	1493.94	1465.36	1540.16	1574.3	1510.46	1462.91	1440.09	1383.72	1314.63	1231.44	1150.2	1076.02	471.187	268.613	246.265	245.473	245.662	245.857	247.729	223.521	246.659	250.066	246.943	246.108	247.56	246.684	245.564	242.242	239.746	246.635	247.398	246.33	245.079	247.425	248.902	239.331	224.361
1186	1	1.5	3	1742.99	1791.24	1736	1719	1714.58	1706.11	1680.92	1640.06	1592.86	1548.45	1505.76	1465.03	1422.73	1382.58	1342.5	1304.01	1272.69	1331.73	1347.61	1324.46	1296.67	1267.97	1243.81	1222.86	1199.92	1206.19	1224.44	1217	1201.38	1178.27	1146.35	1105.42	1058.91	1014.28	985.436	1170.8	1283.17	1382.86	1533.59	1594.28	1586.93	1569.02	1540.15	1497.22	1447.78	1397.47
355	10	0.1	0.3	172.052	171.456	170.81	208.49	560.525	803.134	641.798	335.822	166.313	152.006	166.294	171.538	172.361	171.092	169.646	231.194	635.617	1100.61	912.428	558.29	264.217	170.578	163.264	169.752	171.846	170.9	171.221	196.409	396.349	618.445	542.556	271.989	164.589	156.317	167.658	171.962	180.575	194.008	258.586	436.452	1197.65	1733.88	1416.51	1001.92	607.467	384.596
1302	10	3	0.3	961.584	959.007	954.97	950.301	942.721	935.297	923.068	890.785	875.316	886.27	895.929	918.857	935.524	954.096	967.351	970.8	970.653	982.505	974.305	970.311	971.013	971.289	971.51	970.813	969.287	966.862	964.993	960.641	953.747	947.183	932.314	916.921	905.94	897.791	891.684	886.699	885.676	894.968	919.02	945.27	943.57	938.511	931.056	922.727	914.834	908.463
1231	0.6	3	0.3	1257.94	1289	1289	1289	1288.88	1281.2	1259.67	1232.36	1203.45	1173.7	1143.98	1115.45	1086.94	1059.97	1033.21	1005.59	982.458	1142.79	1222.16	1223.96	1212.65	1199.67	1216.22	1244.25	1254.73	1268.11	1284.69	1288.85	1288.07	1286.13	1276.92	1257.9	1233.02	1205.53	1179.2	1281.15	1289	1289	1289	1289	1289	1288.97	1286.13	1273.47	1254.2	1230.61
1140	6	1	0.8	1011.13	1005.7	1002.8	995.646	989.395	985.267	981.16	977.373	973.957	970.795	967.321	962.778	959.887	956.425	952.731	949.623	944.466	940.214	935.639	932.087	929.237	924.613	919.486	916.876	912.092	904.057	901.83	863.415	824.457	803.21	794.892	785.569	775.329	769.038	760.631	715.291	686.222	675.701	671.622	662.534	652.35	635.593	620.541	607.632	598.536	623.514
1296	10	0.5	2	675.096	686.913	687.654	682.305	675.879	670.199	657.346	641.508	625.875	611.901	597.646	582.737	566.915	550.979	540.661	529.456	517.592	529.928	540.538	530.105	519.307	507.085	516.753	523.312	517.453	510.365	497.119	477.972	470.248	467.9	449.91	427.584	404.359	382.685	360.675	351.651	351.036	363.685	393.015	416.613	424.408	441.722	428.923	410.413	391.312	370.544
1277	0.7	6	2	495.7	497.563	498.636	499.588	491.243	485.722	482.91	478.689	476.18	476.013	475.594	483.071	488.555	495.632	497.867	498.282	499.411	497.499	499.759	499.66	499.057	499.366	499.863	498.684	498.624	498.674	494.61	496.419	496.354	497.528	497.6	496.105	494.792	493.803	493.308	493.706	495.899	491.714	496.068	499.202	499.097	499.482	498.622	497.693	496.386	495.808
1280	0.7	0.1	0.4	1203.91	1188.41	1168.12	1144.64	1120.21	1094.58	1044.58	990.597	1128.12	1211.3	1211.3	1211.3	1211.3	1211.3	1211.3	1211.3	1211.3	1211.28	1204.21	1187.79	1182.45	1197.3	1211.3	1211.3	1211.3	1211.3	1211.3	1210.68	1210.52	1207.83	1207.58	1191.55	1176.32	1165.68	1158.53	1153.53	1148.91	1156.74	1168.14	1175.87	1167.46	1154.92	1130.97	1100.72	1071.31	1048.83
182	0.3	0.8	0.1	820.019	1070.02	1101.11	1096.26	1065.48	977.371	861.632	763.93	699.03	638.575	579.191	522.659	466.614	459.984	535.005	644.705	641.109	575.818	488.219	438.426	433.927	432.767	463.331	714.182	1092.43	1100.69	1102.31	1102.67	1102.03	1077.92	1021.79	932.255	849.307	777.272	777.516	1040.61	1098.19	1102.01	1102.44	1102.42	1102.29	1085.47	1014.01	921.569	842.849	773.278
1152	0.1	4	0.7	0	0	0	0	0	0	0	0	0	0	0	0	0	0	0	0	0	0	0	0	0	0	0	0	0	0	0	0	0	0	0	0	0	0	0	0	0	0	0	0	0	0	0	0	0	0
1295	7	0.2	0.1	386.312	434.486	457.02	468.639	472.745	471.205	455.44	435.903	416.268	400.524	383.285	367.013	356.798	359.198	359.618	347.161	279.804	222.589	200.461	156.292	107.149	85.0779	79.1858	86.8648	84.9213	85.2068	84.3005	84.8778	101.776	106.027	86.6963	86.0386	85.7985	83.4116	78.3131	132.575	180.277	208.744	250.521	260.911	235.843	232.435	189.957	140.61	96.0863	85.8958
629	2	0.1	0.5	285.601	263.358	312.939	298.137	289.237	256.081	360.368	350.602	320.931	328.366	328.732	322.687	341.258	309.339	302.539	321.861	332.288	292.341	346.849	343.861	329.078	319.935	333.076	330.934	344.939	330.674	312.176	304.398	339.538	299.241	332.644	332.609	354.24	335.993	361.319	344.801	333.738	346.442	328.113	346.418	367.876	357.681	347.119	303.888	327.835	365.61
1266	0.4	2	0.3	630.098	637.383	643.77	647.716	654.81	660.742	657.419	652.252	646.6	641.818	636.653	631.586	624.678	618.14	610.956	602.573	596.026	590.874	584.726	577.458	573.822	570.114	566.687	562.477	558.365	554.871	551.534	549.12	549.228	548.503	545.323	539.869	533.344	527.587	523.496	535.096	546.887	584.189	639.179	662.574	675.182	688.046	686.988	685.083	682.494	678.445
1176	1	0.1	0.1	391.916	380.019	368.992	356.734	341.091	335.61	343.861	360.684	372.463	430.93	374.95	419.538	460.768	469.549	431.225	440.067	451.818	463.177	469.449	471.679	477.057	446.092	388.869	391.733	391.153	397.108	404.311	404.895	428.752	467.593	472.68	470.468	470.493	474.074	477.828	478.149	461.902	468.499	471.34	474.112	470.745	467.965	470.276	468.373	476.427	450.394
758	10	10	0.5	190.863	184.981	180.371	168.898	144.422	122.389	101.098	87.3147	83.4902	69.0823	66.4738	66.2986	66.3881	66.4407	66.5187	67.8861	68.2619	75.6335	68.8347	68.1748	67.2234	68.5202	66.5562	66.6372	66.6206	66.4572	66.7532	68.4814	68.704	66.4361	75.8364	70.8367	68.7369	77.4803	77.9496	71.0009	68.7315	66.5259	66.9967	66.3594	67.2174	72.7597	76.2447	67.0846	67.2397	66.765
1242	1.5	8	0.5	639.996	638.506	635.024	628.107	615.118	590.755	547.871	498.436	492.488	640.1	640.1	640.1	640.1	640.1	640.1	640.1	639.042	622.672	590.621	567.895	583.698	600.4	604.021	607.564	610.476	615.057	613.677	607.603	595.599	562.891	505.734	450.45	412.932	396.211	386.568	380.831	466.349	605.4	640.1	640.079	632.557	608.215	553.022	490.025	450.142	432.523
1236	0.5	0.5	2	195.672	194.504	193.118	191.243	188.889	181.143	165.153	148.642	140.09	137.413	135.288	133.601	135.162	137.457	140.813	146.525	150.735	152.078	146.506	137.068	132.525	147.555	167.523	176.281	183.728	190.701	198.517	206.464	212.293	212.85	212.953	211.538	211.379	213.03	213.143	213.121	213.083	213.061	213.014	213.05	213.098	211.889	206.603	198.582	193.417	191.808
1194	0.6	6	0.5	495.929	494.272	495.612	495.566	493.647	488.107	477.637	465.047	453.415	445.945	442.625	440.284	439.168	436.691	433.711	431.486	429.092	425.491	418.568	409.282	401.01	445.942	505.7	505.7	505.7	505.7	505.7	505.7	505.7	505.7	505.7	505.7	505.664	505.313	503.727	500.704	496.338	491.771	487.549	483.715	479.646	474.559	466.999	458.01	449.021	440.39
[truncated: 434 more columns]

## Sheet: Outflow(OBS inflow-No Demand)
grand_id	p1	p2	p3	1980-01	1980-02	1980-03	1980-04	1980-05	1980-06	1980-07	1980-08	1980-09	1980-10	1980-11	1980-12	1981-01	1981-02	1981-03	1981-04	1981-05	1981-06	1981-07	1981-08	1981-09	1981-10	1981-11	1981-12	1982-01	1982-02	1982-03	1982-04	1982-05	1982-06	1982-07	1982-08	1982-09	1982-10	1982-11	1982-12	1983-01	1983-02	1983-03	1983-04	1983-05	1983-06	1983-07	1983-08	1983-09	1983-10
753	0.6	0.5	0.1	1498.45	1464.82	1579.15	1377.58	1635.21	1629.41	1338.06	1439.12	1538.66	1545.99	1357.18	1493.77	1620.45	1408.48	1443.55	1286.48	1945.85	1736.41	1275.74	1506.73	1505.17	1593.1	1535.76	1418.28	1605.72	1569.13	1664.58	1954.33	2139.58	3682.19	3694.51	1802.28	1464.54	1736.21	1361.72	1614.88	1592.58	1595.78	1772.18	1339.55	1715.22	2032.93	2640.44	1375.69	1380.74	1678.33
870	0.6	0.5	0.1	2246.11	2101.71	2111	1788.74	1976.19	2131.17	2086.09	1955.79	1848.99	2106.79	1895.46	1785.78	2240.83	1830.15	1748.8	1670.83	2068.24	2129.42	2018.72	1725.74	1753.59	1712.82	1971.98	1878.1	2157.5	1881.32	1994.42	1665.33	2557.65	1588.66	2062.07	1955.55	1870.63	2233.05	2251.9	1786.29	1944.26	2202.17	2136.18	1797.2	1915.84	2026.25	1989.54	2232.67	1772.64	1621.19
597	0.3	0.4	0.3	825.355	802.362	723.13	952.465	1644.42	1458.88	1010.88	1362.2	1671.44	1328.65	809.047	785.127	720.564	699.134	728.395	780.844	830.069	816.718	630.339	673.96	815.148	763.908	628.827	676.015	728.356	773.432	700.089	823.33	908.9	776.511	588.299	794.711	804.253	925.353	841.708	822.878	810.896	711.983	1019.14	1228.09	1902.43	1845.21	2730.43	1874.49	1467.82	1680.98
307	0.5	0.3	0.3	798.708	848.764	1011.88	858.49	987.758	1159.46	644.685	783.352	796.159	971.47	807.47	856.687	834.2	805.634	796.975	713.371	1390.18	801.427	579.26	721.242	778.044	855.177	835.982	744.507	888.361	915.614	810.547	686.477	997.677	980.316	649.764	708.885	801.566	856.064	763.635	863.827	816	803.082	775.285	741.826	974.026	726.723	866.712	664.748	688.997	847.509
1753	0.4	7	0.4	7841.96	3567.94	12943.2	6240.78	4937.92	2894.67	1838.44	2966.17	1886.73	1768.92	3606.02	558.591	2939.55	2858.68	1584.23	2814.68	607.988	8024.48	2429	2553	2215.36	2170.89	1839.55	3688.38	9921.2	8480.78	5944.93	3491.16	1954.19	2188.78	2753.56	3371.16	2885.44	2391.56	3923.23	10775.2	5322.22	6349.59	3942.49	8058.52	8452.65	3880.26	3733.54	2448.32	2461.76	1755.94
297	0.4	1	0.6	483.09	277.317	283.389	487.176	960.181	1675.36	852.417	736.604	737.117	742.643	699.405	830.466	635.546	317.095	285.147	507.53	1062.17	1789.97	2231.83	956.405	687.279	755.827	702.427	693.088	677.962	489.091	294.991	384.124	1046.02	1811.39	1564.02	799.067	756.458	758.36	676.483	764.415	726.388	651.889	441.297	574.59	969.751	919.641	1655.12	778.365	704.808	755.93
1036	1	0.3	0.3	120.732	193.576	444.572	331.727	254.613	416.195	306.481	225.11	132.539	80.7556	93.2425	68.6058	92.6824	87.2868	82.2206	79.4119	134.588	135.447	136.811	138.632	65.7471	89.7806	107.984	136.393	402.358	889.485	590.147	243.695	197.577	583.276	261.345	308.32	121.045	133.446	336.888	1202.3	551.815	1044.26	698.678	889.539	793.712	644.548	452.912	369.159	128.57	155.875
989	7	2	0.2	149.502	223.618	398.092	1349.39	201.895	173.901	96.8397	165.536	82.9349	141.202	100.364	167.36	118.852	124.883	107.079	159.328	240.513	2315.79	1043.7	341.595	283.739	404.47	641.197	526.738	823.694	910.676	1098.97	309.257	1480.6	2141.67	477.696	834.389	213.525	108.314	154.403	1523.53	314.161	602.886	786.487	3458.82	2303.97	923.582	250.083	118.888	127.094	183.673
1026	5	0.3	0.1	163.55	191.232	146.658	100.333	128.377	152.522	96.4338	145.667	73.5711	149.789	160.22	108.055	104.919	152.233	138.646	150.277	153.283	151.523	98.1003	143.732	107.772	128.426	111.247	173.422	351.241	390.65	296.9	210.322	216.093	464.761	170.096	263.197	131.42	128.627	204.08	1000.16	197.581	412.949	338.732	705.414	611.151	242.758	331.685	153.426	133.695	171.089
1848	5	1.5	1	648.825	247.476	719.427	259.44	271.088	334.589	286.588	270.063	82.3687	120.558	126.461	58.1118	87.9273	148.592	190.197	176.399	178.497	130.657	105.741	61.57	120.447	35.5823	55.4691	94.2012	340.917	219.155	194.542	383.339	129.8	140.717	91.2792	139.593	65.3085	223.215	199.285	629.891	185.104	407.232	321.648	553.642	504.391	214.361	341.166	360.463	450.607	72.128
1869	2	2	1	205.438	171.139	475.003	328.755	263.317	314.41	255.208	186.746	397.368	42.9708	65.9839	38.034	62.8629	65.1226	102.444	51.5962	76.5459	44.8727	55.1531	53.1027	50.4223	59.8321	44.6961	58.9691	102.097	106.768	93.7508	433.964	176.802	90.6187	51.2312	64.9939	103.004	51.9959	160.412	460.103	221.538	548.191	375.804	605.511	624.28	217.624	366.151	241.43	258.281	269.726
7313	0.7	0.2	0.1	311.369	320.209	299.686	386.892	461.113	697.117	366.365	395.515	465.819	383.772	372.723	365.386	352.027	345.757	313.938	337.35	547.232	1049.27	399.068	369.356	394.777	409.219	347.33	315.736	251.633	316.96	350.286	399.681	481.188	1021.7	821.227	352.258	465.877	410.96	398.155	375.598	416.87	360.267	409.46	407.995	453.46	653.905	696.231	392.061	419.435	451.281
1042	2	0.4	0.1	85.6541	124.146	178.292	189.691	115.732	118.897	39.7541	23.8448	34.5985	47.2442	31.827	41.2029	46.7338	43.4184	95.5182	38.7465	112.437	74.5907	43.5024	49.8106	20.2169	30.5592	40.828	31.9696	140.382	236.92	126.572	99.0827	151.643	143.288	73.6834	63.116	20.8909	48.4067	98.8335	368.174	202.296	245.4	265.261	337.659	244.073	211.916	117.228	42.9126	23.3293	63.9241
884	0.2	0.1	0.1	1865.45	1304.32	1641.03	1539	2140.58	2021.56	2386.64	2751.26	2131.88	1935.48	1913.71	1141.41	1406.04	1374.93	1778.82	2507.98	2237.04	1798.47	2176.17	2324.58	1787.18	1518.11	1101.19	1286.38	1487.31	1074.02	1423.15	1722.2	1703.62	1223.17	1953.6	2348.49	2245.76	1770.68	1918.76	2049.04	2245.21	1582.46	1370.62	747.073	959.161	1581.68	1420.04	2729.58	2047.82	2063.04
1144	0.5	7	0.1	1272.15	1562.66	1183.22	1066.38	1199.6	865.975	563.997	421.618	374.883	1381.98	923.891	1301.56	837.974	840.46	1027.36	750.739	940.011	1934.64	997.596	739.577	623.371	2050.92	1862.36	1273.25	1098.24	2317.77	1518.83	993.41	2341.15	2423.12	2127.57	1097.24	885.654	847.269	848.148	3429.82	986.987	1988.96	1832.47	1349.35	1766.85	1181.84	1126.12	1038.08	970.362	1372.15
1006	1.5	1.5	0.2	19.2781	23.3308	119.598	94.55	42.6508	14.8656	8.50013	19.5553	12.939	21.9242	10.8467	15.9161	14.2589	18.6017	15.4461	15.2323	23.1624	170.065	49.962	40.2001	9.66274	80.3398	57.4986	23.6227	159.276	73.8498	89.6322	60.6543	87.971	116.236	22.2057	97.8054	10.3861	12.6798	64.6501	269.217	57.2463	51.9775	39.7178	329.839	231.939	62.1172	71.7602	12.5848	15.7049	134.923
1048	0.6	5	0.2	182.152	121.467	152.11	1407.77	1154.47	1032.3	118.166	172.29	90.2562	177.813	100.527	154.891	145.064	94.4995	122.569	737.941	305.29	267.42	252.324	151.511	205.522	218.309	669.748	182.306	502.813	114.18	391.874	141.444	2317.34	1878.09	1190.29	231.266	74.8914	92.5429	102.711	105.2	123.237	225.554	626.985	1468.03	1267.4	843.209	615.125	65.3597	117.616	659.793
1032	4	2	0.1	67.7882	69.5278	66.2336	341.598	86.0118	37.4095	37.3201	73.7507	39.7041	77.712	33.3071	60.9773	50.1911	59.4276	45.3288	68.3868	146.455	145.881	95.9031	147.49	127.303	195.57	134.72	81.5168	451.326	488.498	210.851	62.4036	448.339	543.134	233.979	353.001	20.3712	50.6357	61.4442	143.111	131.307	341.388	297.274	763.54	222.576	92.8545	72.584	82.54	345.436	538.418
355	1	0.3	0.3	175.596	181.03	193.346	171.681	222.033	391.241	283.31	188.214	213.763	199.656	194.999	186.777	184.446	173.387	180.156	163.986	264.456	540.591	186.04	174.254	176.373	191.082	168.762	174.846	174.553	178.791	182.915	154.685	202.175	317.532	428.642	213.79	253.178	361.778	270.593	259.986	290.542	264.22	235.594	187.454	325.554	607.347	528.193	312.734	231.288	305.553
1101	0.9	4	0.8	199.325	87.796	291.48	97.0396	58.7563	65.5721	94.3529	58.7141	101.91	68.9328	114.624	46.4744	75.922	96.9455	57.2783	81.9281	90.8655	105.647	55.8542	66.8509	90.1126	116.836	49.1201	103.095	106.109	77.9573	83.7861	84.8714	50.9469	94.232	71.7741	129.788	54.1872	82.3116	70.3955	266.093	472.429	394.204	66.8196	405.493	460.689	47.7276	71.9715	66.6848	72.7115	81.5049
1023	10	7	0.1	71.2271	146.185	315.79	649.335	172.612	100.106	33.4706	66.598	34.9869	47.4781	45.7805	49.1276	50.3466	41.1083	47.0804	42.8402	72.62	88.8728	93.8412	138.975	41.0465	110.281	403.031	106.058	48.7365	251.029	209.099	81.3462	614.917	912.785	291.31	58.5886	40.4971	46.6143	50.1542	52.0861	48.0221	91.8504	374.99	820.601	392.166	410.297	322.507	94.5449	44.6189	58.284
1864	0.7	1.5	1	121.664	66.9436	326.977	197.279	198.522	72.3613	12.9716	14.6147	18.882	42.151	59.4534	27.0199	27.7264	75.4118	82.7885	31.4402	54.6275	20.933	27.5159	16.437	15.4864	34.3675	31.6223	16.5216	115.488	77.2637	41.1797	197.966	34.361	47.3538	15.2837	95.4144	106.094	124.927	102.659	341.101	174.422	254.789	226.78	304.83	301.074	127.471	62.314	26.1862	84.4142	38.939
1021	7	0.3	4	14.6737	9.17849	12.3913	33.6425	54.4496	88.4771	6.48562	13.4459	7.42659	11.4312	5.15828	21.97	11.8709	7.91649	14.1761	8.89107	17.5216	7.53605	10.0346	10.4635	13.8256	12.4153	105.899	13.5837	11.096	30.1434	30.6686	9.72337	190.789	176.798	139.446	7.12097	7.3782	14.0978	13.3883	10.542	10.9808	11.4718	21.4115	91.9646	54.3665	133.012	19.2988	13.0829	13.7335	11.4639
1120	0.4	2	0.3	4.0011	3.0744	3.11271	2.08954	5.21062	1.63531	1.30313	2.63358	6.3404	1.81997	2.51571	2.4383	3.92696	3.99805	2.68171	3.46652	3.54145	3.07485	3.89137	2.33108	2.44245	7.36644	1.44415	1.81674	6.19193	1.98809	3.48107	2.38391	46.7953	72.4436	22.3346	1.63972	3.41447	2.19157	5.56711	3.32524	3.19535	3.44133	12.093	2.98347	48.2025	2.40859	1.39257	4.65663	2.05775	124.658
182	0.3	0.4	0.1	1055.2	858.725	586.856	495.562	470.036	243.107	190.533	160.543	185.942	148.97	178.432	175.02	175	150.101	197.541	164.976	163.109	140.209	168.898	100.412	74.3677	83.4492	230.773	827.456	750.419	1055.81	893.059	1343.67	904.098	442.259	216.319	188.026	173.146	206.543	402.427	752.674	615.318	927.706	1488.43	843.967	983.802	899.68	448.9	219.371	184.933	169.384
7311	0.2	0.4	5	11.7667	11.4054	12.628	24.1798	12.4442	4.77879	5.49735	12.8949	6.72219	12.3493	5.58667	10.352	9.08325	13.1805	9.65785	8.61604	11.358	6.55917	5.23872	10.2088	4.24055	16.5746	8.32744	5.5063	9.14164	10.246	8.42826	4.68038	18.5132	143.929	5.44491	7.70283	5.00439	10.7032	6.86516	17.2884	6.53217	28.2046	61.3453	145.704	57.5894	9.05282	5.6047	5.67596	10.1177	16.5426
1755	1	2	0.7	124.323	165.522	215.547	98.1565	117.806	37.2508	33.967	24.4283	14.7308	15.3005	19.8322	20.7469	45.6711	212.948	114.075	105.753	59.0933	207.422	80.1533	28.3387	24.7765	31.584	60.4815	124.617	222.795	164.649	136.627	194.629	141.628	44.5136	34.0476	55.0393	113.32	17.8968	55.2134	195.482	100.093	151.331	69.3609	226.475	214.12	31.0065	43.9084	61.049	63.8289	304.344
1192	0.5	4	0.3	378.31	449.557	267.883	422.245	397.434	85.7051	36.4942	41.0851	41.873	39.2864	55.2282	71.3214	59.7145	77.6238	97.8063	74.0881	266.651	501.145	107.111	48.7634	45.5469	114.53	81.1946	65.1092	92.4008	175.72	114.87	99.4834	132.078	126.802	83.4973	39.4977	44.0232	63.302	105.648	496.821	180.772	498.15	379.967	194.102	155.412	94.3218	135.799	50.0417	38.5813	41.2865
541	7	0.1	6	92.8206	80.7872	74.7513	105.997	119.324	168.593	160.798	153.883	156.712	124.038	92.603	93.1012	87.0086	83.4689	56.1615	40.6514	68.0338	98.8746	80.885	44.0258	36.5971	37.6474	33.7497	32.3246	32.1686	27.1376	43.6536	83.0086	114.92	124.999	129.837	158.657	143.827	90.3706	87.6657	88.6027	99.1308	81.3667	99.8518	77.5995	122.522	144.623	145.467	158.231	143.732	156.306
1716	0.4	6	0.4	7.61322	176.339	7.13065	4.27782	5.92154	5.61529	6.11979	5.97563	5.84741	6.22617	6.5111	8.22387	6.34491	49.1836	4.99061	6.39089	177.679	3.693	5.58223	5.92329	5.70107	6.00179	5.9501	9.79381	90.7477	90.5825	52.1126	25.0814	6.37741	38.3067	6.12635	5.98196	6.18604	6.40389	6.68703	278.909	5.02996	15.5476	62.3976	194.781	57.8478	67.2508	5.53727	6.18611	5.96081	291.405
1883	0.5	0.6	10	52.7169	36.0572	48.74	47.1874	51.3518	41.7189	47.0239	42.7943	37.1864	47.778	53.8037	43.3809	43.8571	40.5775	45.139	43.0619	45.5955	44.3124	45.1651	44.6818	42.6301	44.3967	42.6989	44.2723	45.9669	41.139	46.1459	45.4011	43.6804	39.289	39.4132	40.1798	37.4785	179.649	73.4798	83.2697	43.6791	164.809	70.4975	44.3728	74.5018	59.3484	43.6791	41.3378	44.7343	38.0074
895	1.5	0.3	0.1	1490.56	1013.77	1578.78	2088.7	2284.01	2145.9	2599.17	2712.77	2536.6	2653.67	2411.93	1205.26	1051.36	909.402	1734.81	2413.97	2447.2	2293.72	2538.47	2375.37	2488.82	2564.59	1384.51	1063.77	1121.53	868.449	1359.47	2053.84	2266.97	1890.31	2300.86	2420.3	2326.17	2612.09	2811.98	2033.68	1823.48	1505.67	1628.71	1244.58	1840.06	1539.88	2069.27	2676.42	2530.85	2651.64
1093	0.4	3	1	16.1277	17.3322	39.0885	63.0553	165.245	49.8982	7.53551	10.142	31.5643	26.8919	10.1793	21.3007	12.5305	24.6686	61.1673	44.4741	169.453	220.111	76.1615	16.1598	10.2471	144.006	56.1794	22.4042	172.559	189.984	102.039	32.3147	291.32	177.113	26.0606	17.0174	6.4263	27.523	26.3348	239.767	55.0447	91.8921	94.9066	131.879	305.205	123.786	54.1144	13.1927	8.19747	21.0871
1709	10	0.5	0.7	172.798	162.212	329.428	276.973	149.919	53.8631	113.327	88.4816	46.2262	63.68	75.6944	51.2363	63.1877	274.289	220.473	299.722	329.551	346.014	66.1446	114.898	66.4445	104.063	86.9984	225.64	257.402	348.35	482.076	158.628	97.0305	243.202	71.8917	59.4586	50.3074	70.6585	83.7337	188.113	65.5723	153.806	257.545	307.283	215.116	97.9395	128.718	36.425	51.7149	99.0191
1017	8	1	1.5	23.002	40.3865	67.7462	70.4702	39.0743	20.6877	17.0278	22.6732	21.094	19.6089	20.3515	19.9831	19.1761	20.8557	18.6371	23.3016	106.468	62.5489	75.0117	25.4424	18.1086	23.1285	60.8171	23.5061	68.475	176.844	90.6408	78.8893	44.6437	45.4264	21.5482	107.726	79.3138	45.073	64.6014	306.693	129.61	134.564	42.2676	171.319	209.353	115.666	66.482	18.2259	20.8043	23.9817
[truncated: 434 more columns]

## Sheet: Storage(OBS inflow-No Demand)
grand_id	p1	p2	p3	1980-01	1980-02	1980-03	1980-04	1980-05	1980-06	1980-07	1980-08	1980-09	1980-10	1980-11	1980-12	1981-01	1981-02	1981-03	1981-04	1981-05	1981-06	1981-07	1981-08	1981-09	1981-10	1981-11	1981-12	1982-01	1982-02	1982-03	1982-04	1982-05	1982-06	1982-07	1982-08	1982-09	1982-10	1982-11	1982-12	1983-01	1983-02	1983-03	1983-04	1983-05	1983-06	1983-07	1983-08	1983-09	1983-10
753	0.6	0.5	0.1	19251.9	18903.7	18811.4	18830.3	18615.6	18846.8	19550.1	19702.1	19680.2	19807	19934.8	19615.7	19260.4	19118.3	19072.2	18779.3	18197.7	19378.9	20873.7	20960.8	20630.6	20325.5	20201.4	20121	19781.9	19548.9	19973.5	20924.3	21061.7	21057.9	21285.9	21083.3	20932.2	20983	21010.6	20829.2	20668.2	20645.3	21034.8	20963.7	20543.1	20710.6	21068.3	21049.9	20785	20399.3
870	0.6	0.5	0.1	10551.7	10127.4	10300.9	10360.7	9790.89	9129.73	8649.33	8361.88	8089.55	7827.5	7781.18	7781.37	7563.03	7560.16	7828.84	7701.86	7047.24	6644.38	6783.18	7176.59	7092.33	6742.21	6160.64	5652.21	5349.29	5580.39	6576.91	8046.06	8789.02	10037.9	10279.5	10112.1	9706.69	9293.91	9200.14	9450.99	9240.36	8901.2	9451.6	9994.44	9919.77	9430.15	8785.53	8228.76	8164.46	7920.36
597	0.3	0.4	0.3	9331.66	9239.2	9336.62	9381.28	10448.3	12486.1	13455.4	12710.9	11415	10461.3	9822.66	9568.28	9308.13	8994.78	8660.32	8253.06	7913.8	8010.35	7961.93	7575.09	7119.76	6949.37	6811.26	6553.38	6210.94	5880.55	5831.55	5862.04	6640.28	8323.97	9726.33	9950.02	9986.31	9981.88	9989.15	9980.52	9884.49	9831.41	9931.87	9992.38	10477.8	13620.3	17142	17117.2	16436.7	15522.7
307	0.5	0.3	0.3	9272.64	8725.1	8188.92	7753.24	7303.8	7233.36	7589.46	7275.5	6786.36	6256.04	5862.66	5500.9	5116	4832.15	4607.79	4406.76	4241.7	5608.53	6435.38	6186.78	5673.61	5189.83	4756.53	4382.09	3990.93	3698.36	3801.19	4005.39	4074.64	5009.09	6227.79	6291.66	5954.29	5618.73	5322.03	5028.4	4747.09	4490.65	4341.18	4151.44	3964.36	4012.75	4135.63	4154.57	3891.79	3598.12
1753	0.4	7	0.4	4265.9	4716.47	4334.71	4814.35	4601.42	4720.04	4653.23	4594.81	4603.15	4714.27	4644.26	4649.73	4660.77	4268.67	4755.95	4015.36	4850.24	166.511	328.097	363.656	339.536	100.562	0	201.319	260.113	315.989	349.931	394.38	262.473	25.731	18.6486	307.881	348.66	509.895	447.646	251.142	419.807	332.529	329.58	344.927	349.809	445.882	358.725	392.651	195.125	20.395
297	0.4	1	0.6	5382.66	5104.3	4973.57	4919.34	6185.91	7400.37	7432.06	7315.14	7014.02	6643.49	6246.55	5811.55	5410.8	5184.78	5154.32	5171.78	5666.03	7337.54	7434.2	7433.03	7324.47	6997.38	6592.65	6144.92	5650.65	5217.22	5189.44	5183.29	5399.93	6953.52	7434.2	7425.83	7294.1	7059.92	6739.69	6317.32	5885.91	5489.52	5200.67	5183.09	5440.39	7039.86	7434.2	7424.54	7258.59	6907.55
1036	1	0.3	0.3	4659.52	4643.21	4651.14	4654.76	4654.39	4647.72	4654.99	4647.41	4652.66	4630.45	4632.54	4651.24	4626.73	4617.02	4636.14	4637.06	4640.2	4652.7	4632.46	4648.51	4631.52	4621.94	4644.93	4640.14	4645.69	4721.89	4663.74	4656.65	4650.81	4643.64	4656.48	4648.43	4649.49	4639.86	4637.27	5111.84	5460.05	5007.72	4710.93	4698.18	4927.44	4808.45	4654.29	4654.13	4657.52	4633.84
989	7	2	0.2	3871.42	3878.64	4204.39	4439.58	4462.18	4434.95	4396.32	4334.83	4291.58	4197.47	4112.85	3993.14	3904.44	3814.56	3725.84	3625.81	3703.06	4309.84	4478.33	4445.24	4335.56	4343.93	4448.63	4434.04	4423.96	4426.77	4453.75	4461.52	4405.13	4442.99	4460.9	4426.47	4426.83	4442.73	4419.41	4320.45	4463.6	4431	4443.24	4487.81	4905.55	4476.13	4440.94	4423.93	4371.82	4384.32
1026	5	0.3	0.1	1211.1	1190.16	1310.36	1539.78	1604.63	1640.65	1677.77	1639.22	1598.85	1514.24	1393.17	1321.5	1254.76	1149.44	1053.97	996.477	998.938	1148.3	1346.5	1487.26	1556.83	1547.45	1565.59	1538.42	1556.71	1688.81	1691.61	1685.67	1681.67	1680.77	1692.65	1668.01	1668.64	1623.96	1585.68	1690.88	1700.5	1658.17	1691.97	1683.72	1701	1686.82	1689.58	1689.57	1674.13	1639.43
1848	5	1.5	1	856.58	717.214	702.959	1071.65	1140.08	934.903	684.082	437.902	360.768	320.055	339.874	366.92	363.403	364.572	364.615	365.992	363.118	366.054	362.868	358.441	347.133	345.651	365.986	363.891	357.901	368.688	364.795	365.546	368.486	365.322	365.069	355.294	359.002	361.745	361.066	465.23	940.046	975.208	1019.32	1102.93	1292.78	1394.29	1153.21	841.281	570.518	363.63
1869	2	2	1	2316.51	2354.2	2609.51	3240.94	3286.64	3108.36	2896.95	2691.59	2433.67	2288.66	2286.79	2290.54	2267.24	2301.45	2335.22	2340.71	2319.64	2320.92	2311.41	2276.4	2239.99	2207.36	2179.06	2148.13	2209.52	2331.64	2345.32	2412.5	2456.43	2338.1	2327.54	2324.98	2313.17	2317.33	2316.8	2645.79	3284.87	3352.86	3328.8	3340.58	3344.5	3276.91	3069.58	2866.38	2645.36	2419.22
7313	0.7	0.2	0.1	1108.74	1010.61	1002.72	1007.14	1211.37	1666.64	1728.52	1511.36	1246.12	1177.81	1177.27	1172.45	1126.31	1051.12	1003.76	1002.11	1161.35	1781.04	1726.61	1490.36	1187.88	1007.65	1008.69	1009.11	1002.83	1001.14	1009.71	1024.64	1227.24	1725.01	1809.67	1652.01	1451.6	1421.01	1457.83	1471.06	1419.39	1365.29	1325.2	1315.79	1383.5	1682.25	1745.2	1673.77	1536.99	1524.48
1042	2	0.4	0.1	1706.35	1705.77	1706.91	1707.8	1708.31	1705.65	1707.67	1704.56	1707.1	1700.74	1705.55	1707.17	1705.51	1707.52	1706.29	1700.27	1707.13	1707.93	1708.96	1706.47	1696.99	1698.84	1707.09	1708.64	1698.79	1715.13	1709.77	1707.95	1707.23	1708.53	1707.98	1706.4	1700.72	1705.79	1699.91	2011.05	2091.84	1959.95	1809.09	1750.91	1865.45	1816.84	1715.19	1708.72	1702.94	1707.09
884	0.2	0.1	0.1	2343.6	2343.57	2343.57	2343.6	2343.6	2343.6	2343.6	2343.6	2343.6	2343.6	2343.6	2343.6	2343.44	2343.45	2343.6	2343.6	2343.6	2343.6	2343.6	2343.6	2343.6	2343.54	2343.44	2343.6	2343.6	2343.6	2343.59	2343.6	2343.6	2343.6	2343.6	2343.6	2343.6	2343.6	2343.6	2343.6	2343.6	2343.6	2343.6	2343.55	2343.54	2343.6	2343.55	2343.6	2343.6	2343.6
1144	0.5	7	0.1	877.686	879.803	885.04	879.985	870.472	881.349	882.024	880.569	879.01	855.751	883.795	862.092	881.917	876.351	877.102	882.322	874.644	866.977	887.434	877.18	879.241	860.57	974.706	882.27	875.106	873.729	894.106	878.122	851.485	1342.27	1243.51	878.284	876.435	876.446	878.448	1071.8	2150.66	2288	2288	2288	2288	2288	2278.06	2149.08	1899.67	1569.12
1006	1.5	1.5	0.2	1364.04	1382.4	1430.09	1440.47	1440.93	1437	1428.3	1404.59	1387.36	1374.2	1373.09	1367.76	1359.6	1350.42	1345.75	1341.8	1359.67	1413.57	1441.3	1426.75	1426.8	1426.23	1437.26	1434.07	1434.92	1437.93	1440.62	1440.5	1437.05	1440.35	1440.02	1407.09	1427.71	1435.31	1433.03	1436.77	1441.68	1440.6	1439.12	1440.39	1472.26	1441.47	1426.02	1419.21	1407.02	1410.54
1048	0.6	5	0.2	1627.45	1731.82	1896.36	2063.1	2063.1	2063.1	2058.8	2000.27	1934.68	1832.07	1746.41	1656.82	1585.95	1543.29	1485.2	1000.16	754.535	778.38	792.991	796.707	751.126	765.538	771.657	802.412	766.774	544.583	785.999	807.154	745.01	1030.49	889.465	808.634	782.978	745.255	697.349	676.527	683.438	785.822	763.544	778.468	783.298	793.16	802.416	816.461	794.265	690.913
1032	4	2	0.1	1523.55	1515.02	1606.36	1916.86	1923.27	1910.14	1863.13	1794.77	1736.37	1680.53	1627.34	1569.45	1522.73	1464.41	1413.47	1370.48	1311.34	1245.81	1223.01	1124.28	1017.75	916.082	862.088	848.918	747.843	285.785	184.067	185.791	156.344	371.214	547.219	310.095	185.548	167.363	139.846	147.135	183.135	169.744	183.215	356.958	774.403	953.34	969.008	900.887	715.017	266.956
355	1	0.3	0.3	1191.99	1159.53	1147.61	1155.36	1156.28	1216.63	1212.59	1187.86	1207.12	1221.27	1218.27	1218.66	1206.75	1180.8	1159.62	1124.64	1095.41	1227.88	1206.13	1120.4	1039.62	1021.03	1041.44	1056.73	1049.94	1032.95	1064.28	1096.53	1070.81	1134.84	1220.29	1218.79	1213.2	1220.04	1221.17	1220.12	1218.15	1220.49	1220.5	1217.94	1215.53	1229.53	1349.76	1247.8	1217.97	1219.39
1101	0.9	4	0.8	187.889	172.489	204.216	689.525	920.945	956.808	934.915	904.808	850.719	806.46	780.373	819.701	802.271	782.284	802.921	861.059	861.325	917.431	988.768	983.968	950.784	912.756	850.304	798.99	771.464	869.659	972.352	1050.31	1130.59	1103.29	1078.18	1049.3	1052.03	1026.84	992.174	1072.91	1118.65	1099.46	1049.59	1066.38	1073.03	1027.45	1045.57	1018.36	971.551	911.99
1023	10	7	0.1	1054.78	1115.95	1124.07	1127.97	1132.58	1126.97	1123.64	1107.11	1102.42	1079.56	1054.55	1035.9	1018.84	1001.38	989.976	979.517	989.966	1086.71	1133	1112.23	1107.54	1114.71	1126.56	1133.62	1126.94	1075.69	1130.53	1132.61	1105.85	1138.64	1136.74	1130.84	1126.91	1114.35	1097.75	1087.26	1089.13	1114.46	1118.85	1128.54	1126.35	1127.49	1132.38	1122.49	1083.5	1082.24
1864	0.7	1.5	1	1040.1	1044.09	1074.41	1182.51	1133.52	1038.22	1027.39	1031.23	1027.5	1024.62	1034.53	1043.18	1042.03	1025.17	1040.93	1043.17	1040.17	1039.6	1036.97	1034.77	1038.18	1038.01	1041.32	1037.43	1009.29	1042.36	1044.39	1035.27	1043.72	1032.83	1041.24	1025.73	1042.48	1041.63	1038.88	1097.23	1245.16	1195.08	1148.7	1112.41	1109.58	1083.44	1041	1037.74	1016.65	1040.94
1021	7	0.3	4	1146.09	1156.78	1166.09	1204.98	1221.4	1220.79	1215.88	1198.49	1181.89	1168.94	1159.06	1147.79	1139.97	1132.95	1127.17	1120.67	1136.75	1174.1	1170.6	1164.97	1187.65	1200.45	1221.4	1221.4	1220.54	1221.38	1221.37	1218.91	1221.22	1221.4	1221.38	1217.83	1205.45	1191.71	1181.77	1178.93	1176.98	1180.59	1201.56	1221.4	1221.4	1221.4	1217.82	1200.08	1188.32	1190.33
1120	0.4	2	0.3	684.745	684.216	683.323	682.349	681.997	689.758	683.834	676.802	669.595	667.808	665.762	665.32	663.011	659.103	659.256	659.177	661.55	682.565	680.657	678.281	680.016	687.741	697.454	696.493	693.417	695.172	699.215	702.277	757.331	807.287	803.104	803.777	799.732	796.589	793.091	791.83	793.43	799.14	804.951	798.953	788.426	789.039	790.04	781.191	774.658	799.331
182	0.3	0.4	0.1	1050.82	1102.7	1102.7	1102.7	1102.7	1102.67	1100.13	1076.16	1030.56	999.11	941.261	924.897	916.33	926.346	968.397	1074.2	1088.11	1006.14	870.194	775.109	768.067	768.204	839.491	1082.92	1102.7	1102.7	1102.7	1102.7	1102.7	1102.7	1102.21	1102.52	1097.82	1091.71	1102.7	1102.7	1102.7	1102.7	1102.7	1102.7	1102.7	1102.7	1102.7	1102.69	1102.55	1095.56
7311	0.2	0.4	5	971.571	967.453	980.315	1048.23	1048.98	1046.14	1037.71	1023.74	1012.26	998.859	989.921	980.552	972.991	959.265	949.422	940.762	936.234	949.124	945.724	935.691	926.892	916.131	917.362	917.012	911.853	908.607	918.999	925.898	938.529	1047.01	1048	1043.89	1037.36	1028.04	1020.04	1012.03	1020.02	1047.79	1049	1049	1049	1048.67	1046.73	1038.48	1027.31	1019.72
1755	1	2	0.7	86.1846	92.1424	121.824	163.226	117.469	98.2492	97.6822	98.0483	96.1934	94.8371	90.977	91.4347	91.6554	99.1487	112.115	87.8511	92.869	126.699	112.822	97.9298	97.6115	95.2412	85.9899	93.2983	155.289	249.978	275.534	208.131	130.891	97.507	97.5333	97.1553	80.342	97.7531	94.2203	63.3747	98.5097	97.2557	98.2103	97.9634	279.828	510.33	506.945	465.214	413.443	200.498
1192	0.5	4	0.3	931.3	931.3	931.249	931.3	931.3	931.28	928.262	918.348	908.502	913.242	923.911	931.173	931.205	931.139	931.155	931.266	931.275	931.3	931.103	930.724	930.931	931.19	931.2	931.103	931.226	931.3	931.262	931.226	931.235	931.266	931.112	928.443	923.677	931.06	931.169	931.3	931.287	931.3	931.3	931.231	931.205	931.215	931.063	930.96	928.955	927.946
541	7	0.1	6	477.582	425.884	378.712	368.606	478.942	766.221	917.286	853.847	748.576	652.116	593.635	534.804	477.074	419.108	371.808	367.053	367.208	376.486	376.812	367.69	367.543	367.555	367.38	366.634	367.139	367.237	366.975	367.058	415.197	586.892	719.877	701.832	662.526	637.753	608.98	559.726	501.665	446.339	394.916	367.921	383.174	615.041	857.694	892.236	837.225	741.552
1716	0.4	6	0.4	498.273	438.994	409.921	466.953	479.513	482.704	481.789	476.229	471.195	469.26	471.196	478.399	483.457	504.13	494.067	499.847	454.181	431.786	439.491	442.222	443.349	442.84	446.468	451.591	477.266	504.028	515.087	513.001	517.063	496.645	499.052	494.347	494.663	496.455	497.55	392.26	479.2	520.721	498.212	511.731	503.493	475.626	480.081	477.023	475.251	406.095
1883	0.5	0.6	10	574.531	597.532	610.872	638.773	659.73	670.409	665.577	656.056	633.478	605.279	578.434	571.902	564.76	564.612	565.929	563.748	567.346	601.752	606.676	608.231	605.82	600.952	597.675	593.483	598.271	599.615	597.687	596.972	600.27	598.032	580.283	555.981	524.97	421.045	297.146	279.018	289.384	287.399	288.966	288.299	287.278	288.772	288.412	288.045	288.049	288.095
895	1.5	0.3	0.1	396.711	398.706	386.919	397.541	396.62	401.766	394.884	397.023	396.406	400.4	395.646	410.304	398.723	398.809	386.817	391.057	399.515	391.435	395.178	398.701	395.499	399.577	411.043	400.791	396.521	399.267	374.969	392.694	399.684	396.421	398.121	396.472	399.369	397.341	395.158	410.18	392.825	402.051	393.901	405.844	378.673	405.957	379.21	394.938	395.205	397.198
1093	0.4	3	1	329.927	350.219	361.043	364.454	363.569	358.862	343.059	331.42	313.322	290.964	292.955	314.766	322.064	323.908	363.707	361.759	353.81	412.841	370.292	363.998	363.671	355.158	366.499	362.824	349.718	366.538	365.708	362.326	359.853	404.347	360.447	349.667	339.53	318.964	306.876	362.771	367.758	362.769	365.28	363.006	407.893	401.643	345.609	336.775	326.105	310.765
1709	10	0.5	0.7	509.898	509.856	509.9	509.9	509.892	508.291	506.058	506.755	497.356	464.536	445.73	499.529	505.236	509.523	509.9	509.9	509.9	509.9	508.365	509.9	509.053	503.168	509.898	509.9	509.9	509.9	509.9	509.9	508.193	509.888	509.525	506.462	488.311	462.06	468.774	509.9	509.766	509.9	509.9	509.9	509.9	509.856	507.438	500.351	465.097	415.969
1017	8	1	1.5	183.284	193.636	200.626	200.946	201.403	200.422	198.224	189.892	184.544	180.47	177.002	177.114	176.826	176.076	179.964	185.741	195.297	200.925	200.599	202.121	200.689	196.462	186.16	199.269	200.097	206.91	206.444	200.879	201.712	200.117	201.538	192.033	202.213	201.236	199.73	304.795	326.1	250.613	201.462	200.215	325.638	286.744	209.865	198.578	192.936	189.608
[truncated: 434 more columns]
