# Supplementary material for: The value of observed reservoir storage anomalies for improving the simulation of reservoir dynamics in large-scale hydrological models
Source: Copernicus journal article supplement (doi:10.5194/hess-29-4073-2025), 2025-09-03
Supplement: Supplementary file 9 [file SA_results_calibrated_against_storage.xlsx]

## Sheet: Readme
	Sheet name	Note	Inflow source	Total number of reservoirs	Number of reservoirs where downstream demand is taken into account
	Outflow(WG inflow-No Demand)	Simulated outflow (×106 m3/month) where downstream demand is not considered for irrigation and supply reservoirs.	WaterGAP	100	0
	Storage(WG inflow-No Demand)	Simulated storage (×106 m3) where downstream demand is not considered for irrigation and supply reservoirs.	WaterGAP	100	0
	Outflow(WG inflow-With Demand)	Simulated outflow (×106 m3/month) where downstream demand is considered for irrigation and supply reservoirs.	WaterGAP	21	21
	Storage(WG inflow-With Demand)	Simulated storage (×106 m3) where downstream demand is considered for irrigation and supply reservoirs.	WaterGAP	21	21
	Outflow(OBS inflow-No Demand)	Simulated outflow (×106 m3/month) where downstream demand is not considered for irrigation reservoirs.	Observed	35	0
	Storage(OBS inflow-No Demand)	Simulated storage (×106 m3) where downstream demand is not considered for irrigation reservoirs.	Observed	35	0

## Sheet: Outflow(WG inflow-No Demand)
grand_id	p1	p2	p3	1980-01	1980-02	1980-03	1980-04	1980-05	1980-06	1980-07	1980-08	1980-09	1980-10	1980-11	1980-12	1981-01	1981-02	1981-03	1981-04	1981-05	1981-06	1981-07	1981-08	1981-09	1981-10	1981-11	1981-12	1982-01	1982-02	1982-03	1982-04	1982-05	1982-06	1982-07	1982-08	1982-09	1982-10	1982-11	1982-12	1983-01	1983-02	1983-03	1983-04	1983-05	1983-06	1983-07	1983-08	1983-09	1983-10
610	0.4	0.5	0.1	2204.19	4583.12	3663.81	2124	3935.16	4905.99	2053.4	1500.43	1484.12	1556.25	1510.86	1555.91	1541.14	1378.83	1864.78	1614.93	1428.72	1316.6	1171.78	1128.47	1118.39	1153.72	1112.58	1147.02	1169.95	1177.76	1142.85	1028.76	1120.14	1107.92	1131.84	1135.56	1099.46	1134.44	1094.21	1252.68	1118.71	1081.69	1227.01	1628.41	1125.08	1094.29	1231.51	1202.18	1109.88	1405.43
753	0.6	0.5	0.4	1536.98	1547.77	1758.75	1826.2	1744.02	1618.93	1526.24	1636.88	1734.11	1777.41	1381.86	1471.58	1413.2	1258.25	1481.83	1409.54	1864.48	1671.14	1495.66	1594.02	1661.4	1487.8	1344.14	1403.03	1446.97	1230.4	1601.19	1976.75	1687.2	1739.8	1665.19	1725.83	1808.74	1966.78	1820.31	1881.62	1964.7	1609.47	1995.59	1854.21	2050.93	1873.8	1690.99	1854.33	1898.97	2014.93
870	8	0.5	0.5	2730.6	1608.94	2676.71	1749.85	2635.99	1713.7	1746.37	1774.11	1733.13	1799.44	2634.56	1782.82	1802.33	2516.34	1775.45	1723.05	1790.28	1737.83	1732.04	1754.76	1722.31	1772.87	1709.59	1763.29	1758.36	1584.47	1987.14	3269.54	4095.61	2358.11	2545	2625.21	1705.37	2771.32	2596.92	1774.36	2649.45	1613.53	2740.69	2658.73	2631.43	2516.33	1802.81	2658.94	1725.07	2649.54
597	0.3	0.9	0.1	888.395	2270.91	3108.63	3599.92	6398.19	3648.5	843.779	725.251	825.297	835.418	757.078	765.057	750.281	654.99	764.747	924.982	823.263	658.283	582.154	613.257	780.299	1004.27	834.884	716.22	714.275	696.873	912.801	731.489	856.183	1031.96	677.973	736.517	839.916	842.825	762.262	796.635	762.978	764.403	2304.62	2526.59	4198.83	4225.24	1375.62	723.726	774.756	832.103
307	0.2	0.4	0.1	256.607	266.789	302.992	317.215	248.865	308.087	220.424	277.413	294.052	291.866	274.435	279.121	280.078	264.777	291.885	300.769	525.031	1240.66	275.705	277.901	300.108	305.449	291.279	292.976	294.279	290.356	1138.14	2373.57	1640.97	3068.51	772.382	274.433	289.275	507.972	546.012	625.638	672.414	514.204	654.125	692.952	615.255	354.771	267.697	263.617	317.102	315.069
1753	0.6	10	0.3	9028.68	9545.83	20654.5	9829.64	5824.8	3354.59	1935.74	2041.45	1978.21	2132.2	2026.57	2169.88	2269.2	8410.92	5541.98	4630.73	3275.2	2113.24	1776.81	1908.93	1723.65	1555.31	797.828	1994.6	12577.9	10431.2	9981.54	6080	3397.28	1783.02	1983.47	2054.79	2015.61	1916.79	1945.58	12991.5	9387.97	9435.75	6207.28	12524	12156.3	4122.12	3719.2	1724.77	1729.96	1783.97
297	9	0.8	0.7	430.208	657.169	982.061	1279.06	892.983	834.376	823.492	1193.03	930.084	872.584	950.995	968.571	741.697	755.45	634.504	1012.47	1078.2	989.418	2101.6	780.681	1042.71	1024.32	856.039	848.403	658.079	951.799	609.329	955.659	1017.76	816.614	674.343	1000.28	1040.56	824.63	609.578	821.711	725.986	694.254	733.205	1051.97	740.325	729.19	867.378	846.806	697.433	800.391
1036	7	0.9	0.4	387.793	317.926	327.29	380.6	428.139	257.402	316.328	316.465	303.117	310.985	313.29	306.209	309.349	293.496	288.245	283.022	321.018	278.377	267.693	289.039	273.882	318.021	273.417	316.843	400.555	264.46	217.192	276.56	292.85	401.395	297.759	318.092	298.766	319.517	461.56	908.572	670.821	662.297	761.788	835.864	688.707	592.731	440.605	416.228	393.763	447.873
989	0.3	2	0.5	368.598	722.104	544.577	500.4	517.746	522.912	521.517	549.721	494.45	512.371	446.876	324.319	235.454	366.084	364.073	298.118	706.689	780.416	606.259	643.836	548.087	630.693	781.721	764.557	919.309	1441.55	862.049	631.249	842.888	1338.61	737.689	682.098	560.116	576.056	616.581	1040.85	633.514	835.068	777.057	2991.65	1718.73	735.369	575.175	567.897	561.187	876.675
1135	8	1.5	0.2	129.685	175.077	133.763	140.221	242.655	200.366	118.447	139.641	260.94	218.336	215.289	459.06	155.046	144.509	452.995	210.49	338.249	307.595	158.275	176.521	140.661	1670.68	738.089	486.171	492.752	478.958	446.796	302.913	1504.02	983.818	1010.99	753.819	347.076	266.62	235.132	301.854	338.602	800.878	625.243	556.485	559.821	407.265	243.45	198.061	139.065	1406.69
1269	0.8	0.1	0.1	768.788	630.402	669.515	858.973	708.932	571.166	649.153	155.295	99.306	184.056	143.711	147.613	146.684	171.513	207.779	120.232	195.963	504.981	192.058	98.4566	140.926	124.834	173.854	164.017	203.394	377.548	265.548	602.839	392.516	229.285	138.964	120.851	100.111	146.334	342.825	1087.1	581.827	932.825	700.791	713.801	921.361	652.668	705.58	691.514	536.76	122.088
1077	5	0.3	0.1	275.008	273.849	208.498	241.43	377.687	291.658	229.052	240.357	230.574	240.589	232.952	268.86	215.216	229.846	277.829	193.368	241.204	250.424	180.914	230.918	92.8639	351.424	223.358	210.479	287.165	808.526	455.841	348.143	1378.52	1271.99	434.923	366.462	238.149	244.824	246.16	329.837	397.407	948.081	715.865	653.849	826.724	555.413	228.778	244.017	234.049	1612.62
1026	0.4	0.2	0.1	141.652	272.674	299.108	224.503	257.964	297.883	189.984	130.287	126.452	135.006	158.19	142.174	145.123	166.925	230.313	147.847	304.522	270.023	222.123	305.494	113.967	238.421	258.313	300.035	404.936	258.515	227.862	268.978	284.763	326.903	250.623	354.124	212.527	172.887	260.91	501.331	297.453	305.193	309.685	504.815	629.404	262.981	301.298	296.996	284.171	384.322
740	1.5	3	1	48.2002	34.1982	36.6587	32.5908	10.4068	9.83216	10.3037	11.1247	12.4949	12.4465	12.2917	12.472	12.0957	10.8156	11.6562	11.1819	11.0265	11.8249	11.7927	11.1174	11.5572	30.0258	19.4202	38.0669	38.5196	33.8967	28.4799	14.5673	11.611	11.2082	11.5574	11.305	11.3329	37.3475	37.5886	37.552	22.522	11.6442	23.6334	11.9002	10.7182	10.7854	11.1574	10.9269	12.4083	30.0572
1294	1.5	1.5	0.1	31.2844	22.996	23.9016	39.6492	117.256	17.4631	22.4036	13.782	49.7725	24.7187	84.4268	63.3872	92.3363	85.6705	271.567	200.695	174.936	462.215	282.839	185.565	153.091	196.859	186.848	165.023	158.233	146.954	153.009	83.7339	103.582	71.3097	67.8289	67.3928	55.7845	57.3549	58.7615	73.3717	92.863	175.264	228.578	94.1881	110.569	83.6136	64.4449	65.9938	54.9393	46.0708
1848	1.5	0.7	1.5	445.453	200.15	486.64	162.996	182.869	231.229	226.798	223.021	147.711	28.4524	270.779	59.8447	92.2697	190.369	216.442	66.5272	54.5925	72.9837	39.0528	25.4881	20.8311	23.2043	23.9552	50.5901	361.888	190.906	171.925	311.324	125.43	43.4646	26.8347	31.9934	20.7708	26.1492	203.696	390.59	155.739	257.006	208.938	438.886	308.924	149.75	233.471	223.926	222.084	130.604
1869	0.8	2	1.5	496.628	285.513	835.495	440.298	451.319	407.113	379.523	345.719	83.4683	43.1377	45.268	47.5395	69.8322	182.796	286.195	111.798	75.0907	42.2368	41.3168	30.9798	34.5468	36.6889	36.6131	40.723	181.417	327.51	191.246	603.278	200.651	220.61	40.89	46.8327	34.1575	38.6057	42.0864	1005.41	482.869	683.394	652.529	865.218	902.149	422.976	443.31	368.106	362.752	92.0968
1863	0.6	0.5	0.1	186.872	84.284	387.028	112.953	137.753	109.659	111.562	114.992	124.142	138.084	115.677	105.36	109.877	166.324	92.4529	101.092	106.6	103.686	100.151	92.8214	77.8328	82.9892	72.2309	193.699	109.395	104.923	82.8179	143.857	80.6051	101.728	104.411	102.606	86.478	95.1816	143.989	114.648	86.7002	128.069	131.169	94.9771	108.336	101.852	108.057	106.755	105.989	104.83
1770	8	1	0.6	199.585	86.065	137.311	103.265	143.025	107.08	89.4806	88.2257	82.8268	83.552	89.9859	114.786	115.506	154.785	56.3921	103.903	65.3197	113.798	65.9503	81.5035	78.6265	84.5531	99.4359	166.767	112.335	77.8681	127.807	114.057	98.0302	85.8572	87.8412	86.9886	84.8179	82.5042	159.187	166.416	75.3583	98.6973	73.2392	113.641	173.796	75.3973	85.8919	88.3109	83.3657	87.7318
965	0.7	4	1	120.484	92.2449	181.3	102.807	101.023	95.1939	72.0055	129.374	102.574	129.05	88.557	24.0069	16.7557	27.8614	35.9326	29.9684	84.4115	12.782	13.9775	38.0466	28.1299	16.6176	28.9855	68.856	63.1582	125.298	123.567	72.4017	216.038	90.051	110.236	111.986	119.578	120.203	115.325	125.17	157.716	146.034	200.023	113.486	120.709	223.401	102.296	109.304	122.167	138.467
1247	2	2	0.5	67.9035	97.4501	80.6501	86.6929	121.784	64.9664	71.4233	81.2316	180.543	77.5366	129.333	287.884	107.212	79.3027	191.687	113.297	82.4062	93.4116	97.4231	91.8895	88.9198	598.664	240.955	385.207	177.09	183.596	161.513	117.956	454.833	346.535	225.786	138.23	104.114	99.385	88.8799	98.0361	107.487	150.532	137.146	128.969	98.6676	105.638	83.0878	89.9875	87.215	91.1904
7313	0.3	0.1	0.1	242.301	233.488	342.772	767.273	875.615	1171.63	227.616	201.14	330.332	241.892	234.857	246.053	238.715	263.985	451.087	585.669	1404.85	909.39	207.909	189.317	243.06	332.242	224.902	244.808	219.306	283.64	931.69	1685.18	1576.1	1109.29	303.636	212.248	280.765	273.752	239.713	365.677	514.659	445.596	1111.84	910.642	790.538	566.864	277.777	222.999	249.463	287.603
1287	7	0.1	0.8	913.941	613.003	332.748	611.592	413.138	329.684	346.236	350.999	103.262	496.009	95.5363	379.651	320.658	104.103	451.904	105.086	376.295	1584.19	656.84	342.115	357.745	1277.98	929.953	612.298	337.504	718.038	590.3	361.145	1373.78	743.886	575.372	597.73	354.731	109.8	373.147	1346.35	534.048	1332.68	1083.76	522.303	786.095	520.406	587.64	374.542	102.295	371.177
1186	0.7	0.6	3	633.801	230.314	336.729	259.42	146.759	32.658	34.2354	26.7683	27.2854	32.3836	31.0269	31.9205	30.2642	28.6251	34.2832	29.8442	47.1448	134.522	55.6465	35.6171	36.8683	42.9733	44.0678	30.0603	42.6021	170.142	23.8834	27.9484	30.6705	44.236	26.273	27.1876	26.3378	31.3201	34.2916	336.017	42.1441	313.46	172.73	25.1794	59.9406	44.4583	34.5871	26.4448	26.5948	30.1093
1042	0.6	0.2	0.1	31.8572	22.2203	22.3856	18.574	17.2051	17.9744	18.5008	18.4599	17.7803	18.3638	21.0475	18.0639	23.6336	22.7829	19.728	17.4034	23.1824	17.3933	16.0251	18.0027	17.3262	24.6339	20.054	17.7947	33.6299	33.6027	40.0098	53.5794	48.6794	27.7384	16.0378	18.7028	17.6304	18.4347	32.8213	84.6948	45.5169	52.678	66.027	87.0311	54.1328	52.8779	59.3316	58.9817	56.357	84.717
884	7	0.1	0.3	3003.1	2678.81	2712.16	2702.49	2707.76	2697.36	2701.35	2544.03	1920.39	1929.46	1921.64	2740.3	1935.93	1901.8	1948.85	1928.55	2743.17	1920.66	1936.96	1861.22	1961.75	1944.46	1924.45	1936.61	1936.96	1905.38	1958.52	1915.38	1953.85	1968.02	1945.4	2033.93	1923.85	2756.97	1908.03	2752.86	1944.1	1916.91	2740.53	1939.98	1923.19	2741.9	1942.68	2800.22	1927.86	2728.36
1273	1	8	0.1	8.31895	7.95476	35.7992	7.22045	68.8533	4.71285	3.84096	2.25406	48.3342	9.97282	12.3548	12.3066	7.45129	7.34684	50.6909	38.3938	26.6587	105.316	5.84499	6.87516	6.7365	49.3503	43.2301	26.2368	35.3187	87.377	76.3892	6.75809	177.309	66.4861	44.4597	26.1454	26.2906	27.2914	7.5306	44.9652	9.75734	45.833	61.6052	43.1634	27.1155	26.3932	7.14116	7.10488	7.2716	8.08979
961	0.1	1	0.4	0	0	0	0	0	0	0	0	0	0	0	0	0	0	0	0	0	0	0	0	0	0	0	0	0	0	0	0	0	0	0	0	0	0	0	0	1.69639	1.55658	2.08222	9.70836	16.9131	14.5637	15.8011	16.4511	16.6331	20.2296
1144	0.3	10	2	1256.11	1555.82	1187.66	1061.54	1200.11	900.992	548.29	415.123	451.626	1363.52	865.952	1385.61	780.857	860.852	1009.43	804.302	955.339	1900.57	996.983	801.695	618.552	2093.28	1810.31	1273.39	1239.24	2195.8	1507.52	984.115	2377.64	2990.45	1627.94	1059.47	916.886	859.586	841.105	4131.85	1655.64	2003.28	1848.85	1414.81	1772.37	1138.41	1150.82	807.796	732.236	663.751
616	10	0.3	0.1	1345.6	4613.52	3662.98	1825.65	3539.65	4410.35	2201.26	1978.87	1325.27	2047.82	1320.28	2046.9	1343.09	1966.34	1336.36	2031.04	1332.7	2039.01	1330.97	1316.52	2017.29	1318.05	1309.02	2009.5	1323.02	1964.21	1311.21	1318.43	2039.6	1291.84	1320.81	1257.42	1298.34	1320.33	1304.08	1322.31	1320.27	1258.74	1325.04	1303.55	1325.82	1308.88	1343.1	607.911	1301.35	1322.81
911	8	0.9	2	592.163	463.716	631.951	665.178	383.948	406.714	276.93	201.747	213.39	165.936	167.15	141.387	164.516	274.6	112.362	137.246	121.464	129.654	150.234	120.526	125.906	130.013	139.944	154.065	119.683	690.498	1195.03	936.944	1280.5	759.81	694.113	463.609	434.357	443.475	617.636	1118.11	691.569	1408.82	1613.26	1631.39	1291.4	1068.1	1144.1	801.02	803.521	1063.53
1006	0.9	1.5	0.3	32.8865	33.9269	28.959	18.2658	22.2487	22.7603	23.2728	23.2714	22.2116	28.5574	23.6315	25.7896	28.3106	33.5732	19.8257	22.1888	35.6299	31.2962	17.0965	23.9523	22.6859	83.8098	39.5446	61.4086	113.182	78.9304	55.5634	32.6325	27.4177	61.8192	20.75	92.2863	13.1174	23.4133	39.8441	157.21	38.9262	42.6955	26.8698	152.313	94.3604	63.3132	27.7607	23.6978	22.9845	120.054
1048	9	0.8	0.3	393.859	782.803	808.702	1225.92	1532.02	1073.72	756.961	783.457	488.264	371.498	348.706	361.523	328.81	290.212	336.942	283.706	274.496	283.717	245.522	270.531	249.575	259.264	358.135	241.8	291.62	753.5	611.589	382.954	1017.83	1078.12	720.264	769.368	481.107	345.477	297.63	347.069	317.292	507.439	785.162	818.252	918.828	819.275	788.568	775.636	522.988	694.513
1123	0.5	8	0.3	36.9019	165.18	21.1801	23.0228	27.7605	18.9795	22.5884	22.6681	37.7862	15.6495	19.163	344.381	25.3104	25.106	20.8487	18.8545	31.9161	25.3554	19.2201	22.2254	21.7018	25.9854	30.295	17.5125	46.4445	18.5279	71.6683	24.0896	188.523	73.3645	20.7685	23.5595	22.7791	23.4857	28.1939	359.365	15.2105	29.4835	27.0262	20.0622	279.466	15.9839	23.6536	22.3251	21.9664	22.812
1032	9	0.8	0.2	120.185	204.193	369.028	283.785	270.966	127.614	86.9697	82.7173	79.8445	82.9732	78.984	83.4957	79.9577	81.0758	91.2712	73.4954	106.331	82.2054	66.8656	79.0553	74.1535	86.9543	125.129	102.21	240.889	253.863	188.297	121.938	448.31	332.224	310.782	342.308	140.702	105.793	97.4154	240.602	218.586	355.348	352.8	405.691	404.745	320.169	340.872	266.411	111.809	291.438
1774	0.7	1.5	0.3	658.802	582.561	745.022	539.458	546.065	206.395	185.906	138.055	134.391	123.537	121.034	124.136	128.767	244.011	365.784	398.516	261.213	307.577	161.189	118.341	118.264	120.928	114.894	148.591	438.028	734.605	719.787	559.294	448.58	190.739	148.338	142.144	198.625	141.545	253.908	560.463	484.422	662.362	579.905	639.673	519.67	259.852	195.064	152.368	133.076	124.233
1781	4	9	0.5	556.009	592.982	1724.83	940.54	641.751	229.935	270.894	252.593	221.744	66.8203	79.2679	88.5767	154.624	498.453	622.777	597.402	275.124	308.067	241.9	246.156	151.707	51.3552	37.9052	87.902	557.412	1481.92	1213.16	711.063	248.732	267.721	266.457	291.275	185.313	86.4867	226.02	471.96	712.52	1453.83	1461.35	1424.8	670.755	235.472	276.562	271.906	251.848	183.996
355	10	0.1	0.2	36.6023	154.381	168.406	664.073	689.675	207.598	23.029	35.2059	31.9965	58.7769	56.0187	158.922	153.605	208.58	299.765	329.202	1116.45	275.629	25.6072	33.4061	33.9835	34.0331	60.1005	46.254	36.3917	194.206	157.876	472.263	483.264	387.246	22.3745	34.1862	33.0968	53.5983	57.9512	197.371	330.213	277.838	441.023	837.67	1469.09	469.051	24.049	36.3469	53.5199	195.788
1101	0.5	0.7	4	256.589	54.0972	622.182	227.001	90.8075	55.1605	43.0575	43.7908	43.9214	58.8323	125.117	40.6789	52.2988	102.487	261.741	38.8317	45.2011	61.9934	43.8845	44.1716	46.6673	51.6703	51.683	57.4523	90.8302	166.119	62.9352	208.5	97.3271	42.5796	44.1946	50.667	45.3631	57.6278	76.452	640.978	332.209	263.571	138.198	360.313	404.819	88.7722	43.1262	43.2794	45.9651	52.583
1023	1	10	0.1	336.194	563.924	677.835	1041.76	1062.67	756.49	341.451	220.364	227.098	226.513	129.206	233.464	132.988	232.316	134.073	132.306	234.218	133.915	130.947	130.57	22.5067	26.8177	282.269	27.9272	32.0027	366.926	24.9822	26.1524	166.947	252.913	25.4836	122.163	25.7716	25.9834	26.8173	31.0481	38.8398	41.7864	549.987	665.306	444.214	308.948	232.931	231.884	225.689	131.351
1060	0.5	4	0.3	33.1199	40.7347	44.875	19.0038	32.7903	30.4011	30.2969	30.4222	29.8358	31.2666	37.3082	48.9917	31.0085	45.9167	31.334	28.2317	44.5249	28.4886	27.5545	40.2616	26.1318	52.9299	35.5858	37.2835	247.704	23.6063	24.5453	29.9497	35.1951	52.9806	24.6235	33.3537	31.164	32.4941	71.016	260.12	96.0883	57.7215	32.0715	216.248	36.0378	25.5671	32.3567	34.1469	32.3089	37.7468
1864	1	1.5	1	220.416	120.732	366.718	207.791	243.921	182.423	153.7	142.286	116.834	33.0801	62.8402	108.237	74.4728	129.77	129.778	93.1597	54.0275	39.2301	28.2128	12.771	13.6537	14.8936	14.9824	22.2324	166.063	151.396	120.738	249.285	100.935	131.491	85.7268	64.8283	58.9324	93.341	144.929	375.109	240.811	283.512	214.639	342.342	288.94	193.644	232.81	259.677	295.22	203.244
1797	5	0.2	0.1	3399.42	2995.11	5351.23	2712.54	1801.22	1349.56	1462.46	994.045	524.238	997.993	1009.55	1021.52	1060.59	2724.78	2185.25	2481.21	842.331	1441.27	471.005	531.247	509.566	503.718	393.997	648.209	3222.92	4277.3	2986.45	1542.44	1463.93	1009.87	991.478	1031.16	988.686	996.263	1656.68	3253.26	2227.76	3603.79	3289.89	3138.67	2738.54	1239.99	963.591	984.491	989.74	537.556
305	5	0.4	0.8	1760.33	1521.45	1801.36	1919.7	3329.17	3593.42	1735.99	1062.11	2016.34	1617.34	1674.67	2048.72	1728.68	2321.68	1333.25	2275.38	2920.11	3040.16	1553.19	1018.56	1072.25	1693.75	1720.83	1853.17	1774.44	2798.04	2604.26	3145.43	2877.99	2797.84	1869.22	1019.67	1196.84	2437.14	1743.73	1900.59	1851.86	2342.63	1656.11	2227.98	1949.79	1766.63	1719.5	1367.34	1140.9	1478.57
968	10	8	0.1	58.4985	28.1733	291.827	372.342	233.559	111.286	64.7211	53.7023	53.4131	76.8335	52.348	75.0494	52.8527	52.1888	53.6586	74.6127	172.712	25.696	50.9178	56.8959	52.352	54.2654	52.5968	53.4068	78.4207	54.2784	73.1432	67.887	129.654	108.417	59.3412	49.0367	29.6986	51.9543	29.6716	30.3372	32.4857	58.6634	120.728	122.953	87.2177	165.736	52.5355	72.1125	54.7179	55.2551
1019	1	6	1.5	9.2216	39.6672	53.7525	24.0843	28.2148	7.67089	4.15161	4.28721	4.3022	4.62395	4.62763	4.96791	4.85359	9.76213	16.2654	12.4123	54.2042	30.0095	17.971	9.41095	6.26291	5.66641	4.36847	4.61237	53.5811	51.5597	24.4384	34.7285	42.7427	42.5609	21.8704	5.82773	4.64899	4.8069	5.61208	105.619	35.3129	38.5063	57.3204	87.6659	31.324	36.0658	45.6118	46.2533	45.3481	49.5879
1302	4	3	0.3	15.9751	14.2231	16.2907	13.0086	19.9629	6.05935	14.5121	42.204	23.688	16.4402	21.6876	22.4443	40.0413	32.6805	74.5153	43.0728	35.633	223.599	65.5927	19.6006	24.5501	23.7819	23.4411	19.5382	20.5222	16.1107	14.2563	13.9854	21.065	8.14189	22.9764	16.7864	16.2229	16.3748	16.8481	18.3759	18.8047	19.8922	43.9157	16.8012	24.0799	14.6353	16.5639	16.1448	15.9254	16.5045
1824	6	0.8	0.1	8045.84	7018.52	17822.4	8185.47	4697.75	2833.83	2111.62	1872.78	1495.11	1900.37	1773.34	1906.38	2211.47	6612.78	4808.29	4689.98	2206.43	2181.78	1274.92	1111.61	897.442	686.237	691.521	1928.9	11234.7	10543.4	6815.87	4747	2916.64	2123.23	1880.61	1827.65	1619.27	1378.42	1732.34	11190	5912.35	8810.81	6200.08	9914.8	8369.75	3425.51	2275.19	1847.55	1466.81	1365.64
1316	1.5	0.1	0.2	0	0	0	0	0	0	0	0	0	0	0	0	0.660752	0.325365	0.889441	0.898764	1.36243	10.9493	2.54128	4.65982	4.9713	8.67884	4.12715	4.94942	4.45628	4.91469	4.94255	1.2775	11.3037	9.22348	5.40253	3.69844	2.3739	7.00199	2.41999	3.3414	0.90276	0.88097	0.342274	0.856064	0.502277	0.478918	0.250082	0.0488751	2.11914	0.334232
1835	1.5	0.1	0.2	7341.05	6147.46	14048.6	6887.84	4009.93	2436.88	1897.13	1646.49	1391.98	1607.39	1517.13	1416.51	1925.24	5995.68	3985.91	3929.32	2105.78	1802.65	1219.61	876.255	540.619	860.149	535.126	1863.13	9075.22	8765.99	6609.49	3354.02	2538.44	1921.39	1651.18	1711.83	1379.92	1402.65	1695.55	8278.52	5010.76	7044.09	5492.97	7403.17	6280.05	2867.64	1835.69	1633.62	1092.03	1389.51
1847	2	0.1	0.2	5805.44	5007.26	11559.6	5528.1	2944.08	2060.03	1626.21	1348.5	1048.25	1383.16	1110.05	1410.44	1482.06	4856.81	3327.35	3716.35	1656.69	1519.45	1184.21	736.625	431.982	476.283	730.734	1469.32	6487.35	8013.67	5366.29	2734.66	1861.05	1646.46	1338.12	1401.26	1336.43	1071.55	1545.62	6635.63	3867.29	5831.24	4587.34	5781.27	4221.76	2418.12	1578.52	1335.8	1035.98	1062.98
1231	5	3	0.3	59.3833	79.6003	64.5712	56.49	46.3778	26.3923	26.9655	27.32	26.9885	29.9305	29.056	29.8559	28.8674	26.2257	30.0809	28.2448	44.5883	127.881	58.5814	26.3798	27.9388	49.2605	78.7563	58.7469	48.34	61.5088	53.5188	44.8332	50.5045	36.1277	28.0142	27.4488	26.8086	29.7905	35.2282	241.492	74.7121	182.147	78.3346	58.7685	56.8982	44.8648	36.335	28.1936	27.3279	29.1387
1140	0.9	5	0.8	9.3897	5.59996	1.16584	14.829	9.83554	4.28021	5.05556	3.76842	6.51022	1.99056	13.2761	5.55894	5.53837	2.8859	7.6515	3.65643	8.2409	6.1635	4.77943	3.40013	1.25157	13.2688	0.874208	4.2489	13.3941	6.58733	0.754482	25.1528	16.1981	5.45555	1.11313	3.3361	1.05236	0.653475	9.46801	13.117	13.5327	4.03216	2.66143	1.60849	4.36307	5.11882	4.66197	3.47733	0.954978	17.7024
1296	10	0.5	2	118.327	36.7099	52.2076	48.5699	64.0036	38.4466	44.8122	47.0678	27.1589	4.49787	5.71925	5.00021	5.44545	12.0161	5.73509	5.59564	8.70796	62.457	11.9088	8.68984	6.88079	39.8805	22.9758	12.3271	12.6689	10.3247	10.5429	13.9934	43.359	12.6178	6.55419	6.94079	5.8011	7.2309	13.6846	37.7095	36.529	45.6375	53.6352	27.7524	68.4819	25.1396	16.5336	10.0288	8.35455	5.91796
1659	0.5	1.5	0.7	41.7675	46.7091	32.2867	21.4458	25.7328	26.1732	26.8331	27.9018	24.8776	26.1296	29.2833	27.7372	19.3336	33.385	16.6588	43.4621	34.1463	18.8869	26.315	44.93	24.2626	26.3272	26.7973	32.5722	43.9184	30.715	30.8528	25.6129	30.1389	30.8178	30.8522	30.6004	29.188	30.7989	52.3534	42.4397	25.9238	27.1758	48.97	27.8158	36.0661	44.9787	30.3895	31.8445	30.3758	47.3514
1277	0.9	7	3	3.10046	4.01228	3.44099	3.37753	32.0344	1.86911	3.2263	3.24104	4.41999	2.52694	6.33263	4.29393	3.86078	3.49515	13.9332	2.37923	7.51754	46.0146	6.78596	4.42516	4.36047	4.69732	3.36008	3.20366	4.19211	4.55419	3.44394	3.93734	7.27836	4.36294	3.21153	3.30081	3.20157	3.29134	3.57983	6.03584	5.08518	3.81673	21.2373	7.00266	7.75164	3.87105	4.30864	3.32053	3.1863	3.33122
1021	1	0.7	4	75.8204	216.699	233.405	164.407	106.687	65.95	49.3693	34.4464	25.3732	26.744	26.0628	27.8307	26.7718	23.8936	27.1161	23.684	17.9885	13.4062	10.5956	5.29884	8.7039	15.685	62.6665	25.1471	89.082	166.86	96.8678	47.5216	213.823	138.294	87.3312	54.8241	33.8715	27.1213	26.5249	27.631	28.1671	56.9052	362.055	202.791	198.291	123.671	64.5431	42.1734	34.2271	42.3626
1280	0.7	0.1	0.4	77.2629	98.0041	99.98	31.6628	17.9528	10.0912	11.5596	13.4798	125.128	83.3245	108.094	123.973	113.521	94.2583	124.722	100.779	104.46	99.1566	97.3631	93.4505	16.0629	106.113	57.5268	32.3846	30.4416	33.1741	23.56	18.664	29.2767	19.8889	16.6004	13.261	13.313	13.7179	13.2791	13.719	14.5925	13.6665	14.2725	12.2999	13.3154	13.4698	13.0182	12.6361	12.9629	13.9015
1120	1.5	0.8	4	7.88462	5.30358	5.91043	5.43643	5.72106	5.42269	5.17647	5.08792	4.93306	5.3506	5.26154	5.52192	5.31095	4.77596	5.39368	5.08896	5.31633	5.26837	5.10249	5.35319	5.14361	5.84585	5.70389	5.95789	5.78733	5.91168	6.59988	5.88633	11.869	6.50548	23.2388	16.4145	13.7704	9.67857	10.1623	8.61373	8.59126	7.25227	10.5224	10.7915	11.0939	10.0599	6.69499	5.14078	4.98059	62.5073
182	0.2	0.5	0.1	520.217	604.83	208.701	136.144	60.3437	45.0923	49.1164	46.896	45.1281	47.0274	45.0981	48.1173	55.6576	69.7372	57.2689	87.4525	48.1371	44.5312	43.6542	74.4858	96.1435	100.435	207.636	84.3436	262.495	476.703	408.012	488.086	159.073	79.7952	44.5016	49.175	48.9486	51.1137	342.907	451.801	401.184	512.573	695.356	290.288	149.093	79.0091	44.2963	50.4481	48.4543	49.7552
7311	0.4	9	6	31.7144	29.6957	26.4035	9.99805	18.186	18.6389	18.5875	18.5653	17.6359	18.3679	17.6234	18.6131	11.2226	3.30448	4.20881	3.78285	6.03566	17.1457	15.9787	13.0916	9.65835	9.11402	25.0071	11.9384	26.815	17.2379	16.3641	15.0488	40.2253	40.7953	21.4313	28.1606	18.9542	19.5432	18.6665	22.2046	24.3372	31.3356	55.344	94.2164	17.7446	26.8395	17.6847	19.809	18.8301	19.5381
1755	1.5	1	0.8	69.6819	83.6922	82.4058	40.7813	66.1973	55.9863	60.9572	58.3246	28.2181	9.00596	19.6497	22.2859	16.3002	91.3059	49.1912	75.6396	59.9168	98.7826	53.053	60.3966	56.7279	37.1343	28.4306	78.1736	85.2589	63.5269	55.6479	80.3911	67.0583	62.5706	67.8247	78.1188	82.5681	56.8502	76.3756	122.626	49.7537	59.0469	61.5734	108.614	113.527	64.0504	94.6675	86.0328	68.5154	75.6061
1152	0.1	4	0.7	0	0	0	0	0	0	0	0	0	0	0	0	0	0	0	0	0	0	0	0	0	0	0	0	0	0	0	0	0	0	0	0	0	0	0	0	0	0	0	0	0	0	0	0	0	0
1192	0.5	10	3	275.579	312.56	252.209	255.107	281.895	192.954	135.541	127.186	112.321	117.63	116.81	100.718	118.025	115.047	138.486	115.35	137.162	238.409	153.962	103.883	92.3216	101.212	103.55	118.381	130.762	175.722	155.162	141.272	113.342	106.406	74.4041	60.0533	75.9743	62.4755	84.2418	464.064	168.697	368.021	238.832	184.267	167.182	140.36	108.344	109.437	75.5411	79.7674
541	10	0.1	2	22.5197	89.8225	20.9071	29.5703	1328.59	406.078	124.001	20.7386	20.7724	91.8358	20.5697	21.188	21.0825	19.442	21.4077	807.072	286.726	146.4	45.0007	31.6176	25.4848	30.1273	26.6952	27.0681	28.6544	23.6775	26.8533	67.0574	507.638	176.746	63.165	93.0309	20.386	21.2834	20.9467	21.5234	21.5436	19.6046	22.1087	30.0277	962.49	365.394	82.0687	20.8913	19.7778	22.1417
1822	6	0.5	0.1	4890.23	4208.72	9164.53	3835.75	2510.12	1713.01	1524.48	1242.6	1071.78	1046.68	1039.43	1205.96	1323.5	4474.59	2375.42	3200.73	1503.78	1519.37	819.567	658.399	530.818	501.17	414.922	1207.81	5511.63	6473.1	4248.59	2216.18	1735.5	1435.74	1280.89	1255.56	1160.92	1093.65	1420.86	5371.2	3454.91	5212.76	3727.96	4499.88	3612.93	1747.47	1438.87	1145.86	973.983	949.719
972	1.5	6	0.1	88.6965	191.807	564.582	354.195	245.436	101.195	73.8345	59.298	18.416	33.0739	6.82995	21.0153	7.17702	6.55715	7.74401	7.356	141.946	5.38237	6.8121	6.70322	19.0641	6.28573	7.65081	8.48698	8.52237	36.6529	68.458	19.3253	36.7588	38.8833	34.9343	19.371	18.5034	6.7794	6.67021	7.28101	8.21431	12.7145	108.679	266.548	79.5532	61.9249	34.8794	32.5972	16.8065	6.46431
613	0.5	6	2	115.99	256.965	317.556	599.186	1370.56	795.81	231.3	95.7095	52.2536	95.8176	143.8	126.179	111.015	90.1309	197.396	380.334	299.344	97.6343	40.7844	40.1584	40.535	42.5134	40.1484	39.0715	51.9337	51.0447	222.887	350.123	550.33	265.875	61.2738	38.1556	40.6754	42.4316	60.339	44.6826	81.5114	106.47	396.39	483.715	525.862	424.932	231.036	38.0746	37.9504	49.4034
1086	0.5	0.2	1.5	10.0458	8.89523	7.33079	8.46869	1.88274	3.3297	3.01972	8.97375	28.2381	50.3963	7.18923	0.733927	0.709465	0.700913	0.7722	0.694292	0.0768414	0.242994	2.25944	2.82464	0.290143	3.52428	0.730145	0.730422	0.737198	0.778424	0.643522	0.669033	0.0674471	0.281874	0.376122	2.34079	2.81401	5.1492	0.944219	0.883883	1.1414	1.21293	0.743044	0.432554	0.0658563	0.233145	0.224393	0.234903	0.222209	3.76931
1295	7	0.2	0.1	23.5227	88.2824	60.5409	11.9015	15.1075	11.6909	12.8633	12.5871	13.265	14.0435	16.1751	14.6646	18.0356	12.9381	12.9035	12.9933	16.656	135.506	11.0802	12.3725	13.0053	16.0388	165.927	11.1714	15.2589	11.8253	13.602	89.7569	26.0463	36.5573	13.1457	13.0745	12.6084	15.2313	190.467	71.0543	103.299	94.426	162.925	9.34463	216.635	8.75488	12.7866	13.1652	13.0365	12.2865
1139	5	10	0.6	8.09205	12.3284	8.26505	8.17279	11.545	6.76721	7.65217	7.90544	23.075	4.23842	12.5525	8.43069	8.8446	14.9121	8.72688	9.57439	10.2737	10.2449	9.08007	9.58095	9.2617	133.248	7.27912	8.31545	13.4984	9.28137	9.74609	8.79448	42.3449	60.5488	15.3424	15.1016	9.75185	10.0614	10.2467	14.5115	45.121	9.95475	10.1589	9.86034	9.91515	9.65951	9.43945	9.63003	9.1996	17.5404
1862	4	2	0.2	790.496	499.632	1638.7	594.06	356.249	157.347	75.7272	80.9605	80.7125	106.111	133.162	96.6096	127.293	786.185	307.544	201.045	105.269	151.693	74.315	78.545	73.1303	74.5452	66.4759	126.084	780.25	1075.6	517.331	511.153	85.8776	123.433	79.455	86.4617	72.3162	94.84	263.098	846.509	426.282	777.074	626.44	656.371	264.791	146.668	100.272	80.373	81.9763	82.1147
629	3	0.3	0.1	2179.65	4337.16	3702.32	2211.53	3279.62	4622.97	2196.67	1655.22	1661.3	1881.7	1655.11	1678.49	1884.34	1412.38	1902.87	1442.87	1672.68	1656.25	1674.75	1647.59	1448.48	1676.57	1450.63	1671.04	1672.53	1397.89	1665.47	1445.81	1668.02	1445.4	1464.72	1499.87	1203.06	1465.45	1234.46	1539.9	1232.46	1419.39	1570.09	1226.21	1253.55	1241.06	1252	1532.45	1375.66	1422.22
1000	2	1.5	0.2	12.6302	58.7234	58.0678	34.8906	19.669	11.526	11.7835	11.7841	11.2767	17.7437	14.5984	46.4403	13.2145	36.0637	20.2717	16.4449	94.1278	96.7134	49.3183	16.8314	11.4888	25.9971	61.3146	50.469	86.0321	64.7858	54.5318	23.4135	37.9181	28.5397	12.3158	32.2329	9.67004	11.4979	19.8544	135.604	80.3645	15.1166	20.0528	149.069	67.4726	29.754	11.8097	11.8875	11.4394	95.2764
7306	0.1	0.1	0.1	7468.62	6265.24	15257.2	6849.31	4269.38	2533.15	2004.22	1687.77	1468.51	1600.79	1444.67	1655.31	1898.4	6056.41	4123.5	4318.09	2017.29	1959.7	1177.76	971.198	759.792	730.621	687.483	1713.85	9610.26	9057.67	6788.11	3712.43	2556.38	1988.53	1761.15	1674.96	1470.24	1361.23	1442.19	8966.14	5296.09	7307.26	5792.33	8015.88	6595.45	3005.97	2021.39	1623.92	1344.17	1224.39
991	8	0.4	2	76.6999	61.7703	165.419	41.994	83.8696	50.0224	50.2393	50.6152	47.0208	48.8903	44.8753	57.4643	108.574	166.662	23.5833	13.5365	78.8723	28.1881	45.9821	50.999	40.084	37.1171	158.776	111.086	91.4106	134.383	102.521	65.2619	109.413	172.407	74.7231	58.4824	35.0369	30.9122	25.8069	16.8656	18.212	57.1612	100.137	254.096	176.842	127.549	67.2236	43.8432	30.2874	33.0773
7317	3	3	0.3	61.218	116.256	388.217	80.4217	117.426	25.1391	31.6517	30.7397	29.6291	30.4467	29.4781	32.1807	38.0635	47.0224	27.9299	31.7447	31.2043	31.7399	31.3471	31.1392	29.6972	30.37	31.0776	53.2644	228.777	193.299	77.4349	64.2871	29.8882	31.7316	32.5913	34.1859	32.3112	31.6219	42.9848	214.332	91.1211	187.414	42.5001	226.805	250.818	53.9329	31.7984	32.8728	31.6348	32.4519
998	1	1	0.7	192.304	147.66	178.612	273.65	510.477	380.724	202.51	201.695	185.564	181.085	169.342	139.761	128.109	109.869	148.363	108.876	114.788	100.09	11.1425	30.563	23.1095	34.5337	8.64407	25.3832	34.7412	37.5898	52.5934	30.3802	14.3721	43.3861	63.1211	58.4636	82.4973	98.952	94.1931	97.0026	89.0383	58.1255	128.787	139.002	118.347	112.471	105.821	104.061	93.7257	101.31
1716	7	1.5	0.3	45.2864	44.726	157.518	77.8109	47.9615	35.2217	38.3509	36.6621	35.3071	37.0773	38.7197	50.3764	35.4893	51.0841	27.9583	38.7281	158.224	72.2664	42.8892	38.789	36.7126	38.0633	37.099	65.3182	178.223	187.369	155.831	151.857	50.5279	38.6384	38.377	36.7342	37.9013	38.4551	40.1434	358.286	178.715	153.016	111.93	236.579	214.007	176.563	128.494	39.6158	37.6671	159.908
1896	4	0.3	1	569.108	490.836	1192.54	494.064	407.603	245.227	272.417	213.727	250.542	232.248	150.289	218.37	154.534	929.159	341.159	360.175	316.943	200.507	168.969	182.746	140.675	139.352	123.491	181.835	452.81	394.275	360.781	586.174	169.191	278.824	214.119	210.626	142.287	166.326	218.513	571.198	407.821	495.239	616.41	433.781	330.115	197.439	209.457	216.129	248.982	143.742
1883	0.4	1	8	235.449	209.025	547.903	60.0947	104.26	58.6689	64.2996	43.0463	28.8242	23.0132	28.8531	36.1212	33.0765	279.655	54.2366	62.8599	64.9513	41.6568	22.9404	21.7524	10.7804	13.9699	5.63619	48.1614	286.498	325.716	137.451	107.536	67.0034	62.871	66.1026	33.8324	20.1557	20.44	18.9661	109.446	164.551	294.612	279.871	287.047	46.5858	65.2232	65.9395	54.2121	29.9808	18.5117
1285	0.6	0.7	3	40.2636	57.2814	51.9963	37.0936	37.8802	5.25919	4.34338	4.24861	4.11852	4.35837	5.1242	35.8337	5.07576	4.58127	17.3378	11.7885	7.26534	91.0898	26.9515	24.4871	7.04586	10.5296	4.56793	6.99081	4.4173	5.92652	4.49157	6.96504	20.0966	3.14984	4.34024	4.23081	4.08118	4.21894	4.27709	6.67207	27.6194	29.8693	38.1954	10.2927	15.5637	7.4668	5.67749	5.62011	5.34833	4.26846
1266	0.4	2	0.3	33.0405	14.8412	16.6809	13.021	25.8582	9.15916	8.03695	7.93894	7.58555	7.88326	7.63943	7.90954	7.89466	7.50571	9.19512	8.23733	8.35939	9.31232	8.6414	7.7993	7.52192	7.93192	8.2297	8.23709	8.12432	7.74201	8.35161	8.27331	9.44203	7.30096	7.67665	7.50095	7.21231	7.52118	7.48365	12.3563	8.28749	55.423	50.1478	33.929	47.418	12.8546	11.0079	11.0902	7.71607	7.90904
1176	1.5	0.2	0.1	61.4565	116.873	17.2609	15.4622	23.8477	14.2452	14.1822	11.5101	100.208	64.781	167.461	103.315	93.9171	91.4084	91.7216	23.4375	19.5887	28.4264	29.7632	20.72	13.1523	56.5236	13.169	16.24	14.609	19.591	11.6347	11.0723	118.988	102.974	74.8785	92.3418	46.9516	17.7669	13.4683	12.1229	44.8733	68.4824	29.7103	16.2368	22.9754	30.1668	33.1096	29.4343	12.2005	117.861
924	10	1	0.4	14.5169	24.231	42.8731	29.0645	16.235	31.2096	15.2496	18.9707	21.0999	24.0191	15.8786	40.7772	25.468	51.4702	30.2824	30.7807	21.1849	25.5603	67.0624	27.9066	43.976	28.8904	23.8969	15.842	17.4306	66.9779	43.0285	40.4985	68.024	44.0834	66.4577	43.0732	52.1141	56.0937	59.0802	53.7929	52.3995	63.9072	57.6702	50.5441	51.0159	46.2103	47.0717	46.7295	28.18	19.4145
758	8	0.4	0.1	90.3856	105.898	79.7495	47.0782	48.4177	45.0317	48.398	48.9192	48.2797	80.5963	48.0948	80.6887	49.3267	45.0081	80.1834	47.6947	49.1729	40.5808	49.2836	47.8578	46.524	51.1082	47.3043	48.8766	49.1733	43.8284	48.8514	47.4392	49.0618	51.2874	48.8929	48.1784	47.1568	83.4511	80.1401	80.2463	80.6871	44.4133	79.3149	47.2643	48.3087	47.3172	79.675	47.1985	46.211	49.322
1257	0.1	10	0.1	0	0	0	0	0	0	0	0	0	0	0	0	0	0	0	0	0	0	0	0	0	0	0	0	0	0	0	0	0	0	0	0	0	0	0	0	0	0	0	0	0	0	0	0	0	0
895	0.3	0.3	0.1	2938.84	2670.25	3020.29	3132.23	3056.37	2886.13	2874.98	2410.18	2212.44	2297.28	2226.46	2300.92	2296.46	2072.56	2289.82	2214.07	2277.24	2182.82	2248.27	2035.09	1920.72	1993.09	1933.46	2002.87	2004.25	1935.5	2098.38	2191.19	2280.55	2338.39	2226.12	2359.38	2330.08	2467.08	2434.38	2481.86	2528.67	2288.87	2742.83	3249.68	3452.83	2894.4	2818.17	2783.32	2640.81	2691.04
1317	0.3	6	0.2	16.5907	25.421	26.7172	26.4151	56.3272	13.6578	17.1191	66.4837	26.4223	24.6735	24.3213	32.2029	21.638	22.3217	24.611	24.7985	34.163	39.2896	19.6042	23.5512	24.781	37.351	18.7309	23.3128	26.0379	22.7709	25.7241	22.5129	24.2704	22.3454	210.211	11.5251	11.7745	12.8093	12.136	12.4494	8.77756	11.3918	10.973	10.0041	8.89936	11.5978	20.9193	7.43309	9.86582	13.8837
1242	1.5	10	0.5	11.4619	18.6797	18.5807	13.729	18.8127	16.8006	16.2856	6.43233	213.85	174.572	50.696	46.691	57.758	30.0755	43.4927	33.0976	14.5608	14.2164	18.9788	31.0871	24.0166	12.8338	17.2862	17.5158	20.5191	13.1867	16.0734	10.621	15.7681	9.191	1.46477	1.48012	1.49594	1.52751	1.6596	4.10984	35.8905	65.9108	18.4239	94.9091	7.66289	14.61	13.3627	1.53687	1.31687	5.54141
107	5	0.3	0.7	89.3471	103.048	137.225	26.5059	27.8618	28.7199	29.8713	29.2119	27.4581	27.5125	29.6871	54.2555	34.5095	28.9804	88.9312	23.5424	29.4256	27.3252	28.8406	28.2411	26.4153	26.7669	61.1936	260.468	225.373	208.743	142.279	91.1189	27.7897	29.2892	30.0015	29.4634	27.8248	28.1139	37.8145	120.927	204.439	228.493	273.901	19.0099	29.9905	28.6212	30.2016	29.705	28.0913	28.3131
1841	3	0.1	0.2	175.44	159.152	409.853	197.819	72.6753	44.5009	20.6525	20.6786	21.1584	10.6592	51.1475	10.1584	12.3605	136.053	129.216	16.9326	20.8149	34.0524	10.2969	10.8925	10.1867	11.2404	11.5685	95.1326	221.607	297.729	107.528	79.9436	26.9698	19.8919	20.939	10.9645	10.1699	10.958	82.9191	206.598	98.4018	121.51	102.819	114.211	102.28	48.1165	29.5556	20.5612	10.4886	10.7625
907	1	0.9	2	267.468	218.96	289.691	235.759	157.947	125.975	80.5997	79.5419	95.0667	80.0119	79.4053	68.8523	67.5038	70.2364	90.0444	102.97	82.6219	65.5053	72.1453	59.3658	69.3686	70.8347	76.5127	67.3167	57.0107	164.615	493.694	390.159	407.864	376.667	260.159	168.542	137.757	135.515	204.814	381.149	277.765	442.289	557.423	444.834	538.619	353.478	365.96	289.126	300.507	317.247
80	3	0.2	0.7	382.392	329.625	266.07	238.861	118.896	57.3086	44.2956	58.6726	63.1692	69.7437	297.887	197.184	91.4814	384.465	193.093	201.743	128.474	199.501	41.6398	53.8556	79.2014	75.2367	75.1142	603.169	383.662	526.676	351.278	347.024	106.825	127.682	43.1302	60.2197	73.3431	79.4898	130.912	451.592	475.399	543.488	527.26	97.7602	184.198	196.568	51.9763	61.6621	45.6124	71.1868
1236	0.2	0.1	2	1.14036	1.51829	1.61851	1.52486	1.73614	1.6003	25.0575	23.9477	24.4271	26.2524	24.556	17.7288	4.55008	5.04465	9.31749	8.8237	7.70712	7.26007	6.13554	4.68125	4.03881	33.3614	14.7831	11.4237	10.6306	9.92286	12.1483	10.5633	12.3473	19.2801	10.1728	9.56928	7.94473	7.44652	5.49147	5.71614	5.29997	4.95643	8.51877	9.58431	9.28573	7.58662	5.38368	4.63389	3.31446	2.21459
981	5	7	0.2	130.113	139.316	461.546	295.694	183.478	122.14	109.664	111.429	110.1	111.591	110.866	88.8745	111.636	109.769	89.0041	111.173	99.518	82.616	35.9919	19.0434	18.7259	19.3636	19.6232	20.3741	20.7224	24.2182	19.5435	15.7285	21.5317	19.1272	24.9269	42.0373	42.1227	43.0386	19.6236	43.0689	20.6664	63.7488	53.4027	118.957	18.7616	41.0647	74.5305	65.2992	64.9815	65.9241
1093	0.6	3	1.5	20.1209	27.9388	32.0642	32.0924	37.1708	26.7242	15.2992	10.8614	12.5966	11.7949	11.2953	28.0328	23.3952	58.8706	38.0949	35.5094	66.4128	88.5785	41.2034	30.6044	21.8668	22.258	22.9149	22.6566	137.23	63.6872	87.8137	86.3044	101.927	79.7184	42.5634	30.5569	21.9603	20.5555	19.1218	138.844	62.1107	75.6336	62.5225	53.2879	143.998	69.7369	59.6581	21.433	16.5418	12.5906
1709	0.4	4	0.6	71.5492	43.0825	132.661	121.162	54.6593	42.2086	52.0576	49.3612	40.2309	43.1301	48.9776	38.788	33.0203	49.76	45.5591	42.5486	55.5451	134.367	41.4098	42.0059	46.1604	54.6702	39.312	62.2652	61.0055	106.634	187.544	59.9502	54.3875	55.4153	68.3782	44.0863	41.626	44.8084	60.5626	51.7133	48.4056	49.6813	52.7111	134.941	91.1197	64.2399	48.3686	42.2091	41.9721	45.787
1017	4	1	2	23.4532	47.488	94.869	25.0702	20.7965	9.26492	10.7538	10.7544	10.3423	10.6251	11.999	9.78942	13.2728	20.2609	8.55542	8.90523	23.8886	43.3184	29.7662	7.72934	10.0411	11.1214	12.3856	15.3485	125.271	109.164	76.1505	114.387	61.5502	13.0007	10.5291	45.3171	19.9058	24.7201	66.977	235.8	77.0472	68.4152	90.1163	132.055	81.1745	70.4871	78.3983	94.1043	117.624	14.4136
1194	8	0.4	3	11.4232	13.7504	14.7617	12.7149	11.2854	9.07252	7.34661	5.74325	5.93957	10.784	9.37978	13.2512	10.9046	8.78874	11.1703	11.498	9.69112	9.70578	7.56692	7.49059	5.75168	109.588	34.2082	55.1121	28.1141	22.7967	24.9439	19.1883	75.8085	53.8196	30.3221	20.5529	15.4408	14.2229	10.7998	9.57776	9.76373	7.89396	10.5058	10.0294	11.4376	7.81827	7.54641	5.81882	5.61816	5.94205
[truncated: 434 more columns]

## Sheet: Storage(WG inflow-No Demand)
grand_id	p1	p2	p3	1980-01	1980-02	1980-03	1980-04	1980-05	1980-06	1980-07	1980-08	1980-09	1980-10	1980-11	1980-12	1981-01	1981-02	1981-03	1981-04	1981-05	1981-06	1981-07	1981-08	1981-09	1981-10	1981-11	1981-12	1982-01	1982-02	1982-03	1982-04	1982-05	1982-06	1982-07	1982-08	1982-09	1982-10	1982-11	1982-12	1983-01	1983-02	1983-03	1983-04	1983-05	1983-06	1983-07	1983-08	1983-09	1983-10
610	0.4	0.5	0.1	36700	36700	36700	36700	36700	36700	36700	36700	36700	36700	36700	36700	36700	36700	36700	36700	36700	36700	36685.7	36500.8	36235.4	35992.8	35772.6	35566.3	35372.2	35396.5	35861.2	36280.2	36187.8	35888	35548.5	35182.5	34853.7	34562.4	34310.1	34222.4	34448.8	34871.8	35760.2	36667.1	36686.6	36493.5	36198.7	36248.1	36515.8	36695.5
753	0.6	0.5	0.4	20997.3	21143.1	21229.2	21552	22462.5	23205.5	23317.6	22776.1	21997.4	21356.2	21029	20869.8	20852.5	20855.8	20841.6	20938.5	21144.4	22271.6	22707.3	22215.1	21445.8	20901.6	20672.8	20489.4	20359.3	20323.1	20360.4	21444.2	23768.9	25629.8	26707.8	26632.6	26141	25829	25785.4	25854.5	26094.1	26486.7	26747.5	27226.6	27912.1	29318.2	29851.3	29197.2	28329.2	27613
870	8	0.5	0.5	20045.2	19715.6	20020.3	19822.8	20078.5	19722.6	19890.3	19956.9	20002.4	20126.1	19803.1	19766.3	20035.4	20002.1	19677.6	19945.4	20092.6	20218.2	20214.3	20055.8	19712	19476.6	19296.5	19175.8	19050.1	18903.1	18792.5	19573.6	19914.8	19959.4	19839.2	19983	19823.6	19782.7	19978.2	19839.2	19834.1	20045.6	19825.3	19927	19908.7	19838.4	20091	19763.8	20017.7	19745.9
597	0.3	0.9	0.1	24283.2	24958.1	25070	25070	25070	25070	25049.1	24713.8	24234.1	23999.5	24046.9	24141.4	24158.7	24021.2	23722.1	23482.8	24112.4	24799.6	24546.9	23802.6	22910.8	21932.3	21261	20974.1	20696.1	20413.8	20498.1	21311.5	22827.7	24817.2	25006.9	24519.3	23914	23589	23592.4	23768.7	23970.2	24268.8	24952	25070	25070	25070	25070	25007.9	24788.2	24702
307	0.2	0.4	0.1	20981.2	20873.2	20821.4	20956	21202.7	21364.6	21404.6	21020.6	20723.8	20614.3	20624.1	20653.6	20693.4	20723.8	20851.6	21274.2	22150.4	23560	23525	23257.5	22968.2	22884.2	22967.6	23092.7	23212.3	23330.5	23556.1	23560	23560	23560	23560	23543.4	23524.3	23559.2	23560	23560	23560	23560	23560	23560	23560	23550.5	23422.4	23073	22684.9	22545.7
1753	0.6	10	0.3	1695.14	1712.56	1505.3	2121.18	1999.05	2074.32	2702.22	2927.99	2782.36	2566.61	2360.45	2323.78	2421.33	1465.44	1960.1	1819.07	2013.22	2539.45	2856.84	2429.39	1726.12	1000.34	726.407	701.258	1334.08	1896.52	1902.16	1857.54	2043.85	2187.71	2596.38	2598.54	2549.82	2339.7	1931.12	1479.84	2075.1	1712.45	2045.09	1600.09	1769.76	2242.46	2043.81	1539.65	1663.62	1519.38
297	9	0.8	0.7	2443.75	2026.73	1353.53	1026.57	2386.29	4066.01	4365.59	4053.26	3853.97	3588.16	3193.22	2846.33	2483.29	2299.22	2148.72	1935.85	2557.66	4270.1	4989.78	4839.22	4405.61	3931.29	3489.91	2934.21	2500.35	1908.09	1455.31	1111.41	1283.19	2641.56	3593.03	3410.16	3142.03	3082.26	2859.86	2453.58	2028.3	1647.59	1264.32	1080.42	1403.27	2306.19	3068	3186.82	2925.15	2617.12
1036	7	0.9	0.4	2010.21	2174.39	2408.11	2630.16	2651.99	2650.48	2565.17	2440.23	2318.11	2208.89	2105.37	2022.88	1950.24	1890.97	1870.76	1820.27	1768.31	1755.03	1717.05	1642.81	1553.03	1457.81	1427.83	1409.81	1409.6	1761.07	2009.06	1988.44	1912.23	1882.91	2028.03	2181.24	2333.53	2462.52	2586	3091.83	3284.25	3134.53	2928.39	2746.58	2784.15	2704.71	2651.14	2651.36	2650.93	2650.65
989	0.3	2	0.5	632.313	660.327	1106.63	1929.67	2167.9	2094.84	1898.17	1624.51	1329.68	1028.16	721.799	629.636	633.812	629.561	633.76	633.012	636.07	1237.06	2476.6	2524.02	2479.56	2308.13	2356.65	2504.76	2516.07	2489.87	2523.51	2516.28	2486.67	2508.5	2527.44	2513.39	2523.12	2420.71	2217.94	2412.8	2521.27	2506.4	2520.81	2488.7	2539.92	2525.55	2504.87	2403.83	2205.61	1994.69
1135	8	1.5	0.2	2548.59	2528.98	2537.29	2513.04	2484.81	2545.44	2527.76	2451.56	2358.92	2524.86	2538.29	2504.8	2553.33	2554.03	2536.28	2544.66	2529.08	2542.76	2550.65	2532.45	2516.97	2579.71	2753.02	2545.3	2534.86	2533.67	2542.96	2542.75	2540.33	2960.18	2978.13	2618.9	2544.63	2542.21	2543.71	2540.82	2540.37	2535.24	2546.34	2541.08	2538.36	2544.33	2546.33	2538.91	2530.07	2508.74
1269	0.8	0.1	0.1	4392.46	4588.51	4649.09	4749.23	4998.82	4983.73	4623.52	4390.32	4391.8	4386.98	4391.81	4386.85	4389.67	4386.27	4387.02	4388.2	4385.64	4384.66	4392.27	4386.08	4389.26	4392.1	4388.94	4388.7	4387.41	4385.09	4390.04	4384.73	4393.56	4390.94	4392.21	4390.46	4392.56	4387.72	4385.66	4560.77	5299.34	5572.49	6051.85	6104.48	5887.01	5743.61	5423.16	4986.73	4516.08	4387.8
1077	5	0.3	0.1	2553.93	2531.75	2609.35	2632.85	2789.69	3214.35	3181.62	3095.16	2976.6	2866.15	2737.72	2607.47	2495.57	2358.73	2266.26	2219.99	2145.65	2082.33	2033.04	1935.57	1883.82	1921.85	2368.34	2664.52	2736.33	3205.55	3229.52	3242.64	3149.13	3234.81	3243.56	3228.94	3266.9	3256.97	3211.84	3228.41	3184.39	3138.82	3243.62	3221.66	3207.74	3239.83	3257.85	3272.36	3214.07	2951.47
1026	0.4	0.2	0.1	2918.68	3039.96	3161.75	3275.51	3237.94	3125.66	3016.1	2947.39	2891.02	2832.64	2786.09	2851.7	2882.13	2945.53	2987.18	2982.3	2987.95	3079.2	3103.94	3011.13	2982.75	2974.27	3110.65	3090.73	3062.62	3658.93	3968.76	3887.61	3723.52	3545.79	3401.52	3226.16	3094.47	2978.68	2936.67	4027.45	4254.35	4261.82	4197.37	4204	4270.12	4233.86	4104.95	3931.44	3746.07	3586.02
740	1.5	3	1	1825.89	1822.47	1802.19	1742.27	1643.83	1562.51	1506.16	1505.77	1583.99	1605.74	1636.71	1659.15	1661.92	1658.84	1639.23	1615.49	1572.52	1611.94	1630.6	1605.46	1622.38	1690.65	1691.65	1702.86	1719.5	1721.86	1693.6	1670.63	1644.04	1626.11	1622.27	1617.97	1604.69	1703.9	1714.14	1704.31	1690.81	1685.58	1691.62	1665.25	1607.42	1585.27	1576.83	1548.73	1625.52	1690.56
1294	1.5	1.5	0.1	1585.75	1585.57	1587.76	1576.32	1548.7	1536.21	1538.3	1530.26	1514.27	1537.37	1558.22	1577.81	1581.89	1582.81	1580.45	1583.86	1583.97	1623.2	1651.88	1584.09	1584.66	1583.04	1584.25	1584.6	1583.55	1584.1	1583.83	1585.06	1582.69	1584.7	1584.09	1583.84	1584.26	1584.05	1583.76	1583.39	1582.8	1577.74	1582.41	1585.45	1583.63	1584.54	1584.71	1583.57	1584.97	1583.18
1848	1.5	0.7	1.5	1011.41	934.307	990.589	1245.44	1215.87	1026.79	814.64	601.423	410.66	360.174	336.422	370.331	357.59	355.824	360.948	370.204	368.184	359.504	369.101	368.305	365.84	358.561	350.357	346.876	351.899	448.474	451.572	432.956	424.444	369.033	367.992	364.364	358.588	356.248	346.638	624.694	1036.13	1095	1091.73	1037.29	1124.39	1173.96	998.813	787.583	579.832	393.377
1869	0.8	2	1.5	329.097	477.099	777.42	1510.59	1495.5	1152.96	830.698	517.114	330.06	316.555	311.024	316.124	328.368	318.493	325.331	330.715	329.777	329.183	326.01	313.837	297.365	275.313	250.979	227.012	241.695	336.774	331.41	399.629	530.654	379.019	331.644	326.619	319.159	312.827	300.452	783.059	1639.53	1841.42	1814.36	1715.34	1652.84	1546.6	1180.2	856.919	540.905	329.118
1863	0.6	0.5	0.1	2635.99	2805.45	3024.4	3147.57	3119.85	3082.17	3015.08	2921.78	2821.97	2735.04	2653.79	2595.88	2527.39	2552.84	2597.25	2556.16	2483.81	2400.84	2307.55	2211.41	2132.37	2054.55	1985.49	1892.67	2041.24	2350.01	2501.36	2498.82	2504.17	2444.07	2363.63	2281.74	2196.88	2126.27	2058.64	2148.81	2312.16	2452.63	2556.8	2719.93	2728.95	2680.25	2603.16	2511.13	2425.85	2340
1770	8	1	0.6	821.146	962.18	1176.6	1366.62	1339.23	1258.3	1199.89	1135.73	1068.87	1000.67	931.454	850.858	771.999	785.647	891.348	914.947	921.715	901.958	883.512	836.485	783.077	724.8	658.171	604.686	765.852	1053.95	1252.12	1298.58	1245.21	1200.95	1143.13	1081.29	1020.27	953.256	878.087	893.242	1044.05	1138.14	1206.19	1226.95	1252.56	1255.81	1223.62	1164.37	1102.07	1038.29
965	0.7	4	1	273.492	280.829	319.292	611.376	720.382	727.088	686.503	604.094	498.466	402.662	299.196	274.589	276.78	272.142	275.274	276.77	275.21	277.925	275.579	273.858	276.522	277.009	273.644	273.408	273.854	279.417	399.102	532.074	623.881	861.134	933.9	922.569	871.067	805.35	732.381	651.224	563.285	515.538	541.464	925.71	1078.83	1100.71	1102.92	1056.26	970.753	869.561
1247	2	2	0.5	1026.78	993.452	965.754	926.554	885.199	863.093	821.355	758.656	691.065	927.775	967.1	1025.37	1029.43	1028.25	1026.25	1027.8	1029.64	1026.26	1011.06	995.975	981.794	1126.19	1336.96	1163.78	1030.38	1027.63	1028.84	1029.23	1027.47	1057.21	1039.77	1029.52	1029.01	1028.9	1031.23	1029.92	1027.7	1027.3	1028.61	1029	1028.6	1028.12	1024.35	1000.25	967.701	932.088
7313	0.3	0.1	0.1	2304.25	2339.88	2476.86	2529.9	2529.9	2529.9	2513.34	2359.87	2161.22	2131.66	2194.11	2264.3	2338.73	2379.26	2521.64	2529.9	2529.9	2529.9	2504.78	2316.22	2066.47	1852.25	1830.83	1903.75	2030.21	2134.01	2514.62	2529.9	2529.9	2529.9	2526.5	2434.8	2282.36	2296.66	2410.75	2514.09	2529.9	2529.9	2529.9	2529.9	2529.9	2529.9	2527.99	2439.45	2298.42	2259.45
1287	7	0.1	0.8	1563.21	1611.13	1644.84	1620.68	1638.02	1656.74	1619.87	1671.87	1589.04	1567.02	1659.96	1638.19	1657.11	1655.1	1581.61	1675.58	1611.52	1534.93	1656.27	1646.44	1630.81	1563.89	1655.53	1641.73	1656.81	1609.58	1641.47	1651.02	1565.29	1658.97	1640.36	1656.55	1646.35	1639.83	1622.27	1595.79	1647.7	1557.95	1630.64	1654.16	1637.98	1655.31	1635.02	1639.22	1622	1629.89
1186	0.7	0.6	3	810.527	611.074	489.252	255.873	224.127	234.349	242.14	244.143	238.948	233.487	226.943	220.693	212.183	204.403	198.346	196.061	202.067	224.268	242.075	243.237	238.574	239.8	240.762	240.489	241.354	177.146	195.182	219.608	237.95	241.423	235.202	228.316	213.478	198.553	185.088	175.312	241.725	191.547	230.375	231.307	239.836	240.997	241.058	235.892	225.663	211.42
1042	0.6	0.2	0.1	1591.82	1623.19	1663.99	1704.15	1710.13	1703.36	1685.8	1664.94	1643.16	1626.47	1613.86	1600.06	1586.19	1580.15	1582.47	1582.4	1581.85	1595.07	1590.84	1576.02	1559.06	1544.63	1538.68	1533.92	1549.37	1718.31	1788.49	1759.87	1718.93	1701.54	1693.41	1676.29	1659.81	1644.34	1636.11	1910.5	2030.49	2017.42	1988.1	1981.77	2019.95	2006.91	1965.4	1910.23	1855.15	1806.76
884	7	0.1	0.3	1188.15	1224.07	1226.11	1228.84	1223.6	1221.85	1216.9	1276.95	1215.89	1230.49	1250.93	1205.56	1223.58	1232.55	1238.57	1268.56	1189	1223.27	1250.34	1259.17	1180.76	1217.79	1236.12	1242.93	1243.19	1239.68	1235.01	1221.17	1241.1	1230.36	1224.67	1211.68	1264.39	1179.67	1246.95	1215.46	1196.78	1226.74	1258.42	1186.98	1244.96	1194.04	1205.59	1242.36	1189.47	1231.35
1273	1	8	0.1	887.152	905.355	917.559	904.511	902.57	897.327	890.306	876.925	839.524	819.892	815.694	848.5	875.851	893.639	904.071	918.048	918.599	887.954	870.229	872.562	872.707	901.906	918.867	915.158	912.673	912.282	895.553	892.453	912.476	917.912	916.07	916.357	915.433	919.757	911.939	917.403	902.725	907.303	897.077	916.355	916.16	914.16	914.91	914.767	911.93	909.567
961	0.1	1	0.4	0	0	0	0	0	0	0	0	0	0	0	0	0	0	0	0	0	0	0	0	0	0	0	0	0	0	0	0	0	0	0	0	0	0	0	0	25.8411	67.7821	114.24	255.772	334.007	373.747	387.292	388.351	385.815	383.026
1144	0.3	10	2	155.555	169.182	170.79	166.201	164.354	171.688	180.58	180.607	146.421	140.326	174.944	143.368	160.603	162.219	165.119	167.438	160.417	156.209	178.812	170.176	168.724	131.826	177.995	175.71	158.289	146.186	178.669	170.795	131.402	171.012	181.427	171.28	164.655	164.588	162.624	165.887	198.205	154.065	172.088	172.096	159.175	179.259	167.016	170.264	168.89	167.689
616	10	0.3	0.1	1245.89	1059.44	1229.35	1238.12	1118.15	1210.41	1276.08	1189.35	1242.82	1166.94	1230.76	1166.71	1242.29	1142.34	1219.04	1183.64	1198.59	1234.92	1167.23	1253.55	1183.21	1183.04	1249.88	1130.2	1216	1210.21	1150.66	1222.6	1222.43	1154.44	1198.5	1243.67	1206.91	1198.28	1207.26	1204.64	1200.22	1193	1213.64	1211.82	1225.2	1245.81	1250.21	1215.92	1192.48	1200.6
911	8	0.9	2	163.664	195.183	190.105	193.304	197.365	187.008	195.746	193.792	190.714	194.433	191.691	197.567	188.287	169.258	124.498	160.416	183.045	179.956	174.317	180.35	170.426	146.441	117.301	119.84	143.313	128.74	199.441	195.849	187.011	198.936	193.004	197.249	191.95	190.272	185.03	183.299	197.535	172.39	425.053	1257.39	1397.21	1357.46	1283.28	1200.45	964.111	339.416
1006	0.9	1.5	0.3	675.947	697.499	742.307	786.818	795.271	789.232	770.791	748.053	727.328	708.356	693.079	681.068	669.283	661.348	670.875	669.048	678.908	745.852	798.712	804.11	797.951	792.454	821.462	818.192	813.561	836.854	828.651	823.162	816.788	805.029	802.628	792.073	786.409	780.67	773.073	826.465	823.548	811.022	815.356	821.885	871.371	833.003	818.166	804.445	789.166	797.636
1048	9	0.8	0.3	807.414	805.009	870.917	1251.74	1253.89	1287.6	1288.49	1034.42	819.027	808.936	808.983	808.386	808.357	807.903	808.163	809.473	806.715	792.266	764.711	681.176	583.826	488.333	477.111	631.906	686.41	817.111	847.004	810.314	814.613	1206.13	1216.31	1021.16	818.129	808.401	809.669	807.141	808.569	801.359	806.381	1049.44	1140.93	1222.29	1211.82	1004.38	818.086	806.24
1123	0.5	8	0.3	720.836	698.117	661.495	675.327	690.038	699.073	690.451	674.715	661.598	729.609	752.898	537.501	476.605	495.347	522.781	537.587	553.369	624.264	654.37	656.123	650.489	643.494	640.125	642.233	646.652	743.288	779.756	767.286	737.568	768.733	769.43	772.797	765.661	756.644	748.335	583.687	653.596	676.51	726.069	762.808	623.796	681.321	693.128	688.182	676.757	665.914
1032	9	0.8	0.2	668.951	731.961	763.699	814.943	780.873	762.506	763.471	762.195	752.115	732.784	707.371	677.389	641.169	602.759	574.961	561.078	552.12	597.883	635.4	630.922	608.503	581.252	657.858	760.019	759.575	766.823	763.177	763.052	766.416	998.448	1022.94	868.312	763.244	762.953	762.479	757.472	762.652	772.66	797.321	962.269	1066.22	1083.95	967.572	802.111	762.753	761.868
1774	0.7	1.5	0.3	734.294	755.042	865.2	1023.95	852.673	749.328	748.938	749.714	744.87	741.862	727.997	708.281	682.577	701.154	747.827	746.956	748.958	747.147	751.049	745.238	732.563	702.158	662.648	621.641	678.577	972.969	1194.37	1124.8	818.877	747.75	748.738	747.762	745.3	742.744	744.799	743.014	747.733	764.802	769.263	753.786	749.07	750.2	748.48	748.939	747.367	739.055
1781	4	9	0.5	306.834	614.566	595.503	690.753	649.244	574.743	514.112	391.618	244.282	186.147	184.917	184.502	183.941	318.01	658.197	590.661	632.973	589.853	520.634	366.114	211.148	185.478	185.975	182.891	279.873	631.042	659.379	667.251	514.407	521.883	448.389	319.88	226.682	185.421	181.701	366.138	651.016	518.341	628.955	666.59	690.542	654.17	629.289	511.67	360.471	213.925
355	10	0.1	0.2	1170.96	1156.53	1177.6	1125.81	1174.51	1184.97	1143.18	1035.23	976.827	944.456	995.293	1152.55	1174.58	1153.69	1131.84	1150.78	1151.07	1189.04	1156.82	1060.57	986.364	953.027	934.806	999.129	1114.4	1167.62	1170.18	1164.89	1154.29	1170.74	1145.2	1051.04	984.656	957.693	1030.11	1150.34	1163.68	1136.71	1167.25	1134.61	1154.95	1186.59	1188.97	1115.31	1091.19	1155.02
1101	0.5	0.7	4	83.2277	137.291	104.521	170.805	163.443	162.139	149.828	128.226	98.7469	61.0368	16.6107	58.6977	98.7831	150.304	154.37	97.8683	135.272	147.816	157.699	147.233	122.865	91.4682	53.1577	14.0543	7.09873	108.415	148.056	136.616	163.748	160.482	151.862	129.286	98.7321	64.2645	22.7157	104.764	261.52	165.071	161.841	130.711	150.313	165.879	163.481	151.702	126.359	92.5596
1023	1	10	0.1	570.559	570.345	588.046	592.513	597.703	605.42	613.673	606.224	603.799	603.368	611.754	599.081	609.454	601.996	596.797	607.217	604.896	604.775	605.035	595.387	633.688	643.576	503.074	520.295	570.813	512.825	465.785	571.122	592.779	543.887	547.065	619.389	584.739	607.141	609.996	603.549	597.037	615.634	547.968	546.025	612.877	604.682	604.809	601.996	607.148	607.625
1060	0.5	4	0.3	357.315	370.253	408.2	462.712	464.749	455.225	436.462	412.329	389.016	369.194	346.371	345.296	348.071	343.625	374.375	388.926	406.873	452.022	461.902	456.819	453.569	443.509	502.435	526.823	537.548	509.471	560.437	561.13	549.144	547.139	554.105	537.071	515.368	493.642	476.273	577.426	598.086	600.475	602.425	574.818	553.338	594.183	588.192	570.256	550.055	531.025
1864	1	1.5	1	163.276	233.364	429.995	762.801	722.975	568.379	441.871	311.572	187.486	146.987	144.885	146.493	147.217	145.903	147.298	147.181	147.436	146.924	147.268	147.353	147.027	142.424	136.333	131.337	141.451	167.783	201.794	223.387	292.109	239.177	159.813	145.216	146.834	146.087	146.196	543.784	967.413	1029.02	1088.85	1172.84	1317.36	1389.66	1233.4	1028.45	757.219	519.956
1797	5	0.2	0.1	663.46	736.705	724.596	819.771	793.857	766.353	806.675	778.428	772.782	737.745	776.767	777.829	774.017	658.901	781.039	742.431	824.041	772.746	790.068	809.794	740.625	637.087	569.155	597.549	569.666	712.427	768.771	790.718	784.507	752.626	793.014	799.761	785.013	766.956	744.323	670.387	794.197	723.887	757.94	750.522	786.477	781.277	783.419	770.164	821.407	748.846
305	5	0.4	0.8	616.913	349.758	176.026	277.746	629.355	743.279	766.608	915.434	731.844	183.61	150.993	307.086	766.867	594.525	573.635	548.811	681.673	734.365	795.636	832.211	720.347	797.085	674.594	645.547	755.479	383.277	766.036	705.529	746.544	747.014	762.508	922.225	845.676	435.299	349.119	381.645	652.498	635.431	688.379	483.384	399.517	387.358	513.184	768.905	848.146	691.476
968	10	8	0.1	550.506	553.972	536.385	543.379	556.608	556.75	555.662	553.756	553.088	553.533	553.141	554.811	552.549	553.667	553.921	553.737	528.191	543.155	553.917	552.744	553.598	553.434	553.39	554.301	553.41	553.133	549.278	554.84	543.716	555.172	555.669	554.845	554.591	553.095	553.319	554.241	554.184	549.934	545.792	549.784	550.331	551.383	557.259	553.658	553.266	554.046
1019	1	6	1.5	131.964	134.657	145.294	158.542	148.377	139.181	139.153	139.065	138.094	136.632	135.078	133.433	130.917	131.931	138.137	139.089	135.341	141.625	140.032	139.166	139.136	139.092	139.227	138.774	137.217	169.298	228.716	231.006	205.479	171.994	142.421	139.355	139.553	139.376	138.913	209.267	296.459	282.907	264.177	272.132	336.119	327.896	293.464	252.86	211.117	168.505
1302	4	3	0.3	555.001	555.25	554.583	553.536	549.767	546.811	540.005	513.142	502.053	516.58	529.402	551.691	554.237	554.085	553.472	553.961	554.819	570.218	569.601	554.59	554.608	553.519	554.601	554.849	553.24	554.178	555.881	555.34	552.409	550.422	540.674	530.359	523.791	519.364	516.649	514.905	517.137	529.547	548.308	555.767	553.389	547.919	544.974	541.264	537.562	534.822
1824	6	0.8	0.1	404.583	451.416	305.815	438.113	506.438	471.782	463.73	457.356	470.993	460.872	447.596	465.365	448.3	451.04	507.179	435.792	477.902	441.414	471.773	458.419	461.645	460.532	466.592	388.986	359.493	371.61	460.906	598.708	469.165	460.572	465.723	459.563	460.836	462.03	448.233	348.055	474.166	418.217	563.094	433.672	440.522	601.609	476.225	455.522	462.149	461.706
1316	1.5	0.1	0.2	0	0	0	0	0	0	0	0	0	0	0	0	8.16058	20.9076	41.1845	70.7342	134.349	196.07	262.557	259.707	256.367	251.629	257.709	254.948	247.981	239.809	232.01	222.952	210.665	191.664	178.323	166.983	157.907	148.333	141.32	133.749	128.286	124.999	122.314	119.12	115.873	114.011	112.201	109.128	105.088	102.154
1835	1.5	0.1	0.2	652.268	757.162	988.182	958.034	765.337	780.842	766.328	761.505	774.63	727.018	748.302	766.605	750.448	667.196	770.845	764.634	782.472	753.837	792.143	749.015	810.691	843.237	669.077	741.213	659.176	800.149	767.949	788.432	775.315	771.785	769.367	759.56	771.288	780.745	749.674	653.138	784.087	756.665	771.989	749.068	745.033	787.917	781.854	768.208	780.505	756.99
1847	2	0.1	0.2	662.592	744.477	699.582	782.443	748.821	755.944	737.636	743.64	752.32	722.296	732.756	742.311	740.053	612.447	760.558	727.274	765.867	739.142	769.986	741.968	746.133	856.033	639.674	693.527	608.158	697.994	752.866	763.573	750.434	740.118	744.215	729.96	721.868	740.115	725.564	652.674	758.294	735.072	749.564	710.325	746.467	762.063	750.516	742.207	738	745.914
1231	5	3	0.3	440.239	509.714	510.656	509.896	510.333	510.718	505.257	492.921	477.547	460.681	443.332	426.801	410.274	394.634	379.273	363.764	352.804	485.019	511.874	511.968	513.516	510.573	506.624	510.614	510.34	509.526	510.482	510.035	510.457	510.13	510.841	506.417	495.104	480.647	466.849	486.518	511.004	502.293	509.393	510.939	509.497	510.961	510.775	512.13	506.618	496.191
1140	0.9	5	0.8	424.839	415.372	412.321	401.659	391.849	385.629	380.728	376.3	372.775	367.744	362.792	353.074	349.112	344.518	338.572	335.642	328.537	322.838	317.598	313.884	311.543	305.191	297.515	294.606	287.383	273.61	272.119	252.022	240.001	237.409	240.728	238.869	236.524	235.689	233.932	217.828	209.089	217.476	220.166	219.115	216.715	212.085	207.732	203.938	201.574	245.304
1296	10	0.5	2	419.809	382.191	356.707	319.09	278.758	243.7	207.694	166.983	131.021	126.085	126.128	125.279	124.717	122.574	124.969	126.149	125.951	123.011	126.578	126.122	125.945	125.712	116.537	126.13	125.705	125.575	125.084	125.618	126.239	126.349	126.256	126.056	125.995	126.358	125.349	119.084	125.858	129.391	142.586	148.936	138.712	139.941	126.544	126.116	126.176	126.05
1659	0.5	1.5	0.7	203.378	188.344	218.817	253.067	257.689	251.248	237.83	222.142	206.197	187.841	167.345	143.069	127.053	136.644	148.976	143.852	164.975	189.032	187.715	179.837	194.701	197.115	188.306	176.616	170.526	230.131	388.658	451.348	459.812	456.137	445.175	427.859	408.071	387.111	361.938	383.019	408.983	419.2	427.653	466.058	498.293	504.604	499.653	485.229	466.538	449.316
1277	0.9	7	3	112.764	112.382	112.335	111.762	104.69	101.176	100.465	98.6508	96.9959	95.7406	93.8641	97.1843	101.151	106.137	115.016	120.888	124.336	121.066	124.657	124.468	124.63	124.094	123.561	122.359	120.574	118.995	118.772	119.122	122.381	124.375	124.074	122.905	121.094	119.047	117.158	114.91	114.702	121.01	121.671	124.593	124.108	124.524	124.293	123.204	121.717	120.133
1021	1	0.7	4	84.4628	112.021	114.266	118.459	117.395	117.299	117.273	117.444	116.448	110.702	98.9481	84.6483	66.3993	47.7024	30.1314	11.0688	0.177423	0.217411	0.374924	0.0341156	0.376211	0.0426891	46.8066	95.0759	108.486	110.587	117.278	117.923	111.34	117.251	117.696	117.791	116.845	117.522	113.927	106.55	93.921	84.4688	98.5135	184.202	137.462	116.791	117.825	116.879	117.954	115.365
1280	0.7	0.1	0.4	1117.54	1022.31	920.446	840.469	817.58	796.039	751.044	702.513	810.427	1147.52	1142.94	1144.09	1160.19	1162.56	1169.99	1168.59	1127.25	1066.08	981.987	885.183	845.848	849.599	854.962	846.033	846.068	846.075	846.366	845.519	845.363	843.531	843.469	831.921	820.531	813.428	809.723	808.091	806.86	817.914	832.471	843.485	838.614	829.887	810.102	784.209	758.895	740.35
1120	1.5	0.8	4	97.2401	97.7451	98.0117	98.9759	101.489	103.674	103.623	102.581	100.796	99.0203	96.73	94.8216	91.7818	88.6498	86.2494	83.2952	81.1122	79.437	76.5213	73.8323	70.8007	68.0799	64.7635	60.6686	56.4086	53.4365	50.4558	48.4498	60.4337	104.86	114.47	114.459	114.353	114.455	114.487	114.337	114.534	114.469	114.201	114.29	114.483	114.377	114.454	114.635	114.32	121.164
182	0.2	0.5	0.1	1018.65	1102.7	1102.7	1102.7	1101.53	1074.96	1024.96	984.588	955.933	927.846	899.439	873.393	845.937	872.111	979.241	1102.21	1092.28	1035.91	859.629	759.436	677.29	594.667	541.054	758.507	1102.32	1102.7	1102.7	1102.7	1102.67	1102.62	1094.14	1067.48	1049.02	1035.93	1059.53	1102.7	1102.7	1102.69	1102.68	1102.7	1102.7	1102.64	1090.09	1063.75	1049.88	1036.89
7311	0.4	9	6	15.4055	11.7488	30.7597	68.4477	74.8749	72.0421	66.5015	58.9796	49.5524	38.6825	26.7091	13.9117	1.79614	0	0	0	0	0.00326462	0.0176089	0.013073	0	0.00190868	0.116123	5.79993	5.30101	15.5183	30.7175	36.7385	44.3419	91.7537	102.552	98.2615	93.8689	89.2227	82.926	74.6942	65.8468	75.8396	96.1418	61.1955	91.7594	99.7046	100.697	97.2007	91.4426	84.1086
1755	1.5	1	0.8	97.5662	115.043	178.393	253.191	248.614	218.895	182.092	139.578	103.228	99.5984	98.371	92.9698	92.4027	145.792	184.425	177.141	167.853	212.119	219.924	180.881	138.995	102.647	96.7177	103.473	200.9	318.541	377.471	378.115	365.719	337.383	294.445	245.761	223.994	200.551	152.462	114.842	166.612	221.683	224.901	235.757	388.35	516.234	477.492	411.173	355.1	301.312
1152	0.1	4	0.7	0	0	0	0	0	0	0	0	0	0	0	0	0	0	0	0	0	0	0	0	0	0	0	0	0	0	0	0	0	0	0	0	0	0	0	0	0	0	0	0	0	0	0	0	0	0
1192	0.5	10	3	74.7223	74.0495	82.9919	82.0235	81.6695	83.771	83.3839	82.0392	82.4034	81.7388	82.6372	81.6025	81.6661	80.5887	82.111	82.762	80.4731	78.6917	83.8779	83.3025	82.5222	80.7415	82.1964	82.4139	81.8291	80.2153	83.2693	82.4462	81.6838	82.5372	82.6354	87.1545	76.3152	81.8727	85.0004	61.1666	80.7109	65.0757	83.8627	83.1864	81.9583	83.0834	83.4087	82.6086	82.4369	83.2887
541	10	0.1	2	640.458	578.46	583.399	584.665	429.097	621.063	622.563	600.007	625.051	607.619	596.446	611.898	620.51	622.937	621.557	403.16	137.784	139.961	87.5831	87.3246	84.2235	77.8222	70.7621	63.0421	54.9482	45.5827	34.8161	26.705	271.563	619.483	618.325	619.586	595.87	615.449	630.029	639.402	642.791	641.605	637.084	631.044	569.821	621.107	623.763	598.498	619.215	632.48
1822	6	0.5	0.1	301.571	282.798	241.864	328.172	363.96	502.625	353.75	330.104	331.279	330.141	328.475	328.035	329.395	283.34	356.102	322.295	427.621	328.397	335.346	334.425	332.689	332.222	331.93	315.752	312.995	245.299	308.268	332.473	403.772	330.582	330.946	329.63	330.448	330.503	323.461	301.148	299.986	282.372	303.988	301.16	309.437	366.955	343.217	331.515	330.963	329.977
972	1.5	6	0.1	350.312	353.388	352.582	469.629	377.042	356.359	356.578	356.434	356.819	356.639	354.29	360.346	350.442	351.482	351.082	350.299	317.594	307.05	337.972	356.46	353.448	353.524	352.757	351.375	350.58	349.157	339.565	348.728	355.7	354.945	356.433	356.79	355.338	355.671	355.73	354.238	351.589	352.677	346.868	351.818	357.021	355.795	356.476	355.372	357.967	354.566
613	0.5	6	2	82.0483	76.7298	80.0233	106.103	309.043	327.464	246.31	82.6518	81.413	79.3679	80.1162	81.3664	81.8924	81.3733	77.0758	78.7173	82.7397	84.1202	82.2332	73.8082	59.5944	44.8645	31.633	19.5227	5.85045	5.69704	61.6156	78.6506	112.79	170.383	89.0843	82.1045	68.0518	52.3584	39.2996	57.825	80.1659	76.2336	77.7932	81.7682	146.202	319.822	193.999	85.3542	84.8487	74.6708
1086	0.5	0.2	1.5	263.701	253.404	244.248	234.848	227.019	218.674	206.218	191.109	162.999	110.66	89.4538	87.3305	86.3879	85.4366	84.7344	83.8821	82.8196	81.5785	78.6902	76.1729	73.98	70.7432	69.4724	68.742	68.0374	67.4638	67.0045	66.347	65.5191	64.5324	63.4324	61.806	58.7519	52.7967	51.0332	50.7704	50.9397	58.2962	70.0803	81.717	82.8881	81.7382	80.4144	79.2944	77.9978	74.5613
1295	7	0.2	0.1	581.921	584.414	594.286	576.36	591.908	601.897	597.243	588.775	579.628	574.209	567.979	565.321	566.405	581.284	589.007	588.367	593.492	532.891	547.81	549.839	552.8	552.673	498.074	496.413	513.061	531.753	553.874	562.683	586.665	604.103	598.089	598.874	594.031	592.915	549.948	579.376	594.898	580.574	582.618	576.505	547.55	483.164	493.682	501.168	507.25	509.512
1139	5	10	0.6	267.478	261.332	257.003	249.427	241.246	232.672	222.11	211.567	203.72	229.009	236.683	261.444	266.939	264.709	292.347	298.507	299.285	300.476	296.013	288.321	281.288	258.168	263.02	267.326	266.968	271.675	279.042	281.585	306.653	331.906	336.325	333.738	332.191	330.594	327.764	326.788	333.079	310.748	317.958	322.405	322.346	320.086	313.127	303.404	293.594	286.376
1862	4	2	0.2	285.46	319.062	383.751	468.73	312.311	315.818	313.31	322.727	309.185	294.899	307.818	314.618	301.493	281.116	315.345	308.525	312.194	306.386	314.267	290.799	256.699	213.237	167.005	115.487	231.385	371.314	386.551	300.218	307.212	317.987	306.751	302.606	288.648	262.856	260.592	297.73	330.548	297.821	315.574	317.734	315.649	318.541	316.888	320.146	309.189	288.147
629	3	0.3	0.1	429.882	398.919	457.4	445.803	409.959	440.876	468.701	452.835	444.581	435.704	438.674	442.555	440.053	445.54	443.398	444.543	437.302	440.977	438.168	444.704	440.447	440.153	444.69	430.325	433.22	443.807	432.458	448.241	435.01	440.038	436.908	424.595	444.632	441.184	433.838	427.205	453.513	429.639	424.623	437.424	440.764	448.101	432.15	417.2	447.483	446.998
1000	2	1.5	0.2	293.869	306.528	318.679	318.393	319.413	319.326	317.121	311.448	304.736	297.831	296.432	292.333	294.024	304.157	317.511	317.803	313.614	333.262	328.015	319.055	320.02	318.126	311.568	318.219	316.067	331.591	327.375	318.011	318.173	317.279	319.698	316.539	309.719	308.802	306.714	361.756	342.352	317.819	317.465	335.873	344.08	319.729	318.965	317.003	313.592	314.224
7306	0.1	0.1	0.1	789.7	789.7	789.7	789.7	789.7	789.7	789.7	789.7	789.7	789.7	789.7	789.7	789.7	789.7	789.7	789.7	789.7	789.7	789.7	789.7	789.322	755.481	675.066	775.232	789.7	789.7	789.7	789.7	789.7	789.7	789.7	789.7	789.7	789.7	789.7	789.7	789.7	789.7	789.7	789.7	789.7	789.7	789.7	789.7	789.7	789.7
991	8	0.4	2	317.349	354.77	453.319	502.262	519.65	515.011	499.818	474.305	444.317	411.861	378.385	340.219	294.219	127.982	69.2451	70.9412	56.3712	63.9298	73.1182	71.9029	73.4141	71.9055	73.5133	75.7538	73.3201	71.3795	74.3374	74.497	72.1531	73.3601	75.0155	74.1457	74.5816	74.3914	73.8853	75.198	75.6567	67.4348	70.842	127.53	134.498	79.541	74.5145	74.4337	74.2163	73.8637
7317	3	3	0.3	220.587	276.148	295.427	295.935	270.425	244.917	246.581	239.374	228.463	215.302	200.406	185.008	167.982	204.685	247.898	269.593	275.257	272.741	263.178	249.085	232.727	213.787	195.607	179.292	272.596	295.731	286.026	290.326	292.245	291.393	283.497	275.103	264.272	252.066	238.359	250.959	293.414	257.22	287.578	275.981	287.154	294.268	293.418	290.386	282.662	272.318
998	1	1	0.7	297.253	323.547	311.693	420.043	678.501	742.98	623.708	451.216	355.692	325.467	306.944	295.506	295.312	292.94	291.541	295.024	263.541	158.039	72.9393	54.6218	33.5192	8.5113	44.3791	71.062	73.344	73.1941	73.2286	73.5032	73.7428	68.5854	72.3799	73.0842	73.0592	73.2732	75.2602	76.3947	74.5736	73.0585	81.2085	185.069	288.655	273.713	194.791	99.9488	71.9119	82.6178
1716	7	1.5	0.3	177.992	215.88	283.822	297.926	293.204	285.096	272.5	252.453	230.397	208.36	187.873	168.467	160.832	203.466	241.396	240.234	259.483	298.878	290.664	280.933	267.065	248.761	231.385	214.158	256.699	362.756	417.456	332.207	290.199	294.362	289.168	271.156	253.962	236.007	216.216	317.849	406.954	317.781	279.928	297.753	453.322	437.3	325.203	286.467	272.588	273.5
1896	4	0.3	1	463.575	481.371	470.547	494.272	478.956	493.32	483.748	489.284	484.79	476.821	473.365	483.88	498.863	277.261	262.964	211.263	110.356	68.7828	68.7198	67.8213	68.8692	68.0858	69.1108	66.7844	80.1573	337.274	491.673	459.092	478.995	479.359	485.126	485.247	482.275	498.774	488.084	452.869	493.186	473.942	470.326	488.892	484.881	493.338	483.839	472.201	472.342	473.966
1883	0.4	1	8	18.3701	42.3976	39.0452	51.6999	58.5838	41.6403	26.2467	2.53856	0.00729765	0	0	0	0	11.9084	58.3288	55.0757	30.7876	3.44684	0.00125702	0.00790683	0	0.0109974	0	0.0047866	25.4523	37.4059	27.4504	35.7338	59.6601	41.432	17.7429	0.37038	0	0	0	1.66824	28.3112	20.9727	33.5218	47.2831	49.9141	54.7023	35.8767	7.71122	0.0603041	0
1285	0.6	0.7	3	208.697	161.857	111.18	67.5776	63.5063	68.3757	68.6191	68.7032	68.5008	68.3271	67.424	51.4516	51.4532	60.6405	67.7815	67.4868	68.0086	83.9083	98.2655	72.665	68.5003	68.3306	67.6127	68.37	68.5233	67.8733	68.1594	68.1793	63.8002	66.6223	68.5575	68.716	68.1257	67.0448	65.9733	64.3177	64.1779	61.7734	68.198	68.7662	67.7804	68.3919	68.6273	68.5627	68.5747	67.859
1266	0.4	2	0.3	271.944	270.586	273.841	273.507	272.344	274.424	274.414	273.368	271.471	269.986	267.785	265.515	261.446	257.702	253.457	248.366	245.31	243.843	241.606	238.447	238.401	237.916	237.308	235.682	234.196	233.288	232.667	233.233	236.604	239.454	240.01	238.318	235.229	232.459	230.933	244.87	258.954	279.13	293.926	280.121	274.421	274.53	273.887	273.624	273.447	273.053
1176	1.5	0.2	0.1	636.719	543.026	475.49	461.494	444.415	437.418	444.124	459.473	478.651	640.487	614.79	669.187	631.717	553.011	486.418	478.747	478.688	478.266	478.581	478.736	478.295	476.895	479.09	475.781	474.243	478.559	478.299	477.962	479.545	505.842	544.971	515.291	480.822	478.857	478.3	477.9	476.192	478.482	478.681	478.735	478.55	477.881	478.357	478.587	478.788	478.396
924	10	1	0.4	271.706	267.47	269.548	272.943	268.921	267.324	264.728	256.397	258.023	254.175	253.101	266.788	272.487	272.165	275.788	269.953	270.161	267.455	283.435	325.548	300.456	272.023	264.39	263.363	260.052	270.89	347.54	388.844	387.973	402.976	407.864	410.856	391.062	366.135	346.405	365.758	362.956	358.32	363.772	414.516	408.905	381.717	345.991	304.504	272.199	261.55
758	8	0.4	0.1	458.14	459.643	456.284	458.303	460.385	455.678	447.03	445.945	461.668	458.383	455.917	460.604	453.998	466.217	466.598	454.229	458.234	460.623	449.817	426.07	413.853	426.917	426.931	428.9	436.54	441.162	444.91	452.156	445.103	438.807	445.184	447.491	447.492	455.852	457.585	458.61	456.073	463.662	455.597	463.962	459.521	459.75	436.988	423.569	421.023	437.388
1257	0.1	10	0.1	0	0	0	0	0	0	0	0	0	0	0	0	0	0	0	0	0	0	0	0	0	0	0	0	0	0	0	0	0	0	0	0	0	0	0	0	0	0	0	0	0	0	0	0	0	0
895	0.3	0.3	0.1	666.1	666.1	666.1	666.1	666.1	666.1	666.1	666.1	666.1	666.1	666.1	666.1	666.1	666.1	666.1	666.1	666.1	666.1	666.1	666.1	666.1	666.1	666.1	666.1	666.1	666.1	666.1	666.1	666.1	666.1	666.1	666.1	666.1	666.1	666.1	666.1	666.1	666.1	666.1	666.1	666.1	666.1	666.1	666.1	666.1	666.1
1317	0.3	6	0.2	619.522	600.027	571.796	541.852	516.487	520.95	498.781	591.455	653.896	649.516	638.13	628.442	621.148	607.543	588.587	563.777	542.915	558.739	592.738	584.856	576.484	567.929	585.212	577.328	561.146	546.222	533.754	516.995	500.879	478.868	358.907	247.071	234.971	225.426	221.104	214.718	208.245	202.586	194.38	183.786	171.627	160.715	151.473	142.353	135.035	130.735
1242	1.5	10	0.5	251.207	239.767	224.475	208.969	188.021	156.101	108.938	65.2797	73.4915	250.912	249.891	249.3	248.646	249.817	248.527	248.463	242.086	221.111	182.77	143.805	146.625	156.61	152.16	146.25	139.468	134.305	127.123	116.695	101.715	71.8442	62.3059	60.3393	58.0024	56.5677	54.7105	57.0964	132.33	239.987	253.909	215.751	186.143	158.757	99.0661	62.3457	59.6178	58.8218
107	5	0.3	0.7	386.526	414.392	395.551	412.127	425.665	418.908	400.137	375.106	350.951	328.651	307.067	293.498	317.575	373.553	415.531	403.415	402.237	389.582	367.194	339.578	313.665	291.611	272.565	386.445	412.613	410.694	422.254	413.182	418.846	418.149	406.12	386.877	367.05	348.343	328.124	372.53	405.38	402.243	417.627	389.532	420.146	424.443	413.76	395.546	376.073	356.529
1841	3	0.1	0.2	384.3	398.849	432.631	429.435	401.131	403.081	403.623	402.912	400.715	403.799	399.901	370.474	373.507	382.141	397.039	398.02	403.156	402.995	402.326	402.762	401.062	396.423	391.328	389.729	365.776	414.345	404.737	400.309	402.434	403.738	402.082	405.379	406.563	404.746	398.714	380.818	403.559	395.888	394.051	400.837	401.364	403.87	403.108	402.713	404.371	407.122
907	1	0.9	2	39.027	49.0759	44.0866	49.6823	49.8101	49.4928	50.8533	49.0064	47.9143	48.9651	49.1705	48.7406	49.9111	48.307	48.9037	46.0325	50.0028	49.3815	49.5001	48.3578	48.954	49.0177	47.4646	49.1656	49.0626	39.9626	50.7389	72.1745	47.8503	51.6961	49.3643	50.1926	49.1263	49.2558	46.0642	46.2864	48.8409	47.1676	87.1715	449.701	568.9	550.305	475.062	369.504	252.432	59.9486
80	3	0.2	0.7	367.598	357.574	353.08	366.342	366.599	361.903	358.754	320.141	274.663	236.263	102.029	183.542	372.817	352.367	349.905	351.542	361.644	333.234	332.942	301.757	258.567	244.726	297.955	360.666	348.744	364.093	372.364	370.746	376.412	343.12	327.127	299.991	264.628	265.027	332.124	372.935	372.631	364.431	367.094	376.866	350.614	292.894	314.448	308.766	277.119	246.417
1236	0.2	0.1	2	228.647	228.911	228.909	228.386	227.387	221.222	195.245	155.949	126.061	100.046	75.9795	53.2623	52.6663	52.9497	52.8297	52.9752	52.9758	52.9524	52.9726	52.9981	53.0329	52.9211	55.3366	52.9705	52.9752	52.9742	52.936	52.9845	52.9589	52.7803	53.011	52.9523	52.955	53.0007	53.0256	52.9659	52.9652	52.9135	52.8924	52.8674	52.9026	52.9666	52.9957	53.0137	53.0395	53.1252
981	5	7	0.2	199.261	198.728	194.1	195.724	203.323	203.221	201.729	202.005	201.462	202.317	201.865	201.788	200.751	201.747	201.3	201.066	202.002	203.637	195.782	195.8	190.488	183.858	177.069	171.086	166.03	166.227	178.143	188.157	189.448	192.079	200.83	200.857	201.465	205.127	198.776	201.516	204.921	199.896	198.298	153.359	181.067	201.113	200.684	201.806	201.867	201.822
1093	0.6	3	1.5	51.0087	50.2848	50.9337	50.917	50.6624	51.0618	51.3103	50.9365	50.5676	48.6284	50.4597	49.9612	50.8692	47.8154	50.6768	50.9034	48.8278	51.7996	51.3494	50.9364	51.1585	50.8532	50.7234	50.8518	51.3667	100.185	122.268	90.641	50.4955	54.8899	51.6548	51.1592	51.1155	51.0075	50.8401	53.0295	78.4874	51.4111	51.0601	50.3343	83.6672	99.5226	56.3719	51.0921	51.3061	50.8273
1709	0.4	4	0.6	68.3928	116.576	184.353	188.876	192.02	191.114	180.848	164.791	144.98	118.682	87.9009	57.1542	48.1717	60.8667	100.782	136.25	162.897	167.954	173.118	162.214	140.479	115.158	91.0249	74.6942	96.7317	178.97	194.771	196.467	190.835	192.553	180.902	171.253	152.036	124.697	93.0142	74.3044	76.1068	97.0979	144.574	176.669	178.685	181.977	179.659	165.228	141.379	111.775
1017	4	1	2	10.553	25.9444	45.8828	47.6627	47.9441	49.0061	47.9576	44.373	39.3797	33.1185	25.9731	17.2132	9.44059	2.86811	11.2844	15.0509	21.8858	47.0722	47.6572	41.9642	40.8416	36.0811	30.3068	24.8896	21.4886	75.3505	154.704	117.229	59.5949	48.7493	49.5961	43.5887	41.8809	40.9395	41.5719	262.861	347.442	316.75	280.71	280.358	347.716	326.535	271.286	207.261	103.397	48.8035
1194	8	0.4	3	49.5577	49.2423	49.4798	49.5033	49.619	49.407	49.4111	49.2823	48.5506	49.0867	49.4589	49.384	49.5385	49.6232	49.2983	49.4872	49.458	49.4175	49.4843	49.4832	48.9431	56.0587	82.3236	61.3045	49.3517	48.9649	49.515	49.6384	54.0634	57.7869	49.8317	49.5923	49.5713	49.4732	49.4584	49.5288	49.5593	49.3655	49.394	49.3424	49.5227	49.3249	49.5492	49.669	49.1862	47.8565
[truncated: 434 more columns]

## Sheet: Outflow(WG inflow-With Demand)
grand_id	p1	p2	p3	1980-01	1980-02	1980-03	1980-04	1980-05	1980-06	1980-07	1980-08	1980-09	1980-10	1980-11	1980-12	1981-01	1981-02	1981-03	1981-04	1981-05	1981-06	1981-07	1981-08	1981-09	1981-10	1981-11	1981-12	1982-01	1982-02	1982-03	1982-04	1982-05	1982-06	1982-07	1982-08	1982-09	1982-10	1982-11	1982-12	1983-01	1983-02	1983-03	1983-04	1983-05	1983-06	1983-07	1983-08	1983-09	1983-10
610	0.4	0.5	0.1	1420.38	4583.12	3663.81	2124	3935.16	4905.39	2052.37	1500.26	1484.12	1556.25	1510.86	1555.91	1541.14	1378.83	1864.78	1614.59	1428.37	1316.6	1186.8	1119.24	1101.78	1136.93	1096.67	1130.92	1154.19	1165.2	1135.79	1055.27	1170.26	1161.85	1159.07	1124.99	1082.79	1117.62	1078.29	1236.51	1102.68	1068.89	1220.27	1677.29	1155.93	1148.79	1259.08	1189.89	1091.74	1322.77
1294	1.5	1.5	0.1	30.777	23.0107	36.0593	24.5523	117.303	17.5166	22.4703	13.8383	49.8056	24.747	84.4661	72.2252	93.3336	79.577	271.642	200.779	175.043	462.41	283.338	185.841	153.13	201.546	187.365	163.39	160.162	147.848	142.085	85.0588	104.192	71.1296	67.8821	67.4847	55.7867	57.3537	57.9555	76.5358	94.6931	173.279	217.67	104.45	110.602	83.6717	64.4973	66.0433	54.9573	46.1303
1247	0.5	10	0.5	110.61	91.6894	74.445	80.8979	115.987	59.8943	66.5842	76.2994	175.754	72.5165	124.553	127.667	127.819	78.1729	192.759	85.0758	81.9861	93.1223	97.6833	91.9857	88.695	914.264	206.557	150.214	162.425	147.216	195.362	83.6551	597.018	246.182	205.661	141.569	86.3931	90.3413	88.6075	97.762	172.578	96.4668	148.04	132.981	89.3102	95.2277	83.2355	89.8697	86.8986	90.8076
1186	1	1.5	3	236.714	173.192	137.984	144.498	101.629	57.7336	34.2734	34.5626	27.1753	32.2722	30.9214	31.8137	30.1633	28.5359	34.1872	29.7557	47.052	134.412	52.8439	36.4117	28.0422	41.7953	47.4016	38.6794	48.0131	157.061	23.8896	27.9533	39.6202	35.5855	26.2811	27.1846	26.3361	31.3196	34.2925	336.01	45.5342	313.382	172.769	25.0553	59.492	44.0078	34.5515	26.4159	26.5674	30.0828
355	10	0.1	0.3	156.387	209.632	40.0221	638.179	681.278	227.778	32.2719	40.2458	33.3966	58.4281	54.8108	149.412	142.702	186.665	400.224	313.656	1182.35	177.515	34.2048	40.4765	37.0408	33.2306	59.1225	45.1548	35.1253	152.778	422.412	161.186	704.437	273.062	30.5114	41.1522	34.5072	52.5627	56.835	274.256	203.572	372.118	406.845	787.439	1462.07	538.786	124.277	40.4918	53.7529	173.936
1302	10	3	0.3	22.0951	14.1074	16.1871	12.9945	19.9767	6.71059	15.3955	42.6549	23.7442	16.352	21.5453	19.3146	49.8612	20.5662	72.9196	42.987	36.156	232.598	54.5793	24.5621	19.8282	28.6448	21.5569	23.3564	16.2988	16.1092	14.2844	14.0524	21.1901	8.75665	23.6802	17.3228	16.3683	16.3714	16.8269	18.3542	18.7944	19.8833	46.3183	13.1571	17.0422	15.0379	17.0133	16.621	16.0626	16.5736
1231	0.6	3	0.3	161.923	71.9788	64.6465	47.0949	47.3555	35.4115	27.6173	27.266	26.9132	29.8538	28.9827	29.781	28.7918	26.1583	30.0256	28.2959	44.5643	119.564	57.1679	33.8537	27.9091	53.7289	74.9952	50.8042	56.268	60.4472	53.3641	45.2273	42.635	45.7772	28.2869	27.3828	26.7426	29.7234	35.1644	236.989	74.7606	182.438	78.4242	59.0886	57.0457	45.5095	36.6675	28.1928	27.3076	29.1181
1140	6	1	0.8	9.46191	5.66345	1.23536	14.8507	9.85337	4.05183	4.6964	3.58186	6.5256	2.05405	13.3366	5.61945	5.59891	2.93966	7.70979	3.71195	8.26959	6.09446	4.52336	3.28191	1.23248	13.3155	0.924182	4.29988	13.444	6.63002	0.801303	25.1946	16.2388	5.45572	0.952357	3.20847	1.02187	0.687106	9.50709	13.1543	13.5681	4.06542	2.69864	1.64421	4.39334	5.07864	4.53156	3.33568	0.90915	17.7363
1296	10	0.5	2	118.034	36.4455	51.9196	48.2936	63.7192	38.1778	44.539	46.7944	17.7494	5.80366	4.42176	5.00531	5.45062	12.0223	5.72708	6.84536	7.36117	62.8618	12.2455	8.71973	6.92042	39.8856	22.9789	10.3976	14.6039	10.475	10.759	13.2937	43.1293	13.1801	6.71571	5.93779	7.14199	7.24662	7.10908	43.7816	36.2945	45.6578	53.673	27.7894	68.5167	25.1729	16.5533	9.9839	7.10473	7.24801
1277	0.7	6	2	29.931	28.8942	24.9626	24.0453	39.2019	13.9464	23.0513	10.8382	3.00833	1.73542	4.27055	15.6477	2.60719	8.00718	21.3	10.2555	8.07645	31.9588	14.8141	8.29489	4.43603	4.66222	2.23831	2.13604	2.7971	3.04069	5.97046	2.62923	10.5714	4.8691	2.1669	2.2137	2.13687	2.19815	2.39224	4.03271	11.7648	5.10272	21.125	6.06093	7.46232	4.5833	2.87171	2.98226	2.12992	2.22387
1280	0.7	0.1	0.4	76.4035	97.3388	99.3671	34.1981	18.0926	10.7761	12.415	13.9937	125.087	82.313	107.163	123.052	112.63	93.4873	123.898	100.485	107.244	102.298	103.707	87.9136	15.9643	105.626	59.3016	29.3714	30.3128	36.2484	23.9268	15.8535	28.9071	24.326	13.1574	13.5025	13.2089	13.6118	13.1776	13.615	14.4892	13.5724	14.169	12.3394	13.5183	13.7632	13.5102	12.8048	12.8631	13.8012
182	0.3	0.8	0.1	308.308	512.865	208.701	136.144	72.9121	68.131	73.2386	68.7844	64.2331	65.9242	110.068	167.609	153.804	150.724	171.626	110.382	79.9499	15.2932	16.3597	15.9152	15.5381	17.2027	139.216	164.538	62.3409	476.703	408.012	488.086	159.073	79.7952	65.5373	73.6385	71.1718	73.0852	253.228	451.801	401.613	512.145	695.356	290.288	149.093	86.4651	67.4789	75.0883	70.0766	70.7373
1152	0.1	4	0.7	0	0	0	0	0	0	0	0	0	0	0	0	0	0	0	0	0	0	0	0	0	0	0	0	0	0	0	0	0	0	0	0	0	0	0	0	0	0	0	0	0	0	0	0	0	0
1295	7	0.2	0.1	23.7841	78.174	65.375	12.2017	15.4793	12.8635	14.2661	13.8728	13.805	14.3113	16.418	14.9115	18.2403	13.128	13.1155	13.2027	17.0161	125.493	11.9832	13.4193	13.3636	16.3242	71.8038	12.3796	89.3703	12.2305	14.0569	129.519	13.2282	28.3593	14.1571	14.0917	13.3255	15.5052	190.969	71.5758	94.6135	103.898	155.088	9.58322	217.297	9.23571	13.4015	13.6487	13.3184	12.4928
629	2	0.1	0.5	1610.35	4331.57	3936.57	2053.14	3401.25	4522.36	2221.16	1649.47	1687.17	1825.57	1683.83	1693.43	1700.93	1610.51	1754.28	1586.65	1651.24	1677.12	1579.39	1662.96	1552.95	1559.85	1555.65	1568.22	1716.82	1444.28	1576.02	1586.59	1456.57	1490.66	1568.17	1419.7	1237	1414.17	1271.8	1516.85	1382.34	1183.9	1631.78	1209.26	1283.52	1177.11	1305.1	1585.73	1239	1543.45
1266	0.4	2	0.3	90.2127	61.3592	54.2499	50.312	23.8333	10.111	7.88743	7.74966	7.34914	7.6328	7.40093	7.66714	7.67077	7.30834	8.98425	8.04638	8.17927	9.14566	8.4977	7.66046	7.33809	7.74109	8.04691	8.05111	7.96303	7.59804	8.19446	8.12314	9.30143	7.20535	7.57747	7.39392	7.07895	7.36902	7.33864	12.1962	8.12185	60.2059	48.6394	35.236	47.7931	12.3917	10.629	10.8514	8.93695	7.69254
1176	1	0.1	0.1	5.69904	7.37996	4.58038	7.67067	11.9156	7.18674	7.20418	15.8677	80.5831	51.8709	172.78	133.917	63.9259	63.664	80.2304	64.4376	59.4178	27.4567	29.6668	20.3561	11.8123	58.7356	15.1167	9.68332	19.4539	16.9585	14.2523	8.95772	91.9206	70.8478	53.9815	66.8765	59.9945	58.3947	57.083	20.3133	38.4913	66.1269	39.6029	15.9586	21.0782	32.7058	34.052	26.5973	12.7031	84.4043
758	10	10	0.5	90.7982	77.5694	113.391	47.9068	49.6314	46.1638	50.6414	83.2056	49.2205	51.3782	81.2888	51.258	82.7393	45.6347	50.7086	80.8429	50.0865	40.0768	51.4287	49.7614	48.5732	53.8091	49.2911	50.8332	51.1092	45.3709	50.6362	49.2801	51.2183	54.6939	83.8164	49.5237	48.6227	85.9721	82.6387	82.4904	83.0362	45.4615	81.5865	48.397	49.6113	80.2465	50.6212	49.6639	48.6425	52.1287
1242	1.5	8	0.5	10.5614	17.9172	17.8059	13.0443	18.8387	18.4174	18.0095	6.2543	214.587	172.174	48.4114	49.2614	57.078	35.4148	36.6622	28.3363	14.9104	16.355	21.4003	32.0575	24.4301	12.4457	16.7901	17.0333	20.0704	12.8052	15.6828	10.2842	15.8511	10.1089	1.54133	1.55039	1.52853	1.50684	1.64029	4.08904	35.4225	62.5509	21.3708	79.3284	8.1679	16.4895	15.3351	3.9188	1.34993	5.62466
1236	0.5	0.5	2	7.54636	7.79387	8.25083	7.7824	8.77766	8.53542	25.7927	25.2338	24.4036	26.1023	24.4602	17.7048	5.19823	5.72645	8.45332	9.58274	7.73591	7.33309	6.26931	4.74275	3.39649	33.9102	14.6732	11.3835	10.5789	9.84941	12.8359	10.4991	12.2376	18.9277	10.3934	9.7154	7.94814	7.41303	6.1314	5.03302	5.27518	5.69283	7.7135	9.58086	9.29947	7.65744	5.4875	4.69676	2.68824	2.82963
1194	0.6	6	0.5	26.2075	24.6235	23.6601	22.5245	23.1148	42.0164	141.335	14.2541	13.8095	18.282	13.0124	15.3069	12.9286	11.7047	14.6888	12.9603	13.0708	12.877	12.7006	12.3208	11.7416	63.4358	19.5898	29.2797	34.8118	14.2918	24.3793	18.5499	101.099	39.488	17.2555	19.2068	13.6228	13.9903	13.5686	14.2699	14.311	13.4398	14.785	13.9216	13.7205	13.4294	13.2065	12.8123	12.047	12.4359
[truncated: 434 more columns]

## Sheet: Storage(WG inflow-With Demand)
grand_id	p1	p2	p3	1980-01	1980-02	1980-03	1980-04	1980-05	1980-06	1980-07	1980-08	1980-09	1980-10	1980-11	1980-12	1981-01	1981-02	1981-03	1981-04	1981-05	1981-06	1981-07	1981-08	1981-09	1981-10	1981-11	1981-12	1982-01	1982-02	1982-03	1982-04	1982-05	1982-06	1982-07	1982-08	1982-09	1982-10	1982-11	1982-12	1983-01	1983-02	1983-03	1983-04	1983-05	1983-06	1983-07	1983-08	1983-09	1983-10
610	0.4	0.5	0.1	36181.1	36700	36700	36700	36700	36700	36700	36700	36700	36700	36700	36700	36700	36700	36700	36700	36700	36700	36681.6	36490.5	36238.2	36012.3	35808.5	35618.1	35440	35478.4	35952.8	36361.5	36230.2	35878.3	35498.7	35125.1	34810.1	34535.5	34299.6	34227.9	34470.4	34907.7	35805.8	36676	36676.7	36434.4	36098.9	36141.3	36424.4	36670.6
1294	1.5	1.5	0.1	1585.89	1586.88	1587.1	1580.07	1552.92	1540.37	1542.4	1534.28	1518.24	1541.31	1562.13	1578.71	1582.55	1583.81	1580.56	1583.88	1583.9	1622.99	1651.3	1583.81	1583.9	1583.9	1583.06	1584.59	1583.85	1583.99	1583.8	1584.74	1582.46	1584.57	1583.95	1583.97	1583.58	1583.78	1584.19	1583.03	1582.19	1577.81	1583.38	1585.64	1583.55	1584.42	1584.53	1583.34	1584.71	1583.56
1247	0.5	10	0.5	801.742	760.026	738.604	705.831	670.859	654.921	619.057	562.995	502.395	744.467	788.873	955.21	1002.14	992.632	991.149	1005.9	1022.05	1019.04	1003.87	988.635	974.549	980.054	1018.14	1003.14	1001.4	1004.45	1004.92	1013.09	875.262	982.938	1010.13	1004.57	1013.46	1027.99	1032.57	1031.52	965.968	994.968	1006.94	1006.94	1009.96	1019.73	1020.04	995.947	963.626	928.372
1186	1	1.5	3	225.428	249.952	237.221	209.976	241.448	241.683	242.436	237.635	231.875	226.575	220.165	214.034	205.641	197.974	192.038	189.893	196.045	218.421	241.806	240.644	243.902	240.902	237.64	241.37	240.53	178.42	197.38	221.786	238.642	241.606	236.964	230.052	215.197	200.261	186.789	177.014	242.556	189.87	229.486	230.126	241.026	240.833	240.737	235.398	225.203	210.99
355	10	0.1	0.3	1171.02	1178.76	1140.12	1143.14	1170.05	1183.48	1156.28	1059.22	1003.17	971.308	1022.91	1160.25	1175.51	1168.87	1172.76	1139.12	1153.01	1194.41	1181.57	1092.68	1024.08	991.797	974.463	1039.81	1156.27	1173.04	1155.44	1125.51	1162.33	1172.94	1174.7	1086.06	1023.52	996.913	1070.37	1173.85	1159.15	1135.71	1173.33	1149.19	1158.33	1180.85	1146.56	1057.76	1041.25	1144.03
1302	10	3	0.3	554.513	551.718	551.163	550.179	546.416	543.124	535.446	507.633	496.179	510.733	523.676	548.821	548.723	551.972	552.65	554.472	553.639	556.995	563.547	554.22	554.471	553.893	553.206	555.032	553.285	554.361	556.051	555.461	552.433	550.067	539.659	528.731	521.834	517.342	514.641	512.92	515.168	527.589	549.112	555.427	555.149	554.026	550.639	546.451	542.437	539.588
1231	0.6	3	0.3	499.091	505.498	511.023	510.808	510.212	508.548	500.204	487.605	472.316	455.538	438.27	421.817	405.369	389.806	374.515	359.019	348.065	482.252	511.439	510.725	511.088	509.948	507.884	510.813	509.66	509.667	510.758	510.029	510.2	510.439	506.652	502.148	490.914	476.533	462.806	483.993	510.702	502.134	509.325	510.837	509.965	510.936	510.025	510.756	505.259	494.855
1140	6	1	0.8	423.328	413.794	410.678	399.973	390.149	384.043	379.443	375.288	371.848	366.779	361.766	351.987	347.966	343.315	337.315	334.331	327.188	321.516	316.446	312.922	310.65	304.285	296.562	293.603	286.33	272.511	270.977	250.838	238.779	236.172	239.58	237.87	235.605	234.769	232.977	216.835	208.061	216.414	219.07	217.986	215.556	210.937	206.677	203.024	200.755	244.494
1296	10	0.5	2	408.531	371.206	346.022	308.721	268.712	233.985	198.322	157.956	127.722	126.075	125.793	125.85	125.283	123.132	125.408	126.062	126.182	123.549	126.531	126.047	126.232	125.547	116.367	126.243	125.659	125.499	125.841	125.589	125.468	126.303	126.15	126.118	126.085	125.763	125.865	120.09	125.796	129.433	142.595	148.908	138.648	139.844	126.534	126.134	126.278	126.099
1277	0.7	6	2	273.954	243.981	224.673	199.652	178.889	167.265	146.6	126.476	123.915	123.848	123.019	118.786	120.893	123.181	123.5	124.789	124.566	130.227	135.73	124.924	124.57	124.725	124.24	124.16	123.529	123.415	123.858	122.372	124.003	124.698	124.604	124.5	123.758	122.784	121.996	121.369	122.587	121.7	123.523	124.64	124.565	124.646	124.75	124.56	123.959	123.461
1280	0.7	0.1	0.4	1121.34	1026.87	925.626	843.957	820.38	798.387	752.591	703.365	811.038	1148.68	1145.07	1147.14	1164.15	1167.35	1175.57	1174.72	1132.06	1067.91	978.975	878.806	845.586	849.474	855.234	846.168	846.086	845.953	846.038	846.226	845.985	844.308	844.028	832.061	820.607	813.602	809.992	808.459	807.328	818.476	833.127	844.166	839.165	830.184	810.001	783.787	758.432	739.959
182	0.3	0.8	0.1	798.653	1057.54	1102.69	1102.65	1096.87	1050.54	976.695	913.496	864.455	817.463	758.889	625.185	489.423	436.61	452.622	491.513	449.008	419.413	387.136	368.894	365.802	365.663	403.654	604.84	1028.42	1102.7	1102.69	1102.7	1102.61	1100.68	1083.47	1033.94	992.107	956.833	981.454	1102.68	1102.67	1102.67	1102.64	1102.7	1102.7	1101.14	1070.56	1020.5	983.364	948.993
1152	0.1	4	0.7	0	0	0	0	0	0	0	0	0	0	0	0	0	0	0	0	0	0	0	0	0	0	0	0	0	0	0	0	0	0	0	0	0	0	0	0	0	0	0	0	0	0	0	0	0	0
1295	7	0.2	0.1	575.018	586.985	593.473	574.455	589.672	598.881	592.948	583.156	573.13	567.329	560.854	557.956	558.822	573.512	581.044	580.21	585.069	554.421	548.672	549.718	551.991	551.546	571.026	588.52	599.177	548.823	570.487	563.34	567.438	603.686	595.278	595.059	589.366	587.774	544.449	573.439	595.952	581.991	583.468	577.145	547.787	482.779	492.751	499.697	505.408	507.434
629	2	0.1	0.5	190.559	479.244	494.549	474.538	452.01	461.147	500.358	488.376	490.734	487.351	488.396	491.602	490.444	485.704	472.646	470.762	471.805	475.477	492.311	493.809	494.712	494.122	495.841	504.017	492.647	478.758	481.146	483.662	469.434	476.233	483.467	486.577	492.716	486.235	484.802	489.167	489.446	488.978	480.625	475.071	467.404	471.586	496.714	481.723	492.893	488.632
1266	0.4	2	0.3	421.689	363.79	329.492	289.635	273.453	274.559	274.642	273.764	272.078	270.834	268.875	266.843	263.005	259.468	255.422	250.523	247.638	246.328	244.223	241.18	241.277	240.964	240.533	239.087	237.77	237.007	236.526	237.229	240.72	243.655	244.271	242.643	239.642	236.992	235.602	249.683	263.926	278.342	294.978	282.015	274.409	274.621	274.179	274.335	274.178	273.093
1176	1	0.1	0.1	470.216	464.246	457.946	450.371	443.174	446.048	459.777	477.97	491.73	679.748	669.366	683.834	657.144	609.468	571.435	538.769	496.847	478.947	479.116	479.228	479.341	477.469	479.486	479.24	478.261	478.794	478.963	479.28	490.108	547.504	616.079	610.477	586.806	552.039	509.623	479.739	478.504	488.827	482.206	479.346	479.05	478.988	479.093	479.193	479.459	489.06
758	10	10	0.5	251.733	254.102	256.417	249.175	256.84	258.8	256.846	252.925	248.645	259.772	249.662	257.018	257.344	248.726	257.098	251.321	247.391	257.063	253.382	235.408	227.282	240.465	238.827	239.045	244.937	248.343	251.99	260.587	257.497	254.676	252.769	243.224	247.881	253.5	251.414	253.766	252.208	257.86	251.399	259.865	260.172	255.546	248.78	243.867	245.104	261.143
1242	1.5	8	0.5	251.495	240.88	226.336	211.519	190.826	157.962	108.993	65.1899	76.1057	262.152	251.128	250.818	250.328	250.452	250.944	251.281	250.01	227.589	186.755	146.037	148.144	158.093	154.059	148.603	142.244	137.442	130.579	120.422	105.453	73.7346	62.2344	60.1986	57.817	56.383	54.5501	56.9591	132.275	241.743	254.301	225.621	201.649	172.566	110.288	63.7247	60.0088	59.1621
1236	0.5	0.5	2	268.041	261.939	255.394	248.417	240.951	227.468	198.502	157.527	127.056	101.131	77.1849	54.5285	52.9925	52.9812	52.8683	52.9511	52.9689	52.9413	52.9601	52.9857	53.023	52.922	55.3347	52.9778	52.9697	52.952	52.9569	52.9785	52.9524	52.7404	52.9978	52.9389	52.9542	52.9939	52.988	52.9676	52.9765	52.9457	52.8861	52.9183	52.9237	52.9576	52.9822	53.0133	53.0365	53.0632
1194	0.6	6	0.5	418.739	405.308	396.123	386.226	374.764	358.543	237.613	185.832	173.892	164.243	159.757	156.273	154.172	151.225	147.505	144.555	141.921	138.229	131.689	123.116	115.302	146.161	197.702	199.19	198.852	193.459	199.304	199.518	181.903	188.642	197.335	198.999	199.512	198.917	196.689	192.929	187.723	182.356	177.295	172.734	168.394	163.205	155.944	147.5	138.985	130.621
[truncated: 434 more columns]

## Sheet: Outflow(OBS inflow-No Demand)
grand_id	p1	p2	p3	1980-01	1980-02	1980-03	1980-04	1980-05	1980-06	1980-07	1980-08	1980-09	1980-10	1980-11	1980-12	1981-01	1981-02	1981-03	1981-04	1981-05	1981-06	1981-07	1981-08	1981-09	1981-10	1981-11	1981-12	1982-01	1982-02	1982-03	1982-04	1982-05	1982-06	1982-07	1982-08	1982-09	1982-10	1982-11	1982-12	1983-01	1983-02	1983-03	1983-04	1983-05	1983-06	1983-07	1983-08	1983-09	1983-10
753	0.6	0.5	0.1	1441.54	1268.84	1475.56	1334.96	1435.84	1702.84	1411.47	1510.17	1605.29	1612.74	1419.85	1556.62	1681.41	1353.22	1392.9	1124.68	1681.14	1752.57	1349.74	1489.73	1574.92	1662.99	1601.39	1484.09	1669.54	1625.12	1724.77	1552.22	1649.4	1902.05	1650.71	1507	1666.15	1856.15	1553.89	1807.57	1779.47	1759.73	1652.45	1513.63	1889.61	1959.43	1706.55	1511.61	1569.02	1867.07
870	0.6	0.5	0.1	1852.14	1735.41	1788.72	1569.3	1713.29	1812.03	1628.98	1654.79	1478.61	1783.41	1701.78	1649.98	1959.32	1647.75	1644.61	1577.94	1861.31	1891.6	1835.63	1641.69	1644.4	1635.35	1561.92	1473.19	1776.5	1740.22	1871.35	1637.28	2250.99	1591.44	1924.45	1854.39	1781.55	2045.28	2045.7	1757.67	1864.23	1986.7	2004.22	1760.06	1858.7	1912.67	1907.52	2070.37	1745.6	1661.43
597	0.3	0.4	0.3	687.486	655.889	628.077	759.87	2314.98	3413.77	929.986	617.112	726.99	644.13	669.326	662.033	624.067	593.106	629.763	655.151	691.604	678	571.578	596.903	675.708	651.435	563.883	598.244	629.354	638.16	613.026	680.249	738.526	653.002	546.168	669.708	627.507	679.09	636.801	658.912	687.868	609.885	816.419	1181.38	3185.93	6450.97	4016.89	1399.35	612.332	776.489
307	0.5	0.3	0.3	330.778	314.198	373.966	329.921	374.647	690.84	462.208	532.825	536.535	428.223	383.366	351.424	372.879	415.618	470.651	322.681	758.011	576.965	471.288	541.98	565.085	610.802	596.743	558.241	631.062	628.291	595.521	527.439	689.267	676.763	517.98	546.754	587.54	622.416	571.178	628.93	606.226	581.611	587.936	564.776	687.812	557.761	633.987	531.668	536.862	622.524
1753	0.4	7	0.4	6528.47	3381.71	13356.7	5459.97	5463.8	2416.26	3403.89	1905.42	2102.36	2004.44	2376.48	1874.36	2182	4046.49	1549.34	2163.13	1888.27	2558.25	2084.05	3702.63	1755.2	1882.7	2093.99	2452.26	10352.7	8611.01	6203.77	3569.66	1704.39	2008.19	2392.8	3798.15	3136.09	1993.36	4170.93	10770.7	5436.76	6151.02	3928.47	7666.46	8779.93	4050.21	3194.25	3262.96	1606.97	1997.93
297	0.4	1	0.6	340.176	611.096	584.973	765.245	864.956	1017.56	942.832	1049.95	785.639	628.225	592.574	749.449	521.609	530.768	596.582	757.558	994.132	970.882	1267.18	1077.29	1085.15	1167.23	920.316	601.05	589.637	740.95	552.3	668.74	1034.83	1046.58	994.092	1126.79	1170.5	1120.14	683.206	670.673	631.834	571.787	609.323	796.931	913.343	923.599	1182.09	995.013	1021.84	873.861
1036	1	0.3	0.3	247.33	281.498	255.124	201.764	207.584	267.724	198.452	210.713	184.844	228.554	262.649	185.35	255.076	237.159	216.755	206.832	239.41	196.705	198.145	205.102	157.807	226.13	182.47	227.307	275.896	233.444	201.505	157.386	235.027	305.244	171.356	229.438	162.781	231.543	316.196	785.697	532.754	963.81	527.925	889.154	793.341	644.213	451.585	362.1	185.634	245.712
989	7	2	0.2	241.255	392.576	256.345	849.222	208.837	286.022	143.44	278.752	114.082	227.519	146.198	275.947	177.458	193.986	150.939	256.213	413.617	1259.98	1253.75	282.177	158.437	539.432	689.413	473.772	796.225	934.018	1083.59	315.596	1451.53	2093.54	605.943	818.733	237.402	168.287	260.653	1280.02	372.736	602.39	796.023	3155.14	1951.15	1581.02	267.386	190.037	206.061	315.281
1026	5	0.3	0.1	81.7601	187.481	158.622	111.62	139.739	163.222	107.183	156.115	83.4113	159.703	169.588	113.587	38.3383	54.3728	50.9831	75.2831	159.623	167.337	113.974	159.157	122.308	143.073	125.09	187.399	197.222	148.704	150.955	140.579	175.756	444.568	223.097	182.158	113.687	157.97	231.817	1059.56	110.229	397.445	388.567	814.11	504.62	265.015	257.414	151.186	122.73	199.77
1848	5	1.5	1	278.378	149.901	471.639	174.544	186.655	233.666	207.258	223.692	273.481	228.894	190.644	69.198	86.8985	149.173	187.501	174.649	171.805	138.532	112.611	59.707	90.5155	67.5254	50.2688	90.6646	309.05	159.136	222.597	303.947	156.469	208.046	133.393	126.355	79.2448	226.11	188.009	431.26	136.034	287.969	238.015	574.291	538.96	245.046	334.051	264.147	346.204	225.808
1869	2	2	1	243.19	118.311	399.61	294.255	331.866	226.016	168.542	104.628	449.74	130.602	243.354	81.2122	40.4726	116.057	137.131	60.8954	77.2383	48.2114	57.7113	43.8909	15.9645	40.6275	13.3993	20.4179	247.852	136.535	141.213	343.112	84.0006	218.862	129.378	81.2182	87.7618	85.5186	173.563	374.145	238.574	498.891	350.225	680.762	562.761	232.677	275.008	155.02	178.934	245.648
7313	0.7	0.2	0.1	206.194	269.159	296.323	419.078	531.909	569.094	409.995	467.271	528.478	394.01	380.742	341.723	292.594	262.904	306.376	330.029	620.966	1018.08	384.717	440.012	337.971	355.937	361.52	308.241	241.151	325.099	358.139	431.306	550.584	987.493	730.537	426.767	530.976	471.724	451.297	425.241	461.674	356.581	381.836	412.255	496.285	498.858	489.996	465.632	483.721	511.298
1042	2	0.4	0.1	107.533	102.406	98.8588	84.1123	80.8419	90.9138	71.3276	84.7792	88.578	91.695	84.2948	84.1262	88.3695	82.0927	71.2319	66.8637	92.1654	75.9482	66.8529	47.6632	19.0901	44.0276	35.4771	37.2191	92.5236	96.7923	74.272	84.1178	103.092	89.8817	77.5424	81.9571	73.6045	97.0116	127.873	228.717	163.942	92.3661	122.301	356.51	342.891	100.896	110.669	94.1496	90.24	111.791
884	0.2	0.1	0.1	1861.92	1304.32	1641.03	1539	2140.58	2021.56	2386.64	2751.26	2131.88	1935.48	1913.71	1144.94	1402.52	1374.93	1778.82	2507.98	2237.04	1798.47	2176.17	2324.58	1787.18	1518.11	1101.19	1286.38	1487.31	1079.36	1417.81	1722.2	1708.53	1218.25	1953.6	2348.49	2245.76	1770.68	1918.76	2049.04	2245.21	1582.46	1370.62	760.022	946.211	1581.68	1420.04	2729.58	2047.82	2063.04
1144	0.5	7	0.1	1182.94	1579.8	1182.32	1085.74	1150.14	957.108	512.597	331.478	959.064	861.205	1018.56	1136.83	944.321	843.632	950.103	795.498	883.647	1998.27	899.393	789.118	572.408	2107.87	1855.17	1281.72	1124.83	2368.41	1409.59	997.246	2506.06	2838.84	1762.55	1017.99	811.476	837.887	866.173	4183	1703.05	2080.16	1607.47	1521.67	1817.32	1155.46	1113.72	801.87	580.426	844.865
1006	1.5	1.5	0.2	32.5592	41.1414	32.5046	105.456	39.6549	24.4449	11.5	33.549	20.4453	38.1422	16.0918	25.964	22.5883	31.7605	24.777	24.4858	40.0555	70.052	57.0868	41.5031	14.0541	55.5627	74.5016	36.4921	137.193	96.8887	88.0685	50.3833	102.47	121.016	26.2988	91.6908	15.5182	19.8877	42.8919	272.957	84.3182	39.4524	42.1271	281.938	147.506	136.91	124.086	19.8107	26.173	122.875
1048	0.6	5	0.2	217.099	152.84	202.066	1335.29	1080.6	1049.23	77.6346	251.268	87.21	256.692	102.783	81.2485	96.3151	53.6839	60.6296	52.126	225.851	152.564	164.326	146.347	174.891	245.7	416.504	214.08	229.051	414.608	437.842	123.809	2371.24	2100.89	917.024	181.574	144.655	174.784	189.739	188.226	218.641	170.863	239.74	1460	1315.64	919.927	524.505	126.359	225.545	312.746
1032	4	2	0.1	53.2847	56.6119	145.104	407.29	109.051	21.0743	21.3175	58.0326	24.7575	62.513	18.8162	46.216	35.6437	46.4743	31.2085	54.9612	38.8892	37.5889	22.0758	40.5855	35.6039	59.4573	41.2428	24.2248	54.3316	130.364	199.661	33.1786	487.605	790.565	262.593	35.4927	21.2179	41.5539	48.5209	158.457	125.341	314.139	332.176	982.007	579.437	256.541	57.9303	25.1029	43.0798	88.5169
355	1	0.3	0.3	143.895	158.335	193.102	172.976	264.243	388.705	283.266	175.876	254.87	202.047	187.198	185.41	163.618	151.492	153.659	120.107	334.17	423.623	300.536	115.424	111.337	186.019	182.002	185.64	154.716	174.205	237.547	153.361	181.22	422.262	372.723	300.538	268.945	369.058	272.043	252.011	288.54	263.156	241.298	179.932	315.508	462.153	383.146	374.632	396.305	373.776
1101	0.9	4	0.8	152.736	70.9981	255.316	348.016	150.124	112.982	166.454	92.8515	177.434	107.328	196.946	56.1896	53.7489	112.206	69.7185	121.447	101.502	159.064	68.9904	90.3677	107.239	51.5907	11.6176	49.9102	122.215	121.105	127.938	128.914	57.7403	144.163	95.8636	197.894	45.9424	46.5896	37.0995	233.568	205.265	272.626	180.347	327.484	371.442	88.8827	120.965	108.28	119.165	132.972
1023	10	7	0.1	185.679	188.658	210.334	650.704	199.124	189.992	23.0811	56.4191	25.3286	37.6822	36.4688	39.6727	41.0587	32.862	38.1109	34.3234	63.9904	133.234	86.7698	241.481	30.5907	50.376	393.353	110.219	39.2748	425.992	31.7959	145.924	823.932	645.139	241.428	91.8518	31.8411	37.833	41.8058	43.6086	39.6936	190.693	384.584	742.972	412.338	657.772	64.8223	29.1707	37.2309	449.575
1864	0.7	1.5	1	122.958	62.9956	216.572	87.1799	93.2884	120.413	89.5272	100.792	140.203	63.8966	69.2502	32.7725	28.2116	74.9984	91.8301	40.1457	56.0648	32.0528	36.2761	25.0944	29.1298	57.3336	13.6495	34.8398	110.801	78.3872	44.7654	158.744	52.027	86.0077	32.1925	101.555	87.4427	103.483	142.96	188.792	72.5807	194.624	172.278	255.92	258.636	137.756	144.67	105.001	149.56	94.4255
1021	7	0.3	4	121.726	230.495	114.418	80.0417	57.5731	96.385	4.73682	34.3876	10.8705	26.1815	1.64627	64.6268	6.11283	3.9804	16.2201	6.9007	44.6457	10.7546	20.2568	21.9227	35.7912	29.408	58.0264	17.7127	23.7177	33.0848	21.1526	19.9841	194.112	182.24	150.171	10.527	10.7161	36.8147	34.379	22.0251	23.6194	27.319	35.1807	25.6493	65.3581	145.299	12.3166	32.9575	35.9132	26.0004
1120	0.4	2	0.3	10.1955	7.56918	7.48945	4.46439	13.7519	3.06532	2.00965	5.99935	17.1509	3.50641	5.64601	5.334	9.78946	10.1729	5.99997	8.40891	8.55221	7.19586	9.58077	4.87641	5.26846	19.9389	2.21996	3.26212	16.3673	3.9411	8.18955	4.96154	18.7948	5.66587	4.47595	3.18954	8.558	4.81932	14.9837	8.16157	7.75043	8.6437	5.81668	7.16128	10.4806	5.59808	2.48763	12.2585	4.50507	74.43
182	0.3	0.4	0.1	1055.2	858.725	586.856	495.562	470.036	243.107	190.533	160.543	185.942	148.97	178.432	175.02	175	150.101	197.541	164.976	163.109	140.209	176.707	189.459	178.345	132.458	274.63	450.014	750.419	1055.81	893.059	1343.67	904.098	442.259	216.319	188.026	173.146	206.543	402.427	752.674	615.318	927.706	1488.43	843.967	983.802	899.68	448.9	219.371	184.933	169.384
7311	0.2	0.4	5	38.9136	157.668	296.745	10.5479	21.3992	5.80126	8.84979	45.5387	15.0797	24.1351	0.177378	1.16705	0.0595204	0.544658	1.49214	1.98184	15.9157	14.46	5.70149	2.73207	0.579534	6.18441	15.0971	3.42553	3.82767	11.7638	22.1547	5.89142	47.8064	143.129	4.27128	19.8824	6.94615	34.6202	15.7843	56.1938	7.45913	34.0368	34.3011	94.9216	76.6117	18.3551	8.97658	9.40848	31.9509	48.2153
1755	1	2	0.7	103.065	108.296	109.946	59.511	92.2601	78.2929	83.9158	79.4711	72.5099	32.2434	25.1038	28.4842	27.422	119.082	67.249	101.223	81.399	133.45	75.5344	83.87	77.8722	81.5356	65.856	107.566	113.911	206.281	116.088	121.547	86.0928	80.3119	86.5417	99.0093	105.512	72.4511	96.6936	141.997	67.0388	91.1938	74.1767	155.014	347.019	163.462	137.413	96.8517	64.0145	142.22
1192	0.5	4	0.3	250.373	423.117	262.886	426.208	403.176	80.7871	69.1074	82.3989	83.8072	72.1538	85.3749	72.4151	69.0731	77.8866	76.4157	71.0222	131.212	499.131	116.39	79.6641	78.9566	108.995	70.9458	74.8332	94.0881	132.39	104.408	113.963	155.423	112.558	69.5585	74.4123	92.308	80.559	95.0774	418.993	180.473	504.801	382.34	195.241	267.974	60.4761	89.5821	66.0966	75.4747	79.8381
541	7	0.1	6	54.692	15.4217	72.79	97.7686	313.194	484.09	154.302	81.9231	53.0829	15.6116	53.4197	16.5936	51.5874	15.9361	17.1978	58.9552	50.2948	118.6	75.7053	47.3529	15.5705	52.2646	16.3195	62.9695	16.9708	15.2285	73.4307	63.9957	240.922	323.583	166.987	130.83	93.567	50.3054	82.6854	15.3967	58.2801	15.2025	60.7969	67.4929	242.696	428.464	260.927	116.698	80.6202	55.279
1716	0.4	6	0.4	24.2211	23.3734	25.2191	30.8601	19.5521	18.2382	19.9014	19.12	18.563	19.682	20.7321	27.0178	19.221	26.7241	14.0865	19.6829	37.9119	11.6377	18.9319	20.0526	19.043	19.8709	19.5275	34.4482	87.1454	95.7936	33.7157	31.6079	20.6228	20.0068	19.8136	19.0218	19.7728	20.2243	21.2709	184.806	32.2545	77.8842	25.0396	159.377	79.0023	57.3266	17.8067	20.1931	19.2191	33.0008
1883	0.5	0.6	10	66.8677	45.1472	71.3571	67.4311	75.3146	52.5036	63.6333	52.812	31.9959	20.5109	41.2972	38.9426	37.8345	48.6091	49.9996	50.186	60.5001	63.5119	64.1162	62.2153	57.9965	54.8808	38.0243	47.9906	49.9205	46.8015	48.4611	56.2456	56.5532	43.5581	29.8401	20.5225	14.7935	15.8117	14.6946	83.9236	32.9701	174.376	39.6023	59.7344	86.5336	50.7472	62.5353	63.1905	59.8736	56.8262
895	1.5	0.3	0.1	1391.74	1024.23	1544.86	2181.57	2255.18	2204.34	2478.85	2761.63	2485.18	2633.74	2457.8	1303.3	1005.41	827.675	1701.83	2472.63	2471.41	2365.44	2425.21	2478.09	2379.29	2626.4	1372.35	1017.28	1087.77	914.367	1489.73	1927.62	2246.71	1987.74	2292.81	2398.18	2367.47	2545.32	2890.6	1945.8	1883.2	1459.59	1700.66	1103.61	1965.84	1424.52	2133.85	2665.39	2598.79	2651.88
1093	0.4	3	1	10.7626	38.3378	44.2337	65.9278	141.012	59.4349	2.19305	4.95073	26.6743	21.9565	5.50318	56.5902	7.16005	39.1769	72.2002	36.6999	155.26	127.728	88.5113	114.549	23.4992	144.176	48.7272	28.1059	150.577	99.8666	101.797	80.3367	230.523	174.552	58.7125	112.431	1.115	22.1612	21.2545	204.176	60.8563	150.432	91.3438	133.233	243.283	70.9319	114.334	48.5571	3.27517	16.1189
1709	10	0.5	0.7	159.445	136.438	144.508	278.513	97.4299	77.2566	157.247	125.312	91.3998	135.581	96.6318	84.7592	62.9761	192.262	111.682	226.595	532.34	111.046	140.887	137.445	81.1619	175.526	113.998	189.45	121.515	358.543	454.813	136.478	132.108	479.025	85.2215	73.3592	23.8577	49.7781	133.638	119.734	96.7969	155.634	161.465	233.237	205.763	86.0215	150.288	53.4139	116.844	123.952
1017	8	1	1.5	33.228	52.8405	71.1288	68.5947	40.5721	21.1061	9.54215	24.3979	12.8515	11.8161	19.6687	19.4352	18.2945	25.2995	20.4126	32.5459	116.068	63.9518	78.1182	23.8167	17.1467	19.0541	56.6362	32.8056	70.8398	159.674	88.9318	96.5372	46.1266	43.4191	23.2931	115.553	69.6939	49.5806	61.3373	203.76	75.0932	93.6797	108.179	249.771	110.574	80.0695	92.3028	121.428	71.6583	28.739
[truncated: 434 more columns]

## Sheet: Storage(OBS inflow-No Demand)
grand_id	p1	p2	p3	1980-01	1980-02	1980-03	1980-04	1980-05	1980-06	1980-07	1980-08	1980-09	1980-10	1980-11	1980-12	1981-01	1981-02	1981-03	1981-04	1981-05	1981-06	1981-07	1981-08	1981-09	1981-10	1981-11	1981-12	1982-01	1982-02	1982-03	1982-04	1982-05	1982-06	1982-07	1982-08	1982-09	1982-10	1982-11	1982-12	1983-01	1983-02	1983-03	1983-04	1983-05	1983-06	1983-07	1983-08	1983-09	1983-10
753	0.6	0.5	0.1	21187.9	21007.3	21087.1	21123.8	21044.3	21330.6	21953.4	22027.9	21933.8	21992.2	22054.8	21672.9	21255.6	21111.1	21114.6	20922.4	20549.9	21878.5	23296.2	23383.9	22990	22613.6	22421.4	22275.2	21871.2	21578.1	21943.7	22999.4	23580.9	24712.5	27017.5	27960.5	27751.7	27601.2	27510.6	27136.7	26785.9	26587.3	26930.3	26852	26251.7	26261	27290.9	27607.8	27153.8	26577.5
870	0.6	0.5	0.1	20576.1	20585.3	21075.1	21357.2	20970.8	20550.5	20329.3	20344.4	20326.6	20397	20565.3	20753.1	20708	20929.5	21343.9	21238.6	20671	20417.2	20613.2	21042.4	20958.6	20671.9	20265.7	20221.7	20305.6	20771.6	21870.1	23418	24205.6	25562.9	25799	25657.5	25296.5	25008.2	25084.8	25449.1	25275	25113.1	25827.9	26383.5	26332.4	25819.3	25190.2	24657.6	24609	24306.5
597	0.3	0.4	0.3	23510.2	23484.3	23655.8	23738.6	24830.2	25069.3	25057.6	24754.4	24384.5	24104.6	23835.9	23649.3	23445.2	23169.4	22871	22475.1	22187.4	22333.7	22219.2	21770.4	21340.3	21187.4	21026.8	20756.7	20393.3	20095	20060	20054.7	20887.2	22580.3	23969.4	24173.1	24280.1	24435.8	24616.4	24749.3	24730.3	24746.2	24943.7	25070	25070	25070	25070	25070	25050.2	25069.4
307	0.5	0.3	0.3	16419.3	16369.9	16350	16418.2	16379.4	16794.2	17298.6	17075.9	16720.7	16469.9	16477	16434.4	16469	16472.4	16477.9	16458.5	16614.8	18251.2	19041.5	18774.5	18302.4	17908.3	17579	17291.2	16964.3	16803.3	17006.8	17215.8	17295.8	18396.6	19628.4	19638.7	19349.8	19111.8	18903.4	18704.2	18506	18329.6	18242.8	18055.1	17904.2	17954.6	18062.1	17985.1	17687.2	17395.2
1753	0.4	7	0.4	2153.47	2513.21	2010.04	2609.46	2077.41	2576.5	2269.64	2332.22	2574.43	2635.1	2571.49	2886.11	2691.32	2201.28	2347.91	2448.52	2209.63	2014.51	2560.99	2763.3	1729.71	1874.1	1709.99	2153.17	1995.56	2328.7	2422.61	2566.49	2190.55	2190.29	2315.07	2226.49	2301.61	2430.28	2361.94	2014.1	2504.9	2220.4	2460.88	2151.64	2210.98	2583.68	2363.16	2413.69	2159.59	2016.65
297	0.4	1	0.6	1754.13	1383.62	941.478	728.204	1831.89	3409.98	3821.38	3453.13	2938.56	2658.9	2383.33	2066.08	1758.36	1544.67	1218.01	958.714	1414.06	3424.35	4647.7	5023.28	4589.67	3849.69	3101.78	2649.39	2257.19	1800.49	1478.8	1228.05	1317.39	3081.68	4602.6	4575.33	4060.25	3439.15	2908.27	2579.61	2251.26	1957.83	1663.18	1425.75	1644.84	3225.33	3969.51	4066.96	3601.41	2993.07
1036	1	0.3	0.3	3595.66	3501.15	3547.13	3729.22	3823.57	3891.21	4076.49	4124.92	4087.04	3985.87	3803.48	3692.51	3549.7	3335.65	3236.43	3118.76	2994.69	2935.54	2856.44	2793.21	2727.22	2601.37	2501.31	2423.47	2429.48	3019.9	3416.72	3650.95	3641.94	3709.21	3963.23	4030.88	4060.3	3972.5	3891.91	4787.26	5193.86	4768.32	4651.87	4692.61	4922.26	4803.62	4649.21	4651.81	4637.85	4528.41
989	7	2	0.2	1499.8	1390.38	1620.55	2483.87	2543.36	2435.14	2334.16	2185.12	2095.57	1943.48	1800.1	1578.94	1431.4	1279.04	1131.36	975.991	932.604	1850.36	2682.33	2530.8	2528.17	2478.64	2528.98	2528.87	2493.34	2509.33	2527.67	2536.63	2487.95	2638.33	2550.61	2508.09	2489.9	2457.97	2374.93	2491.26	2544.41	2520.34	2524.37	2724.75	3469.76	2956.76	2517.73	2463.56	2329.34	2244.52
1026	5	0.3	0.1	1703.68	1723.11	1831.69	2048.03	2099.77	2122.46	2146.15	2094.5	2041.93	1946.26	1815.01	1733.83	1697.15	1678.46	1680.55	1695.85	1729.95	1860.41	2038.2	2159.42	2211.31	2185.69	2188.93	2147.49	2157.08	2585.22	2751.68	2887.18	2916.77	2922.25	2944.16	2923.87	2958.57	2902.56	2834.6	2718.05	2943.7	2875.4	2940.36	2910.36	2936.94	2943.79	2931.3	2947.61	2943.14	2889.24
1848	5	1.5	1	368.931	416.391	565.546	1104.3	1250.87	1138	981.847	811.584	620.616	443.63	363.711	368.592	366.892	366.622	367.137	370.357	364.284	369.328	365.776	360.872	359.403	361.183	363.666	366.368	372.934	435.994	447.812	461.355	513.364	430.424	372.899	361.824	363.884	369.413	363.826	580.965	1171.8	1311.99	1451.77	1558.23	1711.62	1778.47	1512.28	1278.79	1084.28	855.238
1869	2	2	1	331.609	401.267	713.184	1406.77	1448.01	1277.88	1160.14	1045.93	854.179	594.682	485.362	357.632	329.75	329.326	326.51	332.639	323.87	331.644	327.914	330.382	323.247	325.803	323.983	329.461	322.476	363.56	351.263	450.763	596.662	490.774	353.548	330.588	329.448	329.74	328.774	680.692	1371.5	1453.88	1476.58	1402.96	1425.05	1405.27	1243.05	1134.69	1002.23	851.714
7313	0.7	0.2	0.1	1763.07	1760.72	1761.81	1759.43	1900.86	2356.09	2495.93	2210.2	1876.71	1766.17	1761.92	1761.95	1762.22	1760.91	1762.24	1761.34	1879.46	2489.07	2481.47	2178.49	1828.88	1759.99	1761.85	1762.55	1761.07	1759.84	1761.95	1762.33	1903.1	2403.92	2527.05	2377.67	2106.74	2012.8	1992.64	1954.54	1855.75	1772.28	1761.75	1762.81	1800.58	2119.13	2468.41	2390.29	2183.95	2109
1042	2	0.4	0.1	1070.12	1065.26	1105.08	1224.75	1292.18	1320.88	1318.47	1273.32	1215.35	1164.79	1119.66	1078.5	1034.41	992.937	976.714	977.737	983.922	998.968	988.624	976.058	974.784	974.59	976.934	976.442	976.995	1114.37	1200.61	1228.61	1249.65	1308.37	1342.13	1320.78	1282.19	1230.27	1179.16	1628.26	1710.33	1705.63	1693.16	1698.24	1709.78	1704.44	1681.92	1634.73	1571.94	1518.61
884	0.2	0.1	0.1	2343.31	2343.36	2343.09	2343.45	2343.5	2343.6	2343.6	2343.6	2343.6	2343.46	2343.22	2343.45	2341.67	2342.96	2343.6	2343.6	2343.6	2343.58	2343.6	2343.6	2343.51	2343.04	2342.25	2343.55	2343.51	2343.03	2343.39	2343.43	2343.42	2342.91	2343.6	2343.6	2343.45	2343.6	2343.6	2343.6	2343.6	2343.6	2343.51	2336.6	2342.82	2343.6	2341.97	2343.6	2343.6	2343.6
1144	0.5	7	0.1	787.245	769.895	811.266	788.266	784.919	802.07	799.442	805.078	783.209	746.526	801.527	759.788	797.888	781.455	775.037	799.094	797.765	687.193	811.984	788.675	798.074	712.339	809.714	803.088	789.488	745.671	806.487	801.928	736.548	792.463	805.556	800.467	795.994	793.766	790.808	724.224	815.987	734.723	813.464	794.319	766.826	802.592	788.516	792.597	789.003	786.174
1006	1.5	1.5	0.2	687.14	692.352	743.187	823.635	823.209	820.5	807.767	776.801	753.869	729.998	719.984	705.488	690.477	670.207	655.639	644.586	651.941	733.748	824.909	820.986	812.205	800.721	822.965	821.076	819.608	822.561	822.775	822.592	820.357	822.097	821.803	795.859	815.129	817.827	812.289	827.168	827.697	821.645	819.795	831.221	958.434	930.795	831.468	814.495	796.256	797.532
1048	0.6	5	0.2	206.419	273.692	402.599	672.171	740.398	681.387	710.54	634.746	526.499	384.397	263.045	202.691	202.39	203.889	202.881	199.284	200.965	364.389	496.577	552.767	534.332	502.937	699.702	761.021	711.254	710.642	692.956	722.786	590.554	757.928	770.801	762.988	703.253	592.126	457.72	349.942	273.812	308.484	459.019	708.495	661.531	754.735	757.626	750.797	644.457	617.553
1032	4	2	0.1	483.551	489.632	590.292	759.162	758.62	742.218	715.639	667.676	628.873	590.661	553.603	510.961	479.588	436.047	400.949	375.679	379.831	431.171	515.751	512.359	514.471	509.202	593.599	639.316	649.727	739.157	755.929	762.313	716.134	788.706	787.189	751.804	751.661	726.992	700.565	715.744	738.394	739.321	752.102	796.088	921.117	776.698	757.7	729.816	683.172	683.009
355	1	0.3	0.3	1224.59	1224.2	1223.89	1224.66	1223.11	1227.18	1251.61	1223.73	1223.51	1224.95	1224.3	1223.92	1224.25	1223.82	1224.97	1225.8	1219.61	1321.98	1340.67	1205.94	1190.84	1219.57	1224.55	1223.74	1224.29	1223.45	1224.34	1225.29	1223.59	1230.64	1316.49	1285.57	1223.49	1226.98	1224.5	1224.12	1224.14	1224.45	1224.8	1225.17	1223.66	1299.16	1597.94	1559.34	1369.5	1249.49
1101	0.9	4	0.8	171.801	187.567	230.666	673.925	672.042	632.86	550.374	481.558	379.881	280.686	204.316	187.987	172.1	167.676	169.249	193.204	181.231	203.217	254.591	238.874	173.751	167.055	167.864	165.002	166.281	218.604	290.142	324.157	371.964	315.313	258.343	201.51	170.828	169.29	168.291	275.958	628.156	641.912	608.116	620.094	641.228	673.731	649.296	586.06	503.941	394.385
1023	10	7	0.1	598.004	579.997	571.407	583.962	621.548	577.154	528.231	523.764	530.461	518.168	503.12	494.049	486.565	478.158	475.942	475.158	495.415	592.206	623.453	550.123	488.357	524.471	514.623	624.33	584.703	522.53	506.021	613.5	565.375	590.857	627.768	611.46	614.309	611.096	603.361	601.421	611.836	590.648	587.869	583.875	589.854	593.791	580.585	641.287	645.988	497.893
1864	0.7	1.5	1	147.301	157.847	228.319	466.942	523.767	466.279	394.036	316.469	234.821	149.443	145.896	148.167	147.002	144.902	147.326	148.134	146.09	148.156	147.457	147.997	145.72	142.488	139.179	143.859	141.969	148.562	148.145	158.037	190.2	152.435	147.216	145.517	166.404	187.347	173.824	285.144	562.436	598	605.84	624.33	666.82	676.88	560.376	491.328	410.564	369.319
1021	7	0.3	4	477.519	296.414	127.34	113.868	117.269	114.29	120.4	104.895	85.0248	67.2332	53.6331	11.4218	0	0.000781705	0.00442875	0.0235329	10.1653	45.0024	49.9794	41.4989	50.857	58.6771	111.027	120.017	112.714	105.01	112.505	117.54	110.28	125.74	116.955	120.413	110.868	87.8786	64.6325	43.5365	32.4797	21.623	28.6755	96.9517	117.191	116.467	120.43	107.737	80.0539	71.0512
1120	0.4	2	0.3	298.801	293.324	288.726	284.469	280.591	283.884	278.461	270.994	256.859	250.934	246.493	242.561	237.909	228.644	222.769	220.108	219.256	235.138	233.818	226.528	225.968	226.356	231.656	229.568	221.853	217.168	218.2	219.291	273.679	381.85	430.916	434.677	427.953	421.954	414.078	404.588	401.614	402.016	405.189	404.339	414.461	430.055	429.394	415.777	406.768	442.846
182	0.3	0.4	0.1	1050.82	1102.7	1102.7	1102.7	1102.7	1102.67	1100.13	1076.16	1030.56	999.11	941.261	924.897	916.33	926.346	968.397	1074.2	1088.11	1006.14	828.947	646.679	529.867	449.797	488.739	850.34	1102.7	1102.7	1102.7	1102.7	1102.7	1102.7	1102.21	1102.52	1097.82	1091.71	1102.7	1102.7	1102.7	1102.7	1102.7	1102.7	1102.7	1102.7	1102.7	1102.69	1102.55	1095.56
7311	0.2	0.4	5	451.683	402.238	177.545	95.2312	99.0082	94.0134	88.5111	58.3851	36.8162	4.66677	0	0.00639997	0.0138305	0	0.00188552	0	0.0205868	3.40352	2.833	0	0.00053166	0.00295227	0	0	0	0	2.24616	4.40494	7.2428	96.6956	103.421	94.6633	86.0998	64.9806	44.0351	6.36921	0.124272	16.1399	30.1502	100.049	88.6173	85.7195	76.6495	72.2434	45.8089	16.0112
1755	1	2	0.7	100.41	134.349	240.241	355.87	351.409	312.409	262.715	205.659	146.855	102.108	97.4026	92.5403	94.1474	180.793	243.159	240.053	232.48	311.773	323.791	270.548	213.441	154.577	101.65	114.389	267.035	397.985	392.93	384.299	370.537	341.759	292.107	234.072	223.257	197.41	139.173	119.79	196.596	253.398	276.375	290.467	471.536	547.109	407.925	329.151	251.53	146.718
1192	0.5	4	0.3	265.376	351.68	355.525	343.303	350.267	358.235	347.125	303.246	258.049	225.571	203.721	197.76	194.279	188.733	204.415	219.304	259.874	350.313	360.178	346.843	316.322	298.21	315	314.96	305.639	339.918	355.834	348.187	345.255	351.755	363.318	348.721	304.839	278.706	271.633	339.922	357.524	322.078	351.957	354.452	272.242	268.914	316.977	333.467	302.614	265.392
541	7	0.1	6	627.911	624.975	629.176	609.886	621.471	623.336	630.995	629.661	628.542	628.408	622.252	635.04	619.283	625.062	638.11	615.876	630.187	621.807	629.886	629.522	632.205	622.963	633.088	617.273	619.894	633.264	618.583	620.561	615.748	624.703	631.182	627.907	625.333	630.442	631.902	619.254	635.209	613.716	626.565	623.442	614.515	619.454	630.558	630.898	627.125	625.727
1716	0.4	6	0.4	203.006	214.559	253.097	287.726	283.551	275.902	264.837	249.618	234.888	221.817	211.103	199.808	191.769	203.424	215.87	212.008	225.683	278.345	278.4	269.587	259.084	246.769	237.192	227.232	247.156	269.496	291.063	288.819	285.48	284.247	276.711	261.894	251.251	241.031	229.386	230.878	289.234	252.982	266.258	284.718	291.495	276.027	274.313	261.317	248.818	260.974
1883	0.5	0.6	10	0.214458	8.71476	13.6615	21.1921	32.0923	37.8074	27.9987	15.7694	3.90614	0	0.059292	0.00484804	0	0.7853	0.0591431	0.14491	0.83775	24.1026	29.6225	23.0392	12.3105	1.48315	0.00362243	0.551152	0.324899	0.274887	0.0323342	0.839506	1.20643	0.128445	0.0181404	0	0	0.00604609	0.00795246	0.545416	18.927	30.2477	36.3742	45.1806	32.4633	43.4951	43.3141	31.0868	22.0688	7.27592
895	1.5	0.3	0.1	372.825	381.617	356.471	366.583	363.348	370.577	367.535	369.198	372.499	368.228	373.383	385.055	364.767	398.615	355.233	359.673	373.025	374.293	370.098	369.863	371.293	366.352	388.899	374.756	379.537	384.996	367.255	362.465	373.048	365.349	373.059	374.807	372.117	369.532	372.83	390.286	370.012	370.34	374.609	359.524	352.817	383.353	354.611	366.035	366.394	370.891
1093	0.4	3	1	37.0619	48.9906	49.7935	50.4541	60.6078	64.24	51.4315	48.0448	37.4921	21.5551	29.195	26.2473	28.906	35.7148	50.952	50.8067	52.5651	178.528	178.069	103.845	50.5596	45.6905	63.1629	51.2874	44.8446	139.06	176.269	144.868	132.929	202.621	169.347	81.4166	39.9395	26.2844	20.3101	83.6678	128.54	69.8021	58.581	51.8272	149.371	194.962	111.397	62.4469	48.4564	39.563
1709	10	0.5	0.7	52.8387	72.8276	169.8	316.466	313.037	315.131	273.121	241.99	201.237	95.2718	47.0791	54.4914	49.2141	65.5627	194.978	291.575	287.23	273.586	303.419	258.793	248.102	205.424	155.459	140.47	235.293	271.027	302.391	337.363	335.86	150.899	81.6047	52.4544	49.187	47.4133	47.8451	90.4056	112.815	79.0532	128.723	247.879	290.521	280.13	263.926	242.401	172.338	59.0521
1017	8	1	1.5	47.4097	46.5151	48.6811	49.1488	49.1144	49.4405	49.8109	41.8645	43.5653	47.6362	48.7077	48.9654	48.7949	48.6335	48.9304	47.4358	46.989	49.3069	47.5505	50.0108	48.6274	48.1738	41.5148	48.9068	47.7395	60.0717	79.7372	51.8659	49.4927	48.4264	49.4013	41.4561	52.8434	49.6371	47.7683	184.392	314.155	282.429	227.28	122.35	293.534	309.046	249.569	160.117	63.8778	48.1526
[truncated: 434 more columns]
