# Supplementary material for: The value of observed reservoir storage anomalies for improving the simulation of reservoir dynamics in large-scale hydrological models
Source: Copernicus journal article supplement (doi:10.5194/hess-29-4073-2025), 2025-09-03
Supplement: Supplementary file 11 [file WA_results_calibrated_against_estimated_storage.xlsx]

## Sheet: Readme
	Sheet name	Note	Inflow source	Total number of reservoirs	Number of reservoirs where downstream demand is taken into account
	Outflow(WG inflow-No Demand)	Simulated outflow (×106 m3/month) where downstream demand is not considered for irrigation and supply reservoirs.	WaterGAP	100	0
	Storage(WG inflow-No Demand)	Simulated storage (×106 m3) where downstream demand is not considered for irrigation and supply reservoirs.	WaterGAP	100	0
	Outflow(WG inflow-With Demand)	Simulated outflow (×106 m3/month) where downstream demand is considered for irrigation and supply reservoirs.	WaterGAP	21	21
	Storage(WG inflow-With Demand)	Simulated storage (×106 m3) where downstream demand is considered for irrigation and supply reservoirs.	WaterGAP	21	21
	Outflow(OBS inflow-No Demand)	Simulated outflow (×106 m3/month) where downstream demand is not considered for irrigation reservoirs.	Observed	35	0
	Storage(OBS inflow-No Demand)	Simulated storage (×106 m3) where downstream demand is not considered for irrigation reservoirs.	Observed	35	0

## Sheet: Outflow(WG inflow-No Demand)
grand_id	q1	q2	q3	1980-01	1980-02	1980-03	1980-04	1980-05	1980-06	1980-07	1980-08	1980-09	1980-10	1980-11	1980-12	1981-01	1981-02	1981-03	1981-04	1981-05	1981-06	1981-07	1981-08	1981-09	1981-10	1981-11	1981-12	1982-01	1982-02	1982-03	1982-04	1982-05	1982-06	1982-07	1982-08	1982-09	1982-10	1982-11	1982-12	1983-01	1983-02	1983-03	1983-04	1983-05	1983-06	1983-07	1983-08	1983-09	1983-10
610	0.7	0.9	0.1	2204.19	4583.12	3663.81	2124	3935.16	4905.99	2053.4	1500.43	1484.12	1556.25	1510.86	1555.91	1541.14	1378.83	1864.78	1614.93	1428.72	1316.6	1158.29	1018.57	984.852	1017	983.662	1015.96	1015.75	919.812	1640.87	1215.69	1018.85	984.979	1016.3	1013.89	979.745	1011.13	977.766	1015.22	1020.99	1046.62	2420.5	2006.42	1098.79	985.79	1017.94	1238.72	1362.18	1464.94
753	1.5	0.9	0.9	1478.18	1376.12	1537.64	2143.22	2720.69	2138.32	1572.04	1331.71	1255	1339.18	1316.35	1377.73	1419.16	1278.41	1435.92	1444.71	1570.89	2659.34	1616.73	1362.98	1252.37	1320.22	1318.4	1343.02	1376.52	1253.13	1452.16	2272.64	3604.65	3197.65	3052.4	1531.93	1381.99	1558.75	1839.69	2004.14	2368.19	1872.68	2386.1	2379.34	2890.94	3253.67	1905.61	1403.32	1299.16	1386.07
870	1.5	0.9	0.7	2302.57	2067.81	2342.8	2211.18	2106.32	2060.16	1932.99	1883.52	1812.85	1871.58	1946.21	2052.84	2059.3	1877.51	2123.68	1880.34	1972.87	1824.29	1866.36	1784.57	1701.77	1753.08	1693.06	1747.86	1745.6	1575.38	1765.17	2753.49	4159.2	2842.38	2334.01	2267.97	2122.12	2472.89	2410.88	2372.81	2317.39	2069.32	2583.37	2722.52	2660.93	2274.23	2068.03	2212.31	2220.21	2313.87
597	1	0.7	0.9	1294.48	1287.05	1446.33	2918.34	6398.19	3648.5	1358.41	1288.63	1220.28	1273.44	1250.46	1286.73	1267.82	1107.23	1177.51	1177.41	1449.18	1378.82	1152.76	735.533	607.221	628.431	686.294	745.595	734.885	651.367	887.306	1046.36	1273.72	1808.5	1179.49	734.307	702.373	795.964	826.992	888.497	889.236	842.168	1336.13	1742.88	1719.05	1543.57	1360.14	1307.65	1243.76	1287.34
307	0.5	0.6	0.2	336.632	296.228	340.589	362.095	396.096	378.185	376.821	311.374	304.242	382.064	395.823	411.733	413.38	373.001	440.132	450.217	471.845	560.25	395.086	346.791	328.864	348.027	350.091	363.515	362.341	328.057	410.038	439.346	422.027	2290.6	781.742	371.878	359.549	371.72	505.186	625.638	672.414	514.204	654.125	692.952	615.255	420.698	370.923	366.232	349.315	364.523
1753	3	0.1	0.1	9381.88	8960.65	16979.6	13465.6	5919.86	3409.07	2562.45	2047.55	1585.45	1994.84	1566.36	2434.56	2428.87	7727.81	5597.06	5428.15	2774.7	2498.7	1662.33	1541.63	750.491	1116.72	728.592	1921.12	12761.7	12280.1	9210.82	5378.28	3882.32	2130.07	2472.42	2011.57	1594.65	1583.34	1539.18	13243.6	8581.16	9711.34	7776.58	11876.2	11700.9	4342.49	2678.52	2070.04	1592.49	1569.37
297	4	10	1	516.159	230.887	338.135	658.729	2599.96	1957.76	1049.95	784.669	843.602	712.826	654.73	522.638	697.847	559.172	642.952	641.099	1474.4	2619.6	2326.07	1128.97	615.926	691.704	510.201	470.483	348.113	300.441	458.47	437.796	1177.65	1782.76	1473.08	709.74	799.25	884.162	578.915	450.047	445.629	369.532	539.833	591.414	1197.6	1456.59	1373.17	881.696	672.62	511.663
1036	8	1	0.8	339.372	392.874	454.66	454.14	404.181	332.854	284.168	273.572	257.704	260.693	250.446	279.834	265.079	263.892	292.6	263.3	280.334	286.645	271.8	247.942	232.987	238.629	293.407	271.918	300.954	504.973	417.654	270.925	259.418	315.992	412.62	401.563	397.989	396.145	390.944	997.93	691.169	532.395	556.326	575.7	720.668	545.033	516.014	503.66	478.365	492.034
989	2	2	0.9	381.618	464.521	993.383	1125.91	678.691	497.749	412.744	340.916	303.177	276.398	261.656	321.475	324.649	292.765	439.001	344.979	429.498	1083.82	1420.89	707.409	546.275	482.798	774.471	751.134	701.807	1149.6	942.949	720.952	664.33	1326.49	854.962	668.57	647.829	548.68	482.622	1038.08	793.745	659.286	773.739	3097.25	1588.99	878.171	669.42	564.209	473.395	526.971
1135	0.5	1.5	0.7	235.78	173.518	204.491	172.693	189.881	276.587	186.601	145.384	134.134	326.092	215.815	323.578	248.796	173.277	296.168	248.335	237.136	293.765	244.974	204.557	181.849	1026.3	1024.87	359.074	295.361	597.299	459.233	311.031	796.9	1743.29	1245.17	457.311	329.323	289.568	255.343	273.908	329.013	783.283	673.31	531.412	569.047	409.613	300.374	245.32	210.92	526.581
1269	0.9	0.3	0.1	443.456	480.856	487.418	463.982	760.693	456.793	459.778	445.171	412.224	408.271	382.011	382.442	353.637	166.056	207.795	129.511	171.791	409.68	312.335	125.351	126.332	120.832	149.327	171.148	202.873	366.005	276.281	317.796	482.992	404.755	162.149	140.929	117.433	120.041	221.23	515.274	500.339	1283.28	949.157	614.254	730.984	480.355	464.372	455.642	427.36	424.848
1077	10	0.6	0.4	212.295	222.815	262.517	241.208	291.003	543.796	265.062	239.502	217.278	213.741	197.259	206.267	196.594	171.6	211.356	202.305	192.639	207.164	204.502	183.499	173.167	207.845	368.606	307.473	254.545	995.555	346.699	281.44	1656.83	1091.59	529.561	295.98	265.672	259.302	238.288	268.535	431.882	997.066	555.368	678.203	865.639	544.377	301.358	267.963	242.804	1001.07
1026	0.8	0.5	0.1	164.865	223.04	323.155	313.486	253.506	187.2	165.112	151.66	141.833	142.255	138.231	172.132	155.694	156.258	179.414	159.345	225.458	311.502	261.066	218.187	165.729	181.12	321.928	281.05	262.596	335.983	332.559	292.963	288.422	274.441	277.335	263.709	263.617	162.617	159.72	573.728	322.503	328.533	318.609	446.575	655.64	309.813	312.247	301.889	280.995	289.97
740	9	2	0.1	16.8223	18.54	20.9487	19.6031	17.5041	13.6338	11.7024	10.3675	10.3278	11.4406	11.7319	12.9694	13.3955	12.1431	13.2317	12.4036	12.0247	11.0893	11.8598	11.2045	10.4567	11.4276	12.0838	13.1513	14.0591	13.6261	15.3711	14.8346	14.5068	13.6409	13.4357	12.8491	11.707	13.1631	14.9615	16.8335	17.4884	15.9667	17.9128	17.3821	16.032	13.5223	13.2295	11.6705	11.3236	13.0442
1294	2	0.3	0.1	42.3134	35.6918	39.2564	38.1	40.9106	40.5663	39.3016	37.3902	36.9465	41.8195	39.9285	74.1514	86.0399	92.8439	271.195	186.554	183.336	429.536	314.63	183.195	156.881	187.755	188.392	168.62	154.51	150.752	144.868	81.0978	103.939	69.125	68.1503	59.4345	57.334	58.1598	56.5159	74.5065	94.1687	181.966	225.898	92.5654	104.673	87.5	68.9468	59.1325	48.8599	49.5869
1848	1	1	0.1	151.599	142.56	175.676	244.006	149.57	139.962	139.353	133.693	123.85	123.419	133.031	160.585	131.621	144.016	146.573	148.641	127.075	126.354	123.244	113.449	104.302	102.918	96.2306	103.069	183.534	179.363	164.451	178.271	144.951	109.836	106.227	101.045	93.8671	93.0717	96.6043	285.897	238.612	159.474	161.259	160.241	159.401	147.058	144.445	138.9	128.948	128.357
1869	2	1.5	0.7	302.385	525.564	667.524	926.573	471.01	263.012	227.645	135.682	74.8593	74.0263	71.596	82.2788	85.351	111.21	174.152	139.966	101.637	82.684	74.7537	65.743	58.0183	56.4057	52.0848	51.7128	85.9701	206.089	191.639	427.212	479.107	102.729	84.9651	74.3713	66.3896	64.3185	59.8846	943.502	977.129	659.245	557.001	709.812	607.955	553.471	292.909	248.8	202.993	187.11
1863	1	1	0.1	113.419	105.524	569.521	123.037	107.835	104.201	106.177	103.575	97.4453	99.4183	97.7361	100.411	96.9855	103.805	112.61	99.8912	96.6969	91.3104	90.096	86.3739	80.3152	79.53	74.2765	77.5746	157.366	140.776	126.415	102.702	110.546	94.9677	94.4629	91.2337	84.7504	85.6135	85.6183	130.952	131.743	114.917	118.311	112.332	107.904	101.855	102.177	99.0001	93.1231	93.3001
1770	0.8	0.1	0.1	96.4344	93.3586	265.471	137.923	94.8747	91.0951	92.6397	90.6914	85.7166	86.2979	81.3437	82.9342	83.7131	88.2367	102.06	90.8122	92.0041	88.4934	89.1939	84.9489	79.9822	80.2527	76.5527	90.5806	111.179	94.7956	219.214	93.5414	94.4345	90.2675	91.5528	89.6488	84.9281	85.4377	81.0313	100.018	99.3498	86.4245	101.764	136.737	187.544	92.582	93.873	92.2047	87.3707	88.2072
965	6	1.5	0.9	65.5275	94.9505	143.244	426.035	144.582	93.247	60.9504	42.132	40.5539	39.6043	40.4639	41.5889	42.2884	35.8482	48.1657	50.2537	56.6824	63.2051	29.9415	41.4882	45.0952	38.212	36.8769	66.2753	45.2279	78.9265	194.685	163.269	221.13	274.371	132.595	89.1622	69.7343	65.106	56.6685	56.1333	65.0137	81.9638	151.556	516.332	282.493	227.441	164.79	66.6147	50.4398	49.7074
1247	2	0.8	0.5	109.83	80.3883	88.8207	81.2729	86.5463	88.3394	77.6124	70.6323	68.2079	183.915	99.6125	304.342	117.249	89.7209	162.244	104.55	107.849	92.6394	95.7618	96.1859	91.4247	294.604	349.843	282.675	275.288	265.876	250.519	117.159	270.531	405.344	349.181	130.786	108.291	101.939	95.5165	97.9142	100.852	141.394	140.884	124.893	101.919	104.028	98.253	91.5957	85.8068	86.5336
7313	0.5	1	0.1	250.858	287.751	498.835	767.273	875.615	1171.63	248.472	202.573	188.541	206.826	203.657	212.913	288.684	352.484	531.505	585.669	1404.85	909.39	239.895	197.481	172.463	180.411	190.415	205.193	211.05	355.73	1124.2	1685.18	1576.1	1109.29	312.698	209.752	196.118	211.569	311.25	434.395	514.659	445.596	1111.84	910.642	790.538	566.864	277.721	210.258	197.821	208.39
1287	4	8	0.7	671.585	650.11	608.283	382.967	527.378	380.735	334.058	292.136	253.504	328.8	307.069	294.56	299.82	240.661	289.888	302.684	304.537	1579.06	625.923	367.65	318.472	1370.5	780.959	682.196	378.589	696.585	435.055	510.311	1238.3	982.361	468.607	394.491	345.625	335.317	428.271	1207.07	545.921	1164.03	1268.27	573.096	946.534	489.835	382.837	335.978	305.261	289.003
1186	10	0.4	0.1	208.701	158.779	100.653	147.501	112.68	35.1509	32.5489	30.494	28.1138	28.5834	27.6122	28.6126	28.4256	25.469	28.5255	27.9019	29.507	77.8712	35.4997	31.7935	29.7421	30.0789	30.0558	31.522	31.0375	115.287	36.0753	56.7334	31.7654	30.0777	29.8303	28.3851	26.422	26.6807	25.758	281.74	44.6768	262.916	170.343	65.8864	32.9977	31.7962	31.2126	29.4328	27.26	27.4089
1042	1.5	0.5	0.1	22.3435	26.0617	30.4137	29.2584	24.4046	21.5486	21.2173	20.3434	18.9995	19.092	18.1375	18.9815	18.7411	19.4303	22.2596	20.9912	21.5418	24.1539	21.2938	19.438	18.1051	18.4487	19.5042	19.6826	25.0092	48.9428	39.131	22.9135	22.2485	22.7311	22.4704	20.8745	19.6177	19.7542	19.9838	194.575	125.312	68.811	35.9975	86.0846	102.439	28.3858	24.321	23.1056	21.5163	23.0818
884	3	0.2	0.1	2829.05	2482.05	2731.82	2718.14	2731.7	2716.78	2938.64	2024.03	2121.54	2135.09	2121.66	2135.27	2135.24	2094.68	2135.3	2122.48	2135.72	1931.46	2325.67	1909.82	1869.06	1882.07	1869.06	1881.88	2066.42	1658.41	1884.62	2065.34	1887.23	1880.88	1887.96	2308.25	2152.03	2358.81	2151.35	2358.24	2164.92	2123.7	2165.33	2349.95	2171.05	2154.93	2360.44	2389.53	2396.81	2410.68
1273	4	1	1.5	18.7884	30.7736	21.6786	18.6428	43.6802	27.7156	3.06353	0.975195	1.21115	5.60949	7.48633	69.6297	22.5703	25.7918	64.7947	38.3098	26.5378	63.5148	22.3081	12.8637	8.52393	78.3458	47.1678	33.7309	33.6071	56.4309	68.9432	54.5291	159.697	90.0142	52.3049	34.7659	24.1262	20.5444	18.2014	20.548	33.1809	49.5417	65.1428	41.2075	34.4206	23.2634	14.5476	10.4207	6.12759	7.71543
961	0.1	1.5	0.4	0	0	0	0	0	0	0	0	0	0	0	0	0	0	0	0	0	0	0	0	0	0	0	0	0	0	0	0	0	0	0	0	0	0	0	0	1.47811	1.61971	1.95682	49.3658	33.7286	20.1587	13.1892	9.67796	7.64157	7.02173
1144	4	0.5	0.1	1269.08	1663.2	1133.98	1052.3	1249.56	716.823	678.061	590.791	510.259	1058.49	863.665	1257.62	891.796	794.748	1045.96	839.668	843.509	1888.15	977.364	848.543	635.926	1977.53	2035.5	1172.77	1040.5	2368.36	1477.74	1052.1	2288.09	2988.12	1542.45	1112.27	856.453	853.903	828.186	4459	1453.4	1867.39	1953.86	1324.94	1724.1	1160.16	1086.41	871.816	663.759	679.11
616	10	0.6	1	1778.02	4227.07	3207.32	2259.74	3603.71	4374.29	2091.06	1835.25	1745.71	1776.53	1748.31	1338.94	1780.18	1693.29	1777.01	1308.37	1779.78	1748.1	1335.67	1762.02	1701.96	1303.14	1706.21	1732.94	1302.79	1652.2	1732.15	1276.84	1733.08	1274.13	1732.15	1255.01	1185.19	1208.49	1183.13	1615.4	1209.75	1132	1209.84	1589.52	1209.32	1182.44	1207.7	1206.45	1179.4	1205.39
911	0.6	0.8	10	508.685	502.32	575.811	689.495	468.448	398.64	268.784	208.696	205.705	177.45	155.24	157.329	151.648	135.947	202.737	159.614	145.461	114.912	137.445	140.923	112.741	101.141	108.645	167.389	143.922	689.98	1257.97	875.46	1178.69	942.229	672.022	482.034	417.253	402.287	522.338	1226.93	718.232	1414.67	2058.61	2404.28	1379.33	970.593	1044.61	632.567	480.507	463.634
1006	1.5	0.5	0.1	22.5468	26.8867	33.1983	31.549	26.217	23.5098	23.0742	22.0322	20.5496	20.6606	20.1432	22.237	21.0512	21.8732	26.0079	22.1506	26.6379	35.4922	33.4747	25.4861	23.3297	24.6155	36.5108	44.7311	46.2602	117.975	94.2374	27.8706	25.4334	51.0249	25.8346	36.5505	43.7626	24.0319	23.4546	141.83	86.6405	40.3724	26.4335	112.244	129.154	66.6184	27.7091	24.6875	22.9259	64.442
1048	10	1	0.6	399.597	522.577	790.252	1747.88	1218.06	1182.49	744.207	618.303	543.285	457.649	352.53	348.036	329.038	290.859	331.971	302.149	260.467	273.809	244.133	215.917	197.78	195.159	275.931	379.223	289.991	604.488	717.517	556.983	578.506	1477.95	796.626	630.849	542.402	380.692	303.019	349.481	306.572	482.374	552.697	1141.45	758.629	770.226	721.835	651.7	586.786	609.246
1123	1.5	0.1	0.1	52.9318	83.1279	41.5633	32.8563	43.1564	17.3287	4.93665	4.78217	12.8483	104.807	38.4271	64.2967	26.4287	47.5053	46.5061	27.4962	59.165	96.038	30.5064	16.5885	9.21196	22.1045	18.304	28.5188	45.9567	112.433	95.8304	33.1611	84.2624	121.158	72.7148	17.1197	13.8952	13.5916	21.8945	132.659	107.475	80.2095	100.118	50.829	119.598	89.2668	24.8114	9.59639	6.88548	13.2911
1032	4	1.5	0.7	112.677	152.715	234.075	370.342	203.22	156.852	137.771	121.315	107.107	101.182	90.0551	86.8642	80.0629	69.1761	84.6316	83.353	89.6333	129.367	114.936	88.7135	75.9484	72.1245	158.063	158.149	121.865	198.841	185.361	147.642	275.528	662.529	228.624	168.214	145.511	134.743	118.811	134.31	201.113	409.529	321.109	675.931	468.603	261.19	196.546	160.735	139.584	243.823
1774	0.9	0.2	0.1	275.689	452.949	1010.14	489.054	323.429	267.954	271.891	262.445	242.325	236.886	150.176	104.912	98.8596	194.253	291.225	280.948	277.05	271.745	262.975	243.69	185.763	86.7584	73.3223	113.787	260.705	823.218	850.423	312.081	276.966	264.199	265.308	254.201	247.707	240.247	236.256	291.762	294.389	658.705	531.642	637.689	523.057	285.824	274.819	266.912	246.956	241.258
1781	0.5	0.8	0.2	283.364	558.874	1806	944.55	452.073	246.432	239.697	229.03	207.52	198.998	194.771	272.515	255.904	264.528	390.901	633.221	242.636	300.367	235.521	219.675	195.439	193.719	247.563	223.432	307.295	1290.15	1199.43	497.791	315.925	251.746	237.62	232.873	214.691	205.051	196.096	558.976	678.521	1497.25	1462.07	1422.08	598.721	298.48	241.963	234.025	214.212	206.468
355	0.2	0.6	0.2	156.851	131.712	191.812	601.144	727.397	197.313	46.1771	42.5791	39.5018	40.058	42.7939	81.2224	157.411	170.486	247.067	512.332	1131.98	235.274	47.7222	43.4732	39.9674	40.2462	38.7263	44.4417	46.1528	96.9651	212.622	394.175	603.752	337.552	48.334	43.6616	40.3686	41.0318	43.7102	191.941	283.709	305.951	364.167	850.019	1499.91	529.42	63.8113	44.7769	43.3203	112.314
1101	1.5	0.8	0.6	110.487	104.222	197.823	229.182	199.75	174.402	160.605	79.1616	68.7824	67.1424	69.2216	106.671	89.7047	96.7516	104.708	105.79	89.3389	83.5272	82.8532	72.5587	64.1379	61.6156	56.913	57.0919	72.6967	116.431	125.815	117.539	104.027	79.3912	71.7767	64.905	58.6861	56.921	54.0877	215.797	281.482	200.477	200.254	207.882	308.909	197.292	183.966	165.505	114.747	73.6171
1023	2	10	0.6	283.676	579.973	806.667	1233.06	787.36	875.859	246.521	233.698	208.91	200.001	184.711	184.204	178.917	105.567	175.566	170.778	174.938	182.995	174.38	95.5236	83.0719	60.6368	79.3335	89.7407	80.49	144.705	119.321	153.174	89.9988	221.299	113.868	94.0964	79.0397	68.2595	55.7286	52.5778	53.9401	59.187	91.8489	1073.4	290.595	386.384	231.737	222.186	196.206	187.138
1060	0.8	1.5	0.7	37.4548	40.6863	56.145	61.6369	33.6641	29.9695	27.9458	24.8493	21.933	21.2775	20.0411	43.7033	31.4554	35.5249	51.8046	36.7897	45.9394	56.1638	37.6716	35.2492	31.8195	31.1284	71.946	45.2962	48.2577	185.167	58.4722	34.8387	31.4135	41.6171	42.0481	30.0538	26.7231	25.4568	27.493	312.033	68.6662	92.0184	44.0254	45.8223	175.984	51.0547	36.4918	32.0805	28.6962	28.0606
1864	2	1.5	0.3	236.368	203.95	379.577	466.854	249.543	155.589	32.5758	21.7334	18.8531	20.6709	40.8636	112.434	71.4676	126.921	128.357	86.7062	48.4999	31.7587	26.1509	20.354	18.234	17.8917	16.8062	17.4106	84.9003	214.343	139.003	232.451	190.958	49.4302	28.31	56.007	54.9325	92.0392	98.2123	468.578	455.311	339.219	358.311	368.449	385.811	346.559	182.551	150.444	119.936	86.5122
1797	6	0.3	0.2	3364.41	3004.8	5666.83	2768.74	1636.98	1136.37	1363.78	742.02	997.353	1000.64	700.653	1007.27	1312.92	2915.96	2163.79	2384.07	814.878	1350.56	424.745	664.675	350.623	366.914	357.541	936.074	3307.12	3860.04	3723.78	1246.24	1096.19	1357.97	1048.85	1038.63	1015.71	1017.07	1316.36	3528.24	2232.08	3780.3	2717.92	3536.72	2542.8	1223.12	1062.15	1014.59	692.911	702.836
305	0.9	1.5	1	2151.04	1423.58	1618.73	1965.7	2988.66	3145.53	2098.34	1564.18	1772.57	1551.38	1739.56	2043.36	2445.4	1751.8	2062.45	1903.54	2762.77	3332.62	1881.44	1016.73	971.659	1409.13	1498.27	2236.1	1534.5	1694.26	3015.36	2944.68	2919.46	2697.64	2135.1	1645.75	1434.46	1940.67	1747.57	1954.37	2428.72	1767.82	2247.49	1817.58	1811.85	1752.69	2164.38	1633.21	1302.89	1391.56
968	5	2	0.3	42.5296	46.3624	96.4929	411.11	378.576	112.732	58.4804	58.7786	58.9163	63.7755	63.8222	63.5113	59.4809	53.7689	62.4428	58.3397	127.071	74.9734	50.946	57.2817	52.7112	56.1334	59.5701	56.7443	56.2046	60.3858	84.7076	59.8463	133.51	101.562	67.0329	45.5018	40.3065	38.9289	34.5527	36.0981	35.767	41.9341	68.266	185.384	85.0385	162.426	66.7151	54.213	56.9825	70.7433
1019	1.5	0.4	0.1	8.80658	9.97209	42.7574	49.6814	10.1601	8.94369	8.90124	8.65321	8.21332	8.37695	8.03756	8.26352	8.2207	8.09046	10.9136	9.27595	12.973	44.678	10.5285	9.62684	8.90437	8.87709	8.45162	8.61177	15.4596	63.6204	72.5038	43.6849	37.2395	14.1001	9.04231	8.7953	8.41803	8.63682	8.31594	82.1817	72.6041	43.3132	45.0738	58.5937	66.6866	40.2672	37.6578	35.8899	33.3935	33.4426
1302	5	2	0.7	18.4927	13.6972	14.6185	13.5582	13.2997	12.3813	10.8414	11.5912	15.8513	26.6466	34.3032	43.8943	36.3723	33.388	74.6936	42.4114	35.5899	205.224	100.939	19.3317	17.3641	17.7534	20.8677	20.7989	16.8602	17.4601	17.1577	13.9993	15.4629	13.9898	12.2217	13.1013	12.7759	13.4252	13.1179	14.7348	17.0108	34.8614	52.5313	32.9445	14.8796	14.3165	14.2961	14.3511	13.5606	14.1986
1824	0.2	0.1	0.1	8279.01	6980.24	17684.7	7959.06	4834.11	2805.64	2175.63	1811.39	1564.81	1826.3	1795.02	1887.76	2168.27	6786.52	4633.94	4733.69	2258.18	2106.5	1335.54	1065.29	863.941	836.251	753.915	1678.81	11493.7	9852.13	7436.55	4578.24	2876.87	2175.83	1908.07	1785.31	1560.57	1441.57	1518.57	11182.4	6210.49	8416.19	6693.72	9923.36	8178.42	3387.87	2257.79	1794.9	1469.51	1339.2
1316	0.2	0.1	0.1	0	0	0	0	0	0	0	0	0	0	0	0	0.085181	0.123373	0.220826	0.304905	4.80401	6.12404	7.00362	1.50213	1.17192	1.27221	2.09033	1.23562	0.91765	0.680436	0.811342	0.525672	0.44254	0.469668	0.527777	0.477175	0.3905	0.371933	0.347333	0.339983	0.341708	0.330937	0.388663	0.382901	0.450856	0.419468	0.372182	0.278898	0.244691	0.245731
1835	0.3	0.1	0.1	7223.79	6067.04	14733.2	6427.39	4028.22	2393.34	1911.85	1612.91	1456.54	1517.07	1392.58	1568.84	1807.62	5944.34	3981.56	4164.92	1904.17	1896.59	1164.63	1036.29	899.387	656.106	587.241	1407.77	9145.12	8887.11	6469.18	3543.57	2415.41	1904.03	1697.03	1614.11	1414.81	1317.74	1473.86	8626.99	4997.26	7039.05	5514.72	7505.45	6126.24	2834.22	1909.37	1535.75	1279	1171.36
1847	0.2	0.1	0.1	5992.68	5016.29	11593.6	5294.08	3059.36	1985.65	1595.41	1364.69	1224.42	1157.5	1166.16	1362.74	1478.36	4957.97	3340.7	3607.68	1639.23	1724.88	942.837	755.267	605.31	588.396	551.487	1274.59	6814.29	7690.65	5611.55	2642.24	1969.53	1603.81	1416.21	1363.01	1214.76	1154.89	1362.8	6692.84	3926.25	5807.54	4481.01	5836.22	4267.25	2350.15	1602.34	1310.58	1115.47	1035.01
1231	0.4	0.1	0.1	42.0131	93.7448	62.4553	52.9472	46.0846	29.2739	29.4303	29.1458	27.8436	28.4253	27.197	27.847	27.5504	24.6308	27.037	25.9817	27.0346	142.855	53.6233	32.2245	28.5969	38.6252	83.205	57.8134	50.4787	62.0558	54.0874	42.249	45.9281	37.6955	29.9515	29.4429	28.2417	28.8767	27.7531	242.647	72.075	163.423	91.83	65.0737	54.6641	46.4576	34.8299	29.5401	28.4713	29.2066
1140	1.5	0.3	0.1	5.05688	4.56226	4.9127	4.61025	4.78936	4.75299	4.25773	0.971794	0.920147	0.98516	0.908951	1.10067	0.985072	0.8586	1.00932	0.923267	0.93166	0.914892	0.957048	0.950556	0.899879	0.918625	0.889192	0.914174	0.912917	0.82373	0.910247	0.87954	1.02043	1.34494	1.56448	0.940736	0.893735	0.911367	0.880281	0.912415	1.06261	2.40812	1.44045	1.02733	0.942422	0.908865	0.944185	0.941836	0.897904	19.326
1296	1	1.5	0.6	28.7602	41.5227	30.2672	26.1785	26.9867	26.6368	21.5382	19.2978	7.0907	6.9888	6.45219	6.58051	6.6163	7.22823	8.55013	7.49477	7.35646	43.8367	18.0462	8.52868	7.50815	8.23668	41.6053	12.4919	9.87358	10.8458	10.8601	12.1036	38.1435	16.4119	8.84948	7.81158	7.12729	7.07073	6.72614	30.7388	21.7337	52.6365	60.5439	42.5771	37.7553	40.8621	9.90873	8.66927	7.64618	7.46689
1659	1.5	0.8	0.1	18.8718	21.6394	41.9291	34.8207	26.4276	22.7793	21.4703	20.1716	18.5454	18.0723	16.7814	17.5127	17.8515	26.6146	28.0902	24.7575	35.6577	31.3364	23.4495	22.3991	35.3615	24.1683	21.6226	21.7786	25.5601	42.1188	107.411	72.6608	30.5099	26.0379	25.1715	23.6123	21.6828	21.4516	21.5094	47.3627	32.8398	39.4125	45.6864	68.7184	67.0487	52.7766	27.4952	24.9571	22.7314	24.4463
1277	3	1.5	0.7	4.96638	4.29811	4.44971	4.24274	11.3434	7.52389	4.16655	3.85085	3.5462	3.77497	3.47679	7.19991	6.02473	6.39618	9.15916	9.92593	6.87863	26.1444	19.9109	5.56935	4.83361	4.51742	4.0838	3.97698	3.77251	3.77537	4.53708	4.48885	6.52956	6.01047	4.52216	4.07033	3.65356	3.55687	3.3003	3.74022	4.94768	7.2538	9.67329	8.96328	6.12823	5.32175	4.70082	4.23529	3.76111	3.64418
1021	0.1	0.1	0.1	120.677	212.708	218.926	167.129	98.1506	61.6253	35.8531	24.4949	16.0061	13.9124	10.331	10.9073	7.12484	6.42479	7.0976	6.82902	7.01832	6.79378	6.96258	6.8911	6.61551	6.8192	80.1304	59.7932	53.9798	213.079	84.4031	49.0191	200.26	133.053	78.5362	43.0877	28.6696	23.7746	19.6105	16.4794	12.1922	58.2948	393.979	262.238	121.985	112.508	51.5976	34.1688	28.4732	30.1977
1280	1	0.1	3	81.7557	69.4715	73.0456	66.6005	57.8749	6.39222	5.83746	5.4793	87.6282	117.616	80.0564	145.017	124.271	82.9668	150.032	80.2838	82.8118	79.6425	79.9627	76.5361	71.9071	81.4138	89.8322	76.4944	46.3632	33.2183	24.953	17.5275	28.7223	18.0823	16.6783	7.01589	6.62543	6.81396	6.578	6.81202	12.9302	27.8126	31.2009	13.7144	6.98552	6.69657	6.69227	6.42148	5.95672	6.13725
1120	1	2	0.5	15.7441	15.5931	17.8547	4.4093	6.24866	4.40347	4.35245	3.96808	3.52553	3.44104	3.21984	3.27715	3.21226	2.81826	3.05162	2.8815	2.91258	2.77252	2.80069	2.72384	2.60422	2.66784	2.6305	2.77061	2.83059	2.65543	3.23234	3.51832	7.59351	29.2681	19.984	13.4899	11.2957	8.82417	9.42996	8.19848	7.70536	7.48798	9.9445	9.1784	9.91375	6.83907	5.0284	4.48162	3.92722	38.4006
182	8	0.1	0.7	757.18	633.798	213.519	113.645	45.1952	10.8003	10.4221	10.1179	9.6027	9.84037	34.5173	9.67267	34.6812	171.858	195.264	125.529	11.7625	10.3673	8.98333	7.97732	7.3891	7.53369	51.1634	560.49	290.237	490.142	396.942	525.701	135.819	83.7294	12.6235	10.1434	9.65398	10.1276	312.452	588.045	374.882	544.804	670.386	301.268	113.641	86.5096	12.1159	38.1753	37.3424	37.085
7311	2	0.1	0.1	13.4794	35.3542	45.5007	47.2037	15.1759	12.7275	5.92421	5.75763	5.51606	5.4702	3.83418	3.8763	3.84895	2.13514	3.80493	2.28848	3.80915	15.0157	12.9749	9.18592	5.66257	8.66891	19.1685	23.6261	16.398	44.9479	24.8617	15.3307	47.9316	93.8266	20.9878	17.1185	12.8514	12.5973	10.5896	12.1015	15.9546	52.321	45.5639	95.8423	39.6063	22.8307	11.8217	11.1164	12.3533	10.5273
1755	0.8	1.5	0.3	87.0173	76.1329	172.219	110.372	38.8863	24.0221	18.0287	11.7498	10.5564	10.2484	9.55792	12.7576	25.7064	143.05	80.7501	65.586	41.4835	170.717	22.004	16.0687	14.4854	13.7656	20.2402	97.7574	195.526	187.827	90.2417	74.095	48.2644	25.5522	19.8591	19.806	93.5834	12.1804	13.7106	115.016	119.178	107.895	42.9146	134.732	233.578	207.206	39.3763	21.5363	15.6367	19.6216
1152	10	0.9	0.2	0	0	0	0	0	0	0	0	0	0	0	0	0	0	0	0	0	0	0	0	0	0	0	0	0	0	0	0	0	0	0	0	0	0	0	0	0	0	0	0	0	0	0	0	0	0
1192	3	0.3	0.1	253.354	322.382	235.8	262.757	268.605	184.582	135.697	112.303	107.533	108.302	106.626	108.869	123.855	104.908	141.247	109.868	123.813	234.724	141.378	95.4126	89.9475	90.1035	104.529	107.746	122.772	192.007	155.238	128.417	110.766	91.1759	61.8604	60.4021	57.9822	72.471	71.108	319.646	311.072	365.135	247.875	179.256	166.791	130.019	96.3116	92.5359	74.5402	75.1781
541	9	1.5	0.8	37.5548	31.927	32.3198	29.1439	990.259	661.294	146.236	68.1836	56.2242	51.2514	45.0877	41.5352	36.0803	28.3377	27.9837	66.2872	335.716	133.687	60.12	47.668	38.117	35.2819	33.0559	31.1355	29.3512	24.9018	25.1024	36.0789	665.95	454.433	109.21	64.778	58.1179	54.1326	46.8988	43.6499	38.5292	30.9662	31.0926	29.2949	570.946	610.47	127.182	65.9603	53.4206	47.1234
1822	9	1	0.1	5029.97	3882.83	9342.53	4008.32	2426.98	1761.24	1372.36	1224.39	1108.99	1032.1	1004.23	1263.23	1301.09	4327.97	2719.1	3073.37	1418.71	1533.51	812.499	641.605	565.279	471.354	457.757	1139.95	5206.33	6407.48	4980.94	2017.33	1640.1	1424.67	1307.24	1256.09	1133.54	1093.34	1313.47	6043.92	2940.07	4809.41	3962.66	4634.94	3438.95	1981.11	1340.93	1149.2	981.563	947.944
972	8	1.5	0.4	72.9719	131.552	291.752	822.236	134.451	100.503	74.7122	52.1139	29.1096	22.0346	13.9478	12.2268	11.5183	9.89252	10.5613	10.2192	43.6661	65.7056	31.0572	19.3053	12.3499	10.8147	9.77321	10.3544	10.3326	14.1561	53.5561	44.2441	39.589	39.3332	35.2177	23.269	12.9681	11.5577	10.1985	10.0029	9.7131	10.1427	31.7066	208.283	144.958	90.0973	71.7966	27.8154	15.2167	11.4994
613	3	0.3	4	113.927	256.528	327.214	633.514	1283.11	852.412	310.34	44.0712	40.2571	43.3569	66.7997	133.165	113.545	90.3519	180.176	389.349	298.134	95.8479	41.9238	35.4154	31.1897	31.0341	29.9488	30.5611	30.7298	32.3704	95.4054	342.786	664.201	223.196	47.6933	36.0302	31.8083	31.7855	32.9611	40.9031	41.889	41.8037	350.991	503.529	638.997	524.033	60.4653	41.4887	35.4505	35.0174
1086	1	1	4	5.2723	5.70569	2.47087	0.532148	0.375492	0.166998	0.16963	0.167294	0.160083	0.186389	0.320581	0.443005	0.422167	0.376094	0.479943	0.455883	0.299882	0.148021	0.151043	0.149582	0.143073	0.253962	0.381438	0.414811	0.421923	0.404728	0.529268	0.431643	0.281637	0.13351	0.135943	0.134394	0.128669	0.17979	0.313849	0.471708	0.674817	3.24489	5.18973	6.52076	1.07022	0.161119	0.163915	0.161773	0.154129	0.258236
1295	0.4	0.1	0.1	17.032	61.4095	41.284	26.133	33.4358	16.716	17.1364	16.9003	16.1101	16.486	15.8208	16.4649	16.5285	15.38	16.8968	16.1742	16.8532	38.8489	28.075	17.2117	16.6294	17.1184	89.2064	26.9278	35.7306	28.3133	35.3823	77.8018	83.0666	23.771	17.2893	17.243	16.5461	17.0324	108.809	138.006	69.0335	140.376	119.273	28.125	105.887	23.222	21.4444	21.0548	16.7077	17.2259
1139	1.5	0.7	0.1	8.47701	6.95075	7.60389	6.79163	6.796	6.48712	6.26776	6.03576	6.57876	15.7248	9.60228	19.6458	9.10714	8.05482	31.9182	19.4003	9.89641	12.5029	8.11549	7.47405	6.9222	32.7292	34.4132	20.1735	18.3422	19.8506	21.8931	18.8645	30.1039	38.6921	32.6104	21.067	18.9324	18.3923	16.8707	18.9692	22.4519	21.155	21.8342	20.1094	16.8581	8.68694	7.67699	7.1991	6.64973	7.72037
1862	4	0.4	1	784.932	495.72	1576.05	709.631	304.712	115.125	104.741	97.916	88.7116	90.7722	96.7703	136.614	99.5718	811.49	240.044	272.154	98.8543	166.004	93.0165	84.0894	74.0908	68.5272	59.6859	115.896	769.335	1172.17	423.565	420.078	163.496	99.3036	96.8032	93.4743	85.0797	84.3911	122.185	1007.74	385.361	770.214	660.395	630.603	276.522	112.863	103.946	97.9879	89.8615	87.5062
629	6	1.5	0.3	1918.29	4522.71	3914.92	2038.67	3215.97	4753.57	2172.59	1753.7	1636.14	1774.9	1700.27	1779.69	1713.15	1601.11	1725.83	1635.43	1640.66	1622.34	1635.46	1609.45	1557.25	1628.85	1556.85	1634.39	1638.89	1492.26	1645.1	1500.35	1505.17	1487.16	1558.67	1447.9	1271.38	1355.47	1290.42	1523.19	1349.68	1303.7	1532.74	1255.07	1247.68	1226.98	1290.65	1570.57	1371.26	1449.63
1000	3	0.7	0.1	23.6622	29.4146	38.6825	34.0927	27.4885	23.5801	22.6708	21.1285	19.1946	19.1061	20.9549	30.0646	23.445	26.1922	32.1238	22.4067	34.7178	52.0754	37.1428	27.32	24.7367	24.7154	32.3074	44.6242	41.5997	134.415	36.891	28.1965	26.2061	31.243	27.2813	25.1721	25.2717	23.42	22.4064	139.5	31.4698	26.5976	26.7226	146.876	59.1833	27.6797	26.1065	24.5105	22.4357	49.1383
7306	0.2	0.1	0.1	7468.62	6265.24	15257.2	6849.31	4269.38	2533.15	2004.22	1687.77	1468.51	1600.79	1444.67	1655.31	1898.4	6056.41	4123.5	4318.09	2017.29	1959.7	1177.76	971.198	773.539	736.948	659.499	1721.76	9610.26	9057.67	6788.11	3712.43	2556.38	1988.53	1761.15	1674.96	1470.24	1361.23	1442.19	8966.14	5296.09	7307.26	5792.33	8015.88	6595.45	3005.97	2021.39	1623.92	1344.17	1224.39
991	0.8	1.5	1.5	72.4061	116.25	183.223	185.913	71.0477	49.619	34.6987	25.8892	18.173	17.7288	10.9996	21.1466	9.36666	11.2606	24.7528	13.2155	39.3928	72.1698	42.668	53.9072	35.1007	38.1835	161.654	109.75	80.0281	136.541	114.099	60.8901	90.0412	196.388	72.8793	55.2458	37.6213	29.9262	22.7327	20.2916	15.5197	44.9844	62.0267	377.027	134.919	99.5883	64.6661	43.0646	30.6809	31.0185
7317	0.4	0.1	0.1	62.1927	146.042	393.992	66.2574	65.6677	32.7237	33.6942	33.3064	31.6883	32.0999	30.3668	30.7669	30.2917	30.3205	42.9297	47.8286	33.787	32.534	33.1764	32.4898	30.6874	30.7929	29.0463	30.8884	261.044	163.866	92.6434	63.0161	35.4821	32.6195	33.3667	33.0117	31.5975	32.117	30.5681	217.078	91.4869	162.477	62.852	233.132	249.121	46.5461	34.5908	33.6607	32.2587	32.8997
998	1.5	1	0.2	143.67	150.053	140.512	252.524	711.137	394.045	218.113	150.512	148.727	153.788	143.08	141.129	135.207	117.75	135.104	137.167	118.483	21.7563	14.2345	0.804285	0.227763	5.59125	11.8724	11.6222	11.3753	10.6654	14.2171	13.595	10.6139	7.50641	17.4578	20.4145	20.6424	21.8515	21.765	62.4331	78.5361	49.6535	118.808	173.316	175.014	141.582	59.945	25.9681	35.9235	111.714
1716	8	0.5	0.1	40.4542	41.2246	205.486	57.0534	43.0476	38.7448	37.6361	35.2213	31.8921	31.2339	29.2007	33.2573	33.547	44.2918	45.0908	36.7678	191.011	61.9719	40.6135	37.9658	34.9883	34.1339	31.9123	33.2566	217.363	325.436	117.379	46.8314	41.5397	40.3732	38.9515	36.3496	33.3327	33.2777	31.0614	516.645	75.8345	103.058	96.7289	228.052	394.862	123.294	42.4562	38.3694	35.4787	129.349
1896	8	0.9	0.5	458.891	442.161	1208.93	666.967	281.142	299.725	269.275	242.33	222.568	254.194	223.306	206.934	177.419	442.319	459.295	281.325	245.34	236.029	185.515	169.279	131.825	137.643	116.999	164.685	377.128	737.984	365.351	522.547	344.994	250.445	245.789	240.319	160.675	194.384	163.417	372.566	566.577	375.612	588.122	447.602	370.859	264.924	249.381	234.776	230.36	201.948
1883	5	0.2	0.1	297.193	206.528	449.195	154.307	72.3191	42.3783	27.4966	14.6796	24.7266	13.9659	24.3444	37.4517	26.6662	325.521	63.3675	42.2824	26.5472	13.886	13.8473	13.5463	12.7034	12.7143	12.107	12.6154	337.376	322.892	122.125	114.865	50.8795	40.3445	26.471	25.6006	13.3552	13.5411	12.95	94.5863	237.47	271.567	290.864	267.481	52.2059	41.8583	27.7955	26.3195	24.9941	13.7492
1285	1	1.5	0.4	15.9905	12.0293	14.1297	15.2111	30.0184	27.4203	14.4891	13.2855	11.7908	11.3528	8.37623	18.2206	9.66286	14.4452	19.6273	10.4116	9.11697	72.9239	49.0357	15.8893	9.25733	7.32173	7.28885	5.9981	5.0109	4.86834	4.56907	4.85159	17.3578	6.12017	3.94645	3.34009	2.99202	2.90121	2.67789	4.25196	8.61798	35.2211	44.2991	21.4112	13.7724	8.25558	5.24585	4.89531	3.53195	3.67463
1266	9	0.4	0.1	6.52266	24.5081	13.0455	12.5232	24.458	7.73979	7.13876	6.90104	6.43305	6.43912	6.07298	6.15453	6.03382	5.38198	5.9846	5.87621	6.0899	5.98136	6.5204	6.51983	6.1732	6.24988	6.06074	6.32563	6.32283	5.75791	6.48716	6.36107	7.00599	6.94474	6.89175	6.6264	6.15864	6.16189	5.84484	26.6162	18.9079	80.4917	46.7136	16.5679	50.8051	9.63346	7.22955	11.846	6.58712	6.6
1176	3	0.6	0.1	107.132	53.5144	15.4823	14.3704	15.0528	17.0839	20.4692	21.7848	30.6587	160.503	112.868	141.92	113.592	81.3461	49.9533	22.7234	20.473	27.7132	30.5357	21.5733	18.5756	50.3213	22.4483	18.0543	17.4005	17.5237	19.0872	16.9889	82.7906	133.523	113.754	47.9037	32.4861	20.6979	17.8405	17.5144	21.1745	81.6467	26.1324	22.24	19.092	28.3899	34.0624	28.6256	19.7354	62.8072
924	2	1	0.6	31.448	17.0558	35.0688	39.4912	20.4224	27.9482	17.0772	11.9575	22.2238	14.4821	17.4337	38.9151	37.1699	29.9857	43.5816	29.286	28.322	24.104	48.921	60.3197	23.1361	21.4462	21.5434	25.1741	20.409	32.017	81.1463	52.9388	41.7844	47.5674	43.057	41.6872	32.6902	31.9345	35.4278	69.2041	36.8495	58.0878	61.6929	107.249	38.8567	30.6541	28.4748	26.0157	23.7121	23.5723
758	7	2	8	108.393	80.5143	85.9968	81.9936	60.9517	68.3301	61.8757	100.368	58.9785	75.2764	60.9103	63.7556	64.5216	59.8662	64.5055	76.9939	63.7271	69.0156	46.7485	55.3497	55.3204	70.0541	46.4973	49.6693	63.4319	49.2176	64.1746	51.8041	74.341	73.4416	82.6073	67.0459	76.3579	95.1169	85.919	74.3391	74.821	69.2237	72.6669	68.5405	65.0461	73.18	87.1682	57.6442	67.2095	69.7525
1257	10	3	0.1	0	0	0	0	0	0	0	0	0	0	0	0	0	0	0	0	0	0	0	0	0	0	0	0	0	0	0	0	0	0	0	0	0	0	0	0	0	0	0	0	0	0	0	0	0	0
895	0.6	0.1	0.1	2938.84	2670.25	3020.29	3132.23	3056.37	2886.13	2874.98	2410.18	2212.44	2297.28	2226.46	2300.92	2296.46	2072.56	2289.82	2214.07	2277.24	2182.82	2248.27	2035.09	1920.72	1993.09	1933.46	2002.87	2004.25	1935.5	2098.38	2191.19	2280.55	2338.39	2226.12	2359.38	2330.08	2467.08	2434.38	2481.86	2528.67	2288.87	2742.83	3249.68	3452.83	2894.4	2818.17	2783.32	2640.81	2691.04
1317	1.5	9	0.1	2.52717	1.7003	1.86605	1.80411	47.3132	4.89566	2.04833	230.745	29.3428	13.1201	10.3498	28.3519	11.1624	8.86656	2.19592	2.03703	24.1656	89.1613	24.8219	21.733	11.2879	54.1055	18.5388	10.5643	9.63429	16.6694	10.2152	2.38909	9.29837	2.27274	2.27288	2.18089	2.0122	2.08054	2.0637	2.18754	2.12708	7.48298	1.95405	1.85323	1.82049	1.70382	1.8855	1.99409	1.77108	1.86153
1242	0.1	0.3	0.1	3.36385	2.94904	2.95909	2.84376	2.89062	2.71126	2.6352	2.43543	226.958	199.534	46.2621	49.8173	48.2243	37.6049	33.845	27.9754	7.61907	2.81907	2.79653	2.83506	2.90661	2.98078	2.83755	2.94292	4.16755	5.73408	3.01708	2.85016	2.89944	2.68354	2.53637	2.30214	2.61617	6.1897	5.84588	6.45884	5.17093	65.0035	19.8489	31.2009	2.94481	2.74522	2.61156	2.33543	2.09028	2.178
107	0.6	1	0.8	62.9453	40.6445	49.2293	60.8077	39.0531	37.0843	36.1726	32.0577	40.4053	43.0612	37.8324	51.6484	60.9399	70.5661	76.0342	59.958	47.6248	40.6595	36.387	28.2655	22.0324	20.5725	27.1891	97.6768	116.406	237.037	136.606	87.3384	39.5106	37.6302	37.8157	35.0339	31.4294	30.7582	28.4917	45.1678	145.852	285.033	216.283	63.0992	51.3856	37.6856	38.03	35.7419	32.5221	31.964
1841	3	0.3	0.1	164.077	166.714	309.574	253.082	118.715	36.6626	27.7533	21.5435	15.5409	15.7245	14.8974	15.7614	15.4926	164.731	65.4651	75.9572	21.8961	31.4745	15.8926	15.2528	14.3376	14.2669	13.458	15.0057	214.695	223.081	247.232	76.2241	36.1855	21.4836	16.2645	15.9382	14.9239	14.9536	25.2363	255.529	85.8306	138.759	85.7513	126.415	102.728	46.003	28.0504	16.6648	20.2466	15.5089
907	1.5	3	4	291.303	198.564	289.708	237.706	167.526	109.358	86.6514	73.5271	91.334	89.0729	69.4159	75.246	59.8043	85.2419	80.1357	114.788	67.5284	72.4958	59.1646	69.2883	70.5084	69.073	72.0268	73.6381	58.1747	145.108	535.083	377.634	440.349	352.615	252.203	161.857	136.308	133.891	207.583	387.846	276.457	451.452	667.872	854.353	533.895	290.123	291.118	182.723	134.085	213.622
80	0.7	1.5	0.2	331.149	244.762	317.355	222.131	135.159	126.609	129.185	149.775	24.904	17.9174	167.201	275.211	259.617	196.255	153.696	162.708	136.225	172.243	123.414	155.564	91.8945	106.083	169.349	301.174	325.816	559.628	352.711	342.673	143.152	126.734	118.916	174.901	73.4878	108.428	199.378	311.104	323.534	526.658	468.688	179.846	176.293	129.99	133.114	128.531	170.09	25.5002
1236	0.7	0.2	1	6.61313	4.8905	5.52327	5.26899	5.33526	5.5235	5.3512	4.33479	3.45788	3.38704	3.14665	4.50371	7.02741	6.2571	7.83601	9.72542	9.61468	8.52705	8.07268	6.48108	5.04719	19.5786	20.9647	11.9594	10.9032	9.82373	11.7972	11.5163	11.0187	13.5806	18.8421	11.17	7.05795	6.71178	5.7745	4.84495	4.6105	5.19278	7.33573	8.95806	8.07485	5.71393	4.1608	3.42028	2.48686	2.33929
981	10	1.5	0.2	122.101	128.306	154.238	644.118	158.361	120.395	117.609	110.052	107.627	110.464	101.033	108.861	104.435	94.5275	107.761	99.2482	111.834	83.9481	21.9502	14.4304	12.0866	12.0641	13.3611	15.5488	15.6572	33.3513	33.057	18.7668	22.1849	23.2831	40.1518	37.5092	36.2364	36.0242	33.2116	35.4474	35.3169	46.8882	55.2348	85.8807	52.7252	43.7703	69.4156	64.2056	62.4993	65.0111
1093	8	10	10	23.3729	21.9337	33.9496	32.9657	32.6341	32.6207	23.5155	14.7994	9.63669	10.2138	13.1531	21.0675	25.8027	32.3214	55.3269	38.7039	45.8178	138.487	41.2858	32.2789	22.005	18.9676	21.5493	23.2969	95.4603	184.039	78.1981	35.91	44.2088	129.075	42.5388	31.6998	21.8867	18.7356	16.6698	153.229	68.9216	49.8229	64.755	46.5795	217.841	39.3726	34.5806	22.7207	15.969	13.5717
1709	0.9	0.8	0.8	56.0292	59.0974	100.126	110.904	62.2771	56.0626	56.9362	55.2325	50.7345	48.3648	42.0897	39.4955	38.1428	46.501	64.6169	60.2824	59.9641	59.9357	57.8305	54.8922	50.0881	49.1677	46.8084	49.1894	61.245	86.4428	183.193	63.2432	57.6105	58.2843	57.9301	56.5694	51.852	49.7936	46.2554	52.776	52.7881	55.4393	63.0492	59.916	124.008	68.5802	57.3954	55.3364	49.9738	47.8805
1017	1	1.5	1.5	24.679	45.7173	121.127	37.4762	18.443	10.1352	8.19426	5.90945	5.04466	3.68972	3.33707	2.812	3.24637	20.7112	18.7409	9.7059	30.8093	70.7382	19.1396	10.2956	6.21184	5.70767	5.87251	10.1178	50.9423	207.395	181.061	52.1268	20.986	14.7701	10.7225	15.9107	44.4134	24.1041	29.2074	249.155	142.15	76.622	80.559	117.871	154.206	71.9525	52.5809	42.9546	33.935	28.927
1194	2	0.2	0.1	10.2273	14.3685	14.3501	12.6898	10.3789	5.16549	3.19829	3.07683	2.89145	7.01559	10.0087	12.1756	10.451	7.82846	10.9729	10.1778	10.1554	7.03311	4.19573	3.1377	3.85776	41.8287	55.8572	42.1184	40.0642	38.6511	42.7863	32.378	44.0947	57.6382	50.0818	21.3972	13.7844	12.9875	10.2776	10.0541	8.01133	8.59149	9.97608	9.05588	9.07713	6.95564	4.13584	4.01212	2.93632	3.84348
[truncated: 434 more columns]

## Sheet: Storage(WG inflow-No Demand)
grand_id	q1	q2	q3	1980-01	1980-02	1980-03	1980-04	1980-05	1980-06	1980-07	1980-08	1980-09	1980-10	1980-11	1980-12	1981-01	1981-02	1981-03	1981-04	1981-05	1981-06	1981-07	1981-08	1981-09	1981-10	1981-11	1981-12	1982-01	1982-02	1982-03	1982-04	1982-05	1982-06	1982-07	1982-08	1982-09	1982-10	1982-11	1982-12	1983-01	1983-02	1983-03	1983-04	1983-05	1983-06	1983-07	1983-08	1983-09	1983-10
610	0.7	0.9	0.1	36700	36700	36700	36700	36700	36700	36700	36700	36700	36700	36700	36700	36700	36700	36700	36700	36700	36700	36689.4	36561.3	36428	36320.5	36233.1	36156.9	36098.2	36326.8	36700	36697.9	36613.3	36433.8	36215.8	35963.3	35760.2	35588.7	35455.1	35543.7	35922.6	36495.9	36700	36700	36692.1	36572.5	36426.3	36641	36700	36700
753	1.5	0.9	0.9	20082.1	20327.8	20597.5	21017.7	21087.7	21079.2	20983.3	20532.6	20197.7	20023.1	19939.6	19860.6	19882.7	19869.7	19878.4	19960.6	20221.8	21138.5	20939.7	20515.9	20098.5	19846	19715.3	19560.9	19520.8	19484.6	19610.7	20767.6	21752.5	21957.8	21618	20965	20813.5	20969.2	21088.5	21085.6	21082	21082.1	21082.6	21079.4	21092.5	21441.4	20985.1	20587.8	20262.2	20182.7
870	1.5	0.9	0.7	20295.6	20293.6	20292.8	20290.7	20297.6	20293.2	20228	20136.5	20095.5	20141.6	20281	20298.3	20296.5	20293.1	20295.3	20287.9	20289.5	20265.3	20160.5	19898.7	19565.2	19350.2	19188.3	19084.3	18971.8	18836.5	18763.6	20013.7	20489.2	20287.6	20288.4	20287.8	20293.8	20290.6	20291.2	20291.6	20291.1	20294.2	20291.4	20288.8	20288.8	20286.2	20296.3	20292.1	20290.7	20290.9
597	1	0.7	0.9	21132.8	21733.2	23645.1	24903.7	25070	25070	24856.7	23887.4	22943.1	22304.8	21885.4	21469.1	20970.1	20343.9	19611	19049.9	19281.9	19271.5	18350.3	17261.1	16424.1	15758.1	15401.8	15152.8	14871.2	14595	14790.4	15419.9	16641.5	17900.3	17505.4	16814.3	16323.7	16117.2	16114.2	16226.4	16308.5	16549.7	17452.2	18748.3	20127.6	23238.3	24402.6	23870.9	23136	22591.4
307	0.5	0.6	0.2	17350.7	17200.7	17120.2	17221.2	17371.5	17454	17370.3	16898.5	16599.1	16454.3	16359.9	16269.1	16186.5	16098.9	16116.2	16409.7	17172.9	19200.1	19274.3	18907.9	18576.3	18458.5	18502.2	18561.3	18615.1	18675.5	19194.6	20580.3	22110.7	23489	23559.2	23482.5	23381.1	23427.8	23556.2	23560	23560	23560	23560	23560	23560	23529.3	23303.5	22850.8	22389.4	22218.4
1753	3	0.1	0.1	5064.95	5019.54	5654.05	6108.54	4998.84	5025.03	5056.19	5088.59	5069.88	5069.38	5100.38	5070.25	5093.79	5010.39	5002.47	5043.85	5048.21	5072	5084.32	5082.23	5080.88	5111.99	5078.9	5084.32	5060.41	4892.36	4924.41	5023.98	5011.83	5074.57	5065.99	5083.61	5084.19	5072.01	5085.48	5045.94	4956.68	4963.08	4929.68	5099.23	5035.81	5004.32	5064.02	5073.1	5092.4	5078.26
297	4	10	1	1431.17	1205.59	1161.11	1360.19	2498.37	2442.34	2013.63	1929.97	1923.29	1788.43	1738.67	1549.4	1601.19	1511.37	1440.85	1439.17	2142.1	2642.6	2612.06	2053.36	1811.34	1780.38	1589.51	1480.09	1293.42	1215.53	1181.86	1125.02	1621.49	2300.19	2320.5	1956.09	2001.26	1994.04	1776.15	1612.96	1496.85	1373.14	1376.29	1368.91	1727.56	2107.53	2238.27	1952.59	1831.59	1641.86
1036	8	1	0.8	2168.92	2302.18	2398.65	2527.78	2542.7	2501.41	2408.29	2322.98	2245.72	2184.28	2133.55	2111.42	2055.94	2053.12	2028.28	1983.92	1970.04	1965.8	1916.79	1864.69	1814.55	1771.82	1806.22	1773.52	1793.36	2148.43	2106.38	2028.3	1974.76	2034.77	2132.38	2185.21	2248.17	2288.75	2356.42	3063.37	2986.88	2965.5	2925.85	2961.86	3152.62	3049.32	2971.26	2883.27	2798.34	2731.81
989	2	2	0.9	915.567	1023.78	1396.74	1732.61	1510.75	1409.1	1285.9	1175.74	1090.62	996.78	934.605	918.071	855.222	837.641	866.322	796.242	873.263	1545.04	2046.13	1812.16	1702.73	1608.1	1888.96	1876.04	1896.5	2424.71	2340.54	2307.49	2277.39	2517.23	2431.41	2343.39	2329.62	2176.83	2052.28	2415.03	2349.75	2390.12	2434.7	3121.75	2483.69	2383.24	2267	2123.73	1976.29	1949.84
1135	0.5	1.5	0.7	2077.75	2034.85	2000.32	1931.12	1904.01	1979.81	1871.91	1768.16	1690.57	1910.02	1860.04	2017.33	1976.2	1925.53	2050.49	2037.23	2045.75	2149.67	2105.18	2038.58	1982.18	2535.63	2505.86	2484.77	2479.43	2561.09	2543.59	2546.26	2818.15	3256.42	2791.93	2542.4	2546.3	2544.91	2534.78	2545.33	2545.8	2596.73	2540.68	2541.75	2559.73	2542.57	2525.8	2460.5	2382.71	2570.94
1269	0.9	0.3	0.1	4744.07	5223.56	5395.72	5842.42	6259.87	6248.56	6044.43	5761.17	5440.21	5163.23	4934.32	4712.25	4482.77	4393.88	4393.14	4390.04	4388.9	4486.97	4428.2	4367.19	4385.09	4374.73	4393.23	4393.85	4393.86	4410.27	4393.22	4469.3	4649.27	4482.01	4391.74	4386.32	4357.63	4373.58	4399.7	5017.27	6032.09	6255.4	6287.7	6285.42	6263.29	6279	6178.02	5972.81	5713.01	5433.03
1077	10	0.6	0.4	2575.78	2625.59	2683.89	2699.17	2887.99	3126.84	3052.84	2951.57	2841.38	2752.86	2653.45	2586.73	2491.99	2409.22	2394.99	2353.07	2296.11	2296.13	2233.67	2154.61	2084.26	2129.43	2624.24	2774.21	2788.51	3155.11	3191.52	3269.25	3220.76	3141.89	3207.57	3200.57	3210.49	3180.88	3129.87	3201.38	3170.75	3205.7	3219.41	3199.3	3225.66	3207.2	3228.05	3196.82	3123.93	3108.26
1026	0.8	0.5	0.1	2781.1	2928.17	3018.58	3108.15	3013.44	2974.7	2939.23	2864.8	2790.09	2718.71	2673.31	2758.18	2741.08	2816.79	2896.86	2896.68	2951.07	3059.7	3017.15	2983.13	2955.67	2936.47	3123.69	3045.93	3030.95	3725.52	3928.54	3794.47	3617.01	3474.61	3333.1	3173.61	3081.3	2953.07	2912.97	4155.94	4207.81	4244.98	4146.18	4199.23	4264.97	4176.06	4026.64	3844.7	3658.35	3540.73
740	9	2	0.1	2067.02	2084	2077.97	2028.37	1922.95	1825.22	1754.29	1742.48	1816.64	1837.02	1867.95	1890.25	1891.89	1886.94	1864.11	1835.09	1784.66	1816.3	1826.64	1792.98	1805.11	1878.69	1892.74	1922.18	1963.27	1987.78	1976.72	1954.16	1916.74	1887.41	1870.53	1854.34	1833.6	1940.77	1975.6	1987.35	1988.98	1979.91	1986.25	1954.09	1882.42	1846.79	1824.73	1782.89	1852.91	1921.52
1294	2	0.3	0.1	2768.72	2757.52	2744.46	2734.05	2738.6	2748.49	2731.27	2700.35	2683.23	2700.45	2711.08	2769.89	2777.31	2777.26	2782.67	2775.16	2776.14	2879.43	2794.5	2775.79	2776.58	2777.06	2775.68	2776.47	2776.05	2776.39	2776.89	2776.57	2777.46	2777.35	2777.23	2777.8	2777.76	2777.45	2777.84	2777.5	2777.33	2778.78	2776.6	2776.22	2777.25	2776.63	2777.43	2777.22	2778	2778.41
1848	1	1	0.1	3067.56	3109.23	3377.58	3705.24	3645.8	3524.81	3392.31	3256.85	3122.4	3008.72	2985.09	3050.35	2967.19	3029.1	3004.03	3024.37	2924.23	2862.73	2770.66	2661.44	2561.93	2463.85	2376.36	2310.65	2433.31	2540.81	2563.79	2676.47	2635.83	2542.67	2445.63	2356.19	2266.04	2185.76	2131.78	2623.6	2973.49	3092.66	3144.08	3304.24	3511.12	3631.91	3513.84	3377.92	3244.75	3124.7
1869	2	1.5	0.7	1308.25	1376.67	1707.1	2150.86	1880.84	1665.21	1493.26	1342.5	1272.16	1233.12	1194.29	1172.24	1147.8	1194.77	1291.44	1311.92	1272.49	1233.04	1183.36	1122.62	1070.44	1022.01	978.622	939.685	973.742	1176.32	1251.52	1470.34	1371.84	1256.33	1210.42	1163.9	1118.98	1079.11	1040.91	1777.53	2112.62	2207.86	2171.12	2339.53	2331.99	2252.02	2001.22	1794.11	1604.5	1443.99
1863	1	1	0.1	2819.96	2998.68	3121.35	3142.26	3118.33	3098.98	3041.53	2957.17	2869.77	2809.46	2766.37	2722.11	2661.61	2751.36	2783.16	2748.29	2673.3	2606.61	2519.62	2434.83	2355.51	2274.76	2205.31	2151.44	2371.7	2626.07	2731.75	2717.24	2736.54	2668.24	2595.74	2525.52	2447.52	2385.02	2338.64	2467.12	2588.64	2737.24	2823.68	2996	2989.9	2944.07	2870.74	2785.68	2711.52	2635.67
1770	0.8	0.1	0.1	2747.37	2898.59	3086.62	3147.5	3136.36	3092.58	3030.24	2957.94	2885.07	2812.23	2741.73	2682.38	2633.96	2710.93	2808.1	2821.77	2809.69	2799.05	2760.04	2698.2	2637.27	2573.14	2518.82	2534.54	2721.19	2999.68	3135.46	3143.42	3108.87	3056.58	2989.98	2922.03	2857.33	2784.3	2719.24	2858.8	2998.39	3094.97	3145.55	3146.15	3146.89	3136.04	3083.61	3015.36	2945.84	2876.95
965	6	1.5	0.9	927.863	959.723	1026.52	1174.48	1086.72	1081.27	1046.59	1010.33	984.194	957.738	937.436	916.533	895.538	874.655	863.63	850.675	847.158	835.865	798.012	789.687	776.588	755.678	740.806	753.551	730.154	769.744	893.932	923.529	1025.12	1095.36	1093.03	1080.88	1070.34	1056.93	1039.42	1023.66	1021.32	1046.57	1105.76	1351.48	1179.73	1140.39	1098.23	1054.26	1027.82	1006.94
1247	2	0.8	0.5	1765.39	1736.34	1708.43	1670.3	1646.27	1627.06	1570.7	1507.98	1458.89	1756.19	1732.5	1847.77	1790.44	1784.68	1803.36	1801.56	1802.07	1786.89	1770.05	1752.21	1733.81	2053.75	2306.54	2171.7	2036.67	1940.38	1834.43	1806.81	1895.49	1943.94	1878.94	1807.1	1807.24	1804.5	1799.61	1795.31	1799.44	1807.17	1807.3	1807.71	1804.37	1806.87	1789.32	1756.88	1723.04	1689.77
7313	0.5	1	0.1	2520.91	2529.9	2529.9	2529.9	2529.9	2529.9	2505.91	2332.44	2205.25	2269.43	2366.26	2466.31	2529.64	2529.9	2529.9	2529.9	2529.9	2529.9	2492.48	2275.68	2052.64	1972.87	2030.53	2141.15	2291.54	2407.22	2529.9	2529.9	2529.9	2529.9	2524.23	2424.92	2310.13	2415.42	2526.31	2529.9	2529.9	2529.9	2529.9	2529.9	2529.9	2529.9	2528.16	2438.06	2335.19	2366.06
1287	4	8	0.7	951.349	950.011	903.106	937.322	953.142	975.879	948.866	895.101	831.577	897.888	886.193	879.311	866.495	828.735	834.488	846.92	854.4	904.223	856.693	843.597	860.27	879.919	927.978	895.076	883.209	906.709	913.766	955.809	928.405	840.464	905.691	961.883	975.11	982.063	977.222	886.67	936.874	916.667	878.785	937.06	910.996	861.663	895.567	907.322	905.061	870.538
1186	10	0.4	0.1	1678.48	1705.58	1712.37	1711.42	1707.2	1719.36	1718.18	1703.19	1683	1670.99	1661.47	1654.21	1643.18	1632.83	1625.33	1617.52	1619.06	1703.74	1718.38	1713.73	1708.96	1704.76	1712.49	1717.44	1718.64	1709.11	1713.9	1713.93	1704.02	1701.41	1688.22	1665.55	1638.19	1616.97	1603.2	1706.11	1703.17	1707.52	1711.7	1720.43	1705.52	1716.22	1711.22	1692.23	1668.2	1646.26
1042	1.5	0.5	0.1	1481.95	1513.1	1543.86	1576.13	1573.47	1562.35	1542.08	1519.35	1496.38	1478.9	1466.39	1455.8	1442.45	1443.34	1443.4	1440.25	1438.21	1451.8	1440.28	1423.22	1405.58	1392.66	1391.79	1385.68	1404.46	1569.73	1629.01	1620.97	1609.75	1611.15	1598.27	1577.52	1559.15	1542.22	1535.46	1787.24	1778.66	1730.73	1709.44	1721.61	1729.52	1704.79	1696.52	1676.98	1657.6	1656.68
884	3	0.2	0.1	1527.24	1521.54	1526.79	1522.4	1528.04	1524.29	1521.2	1525.9	1532.85	1534.51	1529.64	1531.63	1536.89	1524.47	1532.98	1526.63	1528.2	1538.83	1530.43	1538.61	1537.83	1535.81	1539.05	1535.28	1536.57	1533.13	1539.79	1533.4	1535.27	1531.48	1533.54	1527.24	1534.4	1528.75	1537.42	1531.87	1533.15	1525.85	1532.45	1525.99	1535.48	1528.74	1527.02	1518.56	1537.03	1535.07
1273	4	1	1.5	231.264	231.497	230.74	230.84	239.428	231.423	230.87	229.731	229.177	231.316	231.707	245.355	230.66	230.737	235.794	230.322	230.571	237.388	230.108	230.878	231.052	253.05	230.974	230.49	230.724	232.234	231.003	229.916	268.119	230.076	229.6	230.222	230.592	230.722	230.894	230.889	231.119	231.892	230.389	229.971	230.419	230.576	230.818	230.995	231.115	231.169
961	0.1	1.5	0.4	0	0	0	0	0	0	0	0	0	0	0	0	0	0	0	0	0	0	0	0	0	0	0	0	0	0	0	0	0	0	0	0	0	0	0	0	25.8422	68.0898	114.374	238.496	287.119	314.329	327.02	333.429	339.189	346.75
1144	4	0.5	0.1	1493.8	1478.47	1493.21	1496.21	1504.84	1512.81	1522.98	1350.95	1180.24	1458.41	1506.16	1515.86	1467.81	1508.51	1492.06	1474.8	1486.74	1501.75	1489.76	1455.13	1457.95	1462.96	1442.13	1463.24	1518.42	1464.07	1473.76	1498.3	1471.16	1435.43	1478.16	1477.38	1497.17	1493.64	1522.81	1528.72	1453.02	1495.22	1460.89	1485.19	1484.27	1481.76	1497.64	1486.3	1520.08	1543.96
616	10	0.6	1	1334.5	1259.84	1177.45	1206	1280.87	1203.43	1223.81	1284.52	1325.42	1324.61	1330.73	1315.67	1306.63	1308.75	1332.8	1336.28	1300.13	1320.04	1332.84	1289.5	1347.15	1319.46	1310.59	1337.9	1334.44	1300.61	1350.5	1309.24	1332	1321.35	1321.77	1332.06	1332.01	1359.9	1364.5	1316.38	1330.01	1349.87	1359.18	1359.81	1330.73	1341.29	1328.94	1334.55	1349.36	1362.05
911	0.6	0.8	10	82.2965	34.5422	68.7484	129.109	12.1952	22.4482	0.189617	0.220904	7.40513	0.372336	0.337039	3.82249	2.338	13.4394	25.3013	12.3305	2.58107	1.81535	16.0442	13.9469	6.21225	1.33341	9.94978	32.8705	12.8809	29.5525	33.0053	50.5001	59.884	30.3069	3.06124	0.0438009	2.1384	6.50619	88.7853	36.7802	4.8245	29.7158	26.3646	23.0859	0.0117873	1.56784	73.951	0	0	6.75238
1006	1.5	0.5	0.1	1263.13	1295.02	1333.25	1371.13	1368.49	1358.01	1335.75	1310.36	1288.22	1270.47	1260.94	1256.53	1244.57	1249.8	1257.77	1250.68	1266.7	1332.49	1366.94	1363.21	1353.53	1352.88	1430.28	1439.27	1448.55	1515.24	1467.79	1441.9	1436.58	1443.57	1426.71	1423.9	1437.25	1420.88	1416.23	1534.16	1466.74	1441.92	1439.14	1488.4	1521.41	1456.85	1436.65	1418.25	1399.85	1436.73
1048	10	1	0.6	815.056	892.751	1072.83	1280.34	1254.8	1259.56	1232.2	1097.17	956.828	832.77	812.689	812.534	812.917	813.175	812.916	812.183	802.721	812.487	780.097	730.96	685.025	646.332	758.514	812.177	814.505	1038.57	1044.41	899.731	993.452	1281.17	1186.13	1058.11	917.286	815.865	813.116	814.796	810.752	833.8	845.33	1192.55	1121.16	1356.56	1385.33	1288.05	1156.64	1092.49
1123	1.5	0.1	0.1	1389.71	1394.01	1381.9	1381.97	1382.29	1381.66	1380.8	1379.92	1382.4	1418.01	1382.77	1397.25	1383.62	1384.56	1384.06	1381.92	1384.88	1398.63	1381.82	1382.14	1381.83	1382.36	1382.48	1383.01	1388.62	1436	1403.26	1381.86	1426.45	1452.99	1396.98	1381.9	1382.06	1381.72	1382.43	1482.61	1460.61	1421.96	1405.32	1383.56	1436.31	1401.18	1382.18	1381.84	1382.32	1382.21
1032	4	1.5	0.7	506.374	574.949	669.674	758.692	758.424	744.822	706.598	659.996	618.407	577.299	537.784	501.969	462.799	431.601	415.794	397.983	393.299	430.813	415.165	389.796	363.234	343.474	445.016	461.202	456.504	601.84	616.835	614.938	683.705	823.129	730.814	724.283	710.289	685.891	657.429	664.938	735.289	769.561	754.339	868.928	766.516	756.456	755.439	739.605	717.1	735.117
1774	0.9	0.2	0.1	1533.94	1807.63	1900.8	1900.8	1900.43	1867.35	1785.36	1673.5	1553.83	1433.36	1335.08	1326.15	1326.26	1376.98	1483.23	1593.49	1611.74	1677.31	1604.93	1483.2	1359.31	1326.11	1326.5	1326.11	1435.65	1879.48	1900.8	1899.68	1873.02	1798.66	1700.64	1585.69	1517.15	1413.09	1355.05	1508.87	1728.2	1897.96	1900.8	1900.8	1900.8	1891.96	1828.69	1725.38	1604.53	1478.79
1781	0.5	0.8	0.2	1420.9	1841.94	1900.8	1900.8	1900.8	1892.56	1848.71	1742.91	1616.16	1487.21	1360.14	1203.47	1052.44	1264.78	1808.65	1900.8	1885.67	1892.86	1806.66	1668.42	1523.37	1378.52	1188.79	1004.62	1196.6	1883.49	1900.8	1900.8	1900.74	1896.32	1827.62	1767.57	1669.77	1539.18	1468.5	1759.4	1900.8	1900.8	1900.8	1900.8	1900.8	1900.36	1877.36	1790.56	1673.35	1546.48
355	0.2	0.6	0.2	1760.6	1760.6	1760.6	1760.6	1760.6	1760.6	1701.16	1578.96	1512.74	1480.13	1558.25	1716.1	1760.6	1760.6	1760.6	1760.6	1760.6	1760.6	1717.95	1607.68	1524.75	1485.44	1468.54	1554.02	1661.79	1742.08	1760.6	1760.6	1760.6	1760.6	1727.82	1619.61	1544.75	1515.45	1612.96	1752.3	1760.6	1760.6	1760.6	1760.6	1760.6	1760.6	1743.66	1654.23	1634.84	1730.4
1101	1.5	0.8	0.6	1102.78	1154.99	1330.64	1579.7	1520.65	1398.33	1262.68	1160.64	1095.7	1039.05	1006.05	1054.24	1039.48	1084.48	1104.35	1145.35	1119.85	1100.65	1070.41	1020.21	970.177	920.267	875.559	834.949	830.164	927.424	985.566	1055.94	1066.43	1033.57	987.895	938.951	891.148	846.669	808.354	1174.28	1478.22	1532.49	1467.84	1540.8	1609.06	1626.48	1489.84	1340.65	1206.93	1134.92
1023	2	10	0.6	613.69	605.121	591.57	502.112	513.315	515.359	512.352	602.88	610.753	614.956	619.702	618.903	622.847	619.177	619.157	619.531	624.957	618.935	609.683	603.114	601.543	563.22	583.156	595.574	591.21	610.902	633.074	606.308	613.191	628.918	604.163	611.584	602.136	576.96	544.365	513.397	490.562	492.301	529.833	558.759	569.663	588.394	604.502	612.821	617.136	619.932
1060	0.8	1.5	0.7	439.377	456.468	480.048	508.404	491.14	481.556	464.489	444.178	427.278	416.091	405.388	429.254	416.178	429.78	449.243	445.257	465.219	491.6	479.012	476.683	468.518	464.968	528.047	522.593	530.526	612.464	565.813	552.747	540.568	553.516	547.05	526.61	508.83	492.879	487.965	666.351	580.51	599.778	582.509	588.356	628.431	582.794	566.174	547.51	530.308	517.421
1864	2	1.5	0.3	627.992	600.728	802.487	930.461	775.478	652.616	596.222	587.778	573.048	574.45	585.874	595.471	595.647	595.301	594.797	594.955	595.812	596.113	592.293	580.078	567.304	553.174	540.964	533.436	581.566	602.547	595.122	656.472	612.093	595.593	594.574	595.687	595.741	595.724	599.697	1025.04	1234.68	1225.65	1145.6	1183.89	1201.33	1149.42	965.95	830.989	712.632	618.921
1797	6	0.3	0.2	835.103	794.788	756.408	735.402	814.532	849.056	848.019	863.794	843.138	861.682	879.545	855.239	851.661	818.129	810.76	811.722	833.4	843.046	862.281	923.773	803.235	842.935	863.157	896.727	820.858	760.121	791.882	799.406	848.737	849.677	841.468	851.665	855.336	873.078	852.536	797.995	798.991	792.426	792.798	782.587	805.379	815.215	856.488	867.197	843.399	878.125
305	0.9	1.5	1	403.39	169.41	250.532	375.44	535.57	1416.39	1414.22	1100.55	571.842	407.669	465.957	518.062	385.382	264.912	306.489	420.796	500.467	462.015	165.059	119.142	124.326	273.494	274.101	436.135	148.142	545.493	1424.7	1424.7	1424.7	1424.7	1417.92	1100.93	510.521	492.489	464.29	491.792	516.793	326.132	438.532	366.103	388.495	370.537	476.21	176.672	131.317	127.522
968	5	2	0.3	563.01	563.241	566.183	701.189	598.372	560.342	562.276	562.651	562.615	562.633	562.498	562.592	562.701	562.718	562.556	562.649	577.564	562.358	562.911	562.982	562.786	562.733	562.626	562.639	562.717	562.643	562.154	562.338	564.55	560.877	561.984	562.846	563.018	563.087	563.115	563.148	563.248	563.274	567.236	587.242	562.013	561.302	561.391	562.727	562.691	562.458
1019	1.5	0.4	0.1	939.267	953.458	986.733	988.654	977.258	974.709	969.825	963.57	957.12	951.068	945.631	940.546	934.57	934.882	946.847	948.418	957.88	983.028	978.033	978.841	976.247	972.144	968.311	963.634	967.564	1022.29	1049.49	1025.04	997.665	978.78	974.815	969.658	965.832	961.111	956.651	1063.65	1104.97	1089.73	1075.24	1106.42	1158.08	1125	1093.71	1060.99	1029.35	1000.05
1302	5	2	0.7	552.795	553.859	553.949	553.667	552.768	549.886	542.06	537.239	542.746	555.544	556.99	555.643	556.398	555.499	559.05	554.75	554.783	629.897	547.975	538.829	543.009	548.498	555.623	556.109	556.202	556.101	555.196	553.855	554.275	551.468	545.336	541.514	538.317	537.289	537.446	540.042	545.213	554.427	556.513	550.036	545.096	545.757	544.254	542.697	540.678	540.679
1824	0.2	0.1	0.1	1363	1363	1363	1363	1363	1363	1363	1363	1363	1363	1363	1363	1363	1363	1363	1363	1363	1363	1363	1363	1354.2	1273.11	1169.43	1337.52	1363	1363	1363	1363	1363	1363	1363	1363	1363	1363	1363	1363	1363	1363	1363	1363	1363	1363	1363	1363	1363	1363
1316	0.2	0.1	0.1	0	0	0	0	0	0	0	0	0	0	0	0	8.42571	21.5895	42.3334	72.1674	134.633	198.443	262.138	259.887	260.277	260.332	271.715	271.098	267.069	262.251	258.922	250.657	242.656	233.433	224.477	215.133	206.88	200.443	195.244	189.22	182.94	178.036	173.427	168.431	163.186	158.867	154.333	148.103	142.142	137.979
1835	0.3	0.1	0.1	1318.6	1318.6	1318.6	1318.6	1318.6	1318.6	1318.6	1318.6	1318.6	1318.6	1318.6	1318.6	1318.6	1318.6	1318.6	1318.6	1318.6	1318.6	1303.25	1183.34	1025.66	907.082	905.419	1198.16	1318.6	1318.6	1318.6	1318.6	1318.6	1318.6	1318.6	1318.6	1318.6	1318.6	1318.6	1318.6	1318.6	1318.6	1318.6	1318.6	1318.6	1318.6	1318.6	1318.6	1318.6	1318.59
1847	0.2	0.1	0.1	1293.9	1293.9	1293.9	1293.9	1293.9	1293.9	1293.9	1293.9	1293.9	1293.9	1293.9	1293.9	1293.9	1293.9	1293.9	1293.9	1293.9	1293.9	1293.9	1293.9	1293.21	1267.05	1218.46	1288.66	1293.9	1293.9	1293.9	1293.9	1293.9	1293.9	1293.9	1293.9	1293.9	1293.9	1293.9	1293.9	1293.9	1293.9	1293.9	1293.9	1293.9	1293.9	1293.9	1293.9	1293.9	1293.9
1231	0.4	0.1	0.1	1231.68	1289	1289	1289	1289	1288.17	1279.01	1263.45	1245.43	1228.55	1212.18	1197.82	1182.46	1168.06	1154.45	1140.72	1134.98	1271.01	1289	1288.87	1287.32	1286.81	1289	1289	1289	1289	1289	1289	1289	1289	1287.85	1280.24	1266.13	1250.71	1239.17	1285.91	1289	1289	1289	1289	1289	1289	1288.9	1286.56	1279.04	1267.26
1140	1.5	0.3	0.1	931.101	926.877	921.403	915.326	910.39	905.917	899.854	896.455	894.515	894.532	893.704	895.333	894.486	893.256	893.07	891.355	889.979	889.021	886.734	884.847	883.095	881.71	880.459	879.285	878.076	876.992	875.472	873.329	873.976	877.822	882.718	880.367	878.246	876.416	874.909	874.518	875.595	892.121	894.187	893.847	891.655	890.056	887.813	885.355	883.012	931.599
1296	1	1.5	0.6	609.937	607.796	589.501	576.066	564.642	550.461	531.965	514.931	505.582	503.264	500.637	498.536	495.879	496.912	497.072	494.876	493.526	516.261	503.246	499.204	497.697	496.999	512.376	505.856	506.793	506.908	507.033	507.033	516.379	505.057	502.543	498.522	495.059	493.247	492.279	507.81	507.311	522.279	517.196	511.49	519.609	512.523	505.08	503.641	502.25	500.539
1659	1.5	0.8	0.1	683.688	687.539	729.898	747.399	744.168	738.084	726.031	714.499	703.086	690.542	678.355	668.012	658.55	674.867	676.569	679.845	705.6	714.838	708.209	703.677	734.364	725.163	719.471	714.286	720.203	785.903	910.295	896.528	884.139	882.976	875.634	863.239	849.718	836.286	828.448	875.368	881.983	885.77	894.027	906.443	905.996	891.824	880.003	869.936	857.551	853.425
1277	3	1.5	0.7	494.094	493.625	491.498	489.928	494.292	492.585	486.438	480.116	475.52	473.347	470.847	475.938	475.799	478.466	484.599	490.97	490.864	506.417	496.757	491.027	489.139	487.282	485.573	483.469	481.06	479.841	478.751	477.696	480.213	479.129	475.695	471.444	467.763	464.628	462.181	461.096	461.465	466.769	472.723	476.601	476.04	474.828	471.721	467.893	464.095	461.303
1021	0.1	0.1	0.1	1221.4	1221.4	1221.4	1221.4	1221.4	1221.4	1221.4	1221.4	1221.4	1221.4	1221.4	1221.4	1220.85	1218.65	1215.81	1208.42	1201.51	1200.31	1190.84	1179.06	1170.24	1166.22	1218.39	1221.4	1221.4	1221.4	1221.4	1221.4	1221.4	1221.4	1221.4	1221.4	1221.4	1221.4	1221.4	1221.4	1221.4	1221.4	1221.4	1221.4	1221.4	1221.4	1221.4	1221.4	1221.4	1221.4
1280	1	0.1	3	1166.54	1089.76	1013.28	935.793	863.996	828.073	787.637	745.6	883.78	1209.37	1203.14	1210.41	1211.3	1211.08	1211.3	1208.37	1191.01	1150.57	1083.72	1005.94	942.994	921.153	932.96	885.317	848.993	846.506	846.635	846.633	846.683	846.397	845.179	838.038	833.098	832.663	835.552	840.567	845.198	846.658	846.704	846.499	845.988	844.061	830.227	810.53	791.336	779.825
1120	1	2	0.5	488.881	478.887	467.193	460.957	460.964	459.363	454.831	450.745	448.105	446.884	445.857	445.711	444.354	442.672	441.512	439.203	436.952	434.489	429.808	426.324	424.11	422.915	422.213	420.783	419.117	418.641	418.068	417.253	430.882	460.146	460.69	460.878	461.046	461.074	461.119	461.139	461.19	461.215	461.163	461.125	461.14	461.033	459.534	456.109	453.052	473.779
182	8	0.1	0.7	859.194	769.667	743.958	751.658	759.45	761.415	748.83	746.247	753.908	762.223	762.006	756.726	763.21	757.567	757.487	755.377	754.898	737.474	600.259	543.775	547.747	555.966	625.265	754.215	730.259	782.693	747.581	752.595	749.029	754.865	737.529	692.115	713.351	740.764	766.043	756.389	749.752	734.97	745.369	735.82	748.367	752.575	762.543	758.08	757.857	758.361
7311	2	0.1	0.1	733.364	736.703	735.805	738.113	733.376	733.354	733.558	733.462	733.422	733.48	733.373	733.521	733.319	733.811	733.393	733.307	733.532	733.515	733.334	733.354	733.45	733.54	733.726	733.824	733.996	737.117	733.4	733.307	741.102	749.769	732.98	733.313	733.302	733.393	733.377	733.393	733.448	743.556	734.884	759.356	733.291	733.185	733.377	733.38	733.386	733.429
1755	0.8	1.5	0.3	412.155	424.49	432.802	407.445	400.78	400.688	400.628	400.714	399.183	396.011	393.484	398.233	401.021	447.639	404.376	402.313	400.679	451.376	399.86	401.039	400.794	400.681	400.856	414.781	445.549	434.223	401.905	401.03	400.985	400.739	401.118	400.962	423.085	397.563	398.602	423.155	411.032	414.11	400.601	432.188	498.465	461.718	400.74	400.813	400.95	400.805
1152	10	0.9	0.2	0	0	0	0	0	0	0	0	0	0	0	0	0	0	0	0	0	0	0	0	0	0	0	0	0	0	0	0	0	0	0	0	0	0	0	0	0	0	0	0	0	0	0	0	0	0
1192	3	0.3	0.1	641.65	640.726	639.869	640.198	640.446	641.262	641.499	642.828	642.673	643.395	643.18	643.266	642.138	643.195	642.751	643.129	643.082	642.566	641.554	642.483	643.776	642.977	643.405	643.471	643.54	642.374	641.583	642.533	642.712	642.584	643.271	644.608	642.967	644.531	644.833	663.842	649.221	646.287	638.414	641.192	642.076	641.928	642.665	643.426	643.198	643.59
541	9	1.5	0.8	131.246	126.471	120.422	114.821	497.545	358.419	206.129	176.13	162.834	153.412	147.776	141.121	132.563	123.926	115.959	161.986	359.604	317.035	268.598	238.325	210.113	190.529	177.174	163.838	153.812	142.917	132.05	136.512	525.261	404.958	293.781	265.625	253.406	238.831	224.715	210.405	194.561	179.866	166.289	155.218	374.328	406.074	235.723	210.249	193.887	180.324
1822	9	1	0.1	299.825	310.587	211.721	291.325	328.466	325.89	330.057	331.862	333.013	335.226	334.044	333.272	333.896	322.296	311.326	411.447	324.762	344.874	334.841	337.089	339.525	340.236	340.972	340.834	292.69	249.042	280.067	311.08	326.686	331.303	333.301	331.241	331.278	332.333	334.391	309.336	298.169	301.196	341.487	317.814	339.366	317.599	327.897	331.289	333.764	336.52
972	8	1.5	0.4	373.324	391.969	437.727	541.559	358.111	360.211	360.816	361.274	361.58	361.958	361.995	362.422	361.171	358.408	354.849	351.492	365.555	365.124	361.705	361.982	361.553	357.931	354.066	350.974	347.688	352.465	364.134	361.531	361.713	361.734	361.729	361.856	361.711	360.069	355.937	351.459	346.517	348.193	365.117	509.604	445.388	406.833	372.199	361.676	361.438	359.139
613	3	0.3	4	613.79	614.121	611.056	629.732	864.714	887.517	632.657	531.534	502.12	513.743	588.882	613.849	614.015	614.336	613.91	610.56	610.328	599.127	531.032	460.998	413.124	393.151	389.773	385.832	383.84	402.923	539.285	610.804	608.232	602.367	541.994	466.406	425.159	409.038	414.129	447.742	476.321	521.179	611.39	613.536	607.72	621.968	582.916	518.709	467.039	445.885
1086	1	1	4	98.2851	93.018	88.4801	87.8536	86.9397	85.5394	84.0844	82.9266	81.9975	80.9955	80.3946	80.0423	79.4442	78.87	78.5863	78.0363	77.0227	75.8187	74.8712	74.1468	73.2843	72.7018	72.2562	71.8294	71.4013	71.1142	70.8782	70.3186	69.4362	68.386	67.3861	66.6183	65.9067	65.3695	64.9507	65.0252	65.3249	72.3712	79.8368	86.2272	83.8686	82.5245	81.2511	80.1901	78.9474	78.2099
1295	0.4	0.1	0.1	838.578	871.029	872	872	871.904	869.717	860.228	847.078	834.06	825.685	817.598	815.902	815.659	831.045	834.258	829.835	834.297	863.45	870.965	864.85	863.613	859.635	871.348	871.993	872	872	871.976	871.971	872	872	871.247	867.567	858.321	854.467	861.991	872	872	872	872	872	871.988	871.865	871.016	869.72	869.184	866.572
1139	1.5	0.7	0.1	583.876	582.724	579.197	572.874	566.538	558.995	547.636	537.002	532.126	563.356	567.362	587.619	586.063	586.532	608.025	594.95	590.468	590.461	583.735	576.676	571.034	618.394	633.828	624.211	613.892	612.217	607.908	597.829	618.99	653.285	669.834	656.954	645.666	634.802	624.085	618.538	617.46	617.126	611.147	604.806	594.037	589.416	582.584	573.988	565.715	565.506
1862	4	0.4	1	583.588	556.293	683.544	584.47	554.965	548.986	568.118	553.409	524.767	510.488	535.155	555.432	548.654	619.145	544.21	552.668	536.997	545.794	511.471	478.23	439.538	396.525	357.158	312.164	557.917	607.419	546.882	557.519	567.801	551.094	541.132	526.261	498.373	474.902	487.442	561.043	531.429	581.993	559.487	551.586	559.293	561.568	572.371	556.273	531.979	501.609
629	6	1.5	0.3	283.18	346.357	230.839	258.688	301.308	304.031	251.642	273.308	277.974	277.159	272.986	268.556	277.199	283.277	275.893	275.749	276.371	273.355	275.745	274.548	276.277	278.712	276.971	275.673	275.014	277.214	275.181	278.752	278.51	276.155	277.567	277.455	280.929	281.719	281.2	284.008	281.008	279.462	286.369	280.999	284.176	282.548	282.062	321.555	278.291	278.1
1000	3	0.7	0.1	423.068	446.623	473.37	493.651	487.964	477.471	462.992	446.527	430.639	417.006	412.321	425.665	417.558	429.629	440.56	430.642	461.021	529.341	547.977	538.709	526.894	516.019	537.426	548.725	555.924	571.502	548.087	546.118	535.954	552.073	541.371	528.393	521.818	506.451	495.095	570.433	546.307	547.565	538.943	578.758	558.639	549.745	537.247	520.92	505.006	518.606
7306	0.2	0.1	0.1	789.7	789.7	789.7	789.7	789.7	789.7	789.7	789.7	789.7	789.7	789.7	789.7	789.7	789.7	789.7	789.7	789.7	789.7	789.7	789.7	786.084	733.915	667.226	783.359	789.7	789.7	789.7	789.7	789.7	789.7	789.7	789.7	789.7	789.7	789.7	789.7	789.7	789.7	789.7	789.7	789.7	789.7	789.7	789.7	789.7	789.7
991	0.8	1.5	1.5	82.0744	88.8985	83.1809	90.1878	74.6477	75.4584	75.8225	76.266	76.4965	76.6623	76.6377	77.2203	76.6923	76.7496	76.6897	76.5271	83.2521	78.3051	75.9685	77.45	76.0499	76.6894	106.741	81.6576	76.3915	92.7315	74.3894	74.924	77.243	91.3034	74.3097	75.2901	75.8481	76.1977	76.3694	76.4545	76.6106	82.0949	79.0526	201.138	73.4856	74.4018	74.7291	75.7097	76.0355	76.1857
7317	0.4	0.1	0.1	719.922	750	750	749.989	749.894	748.134	744.091	732.114	716.933	700.832	683.692	668.448	653.857	714.533	748.676	749.905	747.365	741.886	728.928	711.128	692.147	670.95	652.835	653.262	743.237	750	749.999	749.982	749.169	744.507	733.927	724.011	713.281	699.742	686.414	747.934	750	750	750	749.985	749.974	749.815	748.748	742.91	732.955	721.135
998	1.5	1	0.2	416.572	475.005	466.546	659.422	750.3	740.674	592.301	451.833	398.864	397.138	403.199	403.615	396.512	383.771	382.433	373.572	322.831	255.996	155.294	74.8468	68.9714	73.2951	94.8494	121.749	144.298	164.643	192.754	208.845	192.817	142.698	106.27	78.1968	102.48	166.097	238.208	293.013	297.935	298.682	317.712	399.889	427.716	379.16	293.746	264.571	283.533	297.558
1716	8	0.5	0.1	423.464	459.515	504.614	507.822	509.328	500.269	484.004	461.092	438.384	419.168	404.76	404.703	399.45	457.907	475.745	468.637	486.478	503.367	491.901	480.079	465.365	447.685	434.751	426.874	494.247	510.976	487.609	497.319	496.533	502.72	491.265	470.244	453.764	439.253	424.21	509.395	483.66	510.118	515.448	513.936	521.13	493.42	485.387	470.108	455.656	473.476
1896	8	0.9	0.5	394.337	476.333	466.101	343.446	326.328	392.186	377.344	342.017	308.643	322.373	301.075	293.573	292.811	419.465	410.987	413.804	369.924	353.053	302.058	294.006	293.606	293.968	293.878	294.677	409.034	470.15	461.005	459.79	398.938	360.438	339.089	322.809	293.5	300.89	294.086	401.355	419.697	457.038	480.758	480.433	481.686	428.642	392.43	352.283	338.196	300.416
1883	5	0.2	0.1	509.895	496.188	510.697	493.507	501.848	502.301	503.571	505.048	504.892	501.619	505.384	504.359	503.272	529.203	499.245	503.183	501.754	504.904	501.36	500.153	492.364	483.032	477.85	476.934	522.664	512.524	500.101	501.848	502.075	502.532	502.109	502.652	496.791	497.733	498.13	506.59	511.425	502.452	497.37	500.665	498.842	503.62	502.328	500.807	503.641	497.179
1285	1	1.5	0.4	354.806	345.95	337.915	331.092	337.377	325.447	312.502	302.116	292.865	284.932	277.816	280.201	276.958	277.264	277.574	276.491	276.554	329.704	299.101	283.52	277.084	276.553	276.548	276.564	276.574	276.564	276.602	276.578	279.023	276.505	276.557	276.54	276.241	275.906	275.988	276.571	276.816	292.319	286.385	278.502	277.678	276.482	276.543	276.519	276.645	276.594
1266	9	0.4	0.1	474.238	479.573	478.722	478.715	478.697	480.52	480.522	479.509	477.839	477.116	476.12	475.372	472.916	470.918	469.009	466.126	464.551	464.75	464.375	461.473	461.775	462.012	463.06	463.249	463.358	464.142	465.034	466.814	471.859	474.573	474.577	472.429	469.22	466.914	466.487	476.329	478.551	480.035	477.953	477.967	479.377	477.289	479.358	479.65	478.774	479.047
1176	3	0.6	0.1	572.248	491.068	463.863	447.264	435.343	432.158	434.432	441.06	457.23	641.319	589.476	658.078	580.808	503.27	477.876	476.058	478.172	477.997	478.098	477.883	474.124	475.439	472.636	466.312	459.246	461.745	461.272	453.796	476.21	492.283	484.936	477.686	477.962	477.24	472.653	467.04	464.65	482.481	478.002	476.596	473.322	477.875	478.096	478.05	475.983	490.334
924	2	1	0.6	281.225	274.207	282.846	288.599	272.745	279.597	268.773	265.222	272.378	267.576	271.536	289.106	287.538	289.477	297.26	290.265	283.097	275.657	306.964	333.933	309.086	297.539	291.455	287.298	277.168	303.72	377.997	391.46	400.426	428.043	443.252	453.941	450.147	443.22	450.944	477.358	470.257	483.09	473.297	510.373	471.449	459.587	441.086	418.373	400.831	386.383
758	7	2	8	56.0944	55.7463	55.2676	53.7353	58.2663	56.4065	58.9835	59.0728	58.2059	59.8911	58.9355	59.4718	58.6821	59.364	60.6555	59.1666	60.6248	62.178	62.7837	62.4396	63.9952	62.7634	62.065	61.4301	59.0933	61.8132	60.6281	60.3757	59.119	60.2998	58.6598	59.3475	62.3332	58.943	57.3439	58.1157	56.1626	57.824	56.7883	56.4394	57.255	59.9478	63.1003	57.8517	61.9855	59.2634
1257	10	3	0.1	0	0	0	0	0	0	0	0	0	0	0	0	0	0	0	0	0	0	0	0	0	0	0	0	0	0	0	0	0	0	0	0	0	0	0	0	0	0	0	0	0	0	0	0	0	0
895	0.6	0.1	0.1	666.1	666.1	666.1	666.1	666.1	666.1	666.1	666.1	666.1	666.1	666.1	666.1	666.1	666.1	666.1	666.1	666.1	666.1	666.1	666.1	666.1	666.1	666.1	666.1	666.1	666.1	666.1	666.1	666.1	666.1	666.1	666.1	666.1	666.1	666.1	666.1	666.1	666.1	666.1	666.1	666.1	666.1	666.1	666.1	666.1	666.1
1317	1.5	9	0.1	254.35	256.481	252.984	249.749	249.91	259.204	251.973	262.965	256.313	256.552	258.37	257.592	258.735	258.757	258.136	257.102	257.346	255.243	256.045	255.749	257.648	257.49	254.678	258.107	258.276	259.04	258.453	257.52	259.327	258.825	255.145	252.4	249.595	250.161	255.823	259.715	261.475	258.083	258.159	255.692	249.113	244.458	248.309	248.695	245.593	249.426
1242	0.1	0.3	0.1	640.077	639.954	638.707	633.49	622.575	601.576	563.133	517.789	513.026	640.1	640.1	640.1	640.1	640.1	640.1	640.1	639.303	624.893	596.797	580.537	600.925	619.766	625.383	631.174	636.367	640.1	639.547	635.072	624.814	595.645	542.089	490.276	455.748	438.72	427.427	422.579	511.456	631.648	640.1	640.094	632.846	610.867	561.154	501.658	464.652	452.226
107	0.6	1	0.8	451.436	518.954	591.703	616.239	610.038	593.901	551.712	475.956	419.129	377.792	343.273	336.314	334.321	362.373	375.076	364.423	336.899	308.827	276.382	244.631	221.982	205.183	205.142	385.826	576.729	616.7	616.7	616.7	615.596	605.735	581.353	525.261	481.79	458.126	437.877	529.536	616.144	616.454	616.7	616.7	615.97	607.187	586.434	540.498	504.25	480.64
1841	3	0.3	0.1	413.091	408.484	475.997	514.819	408.629	404.603	405.203	404.896	404.458	404.085	401.172	402.066	400.194	427.057	403.548	407.828	405.617	404.473	402.22	397.976	392.074	383.543	375.478	377.62	452.265	544.458	498.155	404.967	404.645	405.021	405.847	406.484	402.579	396.676	394.651	435.228	405.026	409.219	404.145	407.997	406.7	404.238	404.755	405.967	404.76	400.678
907	1.5	3	4	44.942	38.1109	39.3378	37.4627	42.9035	46.4709	48.376	51.1083	50.69	49.5861	50.2533	50.417	51.2223	51.7545	49.0692	49.91	49.3618	50.6827	51.5889	51.1936	50.2332	51.033	51.0496	50.9629	51.0633	50.6261	41.3112	24.4768	31.1827	25.9535	37.4732	41.8121	45.6813	46.7454	45.1997	37.3916	35.1889	37.5673	26.5526	18.7691	23.4825	30.3545	34.1603	42.4017	45.0632	43.9085
80	0.7	1.5	0.2	525.655	553.022	558.589	556.399	524.722	495.861	418.228	277.323	221.045	218.794	231.375	291.058	347.931	322.286	420.217	526.899	526.693	541.685	471.203	359.682	235.474	223.272	233.012	485.855	543.024	555.312	559.09	560.242	549.832	505.276	444.41	319.872	224.408	225.393	232.483	349.58	533.27	557.142	557.359	552.151	541.462	517.046	506.658	419.318	289.374	221.158
1236	0.7	0.2	1	195.697	191.834	188.235	183.92	179.289	169.536	151.066	132.376	122.476	119.127	116.382	115.245	114.475	112.781	112.29	112.146	109.403	104.643	93.6462	79.7809	72.2174	82.5364	79.958	77.281	76.1803	75.9266	76.0055	75.3678	74.3744	74.0012	68.6466	56.0944	53.1891	53.2474	53.2892	53.3035	53.3106	53.2525	53.4871	53.5606	53.2058	53.2082	53.2501	53.275	53.3041	53.3337
981	10	1.5	0.2	211.629	213.642	218.758	274.121	209.222	210.294	210.812	211.002	210.912	210.926	211.066	211.01	211.129	211.065	211.041	211.058	213.339	210.909	211.833	212.534	212.649	212.679	212.641	212.593	212.595	214.255	212.379	212.438	212.477	212.41	212.231	212.17	212.212	212.268	212.264	212.216	212.37	212.826	212.449	216.027	211.867	212.008	211.884	211.732	211.802	211.756
1093	8	10	10	19.565	21.5527	24.9612	24.5082	25.5061	25.6378	19.9299	15.0565	12.3801	15.1942	17.1238	20.9787	20.9546	27.5262	35.4755	28.4679	35.9563	20.203	0.113332	0.315537	0.0486803	1.67356	5.77943	6.57864	10.3289	8.64092	3.43892	0.0190075	12.297	18.063	0.0738523	0.118141	0.0328839	0.180123	1.4925	27.7842	2.65044	8.37932	11.6129	6.3166	24.0751	0.189946	0.642213	0.0432054	0.0807626	0.589931
1709	0.9	0.8	0.8	364.385	400.592	483.31	508.836	507.232	500.597	481.912	457.964	428.732	394.874	362.671	340.76	321.133	336.779	364.772	385.741	398.83	469.49	473.037	450.287	420.851	391.961	368.66	359.043	382.173	493.035	509.533	508.086	493.935	500.055	498.049	477.484	446.202	411.141	381.604	374.387	365.304	390.077	424.84	481.677	508.627	503.842	488.858	462.827	428.335	393.389
1017	1	1.5	1.5	53.6216	67.6153	59.8812	48.87	50.2449	50.43	50.5868	50.6041	50.6713	50.694	50.7034	50.7278	50.7329	52.4364	50.786	50.6297	57.0082	58.441	50.7627	50.4657	50.6159	50.6867	50.7238	51.4003	65.5285	126.995	68.7866	49.9402	50.0509	50.4003	50.5127	51.9967	54.9014	50.4607	54.8811	274.997	336.571	284.215	254.772	269.545	299.046	230.224	191.829	159.68	132.66	110.729
1194	2	0.2	0.1	353.347	353.354	353.359	353.348	353.391	353.413	352.744	350.921	349.438	352.758	353.341	353.33	353.387	353.402	353.393	353.42	353.416	353.447	353.456	353.447	353.467	399.549	438.003	420.853	402.392	390.612	374.849	357.116	378.27	381.887	367.948	353.404	353.269	353.339	353.376	353.346	353.414	353.363	353.375	353.39	353.447	353.475	353.479	353.556	353.517	353.466
[truncated: 434 more columns]

## Sheet: Outflow(WG inflow-With Demand)
grand_id	q1	q2	q3	1980-01	1980-02	1980-03	1980-04	1980-05	1980-06	1980-07	1980-08	1980-09	1980-10	1980-11	1980-12	1981-01	1981-02	1981-03	1981-04	1981-05	1981-06	1981-07	1981-08	1981-09	1981-10	1981-11	1981-12	1982-01	1982-02	1982-03	1982-04	1982-05	1982-06	1982-07	1982-08	1982-09	1982-10	1982-11	1982-12	1983-01	1983-02	1983-03	1983-04	1983-05	1983-06	1983-07	1983-08	1983-09	1983-10
610	0.7	0.9	4	1432.11	4583.12	3663.81	2124	3935.16	4905.39	2052.37	1500.26	1484.12	1556.25	1510.86	1555.91	1541.14	1378.83	1864.78	1614.59	1428.37	1316.6	1182.77	1002.62	955.595	987.012	954.864	986.427	986.391	1046.6	1652.49	1230.07	1105.87	1079.83	1064.62	994.975	949.662	980.387	948.338	985.394	991.456	970.539	2420.5	2006.42	1154.58	1082.35	1068.32	1035.85	1362.18	1464.94
1294	2	0.3	0.1	42.3823	35.7564	39.3271	38.1677	40.9952	40.7679	39.5699	37.602	37.038	41.8803	39.984	74.2384	86.0903	92.9057	271.373	186.706	183.601	430.138	313.603	183.822	147.534	197.432	188.427	168.728	154.6	150.82	144.945	80.9902	104.172	69.2233	68.3345	59.5753	57.3692	58.1821	56.5408	74.595	94.2622	182.253	216.021	102.232	104.779	87.5024	69.0071	59.2175	48.8807	49.5967
1247	2	0.8	1	77.374	76.0492	84.2353	76.3978	82.2394	86.4193	74.7103	66.2457	63.6504	196.326	97.8966	175.867	116.575	88.7049	145.053	103.754	107.203	92.3401	97.0153	96.9773	91.2768	292.926	346.751	279.807	272.742	263.417	259.834	116.289	274.301	405.049	350.701	125.97	108.636	101.229	94.6991	97.0851	100.014	145.151	139.677	129.642	101.354	104.392	98.9502	91.5244	85.1365	85.6523
1186	6	0.5	0.1	260.512	189.625	84.6724	154.853	110.972	43.737	40.3785	37.3973	34.2729	34.721	33.4579	34.5993	34.3175	30.6576	34.322	33.5852	35.5226	55.1797	43.8563	38.6346	35.8867	36.1034	36.1759	37.9514	37.2328	40.6253	44.6645	38.8891	39.2019	37.0365	36.5751	34.4654	31.9052	32.077	30.8919	213.818	55.5661	252.415	183.5	49.3152	41.0093	39.4824	38.6279	36.2038	33.3701	33.4162
355	0.2	0.8	0.1	156.851	131.712	191.812	601.144	727.867	202.397	72.4243	56.4423	42.4543	37.7036	37.9775	78.7416	157.411	170.486	247.067	512.332	1131.98	238.812	71.0253	62.5933	47.2065	35.9899	34.051	39.4908	40.9127	100.339	212.622	394.175	603.951	341.655	70.2891	62.5089	42.6618	35.9625	38.6999	184.114	283.709	305.951	364.167	850.019	1500.75	535.933	80.6396	60.0093	46.01	109.078
1302	4	0.5	0.1	18.3488	13.5373	14.8592	14.4104	14.6941	15.8866	16.2223	15.2007	15.3045	17.7683	31.8934	37.1012	37.8134	33.6597	73.6069	43.2296	33.8322	269.255	33.0584	18.3478	15.8046	19.8481	23.4291	19.5343	19.0068	17.6466	15.6744	14.6878	15.3479	16.2591	16.1327	15.9289	14.2983	14.3745	13.8927	14.8107	15.7339	16.029	60.9411	19.472	15.6965	15.6502	16.0703	16.1482	14.5375	14.8662
1231	0.4	0.1	0.1	140.708	93.7448	62.4553	52.9472	46.0846	31.4545	31.8906	29.1967	27.8016	28.3792	27.1522	27.802	27.4989	24.5844	27.0619	26.4463	27.2011	137.786	53.6233	32.2944	28.6316	38.5207	83.205	57.8134	50.4787	62.0558	54.0874	42.249	45.9281	37.6955	30.8837	29.4546	28.2389	28.8726	27.7493	241.714	72.075	163.423	91.83	65.0737	54.6641	46.4576	35.0046	29.6139	28.4756	29.2105
1140	1.5	0.7	0.1	5.40513	4.87391	5.25615	4.75292	4.91755	3.78294	3.33098	4.05899	3.03234	2.44357	2.258	2.70778	2.43535	2.12346	2.48664	2.27568	2.23064	1.95719	1.59785	1.91098	2.03126	2.23408	2.17505	2.23284	2.22739	2.00683	2.21432	2.13634	2.47907	3.15693	3.19137	1.74213	1.93343	2.17088	2.11533	2.18963	2.56467	5.99752	3.52185	2.46687	2.21838	1.89446	1.6484	1.59273	1.83372	22.6005
1296	0.9	2	0.8	39.6183	53.0601	41.0586	36.0241	37.0222	36.3042	30.0102	26.997	24.5922	23.8446	9.59477	8.8521	8.87464	9.66649	11.4108	9.97208	9.75804	44.098	20.6136	11.2981	9.89414	9.96301	29.9976	16.6854	12.5126	11.3251	12.5716	11.7701	31.3356	17.9485	11.7486	10.3151	9.3695	9.25622	8.77636	24.2175	17.5477	59.0375	49.9932	41.2398	44.5948	37.0047	13.1928	11.4894	10.0837	9.80362
1277	2	0.5	0.9	4.19786	4.04526	4.36129	4.19411	5.65681	5.85446	5.29965	4.9552	4.17226	4.09168	3.849	5.36989	4.9263	4.81591	6.1144	6.30852	5.30252	23.3263	13.9508	5.37175	4.59732	4.47252	4.17098	4.21722	4.13625	3.86755	4.41082	4.32815	5.346	5.25004	4.87935	4.45088	3.98528	4.017	3.82549	4.07317	4.52889	5.13954	6.29586	5.98405	5.07041	4.92484	4.8886	4.58959	4.10361	4.06014
1280	1	0.1	3	80.2251	68.2573	71.8617	66.5857	61.1801	7.08735	6.71742	6.00938	87.7151	115.621	78.4915	147.005	124.271	82.3422	150.656	79.5022	86.6464	84.2848	89.8087	80.9705	70.1438	80.1782	89.3583	75.019	30.6944	32.7389	24.5818	17.449	29.5204	16.848	17.9783	7.25478	6.5159	6.70118	6.46883	6.69898	10.7313	29.4008	32.8938	11.5971	9.30354	6.98508	7.18596	6.58617	5.84323	6.0223
182	0.8	1	0.7	203.136	585.396	223.376	125.014	105.51	100.877	96.0998	88.0114	91.5215	87.3341	77.1987	73.9169	68.5113	98.2939	147.71	154.821	107.398	73.8658	50.5567	41.8249	34.1316	31.8388	72.9788	220.643	165.56	288.981	408.012	488.086	159.268	106.398	109.04	99.4767	88.036	86.0924	127.315	462.649	392.767	510.143	695.356	290.288	149.093	110.562	108.058	99.184	88.7713	86.4494
1152	0.9	0.7	0.1	0	0	0	0	0	0	0	0	0	0	0	0	0	0	0	0	0	0	0	0	0	0	0	0	0	0	0	0	0	0	0	0	0	0	0	0	0	0	0	0	0	0	0	0	0	0
1295	0.4	0.1	0.1	17.9356	45.3017	41.284	26.133	33.811	20.1771	21.2199	20.5955	17.6307	17.2105	16.472	17.1627	17.1212	16.0246	17.5374	16.7466	17.8777	20.5983	29.8424	20.4484	17.6873	17.9345	81.9065	26.9278	35.7306	28.3133	35.4029	77.7812	83.0666	23.9132	20.3098	20.2447	18.6433	17.8351	99.7448	138.006	69.0335	140.376	119.273	28.125	106.108	23.2343	22.0915	20.844	17.7228	17.9713
629	7	1.5	0.2	2108.49	4380.7	3779.76	2153.48	3158.59	4766.99	2192.3	1728.28	1673.93	1747.07	1737.4	1744.55	1757.33	1591.84	1743.78	1651.15	1615.07	1566.02	1684.09	1636.59	1529.61	1597.16	1587.78	1601.74	1670.68	1467.17	1647.38	1491.31	1543.05	1477.19	1542.26	1411.09	1295.38	1370.09	1311.18	1486.29	1371.77	1323.22	1540.14	1216.67	1275.05	1219.55	1268.49	1624.51	1283.12	1465.84
1266	6	0.4	0.1	8.77829	23.7639	13.915	16.1026	24.3644	7.38039	6.78384	6.45101	5.87039	5.84073	5.50005	5.56891	5.48798	4.89659	5.45868	5.39062	5.62632	5.54739	6.13255	6.14091	5.68181	5.74206	5.57127	5.82094	5.8795	5.35767	6.04317	5.93249	12.6342	6.61863	6.56059	6.27986	5.74849	5.70195	5.40672	29.1232	17.9956	85.1875	45.9598	17.3669	47.1986	12.4913	6.84765	12.5093	6.11678	6.10098
1176	0.6	0.1	0.1	2.63868	2.38007	2.62072	2.50102	2.66958	7.17576	21.0508	22.043	71.9404	56.7034	186.068	125.284	22.5556	20.354	46.1892	23.3336	22.9243	24.7135	29.8815	24.1704	21.7241	45.3659	21.8057	22.2929	22.0002	20.0496	22.1105	20.9938	92.9781	154.454	62.5326	49.0866	31.3059	23.1922	21.6725	22.1366	22.0526	69.1021	28.3156	22.4308	22.4648	24.1684	33.878	28.0563	22.13	116.972
758	3	2	9	91.8967	68.61	96.7693	70.7884	68.6262	74.8272	53.9495	97.9466	66.3892	69.1319	68.607	55.5311	72.6769	50.8952	72.5808	70.4096	71.6629	64.3152	53.0256	52.7276	52.5753	67.9096	40.028	55.6262	58.0494	55.3815	58.8482	58.371	70.7234	65.7548	93.3638	75.5584	69.7662	90.0284	78.1543	83.6121	84.2374	58.9475	81.7277	59.2477	73.0136	66.9046	83.2129	65.1851	61.348	78.5242
1242	0.1	0.3	0.1	3.35269	2.72168	2.50009	2.40322	2.87004	3.90912	4.39682	3.47422	223.89	199.534	46.2621	49.8173	48.2243	37.6049	33.845	27.9754	7.66545	3.90754	4.26576	3.54892	3.21795	2.65542	2.39728	2.48391	2.49324	4.64268	2.59401	2.41019	2.89892	3.69666	3.86256	3.43362	4.09193	5.19829	4.92061	5.52814	4.85623	63.5677	19.8489	31.2009	3.03605	3.84849	4.32556	3.54949	2.56139	4.69902
1236	0.7	6	0.7	6.04827	5.37096	5.94908	5.84933	5.97293	45.8962	55.7312	29.9922	3.43914	3.34105	3.15414	3.95944	5.38172	4.81809	5.84659	6.8656	7.09391	6.59056	6.77625	5.58808	4.28843	12.2262	12.8617	8.1165	7.56331	6.81783	8.01691	7.82685	7.64265	12.1069	12.1454	8.95815	7.2149	6.32133	5.45173	5.16471	4.91307	4.60634	5.7921	6.7463	7.36477	6.89804	6.59959	5.45293	4.19869	3.68637
1194	2	0.1	0.1	10.2048	14.764	14.0539	12.191	10.6041	5.24783	2.45545	2.31938	2.08756	10.1418	8.90725	11.7715	10.5743	8.72061	10.2299	10.3782	10.3553	7.71828	3.81522	2.27052	4.64425	49.764	72.4013	55.1797	43.352	28.8882	24.0401	19.6114	52.5329	70.5249	33.1141	17.8493	13.2827	12.2722	10.3288	10.1347	8.71262	8.4656	10.0797	8.86257	8.88313	7.60154	3.60485	3.46867	3.24774	4.44986
[truncated: 434 more columns]

## Sheet: Storage(WG inflow-With Demand)
grand_id	q1	q2	q3	1980-01	1980-02	1980-03	1980-04	1980-05	1980-06	1980-07	1980-08	1980-09	1980-10	1980-11	1980-12	1981-01	1981-02	1981-03	1981-04	1981-05	1981-06	1981-07	1981-08	1981-09	1981-10	1981-11	1981-12	1982-01	1982-02	1982-03	1982-04	1982-05	1982-06	1982-07	1982-08	1982-09	1982-10	1982-11	1982-12	1983-01	1983-02	1983-03	1983-04	1983-05	1983-06	1983-07	1983-08	1983-09	1983-10
610	0.7	0.9	4	36346.6	36700	36700	36700	36700	36700	36700	36700	36700	36700	36700	36700	36700	36700	36700	36700	36700	36700	36683.2	36545	36434.6	36356.7	36298.7	36251.7	36222.4	36461.7	36700	36695.3	36553.8	36283.3	35994.5	35728.4	35550.1	35409	35305.5	35423.7	35832.2	36443.9	36700	36700	36673.7	36466.7	36247.9	36501.6	36700	36700
1294	2	0.3	0.1	2770.34	2759.08	2745.95	2735.47	2739.94	2749.69	2732.23	2701.07	2683.8	2700.94	2711.52	2770.26	2777.34	2777.21	2782.55	2775.12	2775.88	2878.77	2794.51	2775.83	2776.56	2776.55	2776.75	2776.38	2776.78	2776.23	2776.24	2776.79	2777.49	2777.26	2777.44	2777.57	2777.47	2777.82	2777.47	2777.29	2777.13	2778.06	2777.69	2776.54	2777.24	2777.14	2777.22	2777.38	2777.1	2777.19
1247	2	0.8	1	1583.14	1564.87	1541.26	1508.08	1489.01	1472.64	1419.09	1361.1	1318.18	1611.4	1582.85	1749.45	1769.96	1765.19	1795.85	1800.17	1801.74	1786.7	1769.35	1750.49	1731.79	2052.57	2307.95	2176.08	2043.75	1949.94	1842.62	1807.82	1894.28	1942.6	1877.41	1807.31	1806.73	1806.65	1802.52	1799.05	1804.01	1807.66	1808.03	1806.37	1802.34	1805.26	1786.84	1754.07	1720.24	1687.63
1186	6	0.5	0.1	1724.97	1707.19	1707.32	1714.77	1713.96	1705.5	1696.29	1674.01	1647.37	1629.29	1613.81	1600.64	1583.68	1567.84	1554.92	1541.44	1537.36	1643.11	1652.03	1640.16	1629.06	1618.9	1620.65	1619.28	1614.22	1653.17	1676.58	1678.12	1676.8	1667.03	1647.06	1618.09	1585.06	1558.48	1539.5	1704.52	1698.86	1726.69	1707.96	1704.26	1706.16	1709.01	1696.47	1670.43	1640.03	1612.08
355	0.2	0.8	0.1	1760.6	1760.6	1760.6	1760.6	1760.6	1760.6	1697.12	1572.7	1503.58	1471.7	1553.42	1715.78	1760.6	1760.6	1760.6	1760.6	1760.6	1760.6	1712.36	1595.61	1510.34	1471.9	1459.47	1549.74	1662.6	1745.08	1760.6	1760.6	1760.6	1760.6	1721.39	1604.67	1527.43	1500.17	1602.69	1750.28	1760.6	1760.6	1760.6	1760.6	1760.6	1760.6	1741.54	1649.63	1631.24	1729.44
1302	4	0.5	0.1	972.416	973.766	973.556	972.413	969.759	964.059	950.759	940.373	943.482	960.552	968.817	972.011	972.848	972.107	972.923	972.351	972.479	1010.52	958.144	959.28	964.049	969.995	973.015	972.95	973.768	972.522	971.285	969.467	968.577	964.83	954.592	946.785	940.849	938.198	937.267	939.253	944.86	960.763	971.923	970.692	967.82	966.854	963.096	959.081	955.083	953.832
1231	0.4	0.1	0.1	1289	1289	1289	1289	1289	1287.26	1275.55	1258.78	1240.76	1223.93	1207.6	1193.29	1177.98	1163.62	1150.02	1136.03	1130	1270.15	1289	1288.85	1287.24	1286.73	1289	1289	1289	1289	1289	1289	1289	1289	1287.45	1279.3	1265.18	1249.77	1238.23	1285.85	1289	1289	1289	1289	1289	1289	1288.87	1286.35	1278.79	1267.01
1140	1.5	0.7	0.1	937.879	933.322	927.521	921.201	916.128	912.091	907.235	902.412	897.611	896.132	893.908	894.071	891.66	889.091	887.545	884.398	881.715	879.597	876.482	873.796	871.001	868.398	865.848	863.374	860.851	858.521	855.762	852.349	851.698	853.889	856.988	853.536	850.509	847.54	844.793	843.15	842.9	856.873	855.897	853.958	850.45	847.76	844.714	841.614	838.504	885.719
1296	0.9	2	0.8	725.823	711.993	682.466	658.661	637.278	612.781	585.133	559.875	537.582	518.039	505.299	500.928	496.009	494.733	492.179	487.329	483.582	502.351	491.21	483.96	479.955	476.989	498.264	494.548	492.119	491.087	490.088	488.559	500.043	494.563	488.902	482.265	476.511	472.536	469.497	490.013	491.285	509.816	509.421	503.588	511.388	500.791	492.94	488.532	484.582	480.543
1277	2	0.5	0.9	858.869	858.433	856.388	854.515	860.496	863.414	854.034	841.771	834.959	832.053	829.023	834.621	836.129	839.975	848.065	857.85	859.893	876.826	872.766	868.239	866.163	864.15	862.266	859.912	857.108	855.529	854.295	853.097	855.777	855.614	851.638	846.464	841.965	838.123	835.011	833.373	833.704	840.062	848.68	855.824	856.659	855.768	852.214	847.563	842.932	839.449
1280	1	0.1	3	1167.34	1091.93	1016.65	939.712	866.89	828.295	787.068	744.347	882.268	1209.33	1204.37	1210.91	1211.3	1211.23	1211.3	1208.74	1189.81	1145.09	1070.85	986.112	922.084	902.005	914.439	868.017	846.714	846.534	846.599	846.673	846.702	845.989	844.728	837.136	832.146	831.823	834.823	839.953	844.908	846.605	846.711	846.642	844.318	842.097	827.888	807.895	788.693	777.3
182	0.8	1	0.7	886.205	1087.62	1098.41	1098.04	1077.35	996.486	895.855	811.469	740.043	667.753	603.592	549.283	497.747	518.299	550.938	588.02	524.706	440.571	366.166	318.458	293.811	277.618	325.729	547.756	882.167	1009.11	1101.33	1102.58	1102.1	1080.8	1035.42	949.25	886.636	836.902	870.886	1097.47	1086.57	1100.7	1101.89	1100.03	1100.43	1093.05	1025.11	942.501	884.734	833.58
1152	0.9	0.7	0.1	0	0	0	0	0	0	0	0	0	0	0	0	0	0	0	0	0	0	0	0	0	0	0	0	0	0	0	0	0	0	0	0	0	0	0	0	0	0	0	0	0	0	0	0	0	0
1295	0.4	0.1	0.1	822.952	866.89	872	872	871.802	867.547	854.272	837.238	821.656	812.176	803.405	801.037	800.158	814.917	817.477	812.456	816.124	856.229	869.996	860.982	857.639	852.728	871.149	871.969	872	871.991	871.955	871.949	872	871.984	869.542	862.848	851.067	845.791	856.375	872	872	872	872	872	871.951	871.679	870.473	868.823	867.989	864.501
629	7	1.5	0.2	374.5	313.555	271.349	260.17	285.842	247.636	249.931	278.61	281.407	280.895	279.846	283.431	278.156	277.43	277.2	272.644	271.289	273.527	279.29	280.997	282.133	282.905	282.943	282.977	281.275	282.837	278.704	272.897	282.052	275.851	282.553	285.999	283.252	288.038	282.547	286.27	285.083	281.564	280.289	272.974	278.582	271.941	286.459	335.513	284.178	293.716
1266	6	0.4	0.1	478.521	479.748	480.002	479.574	479.978	479.738	480.099	479.491	478.329	478.186	477.774	477.605	475.713	474.228	472.821	470.439	469.33	469.967	469.989	467.456	468.183	468.91	470.45	471.133	471.712	472.913	474.221	476.426	479.362	478.909	479.231	477.411	474.571	472.693	472.71	479.501	479.385	485.095	476.963	479.224	482.152	480.327	480.385	479.235	479.564	480.32
1176	0.6	0.1	0.1	476.95	475.294	472.223	467.935	467.933	477.101	482.439	488.604	503.219	684.618	682.534	686.044	684.257	683.434	686.03	684.53	684.886	685.455	686.1	684.929	678.645	678.336	681.408	672.405	660.868	659.743	656.508	645.443	662.279	686.1	686.1	686.1	686.1	684.785	677.102	667.152	660.326	686.065	685.977	684.374	678.347	683.42	686.1	686.1	682.592	676.663
758	3	2	9	53.3267	54.9713	55.4653	59.4103	60.6523	62.6041	59.7594	59.733	56.8057	58.4438	58.7444	56.8324	61.0751	55.4328	60.7872	60.4335	57.6738	58.9042	60.8051	61.3743	63.2968	60.6288	61.3465	59.4366	58.4695	59.9757	58.8087	60.8823	59.9355	59.3178	57.1838	53.2715	57.139	56.1719	57.4916	53.9515	54.5602	54.4241	56.1929	56.0753	59.1161	55.9979	59.8746	58.4509	57.4901	58.8932
1242	0.1	0.3	0.1	640.1	640.044	639.182	634.416	623.724	602.111	562.019	515.242	510.123	640.1	640.1	640.1	640.1	640.1	640.1	640.1	639.289	624.275	594.697	577.203	597.09	615.941	621.946	628.187	633.92	640.051	639.751	635.724	625.678	595.498	540.662	487.631	452.108	434.606	424.285	420.372	509.875	631.114	640.1	640.097	632.799	610.163	558.484	497.547	459.735	445.78
1236	0.7	6	0.7	399.104	395.026	390.885	385.931	380.488	353.604	284.186	224.214	206.066	202.636	199.854	198.821	199.267	199.067	200.114	202.365	202.174	199.385	189.758	176.703	169.71	182.601	190.123	192.267	194.717	197.48	200.838	203.805	206.068	208.598	206.434	197.921	192.646	191.441	191.458	191.251	190.716	190.699	191.646	193.507	193.731	190.277	181.251	170.212	163.073	160.292
1194	2	0.1	0.1	353.31	353.19	353.198	353.165	353.23	353.177	352.937	351.863	351.159	353.2	353.235	353.268	353.246	353.247	353.293	353.197	353.197	353.194	353.06	353.408	353.14	397.201	420.599	389.107	360.21	353.02	353.089	353.204	375.313	366.763	353.293	352.973	353.132	353.21	353.301	353.26	353.274	353.292	353.243	353.25	353.259	353.257	353.241	353.396	353.331	353.207
[truncated: 434 more columns]

## Sheet: Outflow(OBS inflow-No Demand)
grand_id	q1	q2	q3	1980-01	1980-02	1980-03	1980-04	1980-05	1980-06	1980-07	1980-08	1980-09	1980-10	1980-11	1980-12	1981-01	1981-02	1981-03	1981-04	1981-05	1981-06	1981-07	1981-08	1981-09	1981-10	1981-11	1981-12	1982-01	1982-02	1982-03	1982-04	1982-05	1982-06	1982-07	1982-08	1982-09	1982-10	1982-11	1982-12	1983-01	1983-02	1983-03	1983-04	1983-05	1983-06	1983-07	1983-08	1983-09	1983-10
753	1.5	0.9	0.1	1245.58	1171.67	1357.43	1357.15	1347.06	2128.14	1874.2	1402.64	1516.12	1797.22	1333.77	1243.86	1315.78	1200.46	1421.63	1214.1	1277.55	2934.61	2797.97	1416.87	1252.97	1327.01	1319.29	1339.77	1250.12	1309.58	2357.45	2716.81	1912.95	2860.07	3334.05	2744.41	1679.87	1926.34	1378.82	1325.57	1462.37	1728.36	2095.7	1331.31	1293.78	2243.22	2852.67	1529.03	1254.6	1291.42
870	1.5	0.9	0.3	1469.57	1994.28	2386.9	1605.05	1473.84	1454.58	1563.71	1580.09	1510.31	1590.89	1860.15	1879.5	1844.32	2041.73	1994.08	1439.4	1429.19	1520.95	2161.91	1894.71	1499.51	1474.36	1351.22	1476.38	1610.29	2431.55	3119.52	3010.25	2631.6	3142.73	2114.09	1605.94	1469.06	1698.01	2458.79	1919.81	1513.36	2085.66	3044.08	1853.5	1798.81	1431.83	1498.85	1568.59	1590.05	1467.28
597	1	0.6	0.8	1024.66	881.266	831.58	782.206	1518.16	1564.22	1327.35	1039.72	1005.97	1015.97	982.454	1012.77	856.397	520.999	572.847	537.806	602.16	675.812	614.39	538.859	538.944	599.397	554.934	543.116	516.767	495.941	619.524	600.276	847.617	1298.22	1479.07	985.477	765.949	877.577	791.78	783.912	626.909	638.05	1127.89	996.469	1469.87	1577.1	3268.76	1517.6	1095.57	1130.64
307	0.8	0.5	1.5	333.975	287.506	334.467	389.948	346.512	687.4	728.927	553.264	429.388	321.859	382.593	319.245	400.493	379.477	504.64	341.484	532.883	887.353	715.517	552.812	496.476	506.608	493.485	512.978	499.783	500.206	634.211	603.397	607.154	767.997	758.352	581.718	525.193	540.634	520.881	536.65	537.542	492.89	562.619	527.61	567.265	593.159	628.163	582.553	523.551	521.443
1753	0.4	0.1	0.1	6674.84	3997.26	13076.3	5966.31	4796.5	2726.65	2790.96	2228.48	2287.55	1892.01	2559.16	2007.09	1821.48	3526.15	1967.79	2157.21	1555	2605.7	2532.16	2431.32	2086.54	1867.15	1822.96	3679.36	10346.8	8343.89	6132.91	3061.7	1868.56	1925.96	2751.28	3660.49	2756.27	2521.91	3868.76	10235.6	5781.08	6146.66	3975.25	8092.37	8277.87	3958.06	3198.76	2953.26	1945.38	1574.4
297	1.5	8	0.9	392.922	244.137	300.68	354.39	2400.97	2032.66	1111.59	650.922	498.728	478.856	408.16	374.928	481.66	317.215	364.194	408.281	1503.35	2379.46	2521.15	1168.95	632.398	502.065	423.448	380.336	317.354	300.968	417.226	378.153	840.215	3214.44	1793.42	883.822	626.036	581.142	474.011	419.858	422.813	356.129	425.584	431.066	1283.71	2125.11	1660.52	955.094	585.611	486.574
1036	1.5	0.7	0.5	185.352	180.459	274.78	301.732	267.574	262.067	329.167	256.952	218.121	176.088	178.863	176.946	152.78	140.35	123.73	114.204	129.406	133.585	132.163	141.443	118.317	114.481	123.566	124.578	222.863	430.888	384.705	309.401	227.998	281.778	340.404	268.817	251.859	215.325	213.715	835.731	591.619	386.751	535.85	821.058	945.359	535.593	470.109	351.004	299.294	242.349
989	8	1.5	0.5	124.766	156.618	309.992	1381.9	329.631	198.119	166.758	166.422	145.04	130.169	119.158	122.544	115.722	99.9534	108.923	99.613	196.733	1186.35	2089.03	399.436	219.513	349.554	781.07	441.999	418.567	1285.65	1084.51	431.475	808.315	2225.85	1114.43	691.031	300.23	207.041	163.424	1309.65	480.348	531.797	538.817	2167.11	3097.12	1463.27	509.83	183.784	167.426	192.965
1026	4	0.6	0.1	111.071	129.756	180.435	202.199	155.746	150.751	155.861	135.442	120.529	105.685	106.005	111.606	99.3463	87.7341	105.961	104.449	139.018	179.432	194.864	178.299	147.621	134.482	141.219	127.379	158.453	239.53	195.965	184.603	167.859	381.514	197.706	207.331	163.246	150.952	138.144	1088.07	208.39	350.597	325.523	704.193	624.223	184.354	332.858	176.175	160.627	151.826
1848	1.5	1	0.2	187.654	212.442	330.539	554.438	277.268	166.041	162.084	145.803	136.744	148.758	156.312	168.209	142.497	154.6	173.728	199.556	159.213	193.01	153.784	123.254	132.78	122.772	118.233	127.216	196.098	230.613	201.346	236.029	221.29	163.898	133.081	139.834	115.222	176.166	127.488	366.452	436.046	247.722	271.986	401.489	430.375	362.868	254.639	180.788	148.135	156.198
1869	1.5	1.5	0.6	184.523	238.748	482.904	745.679	371.443	200.4	190.84	106.312	46.9609	88.5551	53.3649	59.467	47.9651	87.4975	90.9348	110.575	51.3727	66.1023	56.9487	47.3835	46.6843	45.1617	42.7022	41.0195	104.773	139.365	120.884	401.524	270.259	53.8909	60.8137	62.3956	66.441	66.3821	70.0273	593.587	695.199	439.309	408.888	428.356	432.105	352.359	210.779	199.119	164.037	151.942
7313	1.5	0.6	0.2	225.342	245.282	302.687	387.119	667.194	652.068	605.737	359.48	284.855	369.878	383.105	335.448	285.728	264.564	302.267	336.472	632.659	1006.63	562.948	487.102	175.861	295.811	355.403	313.594	247.745	318.589	363.656	437.546	670.029	854.469	806.565	549.574	508.923	539.743	432.906	349.498	364.488	300.978	394.948	406.44	534.877	684.643	665.397	569.163	342.142	509.969
1042	1	1.5	0.7	66.0963	70.1858	105.202	212.553	115.994	119.839	78.5877	58.9704	55.3556	55.5511	55.0436	56.9379	54.2683	51.7499	61.1524	68.9129	76.3205	78.0821	68.6362	57.6806	51.3601	48.7887	52.9446	51.1707	55.6218	156.104	113.382	89.3526	145.427	151.944	101.261	68.9904	58.4743	53.6182	57.0779	562.379	313.681	107.916	105.793	325.728	395.879	106.198	87.5766	63.0791	55.7327	59.696
884	0.4	0.1	0.1	1854.32	1304.32	1641.03	1539	2140.58	2021.56	2386.64	2751.26	2131.88	1935.48	1913.71	1152.54	1420.66	1349.19	1778.82	2507.98	2237.04	1798.47	2176.17	2324.58	1787.18	1518.11	1129.91	1257.66	1491.14	1083.9	1409.44	1722.2	1733.86	1192.93	1953.6	2348.49	2245.76	1770.68	1918.76	2049.04	2245.21	1582.46	1370.62	828.247	879.123	1594.12	1406.47	2729.58	2047.82	2063.04
1144	2	0.1	0.1	1261.11	1587.01	1112.51	1071.08	1239.8	853.06	558.109	372.145	440.688	1354.75	880.13	1356.3	823.301	833.424	1031.77	745.418	918.233	1701.3	1219.83	730.338	592.668	1381.21	2113.79	1759.67	1011.18	1683.99	1790.18	1365.82	1682.07	2999.75	1756.71	1633.89	865.078	782.106	867.282	3523.34	1770.17	1820.2	1892.15	1608.12	1792.79	1580.48	1033.23	860.366	710.48	694.276
1006	2	0.5	0.1	29.4199	30.881	44.1639	56.5755	41.3743	33.9151	32.8335	30.0285	28.3267	29.3023	28.5605	28.5932	27.4396	24.816	28.4643	27.444	33.3328	48.0653	60.1286	37.1752	31.1054	32.6465	43.0023	38.2592	45.0379	116.029	89.1304	44.0054	78.5422	142.189	47.0821	45.1449	44.4606	34.9022	32.405	254.205	78.4575	47.9312	37.3127	234.058	290.954	109.705	67.6364	34.3092	31.1046	81.5078
1048	1.5	7	0.1	287.005	233.119	362.637	1487.29	1279.43	889.431	68.2889	104.161	31.1336	29.6758	30.1856	97.5499	105.718	28.6145	31.1271	99.1178	294.283	286.926	252.167	230.624	118.949	205.437	719.732	167.497	111.061	448.479	449.818	165.924	2501.03	2191.7	699.943	231.58	30.472	29.4547	29.4932	105.463	192.286	230.33	616.166	1596.32	1361.55	725.424	661.054	39.0559	106.855	493.078
1032	9	1	0.1	11.1507	42.0948	173.406	389.458	231.658	101.658	11.3717	10.6716	11.0415	10.357	9.9472	10.1764	9.75594	8.77528	10.1265	10.0994	13.3173	81.2194	83.7613	12.6504	45.6269	48.0829	149.552	41.8469	58.9121	195.692	201.691	85.6042	187.119	677.034	368.67	168.792	139.441	38.783	29.2635	123.188	138.848	269.123	269.318	810.607	568.777	270.066	206.38	130.674	53.2385	84.3413
355	2	0.6	0.7	142.251	155.125	194.625	173.553	259.083	420.843	316.453	139.24	233.007	198.988	195.356	175.731	172.764	147.183	152.777	114.731	297.258	597.07	242.536	123.211	115.938	126.707	154.897	187.393	150.641	178.217	236.873	156.307	165.832	434.68	483.895	221.468	236.954	375.284	268.292	259.884	280.963	262.738	242.023	187.3	289.264	584.149	686.058	196.116	228.012	302.432
1101	8	0.9	0.1	94.9775	104.542	382.538	573.39	166.078	109.42	89.3017	75.9042	66.486	73.6947	76.4274	112.297	70.6649	81.0033	97.088	114.574	83.1498	128.191	118.346	80.8541	81.1201	67.939	67.7927	62.0917	80.6345	131.529	135.371	123.479	124.933	77.5575	83.331	79.6895	99.8204	71.2293	68.124	157.238	425.986	157.962	260.296	338.031	279.524	278.58	98.3746	79.2712	67.014	66.8142
1023	5	2	0.2	127.582	164.545	244.799	775.534	137.737	96.1189	39.6126	44.5143	27.3588	25.1344	24.2983	26.5486	25.9522	31.7073	35.0051	34.1027	138.226	163.376	131.558	97.1851	47.7828	119.088	426.301	82.3522	66.1417	235.687	221.218	90.2935	455.651	1118.84	231.759	62.265	35.6574	34.5429	33.2537	43.7904	54.6372	116.662	247.723	1012.19	347.131	367.427	379.259	35.5362	42.8506	71.8509
1864	1.5	1	0.2	85.4498	92.6986	143.355	226.598	117.725	78.668	76.9246	68.3248	60.3013	71.7869	69.3348	73.0377	60.5529	74.1892	77.5981	81.719	61.4324	68.4045	43.4335	18.6677	21.6178	33.3888	26.3284	25.9716	83.8646	83.7782	68.6183	102.424	108.765	66.5968	25.4805	62.2239	111.917	105.145	73.7339	194.097	188.941	149.114	171.452	177.417	182.727	160.464	133.772	106.3	90.0055	82.3389
1021	2	8	0.1	2.80892	3.15416	40.7937	77.6157	56.7594	81.8016	6.34758	2.3317	2.20869	2.10736	2.01744	2.43693	2.4283	2.18886	2.58842	2.56278	61.0032	22.057	2.89619	10.2367	56.5012	19.8927	127.707	4.19127	10.3732	36.7217	27.2776	10.5456	192.991	192.566	137.82	5.78106	2.31225	2.23898	2.24743	2.67832	2.63609	25.8427	60.7491	101.382	41.7978	152.089	7.78734	2.2863	2.5931	9.90213
1120	2	1.5	0.2	1.53366	1.52049	1.78803	1.82015	1.91955	3.15001	1.66063	1.39922	1.44402	1.70631	1.42855	1.60841	1.42682	1.3086	1.95995	1.82025	2.25343	15.7771	1.84925	1.96325	2.05499	18.573	6.51592	1.53725	2.38649	3.84562	10.666	2.26316	65.1965	104.497	60.9321	15.592	1.53425	1.51234	1.41685	1.8013	3.26749	12.201	8.10686	6.1246	23.7656	20.4509	2.35981	1.48904	1.38959	57.1068
182	3	0.6	0.5	976.494	761.189	859.483	508.815	456.071	243.309	195.62	150.194	137.914	142.157	128.346	148.047	144.05	141.123	274.906	219.135	184.094	126.004	79.4274	70.5126	70.2716	71.3285	125.662	540.926	1068.81	707.968	895.781	1328.19	956.607	742.412	221.856	161.662	150.137	175.111	357.919	715.272	647.963	984.222	1398.13	937.422	1004.05	902.352	420.927	229.497	177.415	158.216
7311	4	0.1	0.1	2.80692	2.67527	31.8984	62.1448	12.2218	2.97974	2.85323	2.82724	2.71341	2.77299	2.67136	2.76619	2.74188	2.46633	2.73295	2.65809	2.93101	3.4463	2.89861	2.80618	2.69916	2.82263	3.14036	2.97941	2.86708	2.73058	12.9851	3.18572	73.344	188.855	35.5	3.01721	2.79977	2.82903	2.73482	2.96343	3.44687	61.3003	45.4837	164.12	51.7148	11.7454	3.19853	2.86833	2.736	2.98297
1755	1.5	1.5	0.8	79.1357	83.5816	200.207	166.875	67.2206	54.7679	47.0961	40.5293	34.2449	31.0825	27.2898	33.6109	37.7892	121.884	101.389	71.8549	68.1902	233.626	70.9776	46.4004	39.5768	36.0163	34.8195	83.809	268.372	266.721	135.155	91.7417	82.0993	58.274	48.8101	43.1744	113.781	44.155	36.5743	118.24	124.412	160.463	81.5003	158.429	332.782	273.069	104.497	42.8819	33.0191	34.5228
1192	5	0.4	0.1	312.113	445.244	269.728	443.513	364.836	109.308	62.4624	57.0719	53.703	56.2338	55.0985	61.485	60.3273	56.1253	67.3643	64.3463	246.554	519.089	134.013	61.5501	57.9879	63.7264	66.7218	66.518	90.9498	178.819	131.613	94.3741	124.407	127.476	100.023	61.3997	56.8435	61.66	61.703	508.543	170.552	489.447	396.409	170.947	157.144	101.012	155.798	66.3658	57.6757	57.9729
541	10	9	0.9	41.1851	35.8359	39.5317	63.8689	178.532	509.415	239.133	90.8151	64.4167	61.4179	45.7897	44.4714	39.3737	32.5901	38.712	39.3155	57.8796	101.363	81.8557	66.3304	51.134	44.2276	36.8959	36.7869	36.0998	31.3408	37.6935	58.7909	136.568	269.222	202.318	111.673	99.7134	90.1223	61.0086	52.129	45.3867	41.8386	51.3856	60.4448	99.5141	525.339	280.254	153.15	90.1774	65.8464
1716	9	0.6	0.1	19.3039	19.4806	28.0461	40.7482	20.18	18.0938	17.6133	16.6186	15.249	15.1799	14.4242	16.2714	16.3939	21.0632	21.0531	16.825	22.4618	29.1148	19.2881	18.0959	16.7915	16.5766	15.6898	16.4269	73.0179	137.247	34.8187	22.1358	19.7075	19.0444	18.3883	17.2732	16.0136	16.1785	15.3028	180.933	34.7454	48.2352	33.513	91.8207	178.856	27.5512	20.3199	18.4907	17.1657	47.8772
1883	3	0.4	0.1	65.8038	55.5383	71.2014	75.9277	74.3713	38.2748	37.697	32.417	19.1126	18.4825	24.3021	35.4579	39.6823	42.5399	45.6661	40.852	54.3891	85.9681	38.0952	47.4664	36.7282	46.0136	34.952	48.9368	44.4764	43.0902	41.1098	55.8107	42.4174	31.6064	20.241	19.1493	17.6387	17.61	16.5942	36.1579	61.646	164.419	69.0567	46.0499	71.4718	54.7252	38.4521	42.6589	41.2442	36.3172
895	0.5	0.3	0.1	1425.27	1063.01	1543.8	2103.87	2302.29	2145.88	2584.89	2694	2528.26	2652.62	2461.67	1211.87	1050.43	917.865	1641.38	2431.52	2472.12	2312.25	2529.48	2402.55	2455.96	2545.56	1376.63	1072.87	1107.95	968.364	1277.11	2095.09	2201.98	1947.34	2301.52	2377.7	2343.36	2595.93	2865.62	1982.94	1826.31	1494.02	1632.32	1199.4	1864.64	1587.95	2081.43	2636.2	2564.91	2670.82
1093	0.5	2	10	30.2827	38.3247	34.3399	67.5501	195.568	29.1414	9.40147	0.309874	0.384191	9.68798	23.1931	44.0613	19.5407	23.0457	113.047	31.0972	167.127	268.285	54.4373	22.8999	10.952	152.075	46.0194	29.1366	62.7558	306.239	103.093	25.2186	301.859	187.044	14.233	5.91152	3.03045	2.67552	6.89315	328.323	44.7777	60.2304	127.123	108.461	417.547	30.7159	47.4055	4.8317	1.67065	1.07332
1709	0.6	1	0.8	85.3691	161.264	329.428	276.973	150.823	85.5783	89.1985	87.9791	82.0592	75.6808	72.0352	87.4555	78.9109	170.191	220.473	299.722	329.551	346.066	92.8332	88.9282	94.0478	84.4085	86.3423	217.615	257.364	348.35	482.076	158.628	97.0306	249.354	88.9837	85.7595	75.3491	74.0565	75.756	118.114	88.6843	130.694	257.545	307.283	215.116	108.632	122.445	85.9939	68.992	97.6615
1017	6	1.5	1	33.6144	32.7802	63.6953	80.1785	51.3298	25.2153	10.9887	15.6821	17.525	15.1574	19.0057	20.6389	17.5863	22.1639	22.9295	31.0681	65.7304	88.6937	63.2695	64.8071	17.9119	18.5501	52.0394	39.2086	41.694	130.331	107.262	69.2805	69.9995	48.4573	40.0608	41.5667	109.745	64.4498	37.2839	265.265	200.988	58.5582	48.6068	110.425	317.78	94.9954	43.0999	33.4772	27.9867	31.6607
[truncated: 434 more columns]

## Sheet: Storage(OBS inflow-No Demand)
grand_id	q1	q2	q3	1980-01	1980-02	1980-03	1980-04	1980-05	1980-06	1980-07	1980-08	1980-09	1980-10	1980-11	1980-12	1981-01	1981-02	1981-03	1981-04	1981-05	1981-06	1981-07	1981-08	1981-09	1981-10	1981-11	1981-12	1982-01	1982-02	1982-03	1982-04	1982-05	1982-06	1982-07	1982-08	1982-09	1982-10	1982-11	1982-12	1983-01	1983-02	1983-03	1983-04	1983-05	1983-06	1983-07	1983-08	1983-09	1983-10
753	1.5	0.9	0.1	20670.3	20663.7	20780.7	20939.4	20805.7	21094.4	21077.6	21034.4	21085.3	21097.6	21067.1	20821.9	20862.9	20883	21042.4	20692.8	20521	21636.1	21441.9	20990.8	20786	20779.5	20884.3	20928.1	20747.8	20890.3	21148.8	21251.9	21097.2	21711.8	22638.5	22042.4	21143.7	21097.7	21053.4	21046.5	21084.3	21106.6	21091.9	20950.3	20748.7	21117.6	21226.3	20960.4	20708.4	20636.9
870	1.5	0.9	0.3	20118.6	20306	20306.8	20241.6	19981.3	19930.1	19895.6	19943.2	19987.4	20123.8	20307.5	20274.2	20264.7	20305.3	20283.3	20079.4	19836.2	20041.2	20285.9	20289.1	20188.8	20079.7	19843.3	19922.8	20050.6	20322.2	20392	20606	20675.3	20868.7	20306.4	20205	20154.3	20250.2	20312.6	20296.5	20196.5	20303	20391.2	20304.3	20269.5	19995	19863.2	19849.4	20116.3	19945.5
597	1	0.6	0.8	17893.7	17569.5	17524.2	17545.5	18748.3	20724.8	21410.1	20551.7	19915.5	19247.6	18679.6	18149.6	17623.2	17322.6	17103.5	16787	16655.8	16903.3	16693.8	16264.7	16007	15953.5	15803.1	15588.7	15296.6	15164.4	15228	15241	16138.3	17500.2	17992.8	17574.7	17509.8	17519.9	17520.7	17518.2	17459.1	17518.5	17550.6	17545	18428.3	21830.2	25032.4	25045.9	24664.4	24311.7
307	0.8	0.5	1.5	16442.3	16416.7	16432.8	16469.8	16418.9	16905.7	17215.1	16869	16536.2	16432.9	16477.6	16432.3	16478.7	16479.3	16489	16446.8	16681.1	18324.5	18787.4	18422.9	17987.6	17681.6	17449	17238.6	16985.6	16962.3	17214.4	17355.3	17423.6	18586.1	19610.3	19462.3	19208.3	19050.3	18905.3	18781.3	18653.5	18554.1	18528.6	18363.9	18303.1	18386.9	18508.3	18348.7	18068.3	17821.9
1753	0.4	0.1	0.1	7560	7560	7560	7560	7560	7560	7560	7558.17	7558.81	7558.95	7560	7558.98	7556.43	7560	7511.9	7537.21	7323.14	7543.42	7559.74	7560	7559.04	7559.52	7489.23	7560	7560	7560	7560	7560	7558.59	7558.1	7559.54	7560	7560	7559.75	7559.8	7560	7560	7560	7560	7560	7560	7560	7560	7560	7553.46	7452.81
297	1.5	8	0.9	1959.23	1774.96	1671.9	1638.71	2628.53	2657.12	2346.91	2179.49	2063.89	1980.28	1868.81	1758.22	1760.59	1606.51	1542.52	1521.94	2174.19	2740.07	2664.42	2541.51	2332.32	2204.85	2078.83	1943.22	1788.31	1707.97	1670.74	1588.81	2022.52	2663.43	2662.3	2441.03	2348.29	2289.12	2169.69	2046.84	1956.11	1848.09	1793.87	1747.89	2196.76	2676.31	2715.62	2548.34	2385.47	2250.71
1036	1.5	0.7	0.5	2859.7	2824.67	2911.53	3035.82	3040.49	3083.07	3224.3	3177.13	3109.96	2981.33	2913.67	2823.77	2705.98	2663.34	2629.71	2590.23	2594.14	2609.84	2596.57	2614.44	2576.88	2537.15	2540.71	2526.19	2642.85	3168.71	3313.75	3393.55	3303.7	3413.39	3571.03	3545.71	3523.27	3415.89	3356.62	4422.51	4575.81	4601.55	4649.11	4783.14	4967.74	4691.07	4655.13	4644.19	4594.72	4416.6
989	8	1.5	0.5	1758.48	1812.01	2102.35	2630.28	2419.4	2361.26	2251.58	2182.46	2089.96	1980.73	1887.68	1808.3	1719	1645.52	1576.46	1503.64	1658.82	2626.82	2953.69	2484.63	2464.77	2459.06	2552.51	2541.59	2552.98	2753.05	2648.1	2483.66	2655.59	3411.4	2616.28	2553.02	2482.29	2429.28	2334.16	2673.03	2507.69	2543.92	2554.77	4016.74	3851.93	3125.58	2540.02	2389.73	2307.8	2299.69
1026	4	0.6	0.1	2044.21	2084.77	2190.17	2366.31	2359.31	2376.4	2378.4	2326.58	2258.61	2165.28	2108.97	2058.45	1980.74	1918.42	1879	1840.88	1882.86	2016.28	2136.8	2220.55	2224.46	2203.64	2225.63	2186.88	2245.01	2672.43	2741.18	2845.64	2847.61	2939.31	2933.05	2942.65	2933.19	2871.1	2802.48	3064.84	2906.01	2952.96	2961.95	2970.18	2965.02	2946.78	2965.14	2951.75	2937	2882.75
1848	1.5	1	0.2	2070.4	2128.95	2334.45	2696.54	2585.92	2485.12	2391.97	2280.39	2177.4	2112.62	2078.87	2042.65	1968.4	1958.05	1928.52	1951.37	1883.42	1899.04	1824.31	1730.76	1684.11	1612.33	1557.63	1517.59	1569.22	1632.91	1615.51	1694.31	1678.54	1637.49	1562.47	1527.5	1495.08	1563.4	1500.55	1869.97	2269.81	2349.93	2473.87	2723.22	2894.62	2940.98	2715.65	2564.73	2445.54	2362.77
1869	1.5	1.5	0.6	1347.9	1345.52	1642.54	1939.89	1725.12	1581.42	1475.05	1355.68	1304.25	1322.21	1308.99	1310.74	1286.33	1328.21	1329.68	1326.44	1290.04	1308.54	1292.74	1256.91	1236.76	1213	1192.66	1171.56	1268.5	1330.67	1333.76	1491.23	1354.8	1289.62	1285.88	1288.91	1302.73	1313.08	1311.63	1722.03	1943.99	1974.42	1924.71	2058.8	2120.02	2089.54	1940.78	1810.38	1680.22	1566.92
7313	1.5	0.6	0.2	1754.53	1759.02	1758.41	1764.82	1877.67	2179.17	2221.53	1817.62	1753.64	1758.37	1757.86	1757.6	1759.24	1758.08	1759.56	1758.91	1867.7	2484.89	2398.58	1956.76	1718.08	1746.12	1758.48	1758.89	1759.19	1759.38	1758.93	1757.08	1832.17	2268.08	2511.73	2219.18	1914.39	1794.88	1757.49	1758.68	1759.15	1758.56	1758.51	1760.4	1764.2	2005.29	2157.12	1894.5	1758.94	1757.02
1042	1	1.5	0.7	859.81	880.039	929.679	977.981	972.915	969.226	951.621	920.961	897.862	879.093	868.63	858.144	842.025	835.511	831.988	841.944	858.545	875.858	867.881	848.856	827.017	808.229	802.67	787.78	784.938	946.394	954.032	966.917	974.3	974.246	958.869	940.897	921.603	898.669	892.764	1255.59	1047.33	973.128	972.497	1053.71	1037.83	964.023	966.265	936.227	912.628	907.039
884	0.4	0.1	0.1	2342.64	2342.52	2340.08	2342.34	2343.23	2343.03	2343.6	2343.54	2343.6	2343.06	2342.32	2341.47	2323.65	2339.56	2343.39	2343.6	2343.55	2342.78	2343.6	2343.6	2343.22	2341.98	2335.09	2341.45	2342.68	2341.87	2342.47	2342.78	2341.31	2330.47	2343.54	2343.6	2343.14	2343.55	2343.6	2343.6	2343.6	2343.6	2342.97	2313.12	2336.9	2341.86	2333.12	2343.6	2343.6	2343.6
1144	2	0.1	0.1	1596.7	1607.17	1565.17	1573.32	1573.24	1574.16	1574.53	1577.8	1577.49	1639.1	1577.07	1593.07	1572.15	1570.75	1577.09	1572.35	1575.22	1897.62	1597.3	1574.18	1574.38	1840.18	2244.41	1939.23	1570.12	2202.25	2205.56	1695.05	1848.11	2288	2253.21	1810.88	1569.17	1577.75	1575.97	2234.13	2247.17	2196.66	2273.95	2128.27	1931.91	1691.62	1571.71	1574.64	1575.17	1575.81
1006	2	0.5	0.1	1205.4	1214.03	1258.27	1373.35	1383.33	1368.41	1339.26	1301.08	1269.04	1245.57	1230.65	1212.25	1189.1	1171.43	1157.1	1140.95	1149.48	1230.8	1341.71	1336.85	1314.92	1304.78	1356.22	1363.83	1385.59	1442.03	1441.68	1439.39	1443.31	1450.22	1428.46	1421.29	1434.06	1416.12	1400.85	1503.51	1443.28	1441.04	1434.12	1512.24	1555.93	1447.77	1436.05	1402.53	1372.2	1396.35
1048	1.5	7	0.1	780.153	776.626	772.734	733.65	713.074	731.134	796.298	792.115	791.122	798.259	819.3	784.146	781.712	781.109	807.252	786.997	776.283	755.118	761.621	767.315	760.209	776.435	753.845	755.374	793.491	774.463	753.484	756.812	719.885	616.935	682.339	729.98	760.83	775.057	797.704	781.109	779.829	780.301	764.129	700.662	711.441	723.57	728.024	745.31	773.007	763.292
1032	9	1	0.1	703.096	738.204	784.025	1041.03	908.936	792.666	750.93	729.826	727.689	715.008	705.863	698.861	685.495	675.252	672.283	672.646	711.561	762.305	761.271	760.266	764.397	762.465	788.587	766.701	769.507	820.534	810.539	771.913	852.286	1234.66	1178.99	983.53	859.182	769.974	765.65	773.654	780.86	915.339	874.384	1224.89	1283.68	1172.47	1056.01	884.197	775.459	799.41
355	2	0.6	0.7	1224.61	1224	1223.84	1222.95	1225.78	1221.22	1202.12	1178.44	1220.63	1223.16	1222.62	1223.71	1224.33	1223.48	1223.78	1224.62	1230.78	1308.62	1191.87	1129.35	1105.06	1152.32	1213.68	1222.98	1223.53	1222.93	1222.59	1222.86	1223.53	1241.36	1231.73	1214.34	1216.99	1220.95	1222.15	1222.49	1222.38	1222.59	1222.32	1223.3	1225.67	1272.25	1356.49	1219.27	1222.41	1222.92
1101	8	0.9	0.1	920.152	949.185	990.628	1120.85	1031.29	1031.71	994.354	943.992	895.134	864.786	849.413	880.25	828.747	834.513	832.025	871.225	828.886	911.716	913.869	871.457	856.471	810.834	784.466	750	747.98	842.785	869.868	910.089	939.23	894.341	870.527	847.403	854.511	812.924	784.114	965.028	1140.1	1138.63	1144.95	1122.21	1117.89	1110.11	1054.77	999.637	943.35	897.035
1023	5	2	0.2	649.144	646.9	649.856	754.393	643.726	648.894	640.951	643.208	648.58	643.425	640.611	647.904	648.771	648.581	649.325	650.044	650.146	646.724	646.668	648.349	648.222	649.629	678.082	646.899	648.839	655.551	646.742	647.088	712.482	750.337	637.144	646.92	650.754	647.17	647.264	650.995	649.76	648.946	656.236	904.563	640.962	646.466	653.731	646.469	651.079	648.749
1864	1.5	1	0.2	763.394	774.069	885.578	1064.23	1021.38	978.98	937.356	883.783	831.014	809.175	784.724	761.686	722.13	724.103	703.612	694.655	654.542	638.126	604.981	597.842	597.714	598.671	597.416	597.414	624.223	625.342	607.984	650.152	649.816	615.962	597.738	613.814	649.63	651.658	624.633	827.511	1002.67	1045.28	1061.21	1147.75	1212.54	1235.08	1154.74	1061.74	1033.13	999.55
1021	2	8	0.1	458.526	478.489	484.166	481.597	481.457	480.492	483.259	474.503	468.667	464.974	462.454	467.163	469.591	471.072	475.983	478.7	481.732	483.548	485.481	484.17	480.238	482.182	476.26	480.852	483.739	484.623	483.926	485.916	483.897	464.776	475.945	476.717	471.85	468.545	468.873	477.055	483.04	485.158	482.961	477.405	480.286	477.234	480.7	470.619	473.877	483.637
1120	2	1.5	0.2	442.76	444.282	444.895	445.345	446.849	456.31	450.108	444.125	441.148	441.478	440.441	441.391	439.93	438.605	441.635	442.806	446.855	460.916	455.139	455.937	458.917	465.225	460.576	459.404	458.387	461.142	462.137	460.437	507.123	517.915	495.593	465.28	459.14	457.355	455.787	458.063	460.886	462.782	461.249	461.214	468.975	462.474	457.859	451.746	446.895	505.757
182	3	0.6	0.5	932.561	858.462	854.451	749.332	750.353	752.67	743.992	684.326	670.492	662.991	638.332	664.305	665.971	709.539	743.271	754.328	726.215	605.495	386.137	314.821	318.021	321.819	453.441	838.352	953.604	913.419	1080.49	1102.05	1079.54	831.953	732.228	687.981	705.068	723.352	756.391	810.039	765.802	765.366	857.075	749.689	744.35	739.665	746.859	751.097	754.978	755.333
7311	4	0.1	0.1	698.568	701.715	719.796	732.643	731.45	729.402	722.969	716.13	710.136	705.448	702.044	699.619	696.54	693.579	690.94	688.543	691.425	711.365	709.507	705.049	700.463	698.56	709.687	711.963	710.938	714.612	726.882	731.504	734.206	744.976	726.179	723.76	720.25	716.224	713.645	715.61	731.272	734.079	733.5	745.772	731.28	732.798	729.515	723.175	718.409	720.065
1755	1.5	1.5	0.8	291.242	329.639	410.916	393.499	365.559	354.747	337.507	316.646	295.482	274.81	256.958	249.268	242.239	357.566	361.145	367.833	366.802	450.616	363.078	342.235	323.632	303.814	290.41	340.914	430.275	421.139	386.394	394.36	391.909	378.239	358.364	339.656	386.481	340.771	320.331	378.979	387.999	409.208	381.247	410.878	582.281	582.595	454.27	389.811	357.898	336.101
1192	5	0.4	0.1	625.602	625.446	625.243	630.93	628.082	638.624	602.255	572.766	548.865	541.212	539.932	557.458	561.675	574.204	604.76	620.454	632.688	626.118	617.069	593.005	583.756	598.189	633.483	642.537	640.497	634.949	635.25	634.93	636.311	638.46	629.621	605.903	583.962	586.499	601.102	632.181	627.571	629.438	626.586	630.907	643.206	629.124	630.221	614.54	592.361	574.499
541	10	9	0.9	139.057	134.925	131.116	151.585	270.602	317.203	281.289	218.06	200.071	190.189	176.555	169.428	159.125	150.478	145.761	141.97	147.889	183.132	161.428	148.221	132.763	122.592	116.392	112.767	110.995	106.998	107.002	121.475	186.779	297.64	282.132	259.965	270.85	271.266	253.713	240.748	226.585	217.074	213.77	216.043	251.857	326.717	280.544	263.678	240.358	224.904
1716	9	0.6	0.1	435.559	448.246	487.122	512.856	501.466	491.449	478.709	462.089	447.19	436.23	429.723	429.932	424.894	446.538	449.908	443.741	463.794	511.346	499.778	489.417	478.653	467.106	460.635	456.527	490.047	511.403	502.534	510.351	503.975	503.315	492.746	476.359	466.343	458.475	450.238	508.278	507.764	513.471	514.474	517.92	516.397	516.353	506.422	489.961	476.403	485.741
1883	3	0.4	0.1	507.733	505.131	506.069	507.637	506.541	504.503	506.369	505.816	495.29	491.497	500.367	506.669	506.381	506.399	506.545	506.348	506.454	506.966	505.986	506.27	506.345	506.523	506.679	506.532	506.689	506.419	506.562	506.096	506.355	504.989	500.627	497.8	487.111	478.952	471.421	484.599	506.919	515.865	504.296	506.429	507.871	506.016	506.195	506.092	506.194	506.619
895	0.5	0.3	0.1	665.216	665.712	665.273	666.1	666.1	666.1	666.1	666.1	666.1	666.1	666.1	665.914	661.596	644.007	653.306	666.1	666.1	666.1	666.1	666.1	666.1	666.1	666.1	665.29	663.949	655.999	600.81	666.1	666.1	665.546	666.1	666.1	666.1	666.1	666.1	666.1	666.1	666.1	665.396	658.922	666.1	659.241	656.789	666.1	666.1	666.1
1093	0.5	2	10	12.4466	23.1057	13.78	35.1465	23.3135	5.67924	1.00738	0.324904	1.13107	9.97615	12.9612	26.5252	6.56356	16.5362	22.0514	2.79463	15.531	5.44086	0.813745	3.92891	0.799494	11.0611	0.984791	5.60939	9.1792	4.5476	7.11164	0.987534	6.52412	0.629518	0.338142	1.74957	0.586953	1.9603	5.75315	11.7506	0.00323619	21.6649	17.8818	16.842	12.5329	0.274715	14.7997	0.838259	0.280903	1.38858
1709	0.6	1	0.8	456.429	500.933	509.869	509.845	506.035	494.782	490.429	488.729	465.741	412.297	385.339	431.235	408.493	456.341	509.802	509.9	509.887	509.898	496.238	500.947	498.809	465.412	498.065	508.831	509.722	509.9	509.9	509.9	491.807	507.42	497.419	471.863	423.493	388.172	385.422	492.828	493.62	508.035	509.9	509.9	509.899	506.458	487.688	468.253	398.447	340.64
1017	6	1.5	1	53.4044	57.8405	66.3801	77.8683	58.0795	51.0659	50.5503	50.9998	50.6345	50.543	50.5304	50.4464	50.511	50.7636	50.4949	52.4417	78.1053	81.8506	73.6167	69.5457	50.757	50.7249	66.6071	52.376	55.6949	139.072	117.322	106.244	103.215	91.7917	78.7349	81.8422	124.944	97.5054	80.6922	271.736	231.287	178.922	159.955	192.524	300.622	191.339	161.774	141.766	125.259	115.389
[truncated: 434 more columns]
