# Supplementary material for: The value of observed reservoir storage anomalies for improving the simulation of reservoir dynamics in large-scale hydrological models
Source: Copernicus journal article supplement (doi:10.5194/hess-29-4073-2025), 2025-09-03
Supplement: Supplementary file 12 [file WA_results_calibrated_against_outflow.xlsx]

## Sheet: Readme
	Sheet name	Note	Inflow source	Total number of reservoirs	Number of reservoirs where downstream demand is taken into account
	Outflow(WG inflow-No Demand)	Simulated outflow (×106 m3/month) where downstream demand is not considered for irrigation and supply reservoirs.	WaterGAP	100	0
	Storage(WG inflow-No Demand)	Simulated storage (×106 m3) where downstream demand is not considered for irrigation and supply reservoirs.	WaterGAP	100	0
	Outflow(WG inflow-With Demand)	Simulated outflow (×106 m3/month) where downstream demand is considered for irrigation and supply reservoirs.	WaterGAP	21	21
	Storage(WG inflow-With Demand)	Simulated storage (×106 m3) where downstream demand is considered for irrigation and supply reservoirs.	WaterGAP	21	21
	Outflow(OBS inflow-No Demand)	Simulated outflow (×106 m3/month) where downstream demand is not considered for irrigation reservoirs.	Observed	35	0
	Storage(OBS inflow-No Demand)	Simulated storage (×106 m3) where downstream demand is not considered for irrigation reservoirs.	Observed	35	0

## Sheet: Outflow(WG inflow-No Demand)
grand_id	q1	q2	q3	1980-01	1980-02	1980-03	1980-04	1980-05	1980-06	1980-07	1980-08	1980-09	1980-10	1980-11	1980-12	1981-01	1981-02	1981-03	1981-04	1981-05	1981-06	1981-07	1981-08	1981-09	1981-10	1981-11	1981-12	1982-01	1982-02	1982-03	1982-04	1982-05	1982-06	1982-07	1982-08	1982-09	1982-10	1982-11	1982-12	1983-01	1983-02	1983-03	1983-04	1983-05	1983-06	1983-07	1983-08	1983-09	1983-10
610	0.7	0.9	0.1	2204.19	4583.12	3663.81	2124	3935.16	4905.99	2053.4	1500.43	1484.12	1556.25	1510.86	1555.91	1541.14	1378.83	1864.78	1614.93	1428.72	1316.6	1158.29	1018.57	984.852	1017	983.662	1015.96	1015.75	919.812	1640.87	1215.69	1018.85	984.979	1016.3	1013.89	979.745	1011.13	977.766	1015.22	1020.99	1046.62	2420.5	2006.42	1098.79	985.79	1017.94	1238.72	1362.18	1464.94
753	1.5	0.9	0.9	1659.83	1511.45	1677.26	1647.25	1707.4	1620.92	1667.04	1648.36	1578.79	1630.65	1577.44	1630.52	1640.73	1479.02	1643.21	1610.09	1692.67	1711.17	1690.5	1627.53	1544.13	1595.84	1555.45	1593.41	1605.71	1452.56	1640.9	1757.87	1806.29	2686.85	2165.04	1666.12	1608.37	1663.66	1614.59	1717.09	2380.74	1871.61	2368.06	2376.44	3026.16	3278.76	1736.66	1659.13	1592.26	1646.88
870	1.5	0.9	0.7	2129.8	1933.65	2140.08	2074.15	2143.4	2067.39	2130.2	2113.34	2040.49	2106.84	2044	2114.21	2116.74	1912.47	2126.33	2050.15	2113.81	2041.99	2098.74	2048.04	1959.92	2015.38	1942.38	2000.72	1993.78	1795.33	2000.93	2308.85	2498.58	2211.3	2194.13	2166.39	2080.89	2145.5	2086.9	2149.1	2143.44	1931.46	2141.66	2083.42	2143.55	2062.48	2127.34	2127.99	2057.83	2124.54
597	0.5	0.9	0.2	1256.67	1951.77	2879.87	2607.95	2911.49	2162.25	2020.07	1873.32	1746.4	1844.22	1835.31	1625.82	977.049	837.371	877.583	904.27	1204.36	1135.81	883.984	707.665	624.989	651.888	738.793	812.917	798.315	704.302	1006.41	1236.01	1519.44	1592.34	1112.07	780.273	745.661	871.807	924.629	1004.09	1004.47	965.574	1344.98	1552.19	2293.4	3194.33	2554.45	1525.85	910.081	968.881
307	0.5	0.6	0.2	419.185	357.146	431.796	510.754	591.901	558.98	536.21	346.403	347.346	405.913	378.753	369.029	378.936	354.565	507.109	629.241	827.582	1258.79	613.236	426.177	391.488	435.363	468.57	490.05	485.307	440.931	679.485	964.795	1019.8	1102.12	871.824	545.163	480.606	510.348	523.792	539.78	555.778	502.945	560.575	562.901	574.339	547.283	481.964	421.083	381.924	445.226
1753	2	3	0.5	8948.47	8890.86	19591.1	11167.7	5645.72	3490.84	2459.13	2106.57	1985.42	2033.13	1921.54	2038.34	2093.83	7327.86	5886.18	5344.03	2859.53	2680.46	2115.35	1933.06	1718.47	4275.48	1790.03	1952.39	11994.1	13598.6	9375.77	5552.5	3684.77	2516.02	2204.71	2081.3	1962.47	1549.44	1496.45	11926.8	9913.21	10076.1	7336.34	12137.8	9646.83	6486.7	2764.55	2053.46	1731.68	1587.82
297	4	10	1	707.212	570.925	622.941	677.759	1757.94	1870.97	760.352	786.592	747.184	747.977	720.311	721.654	736.811	652.642	721.215	697.208	1541.53	2582.7	1998.05	783.097	718.666	742.257	693.695	693.181	642.628	554.192	1810.67	1679.54	2070.31	2325.77	1306.72	644.895	719.618	792.33	539.781	436.719	433.078	363.87	510.283	550.656	1038.44	1556.33	1472.82	789.415	619.847	495.304
1036	8	1	0.8	373.113	400.872	458.535	454.074	421.921	364.726	329.931	318.739	300.116	303.029	289.454	314.386	300.309	290.381	320.608	510.776	2160.75	295.728	267.231	230.928	214.652	220.595	312.325	273.127	473.95	932.449	494.07	241.337	216.867	325.171	485.956	464.948	465.506	452.022	450.102	1943.2	541.516	524.984	528.227	582.298	833.492	526.892	460.651	441.896	415.183	428.049
989	2	2	0.9	357.929	400.886	1108.6	1188.06	549.454	434.629	387.072	341.459	311.861	296.409	280.637	321.139	322.839	290.722	396.645	333.967	391.593	1693.19	1441.54	560.365	451.382	414.983	925.31	729.23	759.57	1710.75	769.755	600.934	884.266	1387.56	705.958	649.533	573.292	442.455	397.915	1386.65	658.464	819.622	780.333	3060.64	1667.06	682.089	561.947	456.655	394.736	697.204
1135	0.5	1.5	0.7	267.576	208.658	239.138	208.588	223.053	293.038	1218.84	938.631	236.956	484.503	214.551	498.377	255.824	143.833	338.402	259.652	234.755	337.889	246.427	178.412	148.04	1975.9	1000.13	435.875	278.795	464.719	470.887	347.246	1401.32	1803.99	828.225	486.368	347.813	286.162	225.047	233.757	284.633	477.793	676.733	520.256	465.145	465.53	325.456	220.436	166.782	1660.45
1269	0.9	0.3	0.1	350.403	341.582	489.446	1144.98	862.97	378.831	360.353	353.344	331.838	333.219	315.462	319.21	311.676	278.708	310.677	293.892	294.703	320.663	332.667	1326.96	2617.15	451.495	173.007	194.51	192.353	453.66	319.702	576.083	584.513	333.35	241.65	199.76	163.54	153.812	165.02	1859.68	1359.06	1269.01	1201.8	652.692	486.63	668.497	405.091	283.27	214.233	184.722
1077	0.6	2	0.7	232.94	219.233	248.326	237.526	271.835	369.254	259.857	255.739	241.804	244.143	229.888	234.677	228.068	200.875	227.787	218.196	217.496	217.167	218.997	208.052	196.876	2091.79	646.618	355.479	380.914	1339.37	440.994	302.309	1455.47	1205.5	472.044	327.554	270.51	247.017	214.295	378.829	303.676	1022.11	683.625	602.52	1017.46	472.176	338.37	262.21	220.004	1106.42
1026	0.8	0.5	0.1	381.273	473.909	605.998	592.773	346.25	249.422	102.058	92.9328	83.005	82.2649	125.412	259.036	145.205	270.53	236.422	153.727	336.455	407.155	174.454	245.659	117.74	211.579	424.337	267.954	259.753	1242.2	277.043	142.852	113.356	188.29	107.946	162.751	145.741	92.2408	136.092	1893.96	295.298	343.594	218.344	443.79	838.068	182.583	165.811	126.492	111.521	232.924
740	9	2	2	49.8915	60.0996	68.6161	63.3424	52.9236	36.7349	28.0571	22.7635	23.1934	27.1654	28.9309	33.3558	35.0826	31.8104	34.2991	31.5473	29.4592	26.3017	29.1281	26.7409	24.3967	27.5601	30.8138	34.4589	38.1302	38.3145	43.6135	42.037	39.9695	37.0956	35.7003	33.4304	29.449	34.6052	42.7394	49.9729	52.792	48.4359	54.6805	53.1256	46.4589	36.4268	34.6812	28.4572	27.6373	34.0073
1294	0.4	1.5	0.9	57.2844	48.3985	180.268	872.558	312.4	70.0438	60.1251	51.6505	53.6469	71.3503	65.7777	96.2427	84.7068	82.6953	181.648	146.843	174.396	581.393	204.596	172.232	158.735	163.178	225.773	162.515	154.907	146.201	115.535	95.9284	120.38	85.6277	80.8625	78.231	72.9705	73.2017	69.6512	75.2472	84.4121	96.6545	224.944	123.753	89.9192	89.5717	83.3551	77.3506	70.6567	69.9649
1848	1.5	1.5	1.5	136.019	127.042	314.227	238.615	134.746	126.696	126.665	122.05	113.558	113.605	120.781	143.173	121.025	128.265	132.616	133.161	118.832	117.303	115.696	108.125	100.156	99.4158	139.867	161.218	273.877	270.771	248.711	278.104	214.716	148.493	138.973	128.753	117.102	113.534	122.823	559.517	517.038	303.488	277.348	327.274	374.04	300.882	134.682	115.2	75.2872	64.4418
1869	6	1	2	506.672	659.104	521.583	493.053	220.089	208.179	207.317	196.268	178.276	175.187	162.668	270.165	343.813	356.682	496.075	334.637	144.309	115.089	101.511	86.7558	74.5422	70.8289	64.0622	62.3873	114.22	302.769	278.106	430.005	414.962	132.71	101.473	83.7708	71.9636	67.5218	61.7331	1158.48	1282.1	727.781	495.294	870.788	700.957	475.341	159.565	123.193	93.2348	85.9093
1863	1	1	0.1	113.419	105.524	569.521	123.037	107.835	104.201	106.177	103.575	97.4453	99.4183	97.7361	100.411	96.9855	103.805	112.61	99.8912	96.6969	91.3104	90.096	86.3739	80.3152	79.53	141.446	220.777	555.584	632.656	505.813	140.624	129.58	64.9063	58.3708	52.7083	45.6279	46.1421	55.0997	178.037	225.848	247.745	245.761	264.164	107.638	78.3683	64.7522	55.8593	49.0171	46.2807
1770	6	10	1	109.312	108.542	155.872	140.931	106.663	102.143	103.514	100.959	95.0544	95.309	89.4738	91.0399	92.0622	100.313	117.375	101.728	102.201	98.002	97.8079	91.552	85.6136	85.3449	81.2802	100.568	134.351	122.428	117.313	104.93	103.9	98.2321	98.8293	96.143	90.5833	90.552	85.6393	118.376	118.765	101.658	109.259	103.168	107.99	104.564	102.558	99.7728	93.8674	94.1459
965	4	8	1	84.9601	84.6319	97.269	222.198	140.07	91.4805	89.677	87.1419	82.5069	83.1299	79.2594	80.3865	79.1285	69.6745	78.4919	76.2565	79.658	79.4082	68.6131	71.7942	70.5774	141.926	139.045	172.223	141.039	178.157	359.796	321.422	355.704	697.587	797.046	98.2154	67.3034	58.1041	46.0201	43.9626	58.7551	91.2224	395.562	678.622	188.666	181.389	144.048	42.2809	29.564	29.3353
1247	6	8	1	122.294	103.274	113.155	105.967	109.854	108.218	101.929	95.3239	363.165	1122.29	94.3882	333.682	126.548	80.3268	117.369	103.735	96.6473	79.8706	83.1025	84.4123	78.9883	955.263	351.767	126.949	112.932	119.002	130.026	107.82	459.626	392.417	204.122	119.768	100.79	94.6703	85.3776	86.8368	92.8007	134.777	144.427	150.339	94.7868	92.6811	87.905	75.6839	68.8967	68.3833
7313	0.5	0.1	7	314.91	292.869	388.267	431.492	745.314	767.94	666.872	285.467	253.305	324.929	324.034	335.551	338.38	290.083	419.942	421.541	651.872	743.837	639.528	382.112	228.176	250.924	295.749	333.336	353.788	312.586	775.897	985.867	1576.1	1109.29	651.091	517.206	288.131	352.799	354.114	372.522	436.382	437.8	765.812	729.844	683.901	643.834	645.058	400.412	282.107	319.341
1287	4	8	0.7	388.072	456.824	516.524	460.168	523.229	400.886	403.668	387.771	354.633	376.811	358.247	357.935	353.478	301.513	1915.63	305.683	302.214	1850.31	572.537	383.262	315.472	1116.97	1158.4	625.718	380.06	496.66	532.936	570.459	1334.25	947.874	570.89	440.474	350.043	317.874	297.804	1299.17	627.13	1069.67	1177.4	781.423	780.917	596.246	422.107	330.614	284.157	250.293
1186	1	2	1.5	78.2787	117.218	82.0263	134.871	126.202	70.1448	64.2905	59.3024	53.728	53.8757	51.4766	52.838	51.8583	45.9001	51.2017	49.8842	52.8792	92.8671	68.2967	57.1783	51.8947	51.2365	52.022	54.7286	52.7254	63.6011	69.2772	56.1797	55.2414	50.9453	48.3163	43.5192	38.7921	38.1163	36.6416	141.723	96.5612	94.5796	118.049	80.9142	61.9123	59.0854	55.9487	50.4845	45.0915	44.1882
1042	1.5	0.5	0.1	91.3848	104.462	121.685	117.144	90.6779	75.1778	70.3018	63.8998	56.6466	49.0344	37.2486	39.1315	37.6256	45.1647	52.8678	47.9196	48.2454	62.4844	45.459	35.8651	31.1298	30.814	37.9092	36.3828	64.2219	218.162	152.232	44.1012	35.6035	42.676	37.0527	26.6006	22.505	20.5115	26.2396	413.646	202.318	64.6942	53.7262	97.1071	119.994	31.2348	20.7278	13.0766	12.5592	31.3331
884	3	0.2	0.1	3111.09	2462.85	2560.85	2560.55	3337.14	2530.19	2561.95	2368.47	2149.01	2177.06	2149.69	2177.04	2177.07	1434.48	2177.01	2150.88	2178.46	2150.5	2177.47	2100.05	2001.92	2026.12	1382.22	2026.14	2026.55	1950.39	2036.92	1403.6	2038.28	2028.51	2041.04	2142.59	2216.13	2245.15	2216.24	2243.99	2243.39	2157.4	2243.48	2227.91	2256.64	2224.05	2247.8	2296.87	2327.06	2351.15
1273	4	1	1.5	23.3894	20.888	22.3045	20.5703	23.5105	25.554	18.6428	16.3946	15.4938	16.9184	16.1291	27.2866	24.0135	20.3876	27.1097	27.0234	23.2915	25.742	26.2666	20.7655	18.5045	28.3443	29.1371	24.4421	23.7317	25.3495	30.1168	29.8265	39.3334	53.4048	45.5655	31.9895	24.6324	24.253	22.7372	23.3079	24.6637	34.2832	66.3316	38.0446	30.9127	24.4102	23.7919	22.4489	20.8509	21.1171
961	0.1	1.5	0.4	0	0	0	0	0	0	0	0	0	0	0	0	0	0	0	0	0	0	0	0	0	0	0	0	0	0	0	0	0	0	0	0	0	0	0	0	36.9186	40.6148	49.3255	140.061	89.5362	51.9996	31.8649	21.66	15.8886	13.7902
1144	5	8	1.5	1228.45	1422.93	1141.45	1189.52	1205.88	789.779	656.384	273.748	525.856	1309.88	949.221	1430.56	732.099	862.04	943.916	892.088	862.17	1900.7	897.598	878.801	626.349	2150.77	1697.85	1437.72	907.258	2393.19	1420.84	1009.21	2651.47	2824	1508.3	1068.7	924.368	879.853	856.383	4396.79	1406.87	1946.46	1839.46	1410.58	1672.02	1202.02	1021.88	928.007	665.072	650.032
616	10	0.6	1	1697.06	3250.8	3841.45	2692.04	2784.47	4717.97	2876.1	1673.49	1646.3	1693.75	1648.25	1742.42	1696.06	1554.58	1696.6	1601.82	1648.38	1600.12	1599.87	1584.39	1563.85	1564.53	1564.93	1611.72	1611.49	1427.93	1612.19	1519.98	1519.73	1472.6	1517.53	1437.19	1297.6	1338.26	1295.9	1339.74	1340.05	1210.67	1340.63	1297.42	1340.56	1296.36	1338.71	1336.68	2050.83	1388.48
911	6	1	2	597.323	454.928	658.455	633.77	392.867	409.121	255.727	205.267	209.466	166.486	164.047	159.09	147.217	178.049	159.377	172.957	129.89	112.953	153.027	123.962	109.105	101.478	115.382	181.134	125.63	415.895	1586.72	903.655	1280.74	751.996	671.761	480.669	413.426	437.346	649.226	1163.63	661.258	1253.45	2285.26	2381.96	1291.9	1031.77	1012.78	609.534	462.108	493.525
1006	0.7	1.5	1	65.4095	80.2463	100.503	95.4987	71.6796	60.3968	56.2204	50.8981	45.2074	34.4701	22.8765	27.1689	24.262	28.957	36.358	27.5256	37.8778	98.1739	58.0991	32.7536	27.9006	30.3067	89.2159	40.9365	50.2473	156.551	59.8506	34.2276	30.5481	41.7669	32.1324	40.3327	51.1306	26.3419	26.2162	188.48	41.3843	36.5942	33.7198	116.565	157.821	40.3716	32.2897	28.3606	24.7036	80.9231
1048	10	1	0.6	399.959	810.608	923.053	1640.44	1431.92	1152.45	597.366	482.779	400.022	382.711	347.562	348.498	328.098	293.311	332.329	296.139	274.341	265.951	270.704	261.259	243.293	242.078	249.655	271.693	272.335	918.668	538.805	390.131	1134.59	1361.02	659.299	499.372	395.677	348.013	302.731	347.425	304.599	521.52	788.787	1154.44	925.23	919.051	650.197	529.019	452.142	694.445
1123	1	0.1	0.1	76.6583	98.0433	89.1728	68.9289	72.1761	63.8817	51.1036	44.6885	43.2141	119.468	67.5995	88.7304	56.7232	69.1804	78.468	58.6063	65.3964	130.774	76.9567	46.4538	36.2364	31.7717	36.729	45.4324	52.4018	170.195	115.763	42.606	120.478	142.816	33.7996	25.3852	16.5132	16.8379	17.3224	231.278	60.269	65.102	84.3205	48.0262	178.657	40.4449	31.8179	18.5438	12.5681	16.0012
1032	4	1.5	0.7	116.172	168.731	245.912	312.322	221.083	171.587	145.84	124.882	108.069	100.13	87.5725	83.409	75.7184	65.2172	82.79	82.2997	89.7014	139.263	120.138	87.6914	73.1219	68.3335	175.137	173.171	126.808	227.592	205.52	156.305	199.17	699.752	262.667	181.587	152.09	136.171	116.645	136.214	207.798	252.928	277.241	678.086	507.777	279.7	213.185	177.24	150.816	175.707
1774	1.5	1.5	0.8	244.626	459.275	1010.14	489.054	322.127	238.637	243.798	237.653	221.865	219.432	202.122	198.982	189.642	191.71	261.832	252.276	246.42	241.598	234.803	220.011	200.007	192.759	174.453	173.209	234.981	626.076	850.423	312.081	247.817	236.661	239.766	232.268	225.862	222.863	218.061	250.771	431.731	723.715	531.642	637.689	523.057	266.86	245.559	240.732	225.216	222.673
1781	7	3	0.9	462.819	693.953	1806	944.55	452.073	226.033	196.02	189.471	175.566	172.114	157.065	157.974	156.699	429.111	639.896	633.221	227.81	294.196	191.388	182.689	166.37	160.073	143.696	721.401	1015.43	1755.38	1278.66	652.623	410.07	237.929	151.01	182.531	93.2671	81.4424	156.747	544.357	715.825	1548.93	1429.58	1543.36	834.246	378.656	196.867	133.547	97.0698	82.0219
355	8	0.3	0.5	188.684	148.194	182.09	286.751	525.124	375.668	136.964	69.2079	53.306	51.3278	138.805	215.507	191.852	150.498	210.336	352.829	499.665	431.922	166.26	105.914	81.4509	72.7171	69.423	154.885	171.557	145.785	198.258	283.409	421.624	385.301	172.132	67.7028	50.1883	48.7417	153.233	241.176	269.441	238.314	335.715	391.287	763.268	498.39	453.257	182.085	165.309	203.765
1101	3	5	1.5	122.341	113.857	252.909	231.397	118.884	112.977	111.61	104.931	94.8183	92.2088	90.2268	119.688	106.362	108.449	118.138	117.911	105.102	98.5742	134.021	139.387	118.031	107.842	94.9259	75.0868	95.4432	230.889	170.936	193.711	115.73	73.2944	59.1526	49.6582	43.5357	41.2406	40.2164	460.013	527.605	244.943	125.716	298.252	287.277	268.985	75.5352	57.8001	46.2258	43.2138
1023	2	10	0.6	301.677	515.038	736.319	1086.8	1009	800.237	306.183	257.187	219.987	205.437	182.657	185.922	173.851	154.267	170.481	158.073	184.232	178.55	135.191	106.427	92.6582	88.9775	86.8145	90.492	89.7678	108.632	137.279	107.828	118.753	188.072	119.414	96.8875	88.7846	89.7753	83.8164	83.3254	81.0708	73.7792	86.0247	844.799	413.814	323.339	256.936	230.859	193.717	190.24
1060	0.8	1.5	0.7	43.9414	49.5802	71.0445	79.573	36.6381	31.529	28.1614	23.7368	20.0509	18.8707	17.6534	52.4265	33.8366	41.1818	64.1839	41.6105	55.0352	71.1297	41.5623	37.7871	33.0007	31.4478	96.2309	52.7174	51.9792	148.602	73.9778	36.6987	30.7159	47.6628	47.5605	28.4932	24.1369	21.8717	25.9723	239.722	83.3439	84.6434	52.3465	51.853	121.893	63.9706	42.0879	35.5615	30.974	29.6849
1864	1	1.5	0.9	89.9393	82.1727	807.16	281.936	104.687	85.2132	85.5516	81.4318	74.3357	74.5869	72.067	83.3269	81.5293	76.0696	87.5218	83.2033	81.4927	75.5174	73.9617	68.9764	104.446	183.312	147.401	93.3693	151.486	209.342	134.399	285.92	182.803	66.2825	54.262	51.41	62.911	66.963	77.168	582.973	146.219	168.475	236.231	529.631	459.677	96.0037	88.0671	85.3376	78.7903	77.867
1797	8	3	0.5	3292.01	2860.1	5454.71	2823.74	1797.57	1256.82	1126.72	1071.85	1007.15	1001.94	933.891	975.016	994.689	2740.8	2078.72	2343.16	1107.38	1254.19	1070.01	1032.22	555.461	463.194	373.225	582.669	3297.02	4233.94	3180.12	1637.23	1153.83	1081.1	1084.28	1063.81	1011.44	993.877	1215.04	3520.58	2307.51	3676.55	2937.59	3512.59	2297.32	1647.67	1058.35	927.474	830.22	807.034
305	0.9	8	0.6	1633	1277.71	1805.15	2222.17	3575.4	3594.22	1944.44	1175.59	1399.32	1417.3	1782.91	2426.23	1774.67	2191.86	1756.56	2237.13	2840.23	3128.87	1685.33	913.392	1009.44	1590.45	1619.42	2140.54	1379.91	2266.43	3224.68	2933.25	2572.74	3038.35	1969.93	894.316	1192.91	2102.86	1744.45	1769.52	2270.8	2198.68	1880.26	1792.62	1764.01	1763.6	2239.72	1331.68	1248.26	1269.44
968	5	2	0.3	49.1626	45.7308	103.753	526.798	255.362	109.748	57.0426	51.8754	65.2661	59.6589	66.0477	59.522	59.245	55.9595	59.0167	57.972	145.76	55.2165	49.9238	56.5466	49.9473	57.5356	56.9633	57.859	57.6017	62.946	77.2105	62.8768	130.956	104.305	67.1692	43.3476	40.3161	34.1359	38.9426	33.026	32.8865	43.4442	89.0131	166.7	81.0162	163.157	67.4797	51.2854	57.3065	66.7525
1019	9	3	9	62.6398	73.7666	127.229	122.427	65.3181	49.2907	139.153	106.466	79.6961	64.84	44.9806	4.83795	4.81882	18.4076	22.937	13.0835	40.8193	71.5828	19.2544	12.256	8.75589	6.7342	5.64328	5.14962	13.4843	143.782	100.372	30.3094	13.308	9.0018	7.10165	5.41871	4.74102	4.68923	4.45699	232.535	100.834	34.7075	29.6181	77.7752	112.951	19.3241	8.76216	5.91076	4.32142	3.86156
1302	5	1.5	0.8	21.1019	15.5845	16.5925	15.3454	15.0046	13.9223	12.0969	12.9426	17.8863	25.7799	24.4271	39.4106	36.2282	31.7147	73.9592	43.7072	37.2691	204.265	106.172	22.0069	19.7164	20.1234	21.064	19.9419	17.9707	16.4461	18.2508	15.7381	16.289	15.6837	13.5741	14.5767	14.1956	14.9045	14.5452	16.39	19.0432	22.7868	40.7277	30.7569	16.9383	16.263	16.1987	16.2291	15.2959	15.9901
1824	9	0.7	0.1	8267.85	6980.24	17684.7	7959.06	4834.11	2805.64	2175.63	1829.82	1665.32	1836.61	1665.8	1898.91	2157.11	6786.52	4633.94	4733.69	2258.18	2109.04	1661.85	2032.09	797.464	759.75	698.461	1978.03	11504.5	9857.1	7448.01	4486.33	3005.52	2199.74	1816.34	1897.51	1568.03	1414.32	1544.95	11233.7	6213.68	8421.45	6704.28	9937.4	8198.76	3346.64	2298.47	1770.59	1494.79	1347.08
1316	6	0.1	0.5	0	0	0	0	0	0	0	0	0	0	0	0	0.510976	0.739937	1.32499	1.83044	8.88165	36.3472	43.3345	8.65566	6.55061	7.14809	12.4403	6.82949	4.74496	3.31718	4.05228	2.24054	1.68566	1.92878	2.22926	0.200895	0.153365	0.142632	0.13373	0.129667	0.13415	0.138078	0.170042	0.171718	0.215251	0.200888	0.172699	0.118339	0.102415	0.104267
1835	9	0.7	0.1	7220.23	6067.04	14733.2	6427.39	4028.22	2393.34	1911.85	1612.91	1456.54	1589.7	1360.77	1531.59	1804.06	5944.34	3981.56	4164.92	1904.17	1900.25	1398.65	1807.24	742.618	620.318	608.589	1663.86	9423.47	8745.76	6586.12	3491.69	2438.04	1914.74	1762.2	1611.04	1437	1316.71	1363.62	8853.5	4986.73	7058.52	5469.38	7572.37	6127.03	2821.65	1891.32	1552.18	1296.12	1170.44
1847	0.3	0.1	0.1	5992.68	5016.29	11593.6	5294.08	3059.36	1985.65	1595.41	1364.69	1224.42	1196.46	1130.51	1359.44	1478.36	4957.97	3340.7	3607.68	1639.23	1724.88	1154.04	1481.74	792.012	610.462	499.22	1336.88	6846.02	7607.44	5768.34	2458.99	1797.41	1764.52	1378.71	1335.62	1263.3	1192.76	1565.35	6743.44	3763.88	5929.86	4608.1	5656.84	4066.62	2661.27	1480.05	1286.09	1136.58	1068.77
1231	4	8	0.8	69.3398	88.4477	76.2269	65.6593	65.7963	59.3422	54.6182	49.1616	43.5478	42.5476	39.6136	40.0326	38.6759	33.7929	36.7274	35.4413	40.0371	148.792	98.446	57.4304	46.9616	47.406	68.9765	71.9738	60.2686	59.1021	66.6587	56.4492	55.7	53.7419	49.6982	42.0105	34.7484	32.3901	31.2514	171.415	92.418	78.3582	120.877	76.1753	63.9505	60.313	54.7585	46.7459	39.97	37.0429
1140	6	8	1	5.05688	4.56226	4.9127	4.61025	4.78936	4.75299	5.15369	6.45622	6.07779	6.48259	5.93277	7.23944	6.38108	5.51178	6.50289	5.86588	5.8633	5.74434	5.99554	5.91548	5.5401	5.60654	5.39825	5.51118	5.47113	4.90939	5.39407	5.18335	6.26485	9.06996	10.8896	5.4387	5.09363	5.13148	4.92687	5.08897	6.42882	19.3553	9.90667	6.03667	5.05499	4.84135	5.03435	4.99351	4.68074	45.2974
1296	0.9	10	3	20.1063	25.0239	20.8989	18.9069	19.52	19.1274	17.2252	16.2374	15.2262	15.2387	14.2775	14.53	14.4427	14.4193	16.5223	14.9606	14.8849	29.0924	24.6513	16.322	14.7849	14.9636	29.3068	21.1514	17.2675	15.5808	17.24	16.2636	26.1542	22.1359	16.3571	14.8989	13.7468	13.7125	13.0227	28.6053	21.9306	32.1048	38.5578	33.953	28.5334	31.0925	17.9962	16.3819	14.8297	14.6731
1659	0.9	10	1	21.0282	24.2372	47.6244	39.4708	29.5705	25.2895	23.6541	22.0862	20.1909	19.5451	18.0556	18.8491	19.2409	29.9731	31.4919	27.5316	40.8128	35.595	25.6739	24.3484	40.7609	26.4522	23.3413	23.3871	28.1989	50.5051	82.8065	45.2534	33.3044	29.0444	27.8491	25.8989	23.6011	23.1934	23.3662	44.9771	36.4249	31.5575	35.0909	45.7631	44.6469	38.4983	34.5023	30.2495	25.7943	27.6551
1277	3	1.5	0.7	1.93432	4.15118	2.045	2.28978	14.066	7.67791	1.20464	1.11984	1.03692	1.10645	1.02531	4.43479	6.74137	8.28833	17.3354	14.2384	6.57302	29.3182	19.2066	2.26332	2.94014	3.23256	2.21363	1.40601	1.80716	3.26422	3.28838	3.96233	9.98243	2.35106	1.32289	1.20187	1.08814	1.0682	0.998544	1.12561	4.42742	13.8841	17.5093	8.47431	6.59206	2.88017	1.37742	1.25326	1.12399	1.09906
1021	2	1.5	8	42.9147	128.194	146.675	144.605	118.137	106.658	102.923	76.1268	33.6329	32.612	30.0051	29.7948	28.655	24.8739	26.5539	24.6298	24.5677	24.5659	23.5341	21.9945	20.1504	20.7179	49.6384	42.7424	35.035	54.4601	65.8431	53.5395	98.6213	141.766	123.456	91.8361	36.682	35.3634	32.3739	31.9994	30.6832	31.2978	82.7319	168.115	123.498	117.858	107.323	104.659	96.6738	94.5671
1280	1	0.1	3	24.7024	21.8842	23.8042	22.5481	22.9101	21.9614	21.0504	19.8416	158.664	224.729	78.635	148.843	124.271	82.2071	150.791	74.7458	49.5991	33.7763	24.697	24.4478	23.5264	69.8451	36.7209	30.7133	29.2417	32.9518	25.6137	23.9414	24.7073	23.9019	24.7193	24.3759	23.2932	23.8425	22.8878	23.5014	23.4045	21.5529	24.0094	23.1977	23.4007	22.3853	22.5343	21.7737	20.2901	20.6379
1120	6	8	1	16.8317	16.4065	18.67	18.3037	18.588	17.9921	17.6658	5.8725	2.06473	1.98347	2.73175	2.72266	1.46257	1.36377	1.4056	0.973721	0.606359	0.579931	0.588857	0.576096	0.553369	0.569441	0.562389	0.593178	0.606653	0.963545	3.22067	2.16041	27.8112	52.9555	20.4658	13.1889	11.4322	8.4971	9.68152	8.04066	8.14704	7.24065	10.2077	9.13776	10.0078	6.3732	1.64663	1.98531	0.790634	40.5033
182	0.4	0.7	0.2	441.381	595.674	216.29	128.57	80.7177	74.6801	72.9211	68.8947	63.0903	61.7961	31.9699	20.9145	25.754	65.3467	82.7086	79.8487	77.015	70.4014	66.8255	50.2954	11.1707	19.2726	49.8817	425.509	295.973	474.541	408.012	488.086	159.073	79.7952	80.7471	75.7399	70.835	71.2718	238.075	457.026	397.609	510.923	695.356	290.288	149.093	90.84	78.5574	75.3368	70.8963	71.1195
7311	3	1	1.5	8.19206	28.921	64.0832	52.734	14.7103	11.7411	10.4232	8.71277	7.14342	6.29309	5.37943	5.00869	4.60675	3.77323	4.07791	4.07977	4.13923	7.54332	13.2224	10.7022	8.68135	7.57134	22.8936	24.4412	23.0002	42.482	22.3331	15.5742	75.1019	72.9496	29.1259	15.7049	12.6095	11.4759	9.74651	11.8635	18.2607	73.5062	34.3682	124.58	30.7987	21.3494	15.5828	11.9898	10.1762	9.14799
1755	0.8	1.5	0.3	86.2679	79.7409	172.455	108.994	38.6504	22.7165	18.0626	11.0393	8.49992	6.57129	10.8426	17.7197	25.0834	142.93	82.808	66.9863	38.7193	170.608	23.5356	15.7642	12.7487	13.5915	21.1916	98.7857	195.584	187.895	91.2873	72.3531	48.5579	26.3183	20.0423	18.4628	89.1959	13.2715	17.0689	115.013	118.453	110.898	42.2123	134.432	233.885	207.499	36.8	21.9278	15.6882	20.1281
1152	0.1	2	1	0	0	0	0	0	0	0	0	0	0	0	0	0	0	0	0	0	0	0	0	0	0	0	0	0	0	0	0	0	0	0	0	0	0	0	0	0	0	0	0	0	0	0	0	0	0
1192	7	6	1.5	243.065	347.566	240.71	231.773	313.86	152.865	127.296	110.755	101.626	145.116	98.6821	102.027	148.033	98.7129	107.495	153.295	101.803	237.381	141.414	105.128	93.3341	91.4113	94.1138	99.5949	144.273	165.909	189.807	112.586	106.692	97.7723	90.2561	47.3006	44.7739	80.6353	79.7031	461.235	228.967	335.696	203.43	210.945	177.31	115.155	106.792	96.5661	49.5469	88.9633
541	9	9	0.3	76.4164	87.8856	88.927	73.849	641.6	452.884	203.502	176.019	105.423	100.229	89.4469	83.9748	74.7826	85.5782	81.5743	124.9	278.176	159.086	108.852	93.893	69.6433	59.1658	51.4544	31.0726	18.074	14.7383	15.275	51.968	377.219	294.739	171.5	106.315	95.8318	90.3153	78.8331	84.2414	92.282	69.2115	64.135	55.2949	291.105	241.725	201.016	178.682	104.841	96.1844
1822	10	0.8	0.3	5027.52	4058.6	8851.12	4293.59	2512.52	1689.59	1401.88	1216.21	1079.38	1041.95	1022.49	1223.64	1329.17	4264.67	2761.03	3095.76	1407.06	1534.96	964.86	1145.73	717.93	480.226	466.191	1116.15	5329.49	6475.86	4783.06	2004.22	1611.01	1381.43	1324.46	1255.89	1179.74	1101.62	1381.9	5647.41	3417.09	4743.92	3682.71	4896.65	3447.22	1968.94	1378.3	1149.24	999.92	944.349
972	8	1.5	0.4	64.8954	190.283	597.89	413.406	147.121	101.426	73.7594	51.7419	30.5642	28.0352	26.9098	27.4562	26.9954	23.9198	25.9402	24.6316	26.4546	27.6677	27.6971	27.3743	25.9916	26.1326	24.6722	25.0733	24.6017	22.6031	27.2025	27.2292	27.3251	26.57	27.5676	27.2282	25.8034	25.9911	24.4917	24.6738	24.0706	21.8972	26.2189	198.878	75.5623	55.9849	42.7727	29.2171	27.0339	27.459
613	1.5	1.5	1.5	132.313	153.683	253.989	364.353	1395.52	821.658	360.448	137.034	106.518	103.458	134.389	143.72	131.069	107.059	136.078	246.231	279.319	190.676	86.6827	56.5593	42.9887	30.8487	27.5455	27.1583	35.7395	55.9768	168.941	232.933	365.022	340.13	136.76	72.6169	55.1819	50.0513	55.4885	83.0893	80.0705	87.1403	247.156	287.247	482.716	456.725	262.856	118.284	78.9621	69.9476
1086	10	5	6	2.22087	2.13866	2.38796	2.15995	1.95939	1.57682	17.1074	15.7354	14.1169	14.0525	15.5389	17.4985	16.3162	14.0192	16.2363	14.8728	10.8616	6.71077	6.27755	5.65205	4.94116	6.71664	1.01675	1.09786	1.11181	1.05936	1.3691	1.12284	0.751274	0.381518	0.387234	0.381434	0.363901	0.490111	0.81827	1.20778	1.70802	8.0993	13.0047	12.1396	2.64394	0.33475	0.339588	0.334359	0.317609	0.579784
1295	9	0.5	0.1	28.8837	32.122	30.5005	28.4376	28.2027	26.7409	25.6083	24.2174	22.4039	22.5524	39.0187	48.0555	48.048	50.9992	49.5701	41.8282	45.6733	72.0942	64.0765	43.1924	31.5022	21.4125	89.1152	39.78	30.0647	29.5619	37.5007	49.4118	106.231	44.8131	28.3091	23.789	19.5733	19.3214	40.6832	150.583	97.7408	108.205	126.638	69.9974	60.4057	70.29	27.0385	25.018	23.3959	22.3185
1139	10	10	1	2.63005	7.25612	1.78937	1.38617	1.32791	1.28203	1.31451	1.30471	22.0708	9.00724	23.8144	32.3303	6.15436	25.4295	29.7835	9.97813	9.48686	9.093	1.71911	1.32935	1.28637	112.923	13.9484	9.45727	14.1292	15.9403	15.1713	7.74895	89.0576	66.8379	14.6939	9.80585	8.2329	7.44998	7.06541	16.5211	21.1688	19.3726	15.4409	12.1532	7.56807	4.41014	1.32979	1.32657	1.27989	5.6736
1862	2	4	0.5	555.232	493.703	1849.47	428.079	300.737	153.2	154.963	145.51	129.154	126.485	127.449	136.109	302.065	380.395	241.008	293.583	150.6	148.058	141.712	127.17	324.778	163.941	94.2682	63.251	911.598	1252.53	468.361	331.399	264.734	114.339	79.9078	86.9367	54.6669	77.1596	144.54	922.589	534.235	803.664	544.535	732.465	267.338	148.663	104.946	78.184	71.4073	60.3103
629	6	1.5	0.3	1931.04	3772.33	4263.69	2138.1	3175.22	4703.71	2562.5	1799.06	1669.44	1749.26	1742.26	1752.46	1749.16	1649.2	1768.38	1663.81	1656.88	1644.87	1724.18	1684.77	1554.21	1631.28	1554.55	1637.27	1714.11	1503.34	1582.07	1559.98	1621.19	1469.79	1612.69	1465.32	1316.84	1329.97	1324.53	1539.47	1401.74	1312.74	1577.9	1286.12	1266.62	1248.72	1311.31	1664.15	1316.01	1531.9
1000	6	2	0.7	21.1565	32.9949	46.3635	39.8875	28.9314	23.3183	21.6634	19.5696	15.269	15.0559	17.8935	31.332	20.7875	27.454	36.3878	21.2018	39.868	61.1026	44.7771	27.9884	24.3635	23.9521	37.1063	37.3234	38.1462	51.8775	42.8489	31.424	28.4888	35.5409	29.7551	26.8581	27.244	24.4859	23.3972	92.7823	35.8234	30.0766	29.847	128.611	60.1595	31.4105	29.3941	27.3949	24.8914	34.7101
7306	0.2	0.1	0.1	7582.47	6408.59	14469.3	7639.08	4198.06	2460.34	1961.95	1895.31	1475.6	1494.93	1415.32	1542.27	2153.93	6058.19	3890.67	4558.61	1768.28	2172.46	1199.62	766.305	737.922	701.995	736.382	1699.58	9084.83	9057.67	7292.37	3842.7	2526.12	1932.5	1839.79	1866.25	1191.11	1424.05	1395.31	9067.42	5372.38	7267.63	5686.84	7500.71	7359.68	3011.87	1936.1	1559.7	1452.74	1113.69
991	0.8	1.5	1.5	46.0291	46.6672	160.342	126.279	70.2957	50.0814	50.5863	49.3525	46.1341	45.6948	42.3279	42.5987	40.7685	35.0095	270.254	38.4557	41.1561	60.2259	55.8523	55.8639	47.1729	44.757	132.267	135.229	65.4865	118.137	101.51	75.1435	66.2355	216.976	95.9797	62.8063	49.8651	43.2622	35.7318	32.0926	28.3103	34.5074	57.6594	374.73	124.543	90.4376	76.7727	54.9428	41.9608	36.2803
7317	0.9	8	0.5	134.832	184.572	354.354	125.592	64.7549	38.8697	30.6897	23.2912	20.7626	16.1031	15.9707	14.6425	21.7857	116.639	57.6412	52.8312	31.3941	27.782	24.1775	17.8972	13.6663	13.5049	12.5757	50.3435	259.719	237.828	113.315	63.0345	37.1383	29.4771	29.1609	26.0614	23.0445	18.6304	21.4204	238.142	141.677	163.078	64.9305	235.321	187.374	115.015	37.2848	28.8792	24.5834	21.5921
998	8	0.4	1.5	202.078	163.794	139.984	525.663	711.137	341.147	21.3406	50.6963	134.438	160.867	144.592	136.119	123.139	100.435	148.958	97.587	54.0651	12.2058	11.2285	8.09942	6.56477	7.58752	9.03028	9.24771	9.25513	8.5142	10.1092	9.79537	9.12489	7.66185	10.4013	11.1803	11.096	11.7068	11.6066	12.1082	12.3036	11.0389	91.9176	292.083	144.588	58.4852	12.7628	12.7652	28.9367	108.135
1716	6	1.5	0.7	57.2695	66.5918	123.683	118.227	60.4094	46.9488	40.6165	34.2428	28.1368	25.7632	23.4845	34.7218	35.7856	78.6163	69.3018	40.0044	80.1316	135.844	52.6396	43.3023	36.7364	32.5834	29.1191	32.1916	160.701	381.647	187.856	78.6578	50.2304	48.7658	39.3152	31.4895	25.9424	25.084	22.5631	467.18	193.127	108.156	83.3335	152.874	408.595	127.841	58.509	43.3261	37.0537	70.4039
1896	8	0.9	0.5	588.08	484.857	1151.19	520.306	407.218	277.606	233.196	205.901	206.888	249.483	213.076	203.214	188.746	637.369	354.582	279.768	204.936	213.983	186.466	183.056	173.513	170.478	160.657	162.845	333.278	724.654	392.295	504.57	274.771	238.606	220.489	212.013	181.429	186.403	178.835	527.92	444.949	487.197	595.032	461.955	307.039	238.747	197.782	202.742	222.969	187.672
1883	0.8	2	10	120.737	128.636	486.293	149.088	70.9146	63.2937	55.966	49.2982	42.4222	41.2032	48.3926	78.4391	77.7257	109.7	112.988	57.9435	48.8656	41.7562	61.5185	57.775	45.01	37.1227	30.2934	31.0032	293.947	178.371	118.082	66.0781	81.9079	54.4428	47.8678	50.8585	64.6962	55.6912	45.5018	78.0166	226.1	194.793	249.206	152.78	94.8978	60.3718	54.374	47.8801	41.9865	56.234
1285	2	1.5	1.5	12.0798	7.03993	9.366	11.7104	35.4343	31.4936	10.273	8.60644	6.91139	6.11501	5.23779	19.8419	15.0688	15.1954	20.2605	10.5771	9.79299	106.845	28.4749	7.22326	7.37376	7.38759	7.61926	6.18885	5.14342	5.05668	4.82646	5.42693	17.2139	7.55582	4.82822	3.80751	3.31499	2.94733	3.0902	5.09295	8.51702	43.6405	44.394	13.8258	14.5007	9.08484	6.15679	5.59749	4.22992	3.78285
1266	0.8	1.5	0.6	9.53134	27.7347	14.5808	12.2604	27.1358	15.0318	10.3836	8.99229	7.30164	6.35595	5.2726	4.79624	4.22385	3.53714	5.31286	6.09068	6.43907	9.83782	9.38537	7.49893	8.55567	9.50787	7.54417	6.36411	8.1784	7.95278	9.32068	9.55397	15.1527	13.29	9.11347	7.65125	6.0706	5.24132	4.45977	41.0181	16.1914	111.632	52.0474	25.9047	22.2587	26.4406	10.8028	9.38874	8.03969	7.06117
1176	3	0.6	0.1	25.9178	14.584	15.5787	14.3334	15.2377	18.4677	23.2162	25.143	51.1729	222.754	131.323	142.179	28.7862	20.5975	27.7975	23.3836	23.7832	23.0027	25.6436	25.1517	21.5677	47.3702	26.1949	20.84	19.9817	20.2274	21.9526	19.3309	97.7164	156.145	59.3982	49.6555	27.0096	24.1207	20.6964	20.2155	21.0612	82.4256	27.3854	22.7164	22.022	23.4683	26.2037	26.4789	23.0044	128.667
924	2	1	0.6	26.813	21.2446	28.0156	28.8767	24.7204	25.391	24.4065	22.4981	24.4354	127.006	209.361	189.803	34.6534	54.3934	44.5469	23.6032	21.7376	16.5597	157.115	47.6979	12.7899	9.9191	11.328	16.5213	9.85142	110.463	121.637	70.06	46.0724	61.7467	68.8573	48.5561	27.4012	23.9693	46.7465	106.396	36.5079	60.8992	53.824	155.324	32.2622	21.4905	14.7775	10.4943	8.35916	7.99579
758	1	1	1.5	66.2779	61.7966	67.9813	65.3812	66.7764	62.6983	62.6509	61.8283	60.0874	62.2762	60.593	63.0268	63.2262	57.1408	63.1259	60.9429	62.6997	56.3468	53.364	51.8534	49.5555	53.118	53.3353	55.7908	56.6994	51.5931	56.6659	55.2128	55.8243	57.6191	62.5119	62.1227	58.5339	61.8425	62.39	65.629	65.8596	59.498	65.0885	62.1119	62.1074	58.2632	59.7391	58.2939	55.2949	57.8191
1257	0.1	10	0.2	0	0	0	0	0	0	0	0	0	0	0	0	0	0	0	0	0	0	0	0	0	0	0	0	0	0	0	0	0	0	0	0	0	0	0	0	0	0	0	0	0	0	0	0	0	0
895	0.6	0.6	0.1	2904.07	2586.78	2942.76	3062.72	3446.56	2449.38	3170.85	2561.33	2038.09	2474.51	1886.17	2404.52	2091.29	2515.41	2052.34	2015.22	2542.97	2029.66	2525.35	1932.73	1921.79	1942.42	1932.07	1960.37	1959.56	1898.67	2387.4	1983.56	2411.68	2036.43	2500.02	2467.83	1982.53	2519.52	2489.46	2537.4	2584.28	2053.45	2994.5	3123.1	3683.86	2666.57	3060.99	2579.08	2522.44	2951.87
1317	0.9	9	0.1	29.8414	21.1222	21.8281	19.8143	220.357	93.5886	5.08764	263.58	27.9736	22.4268	13.3906	18.2702	16.5452	7.70392	6.56141	5.18776	12.8384	77.8484	56.1794	20.9642	17.3068	34.3329	38.7154	14.8883	11.8354	10.9166	13.6349	11.5221	10.7817	9.92798	9.30959	8.14538	6.66169	6.87481	7.06338	7.74479	6.62752	4.08407	4.58488	4.09285	3.36176	2.90628	4.87446	6.44237	4.34419	4.88233
1242	3	2	0.8	3.36385	2.94904	2.95909	2.84376	2.89062	2.71126	2.63501	2.43515	226.883	199.534	46.2621	49.8173	48.2243	37.6049	33.845	27.9754	7.61907	2.81907	2.79641	2.83494	2.90671	2.98082	2.83743	2.94279	4.11029	5.73408	3.01708	2.85016	2.89944	2.68359	2.53642	2.30602	2.0829	2.08326	1.98509	2.19808	3.69718	81.0716	19.8489	31.2009	2.94481	2.7453	2.61293	2.33682	2.09163	2.17926
107	0.6	1	0.8	105.984	79.1422	86.6758	69.4216	56.5437	46.7947	42.8815	37.9455	32.52	14.5995	11.1676	39.0543	52.0542	74.0386	79.4604	58.9844	42.8779	20.4175	13.1835	12.0371	10.772	10.439	22.0993	146.985	157.803	160.471	136.606	113.204	95.9698	85.7634	68.3266	48.2075	42.1693	39.3026	34.9783	96.3448	110.094	125.55	215.781	103.098	96.916	86.2158	68.3272	48.2603	42.2481	39.3303
1841	3	0.3	0.1	68.862	119.43	316.456	143.47	104.694	98.0528	91.3871	55.0088	43.8726	41.8627	37.2757	38.2743	35.2789	67.322	75.7755	68.5936	47.2105	45.5803	39.8195	35.1905	30.6942	24.3856	19.6651	24.3866	112.372	135.56	126.44	100.161	99.3221	78.0949	47.2895	43.8349	38.3984	35.8883	34.4881	124.02	104.683	112.479	108.388	115.865	96.026	75.0482	52.0124	46.4834	40.9218	38.166
907	2	1.5	3	163.097	215.781	291.925	238.319	156.043	125.165	102.911	99.3465	94.6562	97.7065	92.6247	92.9268	89.2754	77.7502	91.0664	88.2025	91.6307	84.1735	83.7089	283.005	106.386	98.4582	93.5845	92.1201	77.8241	81.3624	488.565	401.253	330.184	410.546	276.184	212.85	158.55	140.913	171.077	362.986	263.766	449.979	591.405	1032.57	537.33	291.195	283.328	175.618	139.966	172.639
80	0.6	1.5	0.2	540.202	218.508	285.472	215.506	165.604	138.346	89.2763	52.1694	42.4111	37.7821	110.859	250.997	243.09	205.855	235.04	248.509	170.603	179.312	113.834	58.5276	45.4716	97.3472	130.977	466.144	286.332	533.852	407.435	333.679	199.315	127.634	103.073	58.0012	55.5541	92.5028	170.937	323.775	452.875	520.195	414.182	298.242	175.656	146.956	148.138	71.2004	58.9519	34.3467
1236	0.2	0.9	1	0.604568	0.432609	0.499538	0.483709	0.496671	0.527055	0.516506	0.420303	0.338212	0.336536	0.317999	0.458	0.713129	0.640791	0.801279	0.980766	0.976581	0.878514	0.846555	0.711916	0.587757	1.80674	1.88982	1.17874	1.09932	0.991462	3.42992	4.5256	4.43652	5.05394	6.43197	4.82084	4.14403	3.78688	3.33958	3.22669	3.11078	2.89901	3.5536	3.96509	4.23671	3.89197	3.66072	3.21233	2.75254	2.59879
981	9	7	1	124.501	136.689	296.351	478.42	171.318	121.402	114.604	113.021	105.919	108.621	103.689	106.834	105.81	95.0607	105.156	101.099	111.26	84.262	32.3353	28.9531	27.3395	27.5137	26.0053	26.3992	25.9145	23.8052	27.3397	26.1317	26.2286	25.5786	27.0536	27.8599	27.0907	28.1597	27.4163	28.5071	28.6819	26.3183	46.3874	82.3319	52.6146	44.4333	67.5606	65.6884	62.3596	64.417
1093	1.5	1.5	1	20.5025	26.9085	34.6244	31.5204	36.5153	26.6619	16.4945	9.99822	9.25026	13.1405	14.2985	26.2852	24.868	41.0459	54.5764	36.2963	59.9274	96.1716	41.0514	30.1437	20.5088	23.0986	22.8015	23.7987	35.0651	235.169	81.9301	34.0463	58.6947	117.374	38.0425	29.4927	20.5618	19.0856	19.1481	132.079	86.5164	60.9054	61.1077	48.1247	213.677	33.9065	32.4076	21.1928	14.9056	14.2713
1709	4	7	0.9	71.1135	51.7899	117.841	110.904	61.0271	50.3297	51.013	49.8928	46.3546	44.8559	40.8041	41.4174	93.5066	112.004	320.06	80.2634	73.7122	158.399	41.0169	26.8337	22.1541	19.3981	24.558	38.3712	109.792	205.124	183.548	57.8428	37.0401	62.9322	57.3038	35.3782	18.6462	14.6383	17.9831	42.715	44.7932	103.703	98.2653	113.416	124.466	83.7092	37.8683	25.2176	15.3435	13.2757
1017	1	1.5	1.5	20.1405	35.8837	84.1654	66.5245	28.2333	18.9943	11.4071	6.34308	4.82968	3.50802	3.42605	3.12693	3.08944	16.3163	21.6041	10.6565	22.2468	64.7486	28.5869	15.7565	6.30024	5.63765	5.84349	7.92256	38.7511	202.87	156.194	61.5741	35.4357	22.4259	17.6263	16.1771	39.9375	29.5038	25.3035	477.405	162.122	45.3576	49.336	95.5558	137.396	45.3077	28.3918	22.5727	17.7237	15.3117
1194	0.9	0.9	1.5	19.5936	19.8314	25.0768	21.5908	19.7036	16.9708	14.4051	10.6521	4.81331	11.1997	9.51924	12.9636	10.9365	8.23315	11.5126	10.7388	10.7273	9.0893	6.69587	5.98033	5.14865	77.8622	96.2011	25.5866	20.9192	30.6681	24.6599	19.769	66.2923	64.745	28.6346	20.4071	15.0034	12.8322	11.1837	9.7634	8.68937	8.73347	10.3611	9.57623	10.2039	8.63921	6.66232	5.33097	4.53426	3.98356
[truncated: 434 more columns]

## Sheet: Storage(WG inflow-No Demand)
grand_id	q1	q2	q3	1980-01	1980-02	1980-03	1980-04	1980-05	1980-06	1980-07	1980-08	1980-09	1980-10	1980-11	1980-12	1981-01	1981-02	1981-03	1981-04	1981-05	1981-06	1981-07	1981-08	1981-09	1981-10	1981-11	1981-12	1982-01	1982-02	1982-03	1982-04	1982-05	1982-06	1982-07	1982-08	1982-09	1982-10	1982-11	1982-12	1983-01	1983-02	1983-03	1983-04	1983-05	1983-06	1983-07	1983-08	1983-09	1983-10
610	0.7	0.9	0.1	36700	36700	36700	36700	36700	36700	36700	36700	36700	36700	36700	36700	36700	36700	36700	36700	36700	36700	36689.4	36561.3	36428	36320.5	36233.1	36156.9	36098.2	36326.8	36700	36697.9	36613.3	36433.8	36215.8	35963.3	35760.2	35588.7	35455.1	35543.7	35922.6	36495.9	36700	36700	36692.1	36572.5	36426.3	36641	36700	36700
753	1.5	0.9	0.9	27450.3	27544	27673.1	28132.2	29186	29901.4	29964.9	29287.8	28613.9	28128.3	27772.2	27432.2	27220.2	26996.7	26794.9	26689.3	26795.7	28186.7	28382.2	27759.9	27048	26506.1	26121.9	25723.8	25441.1	25194.2	25114.8	26264.2	28619.1	30126.4	30218	30020.1	29664.1	29603	29840	30092.6	30220	30220	30220	30220	30220	30220	30139.4	29592.7	28975.8	28612.2
870	1.5	0.9	0.7	26174.4	26345.2	26486.9	26661.7	26697.2	26694.7	26486.7	26170.7	25892.4	25703.2	25649.7	25611.6	25563.6	25508.3	25478.5	25392.4	25209.9	25014.9	24677.6	24159.1	23556.3	23077.9	22659.2	22303.8	21940.6	21570.7	21267.2	22431	24190.4	25172.3	25476	25572.3	25649	25844.5	26160.1	26415.3	26640	26782.8	27026.5	27594	28260.6	28539	28588.3	28607.5	28703.8	28877.7
597	0.5	0.9	0.2	17435.9	17691.9	18512.5	18703.3	21341.4	24093.3	23976.5	22370.2	20879	19697.8	18700.4	17738.8	17323.7	16984.6	16545.7	16282.6	16782.1	17020.7	16366.5	15453.2	14608.5	13933.7	13550.1	13247.6	12911.5	12589.1	12720.6	13200.2	14214.4	15481.4	15283.9	14568.7	14052.1	13799.7	13719.3	13736.7	13711.8	13852.1	14649.6	16098.9	17481.1	19284.7	18952.4	17688.1	17156.7	16950.7
307	0.5	0.6	0.2	10792.6	10615.3	10503.7	10542.1	10563.6	10543.2	10337.3	9855.52	9587.75	9461.95	9415.93	9413.04	9412.96	9415.46	9454.83	9701.36	10279.3	11756.8	11453.8	11019.8	10683.9	10542.4	10530	10507.6	10482.4	10471.4	10860.3	11908.6	12857.5	14620.6	15303.3	15045.3	14829.3	14767	14819.5	14882.7	14994.4	15069.5	15164.1	15292.9	15361.2	15343	14997.2	14490.5	14017.8	13815.3
1753	2	3	0.5	7553.24	7560	7560	7560	7560	7560	7560	7524.14	7327.89	7220.01	6978.96	7229.79	7284.7	7560	7560	7560	7559.93	7560	7416.86	6772.54	6078.99	4402.72	1723.44	1263.19	1978.41	868.82	622.184	674.646	669.649	697.863	707.313	717.154	719.558	718.149	726.19	1827.91	937.037	1138.64	615.046	1429.14	1137.82	1192.08	691.244	705.069	715.625	717.557
297	4	10	1	6519.27	5991.88	5606.02	5587.07	7185	7434.2	7384.35	7337.08	7397.41	7274.96	7129.51	6817.37	6719.74	6535.82	6386.2	6260.19	7076.32	7434.2	7434.2	7359.06	7138.31	7008.19	6699.54	6356.13	5905.89	5515.75	5086.91	2997.69	2809.74	2713.16	2514.14	2252.48	2363.93	2446.29	2289.52	2144.46	2038.46	1920.2	1934.08	1953.6	2409.08	2721.78	2793.46	2557.87	2495.35	2333.61
1036	8	1	0.8	3336.21	3448.7	3541.25	3665.42	3668.53	3599.23	3460.05	3324.28	3199.09	3092.92	3000.43	2941	2850.62	2815.86	2763.36	2677.2	1117.15	560.037	520.514	493.608	470.481	453.078	488.252	448.554	456.398	469.653	126.939	56.8836	54.2441	155.586	217.63	219.972	229.491	217.648	235.693	210.153	4.53104	25.4757	18.3906	76.2472	215.939	80.8835	69.5497	64.9541	62.2858	71.8128
989	2	2	0.9	1903.96	2043.7	2493.17	2513.13	2465.59	2446.18	2358.37	2250.5	2154.02	2041.6	1957.41	1927.99	1872.28	1848.93	1903.33	1855.86	1937.81	2529.08	2380	2344.76	2353.76	2334.94	2502.67	2522.89	2530.18	2590.24	2457.23	2537.57	2531.01	2522.06	2528.66	2535.81	2528.01	2493.94	2462.37	2610.27	2514.64	2532.85	2532.74	3173.76	2499.59	2520.11	2533.72	2510.13	2452.21	2455.64
1135	0.5	1.5	0.7	2967.91	2886.59	2816.89	2709.84	2644.07	2693.93	2282.57	857.072	590.49	576.258	493.813	550.044	424.573	399.636	528.596	481.756	502.9	594.228	536.973	500.549	483.899	515.163	110.214	45.3674	11.4733	220.873	224.267	208.915	350.828	91.5336	14.5753	0.0366211	0.619781	2.07829	15.2531	62.9493	118.503	342.439	444.581	464.98	492.888	550.459	507.747	463.942	436.564	450.37
1269	0.9	0.3	0.1	5339.7	5939.98	6233.35	6287.7	6287.7	6280.34	6174.24	5986.63	5751.5	5551.77	5393.27	5235.8	5065.64	4937.77	4828.4	4680.31	4540.71	4620.34	4629.68	4264.22	1942.6	591.23	574.935	566.045	568.041	560.883	494.789	521.648	509.836	398.136	381.179	383.925	362.741	383.234	429.717	495.603	266.815	309.43	74.8855	10.8851	101.063	254.843	164.405	167.871	178.709	176.282
1077	0.6	2	0.7	4004.59	4042.35	4114.94	4133.67	4330.7	4718.57	4682.28	4571.06	4437.54	4319.69	4187.73	4088.75	3965.96	3850.2	3810.45	3752.89	3670.23	3647.19	3570.33	3463.03	3364.31	2218.97	1800.14	1850.06	1833.39	1724.66	1720.06	1757.72	1746.43	1737.33	1798.85	1839.98	1840.09	1819.15	1789.18	1805.98	1855.76	1776.73	1836.47	1792.61	1766.07	1729.94	1768.16	1734.97	1685.83	1678.19
1026	0.8	0.5	0.1	1250.36	1181.18	978.255	798.74	538.451	435.393	422.059	423.587	423.806	424.566	425.015	442.814	428.496	423.78	420.011	421.485	450.666	419.564	419.132	422.529	421.47	437.265	479.639	433.059	451.282	728.657	413.278	421.778	422.959	423.841	422.726	429.339	426.164	423.845	440.665	1060.68	422.727	446.217	422.08	461.512	535.308	419.472	421.462	422.633	423.131	460.242
740	9	2	2	1022.89	1003.38	959.928	888.438	791.042	725.719	702.722	737.543	831.778	853.726	872.716	877.385	858.731	836.353	803.914	779.95	751.304	815.617	867.333	868.636	900.908	972.82	972.721	983.188	1002.33	1004.72	974.77	944.544	917.017	906.557	919.22	932.192	924.316	1025.8	1039.55	1021.4	989.677	950.471	932.181	886.066	820.052	807.357	823.992	824.213	917.603	981.637
1294	0.4	1.5	0.9	2842.63	2817.77	2781.13	2197.39	1604.96	1540.35	1500.79	1453.06	1423.82	1416.72	1401.06	1432.88	1429.39	1443.74	1518.49	1553.19	1564.71	1557.24	1536.75	1563.47	1566.52	1566.08	1565.46	1567.47	1566.67	1566.65	1567.09	1575.08	1571.64	1547.2	1536.05	1522.14	1506.84	1492.04	1477.87	1471.35	1477.25	1522	1562.17	1549.44	1541.52	1550.94	1542.25	1527.5	1508.92	1490.2
1848	1.5	1.5	1.5	3182.6	3241.23	3494.97	3708.11	3659.44	3552.44	3432.91	3309.58	3186.04	3082.37	3068.77	3150.83	3080.57	3155.57	3145.65	3180.89	3092.2	3038.88	2955.38	2852.11	2757.03	2662.57	2559.32	2437.46	2489.14	2500.2	2435.6	2460.52	2327.07	2186.3	2054.92	1936.98	1822.69	1721.75	1648.46	2009.26	2035.69	1968.57	1883.28	1926.32	1932.81	1836.69	1681.46	1567.71	1475.62	1421.07
1869	6	1	2	2205.56	2161.65	2356.47	3253.69	3316.23	3211.33	3071.99	2905.97	2734.9	2590.62	2454.33	2315.01	2039.53	1840.19	1647.61	1383.15	1253.83	1177.87	1099.3	1015.71	945.815	882.619	826.498	776.53	797.477	931.997	910.513	1080.37	1060.52	927.828	862.878	807.057	757.555	715.318	675.618	1354.18	1254.37	1280.08	1239.83	1370.05	1289.14	1144.04	1018.64	947.294	880.1	827.738
1863	1	1	0.1	2819.96	2998.68	3121.35	3142.26	3118.33	3098.98	3041.53	2957.17	2869.77	2809.46	2766.37	2722.11	2661.61	2751.36	2783.16	2748.29	2673.3	2606.61	2519.62	2434.83	2355.51	2274.76	2188.35	2011.68	1979.99	1771.81	1393.42	1240.73	1208.1	1159.33	1125.67	1098.05	1063.22	1043.45	1034.84	1161.53	1181.35	1229.1	1224.88	1217.22	1150.94	1126.03	1090.34	1052.44	1027.64	1000.98
1770	6	10	1	2660.1	2796.22	3001.48	3146.7	3127.24	3072.04	2998.74	2915.87	2833.22	2751.22	2672.18	2604.75	2548.14	2615.7	2697.37	2699.03	2675.94	2656.1	2607.49	2538.44	2471.48	2402.06	2342.94	2352.11	2522.2	2773.99	2948.97	3000.29	2955.44	2894.53	2820.33	2745.55	2674.83	2596.44	2526.67	2656.37	2774	2854.79	2895.5	2909.53	2948.89	2987.48	2924.82	2848.54	2772.02	2696.95
965	4	8	1	2367.14	2399.35	2482.33	2774.5	2784	2778.77	2730.08	2652.69	2581.95	2511.9	2450.16	2390.23	2331.87	2274.86	2231.21	2190.06	2158.05	2131.85	2061.17	2015.67	1974.77	1890.19	1768.34	1677.39	1552.55	1498.55	1490.45	1345.34	1306.82	1186.4	350.931	209.2	199.488	192.166	184.205	180.404	188.624	213.563	225.714	138.738	3.20418	21.7667	13.1026	0.00481382	0.0587035	1.76012
1247	6	8	1	2327.71	2275.84	2224.89	2161.74	2112.93	2072.94	1993.66	1905.75	1785.05	1129.22	889.881	963.943	908.538	909.363	963.74	975.696	987.753	983.97	981.474	977.288	972.273	994.606	858.891	835.102	859.833	918.534	961.388	981.488	994.067	995.38	971.588	968.623	978.266	984.017	988.451	995.33	1009.23	1021.64	1019.46	1003.77	1001.12	1015.44	1008.75	991.769	975.529	960.633
7313	0.5	0.1	7	1266.83	1246.59	1328.94	1508.61	1756.06	2153.45	1985.83	1574.64	1384.69	1354.12	1331.56	1309.34	1292.24	1255.54	1397.41	1534.93	1894.83	2502.79	2285.45	1742.37	1432.38	1295.95	1261.5	1257.26	1267.08	1273.61	1725.4	2264.61	2529.9	2529.9	2383.51	1900.22	1618.28	1609.92	1611.2	1634.33	1723.96	1754.2	1955.22	2200.7	2356.63	2371.86	2131.23	1725.98	1519.37	1457.52
1287	4	8	0.7	2079.06	2447.09	2522.5	2522.5	2522.5	2511.87	2431.63	2286.06	2116.3	2095.69	2045.82	1970.51	1905.9	1804.31	503.421	171.965	191.708	113.74	0	1.03002	24.6508	88.8391	0.631538	23.3968	7.52477	177.85	182.289	179.833	118.193	38.1216	0.0381355	8.51191	14.5259	40.805	77.319	84.6413	0.0228995	101.135	107.244	43.0452	36.9023	14.0675	4.13181	19.2123	46.56	53.3848
1186	1	2	1.5	1519.25	1689.12	1694.46	1738.8	1726.18	1700.82	1666.87	1621.82	1574.7	1537.51	1503.53	1472.3	1437.47	1405.37	1376.63	1346.83	1326.71	1406.01	1382.39	1350.87	1323.34	1298.22	1284.95	1267.13	1246.19	1267.21	1264.92	1247.18	1230.34	1206.79	1175.53	1137.95	1098.51	1066.62	1042.38	1224.61	1246.87	1335.43	1426.13	1442.36	1419.78	1403.02	1372.73	1331.91	1289.54	1251.05
1042	1.5	0.5	0.1	1538.61	1496.88	1438.9	1382.03	1302.78	1234.03	1164.11	1097.03	1035.41	983.924	949.363	919.444	887.065	866.474	838.453	808.481	782.869	766.257	726.783	695.125	666.461	643.699	627.951	605.324	602.105	669.305	558.458	505.373	483.122	475.629	451.211	429.138	412.655	398.021	392.667	542.524	357.496	293.421	268.63	273.238	259.336	243.7	244.014	244.085	244.258	251.643
884	3	0.2	0.1	548.741	513.52	533.913	534.287	500.271	509.635	528.244	563.855	598.396	581.064	579.91	585.931	595.379	591.657	590.982	573.837	566.808	567.796	580.413	583.815	626.79	609.693	590.533	593.211	603.847	604.44	619.692	605.847	586.925	580.834	588.986	592.842	579.701	569.127	567.414	572.727	572.852	559.167	575.488	543.927	579.881	550.932	572.891	578.199	543.092	584.063
1273	4	1	1.5	1292.68	1299.49	1300.22	1297.97	1305.87	1316.8	1292.31	1263.71	1241.55	1229.72	1216.47	1244.79	1251.53	1256.26	1278.53	1300.11	1301.99	1321.73	1329.95	1315.43	1302.27	1331.75	1360.3	1367.19	1372.35	1396.55	1426.29	1459.25	1544.66	1616.13	1617	1616.03	1613.83	1609.59	1604.01	1599.23	1601.49	1616.53	1617.41	1617.13	1617.87	1615.72	1604.39	1587.34	1569.25	1553.21
961	0.1	1.5	0.4	0	0	0	0	0	0	0	0	0	0	0	0	0	0	0	0	0	0	0	0	0	0	0	0	0	0	0	0	0	0	0	0	0	0	0	0	6.99378	13.6979	16.4531	70.1852	46.8234	32.3053	25.2135	21.761	20.6472	21.9669
1144	5	8	1.5	785.352	792.037	780.208	791.416	796.566	807.688	833.568	837.143	822.12	811.258	807.888	805.367	796.045	820.314	801.69	820.925	809.84	768.885	804.534	809.134	826.483	801.261	731.702	793.535	802.473	743.795	767.627	791.424	780.304	681.705	747.296	794.272	803.829	823.78	816.196	762.975	711.197	783.486	732.583	785.554	781.929	776.495	807.726	800.407	821.542	826.468
616	10	0.6	1	1498.41	1705.72	2242.89	2014.83	1673.87	2242.9	2028.85	1497.84	1500.18	1502.22	1497.78	1498.67	1498.32	1499.23	1497.69	1500.24	1499.83	1500.78	1499.42	1499.44	1502.13	1501.48	1500.49	1499.56	1503.5	1501.65	1500.38	1501.62	1500.75	1501	1503.2	1446.11	1395.36	1361.17	1333.8	1310.46	1285.73	1263.32	1237.96	1195.47	1125.68	1032.9	941.166	876.079	113.069	104.288
911	6	1	2	208.445	195.799	195.82	191.57	200.567	201.136	204.381	207.895	207.343	209.343	209.726	210.211	210.048	210.588	209.17	209.443	210.496	211.184	210.412	210.434	211.085	211.22	211.437	210.005	209.871	287.129	244.013	183.446	205.215	175.005	193.2	196.979	200.81	201.167	202.059	211.843	187.142	291.254	175.111	163.096	163.351	176.986	178.837	190.971	198.742	199.267
1006	0.7	1.5	1	1195.78	1182.19	1155.36	1128.68	1072.36	1022.65	967.217	912.921	866.003	828.057	813.548	805.737	789.632	790.851	789.565	776.482	787.506	825.105	806.429	793.811	780.586	777.293	817.498	806.019	818.094	868.409	816.167	806.806	797.533	814.572	796.156	792.53	805.477	782.676	776.938	864.879	802.73	807.382	798.449	840.756	854.611	804.624	792.749	773.156	755.095	789.214
1048	10	1	0.6	2063.1	2063.1	2063.1	2063.1	2063.1	2063.1	2063.1	2063.1	2063.1	2063.1	2063.1	2063.1	2063.1	2063.1	2063.1	2062.94	2047.94	2053.55	2008.62	1917.01	1822.98	1735.75	1827.65	1987.68	2017.04	2063.1	2063.1	2063.1	2063.1	2063.1	2063.1	2063.1	2063.1	2063.1	2063.1	2063.1	2063.01	2063.1	2063.1	2063.1	2063.1	2063.1	2063.1	2063.1	2063.1	2063.1
1123	1	0.1	0.1	906.098	899.283	853.215	815.502	786.068	746.356	703.109	662.403	631.13	648.543	592.994	580.173	532.692	519.473	491.373	459.038	443.627	447.825	386.04	355.091	332.894	316.434	307.67	293.307	282.093	302.337	229.75	197.566	234.67	208.486	196.147	196.732	196.981	197.119	198.51	267.567	197.791	204.7	202.474	196.681	233.376	195.93	197.245	196.934	197.056	197.901
1032	4	1.5	0.7	360.368	419.889	490.792	646.756	631.993	603.603	556.083	505.771	463.656	423.654	386.417	353.896	318.786	292.279	280.119	264.47	262.451	296.105	274.08	249.827	226.96	211.815	309.021	305.255	293.111	423.317	410.841	396.703	475.904	653.674	532.762	508.195	486.433	459.595	432.279	441.749	499.945	634.54	695.226	715.889	712.337	675.783	660.501	626.599	591.547	615.29
1774	1.5	1.5	0.8	1524.5	1819.82	1900.8	1900.8	1900.8	1883.87	1830.68	1745.3	1648.16	1546.56	1443.43	1345.79	1251.35	1254.43	1385.38	1524.92	1572.76	1668.71	1626	1529.96	1422.9	1312.09	1208.44	1122.2	1226.14	1841.58	1900.8	1900.68	1887.59	1842.17	1770.87	1679.47	1632.35	1548.5	1507.03	1688.39	1896.62	1900.8	1900.8	1900.8	1900.8	1898.66	1862.98	1787.39	1690.46	1584.77
1781	7	3	0.9	1728.68	1900.8	1900.8	1900.8	1900.8	1900.7	1891.34	1827.96	1736.8	1637.11	1535.26	1464.22	1418.92	1674.35	1900.8	1900.8	1900.59	1898.5	1851.02	1753.24	1640.98	1522.93	1409.67	1017.92	699.426	596.001	557.214	289.282	215.695	184.277	185.963	190.167	187.255	187.75	208.792	474.66	615.364	645.098	622.143	591.27	303.025	199.94	185.183	186.788	187.143	187.92
355	8	0.3	0.5	358.224	333.082	335.415	443.894	739.808	778.568	580.259	416.178	331.243	288.728	322.291	339.873	316.09	297.061	312.547	447.617	770.691	1062.47	847.97	656.48	523.7	448.449	402.956	421.534	402.151	381.953	389.601	469.145	630.68	711.296	536.099	371.49	282.062	245.966	296.138	325.097	348.734	354.156	417.957	563.13	1229.83	1729.13	1454.27	1147.36	1025.13	994.21
1101	3	5	1.5	1303.35	1346.1	1517.95	1706.71	1693.33	1640.63	1559.9	1467.87	1375.59	1293.18	1236.63	1268.53	1238.91	1269.32	1277.07	1305.1	1265.46	1230.46	1173.8	1055.76	945.819	846.148	759.735	687.398	675.272	699.165	663.356	681.162	649.889	617.864	583.75	550.781	519.648	491.631	468.707	740.845	753.84	670.684	636.294	722.331	745.245	692.924	617.783	580.007	543.841	513.473
1023	2	10	0.6	1637	1637	1637	1637	1637	1637	1637	1637	1637	1637	1637	1637	1637	1637	1637	1637	1637	1637	1637	1637	1624.47	1566.92	1564.91	1577.57	1566.65	1593.42	1637	1636.68	1635.79	1636.97	1637	1636.07	1620.33	1578.43	1520.03	1459.07	1406.51	1386.07	1418.78	1631.12	1637	1637	1637	1637	1637	1637
1060	0.8	1.5	0.7	295.769	307.028	318.396	329.19	304.072	293.767	277.753	259.77	245.916	237.733	229.923	252.055	231.001	243.069	252.676	241.024	257.067	270.86	250.889	248.849	239.607	237.512	287.613	266.91	268.557	378.762	329.57	311.543	300.512	313.765	300.96	282.039	268.098	256.335	255.588	477.028	409.048	437.46	410.768	409.871	482.177	449.75	426.091	404.198	385.128	370.971
1864	1	1.5	0.9	1297.99	1444.11	1493.58	1496.8	1496.05	1472.1	1419.31	1348.09	1273.32	1218.57	1179.6	1203.32	1204.25	1229.11	1273.05	1295.58	1273.14	1235.43	1182.14	1117.94	1049.76	890.105	730.516	611.419	606.431	592.919	593.328	640.698	567.129	539.549	516.074	502.748	508.499	514.127	534.968	895.138	1235.11	1459.11	1496.8	1496.8	1496.8	1496.03	1473.09	1416.18	1348.46	1285.3
1797	8	3	0.5	1423.18	1449.3	1449.3	1449.3	1449.3	1449.3	1448.82	1411.34	1320.02	1219.02	1128.41	1131.68	1171.26	1429.35	1449.3	1449.3	1422.13	1425.84	1150.45	456.999	261.961	163.194	138.579	219.768	463.025	368.159	365.51	203.168	254.721	370.666	416.436	456.039	459.135	429.715	462.807	462.354	350.921	417.539	426.055	408.968	413.907	345.313	260.481	272.165	269.274	259.938
305	0.9	8	0.6	69.0709	86.5113	88.2126	77.0171	51.6227	35.2931	59.3909	90.3845	97.863	87.5387	83.2145	79.0682	58.0517	101.741	62.786	72.1928	62.355	49.8851	62.8919	98.9346	103.254	92.9143	86.6083	73.6855	90.11	257.662	741.642	771.691	755.249	745.974	755.491	811.063	827.634	812.918	778.753	788.557	801.239	768.842	783.37	791.058	810.597	783.268	761.34	784.757	809.011	820.239
968	5	2	0.3	982.646	984.372	986.306	1055.86	978.628	981.274	983.447	984.306	984.21	984.245	984.404	984.042	984.291	983.879	984.364	983.992	989.314	982.932	984.174	984.447	984.418	984.128	983.937	984.205	984.07	984.006	983.894	983.541	982.777	982.266	983.359	983.918	984.976	984.564	984.586	984.711	985.122	984.316	987.049	984.388	983.619	982.074	982.798	984.336	984.063	984.22
1019	9	3	9	867.653	825.912	779.627	703.271	626.884	579.588	485.946	367.666	278.457	209.67	156.103	138.3	135.831	137.239	133.682	128.277	130.865	119.037	99.3036	97.8436	95.1915	93.1344	92.1916	90.8211	98.2241	124.632	81.8732	54.7412	49.1207	48.245	47.6862	47.1324	48.2731	48.2446	48.1266	97.219	21.2447	8.71791	8.75398	41.3192	52.6696	12.6	9.81072	8.89694	8.62637	9.6796
1302	5	1.5	0.8	550.316	549.259	547.423	545.26	542.672	538.132	528.99	522.935	526.835	538.466	542.684	554.835	554.806	555.235	558.846	555.155	554.268	628.804	544.015	531.015	532.736	535.914	541.409	543.075	542.127	542.374	541.957	538.725	537.561	533.819	526.3	521.103	516.507	514.066	512.791	513.877	517.233	528.601	544.586	548.594	541.129	539.796	536.396	532.971	529.17	527.435
1824	9	0.7	0.1	1363	1363	1363	1363	1363	1363	1363	1359.75	1285.43	1299.55	1192.84	1361.2	1355.52	1363	1363	1363	1363	1362.9	1219.6	391.121	88.0452	93.2557	97.0153	74.6657	40.0661	0	0	19.2889	32.698	49.8013	61.7101	61.9227	77.3599	70.1526	74.9728	51.6062	5.34805	8.70593	0	0.267775	10.6206	28.8343	45.7979	58.8024	57.3949	70.1956
1316	6	0.1	0.5	0	0	0	0	0	0	0	0	0	0	0	0	8.23723	20.8561	40.9269	69.3936	129.715	181.302	202.25	186.565	183.596	181.011	186.022	180.009	173.949	168.649	165.176	157.374	151.2	144.051	136.996	131.061	127.058	124.375	122.492	119.43	115.969	113.717	111.828	109.514	107.058	105.843	104.562	101.825	99.1346	97.5045
1835	9	0.7	0.1	1318.6	1318.6	1318.6	1318.6	1318.6	1318.6	1318.6	1318.6	1301.63	1280.06	1189.45	1310.73	1315.43	1318.6	1318.6	1318.6	1318.6	1318.44	1183.06	452.423	112.546	113.928	114.815	206.556	118.444	60.3683	76.7575	60.7562	76.9546	90.7398	94.7919	98.7719	99.5808	102.825	112.999	162.857	41.3659	64.7214	30.5366	125.702	72.3138	51.4457	90.5341	97.3678	102.071	103.932
1847	0.3	0.1	0.1	1293.9	1293.9	1293.9	1293.9	1293.9	1293.9	1293.9	1293.9	1293.66	1274.87	1230.86	1293.9	1293.9	1293.9	1293.9	1293.9	1293.9	1293.9	1204.91	897.123	249.215	137.976	120.018	263.965	199.657	145.598	139.206	110.525	403.313	227.071	341.478	383.332	380.498	335.026	329.94	184.003	227.231	179.845	202.915	165.049	226.137	110.677	194.422	287.696	294.315	268.388
1231	4	8	0.8	782.47	832.671	825.697	812.42	796.868	770.384	733.87	696.435	661.211	629.944	600.541	574.062	547.131	522.852	500.252	477.582	462.57	602.496	575.102	547.318	524.953	509.363	522.219	517.54	504.457	503.955	497.887	484.58	473.689	461.09	443.873	421.445	399.361	380.13	365.892	508.732	472.246	491.986	531.95	518.449	504.681	497.062	480.728	460.044	439.646	419.185
1140	6	8	1	931.101	926.877	921.403	915.326	910.39	905.917	899.767	892.716	885.467	880.151	874.098	870.205	863.433	857.266	852.062	845.062	838.838	833.046	825.869	819.025	812.52	806.523	800.687	794.974	789.198	783.81	778.037	771.554	767.74	765.006	760.942	752.288	745.935	739.978	734.379	729.901	726.544	731.899	720.114	713.934	707.425	702.016	695.979	689.662	683.594	724.258
1296	0.9	10	3	825.91	838.604	832.633	826.837	821.956	815.531	801.833	787.651	774.849	763.888	752.992	742.871	732.193	725.56	717.844	707.559	698.281	720.479	715.436	702.6	693.058	684.719	704.549	697.976	690.74	685.058	679.386	672.969	684.452	678.94	668.177	656.32	645.551	636.807	629.223	645.331	642.131	666.855	685.238	698.211	706.457	716.787	704.643	694.686	685.321	676.076
1659	0.9	10	1	673.482	675.089	713.25	725.237	718.308	709.522	695.219	681.748	668.629	654.584	641.053	629.419	618.653	632.8	630.566	631.386	653.289	657.263	647.973	641.625	668.75	655.706	648.108	641.315	645.257	706.077	832.68	851.785	850.441	846.034	835.911	821.112	805.555	790.338	780.806	824.933	833.524	842.683	854.118	887.202	909.174	915.228	904.6	888.046	871.882	864.682
1277	3	1.5	0.7	499.696	500.103	499.961	499.932	505.623	499.577	496.285	492.774	490.758	491.163	491.162	498.446	500.275	500.333	501.796	500.699	499.94	513.565	502.378	499.758	499.983	499.998	500.04	500.031	500	500.068	499.993	500.079	501.081	499.923	499.467	498.177	497.15	496.499	496.417	497.735	500.142	501.352	501.373	499.94	499.972	499.969	499.72	498.964	497.903	497.65
1021	2	1.5	8	811.107	894.913	921.902	1038.6	1023.33	987.764	932.055	866.693	838.15	820.792	801.838	783.53	761.922	739.927	718.487	693.075	669.541	651.915	626.832	600.975	579.425	562.934	635.848	656.472	662.079	777.517	842.473	852.022	888.781	944.166	922.844	870.233	848.462	838.949	826.158	812.583	795.029	798.499	900.079	1211.11	1214.79	1215.53	1185.64	1120.78	1050.89	983.525
1280	1	0.1	3	1196.37	1171.65	1143.55	1112.36	1082.04	1050.64	993.37	934.84	1079.53	1211.3	1211.3	1211.3	1211.3	1211.3	1211.3	1211.3	1211.3	1210.74	1197.11	1172.74	1159.61	1178.98	1211.3	1211.3	1211.3	1211.28	1209.88	1204.71	1200.33	1196.34	1194.88	1169.85	1146.63	1128.19	1113.38	1100.96	1089.13	1091.34	1095.26	1095.11	1078.61	1059.54	1028.78	992.22	956.915	929.834
1120	6	8	1	558.786	547.837	535.252	521.324	508.051	493.401	475.242	462.079	461.092	461.315	461.347	461.321	461.341	461.266	461.231	461.018	460.733	460.435	457.851	456.434	456.228	457.042	458.391	459.065	459.582	461.169	461.372	461.292	468.869	467.74	460.731	461.027	461.067	461.17	461.235	461.153	461.221	461.244	461.223	461.133	461.252	461.228	461.283	461.14	460.76	481.483
182	0.4	0.7	0.2	988.438	1096.65	1100.81	1101.18	1093.57	1038.68	962.612	899.224	850.678	806.274	773.275	770.784	771.585	821.172	907.242	1019.64	1004.78	938.05	851.316	784.637	770.747	770.889	828.061	1038.15	1100.96	1102.07	1102.2	1102.66	1102.48	1096.07	1076.34	1016.88	974.49	940.651	983.279	1101.03	1095.92	1101.77	1102.3	1102.33	1102.59	1100.15	1060.4	1004.26	967.173	932.532
7311	3	1	1.5	89.3046	97.1356	98.6661	84.5802	77.9786	81.0128	82.8795	84.3259	85.0069	85.3432	85.5897	85.684	85.2743	84.6902	84.3954	84.1891	84.4265	89.647	96.1513	98.4626	99.5939	100.462	102.709	99.0053	99.6129	99.602	94.8898	98.2338	100.286	94.3639	91.4362	93.6227	96.9743	99.7688	101.969	103.594	103.234	99.1274	88.5104	79.0625	72.3357	78.2804	81.6914	84.0905	86.5846	88.7188
1755	0.8	1.5	0.3	411.963	423.423	430.701	406.93	400.922	400.874	401.06	401.339	401.308	401.28	401.498	401.583	401.638	449.122	404.833	402.443	401.022	452.279	400.618	401.038	401.196	401.484	401.632	414.751	445.184	433.792	401.921	401.458	400.976	400.808	401.077	401.351	423.749	401.167	401.391	423.406	411.339	414.588	400.61	431.21	497.333	460.192	400.728	400.976	401.049	401.256
1152	0.1	2	1	0	0	0	0	0	0	0	0	0	0	0	0	0	0	0	0	0	0	0	0	0	0	0	0	0	0	0	0	0	0	0	0	0	0	0	0	0	0	0	0	0	0	0	0	0	0
1192	7	6	1.5	342.478	323.405	335.878	336.814	330.953	335.18	343.037	347.47	349.072	346.479	346.166	348.76	350.089	345.431	349.425	345.74	347.319	340.533	337.525	349.371	350.321	349.467	350.483	351.412	343.842	347.293	338.251	347.112	349.206	347.892	357.382	347.7	361.825	350.229	355.778	340.508	316.068	322.523	327.455	331.251	347.137	342.014	345.124	352.501	348.144	350.828
541	9	9	0.3	396.016	344.969	279.553	223.33	733.888	920.782	833.276	697.7	606.514	546.248	493.213	442.85	393.462	336.463	271.491	264.929	471.44	431.267	347.828	264.799	198.692	152.086	117.793	93.6044	91.4982	91.6	91.6699	99.531	557.985	763.843	651.246	574.615	521.454	469.077	420.539	373.346	305.522	245.203	196.002	156.185	378.838	901.969	842.986	708.958	608.936	544.212
1822	10	0.8	0.3	909.4	909.4	909.4	909.4	909.4	909.4	909.4	909.4	909.4	909.4	906.723	909.4	909.4	909.4	909.4	909.4	909.4	909.394	842.057	600.168	137.163	80.8205	80.0411	167.648	125.044	99.3062	109.03	49.6594	153.243	191.764	185.306	188.606	174.756	139.092	172.308	124.217	172.628	99.9193	124.944	110.685	159.624	77.4413	75.555	97.708	100.181	93.8718
972	8	1.5	0.4	892.877	907.8	907.8	907.8	907.8	907.8	907.8	907.8	907.743	904.012	893.839	880.153	863.456	845.809	827.284	808.599	814.297	859.085	867.675	864.55	851.952	833.421	814.202	796.21	778.378	770.443	787.083	814.411	825.172	837.257	848.16	848.525	838.721	823.004	804.309	785.25	765.723	754.014	762.447	896.582	907.8	907.8	907.8	907.233	899.297	882.019
613	1.5	1.5	1.5	289.982	324.602	396.114	589.545	888.265	890.219	686.76	462.195	353.18	306.267	311.921	306.356	288.345	267.327	275.005	393.035	480.482	413.429	267.978	169.141	111.587	88.5874	88.3271	88.3232	88.6526	92.9206	175.848	250.362	504.796	569.837	384.466	254.777	185.313	149.35	136.58	137.06	124.932	131.369	277.398	384.174	598.423	813.615	576.249	403.537	293.726	235.153
1086	10	5	6	385.924	381.955	377.731	373.122	367.459	358.937	338.672	311.51	288.785	269.412	251.815	233.589	215.184	198.785	182.75	165.803	150.126	137.28	124.275	111.893	101.08	92.2906	87.4874	86.248	84.9873	83.9018	82.7643	81.296	79.6686	78.1603	76.7724	75.6225	74.5513	73.6546	72.736	72.113	71.4646	76.0978	76.0986	76.5028	70.1712	68.5755	67.3258	66.2894	65.0676	64.2896
1295	9	0.5	0.1	631.888	678.43	689.378	698.264	698.962	694.205	675.737	654.877	635.283	620.891	600.323	568.93	537.718	519.092	487.574	455.192	434.028	438.7	406.463	370.765	349.979	339.643	368.453	341.041	339.616	342.176	344.317	353.631	364.424	336.932	326.258	316.505	304.867	300.265	319.772	373.142	352.064	380.323	365.117	342.885	352.164	344.94	330.043	326.075	322.572	315.378
1139	10	10	1	844.632	844.856	844.78	843.713	842.684	840.35	833.813	827.767	825.627	844.9	844.9	844.9	844.9	844.9	844.9	844.9	844.9	844.886	844.325	843.443	843.538	844.551	844.9	844.9	844.9	844.9	844.9	844.9	844.9	844.9	844.9	844.9	844.9	844.9	844.9	844.9	844.9	844.9	844.9	844.9	844.9	844.854	843.852	841.153	838.33	842.097
1862	2	4	0.5	766.478	826.34	826.5	826.5	825.851	816.191	788.765	724.598	651.743	599.367	591.076	601.137	526.082	660.526	823.353	815.266	758.092	763.021	699.469	619.518	418.922	211.9	109.668	83.1404	299.686	255.142	66.9531	95.1999	86.5847	78.2239	79.6978	79.8324	80.1591	80.6536	83.9923	292.833	98.3672	198.163	97.076	106.224	79.2793	75.9357	78.664	79.2612	80.044	80.2355
629	6	1.5	0.3	43.1253	319.948	654.178	406.576	429.038	350.847	43.3176	34.0459	35.2264	36.0167	36.535	34.4756	36.1853	35.1636	37.2547	33.5509	35.2085	35.2011	35.4684	36.0615	39.4976	36.8169	37.9605	37.9874	36.2469	37.7619	37.586	33.4034	33.7102	35.0106	37.2835	42.955	44.6096	43.5348	43.8853	42.2816	39.7236	38.8278	45.407	40.7039	44.2056	45.1581	44.8795	73.2304	47.034	45.9513
1000	6	2	0.7	316.678	341.076	360.368	374.716	365.613	355.277	342.072	327.523	314.927	305.666	304.688	318.863	311.388	325.237	331.92	321.081	351.83	410.781	420.903	409.308	397.726	387.765	407.265	417.614	428.293	495.016	505.287	499.186	486.452	499.555	485.27	470.582	462.232	445.443	433.24	539.838	528.198	525.709	513.802	563.408	551.613	538.458	522.518	503.156	484.628	501.189
7306	0.2	0.1	0.1	93.7972	89.3116	361.458	726.703	121.891	125.494	149.749	155.832	153.439	145.34	158.844	162.371	142.026	107.653	124.486	112.409	147.643	138.703	174.643	179.854	196.299	192.122	252.581	170.197	510.416	789.7	749.257	109.538	137.91	151.267	137.747	156.658	160.668	145.855	164.441	76.4525	99.1526	495.543	103.684	649.845	161.433	130.838	141.484	149.404	165.341	164.773
991	0.8	1.5	1.5	613.866	665.358	761.649	772.2	772.2	770.564	755.165	729.705	700.424	669.502	639.221	613.058	584.819	556.895	438.625	284.139	271.028	278.703	268.349	263.408	248.915	237.842	279.092	256.92	243.582	270.877	273.2	271.578	272.481	276.138	247.475	233.988	222.549	209.036	195.384	182.403	169.489	171.278	177.812	241.841	178.99	187.944	186.562	171.757	159.869	150.885
7317	0.9	8	0.5	138.597	110.962	128.075	73.8186	78.7782	73.5437	74.0105	74.1731	74.2673	74.3326	74.3852	74.5079	74.4528	99.4724	73.3829	74.4386	73.9698	74.09	74.2685	74.3711	74.4135	74.6006	74.5963	76.9525	148.165	94.5759	73.2158	73.0791	73.6498	73.9728	74.0725	74.3059	74.2256	74.4027	75.7907	145.567	76.6158	96.1931	73.7014	130.033	121.267	78.034	73.7241	73.9725	74.1607	74.2713
998	8	0.4	1.5	750.3	750.3	750.3	750.3	750.3	750.3	750.252	750.3	750.3	750.3	750.3	750.3	750.3	750.3	750.3	750.3	750.3	709.271	603.144	475.664	398.888	383.619	411.551	432.966	450.363	465.962	489.662	501.891	479.176	418.904	371.486	335.685	351.933	416.463	492.968	567.039	638.953	680.584	739.381	750.3	750.3	750.3	736.689	716.02	738.396	750.3
1716	6	1.5	0.7	137.254	152.707	212.012	234.793	204.494	188.401	173.141	155.549	140.755	129.43	122.048	125.48	117.374	162.085	143.956	131.484	178.958	239.22	195.406	181.257	167.185	152.348	143.081	138.761	213.182	253.908	153.108	125.098	111.565	117.257	108.864	98.4153	94.2717	91.4109	86.4008	245.486	126.574	131.487	125.729	185.854	239.115	192.237	157.903	140.879	129.116	172.005
1896	8	0.9	0.5	746.284	746.3	746.3	746.3	746.3	746.3	746.3	746.227	745.219	745.965	745.822	746.009	736.574	745.212	746.3	746.3	744.416	740.2	716.09	688.71	660.893	613.012	579.515	555.766	699.864	746.3	746.3	746.3	746.3	746.3	745.953	745.184	725.348	716.207	703.117	741.524	746.3	746.3	746.3	746.3	746.3	746.3	746.088	740.25	744.58	726.46
1883	0.8	2	10	268.516	436.906	474.949	441.485	418.67	414.003	392.534	363.209	333.318	313.785	293.193	258.482	214.41	310.19	371.752	353.3	330.625	308.028	271.364	224.618	181.969	147.844	123.256	107.25	234.949	290.776	319.02	314.759	351.733	334.206	313.958	295.433	249.851	206.704	171.405	163.535	255.578	264.43	245.213	371.13	391.291	376.551	357.681	332.856	312.388	282.524
1285	2	1.5	1.5	121.123	117.527	114.605	112.394	119.892	99.7533	89.8799	84.7321	80.9422	78.5144	76.3185	79.6645	70.6069	69.9566	69.7572	68.9501	69.0137	110.584	69.1946	69.0207	69.0338	69.03	69.0314	69.0245	69.0426	69.0642	69.0768	69.1552	71.9537	68.9017	69.0481	69.0753	69.0912	69.1225	69.2003	69.1736	69.4205	82.4758	71.5324	68.6791	70.1376	68.968	69.0352	69.0668	69.0803	69.0952
1266	0.8	1.5	0.6	65.0315	63.8947	62.6747	66.6752	66.6053	65.9409	65.1718	65.2445	65.1565	65.9718	66.4431	67.3544	67.0477	67.6825	67.8008	67.754	67.5238	67.9594	67.7026	67.2059	67.5796	67.6952	67.359	67.7224	67.7379	67.7111	67.283	67.0369	67.4293	67.759	65.9797	65.8274	65.1902	65.4301	67.2292	65.096	63.2706	61.4797	32.2484	31.4789	41.2599	49.5464	47.0448	50.3579	53.4591	54.8189
1176	3	0.6	0.1	429.199	412.928	397.307	380.829	369.095	365.391	365.915	369.56	382.515	463.764	444.869	469.533	451.522	449.88	468.662	468.75	469.54	470.345	474.499	475.422	468.397	468.173	466.368	456.948	447.211	447.086	443.82	433.752	451.138	470.844	473.14	474.737	475.712	474.983	467.282	458.908	453.944	473.793	466.149	465.854	460.048	465.277	472.331	478.534	474.536	473.827
924	2	1	0.6	512.995	503.786	513.396	528.932	515.829	518.064	504.983	489.398	490.084	447.263	274.41	94.3472	48.0183	49.1357	35.9201	35.471	37.2767	41.6456	57.6922	5.60959	2.87727	5.26184	11.4503	17.227	17.4211	29.9084	26.9745	11.028	18.5002	39.3971	45.4287	39.6023	42.2179	44.4168	57.3927	43.6384	29.1942	40.616	36.1259	30.8867	1.89499	3.01694	4.24173	4.05378	7.88212	12.1026
758	1	1	1.5	518.896	540.774	557.685	563.33	546.048	521.89	496.798	481.189	484.409	481.884	484.639	487.59	487.162	486.343	480.873	478.519	468.94	454.9	436.313	408.701	393.558	404.494	400.308	395.751	396.211	393.245	389.286	389.876	376.21	366.91	363.898	355.218	344.441	367.358	387.249	397.63	410.832	417.672	421.673	417.866	399.819	389.232	386.855	365.577	354.539	362.957
1257	0.1	10	0.2	0	0	0	0	0	0	0	0	0	0	0	0	0	0	0	0	0	0	0	0	0	0	0	0	0	0	0	0	0	0	0	0	0	0	0	0	0	0	0	0	0	0	0	0	0	0
895	0.6	0.6	0.1	195.376	217.925	198.045	206.626	189.39	205.976	204.669	225.184	216.35	225.249	202.266	202.36	245.999	219.799	217.293	238.89	208.732	229.945	222.682	218.786	227.075	227.803	228.934	230.696	231.977	225.768	210.666	211.398	209.093	237.307	202.799	216.593	224.415	209.29	208.166	211.867	218.692	238.442	192.209	205.142	203.224	218.647	207.162	211.653	217.421	190.419
1317	0.9	9	0.1	342.939	322.328	298.692	276.143	202.991	37.4019	18.6992	24.9958	1.92091	6.34713	5.11366	14.1185	14.5963	15.6057	17.1755	17.5601	30.5245	52.7403	42.0454	32.6825	39.6869	46.9858	52.3227	42.4397	41.0037	41.876	46.4192	44.9043	48.0046	47.1354	43.3126	41.0182	39.1423	39.5347	43.0081	43.2775	41.2176	41.4116	42.4848	41.7514	38.7513	39.0493	47.7941	50.2168	49.6544	54.9026
1242	3	2	0.8	640.077	639.954	638.707	633.49	622.575	601.576	563.087	517.725	512.958	640.1	640.1	640.1	640.1	640.1	640.1	640.1	639.303	624.893	596.767	580.48	600.868	619.709	625.325	631.117	636.316	640.1	639.547	635.072	624.814	595.655	542.103	491.152	457.741	443.326	435.986	435.067	527.254	636.907	640.1	640.094	632.846	610.886	561.461	501.965	464.956	452.528
107	0.6	1	0.8	356.462	371.791	409.925	413.61	392.122	363.247	329.222	293.543	262.689	243.86	237.92	251.824	258.343	289.969	298.056	286.513	262.264	245.216	236.814	225.402	215.587	209.449	218.493	389.135	494.575	567.354	613.499	609.36	560.061	497.967	435.578	391.628	355.386	323.95	296.424	368.071	426.506	535.663	613.912	597.606	555.697	495.822	434.834	392.106	356.41	324.348
1841	3	0.3	0.1	335.435	408.625	534.827	577.389	552.79	509.639	447.502	396.796	367.273	339.719	312.8	291.238	268.382	328.647	349.226	376.879	346.141	330.535	303.372	277.706	253.869	231.722	216.442	211.671	331.085	519.658	571.539	535.467	487.866	425.101	385.157	356.486	326.917	299.029	277.945	392.085	406.747	432.533	411.38	428.889	415.04	401.233	379.293	354.087	328.303	302.167
907	2	1.5	3	527.558	568.9	568.9	568.9	568.9	568.895	560.554	531.39	514.709	509.002	495.314	475.936	451.471	428.878	438.003	442.096	445.344	427.611	407.651	252.727	163.641	127.348	103.138	81.0867	60.9212	70.9032	156.42	126.271	149.654	175.253	157.18	132.24	103.415	82.539	103.42	162.095	141.66	161.282	173.544	101.447	52.3529	50.4154	61.9905	53.2732	53.653	76.5194
80	0.6	1.5	0.2	335.486	241.046	327.769	334.371	277.076	231.395	160.458	109.835	81.0033	60.5682	93.6673	211.441	246.72	270.333	292.649	323.78	259.668	264.27	180.701	122.846	90.4019	97.1031	109.988	331.772	269.776	365.07	329.94	348.403	281.344	215.972	162.68	109.247	86.6465	87.8599	124.161	285.25	331.973	350.572	329.171	316.857	259.385	217.322	189.674	118.497	90.4269	60.8659
1236	0.2	0.9	1	154.112	155.296	156.474	157.113	157.316	152.52	139.079	124.796	118.366	118.079	118.276	120.303	125.026	129.29	134.902	142.816	148.782	151.987	148.338	140.775	138.097	156.778	177.44	187.47	196.626	205.456	214.394	220.903	226.382	232.774	238.33	234.571	232.827	234.362	236.661	238.453	239.765	241.459	244.333	248.657	251.819	251.35	245.191	236.595	231.153	229.542
981	9	7	1	534.1	534.1	534.1	534.1	534.1	534.1	534.1	534.1	534.1	534.1	534.1	534.1	534.1	534.1	534.1	534.1	534.089	534.1	529.394	516.142	501.344	486.204	472.364	460.362	448.977	446.96	454.342	455.32	448.621	446.613	451.242	462.791	471.828	479.65	486.612	493.16	499.313	512.104	530.666	534.1	534.1	534.1	534.1	534.1	534.1	534.1
1093	1.5	1.5	1	51.9305	52.0199	51.8464	51.6663	51.9745	51.8765	51.9847	52.2488	52.515	52.52	52.25	52.5337	51.9306	53.0994	52.7947	51.6666	56.2143	57.338	51.2758	51.7028	51.9758	52.0036	52.1475	52.0795	58.6232	123.974	51.3327	51.4512	60.0743	63.046	51.3646	51.6719	51.9136	52.057	52.3374	84.534	56.1683	52.9001	52.7099	51.7579	93.1273	50.082	51.6594	51.8729	52.1325	52.2135
1709	4	7	0.9	374.343	414.863	494.616	509.311	508.736	504.76	491.979	473.678	449.337	419.382	389.992	367.163	318.627	276.1	183.793	25.2678	21.7632	10.7947	0.285578	0.286944	0.893204	1.57731	3.92797	13.2238	30.972	9.86188	6.88363	0.108766	1.81963	17.5002	9.63035	2.1732	0.079181	0.188754	2.84193	15.7864	13.6828	26.7056	12.8577	23.7565	32.9575	11.5555	1.34836	0.173902	0.00131028	0.402174
1017	1	1.5	1.5	57.0389	71.8325	93.3037	85.7645	65.6846	57.6694	51.5111	50.7255	50.7634	50.7862	50.8021	50.8029	50.8455	55.2753	53.2534	51.0552	59.2797	78.7167	56.8466	52.1927	50.7178	50.7804	50.9114	51.8583	70.8761	155.634	122.866	90.1888	75.0723	66.1384	58.9907	55.1078	66.3128	56.2602	57.0557	208.686	79.9439	57.4602	62.9558	104.104	150.93	106.239	93.7485	84.2019	75.6263	68.6324
1194	0.9	0.9	1.5	117.975	111.884	103.684	93.8498	85.0952	75.5224	64.1049	53.6319	50.4064	50.4468	50.2831	50.2411	50.1814	50.321	50.2696	50.2416	50.2588	50.2981	50.303	50.3205	50.356	89.5782	62.3751	49.8534	50.0261	50.8784	49.8948	49.9378	68.858	53.431	49.6277	49.9232	50.1316	50.1525	50.2257	50.2925	50.3334	50.2802	50.2966	50.2826	50.2713	50.2821	50.295	50.3528	50.3753	50.4149
[truncated: 434 more columns]

## Sheet: Outflow(WG inflow-With Demand)
grand_id	q1	q2	q3	1980-01	1980-02	1980-03	1980-04	1980-05	1980-06	1980-07	1980-08	1980-09	1980-10	1980-11	1980-12	1981-01	1981-02	1981-03	1981-04	1981-05	1981-06	1981-07	1981-08	1981-09	1981-10	1981-11	1981-12	1982-01	1982-02	1982-03	1982-04	1982-05	1982-06	1982-07	1982-08	1982-09	1982-10	1982-11	1982-12	1983-01	1983-02	1983-03	1983-04	1983-05	1983-06	1983-07	1983-08	1983-09	1983-10
610	0.7	0.9	4	1432.11	4583.12	3663.81	2124	3935.16	4905.39	2052.37	1500.26	1484.12	1556.25	1510.86	1555.91	1541.14	1378.83	1864.78	1614.59	1428.37	1316.6	1182.77	1002.62	955.595	987.012	954.864	986.427	986.391	1046.6	1652.49	1230.07	1105.87	1079.83	1064.62	994.975	949.662	980.387	948.338	985.394	991.456	970.539	2420.5	2006.42	1154.58	1082.35	1068.32	1035.85	1362.18	1464.94
1294	0.4	9	0.9	67.1856	51.313	55.7465	54.204	61.3445	62.5321	54.8199	180.702	361.249	439.239	351.316	185.875	90.3692	97.6808	282.133	184.943	178.715	595.983	174.517	177.676	160.275	213.474	192.819	162.735	149.574	145.495	149.685	81.0369	110.031	80.0143	68.8353	76.7055	59.1101	57.4127	65.1197	73.039	104.059	194.71	211.828	89.8791	114.468	87.4444	73.1809	63.6307	55.7962	52.4526
1247	2	10	1	90.1029	84.5224	93.1822	86.5295	91.144	93.2224	150.046	141.532	130.906	355.007	183.451	298.562	222.907	159.405	215.158	193.572	183.6	153.776	335.451	668.543	87.0543	1071.19	316.072	135.309	114.823	129.151	140.762	109.023	486.136	328.517	252.06	125.406	98.4574	87.3531	75.1898	75.7079	84.6767	130.797	140.056	148.619	87.9376	111.373	77.8761	60.1807	52.402	50.6841
1186	6	10	1	202.238	262.844	116.252	164.277	111.32	61.2161	56.3297	51.8267	47.1226	47.422	45.4466	46.7716	46.1119	40.9473	45.7384	44.6568	47.2728	79.6838	60.197	51.2288	46.8605	46.575	47.06	49.4563	47.9858	55.8889	61.0759	50.7794	50.4053	46.9136	45.1656	41.2813	37.3191	36.98	35.5575	115.397	81.3703	78.0341	94.8952	69.0639	57.0598	54.7245	53.0984	49.2216	44.891	44.5482
355	6	0.3	0.8	182.752	143.195	176.676	279.332	516.707	386.31	181.959	84.8462	54.1628	47.1776	133.193	210.048	186.759	146.269	205.305	344.118	478.096	428.934	228.608	143.555	90.9084	64.0522	61.6111	147.744	165.086	140.41	192.119	275.012	409.577	390.603	209.5	90.3312	52.4192	44.8237	148.72	235.748	263.212	232.465	326.401	375.872	758.425	593.764	525.016	208.394	163.855	185.977
1302	6	1.5	0.9	16.9704	15.3305	16.3773	15.3644	15.0974	15.6801	14.4166	14.1612	18.0775	25.6263	21.3528	34.4543	37.308	31.5167	73.5768	44.2256	37.7581	205.543	103.528	23.4585	19.7956	20.0662	20.912	19.7635	17.9557	16.4375	18.3184	15.9049	16.6044	17.2536	15.3514	15.9199	14.516	14.8352	14.4337	16.285	18.9853	22.7685	35.6881	31.0467	17.4079	17.1534	17.1954	17.2865	15.4772	15.9919
1231	8	9	0.8	68.9068	78.5224	68.5723	60.2889	61.518	58.5279	54.1996	46.3612	41.4139	40.7402	38.1009	38.5925	37.4241	32.8228	35.8127	34.9952	38.6253	127.051	87.4518	53.8574	45.2136	45.8194	62.4087	65.08	56.1073	54.2729	61.1639	53.3024	53.6306	52.0271	49.417	42.3139	36.2689	29.7137	26.0897	135.512	79.4734	67.6659	96.9987	67.9621	60.8203	58.1883	55.0388	49.0343	43.6469	41.9105
1140	8	8	1	5.40513	4.87391	5.25615	4.75292	4.91755	3.78294	3.33098	4.05899	5.73128	6.95004	6.3875	7.6768	6.83796	5.92418	6.94534	6.29434	6.12713	5.36705	4.38497	5.21511	5.49786	6.00729	5.82299	5.94484	5.9018	5.29338	5.81357	5.58335	6.66025	9.09199	9.5963	4.498	4.93071	5.48494	5.31881	5.48853	6.80269	19.4997	10.2263	6.3903	5.37888	4.57486	3.99983	3.85465	4.36567	44.828
1296	0.9	5	4	16.5197	19.1369	17.0713	15.7391	16.2589	15.8896	14.9141	14.3084	13.5361	14.4375	16.135	16.4386	16.3099	15.7605	17.8501	16.4233	16.4703	27.5337	24.2302	17.6289	16.208	16.4535	27.8409	21.4562	18.3277	16.5243	18.2677	17.3153	25.5032	22.1129	17.5117	16.2696	15.1416	15.1925	14.4575	27.6577	22.068	30.1149	35.7152	31.6994	27.3523	29.2613	18.9262	17.5925	16.1556	16.1202
1277	1.5	2	0.7	2.11433	4.11368	2.02468	2.26735	13.8105	7.92467	1.43354	1.30423	1.08959	1.10106	1.01147	3.01879	6.8365	8.23732	17.2617	14.334	6.57295	29.4344	19.7822	1.71715	2.98038	2.95727	2.45074	1.39143	1.78735	3.23309	3.25888	3.94598	10.1624	2.44805	1.42251	1.24253	1.07883	1.056	0.986383	1.11307	4.10063	13.8092	17.9421	8.27076	6.60768	2.64325	1.46236	1.31027	1.1311	1.08688
1280	1	0.1	3	16.1682	14.412	15.7569	15.2519	15.9381	16.8132	16.8845	15.2418	210.303	224.729	78.635	148.843	124.271	82.2071	150.791	74.7458	49.5991	31.2915	18.7554	17.5741	15.5125	93.1519	36.7209	30.7133	29.2417	32.9518	23.7528	16.5919	26.8038	19.5716	21.3842	17.061	15.4178	15.8479	15.2784	15.7503	15.733	14.3914	16.0276	15.9255	16.7586	16.388	17.2036	15.9478	14.3154	14.6141
182	0.7	1	0.4	234.85	579.722	227.189	123.718	118.493	112.239	105.694	90.7451	73.0404	68.9764	62.1728	60.7043	57.3727	79.5114	116.171	119.211	90.509	77.055	66.9721	23.7969	12.1565	20.2309	61.9047	160.867	220.216	472.14	408.012	488.086	160.308	119.786	122.197	109.561	96.0096	91.8306	97.7469	443.954	390.142	509.725	695.356	290.288	151.318	120.158	120.857	109.523	97.2053	91.8519
1152	0.1	2	1	0	0	0	0	0	0	0	0	0	0	0	0	0	0	0	0	0	0	0	0	0	0	0	0	0	0	0	0	0	0	0	0	0	0	0	0	0	0	0	0	0	0	0	0	0	0
1295	8	0.6	0.1	37.1497	49.094	40.7528	36.2989	34.0811	34.0627	30.1718	26.4982	21.4081	20.3462	19.2956	22.7287	23.987	29.2345	110.045	170.691	49.6406	102.439	38.8414	18.2656	13.6769	12.5829	133.823	36.6371	25.0892	26.5032	32.0894	69.905	107.827	45.2123	22.896	16.4411	11.239	10.6341	108.642	163.935	89.6293	121.727	101.303	65.7803	99.4085	63.8898	20.2582	17.4773	16.0004	14.1289
629	6	1.5	0.1	2049.05	4375.25	3809.97	2090.1	3241.41	4699.98	2172.29	1724.29	1676.04	1740.17	1689.29	1746.55	1744.45	1570.73	1751.15	1609.46	1637.15	1566.69	1667.71	1595.17	1545.39	1604.1	1558.3	1617	1643.35	1485.18	1606.64	1490.12	1583.3	1379.47	1538.03	1430.55	1279.36	1331.94	1296.73	1515.25	1355.71	1294.05	1533.53	1383.72	1578.09	1225.53	1267.45	1117.35	1313.75	1458.04
1266	0.9	1.5	0.6	10.5216	13.9219	14.453	13.0833	14.8515	14.7916	12.7762	11.8761	10.5169	10.1581	9.30692	9.20327	8.85645	7.77291	8.68179	8.69328	9.06688	9.03455	10.485	10.4776	9.47484	9.31559	9.00589	9.4733	9.49678	8.69325	9.96268	9.87599	11.7005	11.987	11.3168	10.3045	8.94826	8.45643	7.72789	16.926	15.5704	24.8991	33.2179	19.8597	18.1724	19.9629	13.085	12.3048	11.2867	10.983
1176	0.6	0.1	0.1	12.2681	10.7872	11.5379	34.558	95.69	112.603	37.3521	30.3451	115.51	274.306	129.544	181.508	22.8963	14.6074	30.828	19.1636	18.7348	18.1869	31.5162	22.8638	14.3359	65.7932	27.6472	11.0336	9.40774	14.4412	15.0758	10.3263	146.164	170.297	94.4353	42.4585	30.1549	19.5853	11.4104	9.08693	19.6485	100.848	29.3983	17.4622	14.2346	32.3877	41.4182	26.7675	24.696	136.853
758	1.5	9	1.5	74.4214	67.5878	74.5841	72.0503	74.6986	71.1955	72.6022	70.7366	67.6629	69.9729	67.7582	70.311	70.3784	63.0412	63.3024	60.8889	62.7134	56.0763	54.1812	52.0676	49.5902	52.6756	53.0129	55.5033	56.4539	51.3958	56.4434	55.0215	55.6845	58.0654	63.3799	62.9905	58.7573	61.811	62.4469	65.7313	65.9605	59.5908	65.1594	62.1449	62.0848	58.4382	60.8366	59.1142	55.2961	57.633
1242	6	1.5	0.8	3.35269	2.72168	2.50009	2.40322	2.87004	3.90912	4.40274	3.48126	225.06	199.534	46.2621	49.8173	48.2243	37.6049	33.845	27.9754	7.66545	3.90752	4.26486	3.54809	3.21829	2.65571	2.39694	2.48351	2.49281	4.39727	2.59401	2.41019	2.89892	3.69629	3.86205	3.43311	2.57548	1.74448	1.66362	1.87137	3.37149	76.7678	19.8489	31.2009	3.03605	3.84849	4.32557	3.5495	2.5614	1.86724
1236	3	0.8	1	5.06573	4.54221	5.01367	4.95244	5.07819	5.93836	6.45507	5.55824	4.35155	4.29235	4.10897	4.41839	4.80013	4.32575	4.92821	5.10846	5.56387	5.4961	6.13724	5.42037	4.32976	6.55326	6.5811	5.50784	5.37696	4.85259	5.47031	5.33357	5.42127	5.9146	7.08892	6.46759	5.38317	5.15101	4.86808	4.94774	4.90125	4.4569	5.06142	5.19412	5.60092	5.71271	6.19279	5.67117	4.73334	4.53667
1194	1	1.5	0.7	14.7226	14.1125	16.2871	15.2219	15.2129	15.208	15.5947	14.1733	12.2998	13.0048	13.1092	13.6476	13.9975	11.9524	13.0688	13.09	13.2128	12.7561	13.3011	12.1849	10.5821	27.2926	34.3806	19.5463	17.7508	20.0993	24.5178	19.9534	84.3793	44.2035	26.218	19.1698	17.0629	16.1035	14.828	14.8012	14.5005	12.909	14.3505	14.1105	14.3459	13.908	14.115	13.1428	11.7689	11.4848
[truncated: 434 more columns]

## Sheet: Storage(WG inflow-With Demand)
grand_id	q1	q2	q3	1980-01	1980-02	1980-03	1980-04	1980-05	1980-06	1980-07	1980-08	1980-09	1980-10	1980-11	1980-12	1981-01	1981-02	1981-03	1981-04	1981-05	1981-06	1981-07	1981-08	1981-09	1981-10	1981-11	1981-12	1982-01	1982-02	1982-03	1982-04	1982-05	1982-06	1982-07	1982-08	1982-09	1982-10	1982-11	1982-12	1983-01	1983-02	1983-03	1983-04	1983-05	1983-06	1983-07	1983-08	1983-09	1983-10
610	0.7	0.9	4	36346.6	36700	36700	36700	36700	36700	36700	36700	36700	36700	36700	36700	36700	36700	36700	36700	36700	36700	36683.2	36545	36434.6	36356.7	36298.7	36251.7	36222.4	36461.7	36700	36695.3	36553.8	36283.3	35994.5	35728.4	35550.1	35409	35305.5	35423.7	35832.2	36443.9	36700	36700	36673.7	36466.7	36247.9	36501.6	36700	36700
1294	0.4	9	0.9	1779.18	1749.81	1720.86	1694.85	1682.87	1669.88	1636.14	1562.08	1281.86	921.92	592.434	395.32	389.808	387.687	382.488	376.405	381.653	370.664	354.517	381.383	382.321	381.627	378.136	381.558	383.405	382.759	382.822	383.96	388.867	387.04	390.581	389.536	390.654	390.872	391.387	389.886	389.613	384.249	379.661	389.13	386.938	387.918	389.576	390.596	391.222	391.851
1247	2	10	1	2003.86	1974.94	1943.05	1899.82	1870.4	1846.86	1753.78	1615.72	1502.45	1683.41	1533.5	1597.48	1491.19	1406.03	1373.86	1287.37	1212.03	1128	1024.51	477.06	250.156	209.54	17.1818	22.4841	42.8107	96.9835	130.006	145.897	191.056	115.064	157.812	137.484	151.72	165.732	180.291	198.73	222.747	244.142	245.337	232.323	237.791	244.273	244.28	246.343	250.288	254.652
1186	6	10	1	1771.04	1808.75	1724.15	1736.71	1721.26	1707.32	1681.66	1644.27	1604.11	1573.37	1545.6	1520.39	1491.46	1464.65	1441.03	1416.46	1401.46	1489.73	1477.29	1452.07	1429.69	1409.17	1400.52	1387.87	1371.83	1398.57	1404.95	1393.34	1381.14	1361.5	1333.18	1297.54	1259.3	1228.24	1204.85	1398.99	1445.36	1546.32	1659.94	1692.71	1677.22	1664.48	1637.14	1597.54	1555.07	1515.96
355	6	0.3	0.8	347.044	327.378	334.88	449.168	753.442	794.239	575.342	398.004	311.198	271.583	310.034	333.119	314.646	300.196	320.322	461.836	798.075	1108.07	867.83	641.84	497.398	424.597	387.313	413.304	400.716	386.374	399.777	486.222	657.798	744.705	553.46	372.49	279.806	245.622	299.85	333.862	363.293	374.666	446.118	602.247	1270	1730.02	1357.95	1047.98	917.565	897.721
1302	6	1.5	0.9	547.885	548.01	546.408	544.341	541.697	536.201	524.906	516.82	519.919	531.54	536.24	554.257	555.891	555.403	559.239	554.799	553.975	627.901	544.922	531.308	532.287	535.458	541.059	542.891	542.037	542.295	541.848	538.496	537.09	532.381	523.193	516.455	511.059	508.509	507.331	508.528	511.968	523.38	540.006	548.273	540.427	538.407	534.067	529.621	525.226	523.41
1231	8	9	0.8	802.877	860.035	861.855	854.827	844.048	820.018	784.009	748.104	715.208	685.803	658.007	632.968	607.363	584.139	562.39	540.258	525.813	675.53	668.334	645.551	625.391	611.067	627.604	630.469	622.566	626.188	625.542	616.229	607.398	596.449	579.681	556.692	533.146	513.324	503.638	664.644	656.679	684.592	745.358	745.967	737.318	731.521	715.534	692.734	668.542	643.287
1140	8	8	1	937.879	933.322	927.521	921.201	916.128	912.091	907.235	902.412	896.667	891.097	884.58	880.239	873.022	866.417	860.782	853.345	846.771	841.04	834.869	829.156	823.003	816.812	810.56	804.417	798.208	792.411	786.233	779.335	775.114	772.172	768.767	761.206	755.381	749.313	743.337	738.462	734.713	739.807	727.806	721.27	714.415	708.978	703.594	698.353	692.985	733.78
1296	0.9	5	4	925.122	943.254	941.969	939.491	937.609	934.556	923.362	911.107	899.958	890.416	878.581	866.531	853.925	845.607	836.532	824.732	813.769	835.306	832.042	818.037	806.932	796.97	816.611	810.879	802.751	796.011	789.276	781.693	792.562	787.755	775.902	762.52	750.139	739.807	730.671	746.376	743.703	769.002	790.125	805.753	814.864	827.407	815.032	803.764	792.928	782.154
1277	1.5	2	0.7	499.999	500.109	499.978	499.921	505.679	499.543	495.788	491.708	489.505	489.889	489.899	498.079	500.247	500.397	501.88	500.837	499.944	513.591	501.932	499.39	499.967	500.061	500.01	499.987	499.972	500.064	500.018	500.128	501.061	499.771	499.198	497.84	496.798	496.158	496.089	497.419	500.139	501.412	501.206	499.951	499.972	499.995	499.76	498.934	497.842	497.592
1280	1	0.1	3	1200.8	1184.06	1163.73	1140.19	1116.93	1091.59	1038.84	984.494	1130.79	1211.3	1211.3	1211.3	1211.3	1211.3	1211.3	1211.3	1211.3	1211.23	1202.66	1184.72	1179.06	1195.78	1211.3	1211.3	1211.3	1211.3	1211.28	1210.51	1210.5	1206.85	1206.6	1188.41	1172.79	1162.27	1155.23	1150.47	1146.31	1155.88	1167.37	1174.82	1165.21	1152.36	1127.15	1095.98	1066.27	1044.79
182	0.7	1	0.4	897.394	1082.08	1096.78	1095.3	1068.06	974.923	863.903	772.263	709.659	656.932	609.381	569.109	529.666	563.226	622.643	695.404	656.653	580.997	492.15	441.222	440.153	440.235	496.177	749.979	1087.37	1097.22	1100.77	1102.54	1101.66	1072.82	1014.01	916.302	844.773	787.701	820.516	1093.77	1080.45	1100.03	1101.65	1097.81	1097.05	1086.94	1006.49	912.415	845.343	786.564
1152	0.1	2	1	0	0	0	0	0	0	0	0	0	0	0	0	0	0	0	0	0	0	0	0	0	0	0	0	0	0	0	0	0	0	0	0	0	0	0	0	0	0	0	0	0	0	0	0	0	0
1295	8	0.6	0.1	439.393	472.038	468.742	469.941	464.778	453.646	430.694	407.735	388.845	376.99	365.929	359.842	353.49	358.101	331.522	173.262	85.7662	76.5111	60.6185	56.3494	62.6954	66.6273	60.287	31.8007	35.6868	43.4664	52.7239	59.7256	57.5569	35.5224	33.599	36.0489	36.9802	44.0451	63.0378	32.738	30.7158	51.9356	46.292	44.0708	42.8851	21.1106	16.45	25.6245	34.526	38.3262
629	6	1.5	0.1	803	803	803	803	803	803	803	803	803	803	803	803	803	803	803	803	803	803	803	803	803	803	803	803	803	803	803	803	764.893	789.181	803	803	803	803	803	803	803	803	803	728.653	519.327	296.938	320.586	499.188	803	803
1266	0.9	1.5	0.6	366.475	375.245	376.836	378.545	384.162	385.768	379.996	374.051	368.184	363.791	359.451	355.64	350.326	345.845	341.586	336.211	332.095	329.772	326.418	320.117	317.282	314.719	313.002	310.241	307.289	305.189	303.091	301.714	303.281	301.516	297.616	292.239	286.536	282.212	279.986	294.447	298.315	331.62	364.021	372.585	383.132	396.435	391.402	388.628	385.665	381.575
1176	0.6	0.1	0.1	311.395	300.92	289.417	273.576	203.317	108.612	64.6999	65.8638	75.2418	19.5239	26.3556	37.9146	1.68716	8.29698	31.252	33.5311	43.1012	53.6729	63.3811	65.8611	67.4918	65.8041	52.1471	49.9391	51.4408	60.7532	65.317	65.4362	64.0566	50.3286	33.1658	32.2962	40.3396	43.2662	44.4326	47.4847	54.0446	55.3471	44.0906	49.5651	53.9617	64.3771	64.1085	64.6937	61.0054	61.8831
758	1.5	9	1.5	609.119	624.375	635.047	633.964	609.163	576.44	541.534	516.029	510.757	500.495	495.807	491.533	483.887	476.385	468.1	465.896	456.484	442.757	424.188	396.378	381.379	392.649	388.865	384.62	385.354	382.628	378.943	379.881	366.634	357.483	354.18	345.021	334.015	356.993	376.907	387.211	400.321	407.087	411.067	407.325	389.502	379.14	376.488	354.674	343.583	352.233
1242	6	1.5	0.8	640.1	640.044	639.182	634.416	623.724	602.111	562.817	516.35	511.175	640.1	640.1	640.1	640.1	640.1	640.1	640.1	639.289	624.271	594.556	576.956	596.844	615.694	621.699	627.941	633.674	640.019	639.751	635.724	625.678	595.434	540.586	487.556	452.286	437.833	430.843	430.265	522.79	635.781	640.1	640.097	632.799	610.163	558.485	497.548	459.737	447.266
1236	3	0.8	1	495.531	492.341	489.076	485.028	480.458	470.328	450.805	430.594	419.261	414.778	410.982	409.085	409.701	409.987	411.571	415.123	416.442	414.727	405.741	392.814	385.635	400.041	415.589	421.193	426.009	430.728	436.266	441.678	446.119	451.321	456.141	450.972	447.645	447.772	448.562	448.697	448.224	448.197	449.475	452.349	454.136	451.942	443.446	432.186	424.375	420.705
1194	1	1.5	0.7	331.497	329.843	329.268	326.666	322.783	315.604	303.547	290.077	278.457	273.686	270.281	267.755	265.692	262.047	258.992	256.58	253.479	249.497	242.254	233	225.583	273.76	332.198	337.352	341.391	350.452	351.903	351.843	360.545	352.198	351.191	352.606	350.288	346.806	342.855	338.166	332.679	327.371	322.675	318.194	313.009	307.062	298.645	289.141	280.266	272.287
[truncated: 434 more columns]

## Sheet: Outflow(OBS inflow-No Demand)
grand_id	q1	q2	q3	1980-01	1980-02	1980-03	1980-04	1980-05	1980-06	1980-07	1980-08	1980-09	1980-10	1980-11	1980-12	1981-01	1981-02	1981-03	1981-04	1981-05	1981-06	1981-07	1981-08	1981-09	1981-10	1981-11	1981-12	1982-01	1982-02	1982-03	1982-04	1982-05	1982-06	1982-07	1982-08	1982-09	1982-10	1982-11	1982-12	1983-01	1983-02	1983-03	1983-04	1983-05	1983-06	1983-07	1983-08	1983-09	1983-10
753	1.5	0.9	0.1	1374.88	1243.78	1381.6	1339.6	1380.92	1789.03	1745.01	1451.94	1511.35	1801.31	1343.15	1378.64	1380.62	1247.3	1383.45	1329.45	1372.29	3190.75	2052.94	1438.21	1335.93	1381.08	1338.07	1381.84	1375.27	1247.46	2223.03	2573.09	2054.32	3853.52	3647.68	1729.21	1338.42	1801.85	1383.65	1383.2	1423	1772.58	1993.85	1354.43	1380.1	2312.11	2670.31	1430.91	1336.08	1379.21
870	1.5	0.9	0.3	1708.16	1558.83	1740	1704.6	1714.16	1659.66	1721.14	1723.54	1665.52	1720.21	1670.71	1724.63	1717.93	1558.55	1771.03	1660.39	1707.77	1665.51	1727.94	1720.36	1663.34	1713.66	1644.92	1708.44	1711.88	1565.4	3070.69	2806.03	3632.62	2199.48	2015.62	1719.5	1662.28	1717.98	2104.28	1945.69	1718.08	1866.77	3025.19	1877.24	1849.51	1659.74	1714.16	1721.57	1673.64	1705.89
597	0.5	0.7	0.1	786.369	738.089	894.333	836.648	1337.41	2730.16	1755.67	770.172	754.263	760.474	742.669	771.762	759.427	653.34	715.316	662.478	766.635	910.601	784.461	645.413	657.287	756.566	684.319	650.268	601.943	598.03	792.551	767.472	1244.7	1492.11	1371.55	897.23	859.112	894.499	855.251	855.888	791.314	749.298	917.317	945.152	1365.38	2655.4	3352.51	2233	1641.46	977.428
307	0.8	0.5	1.5	576.648	514.635	587.818	607.543	611.321	815.145	873.441	625.303	540.232	556.071	581.049	562.365	601.715	538.179	648.416	589.696	713.39	1275.71	961.713	630.513	534.804	541.591	531.058	555.122	531.792	569.615	781.449	739.568	735.237	1124.61	1158.04	710.521	590.06	604.554	579.57	595.154	597.451	557.13	656.912	595.764	667.508	751.574	818.575	707.054	586.275	560.549
1753	2	9	0.7	4714.4	4019.12	13054.4	5966.31	4796.5	2765.37	2822.78	2739.01	2580.92	2561.43	2429.34	2554.14	4743.7	3422.32	2849.78	2340.89	1738.21	2441.05	2667.03	2508.78	2379.55	2117.48	1724.54	2955.63	11515.4	6639.48	7646.59	3270.51	2143.04	1954.41	2320.74	3176.38	2905.27	2713.21	2700.4	11725	6403.39	4624.06	4428.5	7356.81	9671.4	4484.04	3093.49	2930.15	2147.47	1476.6
297	1.5	8	0.9	573.16	468.687	646.693	905.741	965.204	1269.52	843.082	652.492	623.206	632.607	593.829	590.074	601.806	504.233	547.6	536.944	709.087	2358.4	2231.83	954.947	630.797	641.616	603.736	598.945	564.495	496.13	560.843	524.147	668.37	2252.57	1564.02	783.495	631.645	649.101	616.135	616.566	602.691	526.576	578.817	555.986	685.323	1788.81	1655.12	759.267	629.829	638.221
1036	1.5	0.7	0.5	201.499	206.024	365.595	420.217	345.416	338.804	467.401	314.635	240.161	148.369	164.434	156.816	115.566	149.96	155.665	134.842	170.386	185.877	174.009	198.393	137.791	120.927	152.846	147.998	295.7	726.765	599.043	427.228	212.487	358.564	494.322	303.403	271.633	166.775	180.077	1236.27	886.54	370.42	551.787	722.739	925.631	496.554	453.847	411.744	334.417	163.832
989	7	2	0.9	49.5172	395.739	624.775	1609.8	210.405	120.46	53.4337	121.191	33.8998	32.5401	31.2325	33.0515	32.7658	29.5028	33.0744	31.6809	499.74	1528.14	2225.11	551.363	197.441	482.34	738.737	474.93	428.736	1284.64	1106.95	322.883	881.252	2212.4	1054.6	744.991	235.034	141.95	117.321	1361.5	549.977	620.485	534.707	2451	2553.06	1432.29	722.651	71.4438	86.7529	295.897
1026	6	0.6	0.1	95.6528	132.552	203.916	242.073	161.634	156.325	161.577	128.383	108.445	84.0688	89.1998	96.9415	79.955	70.8631	93.1109	94.0196	143.583	205.961	226.852	200.702	154.326	130.983	144.166	120.087	168.981	527.068	253.483	287.769	168.428	428.269	254.315	200.926	161.311	128.935	110.843	947.669	372.157	328.85	372.061	658.769	692.635	209.08	322.909	183.112	154.906	130.183
1848	2	9	1.5	274.571	206.99	315.717	405.608	323.232	270.58	264.772	177.099	58.8335	84.6349	164.857	74.6792	83.5885	147.29	152.786	195.708	146.74	129.732	89.5095	44.2006	76.4528	59.6931	59.4875	90.8636	266.321	283.494	193.804	327.265	158.079	117.65	62.0602	118.694	80.8249	217.339	102.72	397.529	385.266	294.989	321.753	491.015	779.545	304.177	286.51	277.841	248.642	253.118
1869	1.5	1.5	1.5	186.161	224.681	278.442	517.674	254.327	237.347	238.629	218.799	192.78	219.243	109.391	66.4484	61.1329	72.6202	90.7629	107.818	62.5798	67.5897	64.6676	59.816	57.7718	57.7473	54.941	54.7729	79.5433	79.4516	94.4235	301.714	289.406	93.1813	67.1784	67.6817	68.0501	69.3896	79.2647	442.266	324.471	555.676	391.717	586.737	630.768	248.908	243.57	236.239	214.282	208.078
7313	1.5	0.6	0.2	272.649	234.964	280.917	369.055	667.493	652.847	606.369	386.455	258.252	360.404	393.951	324.907	300.55	261.981	296.578	335.197	632.596	1007.1	562.948	489.08	232.586	269.452	329.088	323.695	265.014	288.587	356.533	436.135	669.024	860.684	806.565	549.574	508.923	541.004	436.758	355.526	346.981	310.502	388.907	412.537	535.141	685.87	667.118	561.412	343.222	509.954
1042	1	1.5	0.7	80.8119	120.043	153.329	217.979	115.17	114.131	44.8147	35.4971	34.0825	35.0048	34.3247	44.8004	39.7051	46.2101	65.2534	67.1012	111.319	75.3165	47.6312	40.4044	33.747	34.0595	34.2729	34.8505	74.531	242.844	183.433	99.9374	142.242	150.511	70.3247	52.2732	34.7371	34.5859	63.9097	291.883	242.157	197.311	213.748	249.457	268.067	220.539	210.576	181.312	34.1889	59.0243
884	0.4	0.1	0.1	1569.4	1471.38	1605.62	1558.29	1767.88	2087.6	2320.59	2751.26	2131.88	1952.18	1959.38	1596.97	1574.65	1415.68	2347.33	2718.02	2247.1	1783.38	2162.04	2339.77	1782.73	1482.71	1093.13	1280.83	1511.44	1042.01	1456.6	1735.39	1709.6	1238.55	2005.27	2291.7	2234.48	1770.72	1981.53	2033.71	2203.41	1588.35	1375.27	761.178	963.881	1577.23	1464.95	2765.23	2048.6	2049.05
1144	3	10	1.5	1286.78	1628.94	1097.5	1088.98	1175.27	845.456	594.584	399.408	383.281	1431.43	891.578	1268.11	816.705	844.965	1047.72	783.326	907.973	1974.33	905.375	768.842	577.937	1645.48	2347.16	1247.12	1030.93	2477.25	1393.54	1011.77	2024.25	2677.18	2291.69	1046.8	877.445	768.851	907.601	3471.27	2345.49	1936.64	1836.75	1422.64	1714.26	1159.44	1108.42	872.526	671.793	657.174
1006	0.8	1.5	0.8	32.9189	45.0234	85.6001	140.846	71.9452	42.6304	35.5656	25.5512	23.4769	25.688	26.3769	24.5105	21.164	20.0908	26.6776	26.1413	45.4713	105.986	155.552	52.2072	29.1959	33.2387	82.5611	55.4932	64.8471	124.291	98.5871	66.8262	68.446	125.475	72.7434	45.8491	67.4562	35.2592	28.088	196.018	111.997	56.1701	47.5435	168.407	246.811	102.842	76.4681	37.9523	28.6304	69.5675
1048	1.5	5	0.1	125.073	136.042	166.273	1509.94	1106.38	1016.03	206.035	137.205	128.806	119.288	111.166	108.124	108.952	96.9512	99.7129	321.24	650.532	355.025	286.392	166.178	123.744	258.379	710.32	152.782	135.848	415.444	512.319	138.276	2491.47	2048.64	966.914	206.051	42.5707	30.5174	34.0689	51.1335	158.076	271.775	596.316	1723.32	1161.02	785.078	690.989	93.8868	43.8312	484.534
1032	8	1	0.2	30.2631	63.2984	177.169	476.564	210.912	84.7311	6.79989	12.1485	15.5874	11.3437	3.16873	10.2982	2.91867	6.53578	13.2851	28.8853	70.1856	98.5931	106.863	32.3884	50.9514	41.9532	157.756	60.2423	54.1668	172.086	213.813	111.445	176.641	817.697	480.494	88.7556	43.8781	13.8977	22.615	107.51	167.177	285.153	270.399	798.991	638.909	281.503	162.335	56.7535	41.1862	89.4499
355	2	0.6	0.7	189.326	162.797	200.503	179.719	194.496	288.887	340.176	237.021	237.371	232.621	205.097	201.826	175.798	144.184	162.695	132.128	183.974	356.237	293.842	197.016	180.734	202.632	202.868	206.243	157.53	158.482	226.5	191.732	146.603	262.207	370.101	302.433	223.919	285.4	249.897	241.062	239.991	222.423	242.573	211.975	223.204	554.907	698.847	268.279	224.774	247.107
1101	8	8	3	83.9487	78.9892	452.936	542.226	87.9584	130.456	85.7233	83.1543	77.6556	79.8394	77.5552	86.9597	78.8792	74.5666	84.2058	84.5529	82.4311	84.1436	87.276	85.0459	82.0454	81.7295	78.168	77.928	80.9131	80.3615	105.109	183.139	109.098	82.5713	84.7758	83.4206	83.3493	82.1453	78.2166	282.132	477.442	191.455	219.396	320.759	356.683	156.558	89.0616	84.5211	78.5721	78.6852
1023	3	3	0.3	127.605	164.486	244.812	775.407	137.472	96.2998	39.7014	44.5323	27.3693	25.146	24.3092	26.559	25.9625	31.719	34.9683	34.143	138.125	176.263	118.413	97.3415	47.7786	118.906	426.271	82.3701	66.1817	235.715	221.162	90.5194	455.638	1118.36	231.647	62.5349	35.9405	34.5531	33.2733	43.8131	54.5502	116.707	247.401	1011.38	347.024	367.746	379.062	43.9353	34.6667	71.9151
1864	1	9	1	127.341	65.1884	203.617	265.789	206.262	101.143	18.1073	12.1845	20.7159	46.955	62.8104	28.1881	25.8997	76.5354	60.9591	58.7268	41.156	28.305	21.9158	16.5261	20.9229	35.5809	26.2306	25.6814	120.142	66.2069	46.3912	178.806	51.8292	43.266	26.4856	88.3381	115.188	116.59	49.9934	259.221	241.936	192.723	214.962	210.729	207.904	193.056	182.13	163.512	90.6189	39.1472
1021	9	1	8	18.6744	18.7487	20.7132	26.5171	29.9022	61.9517	29.4569	18.3162	17.1781	16.8505	15.9002	17.3082	16.9891	15.0846	17.0377	16.4224	23.1174	25.8668	18.1461	18.3012	23.5862	20.6129	34.4335	23.4775	19.409	18.7442	23.6684	20.2831	140.137	176.641	152.341	27.9211	17.6899	17.4696	16.8443	18.2936	17.9012	17.2932	23.2071	32.9819	42.0225	127.116	55.8703	17.9982	18.2437	19.6382
1120	0.9	7	0.8	1.26283	1.17695	1.33082	1.31153	1.36574	1.65785	1.30174	1.22915	1.21007	1.3065	1.20555	1.28118	1.23293	1.11797	1.37339	1.30987	1.45242	9.917	1.359	1.38807	1.38404	21.7623	4.1217	1.28174	1.28145	3.09895	11.0364	1.43719	111.688	109.172	24.5618	1.56274	1.24915	1.27078	1.21678	1.34496	1.39608	13.186	5.43317	5.11631	35.3808	8.87393	1.48848	1.26434	1.20622	76.0545
182	0.6	0.7	0.1	1054.38	858.725	586.856	495.562	470.036	246.671	198.291	177.107	167.196	169.592	157.032	167.49	164.305	153.68	173.905	194.902	186.507	161.932	148.502	72.415	79.6426	76.1008	154.251	909.38	750.419	1055.81	893.059	1343.67	904.098	442.259	223.245	182.061	174.11	204.619	402.427	752.674	615.318	927.706	1488.43	843.967	983.802	899.68	448.9	224.375	179.929	188.633
7311	8	0.7	9	1.67273	1.76799	18.4846	88.0619	11.7274	1.99713	1.64719	1.62774	1.55819	1.57318	1.51569	1.58998	1.55979	1.40299	1.57108	1.55712	1.94395	2.97249	1.83718	1.68417	1.61891	1.74508	4.78497	4.00681	1.78271	11.6592	26.4709	2.39468	37.6515	154.199	99.1368	3.83117	1.69624	1.6485	1.60308	7.03573	11.2077	58.4113	27.9233	144.414	91.807	8.70019	4.44101	1.67609	1.56693	2.99658
1755	1.5	1.5	0.8	80.557	81.3909	136.302	111.788	75.4985	66.8569	62.4676	56.8847	50.1931	47.2415	42.1997	46.4571	48.7349	106.064	96.4961	74.9399	73.0682	141.3	76.7295	61.4587	54.7568	51.8088	48.813	83.9305	190.242	245.722	131.28	94.6682	85.2059	69.4479	64.3281	59.5134	89.3334	60.5354	53.2283	92.3078	97.9446	149.319	83.188	166.351	339.626	224.565	159.578	58.8171	52.1314	52.0499
1192	5	3	0.8	370.712	503.757	236.991	393.287	432.033	61.7559	47.7071	44.5018	42.5147	44.9423	44.4305	49.3731	89.5614	44.3887	137.508	48.3634	298.902	502.779	125.72	45.7553	43.773	92.3944	49.8146	91.0352	91.4346	193.255	101.285	94.3456	142.945	101.753	100.421	46.3993	43.6658	47.808	89.087	522.552	193.388	499.166	356.993	198.628	147.478	101.451	146.404	50.049	44.2811	45.2277
541	9	9	0.8	73.6636	63.6146	68.0897	81.7718	164.947	207.723	193.972	151.309	137.994	123.723	78.4135	77.131	71.5577	60.4231	66.2343	63.3365	76.7027	107.986	94.1087	71.3398	54.4205	50.1965	44.1813	44.2412	43.2929	37.7859	43.5048	57.7394	124.774	185.674	171.052	114.312	105.408	100.73	79.5437	73.1598	66.3681	59.148	68.3917	74.3864	108.478	218.426	229.23	177.902	146.227	89.6194
1716	0.7	10	0.9	26.5633	29.8417	54.3001	52.1681	26.6645	21.0185	18.567	16.1116	13.7125	12.9967	12.1536	16.7858	17.284	34.6809	30.7935	18.4531	36.2473	61.6984	22.5679	18.6515	16.0574	14.56	13.3119	14.8095	49.2901	86.3811	75.8458	35.211	25.2121	24.2807	20.9485	17.9093	15.5362	15.3081	14.0955	124.709	79.7368	44.8471	37.274	57.0412	152.994	68.0695	28.4403	22.9509	20.3165	35.0819
1883	2	5	8	45.9144	45.1719	47.4109	48.5083	50.3007	47.7597	48.2714	47.838	42.8379	41.7154	41.9948	45.0102	44.5112	40.5154	45.6753	44.5924	48.4189	51.5284	48.0767	47.3375	45.5207	46.2156	43.8341	44.8029	44.9634	41.1397	45.9593	45.1422	47.1111	44.889	41.9148	107.697	158.321	23.6719	21.3674	66.0403	58.778	153.089	72.2719	40.9382	78.3572	70.1815	44.5784	43.2321	40.297	39.4034
895	0.5	0.6	0.1	1425.27	1063.01	1543.8	2103.87	2302.29	2145.88	2584.89	2694	2528.26	2652.62	2461.67	1211.87	1050.43	917.865	1641.38	2431.52	2472.12	2312.25	2529.48	2402.55	2455.96	2545.56	1376.63	1072.87	1107.95	968.364	1277.11	2095.09	2201.98	1947.34	2301.52	2377.7	2343.36	2595.93	2865.62	1982.94	1826.31	1494.02	1632.32	1199.4	1864.64	1587.95	2081.43	2636.2	2564.91	2670.82
1093	1	5	0.9	21.3881	35.9536	35.0055	70.5025	162.49	41.7677	18.8771	12.7357	11.3692	13.8214	17.5275	24.1937	18.2126	17.8847	82.8919	38.3273	170.598	273.59	37.6873	20.248	17.2541	120.269	79.5148	22.4305	29.9829	325.361	106.799	26.6657	187.637	300.734	25.0827	14.5844	12.2786	11.8007	12.1713	270.864	42.7641	82.424	101.245	120.985	349.994	107.233	26.1544	15.8254	12.6871	11.9005
1709	0.9	1.5	0.8	166.086	162.212	329.428	276.973	149.919	64.6326	103.264	90.5631	56.0395	54.4958	52.7269	77.4983	59.8061	270.96	220.473	299.722	329.551	346.014	72.2442	108.798	74.4744	96.0334	86.9984	225.64	257.402	348.35	482.076	158.628	97.0305	243.202	75.741	63.5894	54.8584	55.4362	86.4251	188.113	65.5723	153.806	257.545	307.283	215.116	101.441	126.75	58.3002	50.3068	49.6265
1017	8	1	4	34.1787	53.9428	63.5821	75.0751	36.856	22.4109	11.4321	13.3395	17.641	13.714	20.3561	19.4425	18.7672	22.7123	20.672	33.4588	109.304	71.9123	68.8363	32.8313	11.7398	20.2646	59.7414	29.6483	53.9906	220.22	65.2364	72.4076	45.7012	47.0835	21.0158	70.7164	123.018	40.7353	30.5115	182.17	116.712	97.586	96.9837	129.059	226.897	106.756	95.4031	102.82	80.9568	25.8097
[truncated: 434 more columns]

## Sheet: Storage(OBS inflow-No Demand)
grand_id	q1	q2	q3	1980-01	1980-02	1980-03	1980-04	1980-05	1980-06	1980-07	1980-08	1980-09	1980-10	1980-11	1980-12	1981-01	1981-02	1981-03	1981-04	1981-05	1981-06	1981-07	1981-08	1981-09	1981-10	1981-11	1981-12	1982-01	1982-02	1982-03	1982-04	1982-05	1982-06	1982-07	1982-08	1982-09	1982-10	1982-11	1982-12	1983-01	1983-02	1983-03	1983-04	1983-05	1983-06	1983-07	1983-08	1983-09	1983-10
753	1.5	0.9	0.1	29594.7	29478.2	29550.7	29710.1	29555.1	30014.1	30218.8	30198.8	30214.4	30220	30194.3	29872.9	29800.8	29773.9	29926.3	29549.2	29229.8	30171.2	30214	30128.9	29870.6	29786.3	29855.9	29879.2	29606.4	29669.6	30173.3	30219.8	30219.7	30220	30220	30219.3	30097.5	30207.6	30193.6	30146.8	30176.4	30215	30217.6	30114.5	29834.8	30170.3	30220	30165.9	29907.9	29733.7
870	1.5	0.9	0.3	27966.5	28255.5	28833.8	29012.3	28560.5	28262.3	28040.5	27932.8	27819.4	27788.2	28008.5	28228.2	28203.4	28591.6	29044.5	28769.8	28249.7	28224.7	28527.5	28990.7	28824.5	28507.7	27993.8	27809.8	27717.6	28381.3	29099.7	29090.4	29083.1	29106.7	29097.4	28958.4	28738.3	28700	28992.6	29095.7	28889.2	29019.8	29110	29108.8	29045.5	28612	28243.7	28018.9	28178.9	27852.4
597	0.5	0.7	0.1	15179.3	15053.7	15090	14982.7	16316.8	17835.7	17512.5	16770.7	16413.3	16005.9	15696.8	15415.5	15109.6	14751.4	14406	13971.9	13717.4	13789.4	13384	12850.2	12513.7	12343	12066	11758	11393.1	11197.1	11147.8	11027	11692.9	12706.4	13251.2	12984.1	12928.7	12904.8	12892.3	12854.3	12690.8	12631.7	12745.5	12879.6	13903.1	17077.1	19435.2	19095.2	18028.9	17487
307	0.8	0.5	1.5	16075.3	15813.1	15590.6	15417	15109.3	15423.6	15588.4	15150.9	14756.5	14468.1	14311.7	14049.3	13893.4	13706.1	13611.5	13374.4	13409.7	14801.7	14934.4	14451.5	13984.5	13662.4	13412.2	13178.5	12910.3	12860.1	13022.5	13038.7	13013.2	13975.8	14605.4	14227.7	13915.6	13718.3	13530.5	13370.4	13204.5	13066.8	12983.8	12767.1	12666.3	12647.8	12648.5	12352	12032.6	11774.5
1753	2	9	0.7	6914.98	7559.22	7560	7560	7550.15	7487.1	7527.92	7263.47	6823.47	6305.81	5960.19	5935.95	4588.83	2619.17	2284.71	2036.08	1398.35	1916.71	1830.75	1706.33	1610.49	1335.85	1062.16	1853.9	2176.1	1734.05	1986.86	858.904	748.179	817.941	1054.67	1699	1733.25	1681.81	1836.35	1985	848.902	1776.01	2114.25	2339.32	2120.83	711.953	784.831	898.521	779.316	805.554
297	1.5	8	0.9	5987.41	5575.4	5218.22	4661.81	5825.51	7254.81	7433.21	7366.72	7159.79	6917.87	6622.1	6294.72	6117.26	5796.6	5526.01	5325.28	6074.99	7432.55	7434.2	7433.02	7349.68	7119.45	6819.71	6471.43	6068.74	5744.89	5531.91	5283.39	5654.25	7199.1	7434.2	7428.81	7367.26	7254.75	7019.35	6705.65	6414.8	6119.72	5886.31	5678.52	6144.84	7413.68	7434.2	7427.77	7316.89	7061.21
1036	1.5	0.7	0.5	1722.09	1670.41	1699.04	1719.85	1627.72	1606.74	1645.64	1507.78	1411.69	1290.99	1253.51	1176.25	1090.34	1071.02	1011.24	950.951	937.627	908.917	863.354	844.818	775.7	734.918	722.379	683.52	757.162	1104.85	972.496	895.703	780.942	892.053	917.238	828.999	786.303	710.151	699.311	1558.1	1371.63	1253.2	1312.73	1511.59	1759.88	1551.96	1562.54	1497.95	1418.13	1272.52
989	7	2	0.9	2555.08	2580.32	2582.85	2857.95	2546.2	2555.21	2549.99	2551.42	2545.39	2536.48	2536.15	2543.79	2541.56	2543.28	2546.43	2541.18	2659.58	3104.85	3425.62	2617.42	2548.74	2604.95	2585.75	2551.13	2560.05	2769.31	2649.65	2547.8	2702.8	3447.25	2663.03	2656.66	2546.64	2559.88	2559.57	2865.51	2566.55	2561.51	2572.66	3889.25	4063.68	3424.69	2731.68	2558.27	2556.06	2562.77
1026	6	0.6	0.1	1282.54	1332.22	1422.97	1566.74	1541.49	1557.86	1555.45	1511.64	1455.04	1382.16	1346.56	1311.3	1251.02	1208.12	1184.88	1161.01	1210.42	1330.95	1421.42	1485.34	1474.98	1457.4	1479.77	1444.66	1502.93	1735.61	1675.52	1678.03	1657.02	1718.51	1657.65	1670.24	1659.73	1615.56	1573.25	2041.38	1690.89	1710.3	1694.98	1767.56	1750.85	1653.85	1696.11	1663.22	1654.71	1619.09
1848	2	9	1.5	2610.31	2602.16	2831.38	3291.96	3242.98	3044.85	2846.95	2646.03	2600.55	2599.94	2614.59	2599.45	2600.26	2601.16	2600.46	2612.84	2602.42	2598.28	2600.67	2599.71	2599.5	2598.68	2599.41	2600.06	2637.39	2631.19	2600.68	2631.78	2602.93	2600.27	2599.7	2602.24	2598.15	2645.27	2601.94	2931.02	3373.71	3434.32	3516.03	3663.89	3706.22	3563.71	3333.51	3119.15	2896.67	2714.75
1869	1.5	1.5	1.5	2351.17	2366	2718.99	3307.57	3270.15	3127.33	2976.05	2779.23	2580.21	2466.87	2346.68	2324.93	2288.89	2334.26	2335.96	2333.97	2290.25	2299	2273.89	2223.41	2187.65	2149.55	2115.77	2080.72	2175.75	2288.1	2338.21	2533.44	2488.71	2340.89	2322	2313.74	2321.22	2327.68	2318.99	2798.56	3336.57	3348.33	3316.05	3337	3337.42	3234.99	3087.41	2925.18	2746.56	2577.13
7313	1.5	0.6	0.2	1728.05	1701.7	1737.45	1761.53	1876.07	2177.04	2218.56	1807.95	1723.86	1757.27	1756.71	1755.65	1754.91	1750.56	1756.61	1754.15	1868.12	2485.05	2398.58	1956.69	1686.49	1683.97	1753.45	1754.63	1721.11	1733.99	1756.89	1757.64	1837.78	2273.95	2511.73	2219.18	1914.39	1794.96	1756.11	1754.18	1756.64	1757.26	1757.06	1757.86	1762.48	2001.3	2151.54	1888.08	1757.33	1756.19
1042	1	1.5	0.7	1708.64	1711.93	1709.8	1720.46	1708.17	1712.42	1705.15	1699.33	1694.96	1695.24	1704.63	1707.99	1707.89	1708.05	1708.95	1708.49	1708.94	1708.17	1708.75	1705.8	1697.26	1691.14	1702.37	1704.22	1710.18	1802.26	1720.16	1708.47	1709.04	1708.61	1708.95	1707.78	1706.91	1703.05	1711.9	2168.13	2187.16	2082.23	1975.87	2027.56	2142.27	2053.33	1931.89	1774.08	1704.23	1707.93
884	0.4	0.1	0.1	1906.54	2136.17	2023.07	1979.19	2166.42	2329.87	2328.6	2340.54	2342.21	2332.45	2317.44	2115.41	1919.26	1759.89	1466.51	878.563	868.564	875.295	876.363	862.306	863.709	889.989	888.314	889.29	879.485	893.068	881.644	882.857	865.132	894.396	876.171	881.327	868.463	875.888	872.595	870.181	868.559	875.582	880.606	897.515	900.328	883.084	893.616	869.732	861.141	878.089
1144	3	10	1.5	1557.34	1558.11	1550.03	1555.48	1558.72	1557.24	1560.27	1569.45	1568.63	1564.41	1557.14	1554.11	1556.69	1558.58	1558.17	1559.92	1560.28	1610.81	1554.2	1558.15	1562.56	1734.98	1857	1553.6	1554.79	1788.7	1550.62	1553.03	1673.1	2245.44	1844.92	1556.61	1563.69	1564.52	1558.06	2221.48	1907.56	1560.19	1535.82	1547.94	1549.97	1550.64	1550.38	1560.26	1560.43	1563.6
1006	0.8	1.5	0.8	524.536	527.224	542.758	596.146	549.424	522.935	494.198	465.02	442.913	427.606	416.015	402.007	384.288	373.601	364.269	353.366	363.916	420.337	439.616	398.76	376.217	374.085	402.972	383.072	386.896	445.19	422.996	404.361	407.928	456.029	416.235	404.565	412.044	385.448	375.732	511.324	462.572	443.05	424.665	539.464	633.133	571.525	558.108	515.269	491.399	523.642
1048	1.5	5	0.1	1006.9	1120.03	1268.08	1393.1	1382.31	1382.19	1348.84	1251	1192.23	1106.18	1040.83	979.485	943.363	914.018	872.078	796.29	296.107	170.888	172.083	184.434	188.851	189.588	169.337	164.648	187.849	181.092	166.84	153.566	240.592	71.4783	78.3876	92.044	79.3382	92.6429	114.814	157.801	191.905	185.066	174.947	105.603	77.3489	135.565	143.739	98.5317	123.452	184.802
1032	8	1	0.2	192.734	207.511	243.686	464.707	292.407	221.773	191.019	191.141	191.513	190.418	190.293	191.599	189.542	191.023	191.715	195.833	202.34	210.083	207.648	192.31	196.09	203.356	245.824	193.126	195.835	266.62	256.012	205.43	291.173	581.491	405.049	229.414	196.207	191.345	195.547	221.189	227.94	338.548	280.807	622.168	664.682	514.892	430.537	327.597	278.446	289.664
355	2	0.6	0.7	738.383	708.378	704.489	699.395	715.223	816.923	904.524	779.084	765.508	753.392	738.239	717.753	701.548	697.075	698.21	687.319	721.875	997.665	1001.78	853.043	760.741	739.492	729.167	716.162	696.725	703.303	725.79	708.52	691.329	804.38	984.415	961.838	896.725	996.22	1028.03	1047.93	1074.82	1113.29	1142.77	1122.73	1127.78	1258.32	1335.57	1172.42	1138.22	1189.86
1101	8	8	3	1530.32	1579.64	1624.87	1703.74	1687.29	1681.07	1653.51	1602.09	1541.93	1503.38	1481.57	1528.52	1484.19	1486.1	1496.36	1552.97	1530.95	1625.07	1676.62	1643.15	1620.5	1569.86	1530.28	1480.95	1469.41	1586.26	1670.02	1701.46	1686.89	1649.78	1622.79	1592.84	1611.5	1568.57	1529.77	1640.29	1702.92	1703.77	1694	1691.28	1703.95	1698.95	1691.12	1638.57	1572.45	1513.45
1023	3	3	0.3	649.384	646.78	650.136	754.731	643.444	648.687	641.038	643.595	648.952	643.784	640.959	648.242	649.098	648.896	649.411	648.783	650.135	646.694	647.349	648.641	648.44	649.057	678.783	647.616	649.528	655.854	646.939	646.859	712.938	751.036	638.189	647.143	649.13	647.431	647.766	651.476	649.743	649.474	656.681	905.728	642.094	646.898	655.295	646.983	647.082	649.826
1864	1	9	1	1048.88	1044.24	1147.59	1264.16	1164.23	1055.48	1042.91	1045.04	1045.74	1045.76	1045.05	1045.11	1045.15	1047.55	1045.89	1046.16	1044.7	1044.48	1045.29	1044.45	1045.8	1045.34	1044.56	1044.59	1049.83	1045.55	1045.03	1060.52	1043.95	1046.3	1045.69	1048.73	1051.41	1050.64	1048.38	1205.82	1339.99	1321.69	1300.66	1340.81	1380.88	1379.79	1254.53	1112.54	1047.9	1044.85
1021	9	1	8	728.447	732.134	732.281	764.02	804.357	823.479	825.885	796.062	772.575	752.889	735.443	725.636	712.898	700.288	690.996	678.321	692.207	715.287	699.355	688.453	705.605	705.908	786.198	789.302	780.059	783.112	793.951	787.259	815.496	839.898	836.645	808.879	784.81	765.072	749.928	742.731	733.016	731.387	745.72	815.923	833.639	842.545	817.756	785.004	770.736	765.642
1120	0.9	7	0.8	783.282	784.965	785.72	786.255	787.655	797.536	791.409	784.856	781.351	781.622	780.652	781.767	780.455	779.141	782.264	783.52	787.639	804.353	801.015	801.476	804.525	806.326	805.189	804.019	803.178	806.265	806.79	806.254	835.423	812.989	804.356	804.606	801.771	799.877	798.312	800.824	804.31	806.589	806.393	807.004	808.105	805.799	803.165	796.66	791.35	846.267
182	0.6	0.7	0.1	1056.02	1102.7	1102.7	1102.7	1102.7	1102.3	1096.79	1056.49	1012.1	977.788	923.256	925.466	908.182	934.35	978.348	1089.69	1076.34	972.499	836.867	769.46	769.269	769.903	884.382	1102.7	1102.7	1102.7	1102.7	1102.7	1102.7	1102.7	1100.89	1098.35	1091.8	1083.68	1102.65	1102.7	1102.7	1102.7	1102.7	1102.7	1102.7	1102.7	1102.7	1102.13	1101.37	1088.18
7311	8	0.7	9	395.94	400.177	419.768	442.029	418.793	417.534	412.617	407.352	402.836	399.504	397.359	396.137	394.269	392.487	391.072	389.998	394.202	415.11	414.376	411.391	408.16	407.511	417.928	418.541	418.411	419.334	422.17	417.731	431.021	488.51	449.423	417.55	414.687	411.984	410.631	413.339	419.126	433.979	423.037	482.904	434.083	419.159	417.908	412.834	409.559	412.148
1755	1.5	1.5	0.8	472.123	510.748	617.895	684.117	662.851	640.037	607.266	568.947	530.33	492.884	459.085	437.259	418.283	534.368	551.991	556.519	551.752	672.14	635.709	599.926	565.091	529.038	500.19	542.4	686.365	715.167	691.639	695.528	692.029	669.641	634.679	598.556	655.53	606.581	568.894	622.284	677.071	700.11	685.747	707.017	870.498	915.316	751.915	660.781	608.149	567.048
1192	5	3	0.8	626.545	617.316	615.118	620.981	612.051	620.161	620.912	604.725	592.44	595.815	605.275	634.23	631.708	633.469	632.248	623.551	631.667	609.747	608.512	584.512	590.149	614.672	626.831	627.111	628.425	630.518	623.217	630.967	627.812	619.872	621.732	613.164	605.037	621.016	632.618	620.125	615.985	618.479	613.243	612.201	624.662	626.072	621.397	621.059	613.387	608.443
541	9	9	0.8	528.69	493.957	461.083	455.571	573.595	798.217	914.539	839.868	748.178	664.891	608.056	567.579	524.602	485.301	452.108	420.882	403.532	423.013	391.064	364.908	345.434	329.479	315.956	304.556	295.282	284.22	277.104	287.784	360.811	484.379	560.465	547.125	552.142	543.821	511.003	477.595	442.091	413.284	392.117	378.342	401.126	614.316	762.577	752.588	683.747	626.834
1716	0.7	10	0.9	197.591	201.912	224.115	229.796	213.598	203.668	194.6	183.223	173.979	167.566	164.425	166.27	160.314	176.887	166.786	159.673	179.247	200.686	179.82	173.689	167.309	160.026	157.125	156.002	187.795	250.08	253.454	239.805	227.779	225.883	215.696	202.424	195.86	190.959	184.774	283.07	269.947	272.772	267.719	289.748	352.84	302.582	277.021	258.389	244.097	258.151
1883	2	5	8	570.817	594.674	601.656	633.444	651.565	658.239	651.931	640.378	609.195	581.694	568.515	563.994	555.679	555.482	556.603	553.178	556.804	588.89	583.182	582.802	578.125	571.008	565.388	560.727	565.785	567.733	566.068	565.03	566.501	561.485	537.728	502.77	330.283	274.945	262.834	268.689	278.689	282.496	278.296	282.003	284.386	273.33	267.721	268.5	271.969	271.167
895	0.5	0.6	0.1	665.216	665.712	665.273	666.1	666.1	666.1	666.1	666.1	666.1	666.1	666.1	665.914	661.596	644.007	653.306	666.1	666.1	666.1	666.1	666.1	666.1	666.1	666.1	665.29	663.949	655.999	600.81	666.1	666.1	665.546	666.1	666.1	666.1	666.1	666.1	666.1	666.1	666.1	665.396	658.922	666.1	659.241	656.789	666.1	666.1	666.1
1093	1	5	0.9	192.323	204.164	203.355	208.254	215.383	201.753	189.337	172.585	159.319	157.903	163.929	186.037	182.335	189.566	210.084	206.8	225.105	248.757	202.473	200.761	194.973	220.869	195.89	196.718	199.27	298.389	206.317	197.465	278.438	261.556	183.635	173.088	161.519	151.75	147.378	242.135	201.504	209.163	211.573	214.102	265.69	187.914	196.824	183.718	170.475	158.994
1709	0.9	1.5	0.8	508.778	508.731	509.9	509.9	509.513	505.424	501.773	501.69	484.947	454.751	447.35	505.651	500.264	509.454	509.9	509.9	509.9	509.9	504.317	509.498	506.749	495.259	508.896	509.9	509.885	509.9	509.9	509.9	503.134	509.287	508.651	502.149	476.141	459.616	474.52	509.84	506.371	509.9	509.9	509.9	509.9	509.004	501.374	486.062	439.164	410.413
1017	8	1	4	202.034	204.019	201.333	201.398	201.571	201.621	200.984	202.027	202.3	202.102	202.301	202.183	202.211	202.307	202.138	202.206	215.803	201.271	204.561	199.78	201.977	202.131	205.133	201.701	201.945	234.22	200.045	201.133	201.143	201.904	202.05	208.146	207.574	200.546	202.67	425	494.905	446.309	383.163	370.187	507.497	467.695	394.064	311.977	233.748	202.131
[truncated: 434 more columns]
