# Supplementary material for: The value of observed reservoir storage anomalies for improving the simulation of reservoir dynamics in large-scale hydrological models
Source: Copernicus journal article supplement (doi:10.5194/hess-29-4073-2025), 2025-09-03
Supplement: Supplementary file 13 [file WA_results_calibrated_against_storage.xlsx]

## Sheet: Readme
	Sheet name	Note	Inflow source	Total number of reservoirs	Number of reservoirs where downstream demand is taken into account
	Outflow(WG inflow-No Demand)	Simulated outflow (×106 m3/month) where downstream demand is not considered for irrigation and supply reservoirs.	WaterGAP	100	0
	Storage(WG inflow-No Demand)	Simulated storage (×106 m3) where downstream demand is not considered for irrigation and supply reservoirs.	WaterGAP	100	0
	Outflow(WG inflow-With Demand)	Simulated outflow (×106 m3/month) where downstream demand is considered for irrigation and supply reservoirs.	WaterGAP	21	21
	Storage(WG inflow-With Demand)	Simulated storage (×106 m3) where downstream demand is considered for irrigation and supply reservoirs.	WaterGAP	21	21
	Outflow(OBS inflow-No Demand)	Simulated outflow (×106 m3/month) where downstream demand is not considered for irrigation reservoirs.	Observed	35	0
	Storage(OBS inflow-No Demand)	Simulated storage (×106 m3) where downstream demand is not considered for irrigation reservoirs.	Observed	35	0

## Sheet: Outflow(WG inflow-No Demand)
grand_id	q1	q2	q3	1980-01	1980-02	1980-03	1980-04	1980-05	1980-06	1980-07	1980-08	1980-09	1980-10	1980-11	1980-12	1981-01	1981-02	1981-03	1981-04	1981-05	1981-06	1981-07	1981-08	1981-09	1981-10	1981-11	1981-12	1982-01	1982-02	1982-03	1982-04	1982-05	1982-06	1982-07	1982-08	1982-09	1982-10	1982-11	1982-12	1983-01	1983-02	1983-03	1983-04	1983-05	1983-06	1983-07	1983-08	1983-09	1983-10
610	0.7	0.9	0.1	2204.19	4583.12	3663.81	2124	3935.16	4905.99	2053.4	1500.43	1484.12	1556.25	1510.86	1555.91	1541.14	1378.83	1864.78	1614.93	1428.72	1316.6	1158.29	1018.57	984.852	1017	983.662	1015.96	1015.75	919.812	1640.87	1215.69	1018.85	984.979	1016.3	1013.89	979.745	1011.13	977.766	1015.22	1020.99	1046.62	2420.5	2006.42	1098.79	985.79	1017.94	1238.72	1362.18	1464.94
753	1.5	0.9	0.9	1478.18	1376.12	1537.64	2143.22	2720.69	2138.32	1572.04	1331.71	1255	1339.18	1316.35	1377.73	1419.16	1278.41	1435.92	1444.71	1570.89	2659.34	1616.73	1362.98	1252.37	1320.22	1318.4	1343.02	1376.52	1253.13	1452.16	2272.64	3604.65	3197.65	3052.4	1531.93	1381.99	1558.75	1839.69	2004.14	2368.19	1872.68	2386.1	2379.34	2890.94	3253.67	1905.61	1403.32	1299.16	1386.07
870	1.5	0.9	0.7	2302.57	2067.81	2342.8	2211.18	2106.32	2060.16	1932.99	1883.52	1812.85	1871.58	1946.21	2052.84	2059.3	1877.51	2123.68	1880.34	1972.87	1824.29	1866.36	1784.57	1701.77	1753.08	1693.06	1747.86	1745.6	1575.38	1765.17	2753.49	4159.2	2842.38	2334.01	2267.97	2122.12	2472.89	2410.88	2372.81	2317.39	2069.32	2583.37	2722.52	2660.93	2274.23	2068.03	2212.31	2220.21	2313.87
597	0.5	0.9	0.2	1034.04	2760.22	3108.63	3599.92	6398.19	3648.5	884.412	654.945	629.139	653.582	636.329	658.425	658.612	593.563	653.474	633.688	1477	1027.22	654.262	633.006	591.239	599.697	592.997	619.809	616.249	552.54	650.499	663.412	1324.63	2137.67	722.989	650.498	623.182	648.629	633.544	658.004	659.064	1021.37	2870.65	2526.59	4198.83	4225.24	1376.41	660.2	637.451	696.509
307	0.5	0.6	0.2	336.632	296.228	340.589	362.095	396.096	378.185	376.821	311.374	304.242	382.064	395.823	411.733	413.38	373.001	440.132	450.217	471.845	560.25	395.086	346.791	328.864	348.027	350.091	363.515	362.341	328.057	410.038	439.346	422.027	2290.6	781.742	371.878	359.549	371.72	505.186	625.638	672.414	514.204	654.125	692.952	615.255	420.698	370.923	366.232	349.315	364.523
1753	2	3	0.5	9473.48	8617.18	19971.3	11378.5	4996.25	3700.99	2492.88	1970.62	1537.12	2107.35	1736.52	2221.05	2448.03	7444.12	6083.55	5144.01	3008.88	2631.76	1706.93	1391.36	1234.9	1121.83	984.778	1232.39	12869.1	12617.6	8830.73	5569.61	3716.26	2145.37	2296.78	1889.54	2074.85	1524.25	1407.92	13184.9	8942.31	10046.2	7401.27	11958.3	11368.7	4587.78	2723.23	2010.08	1549.33	1753.35
297	4	10	1	516.159	230.887	338.135	658.729	2599.96	1957.76	1049.95	784.669	843.602	712.826	654.73	522.638	697.847	559.172	642.952	641.099	1474.4	2619.6	2326.07	1128.97	615.926	691.704	510.201	470.483	348.113	300.441	458.47	437.796	1177.65	1782.76	1473.08	709.74	799.25	884.162	578.915	450.047	445.629	369.532	539.833	591.414	1197.6	1456.59	1373.17	881.696	672.62	511.663
1036	8	1	0.8	339.372	392.874	454.66	454.14	404.181	332.854	284.168	273.572	257.704	260.693	250.446	279.834	265.079	263.892	292.6	263.3	280.334	286.645	271.8	247.942	232.987	238.629	293.407	271.918	300.954	504.973	417.654	270.925	259.418	315.992	412.62	401.563	397.989	396.145	390.944	997.93	691.169	532.395	556.326	575.7	720.668	545.033	516.014	503.66	478.365	492.034
989	2	2	0.9	381.618	464.521	993.383	1125.91	678.691	497.749	412.744	340.916	303.177	276.398	261.656	321.475	324.649	292.765	439.001	344.979	429.498	1083.82	1420.89	707.409	546.275	482.798	774.471	751.134	701.807	1149.6	942.949	720.952	664.33	1326.49	854.962	668.57	647.829	548.68	482.622	1038.08	793.745	659.286	773.739	3097.25	1588.99	878.171	669.42	564.209	473.395	526.971
1135	0.5	1.5	0.7	235.78	173.518	204.491	172.693	189.881	276.587	186.601	145.384	134.134	326.092	215.815	323.578	248.796	173.277	296.168	248.335	237.136	293.765	244.974	204.557	181.849	1026.3	1024.87	359.074	295.361	597.299	459.233	311.031	796.9	1743.29	1245.17	457.311	329.323	289.568	255.343	273.908	329.013	783.283	673.31	531.412	569.047	409.613	300.374	245.32	210.92	526.581
1269	0.9	0.3	0.1	443.456	480.856	487.418	463.982	760.693	456.793	459.778	445.171	412.224	408.271	382.011	382.442	353.637	166.056	207.795	129.511	171.791	409.68	312.335	125.351	126.332	120.832	149.327	171.148	202.873	366.005	276.281	317.796	482.992	404.755	162.149	140.929	117.433	120.041	221.23	515.274	500.339	1283.28	949.157	614.254	730.984	480.355	464.372	455.642	427.36	424.848
1077	0.6	2	0.7	184.441	222.378	273.248	240.827	582.584	455.485	265.007	216.406	186.247	177.186	159.385	173.574	161.441	139.682	193.092	185.082	166.878	196.924	190.203	159.824	150.873	202.284	464.318	355.259	279.351	1248.35	437.755	324.56	995.378	1724.36	470.459	348.508	271.141	247.875	215.249	370.244	322.949	928.435	658.97	703.079	890.248	523.525	339.258	265.514	224.021	622.571
1026	0.8	0.5	0.1	164.865	223.04	323.155	313.486	253.506	187.2	165.112	151.66	141.833	142.255	138.231	172.132	155.694	156.258	179.414	159.345	225.458	311.502	261.066	218.187	165.729	181.12	321.928	281.05	262.596	335.983	332.559	292.963	288.422	274.441	277.335	263.709	263.617	162.617	159.72	573.728	322.503	328.533	318.609	446.575	655.64	309.813	312.247	301.889	280.995	289.97
740	9	2	2	16.8223	18.54	20.9487	19.6031	17.5041	13.6338	11.7024	10.3675	10.3278	11.4406	11.7319	12.9694	13.3955	12.1431	13.2317	12.4036	12.0247	11.0893	11.8598	11.2045	10.4567	11.4276	12.0838	13.1513	14.0591	13.6261	15.3711	14.8346	14.5068	13.6409	13.4357	12.8491	11.707	13.1631	14.9615	16.8335	17.4884	15.9667	17.9128	17.3821	16.032	13.5223	13.2295	11.6705	11.3236	13.0442
1294	0.4	1.5	0.9	57.2844	48.3985	71.6796	187.803	195.038	187.055	169.421	149.31	145.039	172.23	156.574	211.974	127.203	108.212	241.276	197.677	177.518	421.47	346.508	166.625	152.194	194.743	196.297	157.469	155.425	146.493	148.612	123.135	113.781	109.502	102.735	98.7795	91.5049	91.1578	86.1934	93.0891	105.175	122.861	171.876	159.404	112.118	111.667	102.082	93.2336	83.9523	82.1179
1848	1.5	1.5	1.5	238.461	164.312	536.695	502.156	41.8603	33.5956	17.237	13.0419	11.3664	20.9483	135.311	207.903	74.5506	217.164	136.76	141.462	43.9446	83.3522	36.094	21.9903	16.8598	18.4779	13.3259	52.5891	357.757	276.6	178.282	331.367	45.4066	34.3091	25.391	26.9811	15.8207	24.3928	51.0012	837.021	586.64	280.373	176.081	411.462	371.738	177.097	29.975	16.5325	17.1982	18.9694
1869	6	1	2	256.548	369.77	1137.46	829.891	309.934	184.397	167.532	146.633	125.914	122.4	115.228	196.346	243.272	309.326	499.637	372.762	196.14	42.727	33.0937	12.6013	14.853	15.7729	9.73011	15.2655	172.698	452.757	193.067	776.158	180.761	70.4888	41.9682	32.815	30.9044	30.3429	31.6517	1775.17	1164.19	814.627	516.691	893.474	693.254	264.833	106.158	51.9942	45.3889	36.3771
1863	1	1	0.1	113.419	105.524	569.521	123.037	107.835	104.201	106.177	103.575	97.4453	99.4183	97.7361	100.411	96.9855	103.805	112.61	99.8912	96.6969	91.3104	90.096	86.3739	80.3152	79.53	74.2765	77.5746	157.366	140.776	126.415	102.702	110.546	94.9677	94.4629	91.2337	84.7504	85.6135	85.6183	130.952	131.743	114.917	118.311	112.332	107.904	101.855	102.177	99.0001	93.1231	93.3001
1770	6	10	1	137.59	188.513	247.128	323.979	104.125	75.8789	64.3885	56.1699	48.6446	45.14	39.9648	43.6254	54.7566	131.103	177.539	105.764	94.3968	87.2323	76.4242	53.6919	46.067	42.4786	41.7025	98.6938	232.117	271.315	240.528	141.842	82.4034	65.3998	58.4777	52.434	46.7236	43.4391	41.3218	184.933	194.149	150.377	142.155	113.569	134.87	134.568	72.8916	61.1259	52.1893	48.2161
965	4	8	1	70.8001	106.648	154.116	394.235	165.53	104.153	64.6276	41.837	40.3092	38.9592	40.3531	41.4863	42.3804	35.5033	49.5379	52.3138	59.7867	67.8469	27.4974	41.4992	46.1305	37.6185	36.3376	71.3781	46.0028	87.5254	228.592	191.74	204.873	284.617	154.114	98.7984	74.3384	67.8572	57.5381	56.3843	67.7884	91.1354	149.36	476.277	200.007	155.72	150.601	72.8086	54.1011	53.0375
1247	6	8	1	139.397	72.2173	80.7172	67.0908	77.5086	87.6561	57.9809	44.4451	45.9842	346.577	115.928	257.24	160.962	97.0034	148.695	129.207	117.673	93.0271	96.7634	98.5365	90.9935	706.713	473.977	162.223	142.055	154.028	168.616	135.519	218.258	334.134	266.08	151.323	125.171	115.596	102.571	103.671	112.189	126.46	137.215	141.361	115.198	112.713	104.373	85.7089	76.2344	74.4194
7313	0.5	0.1	7	250.858	287.751	498.835	767.273	875.615	1171.63	248.472	202.573	188.541	206.826	203.657	212.913	288.684	352.484	531.505	585.669	1404.85	909.39	239.895	197.481	172.463	180.411	190.415	205.193	211.05	355.73	1124.2	1685.18	1576.1	1109.29	312.698	209.752	196.118	211.569	311.25	434.395	514.659	445.596	1111.84	910.642	790.538	566.864	277.721	210.258	197.821	208.39
1287	4	8	0.7	671.585	650.11	608.283	382.967	527.378	380.735	334.058	292.136	253.504	328.8	307.069	294.56	299.82	240.661	289.888	302.684	304.537	1579.06	625.923	367.65	318.472	1370.5	780.959	682.196	378.589	696.585	435.055	510.311	1238.3	982.361	468.607	394.491	345.625	335.317	428.271	1207.07	545.921	1164.03	1268.27	573.096	946.534	489.835	382.837	335.978	305.261	289.003
1186	1	2	1.5	155.585	329.891	169.256	195.939	197.218	100.387	35.3982	24.0583	20.5939	24.3216	23.3547	21.9377	20.4103	19.5308	29.8526	25.0809	52.227	176.671	48.0822	37.4012	28.3339	37.3033	43.6772	36.0364	40.2278	103.989	52.0833	46.9368	44.279	35.5578	20.0047	13.3243	9.63504	14.5711	20.4432	355.752	83.2585	223.84	211.829	69.2395	57.245	45.9024	27.2651	19.9956	12.1495	13.4379
1042	1.5	0.5	0.1	22.3435	26.0617	30.4137	29.2584	24.4046	21.5486	21.2173	20.3434	18.9995	19.092	18.1375	18.9815	18.7411	19.4303	22.2596	20.9912	21.5418	24.1539	21.2938	19.438	18.1051	18.4487	19.5042	19.6826	25.0092	48.9428	39.131	22.9135	22.2485	22.7311	22.4704	20.8745	19.6177	19.7542	19.9838	194.575	125.312	68.811	35.9975	86.0846	102.439	28.3858	24.321	23.1056	21.5163	23.0818
884	3	0.2	0.1	2829.05	2482.05	2731.82	2718.14	2731.7	2716.78	2938.64	2024.03	2121.54	2135.09	2121.66	2135.27	2135.24	2094.68	2135.3	2122.48	2135.72	1931.46	2325.67	1909.82	1869.06	1882.07	1869.06	1881.88	2066.42	1658.41	1884.62	2065.34	1887.23	1880.88	1887.96	2308.25	2152.03	2358.81	2151.35	2358.24	2164.92	2123.7	2165.33	2349.95	2171.05	2154.93	2360.44	2389.53	2396.81	2410.68
1273	4	1	1.5	18.7884	30.7736	21.6786	18.6428	43.6802	27.7156	3.06353	0.975195	1.21115	5.60949	7.48633	69.6297	22.5703	25.7918	64.7947	38.3098	26.5378	63.5148	22.3081	12.8637	8.52393	78.3458	47.1678	33.7309	33.6071	56.4309	68.9432	54.5291	159.697	90.0142	52.3049	34.7659	24.1262	20.5444	18.2014	20.548	33.1809	49.5417	65.1428	41.2075	34.4206	23.2634	14.5476	10.4207	6.12759	7.71543
961	0.1	1.5	0.4	0	0	0	0	0	0	0	0	0	0	0	0	0	0	0	0	0	0	0	0	0	0	0	0	0	0	0	0	0	0	0	0	0	0	0	0	1.47811	1.61971	1.95682	49.3658	33.7286	20.1587	13.1892	9.67796	7.64157	7.02173
1144	5	8	1.5	1266.71	1602.1	1125.38	1087.51	1197.4	885.841	562.619	425.939	394.326	1434.36	860.104	1341.77	802.498	843.812	1036.92	789.069	916.878	1934.86	1025.64	741.457	594.887	1833.44	2174.58	1244.6	984.227	2444.23	1533.07	929.538	1829.08	3685.91	1479.68	1088.23	879.111	833.971	842.07	4375.89	1502.92	1788.1	2025.77	1351.98	1783.44	1179.53	1076.04	862.443	696.927	720.348
616	10	0.6	1	1778.02	4227.07	3207.32	2259.74	3603.71	4374.29	2091.06	1835.25	1745.71	1776.53	1748.31	1338.94	1780.18	1693.29	1777.01	1308.37	1779.78	1748.1	1335.67	1762.02	1701.96	1303.14	1706.21	1732.94	1302.79	1652.2	1732.15	1276.84	1733.08	1274.13	1732.15	1255.01	1185.19	1208.49	1183.13	1615.4	1209.75	1132	1209.84	1589.52	1209.32	1182.44	1207.7	1206.45	1179.4	1205.39
911	6	1	2	597.129	454.117	658.455	633.771	392.866	409.12	255.725	205.265	209.464	166.484	164.046	159.089	147.216	178.049	159.376	172.956	129.89	112.953	153.026	123.962	109.104	101.478	115.382	181.134	125.63	415.895	1586.72	903.655	1280.74	751.997	671.761	480.669	413.426	437.346	649.226	1163.63	661.258	1253.45	2285.26	2381.96	1291.91	1031.77	1012.78	609.534	462.108	493.523
1006	0.7	1.5	1	30.6703	51.2566	69.1414	64.9365	40.9475	32.0666	28.6536	25.131	21.8858	20.8961	21.0432	27.2508	22.8981	31.4798	41.3723	28.3231	43.7346	81.9902	71.2581	35.8938	28.9838	32.2472	89.5328	48.387	55.9174	115.353	68.5622	38.8498	32.8509	50.2488	35.1382	35.9346	62.0654	26.3555	26.6616	153.098	49.4628	43.447	37.8515	95.9564	123.472	48.6994	36.5918	30.9176	26.0011	62.6157
1048	10	1	0.6	399.597	522.577	790.252	1747.88	1218.06	1182.49	744.207	618.303	543.285	457.649	352.53	348.036	329.038	290.859	331.971	302.149	260.467	273.809	244.133	215.917	197.78	195.159	275.931	379.223	289.991	604.488	717.517	556.983	578.506	1477.95	796.626	630.849	542.402	380.692	303.019	349.481	306.572	482.374	552.697	1141.45	758.629	770.226	721.835	651.7	586.786	609.246
1123	1	0.1	0.1	56.5038	61.0823	61.1478	53.3692	46.0135	16.1174	4.93922	4.78502	9.92484	69.5876	54.4393	61.2695	52.6914	45.8163	45.4435	30.4661	46.375	70.1629	58.6626	26.1343	10.4712	18.7134	20.6352	27.6538	35.7901	73.897	66.9628	54.7961	68.2765	77.2702	59.3787	54.3111	50.0101	49.3848	37.9408	86.7903	70.5934	54.031	65.8386	59.5503	74.3211	64.2127	56.6594	53.6452	49.5745	49.2363
1032	4	1.5	0.7	112.677	152.715	234.075	370.342	203.22	156.852	137.771	121.315	107.107	101.182	90.0551	86.8642	80.0629	69.1761	84.6316	83.353	89.6333	129.367	114.936	88.7135	75.9484	72.1245	158.063	158.149	121.865	198.841	185.361	147.642	275.528	662.529	228.624	168.214	145.511	134.743	118.811	134.31	201.113	409.529	321.109	675.931	468.603	261.19	196.546	160.735	139.584	243.823
1774	1.5	1.5	0.8	449.805	539.102	871.193	773.225	319.299	221.342	191.825	173.934	154.751	148.381	134.307	132.313	127.405	161.806	310.811	411.769	245.62	362.912	194.755	155.394	133.145	123.938	111.105	114.677	320.48	856.905	892.486	521.195	233.412	189.458	180.905	165.538	179.583	162.914	174.165	508.45	524.68	698.478	566.635	650.204	519.567	290.418	203.982	178.642	156.301	147.874
1781	7	3	0.9	427.232	680.38	1821.72	1034.36	536.883	344.171	233.54	174	130.271	110.904	80.6849	98.0404	125.913	414.14	649.855	753.22	328.528	305.872	214.818	145.066	108.909	88.8832	46.2003	67.1156	495.385	1663.29	1167.02	561.924	398.884	287.594	218.559	212.583	162.455	119.703	151.214	535.686	690.904	1482.47	1525.46	1393.88	698.68	417.624	268.08	197.932	151.295	126.985
355	8	0.3	0.5	118.14	108.125	224.745	639.101	696.812	189.301	54.6306	42.4771	38.1547	38.5387	53.5523	67.9171	120.611	215.97	239.574	515.039	1095.31	248.139	57.0572	45.522	40.0651	39.5552	38.5361	56.5142	61.069	54.9828	230.995	398.827	574.022	346.206	61.4651	45.1448	40.2889	40.7816	57.023	190.111	259.683	311.69	356.812	922.695	1495.65	452.547	70.4301	49.772	50.9384	117.752
1101	3	5	1.5	214.906	115.111	387.283	460.948	91.8836	50.933	25.9687	16.6334	11.9921	14.8557	48.2049	162.776	79.8309	164.312	119.455	130.047	62.4476	72.9498	46.2743	26.1189	16.8722	16.0697	14.6043	21.1008	90.7903	257.027	140.832	211.321	84.5413	42.8927	27.6228	21.1725	13.8416	17.3394	24.4259	569.846	635.133	214.523	120.934	349.177	308.84	200.923	40.3476	21.7825	17.1045	14.8605
1023	2	10	0.6	283.676	579.973	806.667	1233.06	787.36	875.859	246.521	233.698	208.91	200.001	184.711	184.204	178.917	105.567	175.566	170.778	174.938	182.995	174.38	95.5236	83.0719	60.6368	79.3335	89.7407	80.49	144.705	119.321	153.174	89.9988	221.299	113.868	94.0964	79.0397	68.2595	55.7286	52.5778	53.9401	59.187	91.8489	1073.4	290.595	386.384	231.737	222.186	196.206	187.138
1060	0.8	1.5	0.7	37.4548	40.6863	56.145	61.6369	33.6641	29.9695	27.9458	24.8493	21.933	21.2775	20.0411	43.7033	31.4554	35.5249	51.8046	36.7897	45.9394	56.1638	37.6716	35.2492	31.8195	31.1284	71.946	45.2962	48.2577	185.167	58.4722	34.8387	31.4135	41.6171	42.0481	30.0538	26.7231	25.4568	27.493	312.033	68.6662	92.0184	44.0254	45.8223	175.984	51.0547	36.4918	32.0805	28.6962	28.0606
1864	1	1.5	0.9	151.936	176.876	339.939	424.488	247.073	159.522	106.785	62.1491	50.6049	53.772	59.7166	104.569	94.0302	96.7639	124.518	107.977	81.1787	63.6093	53.7227	42.2057	34.2491	30.9912	27.4223	27.8762	78.0959	159.068	157.557	161.748	184.066	79.4097	61.0183	56.7368	73.787	78.6614	94.0081	531.914	499.346	324	313.171	331.281	303.965	186.964	183.101	151.173	120.667	100.443
1797	8	3	0.5	3775.6	2678.57	5732.89	2654.51	1691.32	1334.01	1059.37	996.18	935.308	928.808	893.971	946.862	1082.53	2967.87	2151.71	2410.17	933.958	1274.86	574.4	488.157	442.493	424.857	391.34	664.021	3288.75	4322.95	3200.81	1465.04	1248.43	1170.34	1038.11	1120.05	971.217	961.055	1301.96	3637.9	2263.38	3625.24	3080.57	3324.15	2349.34	1416.99	1058.2	962.258	791.603	783.028
305	0.9	8	0.6	1678.84	1239.06	1785.46	1948.65	3577.05	3649.87	1958.81	1237.68	1164.42	1669.86	1810.83	2428.78	1772.13	2257.24	1673.16	2017.56	2734.1	3581.94	1441.42	821.818	1019.05	1575.79	1674.42	2111.82	1335.87	3353.37	2737.88	2988.33	3094.91	2540.54	1875	1264.6	1064.78	2226.34	1453.57	1948.43	2618.17	1933.53	1725.92	1996.77	1957.61	1476.71	2521.45	1028.12	1578.17	1256.6
968	5	2	0.3	42.5296	46.3624	96.4929	411.11	378.576	112.732	58.4804	58.7786	58.9163	63.7755	63.8222	63.5113	59.4809	53.7689	62.4428	58.3397	127.071	74.9734	50.946	57.2817	52.7112	56.1334	59.5701	56.7443	56.2046	60.3858	84.7076	59.8463	133.51	101.562	67.0329	45.5018	40.3065	38.9289	34.5527	36.0981	35.767	41.9341	68.266	185.384	85.0385	162.426	66.7151	54.213	56.9825	70.7433
1019	9	3	9	7.23133	19.4733	67.5735	46.246	14.8867	8.37227	6.52664	5.13323	4.19193	3.89993	3.58301	3.68286	3.6869	7.56934	20.5282	11.5316	17.8823	64.2999	17.4048	11.168	8.04978	6.26392	5.2894	4.86342	26.3768	165.467	91.1534	27.2955	11.8919	8.0142	6.30517	4.79586	4.1962	4.15575	3.95696	208.247	105.815	32.3673	28.0549	69.1976	99.7165	17.6546	8.47325	5.98489	4.5669	4.18658
1302	5	1.5	0.8	21.1024	15.5852	16.5932	15.3461	15.0054	13.923	12.0977	12.9434	17.8869	25.7801	24.1	38.7927	35.881	32.6668	68.8912	48.8343	37.3472	149.821	120.528	37.6854	21.189	26.1865	23.7256	21.3071	18.1722	16.6222	18.4419	15.9462	16.4993	15.8833	13.8086	14.7918	14.3972	15.1052	14.7339	16.566	19.1865	22.8521	40.6667	38.1637	16.9813	16.3042	16.242	16.2712	15.3368	16.031
1824	9	0.7	0.1	8169.82	7154.45	16773.9	8924.23	4760.07	2767.31	2216.44	1794.19	1572.9	1858.28	1557.98	2106.11	1987.3	6775.87	4614.14	4940.17	2283.71	2069.31	1393.19	1050.46	819.435	739.652	671.944	1781.19	11696.2	9973.17	6949.08	5149.91	2614.6	2217.95	1888.94	1794.81	1578.71	1411.83	1429.71	11540.7	6338.66	8559.27	6529.52	9940.69	7820.41	3406.86	2265	1803.04	1450.29	1381.65
1316	6	0.1	0.5	0	0	0	0	0	0	0	0	0	0	0	0	0.425832	0.616664	1.10415	1.5252	9.8434	30.2006	35.9256	7.26691	5.53155	6.03015	10.3824	5.7806	4.0703	2.88071	3.50041	2.00472	1.54974	1.73937	2.04097	1.7889	1.36992	0.638764	0.11869	0.115349	0.118818	0.121122	0.1481	0.149029	0.185089	0.172756	0.14937	0.10406	0.0904384	0.0919575
1835	9	0.7	0.1	7265.44	6126.47	13818.7	7197.72	4089.37	2376.86	1959.13	1592.41	1451.78	1556.52	1303.23	1644.19	1671.77	6249.44	3583.53	4470.79	1863.5	1816.58	1188.83	885.925	729.181	626.314	571.04	1646.55	9616.28	9112.73	5702.62	3895.28	2288.34	1929.62	1731.77	1645.52	1415.17	1317.42	1338.31	8650.68	5037.27	6908.16	5768.14	7311.91	6145.11	2793.79	2088.61	1574.84	1276.89	1180.08
1847	0.3	0.1	0.1	5992.68	5016.29	11593.6	5294.08	3059.36	1985.65	1595.41	1364.69	1224.42	1157.5	1166.16	1362.74	1478.36	4957.97	3340.7	3607.68	1639.23	1724.88	966.157	863.669	762.271	652.163	504.851	969.477	6814.29	7690.65	5611.55	2642.24	1969.53	1603.81	1416.21	1363.01	1214.76	1154.89	1362.8	6692.84	3926.25	5807.54	4481.01	5836.22	4267.25	2350.15	1602.34	1310.58	1115.47	1035.01
1231	4	8	0.8	53.3593	84.4791	62.4499	49.2491	48.4791	41.9014	35.9708	30.6889	26.283	25.5704	24.0573	24.8116	24.2804	21.4663	23.7678	23.5144	27.9611	171.509	82.6545	43.9006	34.9243	35.4453	54.9449	57.4772	47.5295	46.9791	53.1604	44.9895	44.5472	43.1791	40.232	34.4626	28.9726	27.3995	26.5843	244.616	74.3271	121.518	98.784	61.056	51.1015	48.3163	44.135	38.0972	32.9956	31.0133
1140	6	8	1	1.96551	1.78945	1.80437	1.56618	1.68856	1.83477	1.89902	1.87048	1.67199	1.96986	1.59177	2.78607	1.96044	1.55098	2.13436	1.68864	1.5907	1.63724	1.78287	1.74368	1.55237	1.52952	1.48493	1.50455	1.49864	1.3502	1.48754	1.43755	2.26269	4.68616	6.08403	1.66018	1.49645	1.46695	1.41229	1.47901	2.53586	12.7688	5.22745	2.36403	1.57347	1.50617	1.60282	1.59598	1.45543	71.7207
1296	0.9	10	3	55.3242	90.7124	58.1567	47.3753	48.5547	48.1655	32.2046	25.7075	21.9433	19.7201	6.13861	3.59675	5.6603	9.8597	8.64829	6.82206	8.17764	68.1207	8.23765	5.62003	7.69449	9.68843	54.5353	10.0463	11.3726	11.0345	12.597	12.9265	46.9289	9.14533	7.3021	6.35348	6.13785	6.84314	7.77415	44.3274	25.1692	71.68	64.2291	21.2624	68.9368	12.4933	10.0796	9.72926	7.87594	6.99999
1659	0.9	10	1	16.1274	23.6773	62.718	49.1757	30.5148	23.6019	20.1741	17.6766	15.3347	13.9107	12.3266	13.3428	14.24	33.499	34.2433	28.3006	49.8905	41.7279	24.3845	22.2571	50.5493	25.6077	21.0437	20.6158	28.7216	70.0438	190.873	66.4958	37.486	28.8093	24.8973	20.7853	17.2823	15.7498	17.5278	63.5374	44.5522	37.2753	42.0233	60.4011	55.7053	42.8884	31.691	24.8237	20.439	23.8841
1277	3	1.5	0.7	4.96638	4.29811	4.44971	4.24274	11.3434	7.52389	4.16655	3.85085	3.5462	3.77497	3.47679	7.19991	6.02473	6.39618	9.15916	9.92593	6.87863	26.1444	19.9109	5.56935	4.83361	4.51742	4.0838	3.97698	3.77251	3.77537	4.53708	4.48885	6.52956	6.01047	4.52216	4.07033	3.65356	3.55687	3.3003	3.74022	4.94768	7.2538	9.67329	8.96328	6.12823	5.32175	4.70082	4.23529	3.76111	3.64418
1021	2	1.5	8	92.0834	242.826	183.147	247.134	93.4771	64.1569	48.7564	34.08	23.8686	17.7858	13.1735	11.1786	9.44873	7.19426	7.05393	5.99017	5.98649	9.78406	7.33053	5.57208	4.41214	5.76594	137.04	56.9102	36.0274	231.559	106.642	60.8705	167.706	139.336	91.0163	54.7314	36.3057	28.0248	20.9846	17.5462	14.5064	47.4883	482.513	294.25	89.3231	97.6576	72.223	43.6803	30.4891	24.8531
1280	1	0.1	3	81.7557	69.4715	73.0456	66.6005	57.8749	6.39222	5.83746	5.4793	87.6282	117.616	80.0564	145.017	124.271	82.9668	150.032	80.2838	82.8118	79.6425	79.9627	76.5361	71.9071	81.4138	89.8322	76.4944	46.3632	33.2183	24.953	17.5275	28.7223	18.0823	16.6783	7.01589	6.62543	6.81396	6.578	6.81202	12.9302	27.8126	31.2009	13.7144	6.98552	6.69657	6.69227	6.42148	5.95672	6.13725
1120	6	8	1	6.17148	6.56416	7.73468	7.75018	7.87692	7.71861	7.4611	6.46662	5.44305	5.09572	4.63852	4.65287	4.47775	3.82547	4.05478	3.74148	3.70422	3.47425	3.4426	3.25963	3.08225	3.12951	3.15349	3.39331	3.5471	3.45449	4.57291	5.4246	15.9021	41.4293	24.0459	18.4113	13.5967	11.5592	9.76571	9.44009	8.59635	7.42591	9.7844	11.0619	10.5272	9.74394	8.99386	7.50424	6.14583	26.5088
182	0.4	0.7	0.2	516.321	604.83	209.292	135.553	64.077	50.4969	50.2907	48.5338	45.4956	45.6011	42.8911	43.3421	42.3366	44.4496	73.5601	105.866	53.7462	49.5587	45.4032	41.1272	65.3027	63.0645	62.6868	316.57	294.261	476.253	408.012	488.086	159.073	79.7952	55.3637	51.6414	49.1933	50.3394	330.11	451.801	401.98	511.778	695.356	290.288	149.093	80.6692	52.7394	51.6326	49.418	50.484
7311	3	1	1.5	14.3967	29.7561	50.0381	49.3939	17.9946	13.3439	10.3062	9.24988	6.84945	6.33122	4.88568	4.81989	3.85222	3.15282	3.73589	3.53318	5.48876	15.9882	15.2084	11.7142	8.59986	8.25745	19.3788	24.1923	15.7854	46.3656	25.7962	15.212	45.3972	100.363	22.6353	19.0986	14.8686	13.2206	11.5147	12.2992	15.9873	52.5146	45.2242	103.82	34.854	25.2562	16.0045	13.2561	12.2674	10.7572
1755	0.8	1.5	0.3	87.0173	76.1329	172.219	110.372	38.8863	24.0221	18.0287	11.7498	10.5564	10.2484	9.55792	12.7576	25.7064	143.05	80.7501	65.586	41.4835	170.717	22.004	16.0687	14.4854	13.7656	20.2402	97.7574	195.526	187.827	90.2417	74.095	48.2644	25.5522	19.8591	19.806	93.5834	12.1804	13.7106	115.016	119.178	107.895	42.9146	134.732	233.578	207.206	39.3763	21.5363	15.6367	19.6216
1152	0.1	2	1	0	0	0	0	0	0	0	0	0	0	0	0	0	0	0	0	0	0	0	0	0	0	0	0	0	0	0	0	0	0	0	0	0	0	0	0	0	0	0	0	0	0	0	0	0	0
1192	7	6	1.5	258.146	323.595	248.362	264.01	274.368	193.904	136.775	122.611	109.15	116.141	110.149	118.785	114.739	115.705	135.415	124.087	124.696	237.928	148.42	109.521	90.678	101.929	105.69	113.621	126.557	184.474	162.564	124.823	121.951	96.3314	78.9332	73.0109	60.1044	68.5292	79.305	254.869	382.035	367.689	252.216	179.146	163.147	137.788	112.43	95.3623	84.3334	83.7516
541	9	9	0.3	21.7609	39.3166	20.452	40.2003	1591.64	198.454	82.3288	29.0366	50.9084	47.9766	22.9135	44.0267	21.194	18.3076	19.6014	289.294	422.21	51.002	23.6601	20.2212	17.5701	17.4071	17.0266	17.1338	17.011	15.1857	16.3333	52.1294	1068.84	244.486	41.306	25.7519	24.2664	46.1521	21.6652	41.4787	20.0133	17.3668	18.6598	18.1107	1077.91	355.135	48.3164	25.8204	22.2421	21.0923
1822	10	0.8	0.3	4867.88	4291.94	8860.21	4206.96	2669.03	1550.29	1418.43	1201.32	1099.35	1024.72	1042.33	1224.4	1292.27	4546.08	2412.12	3031.41	1594.34	1524.96	803.612	654.311	540.648	490.683	447.599	1047.77	5494.03	6373.71	4770.4	2011.94	1685.93	1432.41	1288.98	1269.79	1123.67	1093.8	1245.01	5662.74	3620.41	4428.71	3962.07	5128.01	3450.87	1602.87	1385.98	1150.11	987.937	935.601
972	8	1.5	0.4	72.9719	131.552	291.752	822.236	134.451	100.503	74.7122	52.1139	29.1096	22.0346	13.9478	12.2268	11.5183	9.89252	10.5613	10.2192	43.6661	65.7056	31.0572	19.3053	12.3499	10.8147	9.77321	10.3544	10.3326	14.1561	53.5561	44.2441	39.589	39.3332	35.2177	23.269	12.9681	11.5577	10.1985	10.0029	9.7131	10.1427	31.7066	208.283	144.958	90.0973	71.7966	27.8154	15.2167	11.4994
613	1.5	1.5	1.5	115.038	215.149	352.735	616.091	808.096	797.378	311.11	209.4	158.293	153.01	207.165	168.298	108.133	93.1418	179.186	388.181	309.901	103.128	31.6864	23.4668	24.0231	26.0601	26.2038	25.9503	39.5505	67.4448	284.624	326.471	685.346	248	28.7941	24.4803	21.9139	23.6041	50.1761	75.6212	70.7564	107.731	428.618	429.877	685.021	576.858	48.6273	36.8136	28.3607	33.8947
1086	10	5	6	0.710476	0.799658	0.921646	0.744832	0.500676	0.182135	0.184779	0.18222	0.174461	0.213453	0.423209	0.609756	0.57787	0.514139	0.667346	0.632849	0.390759	0.160068	0.163431	0.162126	0.155153	0.324156	0.522547	0.5719	0.582996	0.56304	0.748185	0.600456	0.368333	0.143659	0.146258	0.144758	0.13873	0.215853	0.423752	0.663996	0.975311	4.92532	7.91709	7.35788	1.57455	0.175011	0.177922	0.175642	0.167181	0.325973
1295	9	0.5	0.1	20.4242	70.9784	33.0355	31.4126	30.2859	18.1828	16.9054	15.8438	14.6538	14.8568	14.2734	15.7766	16.3165	17.3682	17.6768	15.8551	17.2601	50.1874	35.3224	17.5144	16.1851	16.3451	81.3099	21.2236	40.7304	29.2373	31.7142	83.88	78.7662	22.2182	18.7572	17.5454	15.9957	16.2709	110.036	140.654	67.9785	150.307	121.129	26.1614	98.821	25.5616	18.3451	17.8424	17.0901	17.175
1139	10	10	1	10.532	7.16218	7.66975	5.6643	5.26839	4.97053	4.02416	3.56229	5.88231	33.4348	14.8669	29.615	12.5946	9.2944	33.6172	13.5755	11.8462	12.9957	9.24924	7.18075	6.01746	44.3386	41.2389	13.691	10.54	15.0811	16.4946	12.1754	31.9061	65.3494	39.8075	15.5048	12.1655	10.5135	8.70876	11.6554	17.3829	17.0735	16.2781	14.0979	11.4672	9.90788	8.26769	6.91974	5.87019	8.60483
1862	2	4	0.5	863.367	432.37	1319.56	930.969	304.357	160.18	102.451	88.2667	76.3801	80.3704	120.061	131.85	94.6127	765.056	286.178	301.179	91.6565	156.803	83.7422	70.0614	59.2491	52.5306	44.5308	47.1327	1007.8	1143.21	393.184	419.528	173.342	93.596	84.7734	80.6361	71.1176	70.7857	113.212	1047.9	454.05	727.729	628.086	677.14	214.192	161.163	98.9826	87.2123	77.3315	73.6479
629	6	1.5	0.3	1918.29	4522.71	3914.92	2038.67	3215.97	4753.57	2172.59	1753.7	1636.14	1774.9	1700.27	1779.69	1713.15	1601.11	1725.83	1635.43	1640.66	1622.34	1635.46	1609.45	1557.25	1628.85	1556.85	1634.39	1638.89	1492.26	1645.1	1500.35	1505.17	1487.16	1558.67	1447.9	1271.38	1355.47	1290.42	1523.19	1349.68	1303.7	1532.74	1255.07	1247.68	1226.98	1290.65	1570.57	1371.26	1449.63
1000	6	2	0.7	20.0497	43.3837	47.7191	48.9529	24.3165	19.0542	17.5011	15.6763	13.8102	13.6566	16.8361	28.9548	19.9396	24.8992	31.7862	18.9345	75.1817	123.714	41.1912	22.0075	18.4818	17.9981	34.9246	54.5212	39.1687	138.494	40.5002	24.6191	20.1276	40.1121	22.0407	18.5233	19.9053	16.345	15.858	181.965	29.943	23.4425	20.9127	155.967	60.9609	23.4947	19.8335	17.4828	15.259	65.0444
7306	0.2	0.1	0.1	7468.62	6265.24	15257.2	6849.31	4269.38	2533.15	2004.22	1687.77	1468.51	1600.79	1444.67	1655.31	1898.4	6056.41	4123.5	4318.09	2017.29	1959.7	1177.76	971.198	773.539	736.948	659.499	1721.76	9610.26	9057.67	6788.11	3712.43	2556.38	1988.53	1761.15	1674.96	1470.24	1361.23	1442.19	8966.14	5296.09	7307.26	5792.33	8015.88	6595.45	3005.97	2021.39	1623.92	1344.17	1224.39
991	0.8	1.5	1.5	72.4061	116.25	183.223	185.913	71.0477	49.619	34.6987	25.8892	18.173	17.7288	10.9996	21.1466	9.36666	11.2606	24.7528	13.2155	39.3928	72.1698	42.668	53.9072	35.1007	38.1835	161.654	109.75	80.0281	136.541	114.099	60.8901	90.0412	196.388	72.8793	55.2458	37.6213	29.9262	22.7327	20.2916	15.5197	44.9844	62.0267	377.027	134.919	99.5883	64.6661	43.0646	30.6809	31.0185
7317	0.9	8	0.5	114.536	150.31	423.16	86.9781	34.4083	31.6133	25.9136	23.8613	21.2425	20.5012	18.6598	18.8147	19.195	84.0393	62.7981	31.7811	41.3065	24.4199	23.5646	21.6261	19.5397	18.7987	17.4576	24.0612	369.964	142.363	86.2367	61.2631	31.3458	26.1147	24.9298	23.7434	22.8165	22.4482	33.5739	310.573	65.1423	188.181	42.3168	228.207	244.851	63.1204	28.9823	25.9758	23.2602	22.5094
998	8	0.4	1.5	193.686	176.862	121.78	540.168	768.532	383.275	81.3367	63.5278	59.8818	94.4037	123.839	155.019	117.818	78.49	183.304	85.541	50.3811	45.7775	60.01	38.4289	8.65466	39.5124	42.2513	40.2089	34.9075	36.3154	52.7043	29.6246	12.0499	20.7413	73.7666	81.8844	89.0945	99.3752	95.3432	96.9071	89.4344	53.9928	161.294	306.871	167.617	129.975	112.441	110.738	107.989	125.665
1716	6	1.5	0.7	47.8188	53.4912	147.597	125.822	49.9861	40.7661	36.8334	32.3998	27.7535	26.2101	24.2144	32.2286	33.1051	61.3452	56.8206	37.5892	111.691	151.701	44.2211	37.9568	33.2712	30.6862	28.031	30.4141	124.865	266.024	242.9	71.5251	47.5816	46.1044	40.9327	35.6652	31.1629	30.5301	27.9314	361.509	235.99	126.76	94.0226	178.99	348.962	191.878	50.9458	41.4691	36.8413	96.6929
1896	8	0.9	0.5	458.891	442.161	1208.93	666.967	281.142	299.725	269.275	242.33	222.568	254.194	223.306	206.934	177.419	442.319	459.295	281.325	245.34	236.029	185.515	169.279	131.825	137.643	116.999	164.685	377.128	737.984	365.351	522.547	344.994	250.445	245.789	240.319	160.675	194.384	163.417	372.566	566.577	375.612	588.122	447.602	370.859	264.924	249.381	234.776	230.36	201.948
1883	0.8	2	10	280.348	239.056	451.221	172.327	68.0763	66.3297	44.2958	30.5192	21.1729	21.4194	19.0838	31.8011	36.5428	331.335	83.2605	51.104	32.2219	25.4697	19.4284	15.694	11.4968	8.91294	7.73933	10.5737	382.979	320.98	128.066	69.1602	111.303	50.959	36.2241	28.4991	20.2636	16.8854	14.0117	101.547	252.694	283.611	258.327	291.61	76.6366	55.3294	42.8015	32.8064	25.3676	19.0679
1285	2	1.5	1.5	12.2931	7.31197	9.62561	11.901	35.1398	31.2721	10.5018	8.85999	7.17549	6.39829	5.5157	19.8736	15.1816	19.6178	25.4965	11.4554	9.79301	106.845	28.4748	7.22328	7.37379	7.38762	7.61928	6.18888	5.14345	5.05616	4.8265	5.42788	17.214	7.55583	4.82824	3.80896	3.315	2.94733	3.09021	5.09295	8.51702	43.6405	44.3939	13.8258	14.5007	9.08484	6.1568	5.59749	4.22992	3.78285
1266	0.8	1.5	0.6	20.0356	27.7995	28.4711	25.2858	29.296	14.0502	9.24608	8.53378	7.5337	7.1654	6.46948	6.33296	6.00957	5.25715	5.93063	6.03141	6.31177	6.36817	7.57032	7.59766	6.95712	6.81479	6.61721	7.01154	6.9961	6.44271	7.44427	7.42407	8.89894	9.07018	8.51622	7.74128	6.77185	6.4319	5.8845	15.611	15.3681	50.2088	70.3679	31.6136	31.1916	31.468	9.53568	10.1138	8.02852	7.67225
1176	3	0.6	0.1	107.132	53.5144	15.4823	14.3704	15.0528	17.0839	20.4692	21.7848	30.6587	160.503	112.868	141.92	113.592	81.3461	49.9533	22.7234	20.473	27.7132	30.5357	21.5733	18.5756	50.3213	22.4483	18.0543	17.4005	17.5237	19.0872	16.9889	82.7906	133.523	113.754	47.9037	32.4861	20.6979	17.8405	17.5144	21.1745	81.6467	26.1324	22.24	19.092	28.3899	34.0624	28.6256	19.7354	62.8072
924	2	1	0.6	31.448	17.0558	35.0688	39.4912	20.4224	27.9482	17.0772	11.9575	22.2238	14.4821	17.4337	38.9151	37.1699	29.9857	43.5816	29.286	28.322	24.104	48.921	60.3197	23.1361	21.4462	21.5434	25.1741	20.409	32.017	81.1463	52.9388	41.7844	47.5674	43.057	41.6872	32.6902	31.9345	35.4278	69.2041	36.8495	58.0878	61.6929	107.249	38.8567	30.6541	28.4748	26.0157	23.7121	23.5723
758	1	1	1.5	110.834	110.079	92.1339	71.9607	71.1544	64.9836	63.7972	79.7005	75.1068	68.6535	64.2266	65.8585	61.1963	60.4654	63.9255	74.1035	68.547	54.7836	56.6532	48.0236	53.3221	62.6807	61.2362	53.5395	58.0817	47.5212	63.0937	57.3083	68.6743	66.7293	95.3381	63.4133	68.1186	96.0851	82.491	73.5194	83.492	63.5077	75.0002	63.3842	67.3644	73.0835	80.0362	62.2446	62.3776	73.2668
1257	0.1	10	0.2	0	0	0	0	0	0	0	0	0	0	0	0	0	0	0	0	0	0	0	0	0	0	0	0	0	0	0	0	0	0	0	0	0	0	0	0	0	0	0	0	0	0	0	0	0	0
895	0.6	0.6	0.1	2938.84	2670.25	3020.29	3132.23	3056.37	2886.13	2874.98	2410.18	2212.44	2297.28	2226.46	2300.92	2296.46	2072.56	2289.82	2214.07	2277.24	2182.82	2248.27	2035.09	1920.72	1993.09	1933.46	2002.87	2004.25	1935.5	2098.38	2191.19	2280.55	2338.39	2226.12	2359.38	2330.08	2467.08	2434.38	2481.86	2528.67	2288.87	2742.83	3249.68	3452.83	2894.4	2818.17	2783.32	2640.81	2691.04
1317	0.9	9	0.1	2.52894	1.70239	1.86833	1.80626	47.3215	4.89532	2.05023	230.62	29.3445	13.2698	10.3545	28.0936	11.5767	8.89421	2.19639	2.03749	24.1693	89.1627	24.8208	21.8444	11.2874	54.1041	18.5389	10.5637	9.63363	16.666	10.2146	2.38894	9.29777	2.2726	2.27273	2.18074	2.01205	2.08039	2.06356	2.1874	2.12694	7.48241	1.9539	1.85309	1.82035	1.70369	1.88536	1.99396	1.77096	1.8614
1242	3	2	0.8	24.3215	10.668	11.5565	9.1611	7.44178	6.41327	5.16301	1.52564	31.4523	426.329	44.0157	37.6287	37.3423	31.5645	31.4574	26.9527	23.801	12.3695	9.16154	15.3124	30.0298	26.2296	14.6584	14.3637	13.7689	14.0539	11.5793	8.59659	5.97605	4.57711	0.470617	0.331592	0.301036	0.298107	0.2881	5.06849	66.4445	87.8897	48.7029	22.7414	19.2475	6.34772	4.33409	0.449505	0.241767	2.66468
107	0.6	1	0.8	62.9453	40.6445	49.2293	60.8077	39.0531	37.0843	36.1726	32.0577	40.4053	43.0612	37.8324	51.6484	60.9399	70.5661	76.0342	59.958	47.6248	40.6595	36.387	28.2655	22.0324	20.5725	27.1891	97.6768	116.406	237.037	136.606	87.3384	39.5106	37.6302	37.8157	35.0339	31.4294	30.7582	28.4917	45.1678	145.852	285.033	216.283	63.0992	51.3856	37.6856	38.03	35.7419	32.5221	31.964
1841	3	0.3	0.1	164.077	166.714	309.574	253.082	118.715	36.6626	27.7533	21.5435	15.5409	15.7245	14.8974	15.7614	15.4926	164.731	65.4651	75.9572	21.8961	31.4745	15.8926	15.2528	14.3376	14.2669	13.458	15.0057	214.695	223.081	247.232	76.2241	36.1855	21.4836	16.2645	15.9382	14.9239	14.9536	25.2363	255.529	85.8306	138.759	85.7513	126.415	102.728	46.003	28.0504	16.6648	20.2466	15.5089
907	2	1.5	3	273.304	213.362	289.442	252.972	142.548	133.937	74.1051	70.7359	91.9001	94.0228	68.7096	71.9709	66.0978	77.4041	87.7151	103.937	79.0507	69.2069	65.2924	66.2701	67.6475	66.0025	76.3996	70.3871	64.2573	144.151	528.761	395.035	388.986	371.121	268.228	174.468	128.881	124.276	214.73	406.288	266.605	461.915	653.946	858.648	516.125	313.981	269.389	177.079	142.939	206.077
80	0.6	1.5	0.2	326.638	254.656	316.079	217.749	117.039	111.586	102.718	147.363	92.2735	17.9266	167.225	269.945	226.035	182.322	126.243	231.208	123.374	189.966	107.991	123.71	147.239	100.731	170.643	302.088	327.772	559.628	352.711	341.4	130.193	111.129	107.115	124.9	164.911	108.438	199.38	299.847	332.243	527.981	469.966	172.074	174.065	112.894	117.105	102.749	120.993	144.859
1236	0.2	0.9	1	6.64965	4.93097	5.56606	5.30973	5.37684	5.55956	5.38825	4.37544	3.49967	3.43005	3.18791	4.53892	7.0491	6.27687	7.85309	9.73116	9.62266	8.5384	8.08743	6.50231	5.07243	19.5407	20.9191	11.9561	10.9047	9.8252	11.7947	11.5134	11.0197	13.5685	18.8082	12.1932	7.01538	6.67339	5.56011	4.85123	4.61266	5.19319	7.33573	8.95806	8.07485	5.71393	4.1608	3.42028	2.48686	2.33929
981	9	7	1	107.497	108.818	168.853	676.019	168.962	120.602	114.369	109.729	103.611	104.545	99.7663	101.981	101.06	90.6368	99.7868	96.0628	98.7779	99.2335	49.5989	22.7452	17.5583	12.542	13.0331	15.2813	16.2553	22.1661	38.7037	24.5237	21.3976	24.5779	36.029	43.0386	36.0198	36.2796	34.3149	35.1452	34.873	39.3366	53.6818	81.2559	59.5263	50.3163	59.5197	68.5179	64.2863	65.1441
1093	1.5	1.5	1	22.9167	23.4787	35.6732	33.5165	33.3255	30.2469	16.9595	9.78161	7.82394	14.1189	14.4864	22.7686	26.5821	33.8191	55.7576	39.9549	46.7309	86.0749	53.1027	36.2928	28.1231	21.6334	23.5685	23.6481	29.3082	144.58	95.3741	50.2178	48.6432	90.3486	56.9127	40.7264	32.1913	27.9572	24.5644	83.4938	93.0299	51.5213	64.1317	50.0619	151.056	77.2065	43.1896	35.3602	27.2977	24.0529
1709	4	7	0.9	59.6235	73.0473	177.161	120.791	71.1033	50.5646	42.3833	37.977	31.3402	25.9262	22.575	26.1657	25.8263	48.3903	74.1729	67.5584	63.7692	153.423	57.2525	37.806	29.517	28.3188	29.7933	39.708	67.4032	190.667	170.066	87.8701	45.8232	56.4755	53.5201	40.3403	30.1381	25.2955	25.4485	42.9209	44.3911	62.0416	78.3058	125.579	137.934	69.872	45.3939	36.4136	27.0188	23.8417
1017	1	1.5	1.5	24.679	45.7173	121.127	37.4762	18.443	10.1352	8.19426	5.90945	5.04466	3.68972	3.33707	2.812	3.24637	20.7112	18.7409	9.7059	30.8093	70.7382	19.1396	10.2956	6.21184	5.70767	5.87251	10.1178	50.9423	207.395	181.061	52.1268	20.986	14.7701	10.7225	15.9107	44.4134	24.1041	29.2074	249.155	142.15	76.622	80.559	117.871	154.206	71.9525	52.5809	42.9546	33.935	28.927
1194	0.9	0.9	1.5	20.2099	20.235	25.3183	21.9711	20.2252	17.561	15.1339	12.3833	9.98848	14.4798	16.5493	14.8416	10.9615	8.72345	11.5359	10.7419	10.7133	9.08223	6.68591	5.9757	5.14865	77.8622	96.2011	25.5866	20.9192	30.6681	24.6599	19.769	66.2923	64.745	28.6346	20.4071	15.0034	12.8322	11.1837	9.7634	8.68937	8.73347	10.3611	9.57623	10.2039	8.63921	6.66232	5.33097	4.53426	3.98356
[truncated: 434 more columns]

## Sheet: Storage(WG inflow-No Demand)
grand_id	q1	q2	q3	1980-01	1980-02	1980-03	1980-04	1980-05	1980-06	1980-07	1980-08	1980-09	1980-10	1980-11	1980-12	1981-01	1981-02	1981-03	1981-04	1981-05	1981-06	1981-07	1981-08	1981-09	1981-10	1981-11	1981-12	1982-01	1982-02	1982-03	1982-04	1982-05	1982-06	1982-07	1982-08	1982-09	1982-10	1982-11	1982-12	1983-01	1983-02	1983-03	1983-04	1983-05	1983-06	1983-07	1983-08	1983-09	1983-10
610	0.7	0.9	0.1	36700	36700	36700	36700	36700	36700	36700	36700	36700	36700	36700	36700	36700	36700	36700	36700	36700	36700	36689.4	36561.3	36428	36320.5	36233.1	36156.9	36098.2	36326.8	36700	36697.9	36613.3	36433.8	36215.8	35963.3	35760.2	35588.7	35455.1	35543.7	35922.6	36495.9	36700	36700	36692.1	36572.5	36426.3	36641	36700	36700
753	1.5	0.9	0.9	20082.1	20327.8	20597.5	21017.7	21087.7	21079.2	20983.3	20532.6	20197.7	20023.1	19939.6	19860.6	19882.7	19869.7	19878.4	19960.6	20221.8	21138.5	20939.7	20515.9	20098.5	19846	19715.3	19560.9	19520.8	19484.6	19610.7	20767.6	21752.5	21957.8	21618	20965	20813.5	20969.2	21088.5	21085.6	21082	21082.1	21082.6	21079.4	21092.5	21441.4	20985.1	20587.8	20262.2	20182.7
870	1.5	0.9	0.7	20295.6	20293.6	20292.8	20290.7	20297.6	20293.2	20228	20136.5	20095.5	20141.6	20281	20298.3	20296.5	20293.1	20295.3	20287.9	20289.5	20265.3	20160.5	19898.7	19565.2	19350.2	19188.3	19084.3	18971.8	18836.5	18763.6	20013.7	20489.2	20287.6	20288.4	20287.8	20293.8	20290.6	20291.2	20291.6	20291.1	20294.2	20291.4	20288.8	20288.8	20286.2	20296.3	20292.1	20290.7	20290.9
597	0.5	0.9	0.2	24938.4	25070	25070	25070	25070	25070	25036.5	24691.5	24356.5	24321.4	24519.9	24725.4	24844.8	24779.3	24560.7	24514.8	25045.9	25057.7	24676.1	23875.9	23055.8	22394.1	22082.2	21935.3	21759.5	21573.6	21898.8	22840.2	24402.6	25070	24990.7	24494	24060.5	23951.4	24111.1	24422.9	24730.8	25035.2	25070	25070	25070	25070	25070	25027.7	24917.1	24984.6
307	0.5	0.6	0.2	17350.7	17200.7	17120.2	17221.2	17371.5	17454	17370.3	16898.5	16599.1	16454.3	16359.9	16269.1	16186.5	16098.9	16116.2	16409.7	17172.9	19200.1	19274.3	18907.9	18576.3	18458.5	18502.2	18561.3	18615.1	18675.5	19194.6	20580.3	22110.7	23489	23559.2	23482.5	23381.1	23427.8	23556.2	23560	23560	23560	23560	23560	23560	23529.3	23303.5	22850.8	22389.4	22218.4
1753	2	3	0.5	2758.45	2567.01	2391.84	2125.11	2627.5	2736.2	2818.37	2834.59	2854.7	2824.61	2857.84	2861.18	2789.76	2730.8	2627.88	2730.18	2768.35	2802.79	2851.79	2716.38	2563.41	2294.35	2069.16	2288.02	2705.94	2397.14	2513.33	2677.98	2753.82	2814.13	2808.51	2851.26	2812.68	2798.75	2826.18	2733.93	2512.13	2592.78	2603.16	2544.92	2655.03	2589.61	2781.68	2815.77	2892.78	2882.65
297	4	10	1	1431.17	1205.59	1161.11	1360.19	2498.37	2442.34	2013.63	1929.97	1923.29	1788.43	1738.67	1549.4	1601.19	1511.37	1440.85	1439.17	2142.1	2642.6	2612.06	2053.36	1811.34	1780.38	1589.51	1480.09	1293.42	1215.53	1181.86	1125.02	1621.49	2300.19	2320.5	1956.09	2001.26	1994.04	1776.15	1612.96	1496.85	1373.14	1376.29	1368.91	1727.56	2107.53	2238.27	1952.59	1831.59	1641.86
1036	8	1	0.8	2168.92	2302.18	2398.65	2527.78	2542.7	2501.41	2408.29	2322.98	2245.72	2184.28	2133.55	2111.42	2055.94	2053.12	2028.28	1983.92	1970.04	1965.8	1916.79	1864.69	1814.55	1771.82	1806.22	1773.52	1793.36	2148.43	2106.38	2028.3	1974.76	2034.77	2132.38	2185.21	2248.17	2288.75	2356.42	3063.37	2986.88	2965.5	2925.85	2961.86	3152.62	3049.32	2971.26	2883.27	2798.34	2731.81
989	2	2	0.9	915.567	1023.78	1396.74	1732.61	1510.75	1409.1	1285.9	1175.74	1090.62	996.78	934.605	918.071	855.222	837.641	866.322	796.242	873.263	1545.04	2046.13	1812.16	1702.73	1608.1	1888.96	1876.04	1896.5	2424.71	2340.54	2307.49	2277.39	2517.23	2431.41	2343.39	2329.62	2176.83	2052.28	2415.03	2349.75	2390.12	2434.7	3121.75	2483.69	2383.24	2267	2123.73	1976.29	1949.84
1135	0.5	1.5	0.7	2077.75	2034.85	2000.32	1931.12	1904.01	1979.81	1871.91	1768.16	1690.57	1910.02	1860.04	2017.33	1976.2	1925.53	2050.49	2037.23	2045.75	2149.67	2105.18	2038.58	1982.18	2535.63	2505.86	2484.77	2479.43	2561.09	2543.59	2546.26	2818.15	3256.42	2791.93	2542.4	2546.3	2544.91	2534.78	2545.33	2545.8	2596.73	2540.68	2541.75	2559.73	2542.57	2525.8	2460.5	2382.71	2570.94
1269	0.9	0.3	0.1	4744.07	5223.56	5395.72	5842.42	6259.87	6248.56	6044.43	5761.17	5440.21	5163.23	4934.32	4712.25	4482.77	4393.88	4393.14	4390.04	4388.9	4486.97	4428.2	4367.19	4385.09	4374.73	4393.23	4393.85	4393.86	4410.27	4393.22	4469.3	4649.27	4482.01	4391.74	4386.32	4357.63	4373.58	4399.7	5017.27	6032.09	6255.4	6287.7	6285.42	6263.29	6279	6178.02	5972.81	5713.01	5433.03
1077	0.6	2	0.7	1424.29	1492.88	1541.87	1560.71	1708.3	1805.96	1731.29	1653.56	1579.4	1529.76	1470.17	1441.2	1379.04	1333.39	1348.52	1326.36	1299.3	1326.32	1282.6	1235.15	1194.67	1265.28	1710.35	1783.58	1775.47	2034.11	1848.59	1864.92	2076.43	2019.28	1842.17	1866.56	1862	1840.2	1809.26	1862.03	1865.95	1895.05	1859.16	1859.95	1867.45	1854.4	1867.37	1830.8	1777.09	1917.1
1026	0.8	0.5	0.1	2781.1	2928.17	3018.58	3108.15	3013.44	2974.7	2939.23	2864.8	2790.09	2718.71	2673.31	2758.18	2741.08	2816.79	2896.86	2896.68	2951.07	3059.7	3017.15	2983.13	2955.67	2936.47	3123.69	3045.93	3030.95	3725.52	3928.54	3794.47	3617.01	3474.61	3333.1	3173.61	3081.3	2953.07	2912.97	4155.94	4207.81	4244.98	4146.18	4199.23	4264.97	4176.06	4026.64	3844.7	3658.35	3540.73
740	9	2	2	2067.02	2084	2077.97	2028.37	1922.95	1825.22	1754.29	1742.48	1816.64	1837.02	1867.95	1890.25	1891.89	1886.94	1864.11	1835.09	1784.66	1816.3	1826.64	1792.98	1805.11	1878.69	1892.74	1922.18	1963.27	1987.78	1976.72	1954.16	1916.74	1887.41	1870.53	1854.34	1833.6	1940.77	1975.6	1987.35	1988.98	1979.91	1986.25	1954.09	1882.42	1846.79	1824.73	1782.89	1852.91	1921.52
1294	0.4	1.5	0.9	2842.63	2817.77	2789.93	2677.86	2532.79	2387.96	2235.09	2082.71	1960.5	1855.22	1744.77	1673.13	1584.61	1571.33	1593.36	1577.93	1582.85	1700.29	1594.05	1571.78	1580.6	1583.44	1580.11	1581.16	1583.45	1582.84	1583.5	1560.89	1539.62	1514.46	1480.85	1445.85	1411.16	1378.25	1346.93	1323.46	1310.12	1332.66	1368.66	1379.21	1344.54	1331.65	1302.99	1271.52	1238.83	1207.75
1848	1.5	1.5	1.5	417.485	380.042	535.003	397.856	368.87	370.762	371.138	371.464	371.972	372.687	430.226	401.763	372.511	409.199	380.197	384.11	371.214	379.254	370.77	371.425	371.623	371.829	371.539	376.49	457.609	380.579	373.92	413.151	368.948	371.106	371.541	372.013	371.607	373.004	390.303	675.656	425.516	378.195	379.532	463.985	450.505	377.439	370.643	371.079	371.581	371.646
1869	6	1	2	1521.18	1753.37	2054.48	2151.03	2026.72	1915.45	1810.93	1692.85	1575.81	1486.34	1401.2	1314.81	1136.95	1016.35	840.958	575.704	379.962	333.267	333.585	334.897	334.282	334.923	334.902	334.88	375.306	352.975	326.18	439.92	310.435	331.853	333.233	333.811	334.235	334.549	334.81	787.266	332.966	326.385	309.638	382.89	439.022	325.759	331.203	332.37	333.422	333.742
1863	1	1	0.1	2819.96	2998.68	3121.35	3142.26	3118.33	3098.98	3041.53	2957.17	2869.77	2809.46	2766.37	2722.11	2661.61	2751.36	2783.16	2748.29	2673.3	2606.61	2519.62	2434.83	2355.51	2274.76	2205.31	2151.44	2371.7	2626.07	2731.75	2717.24	2736.54	2668.24	2595.74	2525.52	2447.52	2385.02	2338.64	2467.12	2588.64	2737.24	2823.68	2996	2989.9	2944.07	2870.74	2785.68	2711.52	2635.67
1770	6	10	1	958.074	1024.96	1136.43	1109.45	1048.49	1014.55	980.187	945.111	912.914	881.935	854.409	836.494	822.97	904.97	917.514	905.103	882.257	883.769	851.176	821.206	797.639	772.706	756.853	792.959	916.42	1035.66	1075.61	1040.34	1002.03	974.336	942.339	915.062	892.431	862.26	840.39	972.985	994.224	1026.64	1018.98	1023.67	1046.39	1051.22	1000.03	964.354	932.623	904.257
965	4	8	1	792.381	814.548	868.162	1016.81	945.173	925.136	883.699	846.778	821.238	795.464	775.622	754.895	733.789	713.26	701.875	687.196	682.289	665.618	628.282	621.986	608.261	587.359	573.305	583.937	557.304	594.173	696.891	690.593	777.547	875.532	844.594	817.888	801.349	784.569	765.442	749.31	746.014	765.751	812.711	1059.91	982.702	1015.48	1026.67	976.4	945.466	921.28
1247	6	8	1	689.193	664.663	643.645	619.244	610.983	594.815	553.433	517.456	497.11	722.887	614.66	733.719	675.133	655.457	688.641	668.474	659.898	640.682	626.209	609.397	592.535	800.17	643.312	558.55	551.322	578.856	584.522	571.884	673.434	790.121	817.497	770.206	752.98	736.715	722.496	712.823	708.776	727.455	721.612	729.534	706.299	702.272	677.347	649.222	625.505	604.757
7313	0.5	0.1	7	2520.91	2529.9	2529.9	2529.9	2529.9	2529.9	2505.91	2332.44	2205.25	2269.43	2366.26	2466.31	2529.64	2529.9	2529.9	2529.9	2529.9	2529.9	2492.48	2275.68	2052.64	1972.87	2030.53	2141.15	2291.54	2407.22	2529.9	2529.9	2529.9	2529.9	2524.23	2424.92	2310.13	2415.42	2526.31	2529.9	2529.9	2529.9	2529.9	2529.9	2529.9	2529.9	2528.16	2438.06	2335.19	2366.06
1287	4	8	0.7	951.349	950.011	903.106	937.322	953.142	975.879	948.866	895.101	831.577	897.888	886.193	879.311	866.495	828.735	834.488	846.92	854.4	904.223	856.693	843.597	860.27	879.919	927.978	895.076	883.209	906.709	913.766	955.809	928.405	840.464	905.691	961.883	975.11	982.063	977.222	886.67	936.874	916.667	878.785	937.06	910.996	861.663	895.567	907.322	905.061	870.538
1186	1	2	1.5	570.538	568.449	422.042	406.902	332.662	256.285	244.972	245.504	245.865	246.001	245.884	245.814	245.699	245.718	245.601	245.623	247.97	280.413	244.579	245.32	245.416	245.812	246.012	245.125	245.466	255.899	244.236	245.099	245.253	245.432	245.567	245.818	245.934	246.153	246.617	346.504	243.846	302.524	255.854	244.17	245.236	245.147	245.398	245.646	245.88	246.01
1042	1.5	0.5	0.1	1481.95	1513.1	1543.86	1576.13	1573.47	1562.35	1542.08	1519.35	1496.38	1478.9	1466.39	1455.8	1442.45	1443.34	1443.4	1440.25	1438.21	1451.8	1440.28	1423.22	1405.58	1392.66	1391.79	1385.68	1404.46	1569.73	1629.01	1620.97	1609.75	1611.15	1598.27	1577.52	1559.15	1542.22	1535.46	1787.24	1778.66	1730.73	1709.44	1721.61	1729.52	1704.79	1696.52	1676.98	1657.6	1656.68
884	3	0.2	0.1	1527.24	1521.54	1526.79	1522.4	1528.04	1524.29	1521.2	1525.9	1532.85	1534.51	1529.64	1531.63	1536.89	1524.47	1532.98	1526.63	1528.2	1538.83	1530.43	1538.61	1537.83	1535.81	1539.05	1535.28	1536.57	1533.13	1539.79	1533.4	1535.27	1531.48	1533.54	1527.24	1534.4	1528.75	1537.42	1531.87	1533.15	1525.85	1532.45	1525.99	1535.48	1528.74	1527.02	1518.56	1537.03	1535.07
1273	4	1	1.5	231.264	231.497	230.74	230.84	239.428	231.423	230.87	229.731	229.177	231.316	231.707	245.355	230.66	230.737	235.794	230.322	230.571	237.388	230.108	230.878	231.052	253.05	230.974	230.49	230.724	232.234	231.003	229.916	268.119	230.076	229.6	230.222	230.592	230.722	230.894	230.889	231.119	231.892	230.389	229.971	230.419	230.576	230.818	230.995	231.115	231.169
961	0.1	1.5	0.4	0	0	0	0	0	0	0	0	0	0	0	0	0	0	0	0	0	0	0	0	0	0	0	0	0	0	0	0	0	0	0	0	0	0	0	0	25.8422	68.0898	114.374	238.496	287.119	314.329	327.02	333.429	339.189	346.75
1144	5	8	1.5	215.415	191.071	188.81	196.705	197.562	198.842	207.661	211.972	215.458	300.667	201.758	226.756	199.154	205.442	199.935	203.609	203.84	336.952	191.418	204.89	207.397	386.935	238.751	190.54	200.63	493.728	180.784	199.547	407.05	280.224	177.513	196.207	200.161	204.709	208.443	327.704	151.642	226.345	191.412	186.692	188.461	189.022	200.156	203.581	207.887	208.133
616	10	0.6	1	1334.5	1259.84	1177.45	1206	1280.87	1203.43	1223.81	1284.52	1325.42	1324.61	1330.73	1315.67	1306.63	1308.75	1332.8	1336.28	1300.13	1320.04	1332.84	1289.5	1347.15	1319.46	1310.59	1337.9	1334.44	1300.61	1350.5	1309.24	1332	1321.35	1321.77	1332.06	1332.01	1359.9	1364.5	1316.38	1330.01	1349.87	1359.18	1359.81	1330.73	1341.29	1328.94	1334.55	1349.36	1362.05
911	6	1	2	207.557	197.573	195.802	191.553	200.55	201.12	204.366	207.882	207.332	209.334	209.718	210.204	210.042	210.583	209.166	209.439	210.493	211.182	210.41	210.432	211.084	211.219	211.436	210.004	209.87	287.128	244.013	183.445	205.214	175.004	193.199	196.977	200.809	201.165	202.057	211.842	187.141	291.253	175.108	163.089	163.339	176.97	178.818	190.949	198.72	199.247
1006	0.7	1.5	1	628.924	647.887	651.801	657.775	634.446	617.223	593.388	569.067	549.354	533.613	524.654	518.155	502.671	504.382	499	484.935	495.877	533.919	523.865	507.215	494.122	491.511	537.151	515.844	519.333	589.206	555.037	539.291	528.717	543.04	520.504	518.857	532.219	505.599	500.798	611.506	556.817	555.243	541.463	597.177	641.762	599.474	583.878	563.105	544.996	583.139
1048	10	1	0.6	815.056	892.751	1072.83	1280.34	1254.8	1259.56	1232.2	1097.17	956.828	832.77	812.689	812.534	812.917	813.175	812.916	812.183	802.721	812.487	780.097	730.96	685.025	646.332	758.514	812.177	814.505	1038.57	1044.41	899.731	993.452	1281.17	1186.13	1058.11	917.286	815.865	813.116	814.796	810.752	833.8	845.33	1192.55	1121.16	1356.56	1385.33	1288.05	1156.64	1092.49
1123	1	0.1	0.1	1403.6	1424.95	1414.89	1394.98	1385.24	1382.17	1381.93	1381.05	1383.71	1440.04	1417.3	1420.25	1391.79	1387.74	1387.37	1383.33	1389.33	1428.63	1407.02	1383.25	1382.21	1382.72	1383.23	1384.25	1391.61	1466.84	1471.11	1449.41	1483.35	1550.52	1526.42	1493.85	1455.8	1419.06	1388.95	1508.87	1531.94	1522.36	1536.44	1531.14	1595.91	1604.22	1577.21	1535.59	1492.34	1452.9
1032	4	1.5	0.7	506.374	574.949	669.674	758.692	758.424	744.822	706.598	659.996	618.407	577.299	537.784	501.969	462.799	431.601	415.794	397.983	393.299	430.813	415.165	389.796	363.234	343.474	445.016	461.202	456.504	601.84	616.835	614.938	683.705	823.129	730.814	724.283	710.289	685.891	657.429	664.938	735.289	769.561	754.339	868.928	766.516	756.456	755.439	739.605	717.1	735.117
1774	1.5	1.5	0.8	753.431	785.168	929.454	840.085	741.525	738.598	727.235	703.376	675.212	644.748	612.278	582.316	552.813	607.624	732.591	748.107	725.555	744.758	684.064	649.599	611.65	570.733	534.449	510.393	639.922	1033.98	1006.3	794.801	740.162	736.191	719.352	695.71	709.146	676.815	692.31	790.97	755.683	815.325	742.727	761.642	754.298	725.804	703.685	685.899	658.09	626.722
1781	7	3	0.9	476.302	647.223	712.784	645.014	520.087	460.36	382.237	314.67	262.376	220.813	190.715	188.119	191.342	453.43	647.187	673.884	499.119	505.154	402.43	325.786	268.015	218.4	189.957	191.687	447.429	685.883	671.075	556.083	527.977	471.069	392.752	365.325	301.748	248.183	252.016	536.698	665.537	733.278	686.476	690.005	586.632	535.443	440.337	368.885	308.728	257.621
355	8	0.3	0.5	1192.79	1205.73	1202.84	1194.25	1180.76	1180.28	1126.73	1002.33	936.789	905.926	980.711	1125.51	1206.02	1202.7	1202.91	1196.74	1181.21	1189.58	1163.26	1048.55	964.967	926.162	910.152	990.232	1083.15	1160.1	1200.4	1198.88	1189.23	1189.57	1172.24	1057.79	982.491	953.794	1046.26	1185.15	1201.01	1198.94	1195.13	1187.39	1162.66	1175.85	1208.06	1112.02	1087.17	1172.17
1101	3	5	1.5	185.918	166.862	286.908	207.204	166.789	168.611	169.532	169.883	170.232	170.247	183.121	191.32	168.343	180.846	169.043	172.388	168.6	168.746	169.17	169.609	169.933	170.084	170.07	169.991	181.028	198.516	166.621	183.564	167.069	168.979	169.61	169.913	170.028	170.225	170.835	412.021	261.203	166.694	166.536	225.25	242.2	177.771	168.973	169.679	169.98	170.068
1023	2	10	0.6	613.69	605.121	591.57	502.112	513.315	515.359	512.352	602.88	610.753	614.956	619.702	618.903	622.847	619.177	619.157	619.531	624.957	618.935	609.683	603.114	601.543	563.22	583.156	595.574	591.21	610.902	633.074	606.308	613.191	628.918	604.163	611.584	602.136	576.96	544.365	513.397	490.562	492.301	529.833	558.759	569.663	588.394	604.502	612.821	617.136	619.932
1060	0.8	1.5	0.7	439.377	456.468	480.048	508.404	491.14	481.556	464.489	444.178	427.278	416.091	405.388	429.254	416.178	429.78	449.243	445.257	465.219	491.6	479.012	476.683	468.518	464.968	528.047	522.593	530.526	612.464	565.813	552.747	540.568	553.516	547.05	526.61	508.83	492.879	487.965	666.351	580.51	599.778	582.509	588.356	628.431	582.794	566.174	547.51	530.308	517.421
1864	1	1.5	0.9	524.498	577.898	782.668	977.721	833.933	708.934	607.135	546.026	496.054	466.257	445.536	465.339	446.733	459.173	472.316	465.37	433.729	407.602	375.076	339.766	310.491	283.496	260.438	243.172	279.197	350.482	364.226	433.225	460.646	412.276	380.714	363.825	362.105	358.08	364.54	770.999	913.159	902.201	847.707	934.615	996.832	1084.7	973.406	837.757	718.629	621.994
1797	8	3	0.5	452.121	422.557	383.745	357.181	463.566	479.746	495.797	503.141	509.822	507.847	507.877	506.379	506.315	472.172	443.117	464.751	473.15	486.205	462.923	489.471	480.406	448.854	426.304	494.003	509.674	385.689	426.142	473.209	493.551	494.866	500.896	501.041	505.058	508.285	501.801	449.687	435.422	425.803	416.991	420.443	451.1	458.836	497.194	510.039	509.329	512.23
305	0.9	8	0.6	225.892	356.332	340.224	325.376	283.394	232.422	331.295	404.145	401.191	303.529	312.798	312.573	216.378	336.848	308.935	307.755	300.818	223.425	208.857	355.978	407.745	368.105	368.329	284.787	374.427	294.787	233.229	282.375	266.024	244.258	373.978	334.681	377.566	352.963	303.666	314.763	337.483	292.411	286.206	305.287	307.424	349.973	295.911	252.768	390.985	335.924
968	5	2	0.3	563.01	563.241	566.183	701.189	598.372	560.342	562.276	562.651	562.615	562.633	562.498	562.592	562.701	562.718	562.556	562.649	577.564	562.358	562.911	562.982	562.786	562.733	562.626	562.639	562.717	562.643	562.154	562.338	564.55	560.877	561.984	562.846	563.018	563.087	563.115	563.148	563.248	563.274	567.236	587.242	562.013	561.302	561.391	562.727	562.691	562.458
1019	9	3	9	102.552	114.641	128.325	121.497	108.565	106.681	105.171	103.689	102.494	101.546	100.933	100.51	99.1942	102.994	109.742	106.344	114.289	125.3	109.513	109.272	107.491	105.983	105.433	104.376	111.263	120.255	66.4237	44.9498	41.3067	41.6204	41.9708	42.14	43.8683	44.3869	44.7852	104.001	44.0076	26.774	27.306	65.0918	88.6864	55.3586	53.1159	52.0905	51.4918	52.164
1302	5	1.5	0.8	550.358	549.301	547.464	545.301	542.711	538.171	529.028	522.972	526.871	538.502	542.787	555.245	556.695	555.844	565.498	555.533	554.612	649.768	598.793	561.247	556.073	556.192	555.931	555.935	554.752	554.8	554.192	550.742	549.344	545.378	537.602	532.151	527.32	524.661	523.182	524.079	527.269	538.521	553.962	551.866	543.638	542.257	538.809	535.335	531.487	529.707
1824	9	0.7	0.1	437.307	431.361	675.141	598.483	462.112	524.702	506.075	505.076	508.256	552.708	532.307	594.678	557.077	446.48	509.915	483.656	504.392	566.811	506.204	513.74	514.359	517.188	518.269	548.994	373.631	392.418	493.886	514.887	492.686	509.974	505.857	508.351	508.75	510.821	519.049	383.234	544.271	429.142	444.734	407.66	469.602	516.369	501.314	507.83	511.723	510.024
1316	6	0.1	0.5	0	0	0	0	0	0	0	0	0	0	0	0	8.27492	21.0027	41.2081	69.9483	130.101	183.121	212.777	199.834	197.51	195.415	201.691	196.729	191.008	185.727	182.208	174.235	167.612	159.976	152.481	144.577	137.895	133.327	130.968	127.649	123.937	121.448	119.317	116.742	114.024	112.546	111	107.995	105.055	103.207
1835	9	0.7	0.1	427.254	435.8	699.472	571.635	566.445	549.41	507.817	492.917	495.129	519.134	505.347	515.063	533.96	426.632	490.073	491.089	488.391	592.377	499.528	499.926	501.544	503.953	504.484	573.065	424.537	369.923	495.868	499.269	566.828	548.887	501.214	495.112	496.256	499.311	507.638	393.828	448.285	456.743	425.317	447.555	425.16	730.615	600.857	494.591	496.466	498.926
1847	0.3	0.1	0.1	1293.9	1293.9	1293.9	1293.9	1293.9	1293.9	1293.9	1293.9	1293.9	1293.9	1293.9	1293.9	1293.9	1293.9	1293.9	1293.9	1293.9	1293.9	1289.75	1219.51	1080.47	924.977	891.848	1089.34	1293.9	1293.9	1293.9	1293.9	1293.9	1293.9	1293.9	1293.9	1293.9	1293.9	1293.9	1293.9	1293.9	1293.9	1293.9	1293.9	1293.9	1293.9	1293.9	1293.9	1293.9	1293.9
1231	4	8	0.8	417.428	475.219	477.551	480.433	482.354	473.996	456.554	438.669	422.128	408.459	395.541	384.563	372.536	361.748	352.031	342.164	339.456	469.206	444.697	431.767	422.482	419.005	444.766	454.868	455.28	467.041	474.113	473.256	473.519	471.925	464.632	450.583	434.966	420.942	411.388	484.996	457.172	476.065	493.623	498.118	498.322	503.026	498.025	486.844	474.073	459.975
1140	6	8	1	470.775	469.656	467.355	464.779	463.462	462.678	460.279	458.009	455.848	455.329	453.894	454.502	452.279	450.442	449.645	447.347	445.91	444.972	442.735	440.817	438.976	437.39	435.757	434.099	432.395	430.907	429.115	426.83	427.291	429.36	430.717	426.961	424.868	422.89	421.062	420.233	420.631	431.347	425.744	423.859	421.369	419.917	417.923	415.666	413.448	446.51
1296	0.9	10	3	427.663	381.115	325.754	289.599	259.11	222.111	190.699	167.421	149.061	134.252	126.624	126.609	126.607	126.44	126.435	126.491	126.515	131.981	122.244	125.949	126.496	126.984	128.574	125.526	126.19	126.252	126.241	126.401	128.602	124.93	126.257	126.377	126.44	126.581	126.579	129.618	125.798	126.328	126.446	124.396	130.881	123.251	126.186	126.351	126.452	126.511
1659	0.9	10	1	349.608	354.788	385.676	383.815	373.491	366.799	356.832	349.021	341.807	333.79	326.252	320.364	315.126	330.871	323.705	325.564	343.596	338.778	330.121	327.296	351.607	334.546	329.031	325.015	330.612	383.596	438.385	395.515	385.771	381.471	374.748	365.874	357.421	349.97	347.872	386.626	379.354	382.802	390.4	410.24	421.402	421.029	411.079	401.29	391.622	390.849
1277	3	1.5	0.7	494.094	493.625	491.498	489.928	494.292	492.585	486.438	480.116	475.52	473.347	470.847	475.938	475.799	478.466	484.599	490.97	490.864	506.417	496.757	491.027	489.139	487.282	485.573	483.469	481.06	479.841	478.751	477.696	480.213	479.129	475.695	471.444	467.763	464.628	462.181	461.096	461.465	466.769	472.723	476.601	476.04	474.828	471.721	467.893	464.095	461.303
1021	2	1.5	8	92.678	94.6513	55.7543	66.1774	45.7804	55.8179	61.4171	61.6125	61.3056	61.7682	61.5133	62.3979	61.1302	59.5212	60.281	59.4093	62.0436	69.806	70.0845	69.6667	71.1528	74.3562	100.497	80.655	82.5122	102.509	56.4036	62.0233	83.618	94.2422	101.425	99.983	99.4139	98.8407	98.0026	98.7053	97.7243	107.956	99.3858	37.9738	17.2923	55.8437	61.5422	60.0226	63.9091	70.197
1280	1	0.1	3	1166.54	1089.76	1013.28	935.793	863.996	828.073	787.637	745.6	883.78	1209.37	1203.14	1210.41	1211.3	1211.08	1211.3	1208.37	1191.01	1150.57	1083.72	1005.94	942.994	921.153	932.96	885.317	848.993	846.506	846.635	846.633	846.683	846.397	845.179	838.038	833.098	832.663	835.552	840.567	845.198	846.658	846.704	846.499	845.988	844.061	830.227	810.53	791.336	779.825
1120	6	8	1	270.646	270.214	268.39	265.811	263.925	260.736	253.94	248.024	244.057	241.574	239.288	237.892	235.362	232.759	230.964	228.312	226.024	223.741	219.507	216.491	214.586	213.448	212.499	210.638	208.435	207.42	206.156	204.29	215.218	233.813	226.881	223.639	220.885	219.08	217.692	217.556	216.652	216.77	217.149	217.181	216.283	215.669	211.618	206.002	201.425	223.579
182	0.4	0.7	0.2	1023.97	1102.69	1102.6	1102.57	1100.38	1068.03	1015.31	973.353	943.686	916.086	889.632	867.499	844.106	898.349	1007.99	1102.23	1088.06	1036.8	877.69	786.412	743.56	694.922	718.429	976.437	1102.59	1102.7	1102.67	1102.7	1102.61	1102.3	1089.12	1054.86	1035.27	1022.68	1053.13	1102.67	1102.64	1102.55	1102.58	1102.7	1102.7	1102.43	1084.06	1052.62	1038.08	1024.47
7311	3	1	1.5	104.597	109.387	108.09	108.615	104.373	104.42	104.449	104.509	104.576	104.641	104.646	104.697	104.702	104.713	104.734	104.715	104.721	105.085	104.371	104.469	104.543	104.625	105.684	105.568	105.198	110.179	104.94	104.281	114.58	114.893	103.817	104.271	104.331	104.396	104.481	104.525	104.611	116.101	105.655	121.221	103.745	104.089	104.259	104.418	104.417	104.522
1755	0.8	1.5	0.3	412.155	424.49	432.802	407.445	400.78	400.688	400.628	400.714	399.183	396.011	393.484	398.233	401.021	447.639	404.376	402.313	400.679	451.376	399.86	401.039	400.794	400.681	400.856	414.781	445.549	434.223	401.905	401.03	400.985	400.739	401.118	400.962	423.085	397.563	398.602	423.155	411.032	414.11	400.601	432.188	498.465	461.718	400.74	400.813	400.95	400.805
1152	0.1	2	1	0	0	0	0	0	0	0	0	0	0	0	0	0	0	0	0	0	0	0	0	0	0	0	0	0	0	0	0	0	0	0	0	0	0	0	0	0	0	0	0	0	0	0	0	0	0
1192	7	6	1.5	89.9753	95.4532	85.313	86.8648	85.8089	86.5044	88.1043	89.1869	89.8575	89.7334	90.2344	89.9885	89.6215	90.1092	89.6366	89.4656	89.8678	97.3683	88.3801	89.5268	89.7624	90.6008	90.1137	89.8975	90.076	88.4637	88.3624	89.4048	89.7545	89.9329	90.4246	90.7509	90.9206	90.7301	91.4125	137.275	129.074	113.831	84.2124	87.0386	88.7083	88.9938	89.6487	90.7807	90.097	90.7238
541	9	9	0.3	362.692	353.014	357.241	359.223	302.321	285.034	358.311	351.01	353.765	357.993	358.142	354.389	358.402	361.575	362.019	356.272	330.302	304.8	309.646	310.204	304.863	303.68	307.016	308.513	311.344	311.269	308.995	321.144	302.989	301.154	306.763	326.109	349.833	358.116	357.745	361.738	351.252	352.194	350.979	350.281	327.414	254.118	234.251	260.197	278.88	292.805
1822	10	0.8	0.3	299.212	287.381	243.935	268.669	390.363	326.317	329.327	332.89	334.449	333.582	334.729	333.572	336.944	284.316	363.741	375.834	367.079	421.574	334.601	338.205	339.603	340.566	341.326	357.477	299.575	255.715	271.7	313.871	359.904	330.657	330.769	332.811	332.392	332.614	343.524	273.979	299.882	299.652	286.077	279.067	321.517	294.36	329.044	332.388	335.454	335.867
972	8	1.5	0.4	373.324	391.969	437.727	541.559	358.111	360.211	360.816	361.274	361.58	361.958	361.995	362.422	361.171	358.408	354.849	351.492	365.555	365.124	361.705	361.982	361.553	357.931	354.066	350.974	347.688	352.465	364.134	361.531	361.713	361.734	361.729	361.856	361.711	360.069	355.937	351.459	346.517	348.193	365.117	509.604	445.388	406.833	372.199	361.676	361.438	359.139
613	1.5	1.5	1.5	85.5574	110.123	90.3876	113.12	539.863	890.574	745.961	478.274	309.583	213.969	158.296	92.5404	85.4211	86.3381	87.0767	97.3479	80.1734	83.1078	87.1217	87.6519	87.731	87.6153	87.7267	88.0674	87.7137	87.6232	113.36	97.8978	113.253	75.9053	84.4794	87.567	87.7956	87.7608	87.4471	87.0589	87.0468	86.8212	138.373	95.4768	88.7608	94.8456	83.043	87.1155	87.4284	87.4873
1086	10	5	6	64.9699	64.7781	64.442	64.1087	63.3175	62.1932	61.0607	60.215	59.5727	58.826	58.409	58.1439	57.6171	57.1281	56.9263	56.4633	55.5956	54.6578	54.0059	53.5748	52.9796	52.6188	52.2824	51.9182	51.5459	51.3157	51.1116	50.6101	49.8579	49.0549	48.3312	47.8355	47.3717	47.0476	46.7637	46.8854	47.1411	53.605	58.6864	63.9852	60.89	59.7569	58.7943	58.0411	57.0869	56.5895
1295	9	0.5	0.1	578.658	603.692	604.262	602.943	605.974	603.762	594.18	582.084	570.731	564.183	557.867	557.417	557.823	572.248	574.028	569.773	574.652	598.155	595.121	587.045	586.345	583.218	599.38	606.126	605.432	607.03	604.041	605.76	599.665	606.814	606.881	602.695	593.909	591.012	600.147	594.645	598.87	604.015	601.506	595.695	604.555	602.127	603.029	604.892	606.283	603.649
1139	10	10	1	236.074	235.568	231.896	227.216	223.468	218.865	211.236	204.7	203.656	225.449	220.174	232.838	223.064	222.599	243.316	233.16	231.821	232.83	225.868	220.286	216.6	262.203	262.291	256.458	253.564	258.504	259.696	256.239	282.95	305.968	300.943	290.18	286.212	283.373	281.056	283.605	288.59	293.26	292.218	292.383	288.82	286.676	279.947	272.593	265.989	266.836
1862	2	4	0.5	305.165	275.243	481.164	648.33	289.381	315.889	305.978	299.247	283.102	281.469	309.063	311.606	308.913	487.214	284.04	303.127	276.098	299.289	271.082	252.23	229.265	202.768	179.486	169.028	304.889	272.536	281.341	306.673	266.714	268.59	269.466	269.238	255.427	247.66	270.526	293.674	212.528	294.64	282.154	282.081	268.494	301.517	301.862	295.716	284.664	268.257
629	6	1.5	0.3	283.18	346.357	230.839	258.688	301.308	304.031	251.642	273.308	277.974	277.159	272.986	268.556	277.199	283.277	275.893	275.749	276.371	273.355	275.745	274.548	276.277	278.712	276.971	275.673	275.014	277.214	275.181	278.752	278.51	276.155	277.567	277.455	280.929	281.719	281.2	284.008	281.008	279.462	286.369	280.999	284.176	282.548	282.062	321.555	278.291	278.1
1000	6	2	0.7	277.531	300.027	313.699	316.419	309.057	303.455	294.821	284.613	274.913	267.198	267.514	283.583	277.512	292.706	303.653	296.494	316.771	320.541	301.444	295.835	290.677	286.957	311.716	320.245	317.578	337.291	305.476	305.213	300.87	315.091	304.466	298.93	298.956	290.316	286.228	350.793	298.152	302.648	298.835	343.177	313.716	305.278	299.271	290.749	282.885	300.84
7306	0.2	0.1	0.1	789.7	789.7	789.7	789.7	789.7	789.7	789.7	789.7	789.7	789.7	789.7	789.7	789.7	789.7	789.7	789.7	789.7	789.7	789.7	789.7	786.084	733.915	667.226	783.359	789.7	789.7	789.7	789.7	789.7	789.7	789.7	789.7	789.7	789.7	789.7	789.7	789.7	789.7	789.7	789.7	789.7	789.7	789.7	789.7	789.7	789.7
991	0.8	1.5	1.5	82.0744	88.8985	83.1809	90.1878	74.6477	75.4584	75.8225	76.266	76.4965	76.6623	76.6377	77.2203	76.6923	76.7496	76.6897	76.5271	83.2521	78.3051	75.9685	77.45	76.0499	76.6894	106.741	81.6576	76.3915	92.7315	74.3894	74.924	77.243	91.3034	74.3097	75.2901	75.8481	76.1977	76.3694	76.4545	76.6106	82.0949	79.0526	201.138	73.4856	74.4018	74.7291	75.7097	76.0355	76.1857
7317	0.9	8	0.5	285.601	286.75	278.804	239.144	250.253	269.091	272.536	271.128	267.572	263.44	258.542	255.429	252.644	286.666	276.27	294.561	291.666	289.361	286.988	281.199	274.598	265.943	260.176	270.838	272.935	269.274	285.9	285.582	295.017	297.231	295.827	296.415	295.894	292.293	287.977	272.818	261.414	269.268	264.132	281.686	287.61	271.282	273.304	275.879	275.838	274.729
998	8	0.4	1.5	508.363	503.281	507.836	502.376	487.763	458.236	377.927	350.716	387.347	475.07	505.391	507.454	506.828	510.321	507.165	504.639	505.918	450.06	312.115	147.723	75.7997	74.8024	73.3981	73.5739	73.7048	73.7509	73.4149	73.4375	74.0523	72.4469	72.1659	71.4332	71.7907	72.1834	72.281	72.2064	72.4005	73.1443	78.4943	93.017	69.7033	69.2002	70.0557	70.4143	70.4303	71.3335
1716	6	1.5	0.7	215.357	241.877	308.603	292.583	273.17	263.242	250.467	233.305	217.532	204.948	196.438	200.178	195.144	247.77	247.704	238.744	278.801	291.578	256.439	247.004	235.91	222.723	214.407	210.842	291.931	391.779	342.062	293.633	283.329	286.702	274.153	255.765	243.299	232.908	221.559	438.26	337.378	305.344	293.287	316.764	454.475	349.209	285.774	268.687	254.736	290.688
1896	8	0.9	0.5	394.337	476.333	466.101	343.446	326.328	392.186	377.344	342.017	308.643	322.373	301.075	293.573	292.811	419.465	410.987	413.804	369.924	353.053	302.058	294.006	293.606	293.968	293.878	294.677	409.034	470.15	461.005	459.79	398.938	360.438	339.089	322.809	293.5	300.89	294.086	401.355	419.697	457.038	480.758	480.433	481.686	428.642	392.43	352.283	338.196	300.416
1883	0.8	2	10	45.3231	7.6012	29.5481	4.48489	4.96756	6.60412	2.14321	0.331186	0.833409	7.1227	10.9901	19.9296	20.782	25.5196	0.279526	0.902733	0.386388	4.1108	5.14363	11.6043	12.012	12.2695	14.6441	20.424	27.4819	5.58331	7.96821	9.45097	31.8807	13.2863	10.552	14.52	13.4029	16.0587	17.9117	38.0901	12.2766	21.1226	13.3844	10.1283	0	1.00724	0.783701	1.14816	5.05856	3.98501
1285	2	1.5	1.5	133.868	129.982	126.775	124.304	131.725	112.019	101.961	96.5119	92.4125	89.6782	87.1846	90.3403	81.2418	79.4833	74.4059	68.934	69.0157	110.587	69.197	69.023	69.0362	69.0323	69.0336	69.0267	69.0449	69.0585	69.0795	69.1497	71.9554	68.9034	69.0498	69.0685	69.0915	69.1228	69.2006	69.1739	69.4208	82.4761	71.5327	68.6794	70.1379	68.9683	69.0355	69.067	69.0806	69.0955
1266	0.8	1.5	0.6	313.947	311.077	298.058	287.391	280.527	274.351	272.607	270.76	268.604	267.543	266.295	265.435	263.075	261.402	259.971	257.607	256.57	257.38	257.307	254.433	254.661	254.87	255.729	255.463	255.059	255.408	255.811	257.075	261.454	262.878	262.101	259.669	256.535	254.438	254.205	270.915	274.69	297.933	294.245	277.924	282.896	277.296	273.083	273.995	274.203	273.765
1176	3	0.6	0.1	572.248	491.068	463.863	447.264	435.343	432.158	434.432	441.06	457.23	641.319	589.476	658.078	580.808	503.27	477.876	476.058	478.172	477.997	478.098	477.883	474.124	475.439	472.636	466.312	459.246	461.745	461.272	453.796	476.21	492.283	484.936	477.686	477.962	477.24	472.653	467.04	464.65	482.481	478.002	476.596	473.322	477.875	478.096	478.05	475.983	490.334
924	2	1	0.6	281.225	274.207	282.846	288.599	272.745	279.597	268.773	265.222	272.378	267.576	271.536	289.106	287.538	289.477	297.26	290.265	283.097	275.657	306.964	333.933	309.086	297.539	291.455	287.298	277.168	303.72	377.997	391.46	400.426	428.043	443.252	453.941	450.147	443.22	450.944	477.358	470.257	483.09	473.297	510.373	471.449	459.587	441.086	418.373	400.831	386.383
758	1	1	1.5	105.33	78.3678	65.8339	65.7615	65.9205	66.7215	66.3169	70.903	68.395	66.407	66.493	66.2658	66.2262	66.2788	66.5018	66.694	66.8704	73.0181	76.8822	71.5548	72.5482	84.1014	70.8457	66.653	66.8256	66.5176	67.0386	69.7454	71.4241	66.5854	69.3909	66.3415	67.376	74.0345	67.052	66.0009	65.9783	65.905	65.817	66.2224	66.9033	70.3666	70.8423	66.6288	67.2134	67.4511
1257	0.1	10	0.2	0	0	0	0	0	0	0	0	0	0	0	0	0	0	0	0	0	0	0	0	0	0	0	0	0	0	0	0	0	0	0	0	0	0	0	0	0	0	0	0	0	0	0	0	0	0
895	0.6	0.6	0.1	666.1	666.1	666.1	666.1	666.1	666.1	666.1	666.1	666.1	666.1	666.1	666.1	666.1	666.1	666.1	666.1	666.1	666.1	666.1	666.1	666.1	666.1	666.1	666.1	666.1	666.1	666.1	666.1	666.1	666.1	666.1	666.1	666.1	666.1	666.1	666.1	666.1	666.1	666.1	666.1	666.1	666.1	666.1	666.1	666.1	666.1
1317	0.9	9	0.1	254.692	256.819	253.317	250.075	250.227	259.51	252.271	263.323	256.725	256.562	258.621	257.191	257.925	257.878	258.213	257.177	257.417	255.31	256.112	255.386	257.613	257.457	254.645	258.075	258.245	259.268	258.424	257.492	259.3	258.798	255.119	252.375	249.571	250.137	255.799	259.692	261.452	258.061	258.137	255.67	249.092	244.437	248.289	248.676	245.574	249.407
1242	3	2	0.8	189.738	180.085	173.377	164.117	152.223	132.157	96.5208	64.4081	94.6841	329.122	181.767	194.731	208.6	218.936	225.446	228.559	223.802	198.776	167.341	147.661	153.472	146.053	140.433	137.641	135.047	134.006	128.122	121.016	111.815	86.203	63.5919	62.6781	61.4115	61.0397	60.4161	62.4298	130.576	188.888	185.052	181.059	170.33	145.29	96.4057	63.1829	61.3466	61.6632
107	0.6	1	0.8	451.436	518.954	591.703	616.239	610.038	593.901	551.712	475.956	419.129	377.792	343.273	336.314	334.321	362.373	375.076	364.423	336.899	308.827	276.382	244.631	221.982	205.183	205.142	385.826	576.729	616.7	616.7	616.7	615.596	605.735	581.353	525.261	481.79	458.126	437.877	529.536	616.144	616.454	616.7	616.7	615.97	607.187	586.434	540.498	504.25	480.64
1841	3	0.3	0.1	413.091	408.484	475.997	514.819	408.629	404.603	405.203	404.896	404.458	404.085	401.172	402.066	400.194	427.057	403.548	407.828	405.617	404.473	402.22	397.976	392.074	383.543	375.478	377.62	452.265	544.458	498.155	404.967	404.645	405.021	405.847	406.484	402.579	396.676	394.651	435.228	405.026	409.219	404.145	407.997	406.7	404.238	404.755	405.967	404.76	400.678
907	2	1.5	3	50.4507	43.4901	46.1613	41.0145	46.6634	49.184	50.957	52.3921	52.1846	51.0149	51.8136	52.0724	52.6841	52.9959	50.9144	51.4983	50.9002	52.2634	52.8097	52.5825	52.427	52.7783	52.5893	52.4392	52.5456	54.6955	61.1865	32.1838	38.8223	34.9416	39.9804	46.4913	48.6605	49.4356	48.2532	41.963	42.9982	46.0024	33.8524	20.7826	25.3832	35.7971	40.5241	44.9062	49.2568	48.8341
80	0.6	1.5	0.2	531.653	555.417	559.352	558.198	540.063	527.705	463.992	365.475	237.254	218.94	231.501	291.776	375.76	362.995	489.551	550.426	546.844	549.553	486.869	401.137	265.223	223.04	234.411	488.695	547.39	556.546	560.346	560.69	555.768	527.895	480.893	399.721	271.259	225.453	232.536	351.954	537.941	558.174	558.628	555.672	546.626	536.039	542.348	468.724	401.647	265.302
1236	0.2	0.9	1	198.369	194.465	190.822	186.462	181.786	171.988	153.476	134.74	124.794	121.398	118.61	117.432	116.634	114.918	114.405	114.247	111.493	106.716	95.6999	81.8091	74.2162	84.5247	82.0097	79.3453	78.2445	77.9869	78.0638	77.4253	76.4275	76.0506	70.7166	57.774	53.19	53.2542	53.3034	53.2924	53.3072	53.2914	53.4871	53.5606	53.2058	53.2082	53.2501	53.275	53.3041	53.3337
981	9	7	1	79.4447	96.3629	122.163	123.99	49.7547	51.0796	51.5556	54.7211	58.0421	61.6296	65.9886	70.5937	75.3246	80.0954	85.2087	90.7607	97.5223	105.726	75.3602	61.0658	54.5329	53.1004	53.1031	53.1696	53.08	58.607	58.2021	53.4394	53.0507	53.0732	56.4718	55.2092	52.721	52.7614	52.7227	52.7503	52.7233	57.1983	57.8124	76.6219	61.054	56.5886	60.5552	62.1294	60.5002	59.485
1093	1.5	1.5	1	52.7022	54.0024	55.2459	53.1202	53.3951	52.8607	52.2577	52.4167	52.7859	53.3447	52.5131	55.0423	53.3114	58.4753	65.378	57.1564	63.0074	90.3755	69.3823	62.1232	55.7935	52.9418	53.352	52.5439	59.5618	171.257	146.092	123.177	125.795	160.218	139.108	126.395	114.294	103.712	96.084	145.122	154.011	142.589	145.203	137.228	208.491	165.63	148.617	134.386	120.127	108.717
1709	4	7	0.9	149.111	172.002	190.618	184.493	177.924	172.482	165.401	157.391	146.522	134.181	123.709	117.588	111.163	133.035	152.432	166.407	173.989	181.077	149.55	139.684	129.952	122.017	117.519	122.479	146.463	176.438	183.847	159.442	144.317	159.534	158.012	149.217	137.429	126.062	119.584	128.225	127.012	154.208	177.184	192.965	182.903	169.378	158.3	148.196	135.438	124.39
1017	1	1.5	1.5	53.6216	67.6153	59.8812	48.87	50.2449	50.43	50.5868	50.6041	50.6713	50.694	50.7034	50.7278	50.7329	52.4364	50.786	50.6297	57.0082	58.441	50.7627	50.4657	50.6159	50.6867	50.7238	51.4003	65.5285	126.995	68.7866	49.9402	50.0509	50.4003	50.5127	51.9967	54.9014	50.4607	54.8811	274.997	336.571	284.215	254.772	269.545	299.046	230.224	191.829	159.68	132.66	110.729
1194	0.9	0.9	1.5	143.186	136.512	127.996	117.789	108.494	98.2525	86.0348	74.5259	65.6831	62.2858	55.9601	50.7977	50.2036	50.3014	50.282	50.2288	50.2351	50.2784	50.2869	50.3235	50.356	89.5782	62.3751	49.8534	50.0261	50.8784	49.8948	49.9378	68.858	53.431	49.6277	49.9232	50.1316	50.1525	50.2257	50.2925	50.3334	50.2802	50.2966	50.2826	50.2713	50.2821	50.295	50.3528	50.3753	50.4149
[truncated: 434 more columns]

## Sheet: Outflow(WG inflow-With Demand)
grand_id	q1	q2	q3	1980-01	1980-02	1980-03	1980-04	1980-05	1980-06	1980-07	1980-08	1980-09	1980-10	1980-11	1980-12	1981-01	1981-02	1981-03	1981-04	1981-05	1981-06	1981-07	1981-08	1981-09	1981-10	1981-11	1981-12	1982-01	1982-02	1982-03	1982-04	1982-05	1982-06	1982-07	1982-08	1982-09	1982-10	1982-11	1982-12	1983-01	1983-02	1983-03	1983-04	1983-05	1983-06	1983-07	1983-08	1983-09	1983-10
610	0.7	0.9	4	1432.11	4583.12	3663.81	2124	3935.16	4905.39	2052.37	1500.26	1484.12	1556.25	1510.86	1555.91	1541.14	1378.83	1864.78	1614.59	1428.37	1316.6	1182.77	1002.62	955.595	987.012	954.864	986.427	986.391	1046.6	1652.49	1230.07	1105.87	1079.83	1064.62	994.975	949.662	980.387	948.338	985.394	991.456	970.539	2420.5	2006.42	1154.58	1082.35	1068.32	1035.85	1362.18	1464.94
1294	0.4	9	0.9	93.042	67.6923	72.6996	70.4023	81.5292	83.7233	69.0139	56.8135	60.017	84.3677	76.7211	119.511	102.428	101.219	162.593	194.031	168.085	270.854	267.258	167.401	152.18	156.999	173.938	157.49	148.688	136.531	148.338	122.252	112.51	108.397	101.357	97.3293	89.9396	89.4948	84.5957	91.5876	103.988	122.43	172.21	159.578	111.122	110.852	101.001	92.0012	82.6158	80.6745
1247	2	10	1	53.4428	66.4066	74.6274	60.4027	71.6697	83.8644	51.7097	37.1853	39.4333	365.097	114.301	268.767	163.126	94.2418	149.632	128.711	115.725	89.3782	93.6685	95.5553	87.5565	532.664	471.629	161.703	141.671	153.496	168.027	135.152	217.248	332.191	265.258	151.549	125.337	115.406	102.405	103.529	111.97	126.01	136.748	140.951	115.135	113.07	105.034	86.1633	76.4398	74.5689
1186	6	10	1	178.685	196.255	109.068	121.056	121.808	81.8359	63.9833	52.4529	43.398	42.3839	40.7279	42.4008	41.4338	36.3504	41.9974	42.2362	46.993	132.062	77.8232	54.7169	46.3941	43.72	47.6461	51.5544	48.0073	75.0757	80.6613	56.4079	53.0228	46.8548	40.7394	32.4954	26.3334	24.6369	24.2565	222.416	135.534	140.961	188.697	108.088	61.2567	57.7511	48.8019	37.8716	29.969	27.389
355	6	0.3	0.8	131.512	120.947	202.469	643.751	675.381	246.232	80.5728	55.1956	40.5111	36.0543	48.8911	62.5832	132.926	157.022	253.151	518.067	1143.66	221.267	81.5629	64.403	47.0329	35.6447	34.2908	51.841	56.0032	86.0094	210.022	379.391	600.017	358.156	83.881	62.6031	41.7517	35.4205	51.9749	146.574	278.117	311.712	359.107	892.849	1504.88	505.417	88.5533	63.9398	52.9269	95.2328
1302	6	1.5	0.9	18.8309	16.9813	18.0825	16.8975	16.5303	17.0764	15.5137	15.2806	19.9051	28.6242	23.6835	35.0455	28.8208	28.9434	52.7493	43.4594	40.8904	150.711	124.153	32.3036	22.5703	22.846	24.7717	22.4072	20.3621	18.6003	20.6872	17.9379	18.6862	19.3655	17.1668	17.769	16.1691	16.4969	16.021	18.0828	21.1301	25.4948	36.143	34.9147	19.1137	18.7841	18.7573	18.8249	16.8179	17.3704
1231	8	9	0.8	92.4063	116.747	62.4612	49.7269	49.443	44.1887	37.9679	30.9511	26.485	25.776	24.2489	24.9996	24.4565	21.6194	23.9749	23.968	28.2105	178.031	83.7405	43.9367	34.8271	35.3447	54.9578	57.4942	47.4762	46.953	53.2044	45.1072	45.0168	43.8102	40.927	34.2971	28.7819	27.1957	26.3967	262.116	74.7583	96.5632	98.7378	61.4302	51.4751	48.8831	44.5966	38.1498	32.9946	31.0115
1140	8	8	1	2.06595	1.87971	1.90307	1.59743	1.7151	1.49312	1.3573	1.58774	1.69658	2.06957	1.68728	2.88609	2.06001	1.63993	2.23305	1.78234	1.64038	1.51956	1.3381	1.53777	1.52038	1.61482	1.57823	1.6002	1.59432	1.43601	1.5818	1.52794	2.35723	4.69473	5.73361	1.37754	1.4307	1.54538	1.50298	1.57223	2.6298	12.8704	5.32602	2.45477	1.65005	1.40953	1.27767	1.23796	1.34116	71.9091
1296	0.9	5	4	76.7543	119.213	77.8207	63.2235	64.4577	63.5459	41.0329	7.0774	6.14801	5.56219	4.81013	3.51151	5.56452	9.98305	9.1298	6.19211	8.31352	70.3752	10.9925	4.12599	4.23156	11.1617	55.036	8.06353	12.2785	10.3944	12.3676	12.9028	46.7862	10.6277	6.92397	5.44986	6.45457	6.7515	8.05294	46.4445	24.3999	71.2123	65.2191	18.6631	73.2957	16.7016	5.47065	6.66377	7.46667	6.71443
1277	1.5	2	0.7	11.6577	12.3507	8.2193	4.23881	17.5841	7.8358	4.94491	4.44189	3.68776	3.72205	3.39608	7.15081	5.96615	6.35226	9.13072	9.91073	6.85382	30.0288	14.1082	5.95373	4.88889	4.49097	4.01767	3.90749	3.70182	3.71476	4.47311	4.44783	6.63879	6.25878	4.82558	4.17483	3.59365	3.48573	3.22994	3.67045	4.88673	7.21824	9.64517	8.96537	6.12864	5.50167	4.95291	4.39095	3.75325	3.57189
1280	1	0.1	3	80.2251	68.2573	71.8617	66.5857	61.1801	7.08735	6.71742	6.00938	87.7151	115.621	78.4915	147.005	124.271	82.3422	150.656	79.5022	86.6464	84.2848	89.8087	80.9705	70.1438	80.1782	89.3583	75.019	30.6944	32.7389	24.5818	17.449	29.5204	16.848	17.9783	7.25478	6.5159	6.70118	6.46883	6.69898	10.7313	29.4008	32.8938	11.5971	9.30354	6.98508	7.18596	6.58617	5.84323	6.0223
182	0.7	1	0.4	247.655	590.954	219.571	126.303	92.4809	89.2453	86.0012	79.6791	69.4592	93.6453	82.8763	79.2644	73.3545	99.6318	146.187	152.113	109.422	84.3568	30.526	26.3494	22.4298	21.6962	62.8936	191.619	110.353	473.816	408.012	488.086	159.073	93.043	95.7653	88.8421	79.3955	78.2722	181.182	459.627	395.371	510.561	695.356	290.288	149.093	101.19	95.0366	88.2823	79.6746	78.2893
1152	0.1	2	1	0	0	0	0	0	0	0	0	0	0	0	0	0	0	0	0	0	0	0	0	0	0	0	0	0	0	0	0	0	0	0	0	0	0	0	0	0	0	0	0	0	0	0	0	0	0
1295	8	0.6	0.1	25.3068	30.3649	37.3995	24.9964	34.4539	25.3493	24.2817	22.4279	18.6886	18.0353	17.2109	19.0679	19.6059	21.2097	21.2922	18.8364	21.0064	29.0064	28.6026	23.7301	19.8726	19.7047	45.3094	26.3511	33.9361	32.5572	35.5665	73.0335	80.71	29.6498	25.518	23.8906	20.9624	19.8811	84.0299	138.029	70.5928	142.786	118.201	31.9545	111.303	32.6727	23.9563	22.7381	21.0433	20.7365
629	6	1.5	0.1	2049.72	4301.53	3939.34	2154	3080.25	4852.94	2141.07	1747.33	1700.71	1773.8	1702.83	1706.62	1783.11	1550.78	1759.02	1657.73	1610.57	1571.35	1704.04	1593.41	1551.93	1617.91	1614.42	1623	1631.79	1489.84	1590.37	1569.77	1455.42	1482.73	1559.17	1422.05	1306.18	1328.66	1325.47	1503.75	1381.94	1283.62	1549.43	1283.26	1259.83	1152.57	1333.3	1538.93	1352.71	1483.86
1266	0.9	1.5	0.6	18.3879	26.4819	27.059	23.9835	28.0498	13.6802	8.94665	8.1566	7.06494	6.67046	5.9995	5.85612	5.57053	4.86977	5.51299	5.6481	5.94854	6.02763	7.26536	7.30209	6.56948	6.41677	6.23415	6.61745	6.65506	6.13501	7.10195	7.09265	8.56547	8.83116	8.28701	7.51085	6.49707	6.12654	5.5998	25.8209	14.7317	49.0824	69.008	34.2076	30.3287	31.9046	9.20887	10.5002	8.00103	7.24256
1176	0.6	0.1	0.1	2.63868	2.38007	2.62072	2.50102	2.66958	7.17576	21.0508	22.043	71.9404	56.7034	186.068	125.284	22.5556	20.354	46.1892	23.3336	22.9243	24.7135	29.8815	24.1704	21.7241	45.3659	21.8057	22.2929	22.0002	20.0496	22.1105	20.9938	92.9781	154.454	62.5326	49.0866	31.3059	23.1922	21.6725	22.1366	22.0526	69.1021	28.3156	22.4308	22.4648	24.1684	33.878	28.0563	22.13	116.972
758	1.5	9	1.5	94.9749	84.7429	88.5568	75.532	67.9684	65.4039	64.1163	82.4349	75.1899	66.1135	66.8777	63.2007	63.9485	60.485	63.9314	71.425	68.6115	55.0031	57.14	48.2552	53.5164	62.7027	61.257	53.5727	58.1052	47.5409	63.1092	57.3201	68.7114	67.0676	92.8294	63.6731	70.9386	93.4827	82.4193	76.676	80.3598	63.5478	78.0757	63.3149	67.2714	70.572	82.9657	59.9897	62.4587	73.2954
1242	6	1.5	0.8	22.8338	10.7028	11.6243	9.44484	9.02607	10.7076	9.91154	6.21705	27.3633	384.224	40.182	40.2735	49.9354	38.5459	36.1159	29.6284	24.055	15.9548	13.3361	17.1518	30.5364	25.4962	14.0053	13.7283	13.1699	13.4801	11.0832	8.22071	6.411	6.28438	1.55747	0.448872	0.356521	0.262658	0.254249	4.87054	65.878	86.4411	47.3703	21.6921	19.5025	8.6615	6.80631	0.648955	0.293599	2.54552
1236	3	0.8	1	5.5833	4.81332	5.43942	5.29552	5.36445	6.3297	6.44628	4.92757	3.4918	3.33794	3.10316	4.44926	6.95253	6.19217	7.75662	9.64255	9.72233	8.74933	8.56723	6.7416	5.01695	19.4394	20.8179	11.8772	10.8296	9.75756	11.7169	11.4507	10.9583	13.643	19.0518	12.7209	7.03996	6.6455	5.72695	4.80487	4.56987	5.14739	7.28485	9.23255	8.08831	5.24344	4.27706	3.5042	2.4894	2.31039
1194	1	1.5	0.7	22.8264	21.2441	24.0568	26.1458	33.155	32.2892	31.8786	27.7156	23.006	24.5267	15.6264	12.1306	12.6422	10.5887	11.5687	11.79	11.8408	11.3262	11.6355	10.4856	9.0236	59.6514	82.1044	25.9819	20.7045	29.2285	25.2347	18.9235	54.2611	68.8146	33.2772	19.0698	15.2149	13.6301	11.9769	11.5575	11.1713	9.91625	11.2392	11.2804	11.396	10.8654	10.7864	9.76645	8.53962	8.15446
[truncated: 434 more columns]

## Sheet: Storage(WG inflow-With Demand)
grand_id	q1	q2	q3	1980-01	1980-02	1980-03	1980-04	1980-05	1980-06	1980-07	1980-08	1980-09	1980-10	1980-11	1980-12	1981-01	1981-02	1981-03	1981-04	1981-05	1981-06	1981-07	1981-08	1981-09	1981-10	1981-11	1981-12	1982-01	1982-02	1982-03	1982-04	1982-05	1982-06	1982-07	1982-08	1982-09	1982-10	1982-11	1982-12	1983-01	1983-02	1983-03	1983-04	1983-05	1983-06	1983-07	1983-08	1983-09	1983-10
610	0.7	0.9	4	36346.6	36700	36700	36700	36700	36700	36700	36700	36700	36700	36700	36700	36700	36700	36700	36700	36700	36700	36683.2	36545	36434.6	36356.7	36298.7	36251.7	36222.4	36461.7	36700	36695.3	36553.8	36283.3	35994.5	35728.4	35550.1	35409	35305.5	35423.7	35832.2	36443.9	36700	36700	36673.7	36466.7	36247.9	36501.6	36700	36700
1294	0.4	9	0.9	1488.91	1440.35	1394.74	1352.67	1323.99	1288.31	1238.79	1184.24	1150.89	1133.32	1106.4	1121.08	1096.64	1093.07	1145.67	1187.35	1196.88	1382.61	1429.78	1420.34	1429.02	1445.88	1486.22	1489.9	1494.17	1504.77	1509.19	1487.16	1467.18	1443.21	1411	1377.53	1344.46	1313.24	1283.58	1261.7	1249.71	1273.18	1309.13	1319.34	1285.33	1273.4	1245.79	1215.6	1184.29	1154.67
1247	2	10	1	455.615	454.558	439.481	422.17	421.179	409.983	374.911	347.627	336.568	556.397	440.551	555.066	487.267	469.721	504.854	483.656	477.491	461.988	451.787	438.872	425.921	701.299	654.446	570.726	563.939	591.907	598.129	585.943	687.909	806.356	835.008	787.872	770.377	754.088	740.024	730.483	726.608	745.587	740.219	748.533	725.486	721.207	695.722	666.939	642.814	621.844
1186	6	10	1	822.593	906.288	858.493	897.254	903.424	873.408	839.428	802.249	767.651	743.893	722.205	702.224	678.322	657.192	639.51	620.525	610.95	678.266	630.142	602.186	582.634	566.822	561.151	547.269	531.095	551.476	535.492	516.307	504.437	488.6	468.484	445.823	422.784	406.991	397.306	552.486	502.533	562.227	583.286	555.613	526.684	515.837	495.155	470.532	447.675	428.706
355	6	0.3	0.8	1208.9	1212.75	1210.88	1209.37	1197.56	1180.46	1114.11	988.546	921.353	891.706	970.066	1119.84	1209.35	1213.06	1211.66	1205.44	1197.15	1201.49	1165.12	1043.57	957.905	919.929	907.994	992.489	1090.3	1170.92	1211.85	1209.59	1203	1193.56	1150.8	1029.1	952.708	926.513	1024.16	1181.9	1209.47	1208.7	1207.38	1200.71	1178.34	1170.77	1182.15	1082.7	1060.2	1157.28
1302	6	1.5	0.9	533.701	532.076	528.811	525.139	521.095	514.164	501.743	492.654	494.398	503.523	505.662	522.146	525.329	534.498	551.954	554.816	553.229	646.283	592.561	555.969	553.189	553.577	555.44	554.39	551.013	548.999	546.257	540.707	537.289	530.394	519.328	510.758	503.629	499.438	496.644	496.171	497.663	506.724	520.073	527.531	517.203	513.565	507.71	501.787	496.026	492.909
1231	8	9	0.8	483.781	495.584	488.696	491.279	492.442	482.396	462.78	443.776	426.982	413.096	399.973	388.802	376.59	365.634	355.728	345.515	342.445	468.116	440.447	427.037	417.807	414.446	440.262	450.334	450.773	462.583	469.644	468.715	468.696	466.563	458.628	444.36	428.946	415.137	405.788	466.04	433.828	458.759	495.213	499.528	499.354	503.579	498.065	486.635	473.84	459.744
1140	8	8	1	469.035	467.821	465.427	462.791	461.449	460.834	458.885	457.026	454.991	454.41	452.878	453.389	451.066	449.135	448.247	445.855	444.35	443.454	441.508	439.913	438.191	436.577	434.856	433.104	431.304	429.727	427.846	425.471	425.842	427.865	429.402	425.965	424.046	422.06	420.149	419.228	419.533	430.152	424.449	422.472	419.901	418.466	416.691	414.781	412.797	445.843
1296	0.9	5	4	492.556	418.409	339.221	285.828	240.259	186.312	143.841	126.368	126.333	126.484	126.464	126.507	126.502	126.231	126.214	126.297	126.25	128.463	118.175	121.138	125.609	126.929	126.525	123.722	125.851	126.006	126.052	126.222	127.208	124.109	126.071	126.204	126.32	126.429	126.467	125.822	125.612	125.589	125.271	123.476	128.349	116.715	120.638	125.1	126.317	126.307
1277	1.5	2	0.7	517.728	509.636	500.406	498.063	500.703	494.202	484.919	473.485	467.982	465.777	463.349	468.51	468.423	471.147	477.324	483.72	483.646	497.392	491.062	485.585	483.493	481.629	479.971	477.937	475.601	474.449	473.426	472.43	474.919	473.66	469.964	465.527	461.838	458.777	456.405	455.393	455.829	461.185	467.174	471.067	470.515	469.22	465.908	461.892	458.036	455.293
1280	1	0.1	3	1167.34	1091.93	1016.65	939.712	866.89	828.295	787.068	744.347	882.268	1209.33	1204.37	1210.91	1211.3	1211.23	1211.3	1208.74	1189.81	1145.09	1070.85	986.112	922.084	902.005	914.439	868.017	846.714	846.534	846.599	846.673	846.702	845.989	844.728	837.136	832.146	831.823	834.823	839.953	844.908	846.605	846.711	846.642	844.318	842.097	827.888	807.895	788.693	777.3
182	0.7	1	0.4	908.114	1092.58	1099.72	1100.15	1086.65	1018.21	928.372	853.131	796.171	731.948	661.754	601.912	545.274	562.235	595.401	635.117	571.56	481.455	411.615	381.025	369.316	363.585	421.545	650.19	1045.7	1100.83	1101.82	1102.63	1102.33	1087.9	1055.97	981.707	928.634	887.077	926.805	1099.46	1092.07	1101.3	1102.11	1101.78	1102.12	1096.55	1041.37	970.636	922.802	880.237
1152	0.1	2	1	0	0	0	0	0	0	0	0	0	0	0	0	0	0	0	0	0	0	0	0	0	0	0	0	0	0	0	0	0	0	0	0	0	0	0	0	0	0	0	0	0	0	0	0	0	0
1295	8	0.6	0.1	541.053	590.122	601.862	605.84	606.134	598.221	581.421	562.422	545.906	535.846	526.533	523.014	520.216	531.048	529.083	521.716	523.462	559.268	570.794	559.018	553.561	547.006	592.422	601.566	606.291	604.735	598.983	602.622	602.994	604.418	597.557	586.87	572.514	565.44	579.501	594.889	599.609	602.057	601.807	601.72	604.477	589.03	583.977	580.682	577.748	571.411
629	6	1.5	0.1	396.635	345.414	224.887	261.782	279.599	236.662	265.883	285.011	282.527	282.305	280.76	282.573	280.694	278.689	277.969	273.337	275.042	279.658	283.239	283.655	282.147	284.756	283.192	284.14	284.301	284.157	282.607	272.266	276.477	278.373	283.957	291.406	286.981	289.697	288.562	294.645	287.939	283.372	290.629	278.812	277.994	285.974	288.479	330.736	285.68	290.063
1266	0.9	1.5	0.6	307.556	306.168	294.511	285.216	279.629	274.275	272.837	271.327	269.59	269.006	268.237	267.848	265.941	264.676	263.637	261.655	260.967	262.097	262.308	259.69	260.226	260.8	262.033	262.147	262.101	262.761	263.47	265.041	269.705	271.361	270.749	268.476	265.534	263.684	263.721	275.322	274.742	298.554	296.155	279.576	283.215	277.93	273.617	274.579	274.572	274.311
1176	0.6	0.1	0.1	476.95	475.294	472.223	467.935	467.933	477.101	482.439	488.604	503.219	684.618	682.534	686.044	684.257	683.434	686.03	684.53	684.886	685.455	686.1	684.929	678.645	678.336	681.408	672.405	660.868	659.743	656.508	645.443	662.279	686.1	686.1	686.1	686.1	684.785	677.102	667.152	660.326	686.065	685.977	684.374	678.347	683.42	686.1	686.1	682.592	676.663
758	1.5	9	1.5	65.215	65.7422	65.721	65.6575	65.7523	66.975	66.7979	69.7184	68.5361	66.5031	65.999	66.3148	66.1622	65.9761	66.316	66.823	67.3763	73.4228	77.2241	71.5288	72.3711	83.7771	70.5704	66.5526	66.5689	66.5011	66.8251	69.391	71.004	66.6941	70.6202	66.0926	67.6516	75.1748	66.7049	65.8504	66.0078	66.0184	65.9069	66.1514	66.4968	70.8236	70.4834	66.7392	67.22	67.4023
1242	6	1.5	0.8	243.571	233.646	226.076	215.658	201.644	177.28	135.498	90.7444	103.319	359.176	236.73	251.028	254.458	254.599	254.686	254.666	247.549	219.986	183.89	160.701	165.051	157.631	152.415	150.063	147.869	147.197	141.575	134.573	124.956	97.5143	64.6387	62.6288	61.2803	60.9042	60.3182	62.9332	132.414	191.95	189.511	186.521	176.087	149.468	97.7585	63.0956	61.1687	61.5342
1236	3	0.8	1	201.465	197.981	194.458	190.162	185.492	175.289	155.844	136.314	126.107	122.761	120.06	118.967	118.263	116.637	116.211	116.143	113.376	108.435	97.0585	82.8117	75.1321	85.5084	83.1086	80.5274	79.503	79.3153	79.4632	78.8924	77.9527	77.5603	72.0576	58.8401	53.1884	53.2647	53.2843	53.3021	53.312	53.307	53.5349	53.6232	53.2008	53.2235	53.2429	53.27	53.3038	53.3383
1194	1	1.5	0.7	382.368	373.113	365.064	354.259	334.51	309.786	281.035	252.778	229.198	213.737	201.827	200.354	199.706	197.464	195.923	194.988	193.343	190.911	185.389	177.995	172.345	213.725	212.702	201.285	201.486	201.887	201.318	201.421	223.56	213.523	201.75	201.314	200.632	199.505	198.323	196.744	194.593	192.511	190.969	189.595	187.475	184.785	179.843	174.014	168.716	164.183
[truncated: 434 more columns]

## Sheet: Outflow(OBS inflow-No Demand)
grand_id	q1	q2	q3	1980-01	1980-02	1980-03	1980-04	1980-05	1980-06	1980-07	1980-08	1980-09	1980-10	1980-11	1980-12	1981-01	1981-02	1981-03	1981-04	1981-05	1981-06	1981-07	1981-08	1981-09	1981-10	1981-11	1981-12	1982-01	1982-02	1982-03	1982-04	1982-05	1982-06	1982-07	1982-08	1982-09	1982-10	1982-11	1982-12	1983-01	1983-02	1983-03	1983-04	1983-05	1983-06	1983-07	1983-08	1983-09	1983-10
753	1.5	0.9	0.1	1245.58	1171.67	1357.43	1357.15	1347.06	2128.14	1874.2	1402.64	1516.12	1797.22	1333.77	1243.86	1315.78	1200.46	1421.63	1214.1	1277.55	2934.61	2797.97	1416.87	1252.97	1327.01	1319.29	1339.77	1250.12	1309.58	2357.45	2716.81	1912.95	2860.07	3334.05	2744.41	1679.87	1926.34	1378.82	1325.57	1462.37	1728.36	2095.7	1331.31	1293.78	2243.22	2852.67	1529.03	1254.6	1291.42
870	1.5	0.9	0.3	1469.57	1994.28	2386.9	1605.05	1473.84	1454.58	1563.71	1580.09	1510.31	1590.89	1860.15	1879.5	1844.32	2041.73	1994.08	1439.4	1429.19	1520.95	2161.91	1894.71	1499.51	1474.36	1351.22	1476.38	1610.29	2431.55	3119.52	3010.25	2631.6	3142.73	2114.09	1605.94	1469.06	1698.01	2458.79	1919.81	1513.36	2085.66	3044.08	1853.5	1798.81	1431.83	1498.85	1568.59	1590.05	1467.28
597	0.5	0.7	0.1	559.439	507.433	566.346	585.485	3344.3	3413.77	967.185	562.833	543.782	559.35	540.802	558.55	557.015	499.344	550.377	527.022	552.184	550.902	555.503	538.373	522.348	548.916	524.869	533.646	524.185	480.034	550.803	533.352	595.803	1238.5	1218.04	785.756	718.651	864.953	790.941	767.111	626.633	635.307	1123.6	1181.38	3185.93	6450.97	4016.89	1399.35	596.141	791.862
307	0.8	0.5	1.5	333.975	287.506	334.467	389.948	346.512	687.4	728.927	553.264	429.388	321.859	382.593	319.245	400.493	379.477	504.64	341.484	532.883	887.353	715.517	552.812	496.476	506.608	493.485	512.978	499.783	500.206	634.211	603.397	607.154	767.997	758.352	581.718	525.193	540.634	520.881	536.65	537.542	492.89	562.619	527.61	567.265	593.159	628.163	582.553	523.551	521.443
1753	2	9	0.7	7065.89	3397.72	13794.5	6385.4	4487.3	2758.84	2256.8	2155.59	2790.26	1844.65	1861.69	2890.43	1674.8	2918.88	2264.55	2640.06	1463.15	1999.21	3010.26	2074.15	2028	1922.55	2401.63	3232.05	11447.9	8834.6	4763.39	2792.39	2129.73	1840.53	2821.39	3446.21	3298.89	2213.21	3990.28	10451.5	6769.65	4940.18	4897.83	7958.95	8640.84	4451.01	2519.53	2372.51	2064.92	1617.98
297	1.5	8	0.9	392.922	244.137	300.68	354.39	2400.97	2032.66	1111.59	650.922	498.728	478.856	408.16	374.928	481.66	317.215	364.194	408.281	1503.35	2379.46	2521.15	1168.95	632.398	502.065	423.448	380.336	317.354	300.968	417.226	378.153	840.215	3214.44	1793.42	883.822	626.036	581.142	474.011	419.858	422.813	356.129	425.584	431.066	1283.71	2125.11	1660.52	955.094	585.611	486.574
1036	1.5	0.7	0.5	185.352	180.459	274.78	301.732	267.574	262.067	329.167	256.952	218.121	176.088	178.863	176.946	152.78	140.35	123.73	114.204	129.406	133.585	132.163	141.443	118.317	114.481	123.566	124.578	222.863	430.888	384.705	309.401	227.998	281.778	340.404	268.817	251.859	215.325	213.715	835.731	591.619	386.751	535.85	821.058	945.359	535.593	470.109	351.004	299.294	242.349
989	7	2	0.9	68.1928	191.524	517.716	1159.8	556.409	248.55	167.962	170.647	130.726	95.6829	32.2768	48.4881	28.3712	41.1562	29.6567	52.5215	269.955	1409	1744.61	548.384	324.073	324.136	693.832	534.105	434.485	797.37	875.454	658.329	706.691	2580.63	901.342	558.503	518.319	313.295	219.14	836.016	730.229	477.26	556.761	3411.84	2475.39	941.977	488.728	268.856	233.438	278.221
1026	6	0.6	0.1	111.058	129.749	180.433	202.201	155.739	150.744	155.855	135.433	120.519	105.673	105.994	111.596	99.3359	87.7251	105.952	104.442	139.013	179.431	194.864	178.298	147.617	134.476	141.214	127.373	158.45	239.537	195.965	184.602	167.855	370.116	197.689	226.413	163.093	150.708	137.887	1031.68	207.92	389.581	334.223	705.027	597.476	235.768	363.749	175.371	159.478	150.189
1848	2	9	1.5	258.052	233.16	537.303	961.364	126.795	95.5957	60.8331	49.1058	60.7537	101.006	136.31	105.35	87.6992	151.315	158.107	210.286	125.936	180.876	104.21	48.322	89.2404	75.7099	55.2419	99.0256	285.095	266.8	201.858	392.962	108.435	136.462	79.5636	132.338	96.685	226.904	83.2138	739.368	802.95	422.277	344.952	706.803	628.833	251.573	61.3438	87.3408	55.225	85.997
1869	1.5	1.5	1.5	202.622	330.769	661.913	1128.58	433.619	96.2022	86.5711	17.5781	27.9837	109.826	59.7307	39.239	37.6572	125.693	100.604	92.6852	49.0178	76.7959	58.1539	20.7321	31.0515	35.2109	17.7957	24.5279	223.664	195.899	110.571	499.443	163.222	55.3238	59.3829	85.8606	89.4843	76.4203	61.9684	844.283	963.565	573.388	304.258	640.947	509.101	234.968	127.183	71.2051	50.2396	58.4216
7313	1.5	0.6	0.2	225.342	245.282	302.687	387.119	667.194	652.068	605.737	359.48	284.855	369.878	383.105	335.448	285.728	264.564	302.267	336.472	632.659	1006.63	562.948	487.102	175.861	295.811	355.403	313.594	247.745	318.589	363.656	437.546	670.029	854.469	806.565	549.574	508.923	539.743	432.906	349.498	364.488	300.978	394.948	406.44	534.877	684.643	665.397	569.163	342.142	509.969
1042	1	1.5	0.7	66.0963	70.1858	105.202	212.553	115.994	119.839	78.5877	58.9704	55.3556	55.5511	55.0436	56.9379	54.2683	51.7499	61.1524	68.9129	76.3205	78.0821	68.6362	57.6806	51.3601	48.7887	52.9446	51.1707	55.6218	156.104	113.382	89.3526	145.427	151.944	101.261	68.9904	58.4743	53.6182	57.0779	562.379	313.681	107.916	105.793	325.728	395.879	106.198	87.5766	63.0791	55.7327	59.696
884	0.4	0.1	0.1	1854.32	1304.32	1641.03	1539	2140.58	2021.56	2386.64	2751.26	2131.88	1935.48	1913.71	1152.54	1420.66	1349.19	1778.82	2507.98	2237.04	1798.47	2176.17	2324.58	1787.18	1518.11	1129.91	1257.66	1491.14	1083.9	1409.44	1722.2	1733.86	1192.93	1953.6	2348.49	2245.76	1770.68	1918.76	2049.04	2245.21	1582.46	1370.62	828.247	879.123	1594.12	1406.47	2729.58	2047.82	2063.04
1144	3	10	1.5	1262.3	1635.8	1100.25	1051.52	1245.22	865.043	569.1	428.956	384.488	1404.16	883.382	1365.19	810.472	841.017	1034.84	793.001	894.624	1976.98	955.696	748.697	621.214	1594.66	2371.05	1304.31	965.732	2478.58	1457.86	962.014	2059.28	3400.35	1588.91	1053.14	845.644	830.152	862.399	4252.35	1602.99	1791.02	2085.49	1327.18	1732.67	1238	1090.07	823.391	727.358	672.293
1006	0.8	1.5	0.8	26.5546	36.2773	68.5549	111.233	58.3367	36.0512	30.915	23.3521	21.6526	23.4663	23.9102	22.6684	20.1589	18.9461	24.3473	23.8344	38.5835	83.5977	119.933	44.8796	28.0666	31.1782	66.5607	47.6241	54.3621	94.9554	78.0566	56.1535	57.6723	95.1912	60.9401	43.3199	57.1148	36.5248	31.253	181.889	86.2364	49.4797	45.5687	226.015	317.271	83.6225	63.1099	37.2037	30.3478	74.3594
1048	1.5	5	0.1	265.814	247.03	425.357	1504.18	1104.35	1097.88	68.137	29.795	30.9243	29.4521	29.9804	78.6179	83.2609	79.7873	30.6185	30.066	260.921	369.663	262.089	172.944	152.697	216.984	720.188	136.556	149.631	399.286	516.362	128.868	2326.81	2166.53	938.246	177.947	31.3318	30.368	79.3351	84.6288	207.075	244.104	535.266	1586.2	1300.61	827.211	632.945	40.1896	82.6184	561
1032	8	1	0.2	20.6011	23.2761	122.5	389.677	231.606	106.169	22.4406	20.7579	21.2897	19.5925	18.5741	18.7603	17.6681	15.7163	18.0834	17.9572	24.4758	29.8921	42.5279	24.9257	30.4633	42.9998	154.064	44.6597	53.6773	195.552	199.452	93.2569	179.195	645.04	363.628	172.426	142.896	72.446	25.7447	123.178	136.171	269.088	269.316	877.994	567.252	271.212	201.933	120.37	20.8688	90.1269
355	2	0.6	0.7	142.251	155.125	194.625	173.553	259.083	420.843	316.453	139.24	233.007	198.988	195.356	175.731	172.764	147.183	152.777	114.731	297.258	597.07	242.536	123.211	115.938	126.707	154.897	187.393	150.641	178.217	236.873	156.307	165.832	434.68	483.895	221.468	236.954	375.284	268.292	259.884	280.963	262.738	242.023	187.3	289.264	584.149	686.058	196.116	228.012	302.432
1101	8	8	3	133.455	85.0546	362.292	816.764	82.6725	60.1403	54.7335	24.5625	36.3191	39.16	103.426	107.346	16.8024	119.856	71.9245	163.056	45.1906	259.099	68.953	37.659	78.3202	32.8351	20.2387	41.2498	135.353	242.785	136.874	184.045	80.1096	56.3838	48.9167	123.424	47.3586	47.5053	36.9866	498.889	491.499	162.345	214.699	341.498	277.258	268.912	26.5484	20.3935	15.6375	30.4257
1023	3	3	0.3	95.755	160.926	265.672	729.246	161.855	91.7205	44.3832	40.7957	40.4362	36.4554	34.7374	37.6312	36.1789	33.2624	37.6828	36.3824	60.8759	190.644	104.976	99.6559	58.7441	105.936	451.993	66.5519	71.6143	239.887	208.826	97.875	527.94	1078.21	195.553	72.5192	40.5566	39.057	36.8884	40.1046	42.9771	119.107	278.124	970.5	355.623	401.9	351.433	52.4043	38.7203	42.238
1864	1	9	1	89.9606	89.5048	105.547	181.144	95.4911	90.3808	91.1407	86.6327	79.3049	84.7895	81.1412	83.7743	151.482	477.833	74.3552	79.8612	55.9102	64.7539	52.9465	45.4777	44.4638	46.3891	49.171	42.2881	80.8289	83.1659	73.2271	105.485	112.75	59.7692	47.5015	63.7265	117.762	108.104	68.4298	485.826	294.328	153.535	166.037	188.328	303.134	159.337	75.6981	56.3255	76.9415	66.0598
1021	9	1	8	11.8735	17.7549	19.5869	58.6931	71.1799	113.412	54.7679	4.52021	4.03286	2.17478	1.94792	6.30154	6.03652	5.32142	7.85874	8.2268	29.847	40.705	12.2082	13.4577	44.4312	20.7499	153.073	27.8634	10.9557	15.106	28.778	17.0196	169.417	281.441	111.017	47.6628	4.40271	2.80568	3.77409	8.22407	7.4459	11.4157	28.2043	94.127	42.3562	143.351	72.2662	4.15235	8.86556	12.9507
1120	0.9	7	0.8	4.78557	4.91805	5.89543	6.08747	6.43936	12.3316	5.06585	3.79742	4.09417	5.23104	3.95588	4.69696	3.78329	3.49536	6.33818	5.72085	7.71112	19.5233	5.60879	6.15596	6.69787	11.3548	10.6588	3.95632	3.93973	6.54349	8.13043	7.71329	41.8328	65.7364	35.7412	10.0991	5.03412	4.83145	4.42998	6.0875	6.92931	8.39969	10.2339	7.80598	15.7771	16.9509	8.6892	4.65432	4.24378	108.819
182	0.6	0.7	0.1	1054.38	858.725	586.856	495.562	470.036	246.671	198.291	177.107	167.196	169.592	157.032	167.49	164.305	153.68	173.905	194.902	186.507	161.904	151.413	145.053	132.883	127.631	158.203	633.52	750.419	1055.81	893.059	1343.67	904.098	442.259	223.245	182.061	174.11	204.619	402.427	752.674	615.318	927.706	1488.43	843.967	983.802	899.68	448.9	224.375	179.929	188.633
7311	8	0.7	9	2.9155	6.12895	22.9521	99.3432	18.9345	7.03083	1.39964	1.40038	1.32689	1.00596	0.975788	1.40525	1.04639	0.932014	1.34897	1.87686	6.56213	21.3179	4.05627	2.00255	1.9285	3.09983	13.133	6.08795	3.08355	6.42269	19.8134	12.8519	23.1586	249.545	57.1455	4.59989	1.81611	0.488163	0.683532	4.55748	17.2999	40.7236	29.7976	151.357	66.5659	28.272	10.599	1.63665	0.950463	5.3504
1755	1.5	1.5	0.8	79.1357	83.5816	200.207	166.875	67.2206	54.7679	47.0961	40.5293	34.2449	31.0825	27.2898	33.6109	37.7892	121.884	101.389	71.8549	68.1902	233.626	70.9776	46.4004	39.5768	36.0163	34.8195	83.809	268.372	266.721	135.155	91.7417	82.0993	58.274	48.8101	43.1744	113.781	44.155	36.5743	118.24	124.412	160.463	81.5003	158.429	332.782	273.069	104.497	42.8819	33.0191	34.5228
1192	5	3	0.8	195.247	449.488	262.939	433.97	412.617	166.921	79.311	60.6141	56.1644	61.881	62.2355	78.8522	71.8007	69.3554	94.2759	83.0327	116.362	489.381	201.22	77.7712	68.9055	84.3628	96.7277	84.5408	82.2347	118.144	131.204	105.194	111.493	126.109	119.92	73.7819	63.2079	76.23	79.2405	361.728	230.593	460.787	372.373	258.796	128.527	127.869	129.04	98.2995	69.3749	66.6401
541	9	9	0.8	39.4002	34.5131	38.1444	58.2453	272.301	493.6	214.942	80.7925	57.749	55.4268	42.1052	41.2409	37.0383	31.0087	36.6507	37.12	53.0637	89.2741	73.4606	60.871	48.3787	43.044	36.8592	36.9681	36.3826	31.789	37.5862	54.5814	116.749	352.897	176.874	98.2095	87.8492	80.2476	56.8069	50.0875	44.7146	41.0399	49.4825	56.4928	164.626	477.885	337.137	135.083	80.1445	59.7034
1716	0.7	10	0.9	23.9714	26.9103	48.5905	46.5887	24.4275	19.5145	17.4463	15.3166	13.1861	12.6053	11.8353	15.9076	16.3645	31.2414	28.116	17.5167	32.7237	54.1407	21.3803	18.0756	15.7916	14.5752	13.4302	14.7526	43.6533	143.791	69.0242	31.6693	22.6396	21.8597	18.9337	16.2708	14.1913	14.0457	12.9947	158.887	68.9941	40.5837	33.504	88.9336	162.295	48.4707	25.0791	20.0177	17.7165	29.7021
1883	2	5	8	78.3445	66.0819	63.2133	93.0932	75.7256	48.5327	40.1754	38.2616	20.5328	14.648	45.7324	31.9276	39.8746	47.7364	56.1044	46.9446	59.414	125.509	43.5704	40.128	37.9583	47.2058	31.8913	49.7843	49.7823	50.2117	46.349	60.3634	51.4128	36.4961	23.5497	17.7931	13.6392	15.5061	10.3245	101.038	63.5712	169.449	84.9277	37.2025	62.3194	81.9796	42.3409	40.4662	47.9013	34.9689
895	0.5	0.6	0.1	1425.27	1063.01	1543.8	2103.87	2302.29	2145.88	2584.89	2694	2528.26	2652.62	2461.67	1211.87	1050.43	917.865	1641.38	2431.52	2472.12	2312.25	2529.48	2402.55	2455.96	2545.56	1376.63	1072.87	1107.95	968.364	1277.11	2095.09	2201.98	1947.34	2301.52	2377.7	2343.36	2595.93	2865.62	1982.94	1826.31	1494.02	1632.32	1199.4	1864.64	1587.95	2081.43	2636.2	2564.91	2670.82
1093	1	5	0.9	32.5016	38.2559	34.7491	62.8586	108.643	73.5457	27.6854	10.2452	4.60358	13.5107	25.3209	41.4961	18.0742	24.7456	80.795	43.1135	93.0666	345.49	60.0082	24.9238	5.89265	56.9822	98.4487	39.3841	47.9359	249.214	113.937	54.3114	248.149	288.475	21.9713	6.92254	1.0659	3.95912	8.30252	209.393	96.8498	59.6554	99.3422	74.2584	425.911	141.272	46.6408	3.99317	1.00542	2.33792
1709	0.9	1.5	0.8	117.969	129.799	323.64	307.786	179.436	86.7023	82.9657	84.3595	67.6656	43.2208	53.9753	107.645	66.2145	143.882	276.573	308.594	267.945	375.813	142.429	90.8472	87.4449	65.794	101.79	166.998	272.846	331.55	316.285	159.643	139.62	130.132	130.736	115.979	143.848	99.7608	93.0588	224.967	98.7274	120.037	243.427	286.435	257.101	120.53	99.5858	87.5552	29.5562	36.6703
1017	8	1	4	35.8886	56.6354	61.2869	78.1197	36.096	18.4256	10.5103	16.8574	15.5026	16.0609	19.5545	22.3097	14.8849	23.6675	22.3409	34.3059	120.225	66.1629	69.6199	34.7313	9.02658	18.9021	57.7883	31.2491	57.4533	227.497	55.6488	77.2699	42.6756	45.7337	20.8562	103.45	104.672	30.9414	34.6405	230.2	138.832	59.9348	52.4715	81.5923	303.883	77.2182	52.5481	44.0894	48.7395	135.002
[truncated: 434 more columns]

## Sheet: Storage(OBS inflow-No Demand)
grand_id	q1	q2	q3	1980-01	1980-02	1980-03	1980-04	1980-05	1980-06	1980-07	1980-08	1980-09	1980-10	1980-11	1980-12	1981-01	1981-02	1981-03	1981-04	1981-05	1981-06	1981-07	1981-08	1981-09	1981-10	1981-11	1981-12	1982-01	1982-02	1982-03	1982-04	1982-05	1982-06	1982-07	1982-08	1982-09	1982-10	1982-11	1982-12	1983-01	1983-02	1983-03	1983-04	1983-05	1983-06	1983-07	1983-08	1983-09	1983-10
753	1.5	0.9	0.1	20670.3	20663.7	20780.7	20939.4	20805.7	21094.4	21077.6	21034.4	21085.3	21097.6	21067.1	20821.9	20862.9	20883	21042.4	20692.8	20521	21636.1	21441.9	20990.8	20786	20779.5	20884.3	20928.1	20747.8	20890.3	21148.8	21251.9	21097.2	21711.8	22638.5	22042.4	21143.7	21097.7	21053.4	21046.5	21084.3	21106.6	21091.9	20950.3	20748.7	21117.6	21226.3	20960.4	20708.4	20636.9
870	1.5	0.9	0.3	20118.6	20306	20306.8	20241.6	19981.3	19930.1	19895.6	19943.2	19987.4	20123.8	20307.5	20274.2	20264.7	20305.3	20283.3	20079.4	19836.2	20041.2	20285.9	20289.1	20188.8	20079.7	19843.3	19922.8	20050.6	20322.2	20392	20606	20675.3	20868.7	20306.4	20205	20154.3	20250.2	20312.6	20296.5	20196.5	20303	20391.2	20304.3	20269.5	19995	19863.2	19849.4	20116.3	19945.5
597	0.5	0.7	0.1	24092.7	24180.2	24483.4	24653.6	25070	25069	25049.9	24714.2	24528.4	24327.8	24196.4	24112.1	24000.2	23800.6	23595	23282.4	23164.8	23482	23365.7	22942.1	22669.1	22636.8	22517.9	22307.2	22001.9	21854.6	21946.7	22006.2	23032.6	24684.2	25069.2	25052.3	25062.8	25069.7	25069.9	25067.5	25034.3	25069.1	25070	25070	25070	25070	25070	25070	25058.5	25070
307	0.8	0.5	1.5	16442.3	16416.7	16432.8	16469.8	16418.9	16905.7	17215.1	16869	16536.2	16432.9	16477.6	16432.3	16478.7	16479.3	16489	16446.8	16681.1	18324.5	18787.4	18422.9	17987.6	17681.6	17449	17238.6	16985.6	16962.3	17214.4	17355.3	17423.6	18586.1	19610.3	19462.3	19208.3	19050.3	18905.3	18781.3	18653.5	18554.1	18528.6	18363.9	18303.1	18386.9	18508.3	18348.7	18068.3	17821.9
1753	2	9	0.7	2326.15	2512.65	2183.28	1747.49	1817.06	1854.49	2320.78	2642.61	2807.19	2176.55	2512.59	2166.82	2106.98	2579.81	2669.95	2300.45	1880.35	2698.26	2413.96	2588.25	2874.98	2855.03	2664.41	2422.85	2192.28	1945.34	2001.7	2517.75	2625.76	2670.05	2553.35	2664.86	2187.37	2603.81	2612.78	2032.68	1434.94	2201.07	1946.4	1870.94	1919.22	1286.64	1472.13	2164.87	2428.65	2215.3
297	1.5	8	0.9	1959.23	1774.96	1671.9	1638.71	2628.53	2657.12	2346.91	2179.49	2063.89	1980.28	1868.81	1758.22	1760.59	1606.51	1542.52	1521.94	2174.19	2740.07	2664.42	2541.51	2332.32	2204.85	2078.83	1943.22	1788.31	1707.97	1670.74	1588.81	2022.52	2663.43	2662.3	2441.03	2348.29	2289.12	2169.69	2046.84	1956.11	1848.09	1793.87	1747.89	2196.76	2676.31	2715.62	2548.34	2385.47	2250.71
1036	1.5	0.7	0.5	2859.7	2824.67	2911.53	3035.82	3040.49	3083.07	3224.3	3177.13	3109.96	2981.33	2913.67	2823.77	2705.98	2663.34	2629.71	2590.23	2594.14	2609.84	2596.57	2614.44	2576.88	2537.15	2540.71	2526.19	2642.85	3168.71	3313.75	3393.55	3303.7	3413.39	3571.03	3545.71	3523.27	3415.89	3356.62	4422.51	4575.81	4601.55	4649.11	4783.14	4967.74	4691.07	4655.13	4644.19	4594.72	4416.6
989	7	2	0.9	639.728	720.447	879.527	1525.13	1164.47	1012	889.213	834.427	749.097	673.884	640.809	640.654	640.136	640.694	640.027	642.975	817.332	1612.25	2084.41	1646.85	1482.89	1441.81	1690.83	1599.85	1528.36	1974.32	2126.84	2050.08	2131.89	2598.02	2053.66	1987.92	1909.27	1713.74	1542.22	2072.33	2048.58	1994.8	1969.78	2929.31	2438.59	2233.83	1968.32	1720.45	1571.77	1496.74
1026	6	0.6	0.1	2043.86	2084.44	2189.84	2365.98	2358.99	2376.08	2378.09	2326.28	2258.32	2165	2108.7	2058.19	1980.49	1918.19	1878.77	1840.66	1882.65	2016.07	2136.59	2220.34	2224.26	2203.44	2225.44	2186.7	2244.83	2672.25	2740.99	2845.46	2847.42	2934.16	2944.32	2942.91	2925.4	2863.53	2795.17	2978.02	2955.81	2954.05	2951.15	2951.92	2953.23	2969.57	2957.74	2897.71	2884.11	2831.38
1848	2	9	1.5	406.004	372.709	557.499	476.091	363.326	369.231	369.494	369.863	371.263	374.378	395.974	372.736	370.233	380.004	370.818	384.613	381.461	384.044	372.902	371.524	375.882	373.179	370.084	372.542	416.046	374.496	369.363	387.896	366.72	375.364	369.393	377.262	369.943	416.145	376.266	614.974	487.25	388.954	379.152	518.072	476.844	375.767	369.766	380.053	378.773	372.295
1869	1.5	1.5	1.5	735.929	699.071	865.937	847.489	391.126	341.182	334.711	332.916	338.267	352.329	339.611	334.812	335.081	357.535	342.606	342.771	338.948	341.965	336.947	334.537	335.469	335.615	334.771	334.948	392.208	338.364	332.782	475.763	333.71	335.256	334.653	338.83	343.42	337.135	343.914	670.584	498.683	390.102	342.697	483.894	424.9	341.28	343.658	335.294	335.262	336.28
7313	1.5	0.6	0.2	1754.53	1759.02	1758.41	1764.82	1877.67	2179.17	2221.53	1817.62	1753.64	1758.37	1757.86	1757.6	1759.24	1758.08	1759.56	1758.91	1867.7	2484.89	2398.58	1956.76	1718.08	1746.12	1758.48	1758.89	1759.19	1759.38	1758.93	1757.08	1832.17	2268.08	2511.73	2219.18	1914.39	1794.88	1757.49	1758.68	1759.15	1758.56	1758.51	1760.4	1764.2	2005.29	2157.12	1894.5	1758.94	1757.02
1042	1	1.5	0.7	859.81	880.039	929.679	977.981	972.915	969.226	951.621	920.961	897.862	879.093	868.63	858.144	842.025	835.511	831.988	841.944	858.545	875.858	867.881	848.856	827.017	808.229	802.67	787.78	784.938	946.394	954.032	966.917	974.3	974.246	958.869	940.897	921.603	898.669	892.764	1255.59	1047.33	973.128	972.497	1053.71	1037.83	964.023	966.265	936.227	912.628	907.039
884	0.4	0.1	0.1	2342.64	2342.52	2340.08	2342.34	2343.23	2343.03	2343.6	2343.54	2343.6	2343.06	2342.32	2341.47	2323.65	2339.56	2343.39	2343.6	2343.55	2342.78	2343.6	2343.6	2343.22	2341.98	2335.09	2341.45	2342.68	2341.87	2342.47	2342.78	2341.31	2330.47	2343.54	2343.6	2343.14	2343.55	2343.6	2343.6	2343.6	2343.6	2342.97	2313.12	2336.9	2341.86	2333.12	2343.6	2343.6	2343.6
1144	3	10	1.5	227.546	211.848	194.221	198.756	200.81	201.132	207.673	216.448	217.134	380.969	203.416	246.418	203.765	205.796	200.576	206.46	204.697	398.713	189.61	206.942	210.086	426.414	454.95	188.175	204.737	349.956	183.527	198.159	424.889	249.481	176.076	194.505	204.056	204.785	210.48	422.321	162.508	223.055	208.46	188.2	189.793	189.521	197.7	204.994	206.813	210.942
1006	0.8	1.5	0.8	532.01	541.61	570.636	647.449	622.769	604.681	580.643	553.284	532.351	518.288	509.11	496.937	480.647	470.68	462.808	453.505	466.793	535.082	589.221	563.673	543.641	540.737	579.653	571.414	583.423	660.978	664.596	660.539	670.756	737.155	717.801	706.654	720.047	695.633	682.099	811.453	798.178	790.48	775.702	863.43	882.528	801.088	800.687	762.75	735.425	763.312
1048	1.5	5	0.1	791.739	787.766	786.07	750.832	741.723	745.176	713.511	737.269	783.979	791.36	812.624	797.042	797.771	811.805	791.107	812.855	799.587	788.827	789.014	789.917	790.4	790.266	773.173	779.531	790.77	790.276	774.97	781.72	788.199	664.452	720.374	764.592	790.349	803.582	792.334	793.078	798.265	786.806	783.276	740.824	725.61	750.034	759.965	792.601	806.753	785.973
1032	8	1	0.2	636.493	665.572	769.434	1039.59	907.384	790.293	739.14	707.82	695.58	673.508	655.387	639.966	618.356	600.878	590.696	583.842	613.988	673.561	750.613	744.485	757.678	755.595	786.707	763.725	768.459	817.233	809.339	766.563	849.815	1240.86	1213.93	1017.76	889.689	779.281	758.017	772.605	779.646	916.599	875.682	1227.69	1239.38	1106.36	992.875	827.874	754.697	777.839
355	2	0.6	0.7	1224.61	1224	1223.84	1222.95	1225.78	1221.22	1202.12	1178.44	1220.63	1223.16	1222.62	1223.71	1224.33	1223.48	1223.78	1224.62	1230.78	1308.62	1191.87	1129.35	1105.06	1152.32	1213.68	1222.98	1223.53	1222.93	1222.59	1222.86	1223.53	1241.36	1231.73	1214.34	1216.99	1220.95	1222.15	1222.49	1222.38	1222.59	1222.32	1223.3	1225.67	1272.25	1356.49	1219.27	1222.41	1222.92
1101	8	8	3	164.452	162.086	198.812	156.885	90.4146	151.601	163.494	166.918	168.257	166.714	174.802	158.576	159.323	166.327	162.818	168.653	160.284	168.063	157.269	166.37	165.064	161.441	168.428	168.244	166.932	163.007	159.735	162.34	157.213	166.779	167.15	176.058	163.17	167.89	167.354	200.448	150.889	149.717	162.938	165.59	164.673	132.116	148.861	166.191	168.961	169.008
1023	3	3	0.3	627.836	643.176	643.103	668.42	637.467	642.709	635.888	633.131	634.207	617.249	603.595	600.226	590.355	585.784	585.035	582.79	610.006	643.645	640.553	647.038	643.287	646.804	643.428	637.08	649.113	642.111	643.275	643.366	667.28	636.037	636.383	641.13	635.748	627.932	620.252	622.501	634.236	645.486	648.117	717.051	633.493	638.88	637.999	620.268	617.294	627.927
1864	1	9	1	1106.67	1119.8	1238.19	1472.37	1471.41	1423.71	1368.56	1297.51	1225.1	1186.79	1148.94	1115.88	1056.34	708.069	559.116	553.26	517.915	506.94	476.718	445.795	423.725	403.926	387.28	368.867	391.975	393.953	378.538	416.787	410.392	382.595	357.671	364.288	400.211	398.705	373.169	525.641	400.519	396.711	415.873	503.56	522.709	455.965	423.765	392.688	397.954	377.261
1021	9	1	8	70.5254	79.0149	83.6227	110.543	113.514	105.671	65.2492	47.0719	45.875	45.7531	45.2431	49.7703	48.7856	48.4673	52.7784	53.5361	78.6118	94.1638	85.5173	90.1101	106.155	98.9863	98.0215	62.0302	59.7122	71.7715	84.3697	80.6154	99.0308	55.2093	57.32	29.4953	21.3359	21.5382	22.9503	28.6781	30.4649	39.3639	58.2009	96.0058	83.1206	108.275	72.3258	46.9684	54.4817	61.1431
1120	0.9	7	0.8	326.878	325.192	322.187	318.622	316.521	319.094	307.382	299.321	294.49	291.89	288.146	286.373	282.235	278.872	278.923	276.408	276.281	289.225	277.254	275.427	274.426	280.719	279.938	275.261	272.117	273.305	273.757	271.231	323.761	373.32	381.827	368.03	361.025	355.95	351.448	350.116	348.541	350.757	350.684	348.203	357.551	361.137	353.444	343.658	336.138	374.264
182	0.6	0.7	0.1	1056.02	1102.7	1102.7	1102.7	1102.7	1102.3	1096.79	1056.49	1012.1	977.788	923.256	925.466	908.182	934.35	978.348	1089.69	1076.34	972.252	788.757	638.924	572.323	516.105	598.179	954.029	1102.7	1102.7	1102.7	1102.7	1102.7	1102.7	1100.89	1098.35	1091.8	1083.68	1102.65	1102.7	1102.7	1102.7	1102.7	1102.7	1102.7	1102.7	1102.7	1102.13	1101.37	1088.18
7311	8	0.7	9	35.9603	38.5702	50.299	64.6931	36.6422	31.5537	28.7135	28.3584	27.5189	26.8246	26.3111	26.1409	25.1169	24.517	24.2316	24.2521	28.0455	37.3689	28.77	28.7834	28.0252	29.0774	35.4784	31.4096	29.8302	32.9176	41.2424	35.0911	51.249	65.3829	9.52583	1.96307	0.820823	1.10443	1.73254	5.53393	11.9753	35.0205	27.1592	74.6659	48.5907	31.6512	28.452	23.8214	23.4714	27.202
1755	1.5	1.5	0.8	291.242	329.639	410.916	393.499	365.559	354.747	337.507	316.646	295.482	274.81	256.958	249.268	242.239	357.566	361.145	367.833	366.802	450.616	363.078	342.235	323.632	303.814	290.41	340.914	430.275	421.139	386.394	394.36	391.909	378.239	358.364	339.656	386.481	340.771	320.331	378.979	387.999	409.208	381.247	410.878	582.281	582.595	454.27	389.811	357.898	336.101
1192	5	3	0.8	252.824	348.723	324.983	353.037	347.547	284.632	231.581	199.504	177.805	169.365	164.103	169.353	159.217	162.243	174.172	169.65	214.619	349.435	294.447	231.216	213.732	217.513	224.565	211.453	205.275	255.602	261.211	254.119	262.008	279.965	276.562	232.095	207.119	201.569	202.737	332.195	327.664	353.187	349.322	327.072	295.565	307.413	318.784	281.625	244.753	219.751
541	9	9	0.8	187.967	185.264	182.608	205.451	319.316	314.648	274.008	226.958	216.641	213.013	204.121	200.309	192.761	185.907	182.884	180.807	189.918	232.484	221.546	214.191	202.235	193.574	187.678	183.785	181.702	177.233	176.549	192.433	268.351	336.933	304.427	300.325	323.442	334.669	323.945	313.764	300.728	291.892	289.436	294.348	329.325	327.48	280.775	278.412	268.846	260.767
1716	0.7	10	0.9	200.925	208	234.356	246.208	233.252	224.609	216.163	205.073	195.913	189.621	186.688	189.01	184.02	202.366	195.78	189.618	210.067	237.785	219.512	213.005	206.181	198.448	195.208	193.848	227.774	272.831	243.468	234.68	225.699	226.26	218.273	206.723	201.528	197.845	192.793	271.089	252.372	260.158	259.113	276.851	280.985	270.114	252.533	237.599	226.483	244.034
1883	2	5	8	66.5755	60.4989	63.5298	56.6511	45.8882	40.4608	51.7475	59.588	53.1062	57.7126	67.2102	66.055	66.7546	67.8009	65.6913	64.8321	63.0414	40.2868	25.2129	42.6754	53.2855	61.2544	69.0607	65.5733	66.744	67.7426	67.1296	66.9496	65.7037	63.7724	56.9699	62.5291	62.2355	64.5638	66.1389	68.9609	55.671	58.0083	32.5801	38.4747	55.2728	51.0466	51.2496	61.7657	66.8062	68.345
895	0.5	0.6	0.1	665.216	665.712	665.273	666.1	666.1	666.1	666.1	666.1	666.1	666.1	666.1	665.914	661.596	644.007	653.306	666.1	666.1	666.1	666.1	666.1	666.1	666.1	666.1	665.29	663.949	655.999	600.81	666.1	666.1	665.546	666.1	666.1	666.1	666.1	666.1	666.1	666.1	666.1	665.396	658.922	666.1	659.241	656.789	666.1	666.1	666.1
1093	1	5	0.9	57.7272	66.2233	57.2757	79.4079	122.845	104.48	76.7612	60.6483	53.1418	57.8049	57.4565	71.6285	53.7153	62.7002	93.1905	73.0252	123.171	145.284	53.8007	53.4352	52.4421	103.166	122.077	95.9798	87.5731	189.61	154.023	123.43	160.751	127.256	52.4647	52.5992	51.9845	52.3558	54.4747	172.037	139.19	135.272	165.45	165.008	187.512	87.8595	66.5557	52.1572	52.1336	52.1836
1709	0.9	1.5	0.8	166.764	181.513	224.345	199.958	176.337	153.952	160.376	157.132	141.45	116.527	116.438	157.638	130.635	189.032	218.336	213.43	201.331	298.671	174.069	177.096	175.272	155.118	187.675	213.227	217.697	263.927	296.696	411.603	369.632	453.112	450.206	389.43	288.157	204.482	193.276	213.409	169.556	193.961	211.306	208.812	196.319	177.744	164.508	152.662	108.859	100.601
1017	8	1	4	48.6396	48.4107	46.2405	44.36	47.4742	48.2081	49.5355	49.6085	49.4242	49.3183	49.2248	49.1407	49.246	49.1891	48.8448	48.7445	48.4785	46.7072	46.0291	41.1366	44.3284	49.0409	48.7392	47.7254	48.1817	44.9036	35.9311	45.8906	47.557	47.4426	47.8164	50.9903	36.9311	42.0783	48.2131	228.811	267.446	235.207	213.584	251.849	343.684	302.22	268.765	238.139	210.368	130.096
[truncated: 434 more columns]
