# Supplementary material for: The value of observed reservoir storage anomalies for improving the simulation of reservoir dynamics in large-scale hydrological models
Source: Copernicus journal article supplement (doi:10.5194/hess-29-4073-2025), 2025-09-03
Supplement: Supplementary file 14 [file WA_results_calibrated_against_storage_anomaly.xlsx]

## Sheet: Readme
	Sheet name	Note	Inflow source	Total number of reservoirs	Number of reservoirs where downstream demand is taken into account
	Outflow(WG inflow-No Demand)	Simulated outflow (×106 m3/month) where downstream demand is not considered for irrigation and supply reservoirs.	WaterGAP	100	0
	Storage(WG inflow-No Demand)	Simulated storage (×106 m3) where downstream demand is not considered for irrigation and supply reservoirs.	WaterGAP	100	0
	Outflow(WG inflow-With Demand)	Simulated outflow (×106 m3/month) where downstream demand is considered for irrigation and supply reservoirs.	WaterGAP	21	21
	Storage(WG inflow-With Demand)	Simulated storage (×106 m3) where downstream demand is considered for irrigation and supply reservoirs.	WaterGAP	21	21
	Outflow(OBS inflow-No Demand)	Simulated outflow (×106 m3/month) where downstream demand is not considered for irrigation reservoirs.	Observed	35	0
	Storage(OBS inflow-No Demand)	Simulated storage (×106 m3) where downstream demand is not considered for irrigation reservoirs.	Observed	35	0

## Sheet: Outflow(WG inflow-No Demand)
grand_id	q1	q2	q3	1980-01	1980-02	1980-03	1980-04	1980-05	1980-06	1980-07	1980-08	1980-09	1980-10	1980-11	1980-12	1981-01	1981-02	1981-03	1981-04	1981-05	1981-06	1981-07	1981-08	1981-09	1981-10	1981-11	1981-12	1982-01	1982-02	1982-03	1982-04	1982-05	1982-06	1982-07	1982-08	1982-09	1982-10	1982-11	1982-12	1983-01	1983-02	1983-03	1983-04	1983-05	1983-06	1983-07	1983-08	1983-09	1983-10
610	1.5	0.8	0.9	2254.87	2161.13	2403.53	2168.5	3890.66	4905.99	2391.71	2194.29	2129.97	2209.3	2145.05	2223.15	2229.59	2019.36	2268.84	2258.23	2269.52	2189.1	2238.8	2092.3	1890.4	1087.32	1050.77	1084.29	1086.87	1049.26	1594.97	1314.22	1119.21	1056.88	1081.45	1062.66	1026.32	1058.73	1025.69	1117.89	1199.84	1140.12	1622.35	2041.45	1228.61	1073.17	1101.94	1199.54	1183.88	1421.36
753	1.5	0.9	0.9	1478.18	1376.12	1537.64	2143.22	2720.69	2138.32	1572.04	1331.71	1255	1339.18	1316.35	1377.73	1419.16	1278.41	1435.92	1444.71	1570.89	2659.34	1616.73	1362.98	1252.37	1320.22	1318.4	1343.02	1376.52	1253.13	1452.16	2272.64	3604.65	3197.65	3052.4	1531.93	1381.99	1558.75	1839.69	2004.14	2368.19	1872.68	2386.1	2379.34	2890.94	3253.67	1905.61	1403.32	1299.16	1386.07
870	1	0.7	0.1	2129.8	1933.65	2140.08	2074.15	2143.4	2067.39	2130.2	2113.34	2040.49	2106.84	2044	2114.21	2116.74	1912.47	2126.33	2050.15	2113.81	2041.99	2098.74	2048.04	1959.92	2015.38	1942.38	2000.72	1993.78	1795.33	2000.93	2308.85	2498.58	2211.3	2194.13	2166.39	2080.89	2145.5	2086.9	2149.1	2143.44	1931.46	2141.66	2083.42	2143.55	2062.48	2127.34	2127.99	2057.83	2124.54
597	0.5	0.9	0.9	1034.04	2760.22	3108.63	3599.92	6398.19	3648.5	884.412	654.945	629.139	653.582	636.329	658.425	658.612	593.563	653.474	633.688	1477	1027.22	654.262	633.006	591.239	599.697	592.997	619.809	616.249	552.54	650.499	663.412	1324.63	2137.67	722.989	650.498	623.182	648.629	633.544	658.004	659.064	1021.37	2870.65	2526.59	4198.83	4225.24	1376.41	660.2	637.451	696.509
307	0.8	0.5	0.8	316.277	274.042	323.485	363.467	409.784	388.693	379.935	280.45	277.373	311.444	316.496	330.865	333.307	301.039	364.824	423.598	518.987	700.309	411.092	331.307	311.055	334.78	344.653	358.832	356.966	323.623	552.944	846.057	861.64	800.795	697.096	602.306	567.706	591.233	583.254	602.232	608.258	549.795	610.153	597.966	615.2	592.476	578.08	546.263	510.277	552.342
1753	4	2	0.5	9173.39	9164.11	17911.2	12934.9	5403.3	3478.11	2458.88	2045.24	1705.01	1918.89	1797.92	2341.26	2465.52	7348.37	5960.66	5404.02	2725.13	2644.59	1888.69	1390.99	1234.61	1121.59	984.599	1232.27	10879.8	13959.8	9266.52	5759.31	3501.7	2407.08	2247.75	1948.86	1878.49	1554.83	1574.64	11098	10668.9	10088.8	7394.71	12107.2	10424.2	5657.79	2651.98	1914.54	1709.44	1522.87
297	4	10	1	516.159	230.887	338.135	658.729	2599.96	1957.76	1049.95	784.669	843.602	712.826	654.73	522.638	697.847	559.172	642.952	641.099	1474.4	2619.6	2326.07	1128.97	615.926	691.704	510.201	470.483	348.113	300.441	458.47	437.796	1177.65	1782.76	1473.08	709.74	799.25	884.162	578.915	450.047	445.629	369.532	539.833	591.414	1197.6	1456.59	1373.17	881.696	672.62	511.663
1036	0.9	0.5	0.1	255.214	454.04	520.409	510.73	493.874	302.362	237.518	234.064	224.091	229.755	221.82	236.211	232.061	217.654	241.996	228.741	239.248	236.811	238.003	230.881	220.874	227.095	238.725	238.492	254.9	510.529	503.605	310.747	236.157	388.067	471.178	465.448	432.192	447.981	449.816	643.568	552.149	477.204	521.268	512.11	544.587	507.815	518.027	514.613	494.736	509.224
989	2	0.7	0.1	427.133	442.505	711.103	732.019	590.733	517.099	491.791	453.953	417.008	402.486	375.592	403.566	398.31	354.357	447.908	390.113	437.807	787.865	1081.34	599.112	532.488	518.446	836.8	760.128	740.642	1632.81	841.303	627.259	867.228	1338	733.975	649.874	597.014	533.767	494.445	1165.62	666.334	798.194	803.796	2106.48	2150.79	1147.73	581.356	540.915	491.522	519.57
1135	0.5	1.5	0.7	235.78	173.518	204.491	172.693	189.881	276.587	186.601	145.384	134.134	326.092	215.815	323.578	248.796	173.277	296.168	248.335	237.136	293.765	244.974	204.557	181.849	1026.3	1024.87	359.074	295.361	597.299	459.233	311.031	796.9	1743.29	1245.17	457.311	329.323	289.568	255.343	273.908	329.013	783.283	673.31	531.412	569.047	409.613	300.374	245.32	210.92	526.581
1269	7	9	1	447.494	744.96	632.081	715.525	995.292	608.418	391.218	317.383	263.78	246.67	229.339	231.708	224.747	211.452	264.041	244.808	234.294	374.925	390.189	250.671	211.614	202.683	199.215	218.717	215.267	295.786	337.861	351.589	576.077	353.207	272.096	232.038	194.92	185.191	192.231	791.564	1153.97	755.283	985.901	656.593	665.49	608.599	443.807	359.513	301.543	279.39
1077	4	1.5	0.8	193.138	243.087	301.627	261.36	371.177	527.046	294.4	234.005	197.536	185.006	164.065	180.367	165.272	141.843	204.258	194.959	171.138	209.295	199.455	161.931	152.312	214.999	545.962	404.193	280.155	839.99	501.753	345.521	755.726	1572.68	746.216	374.421	308.09	279.214	239.776	301.951	345.764	760.828	742.31	715.652	768.588	647.909	387.187	300.359	250.628	510.986
1026	0.6	1.5	0.9	223.829	283.803	364.361	355.336	236.535	203.894	208.007	156.517	137.862	132.07	134.132	246.932	178.839	220.848	264.844	191.059	239.59	349.508	266.62	207.778	198.957	175.292	383.214	235.366	256.053	725.414	471.666	212.873	178.44	181.765	189.279	165.871	201.533	143.617	146.858	1286.28	424.799	323.885	256.25	334.236	711.721	291.288	224.63	201.124	177.737	211.837
740	9	2	2	16.8223	18.54	20.9487	19.6031	17.5041	13.6338	11.7024	10.3675	10.3278	11.4406	11.7319	12.9694	13.3955	12.1431	13.2317	12.4036	12.0247	11.0893	11.8598	11.2045	10.4567	11.4276	12.0838	13.1513	14.0591	13.6261	15.3711	14.8346	14.5068	13.6409	13.4357	12.8491	11.707	13.1631	14.9615	16.8335	17.4884	15.9667	17.9128	17.3821	16.032	13.5223	13.2295	11.6705	11.3236	13.0442
1294	0.4	1.5	0.8	57.2844	48.3985	71.6796	187.803	195.038	187.055	169.421	149.31	145.039	172.23	156.574	211.974	122.849	99.3309	249.257	201.616	177.54	420.14	332.046	177.332	155.094	199.28	189.851	159.863	158.662	148.131	143.294	113.148	101.449	97.8461	92.1711	88.9176	82.6756	82.6653	78.414	84.6551	95.2021	109.92	152.232	141.447	102.126	101.616	94.0473	86.7996	78.8713	77.7224
1848	1	1	0.1	151.599	142.56	175.676	244.006	149.57	139.962	139.353	133.693	123.85	123.419	133.031	160.585	131.621	144.016	146.573	148.641	127.075	126.354	123.244	113.449	104.302	102.918	96.2306	103.069	183.534	179.363	164.451	178.271	144.951	109.836	106.227	101.045	93.8671	93.0717	96.6043	285.897	238.612	159.474	161.259	160.241	159.401	147.058	144.445	138.9	128.948	128.357
1869	2	1.5	0.7	302.385	525.564	667.524	926.573	471.01	263.012	227.645	135.682	74.8593	74.0263	71.596	82.2788	85.351	111.21	174.152	139.966	101.637	82.684	74.7537	65.743	58.0183	56.4057	52.0848	51.7128	85.9701	206.089	191.639	427.212	479.107	102.729	84.9651	74.3713	66.3896	64.3185	59.8846	943.502	977.129	659.245	557.001	709.812	607.955	553.471	292.909	248.8	202.993	187.11
1863	1	1	0.1	113.419	105.524	569.521	123.037	107.835	104.201	106.177	103.575	97.4453	99.4183	97.7361	100.411	96.9855	103.805	112.61	99.8912	96.6969	91.3104	90.096	86.3739	80.3152	79.53	74.2765	77.5746	157.366	140.776	126.415	102.702	110.546	94.9677	94.4629	91.2337	84.7504	85.6135	85.6183	130.952	131.743	114.917	118.311	112.332	107.904	101.855	102.177	99.0001	93.1231	93.3001
1770	0.8	0.1	0.1	96.4344	93.3586	265.471	137.923	94.8747	91.0951	92.6397	90.6914	85.7166	86.2979	81.3437	82.9342	83.7131	88.2367	102.06	90.8122	92.0041	88.4934	89.1939	84.9489	79.9822	80.2527	76.5527	90.5806	111.179	94.7956	219.214	93.5414	94.4345	90.2675	91.5528	89.6488	84.9281	85.4377	81.0313	100.018	99.3498	86.4245	101.764	136.737	187.544	92.582	93.873	92.2047	87.3707	88.2072
965	2	0.2	0.1	124.798	100.174	222.226	362.623	243.046	74.9683	16.9647	15.0185	14.5798	14.8909	14.7104	19.6923	19.8762	18.14	39.2633	30.298	86.3752	17.1396	14.3155	15.4903	24.8711	15.3293	23.7552	74.139	39.7667	124.13	295.767	189.258	264.637	330.964	212.281	72.077	59.6459	47.6957	40.4307	40.4579	73.3441	133.099	153.098	361.004	261.755	234.677	238.254	117.612	24.921	34.2893
1247	6	8	1	139.397	72.2173	80.7172	67.0908	77.5086	87.6561	57.9809	44.4451	45.9842	346.577	115.928	257.24	160.962	97.0034	148.695	129.207	117.673	93.0271	96.7634	98.5365	90.9935	706.713	473.977	162.223	142.055	154.028	168.616	135.519	218.258	334.134	266.08	151.323	125.171	115.596	102.571	103.671	112.189	126.46	137.215	141.361	115.198	112.713	104.373	85.7089	76.2344	74.4194
7313	9	0.6	1	225.38	314.996	493.202	813.492	791.295	1254.41	300.607	179.052	163.541	217.483	219.643	230.274	234.453	316.3	518.741	659.379	1466.97	832.852	284.22	166.308	130.259	155.797	194.911	223.421	238.787	338.59	1154.59	1596.89	1595.59	1211.39	324.293	207.143	178.218	232.292	236.388	361.356	628.676	359.772	1223.83	858.778	802.968	580.702	264.236	209.099	185.257	214.737
1287	0.8	9	0.9	469.863	627.514	572.697	474.32	489.298	466.896	383.656	314.261	258.481	371.72	335.737	308.024	314.407	235.231	300.015	324.882	320.287	1054.83	810.371	452.383	375.734	1017.29	1024.33	650.414	468.021	511.357	553.302	474.661	1099.81	1258.69	598.482	474.761	393.286	364.702	339.596	709.723	702.395	1268.96	1011.54	740.532	786.165	629.623	478.733	403.198	353.932	320.858
1186	1	3	0.7	139.38	206.531	76.2185	155.704	109.132	57.8591	46.368	39.2108	33.3485	33.0216	31.9107	33.3183	32.8133	29.0617	33.3884	33.4077	36.7543	89.0211	56.3897	42.6587	37.4646	36.2808	38.3858	41.1628	39.1664	54.0052	58.5442	44.3622	42.9226	39.0483	35.9802	31.2449	27.1673	26.4496	25.7272	190.695	89.0116	230.756	156.178	73.5275	48.3487	46.0268	41.6818	35.6702	30.7105	29.5878
1042	1.5	0.5	0.1	22.3435	26.0617	30.4137	29.2584	24.4046	21.5486	21.2173	20.3434	18.9995	19.092	18.1375	18.9815	18.7411	19.4303	22.2596	20.9912	21.5418	24.1539	21.2938	19.438	18.1051	18.4487	19.5042	19.6826	25.0092	48.9428	39.131	22.9135	22.2485	22.7311	22.4704	20.8745	19.6177	19.7542	19.9838	194.575	125.312	68.811	35.9975	86.0846	102.439	28.3858	24.321	23.1056	21.5163	23.0818
884	10	1.5	0.8	2809.34	2494.32	2801.44	2737.93	2745.59	2736.66	2744.85	2161.78	2084.47	2187.54	2084.49	2139.55	2188.03	1926.59	2187.94	2085.87	2188.44	2085.18	2139.86	1927.02	1858.58	1954.8	1858.16	1954.8	1909.57	1756.05	1960.86	1927.28	1966.29	1883.42	1968.04	2253.35	2194.92	2251.42	2194.85	2300.39	2250.46	2030.15	2300.26	2203.67	2263.1	2200.73	2254.29	2458.26	2347.13	2405.44
1273	4	1	1.5	18.7884	30.7736	21.6786	18.6428	43.6802	27.7156	3.06353	0.975195	1.21115	5.60949	7.48633	69.6297	22.5703	25.7918	64.7947	38.3098	26.5378	63.5148	22.3081	12.8637	8.52393	78.3458	47.1678	33.7309	33.6071	56.4309	68.9432	54.5291	159.697	90.0142	52.3049	34.7659	24.1262	20.5444	18.2014	20.548	33.1809	49.5417	65.1428	41.2075	34.4206	23.2634	14.5476	10.4207	6.12759	7.71543
961	0.1	1.5	0.4	0	0	0	0	0	0	0	0	0	0	0	0	0	0	0	0	0	0	0	0	0	0	0	0	0	0	0	0	0	0	0	0	0	0	0	0	1.47811	1.61971	1.95682	49.3658	33.7286	20.1587	13.1892	9.67796	7.64157	7.02173
1144	8	1.5	0.2	1262.62	1583.65	1172.57	1040.92	1219.11	873.371	546.262	387.759	437.463	1405.52	833.278	1354.81	833.591	817.29	1044.6	791.235	905.904	1913.47	972.297	774.544	569.624	1888.12	2072.11	1322.29	961.825	2455.8	1451.95	990.508	1800.79	3561.36	1626.55	1048.91	870.233	827.621	852.582	4090.93	1754.28	1809.77	1990.43	1362.73	1779.97	1182.8	1069.06	865.717	693.758	674.504
616	9	7	0.8	1603.16	4047.38	4440.22	1930.73	3435.97	4884.63	2190.93	1394.24	1563.25	1602.35	1557.21	1919	1604.16	1475.95	1920.69	1562.82	1602.11	1557.49	1595.96	1573.53	1792.66	1530.59	1489.8	1528.97	1837.93	1414.11	1532.99	1491.4	1530.03	1489.37	1526.45	1464.98	1311.37	1341.16	1307.68	1343.15	1074.87	1239.73	1343.83	1308.83	1342.64	1038.16	1339.48	1336.77	1299.75	1334.87
911	1.5	0.6	0.6	299.921	326.93	585.132	649.084	387.619	408.839	318.775	290.103	270.078	262.979	238.702	233.722	224.218	193.274	227.106	201.291	195.923	170.956	176	172.286	151.028	143.05	138.278	166.522	155.074	184.581	735.893	934.217	926.988	1050.41	754.524	473.624	416.735	436.347	614.001	1065.81	760.322	751.788	2037.35	2400.67	1373.9	998.527	1088.18	956.021	725.364	484.424
1006	1.5	0.5	0.1	22.5468	26.8867	33.1983	31.549	26.217	23.5098	23.0742	22.0322	20.5496	20.6606	20.1432	22.237	21.0512	21.8732	26.0079	22.1506	26.6379	35.4922	33.4747	25.4861	23.3297	24.6155	36.5108	44.7311	46.2602	117.975	94.2374	27.8706	25.4334	51.0249	25.8346	36.5505	43.7626	24.0319	23.4546	141.83	86.6405	40.3724	26.4335	112.244	129.154	66.6184	27.7091	24.6875	22.9259	64.442
1048	5	2	1	401.502	505.65	854.54	1483.7	1410.33	1187.12	787.696	576.632	484.869	450.457	404.648	395.124	363.342	295.39	334.054	296.328	257.205	283.218	198.004	175.822	154.297	168.403	372.861	461.378	288.671	601.403	738.423	501.327	603.902	1400.69	869.213	599.199	486.726	428.38	359.312	352.737	323.275	417.167	582.755	1092.63	801.428	863.508	758.182	620.955	532.397	564.522
1123	1.5	0.1	0.1	52.9318	83.1279	41.5633	32.8563	43.1564	17.3287	4.93665	4.78217	12.8483	104.807	38.4271	64.2967	26.4287	47.5053	46.5061	27.4962	59.165	96.038	30.5064	16.5885	9.21196	22.1045	18.304	28.5188	45.9567	112.433	95.8304	33.1611	84.2624	121.158	72.7148	17.1197	13.8952	13.5916	21.8945	132.659	107.475	80.2095	100.118	50.829	119.598	89.2668	24.8114	9.59639	6.88548	13.2911
1032	3	5	1	129.09	202.988	306.394	410.623	265.458	187.693	99.7011	85.6763	72.5199	67.8545	51.5796	56.1104	43.4389	48.9795	75.9805	65.685	96.6644	167.468	96.9816	69.7736	53.1734	68.3854	217.24	205.864	136.371	285.087	249.566	144.94	229.589	580.324	328.943	215.9	173.842	148.55	121.616	147.783	249.652	325.181	356.675	528.587	424.471	357.627	255.374	198.789	159.939	196.235
1774	6	10	0.9	478.13	427.229	1162.14	574.564	342.931	244.253	200.566	175.737	151.866	142.084	126.12	123.013	117.952	169.331	325.084	325.93	275.901	289.786	211.937	161.99	135.122	122.943	108.556	112.627	260.055	1220.42	843.316	416.49	248.413	198.126	183.562	162.393	184.593	159.179	177.386	340.847	394.853	875.332	467.658	587.679	539.798	329.687	225.506	193.736	166.41	154.663
1781	5	0.6	1	449.734	629.318	1849.9	955.734	391.247	325.683	228.802	204.238	176.525	164.417	143.485	176.399	240.87	285.11	607.378	656.629	256.809	247.226	222.398	191.182	163.461	148.629	160.623	189.607	353.851	1551.05	1116.19	488.442	350.655	243.765	226.483	221.528	194.838	175.427	177.594	629.313	690.493	1518.99	1434.75	1506.82	533.833	281.127	244.078	219.295	192.064	179.148
355	0.2	0.5	0.6	156.851	131.712	191.812	601.144	727.397	197.313	46.1699	42.5682	39.4863	40.0399	42.7852	80.5151	157.411	170.486	247.067	512.332	1131.98	235.274	47.7155	43.4624	39.9568	40.2353	38.7163	44.4367	46.1489	96.5514	212.622	394.175	603.752	337.552	48.3339	43.6618	40.3671	41.0217	43.7061	191.542	283.709	305.951	364.167	850.019	1499.91	529.42	63.8077	44.7643	43.3033	110.647
1101	1.5	0.8	0.6	110.487	104.222	197.823	229.182	199.75	174.402	160.605	79.1616	68.7824	67.1424	69.2216	106.671	89.7047	96.7516	104.708	105.79	89.3389	83.5272	82.8532	72.5587	64.1379	61.6156	56.913	57.0919	72.6967	116.431	125.815	117.539	104.027	79.3912	71.7767	64.905	58.6861	56.921	54.0877	215.797	281.482	200.477	200.254	207.882	308.909	197.292	183.966	165.505	114.747	73.6171
1023	7	8	1	235.898	305.307	674.717	1364.95	732.237	888.573	421.441	270.614	232.763	220.812	197.57	196.261	188.759	165.864	181.851	174.143	181.466	192.275	175.911	132.578	104.586	25.8524	98.6677	116.826	78.0427	118.126	184.722	130.042	108.237	157.944	172.761	99.2723	59.7846	39.0122	24.5587	22.9463	38.0566	64.5644	129.438	656.525	490.772	320.704	263.778	247.563	213.585	203.656
1060	1	1.5	0.7	37.3966	40.6503	56.1312	61.6411	33.5973	29.9017	27.8732	24.7747	21.8608	21.2041	19.9725	43.6723	31.4051	35.4917	51.788	36.7527	45.9141	56.1576	37.6339	35.2092	31.779	31.0856	71.9635	45.272	48.2352	185.303	58.4666	34.7995	31.3679	41.5903	42.0199	30.0109	26.6808	25.4128	27.4557	312.341	68.6696	89.3003	44.049	45.8436	175.909	51.0666	36.5245	32.1167	28.7321	28.0976
1864	1.5	1.5	0.5	238.845	203.961	354.832	444.655	247.548	158.766	83.6407	35.6192	30.2526	32.8187	36.4568	72.1868	72.8982	125.239	128.391	86.8554	49.4643	41.4751	37.7767	32.7008	28.6597	27.5336	25.3753	25.9306	54.3386	174.752	141.664	232.971	196.334	48.619	41.0763	39.544	53.6634	88.8223	98.9296	420.83	281.746	283.028	265.239	476.327	465.64	223.016	204.343	179.366	148.928	135.007
1797	8	3	0.5	3775.6	2678.57	5732.89	2654.51	1691.32	1334.01	1059.37	996.18	935.308	928.808	893.971	946.862	1082.53	2967.87	2151.71	2410.17	933.958	1274.86	574.4	488.157	442.493	424.857	391.34	664.021	3288.75	4322.95	3200.81	1465.04	1248.43	1170.34	1038.11	1120.05	971.217	961.055	1301.96	3637.9	2263.38	3625.24	3080.57	3324.15	2349.34	1416.99	1058.2	962.258	791.603	783.028
305	0.9	1.5	1	2151.04	1423.58	1618.73	1965.7	2988.66	3145.53	2098.34	1564.18	1772.57	1551.38	1739.56	2043.36	2445.4	1751.8	2062.45	1903.54	2762.77	3332.62	1881.44	1016.73	971.659	1409.13	1498.27	2236.1	1534.5	1694.26	3015.36	2944.68	2919.46	2697.64	2135.1	1645.75	1434.46	1940.67	1747.57	1954.37	2428.72	1767.82	2247.49	1817.58	1811.85	1752.69	2164.38	1633.21	1302.89	1391.56
968	5	2	0.3	42.5296	46.3624	96.4929	411.11	378.576	112.732	58.4804	58.7786	58.9163	63.7755	63.8222	63.5113	59.4809	53.7689	62.4428	58.3397	127.071	74.9734	50.946	57.2817	52.7112	56.1334	59.5701	56.7443	56.2046	60.3858	84.7076	59.8463	133.51	101.562	67.0329	45.5018	40.3065	38.9289	34.5527	36.0981	35.767	41.9341	68.266	185.384	85.0385	162.426	66.7151	54.213	56.9825	70.7433
1019	1.5	0.4	0.1	8.80658	9.97209	42.7574	49.6814	10.1601	8.94369	8.90124	8.65321	8.21332	8.37695	8.03756	8.26352	8.2207	8.09046	10.9136	9.27595	12.973	44.678	10.5285	9.62684	8.90437	8.87709	8.45162	8.61177	15.4596	63.6204	72.5038	43.6849	37.2395	14.1001	9.04231	8.7953	8.41803	8.63682	8.31594	82.1817	72.6041	43.3132	45.0738	58.5937	66.6866	40.2672	37.6578	35.8899	33.3935	33.4426
1302	5	2	0.7	18.4927	13.6972	14.6185	13.5582	13.2997	12.3813	10.8414	11.5912	15.8513	26.6466	34.3032	43.8943	36.3723	33.388	74.6936	42.4114	35.5899	205.224	100.939	19.3317	17.3641	17.7534	20.8677	20.7989	16.8602	17.4601	17.1577	13.9993	15.4629	13.9898	12.2217	13.1013	12.7759	13.4252	13.1179	14.7348	17.0108	34.8614	52.5313	32.9445	14.8796	14.3165	14.2961	14.3511	13.5606	14.1986
1824	9	0.7	0.1	8169.82	7154.45	16773.9	8924.23	4760.07	2767.31	2216.44	1794.19	1572.9	1858.28	1557.98	2106.11	1987.3	6775.87	4614.14	4940.17	2283.71	2069.31	1393.19	1050.46	819.435	739.652	671.944	1781.19	11696.2	9973.17	6949.08	5149.91	2614.6	2217.95	1888.94	1794.81	1578.71	1411.83	1429.71	11540.7	6338.66	8559.27	6529.52	9940.69	7820.41	3406.86	2265	1803.04	1450.29	1381.65
1316	9	0.1	0.6	0	0	0	0	0	0	0	0	0	0	0	0	0.510976	0.739937	1.32499	1.83044	8.88165	36.3472	43.3345	8.65566	6.55061	7.14809	12.4403	6.82949	4.74496	3.31718	4.05228	2.24054	1.68566	1.92878	2.22926	0.200895	0.153365	0.142632	0.13373	0.129667	0.13415	0.138078	0.170042	0.171718	0.215251	0.200888	0.172699	0.118339	0.102415	0.104267
1835	9	0.7	0.1	7265.44	6126.47	13818.7	7197.72	4089.37	2376.86	1959.13	1592.41	1451.78	1556.52	1303.23	1644.19	1671.77	6249.44	3583.53	4470.79	1863.5	1816.58	1188.83	885.925	729.181	626.314	571.04	1646.55	9616.28	9112.73	5702.62	3895.28	2288.34	1929.62	1731.77	1645.52	1415.17	1317.42	1338.31	8650.68	5037.27	6908.16	5768.14	7311.91	6145.11	2793.79	2088.61	1574.84	1276.89	1180.08
1847	7	1.5	10	5996.21	5021.94	11332.2	5583.38	3074.78	2025	1630.25	1395.55	1218.66	1196.02	1107.69	1432.26	1418.79	5029.08	3354.08	3629.44	1664.98	1754.23	975.96	783.354	619.822	559.894	504.014	1327.51	6869.84	7697.04	5624.02	2659.53	1997.74	1632.59	1447.52	1390.69	1234.26	1168.34	1298.62	6766.35	3930.91	5813.63	4492.88	5853.85	4289.69	2377.5	1634.76	1342.02	1134.12	1048.16
1231	0.8	9	0.8	53.4028	84.1685	62.4159	49.3303	48.5863	42.051	36.1861	30.9388	26.5395	25.8337	24.3039	25.0542	24.5143	21.6703	23.983	23.7095	28.1342	176.719	82.6558	43.8999	34.9231	35.4441	54.9448	57.4772	47.529	46.9788	53.1601	44.9889	44.5465	43.1785	40.2311	34.4616	28.9715	27.3983	26.5832	260.996	74.6306	96.344	98.3481	61.0126	51.1918	48.4156	44.298	38.3167	33.2367	31.2792
1140	2	0.8	0.1	2.55389	2.30977	2.48041	2.32077	2.42176	2.42217	2.49803	2.48018	2.33674	2.51355	2.29605	2.85452	2.50202	2.16293	2.56981	2.32094	2.32697	2.2895	2.39899	2.37621	2.23513	2.2719	2.19626	2.25191	2.24487	2.02233	2.23087	2.15232	2.57171	3.61396	4.29102	2.30097	2.17134	2.20238	2.1234	2.19993	2.68166	7.15742	3.90777	2.56806	2.2563	2.17096	2.25837	2.24894	2.1296	34.4686
1296	0.9	2	0.9	39.5467	52.6123	40.9647	36.0127	37.0153	36.2782	30.1181	27.1553	24.7679	24.0472	19.081	9.9282	9.93811	10.8216	12.7662	11.1347	10.8758	42.6988	23.1397	12.5932	11.0003	11.0601	29.0628	18.6971	13.9355	12.6046	13.9831	13.0688	24.7705	20.1371	13.054	11.4077	10.3321	10.1808	9.63553	27.3511	19.6761	41.1942	53.1962	39.3632	46.092	36.4533	14.7397	12.7971	11.1983	10.8601
1659	1.5	0.8	0.1	18.8718	21.6394	41.9291	34.8207	26.4276	22.7793	21.4703	20.1716	18.5454	18.0723	16.7814	17.5127	17.8515	26.6146	28.0902	24.7575	35.6577	31.3364	23.4495	22.3991	35.3615	24.1683	21.6226	21.7786	25.5601	42.1188	107.411	72.6608	30.5099	26.0379	25.1715	23.6123	21.6828	21.4516	21.5094	47.3627	32.8398	39.4125	45.6864	68.7184	67.0487	52.7766	27.4952	24.9571	22.7314	24.4463
1277	2	0.2	10	1.85999	2.20455	1.79042	2.24693	15.5968	5.43035	1.74766	1.70055	1.61881	1.68961	1.61068	2.17932	3.77029	8.27573	17.4003	13.4198	5.92626	29.6923	18.7961	1.94875	2.35302	2.32913	2.22221	1.73034	1.70305	3.15727	2.87179	3.9415	9.70138	1.97804	1.80952	1.74635	1.65	1.67461	1.60143	1.70247	1.87275	10.9448	18.897	6.11116	6.76087	1.8844	1.83795	1.77388	1.66982	1.69245
1021	3	4	0.2	125.995	222.458	185.143	194.961	93.4672	64.1105	44.9525	23.574	19.8631	12.9331	11.6488	11.3036	6.70698	5.84429	6.30911	5.92692	6.03401	6.45462	6.15785	5.78952	5.37536	5.71734	113.997	54.5011	52.0588	214.915	85.8479	52.1092	206.763	131.904	81.717	47.866	30.7261	21.1818	18.7178	17.5114	11.8452	61.3932	319.539	358.534	106.207	113.204	58.5547	34.5455	28.8716	31.4264
1280	2	0.9	0.1	74.9844	48.2609	50.7749	46.078	46.4278	46.0329	7.33667	3.62329	112.592	230.812	80.4278	94.3155	108.329	85.0825	151.105	85.6268	79.0555	70.1901	65.5386	59.9984	56.2588	72.7599	90.6068	64.0973	61.3424	57.1029	61.4424	51.4075	36.3518	22.0188	24.0013	5.82824	11.0579	12.5468	17.8503	16.5972	21.2115	33.493	39.1414	18.2816	11.6873	11.1812	5.23536	4.83828	4.32573	4.52299
1120	5	1.5	0.7	5.06587	5.1658	5.99946	5.96608	6.09154	5.95372	5.84915	5.2634	4.61301	4.45553	4.13959	4.19601	4.09244	3.56612	3.83978	3.60393	3.62275	3.43398	3.45079	3.33321	3.17597	3.24405	3.21068	3.39474	3.48333	3.29404	4.09105	4.55328	10.7983	25.605	15.4498	12.1892	9.38743	8.29141	7.22644	7.10691	6.63951	5.81253	7.31218	7.96752	7.73512	7.24331	6.89182	6.06682	5.25063	22.4824
182	8	0.1	0.7	757.18	633.798	213.519	113.645	45.1952	10.8003	10.4221	10.1179	9.6027	9.84037	34.5173	9.67267	34.6812	171.858	195.264	125.529	11.7625	10.3673	8.98333	7.97732	7.3891	7.53369	51.1634	560.49	290.237	490.142	396.942	525.701	135.819	83.7294	12.6235	10.1434	9.65398	10.1276	312.452	588.045	374.882	544.804	670.386	301.268	113.641	86.5096	12.1159	38.1753	37.3424	37.085
7311	2	0.1	0.1	13.4794	35.3542	45.5007	47.2037	15.1759	12.7275	5.92421	5.75763	5.51606	5.4702	3.83418	3.8763	3.84895	2.13514	3.80493	2.28848	3.80915	15.0157	12.9749	9.18592	5.66257	8.66891	19.1685	23.6261	16.398	44.9479	24.8617	15.3307	47.9316	93.8266	20.9878	17.1185	12.8514	12.5973	10.5896	12.1015	15.9546	52.321	45.5639	95.8423	39.6063	22.8307	11.8217	11.1164	12.3533	10.5273
1755	1.5	0.8	0.1	55.1057	55.4311	80.9656	72.8982	51.3734	45.6074	42.9739	39.6665	35.6026	34.1913	31.1641	34.091	35.5589	71.5556	65.4931	51.1591	49.9667	77.6024	52.4058	42.3473	38.228	36.7881	35.0142	57.3284	100.676	139.478	111.222	67.6042	58.617	47.6588	44.6463	41.8688	60.7292	42.3608	37.9253	59.495	75.4521	106.167	54.0296	111.342	141.357	118.931	102.819	95.1861	69.1274	43.9346
1152	4	0.9	0.3	0	0	0	0	0	0	0	0	0	0	0	0	0	0	0	0	0	0	0	0	0	0	0	0	0	0	0	0	0	0	0	0	0	0	0	0	0	0	0	0	0	0	0	0	0	0
1192	7	1.5	0.6	252.392	332.01	243.011	260.323	271.409	183.619	137.325	111.251	110.05	110.596	111.887	112.033	116.951	114.301	126.57	119.772	125.207	229.554	145.418	102.936	86.4728	100.755	102.849	109.274	127.104	183.391	160.133	127.404	112.236	93.3687	77.1138	71.8999	66.3512	67.1695	65.5003	251.947	376.075	321.255	285.146	179.886	161.192	131.324	109.013	91.1073	75.5963	79.4732
541	1	3	2	33.1773	25.9377	24.6744	34.7715	1348.83	460.515	84.1434	57.3471	51.8148	45.5168	40.7723	33.6504	26.7809	20.6637	19.3318	151.703	512.783	57.7758	42.623	26.2021	18.9696	22.9932	19.2645	19.7317	19.0985	13.1374	15.8264	67.2191	1074.63	234.899	62.2165	55.7961	47.0986	41.5784	33.2164	27.449	23.8868	16.8755	17.8369	28.5652	656.626	678.878	50.9866	57.8181	42.866	35.9788
1822	10	0.8	0.3	4867.88	4291.94	8860.21	4206.96	2669.03	1550.29	1418.43	1201.32	1099.35	1024.72	1042.33	1224.4	1292.27	4546.08	2412.12	3031.41	1594.34	1524.96	803.612	654.311	540.648	490.683	447.599	1047.77	5494.03	6373.71	4770.4	2011.94	1685.93	1432.41	1288.98	1269.79	1123.67	1093.8	1245.01	5662.74	3620.41	4428.71	3962.07	5128.01	3450.87	1602.87	1385.98	1150.11	987.937	935.601
972	8	1.5	0.4	72.9719	131.552	291.752	822.236	134.451	100.503	74.7122	52.1139	29.1096	22.0346	13.9478	12.2268	11.5183	9.89252	10.5613	10.2192	43.6661	65.7056	31.0572	19.3053	12.3499	10.8147	9.77321	10.3544	10.3326	14.1561	53.5561	44.2441	39.589	39.3332	35.2177	23.269	12.9681	11.5577	10.1985	10.0029	9.7131	10.1427	31.7066	208.283	144.958	90.0973	71.7966	27.8154	15.2167	11.4994
613	3	0.2	10	114.667	264.583	313.466	612.918	1313.3	852.412	295.155	30.0329	27.9075	30.2738	131.842	118.002	114.342	92.0805	183.221	378.173	304.022	78.8192	28.8903	25.1099	22.6162	22.893	22.3799	23.1693	23.5238	24.145	191.535	330.469	682.311	198.333	32.3463	25.3226	22.867	23.2514	24.1105	29.3066	30.3358	76.2447	408.912	493.791	623.559	548.457	40.4436	28.4498	24.8987	25.0483
1086	0.4	8	0.5	0.973752	0.977319	1.10168	0.967288	0.819096	0.582908	0.576677	0.550268	0.513833	0.541748	0.666667	0.804194	0.778737	0.694935	0.834208	0.79455	0.631412	0.446596	0.442475	0.423502	0.393697	0.516295	0.647773	0.690158	0.695801	0.653099	0.812457	0.692387	0.521638	0.328983	0.31339	0.291938	0.270224	0.329564	0.483194	0.672804	0.912729	3.95563	6.28231	5.84049	1.37478	0.27063	0.253896	0.204789	0.0213904	0.0343513
1295	4	5	0.8	31.2772	56.5385	35.3641	30.5227	37.2171	24.6941	19.6759	16.703	14.4657	14.3485	13.8037	17.3181	18.8886	24.6614	22.3871	17.8529	21.0304	39.6377	34.2657	21.8497	18.744	18.2457	84.2553	33.2294	26.546	26.1975	30.5924	78.6375	91.7983	37.665	25.0717	21.0882	17.3996	17.2383	85.3051	144.932	63.0957	152.505	107.716	49.7163	102.903	48.6932	23.5614	21.7707	20.3963	19.4618
1139	1.5	0.7	0.1	8.47701	6.95075	7.60389	6.79163	6.796	6.48712	6.26776	6.03576	6.57876	15.7248	9.60228	19.6458	9.10714	8.05482	31.9182	19.4003	9.89641	12.5029	8.11549	7.47405	6.9222	32.7292	34.4132	20.1735	18.3422	19.8506	21.8931	18.8645	30.1039	38.6921	32.6104	21.067	18.9324	18.3923	16.8707	18.9692	22.4519	21.155	21.8342	20.1094	16.8581	8.68694	7.67699	7.1991	6.64973	7.72037
1862	0.3	0.7	0.2	790.76	493.703	1849.47	428.079	300.737	140.803	102.486	94.6108	89.1346	90.8641	100.16	119.103	104.944	812.081	241.855	258.759	95.0877	162.952	93.2752	89.585	82.0098	78.8936	70.863	128.986	716.415	1224.29	375.664	445.584	143.541	104.94	94.6985	93.4544	87.7584	88.0963	111.717	996.676	401.382	775.873	631.029	653.354	266.488	145.182	100.039	94.4778	89.4483	89.414
629	7	0.1	1.5	1931.04	4520.92	3897.42	2142.57	2942.84	5066.57	2180.36	1799.06	1669.44	1749.26	1742.26	1752.46	1749.16	1649.2	1768.38	1663.8	1656.88	1644.87	1724.18	1684.77	1554.23	1631.31	1554.59	1637.32	1713.17	1503.1	1582.6	1559.92	1621.19	1469.79	1612.69	1465.32	1316.84	1329.97	1324.53	1539.47	1401.74	1312.74	1577.9	1286.12	1266.62	1248.72	1311.31	1664.15	1316.01	1531.9
1000	3	0.7	0.1	23.6622	29.4146	38.6825	34.0927	27.4885	23.5801	22.6708	21.1285	19.1946	19.1061	20.9549	30.0646	23.445	26.1922	32.1238	22.4067	34.7178	52.0754	37.1428	27.32	24.7367	24.7154	32.3074	44.6242	41.5997	134.415	36.891	28.1965	26.2061	31.243	27.2813	25.1721	25.2717	23.42	22.4064	139.5	31.4698	26.5976	26.7226	146.876	59.1833	27.6797	26.1065	24.5105	22.4357	49.1383
7306	0.2	0.1	0.1	7468.62	6265.24	15257.2	6849.31	4269.38	2533.15	2004.22	1687.77	1468.51	1600.79	1444.67	1655.31	1898.4	6056.41	4123.5	4318.09	2017.29	1959.7	1177.76	971.198	773.539	736.948	659.499	1721.76	9610.26	9057.67	6788.11	3712.43	2556.38	1988.53	1761.15	1674.96	1470.24	1361.23	1442.19	8966.14	5296.09	7307.26	5792.33	8015.88	6595.45	3005.97	2021.39	1623.92	1344.17	1224.39
991	3	0.1	0.1	76.5111	139.555	162.06	180.573	64.8991	44.4422	27.7556	19.7786	18.8479	12.4742	12.1001	18.3693	12.3753	11.57	18.6193	12.5069	52.0059	51.5062	42.3797	49.1824	33.6242	33.0276	162.462	113.98	83.3177	138.052	101.299	56.8105	98.725	181.96	72.0197	51.9592	34.5565	26.6443	25.4504	18.8246	12.4641	51.7057	80.6789	348.205	132.087	95.6716	56.9585	43.2362	26.8811	32.4354
7317	0.4	0.1	0.1	62.1927	146.042	393.992	66.2574	65.6677	32.7237	33.6942	33.3064	31.6883	32.0999	30.3668	30.7669	30.2917	30.3205	42.9297	47.8286	33.787	32.534	33.1764	32.4898	30.6874	30.7929	29.0463	30.8884	261.044	163.866	92.6434	63.0161	35.4821	32.6195	33.3667	33.0117	31.5975	32.117	30.5681	217.078	91.4869	162.477	62.852	233.132	249.121	46.5461	34.5908	33.6607	32.2587	32.8997
998	8	0.4	1.5	193.686	176.862	121.78	540.168	768.532	383.275	81.3367	63.5278	59.8818	94.4037	123.839	155.019	117.818	78.49	183.304	85.541	50.3811	45.7775	60.01	38.4289	8.65466	39.5124	42.2513	40.2089	34.9075	36.3154	52.7043	29.6246	12.0499	20.7413	73.7666	81.8844	89.0945	99.3752	95.3432	96.9071	89.4344	53.9928	161.294	306.871	167.617	129.975	112.441	110.738	107.989	125.665
1716	6	1.5	0.7	47.8188	53.4912	147.597	125.822	49.9861	40.7661	36.8334	32.3998	27.7535	26.2101	24.2144	32.2286	33.1051	61.3452	56.8206	37.5892	111.691	151.701	44.2211	37.9568	33.2712	30.6862	28.031	30.4141	124.865	266.024	242.9	71.5251	47.5816	46.1044	40.9327	35.6652	31.1629	30.5301	27.9314	361.509	235.99	126.76	94.0226	178.99	348.962	191.878	50.9458	41.4691	36.8413	96.6929
1896	10	0.9	0.9	401.309	497.371	1084.72	764.378	323.112	308.753	264.492	230.775	210.835	248.008	217.85	220.317	198.282	395.881	360.91	280.602	248.658	238.893	215.412	201.689	184.391	162.889	154.613	157.641	296.143	618.219	483.556	495.044	351.109	248.273	242.862	237.456	199.356	201.096	185.036	289.237	639.912	298.485	669.676	476.354	303.587	263.556	245.303	230.179	226.851	214.947
1883	5	0.2	0.1	297.193	206.528	449.195	154.307	72.3191	42.3783	27.4966	14.6796	24.7266	13.9659	24.3444	37.4517	26.6662	325.521	63.3675	42.2824	26.5472	13.886	13.8473	13.5463	12.7034	12.7143	12.107	12.6154	337.376	322.892	122.125	114.865	50.8795	40.3445	26.471	25.6006	13.3552	13.5411	12.95	94.5863	237.47	271.567	290.864	267.481	52.2059	41.8583	27.7955	26.3195	24.9941	13.7492
1285	3	0.5	0.2	6.03585	4.97313	5.70581	5.86078	38.5148	10.0997	5.87999	5.67852	5.31922	5.36596	5.10047	6.99471	6.48054	14.6096	19.9845	10.0793	8.62285	85.3211	49.3629	6.23528	5.82071	6.88289	6.85652	5.91845	5.77353	5.16912	5.70252	5.42877	14.9065	6.44498	5.85496	5.65752	5.29935	5.32868	5.04984	5.30969	5.92938	42.5085	36.3808	8.73704	14.5021	7.77145	6.02441	5.84871	5.48784	5.50763
1266	6	10	1	9.88293	18.6238	18.448	15.777	19.249	18.8721	13.7163	12.0907	10.0519	8.97121	7.61953	7.0684	6.35013	5.3664	6.21304	6.69951	7.11868	7.47778	9.94933	10.0159	8.78851	8.22558	7.98883	8.62461	8.56616	7.99502	9.53244	9.69505	12.7817	13.3802	11.8276	10.0349	8.06617	7.04972	6.04511	22.817	20.2356	40.3717	58.048	30.5056	26.7545	31.24	14.336	12.7303	11.1059	10.0272
1176	4	1.5	0.7	54.7189	25.8853	26.5588	23.2706	11.8235	16.4041	27.5482	25.7259	38.8506	241.83	77.9431	145.728	62.6329	41.3342	61.5191	46.8646	46.5223	36.9557	31.3826	24.9615	17.961	36.8699	36.7509	16.1497	14.9155	17.4502	18.6435	14.9831	57.8651	134.206	137.908	59.8924	31.9541	21.9939	16.3326	14.977	18.616	89.2703	28.3195	20.2657	18.3743	32.5423	34.7863	29.5712	20.6127	45.6366
924	1	0.3	0.1	33.2564	17.1262	35.0446	36.5734	19.5423	30.6267	9.68339	8.25379	23.8767	11.8854	21.1679	36.8201	36.0285	30.7463	38.8596	31.7887	31.8154	24.3541	40.6969	44.2165	29.5493	29.0211	28.0981	30.203	13.3376	23.7409	45.8895	36.1355	46.4024	53.1669	79.3868	35.211	33.9054	34.8434	34.0074	76.8528	40.306	69.4412	61.4931	102.873	35.0845	33.6667	33.9365	32.6419	30.4673	30.514
758	1	1	1.5	110.834	110.079	92.1339	71.9607	71.1544	64.9836	63.7972	79.7005	75.1068	68.6535	64.2266	65.8585	61.1963	60.4654	63.9255	74.1035	68.547	54.7836	56.6532	48.0236	53.3221	62.6807	61.2362	53.5395	58.0817	47.5212	63.0937	57.3083	68.6743	66.7293	95.3381	63.4133	68.1186	96.0851	82.491	73.5194	83.492	63.5077	75.0002	63.3842	67.3644	73.0835	80.0362	62.2446	62.3776	73.2668
1257	0.7	8	0.9	0	0	0	0	0	0	0	0	0	0	0	0	0	0	0	0	0	0	0	0	0	0	0	0	0	0	0	0	0	0	0	0	0	0	0	0	0	0	0	0	0	0	0	0	0	0
895	10	2	0.9	2901.13	2701.09	3073.89	3095.12	3074.47	2917.43	2844.59	2413.2	2185.82	2328.18	2184.41	2334.58	2250.77	2129.04	2246.2	2262.29	2241.74	2166.81	2304.72	2002.02	1921.88	1982.13	1923.39	2063.77	1983.72	1901.55	2154.97	2201.62	2282.26	2346.45	2170.46	2401.9	2336.19	2418.23	2472.96	2460.76	2552.5	2265.25	2802.37	3265.36	3423.06	2874.78	2827.73	2744.08	2653.39	2690.37
1317	1.5	4	1.5	6.29474	2.99418	1.64194	0.887886	24.756	49.2617	1.26141	160.792	109.151	19.4097	15.4133	25.8837	13.6815	8.24291	7.41253	5.13727	24.5168	63.5904	69.5384	19.1845	21.3649	33.8541	43.4443	12.5625	10.3433	13.5092	14.8277	10.7175	14.3779	5.04576	4.77338	4.85401	4.20496	7.82379	10.582	6.67943	3.34236	6.09829	5.61243	0.906585	0.817834	2.77405	8.86485	8.39979	5.88096	7.50576
1242	5	1.5	10	11.3991	8.08166	8.81318	4.0265	2.92441	2.64895	2.3449	2.02296	235.032	351.425	51.6617	54.5897	54.8364	45.2452	41.6354	34.0402	22.0473	5.87501	5.02499	16.1351	39.9397	33.6418	15.5866	14.9331	14.0722	15.284	10.8419	6.68329	2.89281	2.25941	1.88382	1.53095	1.26467	1.1709	1.16072	6.08354	148.379	138.297	48.6931	26.1885	16.7092	1.74327	1.11519	0.609163	0.331907	3.04307
107	0.5	0.1	7	73.3307	90.7315	115.131	59.2911	32.719	31.2557	30.7873	27.621	24.3126	5.41518	6.4354	27.8437	31.5454	30.9965	33.5804	34.2124	32.4423	30.7584	29.2661	22.3584	4.47381	4.50793	11.3668	239.739	198.974	237.037	136.606	87.3384	36.0434	31.5286	31.9321	29.886	27.1126	26.8317	25.0929	75.943	146.61	285.734	216.283	63.0992	48.5371	31.5512	32.0902	30.4575	28.0113	27.8326
1841	2	2	0.5	150.32	175.194	363.656	242.78	71.58	36.7614	28.6499	21.1961	18.5415	17.9579	16.3738	18.0144	17.1172	145.152	72.066	91.6551	21.8334	22.0298	18.615	16.629	14.9522	14.1065	12.9538	16.7675	225.235	344.339	126.554	60.2666	33.0894	24.0629	19.761	18.5302	16.3572	15.604	18.7142	250.131	92.631	131.34	95.3258	126.694	97.7012	46.7899	27.2248	21.1465	18.5719	17.5203
907	2	4	1	169.631	216.763	246.591	249.353	197.172	152.826	122.385	89.1749	92.6329	92.1667	75.4984	72.3897	61.9314	62.0048	100.783	103.867	85.7318	65.2444	65.7873	69.1985	66.2805	66.4616	74.9487	68.5265	62.666	81.4164	494.567	404.3	333.061	406.962	277.593	212.987	157.774	139.865	170.654	329.291	259.85	433.345	653.391	998.667	547.683	303.441	275.814	177.166	140.441	172.685
80	0.7	1.5	0.2	331.149	244.762	317.355	222.131	135.159	126.609	129.185	149.775	24.904	17.9174	167.201	275.211	259.617	196.255	153.696	162.708	136.225	172.243	123.414	155.564	91.8945	106.083	169.349	301.174	325.816	559.628	352.711	342.673	143.152	126.734	118.916	174.901	73.4878	108.428	199.378	311.104	323.534	526.658	468.688	179.846	176.293	129.99	133.114	128.531	170.09	25.5002
1236	0.2	0.7	0.9	4.89379	3.73484	4.2152	4.04028	5.28106	5.39457	5.25966	4.39627	3.62814	3.58618	3.3542	4.50461	6.60856	5.89592	7.28578	8.83352	8.76922	7.84348	7.49096	6.1648	4.94374	16.9917	18.0841	10.7049	9.84107	8.86913	10.5685	10.3074	9.93688	11.9674	16.2243	11.1564	9.11829	7.79162	6.4411	5.87848	5.45923	5.20462	6.89768	8.45576	9.20514	8.16238	7.15536	5.5893	4.17113	3.44765
981	8	1.5	0.2	126.372	123.786	154.059	641.865	165.962	119.711	113.305	114.15	103.574	110.463	104.969	104.932	108.337	94.5175	103.873	103.109	111.704	83.544	18.8877	16.1319	12.0709	12.0506	13.3661	15.5566	15.7137	31.2357	33.1036	20.7861	22.2061	21.4588	42.1919	37.4792	36.2195	33.8782	35.3447	35.4439	33.1951	49.011	52.8631	85.9304	53.198	43.8315	69.1418	64.2339	65.388	62.1497
1093	3	0.7	0.7	22.1087	20.4567	28.1426	27.4826	27.7845	27.5862	23.0716	18.1301	14.5752	14.8248	15.9065	20.5523	23.2978	26.1974	39.9215	30.9995	35.1817	54.8968	39.3676	31.5951	27.2834	25.4868	25.5446	26.6465	28.5348	86.7469	76.4737	39.247	73.8493	85.895	42.0353	37.0813	33.3433	32.2287	29.8149	99.817	72.7333	47.1603	58.7411	47.926	219.204	48.3623	36.9801	34.011	29.9202	28.7284
1709	0.9	0.3	0.1	54.4287	57.377	129.057	110.904	62.2771	56.0626	56.9362	55.2325	50.7345	48.3648	37.8388	18.1339	26.4974	45.3459	62.8381	58.9275	59.2551	79.5957	57.8716	56.0996	51.5426	50.6424	48.0122	51.7223	60.8584	101.482	183.193	63.2432	57.6105	58.2843	57.9301	56.5694	51.852	49.7936	46.2554	52.776	51.8974	55.4141	62.9911	60.8898	124.008	68.5802	57.3954	55.3364	49.9738	47.8805
1017	1.5	1.5	0.3	9.41992	46.0702	110.743	44.7752	17.9146	10.3214	8.41131	7.92001	7.26911	7.16318	6.66439	6.87101	6.56359	7.96535	10.3475	9.83444	35.8295	64.4923	19.0733	9.71119	7.79951	7.61042	7.40088	7.67751	44.168	138.144	148.768	86.9921	65.4171	36.8728	10.2343	20.1153	39.9123	22.24	33.6544	290.474	100.993	76.5088	82.9801	93.1764	94.2869	79.7492	74.1076	65.654	55.303	49.3945
1194	0.7	1.5	0.7	10.0012	9.88894	12.1482	11.278	10.7912	9.42639	8.74357	7.82667	6.90701	8.60152	9.25412	9.79352	10.3923	8.5687	9.36989	9.7033	9.71811	9.07385	8.90302	8.05023	7.18282	57.2988	88.5452	27.2627	20.4526	30.0625	24.3641	19.4287	50.9965	63.4778	41.7273	18.7483	13.896	12.4576	10.8569	9.64647	9.30346	8.27373	9.45059	9.50937	9.60835	8.9871	8.79924	8.06725	7.20599	6.95252
[truncated: 434 more columns]

## Sheet: Storage(WG inflow-No Demand)
grand_id	q1	q2	q3	1980-01	1980-02	1980-03	1980-04	1980-05	1980-06	1980-07	1980-08	1980-09	1980-10	1980-11	1980-12	1981-01	1981-02	1981-03	1981-04	1981-05	1981-06	1981-07	1981-08	1981-09	1981-10	1981-11	1981-12	1982-01	1982-02	1982-03	1982-04	1982-05	1982-06	1982-07	1982-08	1982-09	1982-10	1982-11	1982-12	1983-01	1983-02	1983-03	1983-04	1983-05	1983-06	1983-07	1983-08	1983-09	1983-10
610	1.5	0.8	0.9	32894.5	33881	36385	36693.5	36645.6	36700	36607.2	36003.4	35333.1	34683.9	34041.2	33392.8	32713.7	32051.8	31492.1	31051.8	30258.7	29409	28452	27210.8	26063.6	25532.4	25383.7	25246.9	25127	25272.4	25623.9	25599.8	25399	25149.2	24873.6	24576.5	24338.5	24130.9	23959.4	23991.2	24226	24638.7	25388	25646.1	25559.2	25326.3	25113.2	25263.5	25486.8	25630.2
753	1.5	0.9	0.9	20082.1	20327.8	20597.5	21017.7	21087.7	21079.2	20983.3	20532.6	20197.7	20023.1	19939.6	19860.6	19882.7	19869.7	19878.4	19960.6	20221.8	21138.5	20939.7	20515.9	20098.5	19846	19715.3	19560.9	19520.8	19484.6	19610.7	20767.6	21752.5	21957.8	21618	20965	20813.5	20969.2	21088.5	21085.6	21082	21082.1	21082.6	21079.4	21092.5	21441.4	20985.1	20587.8	20262.2	20182.7
870	1	0.7	0.1	26174.4	26345.2	26486.9	26661.7	26697.2	26694.7	26486.7	26170.7	25892.4	25703.2	25649.7	25611.6	25563.6	25508.3	25478.5	25392.4	25209.9	25014.9	24677.6	24159.1	23556.3	23077.9	22659.2	22303.8	21940.6	21570.7	21267.2	22431	24190.4	25172.3	25476	25572.3	25649	25844.5	26160.1	26415.3	26640	26782.8	27026.5	27594	28260.6	28539	28588.3	28607.5	28703.8	28877.7
597	0.5	0.9	0.9	24938.4	25070	25070	25070	25070	25070	25036.5	24691.5	24356.5	24321.4	24519.9	24725.4	24844.8	24779.3	24560.7	24514.8	25045.9	25057.7	24676.1	23875.9	23055.8	22394.1	22082.2	21935.3	21759.5	21573.6	21898.8	22840.2	24402.6	25070	24990.7	24494	24060.5	23951.4	24111.1	24422.9	24730.8	25035.2	25070	25070	25070	25070	25070	25027.7	24917.1	24984.6
307	0.8	0.5	0.8	13762.6	13650.8	13607.1	13737	13896.7	13995.9	13922.8	13493.1	13245.7	13163.6	13166.9	13172	13185.8	13189.3	13296.4	13668.6	14435.3	16367.3	16375.9	16025.2	15723.1	15630.6	15692.5	15764	15830.9	15904.3	16397.4	17488.6	18571.7	20497.4	21453.2	21200.9	20884.2	20718.7	20687.5	20674.7	20713.6	20728.2	20757.5	20827.2	20844.2	20764	20326.1	19682.6	19056.4	18715
1753	4	2	0.5	2843.94	2745.69	3337.37	2896.38	2762.76	2814.02	2872.32	2885.28	2905.81	2922.62	2886.25	2892.97	2886.58	2836.95	2761.5	2808.69	2830.77	2890.38	2849.92	2714.91	2562.3	2293.5	2068.53	2287.54	3594.94	3343.36	2652.78	2789.36	2818.41	2873.06	2878.84	2882.53	2887.8	2931.9	2916.73	4005.74	2950.47	2741.83	2730.89	3122.22	3105.94	2862.52	2853.44	2893.57	2879.24	2948.05
297	4	10	1	1431.17	1205.59	1161.11	1360.19	2498.37	2442.34	2013.63	1929.97	1923.29	1788.43	1738.67	1549.4	1601.19	1511.37	1440.85	1439.17	2142.1	2642.6	2612.06	2053.36	1811.34	1780.38	1589.51	1480.09	1293.42	1215.53	1181.86	1125.02	1621.49	2300.19	2320.5	1956.09	2001.26	1994.04	1776.15	1612.96	1496.85	1373.14	1376.29	1368.91	1727.56	2107.53	2238.27	1952.59	1831.59	1641.86
1036	0.9	0.5	0.1	4571.75	4718.62	4752.93	4815.99	4753.22	4662.12	4615.37	4564.76	4516.78	4483.3	4459.91	4472.56	4455.94	4489.1	4513.59	4505.33	4519.87	4557.07	4540.7	4501.32	4457.69	4420.04	4486.92	4495.21	4555.63	4916.73	4851.49	4670.14	4624.11	4661.58	4665.41	4658.48	4657.81	4656.72	4670.94	5500.77	5711.45	5767.98	5770.7	5850.05	6162.95	6166.92	6094.29	5993.3	5889.18	5801.24
989	2	0.7	0.1	3019.82	3099.24	3634.63	4318.24	4339.32	4245.68	4056.46	3832	3621.45	3400.29	3214.12	3094.45	2962.36	2866.36	2864.09	2760.54	2784	3586.3	4383.42	4406.58	4350.19	4232.44	4417.26	4447.97	4449.1	4546.38	4444.8	4451.57	4439.11	4449.74	4452.96	4454.38	4440.3	4333.16	4204.16	4449.31	4435.61	4454.95	4456.83	5536.83	5227.43	4523.14	4432.03	4334.17	4179.02	4126.48
1135	0.5	1.5	0.7	2077.75	2034.85	2000.32	1931.12	1904.01	1979.81	1871.91	1768.16	1690.57	1910.02	1860.04	2017.33	1976.2	1925.53	2050.49	2037.23	2045.75	2149.67	2105.18	2038.58	1982.18	2535.63	2505.86	2484.77	2479.43	2561.09	2543.59	2546.26	2818.15	3256.42	2791.93	2542.4	2546.3	2544.91	2534.78	2545.33	2545.8	2596.73	2540.68	2541.75	2559.73	2542.57	2525.8	2460.5	2382.71	2570.94
1269	7	9	1	1630.63	1961.74	1913.53	2233.77	2367.01	2184.42	1989.18	1842.77	1693.67	1596.57	1537.83	1474.75	1398.59	1359.55	1322.91	1248.8	1201.96	1341.55	1303.96	1167.82	1126.1	1059.74	1029.36	992.889	969.094	1041.25	1025.26	1086.78	1236.02	1096.2	1030.58	981.352	911.804	890.444	902.069	1485.03	1923.51	2109.48	2429.02	2435.23	2371.71	2405.79	2268.53	2153.37	2032.72	1907.93
1077	4	1.5	0.8	1142.49	1198.78	1220.42	1219.27	1383.8	1629.86	1510.62	1413.14	1327.43	1269.95	1205.05	1171.49	1103.08	1056.18	1066.53	1034.04	1003.79	1026.65	974.299	927.499	888.351	958.859	1353.35	1357.62	1319.97	1838.68	1774.01	1761.95	2021.4	2375.52	1897.77	1849.62	1807.86	1752.4	1694.04	1754.8	1803.47	1914.94	1863.49	1864.53	1897.85	1858.45	1829.11	1752.61	1669.3	1809.56
1026	0.6	1.5	0.9	1141.57	1231.89	1266.8	1321.68	1229.7	1185.36	1131.39	1047.03	980.397	921.238	887.358	940.932	865.878	909.175	906.102	855.719	895.515	988.175	934.271	910.043	878.226	853.677	1013.8	935.212	950.712	1488.23	1343.26	1227.7	1155.23	1126.27	1078.28	1026.91	1016.42	938.087	913.401	1732.3	1415.92	1457.08	1376.03	1466.7	1683.72	1503.47	1427.42	1348.39	1271.42	1258.28
740	9	2	2	2067.02	2084	2077.97	2028.37	1922.95	1825.22	1754.29	1742.48	1816.64	1837.02	1867.95	1890.25	1891.89	1886.94	1864.11	1835.09	1784.66	1816.3	1826.64	1792.98	1805.11	1878.69	1892.74	1922.18	1963.27	1987.78	1976.72	1954.16	1916.74	1887.41	1870.53	1854.34	1833.6	1940.77	1975.6	1987.35	1988.98	1979.91	1986.25	1954.09	1882.42	1846.79	1824.73	1782.89	1852.91	1921.52
1294	0.4	1.5	0.8	2842.63	2817.77	2789.93	2677.86	2532.79	2387.96	2235.09	2082.71	1960.5	1855.22	1744.77	1673.13	1586.87	1579.39	1601.29	1582.92	1583.52	1702.61	1601.89	1583.34	1583.93	1583.9	1583	1583.71	1583.88	1583.94	1583.99	1568.03	1559.19	1546.35	1523.61	1498.73	1473.29	1448.96	1425.72	1410.22	1406.05	1439.37	1492.45	1522.66	1500.64	1497.81	1477.86	1453.22	1425.96	1399.37
1848	1	1	0.1	3067.56	3109.23	3377.58	3705.24	3645.8	3524.81	3392.31	3256.85	3122.4	3008.72	2985.09	3050.35	2967.19	3029.1	3004.03	3024.37	2924.23	2862.73	2770.66	2661.44	2561.93	2463.85	2376.36	2310.65	2433.31	2540.81	2563.79	2676.47	2635.83	2542.67	2445.63	2356.19	2266.04	2185.76	2131.78	2623.6	2973.49	3092.66	3144.08	3304.24	3511.12	3631.91	3513.84	3377.92	3244.75	3124.7
1869	2	1.5	0.7	1308.25	1376.67	1707.1	2150.86	1880.84	1665.21	1493.26	1342.5	1272.16	1233.12	1194.29	1172.24	1147.8	1194.77	1291.44	1311.92	1272.49	1233.04	1183.36	1122.62	1070.44	1022.01	978.622	939.685	973.742	1176.32	1251.52	1470.34	1371.84	1256.33	1210.42	1163.9	1118.98	1079.11	1040.91	1777.53	2112.62	2207.86	2171.12	2339.53	2331.99	2252.02	2001.22	1794.11	1604.5	1443.99
1863	1	1	0.1	2819.96	2998.68	3121.35	3142.26	3118.33	3098.98	3041.53	2957.17	2869.77	2809.46	2766.37	2722.11	2661.61	2751.36	2783.16	2748.29	2673.3	2606.61	2519.62	2434.83	2355.51	2274.76	2205.31	2151.44	2371.7	2626.07	2731.75	2717.24	2736.54	2668.24	2595.74	2525.52	2447.52	2385.02	2338.64	2467.12	2588.64	2737.24	2823.68	2996	2989.9	2944.07	2870.74	2785.68	2711.52	2635.67
1770	0.8	0.1	0.1	2747.37	2898.59	3086.62	3147.5	3136.36	3092.58	3030.24	2957.94	2885.07	2812.23	2741.73	2682.38	2633.96	2710.93	2808.1	2821.77	2809.69	2799.05	2760.04	2698.2	2637.27	2573.14	2518.82	2534.54	2721.19	2999.68	3135.46	3143.42	3108.87	3056.58	2989.98	2922.03	2857.33	2784.3	2719.24	2858.8	2998.39	3094.97	3145.55	3146.15	3146.89	3136.04	3083.61	3015.36	2945.84	2876.95
965	2	0.2	0.1	1946.46	1944.8	1962.59	2108.65	1986.18	1945.28	1945.1	1940.56	1939.96	1938.02	1942.66	1945.37	1944.75	1945.53	1945.88	1945.72	1952.63	1939.1	1925.58	1934.82	1945.87	1945.41	1946.31	1948.33	1946.37	1967.57	2005.5	1960.08	2024.44	2075.15	1973.71	1945.22	1945.69	1945.71	1945.77	1945.73	1945.72	1952.72	1974.44	2289.77	2221.16	2175.59	2105.49	1968.43	1946.22	1945.9
1247	6	8	1	689.193	664.663	643.645	619.244	610.983	594.815	553.433	517.456	497.11	722.887	614.66	733.719	675.133	655.457	688.641	668.474	659.898	640.682	626.209	609.397	592.535	800.17	643.312	558.55	551.322	578.856	584.522	571.884	673.434	790.121	817.497	770.206	752.98	736.715	722.496	712.823	708.776	727.455	721.612	729.534	706.299	702.272	677.347	649.222	625.505	604.757
7313	9	0.6	1	1678.05	1726.97	1699.18	1695.99	1682.1	1659.69	1595.13	1410.99	1315.93	1385.1	1468.42	1551.34	1639.36	1682.41	1701.04	1695.66	1680.8	1644.14	1590.92	1370.4	1189.09	1146.95	1211.7	1311.84	1436.38	1536.9	1683.6	1660.36	1640.63	1654.51	1626.95	1501.86	1404.02	1509.72	1631.62	1712.48	1697.67	1697.73	1679.4	1668.4	1680.77	1688.09	1661.5	1568.04	1477.1	1513.8
1287	0.8	9	0.9	488.66	705.452	667.611	658.319	667.443	649.798	561.952	479.938	409.906	463.135	406.546	389.197	356.088	321.042	330.091	326.779	325.024	775.612	737.366	607.618	559.069	670.732	829.225	732.748	650.773	771.306	763.884	748.972	840.244	669.424	536.07	497.505	454.416	429.106	418.058	792.43	874.31	872.662	816.295	866.754	829.17	800.072	719.997	654.365	598.368	527.485
1186	1	3	0.7	907.919	967.657	945.474	976.845	976.287	964.332	949.461	926.673	902.688	887.886	874.965	863.731	848.563	835.034	824.687	813.65	811.971	903.683	889.329	874.225	863.151	854.091	855.833	851.849	844.798	878.087	886.081	880.939	877.646	867.972	850.786	827.487	801.619	782.422	770.006	945.318	934.539	980.852	963.291	965.03	955.056	953.484	938.878	914.87	889.077	866.316
1042	1.5	0.5	0.1	1481.95	1513.1	1543.86	1576.13	1573.47	1562.35	1542.08	1519.35	1496.38	1478.9	1466.39	1455.8	1442.45	1443.34	1443.4	1440.25	1438.21	1451.8	1440.28	1423.22	1405.58	1392.66	1391.79	1385.68	1404.46	1569.73	1629.01	1620.97	1609.75	1611.15	1598.27	1577.52	1559.15	1542.22	1535.46	1787.24	1778.66	1730.73	1709.44	1721.61	1729.52	1704.79	1696.52	1676.98	1657.6	1656.68
884	10	1.5	0.8	853.951	844.487	845.041	843.836	845.172	843.831	844.874	850.834	859.174	858.368	858.912	859.475	857.113	857.636	857.912	857.892	858.903	857.614	858.355	862.728	864.618	861.509	861.047	863.626	861.9	863.866	861.134	862.018	860.85	862.646	862.256	861.338	861.261	855.952	852.435	851.216	850.656	856.897	854.252	856.304	858.576	851.512	855.834	852.54	851.94	852.319
1273	4	1	1.5	231.264	231.497	230.74	230.84	239.428	231.423	230.87	229.731	229.177	231.316	231.707	245.355	230.66	230.737	235.794	230.322	230.571	237.388	230.108	230.878	231.052	253.05	230.974	230.49	230.724	232.234	231.003	229.916	268.119	230.076	229.6	230.222	230.592	230.722	230.894	230.889	231.119	231.892	230.389	229.971	230.419	230.576	230.818	230.995	231.115	231.169
961	0.1	1.5	0.4	0	0	0	0	0	0	0	0	0	0	0	0	0	0	0	0	0	0	0	0	0	0	0	0	0	0	0	0	0	0	0	0	0	0	0	0	25.8422	68.0898	114.374	238.496	287.119	314.329	327.02	333.429	339.189	346.75
1144	8	1.5	0.2	889.252	887.419	869.983	880.78	878.365	876.233	883.6	890.248	888.322	928.271	880.884	893.689	879.225	883.851	878.797	880.238	879.851	1004.51	875.934	883.833	885.924	1060.74	944.073	870.746	884.735	1204.92	864.405	879.86	1076.23	999.489	864.105	878.525	879.218	883.171	883.097	1105.76	858.187	903.053	888.685	869.65	870.346	866.536	880.6	880.822	883.544	882.082
616	9	7	0.8	707.25	650.544	271.589	238.724	533.797	519.664	178.66	325.287	657.285	683.68	716.527	683.141	690.326	716.659	682.355	687.887	696.15	704.32	712.829	699.011	689.937	694.8	714.854	729.251	675.41	700.012	704.036	717.394	715.069	706.434	714.184	639.648	731.809	738.677	738.722	735.524	733.9	704.177	723.793	721.333	738.147	743.859	705.464	731.549	741.459	740.123
911	1.5	0.6	0.6	1163.9	1363.17	1494.25	1502.2	1500.23	1499.98	1465.24	1382.55	1310.64	1226.08	1141.33	1061.99	989.601	928.677	905.202	852.566	797.218	734.041	695.486	656.871	609.536	562.571	533.587	540.906	520.246	616.812	1307.22	1539.82	1613.09	1745.72	1509.14	1499.42	1499.77	1501.23	1504.5	1614.9	1503.1	1712.54	2171.38	2171.4	2171.4	2171.4	2148.83	1927.52	1575.01	1499.66
1006	1.5	0.5	0.1	1263.13	1295.02	1333.25	1371.13	1368.49	1358.01	1335.75	1310.36	1288.22	1270.47	1260.94	1256.53	1244.57	1249.8	1257.77	1250.68	1266.7	1332.49	1366.94	1363.21	1353.53	1352.88	1430.28	1439.27	1448.55	1515.24	1467.79	1441.9	1436.58	1443.57	1426.71	1423.9	1437.25	1420.88	1416.23	1534.16	1466.74	1441.92	1439.14	1488.4	1521.41	1456.85	1436.65	1418.25	1399.85	1436.73
1048	5	2	1	220.345	316.135	467.449	777.444	771.489	763.877	638.446	518.387	433.239	361.341	300.926	251.868	207.739	199.867	200.238	199.973	200.888	204.082	201.267	202.223	202.459	202.727	286.967	253.369	202.25	447.119	415.05	301.668	421.058	766.888	625.666	494.654	402.965	320.458	252.302	216.071	204.439	268.565	296.513	694.722	581.235	753.6	709.986	620.969	537.615	532.276
1123	1.5	0.1	0.1	1389.71	1394.01	1381.9	1381.97	1382.29	1381.66	1380.8	1379.92	1382.4	1418.01	1382.77	1397.25	1383.62	1384.56	1384.06	1381.92	1384.88	1398.63	1381.82	1382.14	1381.83	1382.36	1382.48	1383.01	1388.62	1436	1403.26	1381.86	1426.45	1452.99	1396.98	1381.9	1382.06	1381.72	1382.43	1482.61	1460.61	1421.96	1405.32	1383.56	1436.31	1401.18	1382.18	1381.84	1382.32	1382.21
1032	3	5	1	210.196	247.351	267.781	344.828	261.815	208.895	189.516	190.147	190.295	190.596	190.725	191.079	190.992	190.858	190.999	190.591	198.787	211.992	190.316	190.632	190.662	191.883	268.001	218.709	194.322	291.357	222.812	192.548	283.8	544.974	396.239	328.371	281.147	239.292	204.423	208.729	236.621	321.218	297.826	489.832	465.491	436.787	368.167	308.029	262.29	279.675
1774	6	10	0.9	520.535	565.234	653.618	518.206	484.945	462.299	439.34	413.257	388.365	364.048	339.767	318.901	299.179	359.101	457.52	536.569	526.097	598.589	537.071	493.922	453.076	412.524	378.63	357.601	492.82	592.276	610.506	479.883	437.461	422.784	402.44	382.854	398.558	365.283	384.457	552.97	676.891	668.256	606.227	683.203	699.697	656.231	606.188	571.524	532.166	493.127
1781	5	0.6	1	1068.36	1266.06	1263.2	1259.28	1283.45	1240.35	1194.96	1108.13	1010.88	915.703	825.389	762.4	654.494	873.525	1259.71	1267.91	1221.7	1274.43	1200.04	1085.69	972.229	862.352	756.052	621.129	813.94	1267.57	1268.61	1284.36	1274.5	1288.04	1224.04	1177.97	1094.51	990.517	946.402	1192.84	1276.28	1263.51	1261.93	1255.02	1262.91	1309.53	1281.66	1202.96	1105.44	1004.12
355	0.2	0.5	0.6	1760.6	1760.6	1760.6	1760.6	1760.6	1760.6	1700.76	1578.52	1512.11	1479.41	1557.54	1715.58	1760.6	1760.6	1760.6	1760.6	1760.6	1760.6	1717.55	1607.22	1524.3	1485	1468.11	1553.6	1661.37	1741.81	1760.6	1760.6	1760.6	1760.6	1727.8	1619.62	1544.69	1515.04	1612.56	1752.18	1760.6	1760.6	1760.6	1760.6	1760.6	1760.6	1743.32	1653.64	1633.75	1729.35
1101	1.5	0.8	0.6	1102.78	1154.99	1330.64	1579.7	1520.65	1398.33	1262.68	1160.64	1095.7	1039.05	1006.05	1054.24	1039.48	1084.48	1104.35	1145.35	1119.85	1100.65	1070.41	1020.21	970.177	920.267	875.559	834.949	830.164	927.424	985.566	1055.94	1066.43	1033.57	987.895	938.951	891.148	846.669	808.354	1174.28	1478.22	1532.49	1467.84	1540.8	1609.06	1626.48	1489.84	1340.65	1206.93	1134.92
1023	7	8	1	274.242	363.408	495.93	476.235	401.757	531.555	412.099	375.825	364.564	352.656	338.57	327.977	313.802	301.728	291.108	279.378	273.145	276.158	251.589	218.517	188.445	162.738	192.753	176.067	162.409	191.904	195.641	172.565	167.289	193.771	180.427	161.396	162.105	162.472	162.838	162.956	162.83	172.273	187.956	535.764	510.331	509.169	490.135	488.289	470.859	454.707
1060	1	1.5	0.7	436.818	453.968	477.576	505.936	488.723	479.223	462.246	442.027	425.216	414.109	403.482	427.403	414.361	428.015	447.502	443.55	463.557	489.958	477.404	475.13	467.012	463.512	526.603	521.155	529.115	610.992	564.273	551.242	539.114	552.108	545.674	525.281	507.552	491.649	486.78	665.031	579.026	600.043	583.735	589.555	629.653	584.045	567.391	548.683	531.439	518.511
1864	1.5	1.5	0.5	626.786	598.763	804.643	969.087	822.7	698.108	604.972	572.934	545.829	535.85	536.532	587.104	595.113	594.826	594.312	594.367	594.046	592.333	576.876	551.782	527.95	504.032	482.893	466.996	512.269	594.288	594.535	655.465	607.208	589.641	580.785	578.624	595.283	594.673	599.3	1036.97	1374.82	1461.06	1461.48	1479.97	1465.27	1408.6	1261.13	1099.31	950.716	824.97
1797	8	3	0.5	452.121	422.557	383.745	357.181	463.566	479.746	495.797	503.141	509.822	507.847	507.877	506.379	506.315	472.172	443.117	464.751	473.15	486.205	462.923	489.471	480.406	448.854	426.304	494.003	509.674	385.689	426.142	473.209	493.551	494.866	500.896	501.041	505.058	508.285	501.801	449.687	435.422	425.803	416.991	420.443	451.1	458.836	497.194	510.039	509.329	512.23
305	0.9	1.5	1	403.39	169.41	250.532	375.44	535.57	1416.39	1414.22	1100.55	571.842	407.669	465.957	518.062	385.382	264.912	306.489	420.796	500.467	462.015	165.059	119.142	124.326	273.494	274.101	436.135	148.142	545.493	1424.7	1424.7	1424.7	1424.7	1417.92	1100.93	510.521	492.489	464.29	491.792	516.793	326.132	438.532	366.103	388.495	370.537	476.21	176.672	131.317	127.522
968	5	2	0.3	563.01	563.241	566.183	701.189	598.372	560.342	562.276	562.651	562.615	562.633	562.498	562.592	562.701	562.718	562.556	562.649	577.564	562.358	562.911	562.982	562.786	562.733	562.626	562.639	562.717	562.643	562.154	562.338	564.55	560.877	561.984	562.846	563.018	563.087	563.115	563.148	563.248	563.274	567.236	587.242	562.013	561.302	561.391	562.727	562.691	562.458
1019	1.5	0.4	0.1	939.267	953.458	986.733	988.654	977.258	974.709	969.825	963.57	957.12	951.068	945.631	940.546	934.57	934.882	946.847	948.418	957.88	983.028	978.033	978.841	976.247	972.144	968.311	963.634	967.564	1022.29	1049.49	1025.04	997.665	978.78	974.815	969.658	965.832	961.111	956.651	1063.65	1104.97	1089.73	1075.24	1106.42	1158.08	1125	1093.71	1060.99	1029.35	1000.05
1302	5	2	0.7	552.795	553.859	553.949	553.667	552.768	549.886	542.06	537.239	542.746	555.544	556.99	555.643	556.398	555.499	559.05	554.75	554.783	629.897	547.975	538.829	543.009	548.498	555.623	556.109	556.202	556.101	555.196	553.855	554.275	551.468	545.336	541.514	538.317	537.289	537.446	540.042	545.213	554.427	556.513	550.036	545.096	545.757	544.254	542.697	540.678	540.679
1824	9	0.7	0.1	437.307	431.361	675.141	598.483	462.112	524.702	506.075	505.076	508.256	552.708	532.307	594.678	557.077	446.48	509.915	483.656	504.392	566.811	506.204	513.74	514.359	517.188	518.269	548.994	373.631	392.418	493.886	514.887	492.686	509.974	505.857	508.351	508.75	510.821	519.049	383.234	544.271	429.142	444.734	407.66	469.602	516.369	501.314	507.83	511.723	510.024
1316	9	0.1	0.6	0	0	0	0	0	0	0	0	0	0	0	0	8.23723	20.8561	40.9269	69.3936	129.715	181.302	202.25	186.565	183.596	181.011	186.022	180.009	173.949	168.649	165.176	157.374	151.2	144.051	136.996	131.061	127.058	124.375	122.492	119.43	115.969	113.717	111.828	109.514	107.058	105.843	104.562	101.825	99.1346	97.5045
1835	9	0.7	0.1	427.254	435.8	699.472	571.635	566.445	549.41	507.817	492.917	495.129	519.134	505.347	515.063	533.96	426.632	490.073	491.089	488.391	592.377	499.528	499.926	501.544	503.953	504.484	573.065	424.537	369.923	495.868	499.269	566.828	548.887	501.214	495.112	496.256	499.311	507.638	393.828	448.285	456.743	425.317	447.555	425.16	730.615	600.857	494.591	496.466	498.926
1847	7	1.5	10	4.33252	0	79.1329	13.3308	4.45841	0.0565153	0	0	1.78579	3.34229	9.30118	41.9426	14.5514	6.52764	0.175512	0.37736	0	15.6275	0	0.305752	0	0.31145	0.326695	56.3713	1.12408	0	0	0.891309	0	0	0	0.0323617	0	0.00683201	16.5779	0	0	0	0	0	0	0	0	0	0	0.00130329
1231	0.8	9	0.8	425.344	483.346	485.837	488.658	490.463	481.949	464.286	446.13	429.303	415.354	402.172	390.944	378.675	367.662	357.724	347.635	344.717	471.083	444.652	431.723	422.439	418.964	444.725	454.827	455.239	467.001	474.073	473.216	473.48	471.887	464.595	450.548	434.931	420.909	411.356	472.163	440.522	465.517	502.375	507.049	507.204	511.778	506.616	495.208	482.174	467.802
1140	2	0.8	0.1	872.5	870.627	867.528	863.82	861.236	859.152	855.425	851.865	848.495	847.053	844.788	844.872	842.342	839.737	838.148	834.953	832.237	829.94	826.297	823.027	819.939	817.244	814.678	812.19	809.654	807.317	804.56	801.156	800.505	802.443	804.756	800.572	797.197	794.124	791.372	789.727	789.449	802.787	800.954	798.868	795.338	792.538	789.101	785.423	781.892	826.741
1296	0.9	2	0.9	737.95	724.481	695.194	671.407	649.994	625.516	597.768	572.332	549.832	530.073	511.609	502.805	496.817	494.451	490.608	484.503	479.635	498.255	486.513	477.717	472.548	468.524	490.785	485.332	481.319	478.951	476.625	473.781	488.286	484.432	477.293	469.523	462.801	457.921	454.021	472.665	471.168	495.186	504.012	499.928	505.822	496.215	486.644	480.852	475.727	470.633
1659	1.5	0.8	0.1	683.688	687.539	729.898	747.399	744.168	738.084	726.031	714.499	703.086	690.542	678.355	668.012	658.55	674.867	676.569	679.845	705.6	714.838	708.209	703.677	734.364	725.163	719.471	714.286	720.203	785.903	910.295	896.528	884.139	882.976	875.634	863.239	849.718	836.286	828.448	875.368	881.983	885.77	894.027	906.443	905.996	891.824	880.003	869.936	857.551	853.425
1277	2	0.2	10	872.599	874.307	874.495	874.854	879.637	873.887	870.172	865.602	862.581	862.141	861.408	869.66	873.773	875.22	876.029	875.48	874.967	887.354	877.346	874.105	874.827	874.957	875.036	875.034	874.683	874.827	874.835	874.91	875.272	874.38	873.492	871.18	869.179	867.664	866.826	867.467	870.306	875.222	875.523	874.903	874.978	875.007	874.474	872.734	870.706	869.609
1021	3	4	0.2	488.788	481.631	482.591	476.849	482.648	483.379	483.913	484.7	485.478	485.193	485.918	485.104	485.059	483.912	482.822	477.945	474.342	476.621	470.996	463.37	458.325	457.138	483.209	482.853	485.579	489.958	478.629	483.155	488.114	479.39	482.469	483.977	485.024	485.082	485.764	485.764	486.272	485.583	515.885	471.423	479.354	481.102	482.392	484.358	484.988	485.679
1280	2	0.9	0.1	782.794	726.244	673.744	620.864	572.905	522.014	468.024	435.306	573.424	812.824	765.017	807.789	835.35	843.15	843.533	835.66	820.042	788.05	735.376	676.416	633.004	628.851	643.334	606.362	576.474	553.777	527.196	495.353	483.624	483.915	483.478	482.499	483.561	483.593	483.662	483.662	483.656	483.522	483.49	483.518	483.309	483.391	476.578	465.942	455.681	452.417
1120	5	1.5	0.7	407.81	408.594	408.101	406.941	406.354	404.294	398.456	393.206	389.587	387.444	385.518	384.489	382.269	379.828	377.993	375.079	372.315	369.406	364.361	360.528	357.94	356.314	355.099	353.106	350.837	349.777	348.562	346.959	359.239	389.551	393.577	396.797	398.374	399.811	401.015	403.194	404.313	406.002	408.019	410.495	411.833	413.008	410.238	405.297	400.967	423.327
182	8	0.1	0.7	859.194	769.667	743.958	751.658	759.45	761.415	748.83	746.247	753.908	762.223	762.006	756.726	763.21	757.567	757.487	755.377	754.898	737.474	600.259	543.775	547.747	555.966	625.265	754.215	730.259	782.693	747.581	752.595	749.029	754.865	737.529	692.115	713.351	740.764	766.043	756.389	749.752	734.97	745.369	735.82	748.367	752.575	762.543	758.08	757.857	758.361
7311	2	0.1	0.1	733.364	736.703	735.805	738.113	733.376	733.354	733.558	733.462	733.422	733.48	733.373	733.521	733.319	733.811	733.393	733.307	733.532	733.515	733.334	733.354	733.45	733.54	733.726	733.824	733.996	737.117	733.4	733.307	741.102	749.769	732.98	733.313	733.302	733.393	733.377	733.393	733.448	743.556	734.884	759.356	733.291	733.185	733.377	733.38	733.386	733.429
1755	1.5	0.8	0.1	513.099	539.139	612.942	669.662	655.739	639.098	615.473	587.291	558.595	530.597	505.238	488.279	472.809	550.856	563.003	565.609	561.606	655.022	635.505	609.429	584.38	558.14	537.048	564.775	667.553	726.407	708.172	700.041	695.66	678.986	653.171	626.731	664.888	630.362	602.895	638.888	687.716	715.83	688.991	725.117	839.025	921.845	854.073	781.001	712.358	677.778
1152	4	0.9	0.3	0	0	0	0	0	0	0	0	0	0	0	0	0	0	0	0	0	0	0	0	0	0	0	0	0	0	0	0	0	0	0	0	0	0	0	0	0	0	0	0	0	0	0	0	0	0
1192	7	1.5	0.6	369.593	381.241	364.042	364.651	364.95	365.121	366.304	367.556	367.495	367.579	367.807	367.663	367.541	367.674	367.233	367.362	367.122	371.212	365.885	367.575	367.867	367.914	368.025	367.806	367.615	366.687	366.353	366.894	367.587	367.079	364.564	359.641	350.733	347.467	350.15	398.735	422.19	404.946	368.455	365.354	366.481	367.068	367.204	367.53	367.631	368.827
541	1	3	2	90.8324	90.8315	91.0639	91.4841	327.217	64.5196	83.2333	89.5669	89.7229	90.3071	90.6063	90.5596	91.0671	91.1442	91.091	123.268	128.083	85.1928	90.0807	90.8043	90.995	91.2009	91.2171	91.2459	91.3259	91.3774	91.3611	95.2832	252	73.7827	87.1856	89.8365	89.9576	90.3309	90.7297	90.8436	91.0655	91.3241	91.2227	91.7703	239.78	107.609	81.1491	89.8087	90.1578	90.4162
1822	10	0.8	0.3	299.212	287.381	243.935	268.669	390.363	326.317	329.327	332.89	334.449	333.582	334.729	333.572	336.944	284.316	363.741	375.834	367.079	421.574	334.601	338.205	339.603	340.566	341.326	357.477	299.575	255.715	271.7	313.871	359.904	330.657	330.769	332.811	332.392	332.614	343.524	273.979	299.882	299.652	286.077	279.067	321.517	294.36	329.044	332.388	335.454	335.867
972	8	1.5	0.4	373.324	391.969	437.727	541.559	358.111	360.211	360.816	361.274	361.58	361.958	361.995	362.422	361.171	358.408	354.849	351.492	365.555	365.124	361.705	361.982	361.553	357.931	354.066	350.974	347.688	352.465	364.134	361.531	361.713	361.734	361.729	361.856	361.711	360.069	355.937	351.459	346.517	348.193	365.117	509.604	445.388	406.833	372.199	361.676	361.438	359.139
613	3	0.2	10	613.889	614.338	611.264	638.036	872.95	887.517	638.707	554.105	537.758	561.73	613.529	614.268	614.18	614.447	614.656	610.929	610.509	609.485	559.51	500.846	462.248	450.475	454.861	458.32	463.406	489.993	587.996	611.997	609.119	607.56	564.748	501.491	469.87	462.357	475.82	519.729	559.953	606.903	614.372	614.12	609.708	632.903	591.924	543.059	503.101	491.982
1086	0.4	8	0.5	255.884	253.822	251.579	249.019	245.404	238.856	228.681	218.208	210.552	205.181	202.031	200.198	198.131	196.135	194.376	192.103	188.719	183	175.463	167.939	161.324	157.047	154.833	153.308	151.798	150.46	149.123	147.185	143.103	134.806	124.274	115.767	110.729	108.173	107.114	106.553	106.187	112.403	118.387	124.094	118.813	110.892	100.682	91.4659	87.6574	86.9758
1295	4	5	0.8	309.022	338.633	336.65	344.324	342.315	334.318	322.589	310.865	301.172	296.354	291.328	290.853	289.891	299.517	295.656	289.709	293.71	327.02	329.48	319.054	316.916	312.811	336.777	325.414	327.72	333.766	341.931	345.397	340.672	327.788	320.907	314.158	304.954	302.433	319.69	333.753	340.148	341.632	331.243	332.398	334.31	313.628	305.841	305.509	305.335	301.21
1139	1.5	0.7	0.1	583.876	582.724	579.197	572.874	566.538	558.995	547.636	537.002	532.126	563.356	567.362	587.619	586.063	586.532	608.025	594.95	590.468	590.461	583.735	576.676	571.034	618.394	633.828	624.211	613.892	612.217	607.908	597.829	618.99	653.285	669.834	656.954	645.666	634.802	624.085	618.538	617.46	617.126	611.147	604.806	594.037	589.416	582.584	573.988	565.715	565.506
1862	0.3	0.7	0.2	826.5	826.5	826.5	826.5	826.5	826.5	826.392	816.514	788.902	773.741	800.555	825.445	824.654	826.5	826.5	826.466	822.358	823.991	801.02	763.531	717.617	664.916	614.448	556.506	804.968	826.5	826.5	826.5	826.5	826.379	817.553	802.978	773.89	746.128	757.485	826.5	826.5	826.5	826.5	826.5	826.5	826.5	826.165	814.968	792.134	760.844
629	7	0.1	1.5	43.1253	184.45	3.8828	25.8054	153.99	176.156	17.035	34.0459	35.2264	36.0167	36.535	34.4756	36.1853	35.1636	37.2547	33.5557	35.2086	35.2011	35.4685	36.0438	39.4204	36.7192	37.8346	37.8224	38.8887	38.4062	36.0999	33.5658	33.7075	35.0106	37.2836	42.955	44.6096	43.5348	43.8853	42.2816	39.7236	38.8278	45.407	40.7039	44.2056	45.1581	44.8796	73.2305	47.0341	45.9514
1000	3	0.7	0.1	423.068	446.623	473.37	493.651	487.964	477.471	462.992	446.527	430.639	417.006	412.321	425.665	417.558	429.629	440.56	430.642	461.021	529.341	547.977	538.709	526.894	516.019	537.426	548.725	555.924	571.502	548.087	546.118	535.954	552.073	541.371	528.393	521.818	506.451	495.095	570.433	546.307	547.565	538.943	578.758	558.639	549.745	537.247	520.92	505.006	518.606
7306	0.2	0.1	0.1	789.7	789.7	789.7	789.7	789.7	789.7	789.7	789.7	789.7	789.7	789.7	789.7	789.7	789.7	789.7	789.7	789.7	789.7	789.7	789.7	786.084	733.915	667.226	783.359	789.7	789.7	789.7	789.7	789.7	789.7	789.7	789.7	789.7	789.7	789.7	789.7	789.7	789.7	789.7	789.7	789.7	789.7	789.7	789.7	789.7	789.7
991	3	0.1	0.1	537.581	545.222	538.606	545.554	535.922	536.697	537.042	537.205	537.113	537.286	536.652	537.458	536.573	536.878	536.642	536.803	537.764	536.455	536.878	537.226	536.982	537.026	547.86	539.46	536.742	546.358	535.763	536.166	536.388	541.001	535.694	536.404	536.683	537.016	536.892	537.27	537.338	537.157	537.023	643.406	535.851	535.712	536.426	536.701	536.913	536.965
7317	0.4	0.1	0.1	719.922	750	750	749.989	749.894	748.134	744.091	732.114	716.933	700.832	683.692	668.448	653.857	714.533	748.676	749.905	747.365	741.886	728.928	711.128	692.147	670.95	652.835	653.262	743.237	750	749.999	749.982	749.169	744.507	733.927	724.011	713.281	699.742	686.414	747.934	750	750	750	749.985	749.974	749.815	748.748	742.91	732.955	721.135
998	8	0.4	1.5	508.363	503.281	507.836	502.376	487.763	458.236	377.927	350.716	387.347	475.07	505.391	507.454	506.828	510.321	507.165	504.639	505.918	450.06	312.115	147.723	75.7997	74.8024	73.3981	73.5739	73.7048	73.7509	73.4149	73.4375	74.0523	72.4469	72.1659	71.4332	71.7907	72.1834	72.281	72.2064	72.4005	73.1443	78.4943	93.017	69.7033	69.2002	70.0557	70.4143	70.4303	71.3335
1716	6	1.5	0.7	215.357	241.877	308.603	292.583	273.17	263.242	250.467	233.305	217.532	204.948	196.438	200.178	195.144	247.77	247.704	238.744	278.801	291.578	256.439	247.004	235.91	222.723	214.407	210.842	291.931	391.779	342.062	293.633	283.329	286.702	274.153	255.765	243.299	232.908	221.559	438.26	337.378	305.344	293.287	316.764	454.475	349.209	285.774	268.687	254.736	290.688
1896	10	0.9	0.9	328.837	402.843	426.937	296.363	216.299	268.64	255.274	231.245	211.726	235.527	221.095	213.945	188.449	355.641	427.081	447.836	402.279	381.659	321.232	275.563	233.625	188.838	163.57	149.133	292.394	441.335	433.925	417.637	365.557	326.476	308.224	295.39	250.477	232.618	205.671	349.864	359.644	434.073	459.901	455.802	384.761	383.683	350.983	315.947	306.67	267
1883	5	0.2	0.1	509.895	496.188	510.697	493.507	501.848	502.301	503.571	505.048	504.892	501.619	505.384	504.359	503.272	529.203	499.245	503.183	501.754	504.904	501.36	500.153	492.364	483.032	477.85	476.934	522.664	512.524	500.101	501.848	502.075	502.532	502.109	502.652	496.791	497.733	498.13	506.59	511.425	502.452	497.37	500.665	498.842	503.62	502.328	500.807	503.641	497.179
1285	3	0.5	0.2	479.851	478.711	478.387	480.177	490.981	481.217	479.122	476.589	474.119	472.232	470.121	478.41	481.961	484.07	483.924	483.501	483.645	529.507	489.702	482.528	483.222	483.746	483.772	483.949	483.537	482.975	482.083	480.874	483.024	482.2	481.06	478.559	475.665	472.777	470.356	468.987	470.438	486.825	484.071	483.409	484.245	483.522	482.94	481.808	479.987	478.02
1266	6	10	1	127.523	134.622	131.875	131.752	135.52	133.569	128.04	123.789	119.977	117.666	115.437	113.919	111.298	109.807	108.803	106.855	106.217	107.511	107.284	103.703	103.154	102.769	102.836	101.34	99.6137	98.8081	97.9342	97.8464	100.552	99.0823	96.4361	93.1319	89.8746	87.9729	87.9657	101.366	99.0754	125.449	133.608	126.91	131.43	133.52	125.842	124.506	123.393	121.139
1176	4	1.5	0.7	369.716	338.354	311.657	285.631	271.964	271.571	272.692	272.825	287.636	404.348	356.637	432.107	377.496	352.69	345.314	315.477	294.333	275.934	273.156	272.142	268.44	275.89	269.732	262.253	257.562	261.595	261.638	255.904	286.417	316.376	313.72	274.605	272.973	272.545	268.555	265.221	265.395	294.959	269.915	271.681	269.83	273.478	273.069	273.248	270.095	288.783
924	1	0.3	0.1	487.62	478.521	485.951	493.798	477.375	482.415	473.98	473.116	478.773	475.727	477.219	493.695	495.609	495.514	507.392	499.192	488.756	478.065	509.902	552.534	529.096	509.921	496.414	486.552	476.308	509.51	607.477	649.644	664.482	679.851	679.673	674.24	671.042	661.976	668.483	680.001	678.717	678.771	678.314	679.842	675.826	662.232	638.917	609.593	584.863	563.281
758	1	1	1.5	105.33	78.3678	65.8339	65.7615	65.9205	66.7215	66.3169	70.903	68.395	66.407	66.493	66.2658	66.2262	66.2788	66.5018	66.694	66.8704	73.0181	76.8822	71.5548	72.5482	84.1014	70.8457	66.653	66.8256	66.5176	67.0386	69.7454	71.4241	66.5854	69.3909	66.3415	67.376	74.0345	67.052	66.0009	65.9783	65.905	65.817	66.2224	66.9033	70.3666	70.8423	66.6288	67.2134	67.4511
1257	0.7	8	0.9	0	0	0	0	0	0	0	0	0	0	0	0	0	0	0	0	0	0	0	0	0	0	0	0	0	0	0	0	0	0	0	0	0	0	0	0	0	0	0	0	0	0	0	0	0	0
895	10	2	0.9	152.14	138.159	135.981	132.269	133.108	139.621	136.86	115.442	156.813	157.605	156.83	157.36	159.492	153.929	158.212	160.607	157.525	161.958	159.06	159.329	169.472	170.917	170.575	168.886	162.249	172.929	169.06	164.917	152.648	157.002	154.274	159.155	153.732	159.55	151.435	155.557	153.883	154.094	143.522	141.059	126.479	127.254	140.131	146.506	143.474	144.489
1317	1.5	4	1.5	65.2676	65.3438	64.7977	65.1251	76.8129	73.3351	62.1218	156.006	73.7909	64.8206	65.064	65.1965	65.0681	65.1981	65.4275	65.5082	70.4643	89.5651	72.919	65.2129	66.1552	71.5586	70.1973	65.0095	65.1114	65.7987	65.4091	65.2413	65.4225	65.1839	65.2225	65.2573	65.2429	65.5109	66.1317	65.2393	65.2804	65.7528	65.7099	64.7383	63.7853	64.6832	70.7281	67.0884	65.8684	68.69
1242	5	1.5	10	0.0201974	0.39941	0.46877	0.0147741	0.289806	0.340724	0.222137	0.631185	18.5436	3.23517	0.129762	1.54811	1.92349	0.499386	0.000881337	1.30801	0.591391	0.0105352	0.242321	9.13576	24.0897	12.8539	8.46826	7.72703	7.54826	8.40284	5.4764	3.38584	2.81173	2.68862	3.17278	3.42307	3.35301	3.89471	3.97147	8.06095	36.3796	30.9784	2.88877	9.02027	2.51192	0.0571252	0.0351415	0.245019	0.657057	3.74449
107	0.5	0.1	7	572.626	616.457	616.697	616.64	614.836	604.8	568.248	497.383	448.087	431.095	431.197	449.905	475.832	536.934	594.138	615.844	608.626	592.593	536.432	455.912	412.392	406.433	421.811	581.078	616.7	616.7	616.7	616.7	616.658	612.38	594.008	543.438	504.66	485.106	468.481	551.749	616.542	616.693	616.7	616.7	616.69	613.231	598.525	558.208	526.827	507.53
1841	2	2	0.5	243.677	237.149	295.724	238.668	230.209	230.533	231.192	230.862	228.759	225.96	221.411	220.447	216.728	260.612	226.726	233.273	219.828	228.799	224.412	218.674	212.062	203.563	195.954	198.055	274.08	293.418	225.48	229.039	230.376	230.991	229.651	227.664	221.973	215.306	213.185	277.513	226.318	239.96	231.185	234.724	235.715	230.482	231.244	231.341	229.583	225.053
907	2	4	1	114.202	139.001	172.795	197.225	164.933	134.923	98.1135	68.6357	62.1354	55.9676	55.1852	55.3372	55.41	57.8975	63.6146	61.3208	55.4216	55.5202	55.453	55.5981	55.3623	55.4382	55.5478	55.4538	55.5087	71.2818	162.569	119.375	140.06	190.489	148.808	123.17	94.8113	74.8972	96.6262	180.213	170.929	192.157	202.795	159.689	48.8905	49.8846	59.3425	52.9603	54.3571	77.4954
80	0.7	1.5	0.2	525.655	553.022	558.589	556.399	524.722	495.861	418.228	277.323	221.045	218.794	231.375	291.058	347.931	322.286	420.217	526.899	526.693	541.685	471.203	359.682	235.474	223.272	233.012	485.855	543.024	555.312	559.09	560.242	549.832	505.276	444.41	319.872	224.408	225.393	232.483	349.58	533.27	557.142	557.359	552.151	541.462	517.046	506.658	419.318	289.374	221.158
1236	0.2	0.7	0.9	223.335	220.817	218.43	215.351	211.287	201.561	183.136	164.379	154.282	150.699	147.727	146.422	145.906	144.582	144.477	145.038	143.107	139.006	128.542	115.005	107.543	118.641	119.692	118.643	118.684	119.376	120.498	121.021	121.058	121.781	118.606	107.328	100.203	97.4707	96.3574	95.3524	94.2371	93.7319	93.9362	94.5297	93.1072	88.341	78.7009	67.6411	60.7431	58.2913
981	8	1.5	0.2	212.042	213.988	219.259	295.127	209.225	210.162	210.815	211.014	211.008	211.073	211.05	211.161	211.036	211.101	211.202	211.188	212.36	211.214	212.331	212.531	212.563	212.627	212.662	212.558	212.586	213.975	212.354	212.374	212.438	212.498	212.356	212.147	212.218	212.316	212.268	212.259	212.279	212.617	212.71	216.861	211.898	211.992	211.763	211.793	211.729	211.816
1093	3	0.7	0.7	126.248	128.577	135.356	139.808	144.408	148.117	143.038	134.345	125.645	122.539	120.282	122.474	124.324	134.12	153.296	156.64	170.499	219.017	220.917	219.377	214.129	207.783	205.968	202.831	205.862	349.496	361.434	354.588	356.441	362.864	358.979	352.358	339.953	325.535	312.493	363.829	356.82	363.671	364.467	366.286	380.547	343.912	338.097	326.193	309.747	293.659
1709	0.9	0.3	0.1	390.974	428.784	499.241	508.836	507.232	500.597	481.912	457.964	428.732	394.874	363.412	355.288	355.537	375.333	404.299	426.586	440.725	497.82	495.876	472.234	441.419	411.056	386.428	374.824	396.971	499.056	509.533	508.086	493.935	500.055	498.049	477.484	446.202	411.141	381.604	374.387	365.622	390.974	425.783	482.453	508.627	503.842	488.858	462.827	428.335	393.389
1017	1.5	1.5	0.3	196.084	216.961	215.302	202.576	202.787	202.918	201.95	200.355	197.668	194.266	190.6	187.533	183.35	189.716	199.575	202.018	206.297	207.868	202.155	202.273	200.999	198.748	197.644	196.568	215.812	305.249	336.387	289.615	245.477	209.751	202.974	203.569	204.563	202.68	206.507	452.442	467.418	433.121	401.901	424.474	499.894	459.356	403.524	348.663	299.175	256.069
1194	0.7	1.5	0.7	193.119	196.203	199.786	201.485	201.833	200.027	194.584	187.971	182.424	182.722	183.422	184.824	186.468	186.371	186.952	188.172	188.646	188.418	185.406	180.586	177.051	219.628	221.191	201.382	201.592	202.74	201.41	201.501	224.593	219.564	206.231	201.476	201.565	201.724	201.765	201.763	201.499	201.165	201.327	201.715	201.348	200.453	197.393	193.335	189.483	186.174
[truncated: 434 more columns]

## Sheet: Outflow(WG inflow-With Demand)
grand_id	q1	q2	q3	1980-01	1980-02	1980-03	1980-04	1980-05	1980-06	1980-07	1980-08	1980-09	1980-10	1980-11	1980-12	1981-01	1981-02	1981-03	1981-04	1981-05	1981-06	1981-07	1981-08	1981-09	1981-10	1981-11	1981-12	1982-01	1982-02	1982-03	1982-04	1982-05	1982-06	1982-07	1982-08	1982-09	1982-10	1982-11	1982-12	1983-01	1983-02	1983-03	1983-04	1983-05	1983-06	1983-07	1983-08	1983-09	1983-10
610	0.7	0.9	4	1432.11	4583.12	3663.81	2124	3935.16	4905.39	2052.37	1500.26	1484.12	1556.25	1510.86	1555.91	1541.14	1378.83	1864.78	1614.59	1428.37	1316.6	1182.77	1002.62	955.595	987.012	954.864	986.427	986.391	1046.6	1652.49	1230.07	1105.87	1079.83	1064.62	994.975	949.662	980.387	948.338	985.394	991.456	970.539	2420.5	2006.42	1154.58	1082.35	1068.32	1035.85	1362.18	1464.94
1294	0.4	10	1	101.63	73.04	78.1472	75.5401	87.9561	90.4299	73.2342	59.1671	63.0429	90.7156	81.9876	130.987	111.015	110.232	180.97	218.28	187.431	312.614	309.247	186.972	168.828	174.151	196.358	174.707	163.425	150.424	162.823	129.836	116.181	111.755	101.739	96.6955	88.3301	87.0591	81.8753	90.1317	106.088	132.374	193.778	178.387	114.101	114.698	100.905	89.3758	78.4559	75.3155
1247	2	10	1	53.4428	66.4066	74.6274	60.4027	71.6697	83.8644	51.7097	37.1853	39.4333	365.097	114.301	268.767	163.126	94.2418	149.632	128.711	115.725	89.3782	93.6685	95.5553	87.5565	532.664	471.629	161.703	141.671	153.496	168.027	135.152	217.248	332.191	265.258	151.549	125.337	115.406	102.405	103.529	111.97	126.01	136.748	140.951	115.135	113.07	105.034	86.1633	76.4398	74.5689
1186	3	3	0.7	259.642	206.458	75.9479	144.664	120.181	57.726	46.2455	38.8846	33.015	32.6851	31.5959	33.004	32.5421	28.8247	33.1399	33.2015	36.5252	88.8711	56.2491	42.4337	37.2345	36.0488	38.1639	40.9378	38.9802	53.8208	58.3468	44.1968	42.7923	38.9565	35.9078	31.0883	27.0269	26.3136	25.6008	190.222	88.7491	230.046	161.629	73.3424	48.1388	45.8555	41.4994	35.4443	30.493	29.3728
355	0.2	0.7	0.2	156.851	131.712	191.812	601.144	727.867	202.397	72.4242	56.4422	42.4543	37.7035	37.9775	78.7394	157.411	170.486	247.067	512.332	1131.98	238.812	71.0261	62.5943	47.2073	35.9905	34.0515	39.491	40.9128	100.365	212.622	394.175	603.951	341.655	70.3025	62.5323	42.6766	35.973	38.7033	184.595	283.709	305.951	364.167	850.019	1500.75	535.933	80.6391	60.008	46.0029	108.348
1302	4	0.5	0.1	18.3488	13.5373	14.8592	14.4104	14.6941	15.8866	16.2223	15.2007	15.3045	17.7683	31.8934	37.1012	37.8134	33.6597	73.6069	43.2296	33.8322	269.255	33.0584	18.3478	15.8046	19.8481	23.4291	19.5343	19.0068	17.6466	15.6744	14.6878	15.3479	16.2591	16.1327	15.9289	14.2983	14.3745	13.8927	14.8107	15.7339	16.029	60.9411	19.472	15.6965	15.6502	16.0703	16.1482	14.5375	14.8662
1231	4	9	0.9	71.2053	94.0992	70.2382	55.8844	55.4397	49.2811	41.9668	33.9028	28.7221	27.7655	26.003	26.7458	26.0609	22.9506	25.4087	25.4029	30.2682	151.042	94.6544	48.8791	38.2867	38.7233	61.73	64.563	52.5916	52.3255	59.3189	49.5637	49.1004	47.6859	43.8465	35.9062	29.3447	27.2401	26.4961	209.662	84.7505	71.4513	112.171	69.2441	57.4404	54.3844	49.0875	41.3766	35.2943	32.7358
1140	2	0.8	0.1	2.72178	2.46069	2.64713	2.38717	2.48115	1.92772	1.70338	2.07316	2.39081	2.67927	2.45709	3.01531	2.66786	2.31285	2.73336	2.47918	2.42049	2.12981	1.74653	2.08301	2.20381	2.41821	2.3541	2.41419	2.40738	2.1683	2.39151	2.3067	2.7279	3.62451	3.75312	1.89019	2.08825	2.33844	2.27763	2.35844	2.83493	7.25768	4.0526	2.71761	2.3901	2.04052	1.77993	1.71972	1.97124	34.2787
1296	0.9	2	0.9	39.6183	53.0601	41.0586	36.0241	37.0222	36.3042	30.0102	26.997	24.5922	23.8446	10.6027	9.93837	9.94978	10.8402	12.7901	11.1522	10.8915	39.7078	23.2009	12.6461	11.0463	11.1062	29.1265	18.7513	13.9864	12.65	14.0329	13.116	24.8363	20.1972	13.1043	11.4538	10.3726	10.22	9.67236	27.4201	19.7305	39.4352	53.267	39.4221	46.1758	36.5172	14.7991	12.8545	11.2516	10.9134
1277	2	0.5	6	4.19784	4.04524	4.36127	4.1941	5.65681	5.85445	5.30994	4.98446	4.20098	4.11836	3.87543	5.37476	4.93853	4.82101	6.10698	6.29457	5.30984	23.1517	19.2462	5.37652	4.60202	4.47787	4.17648	4.22323	4.14252	3.87264	4.41589	4.33294	5.34851	5.25325	4.88524	4.45691	3.99109	4.02324	3.83168	4.07907	4.5331	5.13948	6.29348	5.98238	5.07316	4.92877	4.89392	4.5953	4.10919	4.06603
1280	2	1	0.1	82.478	50.2745	52.6813	48.1177	49.3501	13.9805	4.36171	3.77435	128.66	213.273	88.9429	105.82	105.874	91.1707	110.474	94.8344	90.6474	80.9434	78.5431	68.3539	60.1307	80.0515	102.424	69.0948	65.7125	39.8061	31.8212	22.1904	34.949	24.9001	20.6584	7.71109	10.0481	13.2777	17.6423	16.2293	21.2854	34.7636	37.0222	19.8704	10.986	12.2738	5.52107	4.93537	4.26279	4.45875
182	0.7	1	0.5	247.655	590.954	219.571	126.303	92.4809	89.2453	86.0012	79.6791	69.4592	93.6453	82.8763	79.2644	73.3545	99.6318	146.187	152.113	109.422	85.1482	37.95	32.3856	27.2351	26.0488	67.1485	197.166	115.101	436.155	408.012	488.086	159.073	93.043	95.7653	88.8421	79.3955	78.2722	181.182	459.627	395.371	510.561	695.356	290.288	149.093	101.19	95.0366	88.2823	79.6746	78.2893
1152	7	0.9	0.6	0	0	0	0	0	0	0	0	0	0	0	0	0	0	0	0	0	0	0	0	0	0	0	0	0	0	0	0	0	0	0	0	0	0	0	0	0	0	0	0	0	0	0	0	0	0
1295	0.7	5	0.8	31.9042	47.3488	36.1331	31.2599	33.335	27.3469	22.6734	19.2863	15.4149	14.7111	14.1132	17.6768	19.1822	25.068	22.734	18.1161	21.6276	40.8246	36.3167	23.8181	19.1122	18.406	76.5175	33.8409	27.0553	26.7009	31.1895	74.6372	81.4293	39.8273	27.325	23.2618	18.8575	17.7592	86.8513	148.955	64.2275	147.493	102.531	50.2953	93.5725	49.7828	25.2468	23.0938	21.1922	20.0597
629	9	0.2	1.5	1637.36	4565.65	4150.91	2076.87	3278.14	4812.65	2180.65	1779.43	1716.71	1792.24	1711.31	1719.35	1791.82	1565.34	1784.63	1651.43	1735.48	1610.45	1775.4	1586.26	1595.77	1602.82	1596.18	1678.23	1614.7	1492.2	1669.89	1544.45	1551.62	1502.67	1657.25	1435.99	1294.15	1361.68	1298.93	1569.56	1373.9	1298.67	1597.95	1273.08	1335.45	1224.68	1290.54	1676.91	1294.03	1502.58
1266	2	0.4	0.1	9.23319	22.4816	15.5386	12.9682	24.7093	9.36579	6.78586	6.45348	5.87319	5.84406	5.5036	5.57282	5.49211	4.9004	5.46277	5.39432	5.63007	5.55081	6.13542	6.14372	5.68465	5.74523	5.5743	5.82393	5.88253	5.36031	6.04587	5.93495	10.8957	7.48913	6.56699	6.28764	5.75708	5.71167	5.41669	29.5766	14.6202	47.8964	61.8935	41.3216	30.8979	28.1169	9.51713	9.95146	7.75187	6.10354
1176	2	0.4	0.1	9.71427	8.63731	9.36831	8.77654	9.37899	11.1203	13.63	14.5584	20.4661	101.519	135.998	152.471	75.3474	63.9329	77.9466	67.6484	27.81	27.3331	29.9514	21.9644	14.0847	46.6113	23.7581	12.1878	11.8558	21.8782	16.2013	11.6195	61.6385	113.267	108.87	86.2463	63.0323	17.4739	13.6162	11.8423	27.8117	86.7109	27.5999	18.3951	21.0967	31.563	34.477	26.9559	15.0459	42.3855
758	1.5	3	10	81.0424	76.3485	83.3875	78.6728	76.2716	64.8987	59.8543	91.7682	73.7477	59.3457	58.556	79.4845	62.3368	56.4996	62.4054	78.2538	61.6812	73.0537	47.7934	58.6598	47.2537	63.622	58.2298	47.8873	64.9816	46.314	65.4868	50.0036	78.4865	56.8524	103.714	64.8834	77.5498	81.755	86.7464	72.0111	93.4812	65.4822	70.3523	65.8127	63.196	74.4078	75.4098	72.5667	52.4756	86.9511
1242	4	1.5	10	11.4301	8.07723	8.80794	4.03592	2.92426	2.65722	2.35338	2.03585	237.158	349.276	51.6546	54.5651	54.8077	45.3026	41.6354	34.0263	22.0608	5.87539	5.03476	16.2542	40.0722	33.5706	15.5221	14.8729	14.0145	15.2265	10.8021	6.66142	2.89761	2.31149	1.96476	1.60828	1.29732	1.13861	1.13015	6.02313	147.71	137.904	49.7178	26.1199	16.7758	1.74369	1.11611	0.615471	0.338529	3.01788
1236	0.7	6	0.7	6.04827	5.37096	5.94908	5.84933	5.97293	45.8962	55.7312	29.9922	3.43914	3.34105	3.15414	3.95944	5.38172	4.81809	5.84659	6.8656	7.09391	6.59056	6.77625	5.58808	4.28843	12.2262	12.8617	8.1165	7.56331	6.81783	8.01691	7.82685	7.64265	12.1069	12.1454	8.95815	7.2149	6.32133	5.45173	5.16471	4.91307	4.60634	5.7921	6.7463	7.36477	6.89804	6.59959	5.45293	4.19869	3.68637
1194	1	2	0.6	22.8264	21.2441	24.0568	29.8058	43.6603	41.6512	39.9435	33.6464	9.0353	9.43531	9.84764	10.3667	10.8407	9.11008	9.98461	10.1957	10.2773	9.87608	10.2105	9.27182	8.03047	81.586	77.5719	20.9076	21.1121	29.53	24.7185	18.4674	70.8399	61.0481	24.6837	19.3432	13.0514	12.6382	11.1485	9.9955	9.70011	8.64027	9.81034	9.86016	10.0006	9.58709	9.58291	8.75091	7.71596	7.43075
[truncated: 434 more columns]

## Sheet: Storage(WG inflow-With Demand)
grand_id	q1	q2	q3	1980-01	1980-02	1980-03	1980-04	1980-05	1980-06	1980-07	1980-08	1980-09	1980-10	1980-11	1980-12	1981-01	1981-02	1981-03	1981-04	1981-05	1981-06	1981-07	1981-08	1981-09	1981-10	1981-11	1981-12	1982-01	1982-02	1982-03	1982-04	1982-05	1982-06	1982-07	1982-08	1982-09	1982-10	1982-11	1982-12	1983-01	1983-02	1983-03	1983-04	1983-05	1983-06	1983-07	1983-08	1983-09	1983-10
610	0.7	0.9	4	36346.6	36700	36700	36700	36700	36700	36700	36700	36700	36700	36700	36700	36700	36700	36700	36700	36700	36700	36683.2	36545	36434.6	36356.7	36298.7	36251.7	36222.4	36461.7	36700	36695.3	36553.8	36283.3	35994.5	35728.4	35550.1	35409	35305.5	35423.7	35832.2	36443.9	36700	36700	36673.7	36466.7	36247.9	36501.6	36700	36700
1294	0.4	10	1	1429.9	1375.02	1324	1276.78	1242.8	1199.84	1145.47	1087.69	1052.44	1029.77	997.391	1003.67	968.959	956.693	997.492	1015.18	1003.97	1164.12	1160.1	1125.49	1116.62	1117.57	1137.56	1121.52	1110.24	1106.75	1097.04	1063.76	1040.08	1012.38	979.611	947.145	915.981	887.322	860.558	841.127	828.941	847.827	866.623	855.241	813.291	798.304	769.949	742.344	715.457	691.307
1247	2	10	1	455.615	454.558	439.481	422.17	421.179	409.983	374.911	347.627	336.568	556.397	440.551	555.066	487.267	469.721	504.854	483.656	477.491	461.988	451.787	438.872	425.921	701.299	654.446	570.726	563.939	591.907	598.129	585.943	687.909	806.356	835.008	787.872	770.377	754.088	740.024	730.483	726.608	745.587	740.219	748.533	725.486	721.207	695.722	666.939	642.814	621.844
1186	3	3	0.7	982.726	963.443	941.435	977.769	973.803	960.515	945.802	923.268	899.634	885.178	872.588	861.671	846.797	833.524	823.423	812.618	811.161	903.065	888.86	873.943	863.098	854.269	856.236	852.476	845.629	879.1	887.286	882.319	879.166	869.592	852.476	829.281	803.55	784.482	772.192	947.76	937.402	984.109	954.421	963.378	953.611	952.236	937.814	914.018	888.452	865.909
355	0.2	0.7	0.2	1760.6	1760.6	1760.6	1760.6	1760.6	1760.6	1697.12	1572.7	1503.58	1471.7	1553.41	1715.78	1760.6	1760.6	1760.6	1760.6	1760.6	1760.6	1712.39	1595.64	1510.36	1471.92	1459.5	1549.76	1662.63	1745.09	1760.6	1760.6	1760.6	1760.6	1721.84	1605.32	1528	1500.66	1603.17	1750.42	1760.6	1760.6	1760.6	1760.6	1760.6	1760.6	1741.52	1649.59	1630.81	1728.99
1302	4	0.5	0.1	972.416	973.766	973.556	972.413	969.759	964.059	950.759	940.373	943.482	960.552	968.817	972.011	972.848	972.107	972.923	972.351	972.479	1010.52	958.144	959.28	964.049	969.995	973.015	972.95	973.768	972.522	971.285	969.467	968.577	964.83	954.592	946.785	940.849	938.198	937.267	939.253	944.86	960.763	971.923	970.692	967.82	966.854	963.096	959.081	955.083	953.832
1231	4	9	0.9	452.082	496.922	490.505	486.347	481.444	465.867	441.818	419.5	400.251	384.357	369.411	356.522	342.652	330.278	319.07	307.537	303.06	448.127	420.048	400.137	386.955	380.412	401.414	403.988	398.571	405.395	406.516	400.52	396.607	390.651	379.704	363.581	347.478	333.653	324.413	442.361	398.931	425.823	473.91	468.229	461.3	460.015	449.64	434.599	419.297	403.359
1140	2	0.8	0.1	876.512	874.479	871.221	867.396	864.747	862.887	859.806	856.837	853.632	852.076	849.647	849.568	846.875	844.111	842.364	839.006	836.162	833.899	830.666	827.858	824.924	822.167	819.446	816.798	814.099	811.607	808.695	805.131	804.322	806.176	808.76	805.042	801.903	798.798	795.899	794.097	793.661	806.872	804.919	802.681	799.007	796.205	793.074	789.897	786.699	831.615
1296	0.9	2	0.9	725.823	711.993	682.466	658.661	637.278	612.781	585.133	559.875	537.582	518.039	504.807	499.36	493.363	490.987	487.127	481.01	476.135	495.895	485.978	477.13	471.914	467.846	490.053	484.54	480.476	478.06	475.688	472.798	487.252	483.333	476.147	468.334	461.573	456.657	452.721	471.315	469.755	494.038	504.304	500.145	505.977	496.285	486.656	480.806	475.625	470.478
1277	2	0.5	6	858.865	858.429	856.384	854.511	860.492	863.41	856.15	847.81	841.809	838.873	835.814	841.394	842.896	846.732	854.819	864.616	866.659	883.628	875.606	869.87	867.788	865.77	863.879	861.519	858.709	857.125	855.885	854.682	857.356	857.191	853.209	848.028	843.521	839.673	836.554	834.91	835.236	841.592	850.21	857.357	858.19	857.295	853.735	849.078	844.44	840.951
1280	2	1	0.1	726.926	667.538	613.925	560.232	511.492	474.736	442.883	410.943	544.406	797.842	738.925	772.598	792.351	803.201	828.595	827.423	801.62	758.725	694.557	625.98	577.678	570.168	574.19	531.115	498.18	483.325	483.302	483.519	483.327	483.421	483.764	482.791	483.447	483.55	483.668	483.599	483.626	483.346	483.467	483.343	483.26	482.984	475.718	464.927	454.669	451.465
182	0.7	1	0.5	908.114	1092.58	1099.72	1100.15	1086.65	1018.21	928.372	853.131	796.171	731.948	661.754	601.912	545.274	562.235	595.401	635.117	571.56	481.403	406.881	369.68	352.69	342.491	396.158	620.463	1007.71	1083.2	1101.82	1102.63	1102.33	1087.9	1055.97	981.707	928.634	887.077	926.805	1099.46	1092.07	1101.3	1102.11	1101.78	1102.12	1096.55	1041.37	970.636	922.802	880.237
1152	7	0.9	0.6	0	0	0	0	0	0	0	0	0	0	0	0	0	0	0	0	0	0	0	0	0	0	0	0	0	0	0	0	0	0	0	0	0	0	0	0	0	0	0	0	0	0	0	0	0	0
1295	0.7	5	0.8	297.774	333.75	333.854	340.8	339.86	332.978	318.45	304.011	292.679	287.29	281.971	281.188	279.937	289.234	285.035	278.874	282.556	315.159	316.008	303.804	300.707	296.463	325.696	316.464	318.266	323.829	331.491	336.213	339.691	330.392	321.269	312.313	301.337	297.882	314.559	325.669	329.204	340.378	336.255	330.831	334.005	320.575	311.264	309.374	308.109	303.272
629	9	0.2	1.5	329.296	207.112	16.4986	26.6793	95.4206	59.0568	17.059	33.0867	25.7606	23.5027	24.2858	25.0695	24.2127	37.3937	33.5033	35.2515	31.6213	35.1227	34.9366	37.7488	39.1153	39.2634	37.7753	37.3391	41.4992	39.7526	35.5966	33.2192	33.7462	36.971	37.542	44.9514	41.0262	46.672	44.8512	49.3435	44.6372	42.4672	48.3764	41.3606	40.4484	43.1473	44.9546	86.2178	41.2642	48.0624
1266	2	0.4	0.1	479.183	482.212	481.049	480.973	482.002	480.979	480.609	479.998	478.832	478.686	478.27	478.097	476.201	474.712	473.301	470.913	469.801	470.433	470.451	467.914	468.637	469.36	470.897	471.577	472.153	473.35	474.655	476.857	480.425	480.954	480.518	478.688	475.837	473.948	473.955	482.014	481.115	503.243	508.623	490.865	489.062	484.431	480.825	481.05	480.987	480.735
1176	2	0.4	0.1	437.543	429.263	419.719	409.037	402.791	405.509	414.263	428.108	451.367	665.794	647.034	678.037	628.675	580.731	553.186	505.254	479.419	479.07	478.812	478.928	478.27	484.141	478.468	478.082	476.704	478.623	478.429	475.245	503.528	542.122	567.956	528.904	489.468	479.093	478.362	478.441	478.898	497.975	478.819	478.818	478.939	478.963	478.757	478.871	478.495	501.009
758	1.5	3	10	38.2646	47.0914	53.6367	57.1873	51.2734	49.3729	56.2215	56.8571	54.7012	53.8209	61.4945	51.8464	50.3866	52.1549	53.4244	61.5373	55.0218	58.578	59.2911	62.5001	60.8246	64.0499	63.5218	56.9782	60.379	54.8977	60.2455	63.0334	56.766	60.3369	54.7185	56.0883	58.7672	56.9845	54.3022	58.2088	50.7422	47.4618	51.5798	54.1873	53.394	56.4071	60.4172	58.4003	60.2485	56.0329
1242	4	1.5	10	0.0212236	0.401433	0.476348	0.0147914	0.289869	0.336353	0.210127	0.610499	18.3678	3.1655	0.131529	1.56669	1.96907	0.542708	0.000892602	1.31169	0.596359	0.0105123	0.237803	9.07777	23.9106	12.6464	8.32859	7.65263	7.53208	8.44773	5.56589	3.50305	2.93064	2.77319	3.18892	3.36079	3.2404	3.78725	3.89762	8.02809	36.728	31.8443	3.20987	9.04095	2.53688	0.0567107	0.0344262	0.241302	0.647046	3.73843
1236	0.7	6	0.7	399.104	395.026	390.885	385.931	380.488	353.604	284.186	224.214	206.066	202.636	199.854	198.821	199.267	199.067	200.114	202.365	202.174	199.385	189.758	176.703	169.71	182.601	190.123	192.267	194.717	197.48	200.838	203.805	206.068	208.598	206.434	197.921	192.646	191.441	191.458	191.251	190.716	190.699	191.646	193.507	193.731	190.277	181.251	170.212	163.073	160.292
1194	1	2	0.6	382.368	373.113	365.064	353.584	325.321	290.666	253.233	218.115	198.928	198.02	198.05	198.833	199.997	199.388	199.356	200.015	199.938	198.989	194.882	188.767	184.18	219.517	201.143	199.87	201.303	201.246	201.142	201.317	218.61	202.293	200.753	201.089	201.557	201.561	201.323	201.319	200.677	199.958	199.758	199.794	199.067	197.675	193.934	189.157	184.723	180.928
[truncated: 434 more columns]

## Sheet: Outflow(OBS inflow-No Demand)
grand_id	q1	q2	q3	1980-01	1980-02	1980-03	1980-04	1980-05	1980-06	1980-07	1980-08	1980-09	1980-10	1980-11	1980-12	1981-01	1981-02	1981-03	1981-04	1981-05	1981-06	1981-07	1981-08	1981-09	1981-10	1981-11	1981-12	1982-01	1982-02	1982-03	1982-04	1982-05	1982-06	1982-07	1982-08	1982-09	1982-10	1982-11	1982-12	1983-01	1983-02	1983-03	1983-04	1983-05	1983-06	1983-07	1983-08	1983-09	1983-10
753	0.9	0.6	0.1	1374.88	1243.78	1381.6	1339.6	1380.92	1789.03	1745.01	1451.94	1511.35	1801.31	1343.15	1378.64	1380.62	1247.3	1383.45	1329.45	1372.29	3190.75	2052.94	1438.21	1335.93	1381.08	1338.07	1381.84	1375.27	1247.46	2223.03	2573.09	2054.32	3853.52	3647.68	1729.21	1338.42	1801.85	1383.65	1383.2	1423	1772.58	1993.85	1354.43	1380.1	2312.11	2670.31	1430.91	1336.08	1379.21
870	1	0.7	0.1	1708.16	1558.83	1740	1704.6	1714.16	1659.66	1721.14	1723.54	1665.52	1720.21	1670.71	1724.63	1717.93	1558.55	1771.03	1660.39	1707.77	1665.51	1727.94	1720.36	1663.34	1713.66	1644.92	1708.44	1711.88	1565.4	3070.69	2806.03	3632.62	2199.48	2015.62	1719.5	1662.28	1717.98	2104.28	1945.69	1718.08	1866.77	3025.19	1877.24	1849.51	1659.74	1714.16	1721.57	1673.64	1705.89
597	0.6	0.7	0.8	665.529	604.465	678.816	653.684	2375.7	3413.77	1017.09	673.978	650.346	667.277	644.381	664.675	661.326	590.355	649.264	618.978	653.207	663.705	656.811	624.716	608.272	645.407	612.039	616.111	599.661	554.23	649.204	628.298	756.073	751.671	719.325	679.389	656.947	679.416	657.155	678.085	675.188	611.505	679.98	952.378	3185.93	6450.97	4016.89	1399.59	658.019	739.216
307	0.8	0.6	0.4	385.315	344.557	393.07	403.939	407.539	649.502	736.706	536.594	366.332	377.741	388.818	382.139	402.629	361.089	425.673	393.508	507.544	904.222	724.778	553.312	495.125	505.014	492.146	511.774	498.135	500.57	637.778	606.534	609.802	780.954	773.182	584.404	525.157	540.462	520.584	536.257	537.212	493.007	563.686	527.708	568.543	596.803	632.945	584.745	523.437	520.356
1753	5	2	0.6	6688.99	4059.13	11026.5	8127.25	4685.05	2657.28	2881.35	2296.52	2248.31	1817.52	2583.93	2117.39	1687.46	3677.7	2115.66	2053.47	1402.6	2797.05	2457.85	2502.45	2018.03	1907.38	1828.68	3684.24	10743.3	8287.2	6106.67	2877.74	1847.72	1866.13	2871.18	3632.26	2795.08	2508.77	3905.13	10505.8	5526.64	6232.81	4046.41	8117.93	6800.46	5396.14	3199.73	2864.57	1975.31	1505.84
297	0.8	0.1	0.1	573.16	468.687	394.663	326.998	1032.7	2030.76	843.082	652.492	623.206	632.607	593.829	590.074	601.806	504.233	547.6	536.944	709.087	2358.4	2231.83	954.947	630.797	641.616	603.736	598.945	564.495	496.13	560.843	524.147	668.37	2252.57	1564.02	783.495	631.645	649.101	616.135	616.566	602.691	526.576	578.817	555.986	685.323	1788.81	1655.12	759.267	629.829	638.221
1036	2	0.6	0.1	193.771	182.646	249.574	263.983	246.673	240.916	283.385	242.534	216.922	194.034	191.438	191.726	175.908	171.103	184.308	171.002	185.232	185.426	184.26	191.694	165.484	161.347	167.586	168.474	221.677	350.179	321.264	267.781	215.439	249.438	290.326	245.329	232.492	211.641	207.792	1365.4	852.278	476.931	530.762	965.028	1012.67	311.024	488.375	352.234	266.836	209.209
989	2	0.1	0.1	54.7305	328.706	693.168	1462.53	254.084	96.2645	57.2003	93.0437	54.6148	54.8422	52.6759	54.621	54.2025	48.6938	53.8964	51.6917	493.998	1349.39	1852.55	940.476	176.25	499.1	704.381	511.491	437.373	1280.75	1110.59	276.593	1108.19	2076.73	971.327	747.35	237.568	135.948	90.565	1583.2	339.207	610.527	643.884	1950.96	2300.58	1545.74	1239.15	58.2032	91.044	281.735
1026	4	1.5	0.8	88.577	139.921	228.905	280.637	171.399	165.557	170.917	126.558	102.001	69.4133	78.5965	88.2719	67.085	59.7851	85.9105	88.7454	151.547	233.087	258.88	224.105	163.27	130.664	149.556	116.103	181.303	388.577	261.043	239.301	184.165	254.631	266.166	201.415	179.892	139.554	117.792	932.819	293.643	263.2	343.324	660.371	699.703	238.703	288.304	208.752	175.716	146.138
1848	1.5	0.4	0.1	259.91	212.42	311.048	405.168	323.145	270.657	264.864	190.86	60.9845	72.0305	172.386	72.0615	77.6535	149.109	146.85	195.99	153.62	157.058	75.9366	62.8719	64.4707	63.8798	62.1638	65.8276	260.791	282.435	196.142	327.302	152.874	124.109	66.7791	118.065	80.6913	220.247	97.8315	398.218	386.69	295.47	322.358	483.356	779.545	304.177	286.51	277.841	248.642	253.118
1869	2	0.8	0.1	121.942	174.383	401.993	402.254	344.932	311.109	307.89	269.574	93.2793	113.72	97.8258	102.997	92.5227	106.177	111.802	113.492	92.3369	102.511	94.7607	84.3655	81.0248	79.3031	74.4279	72.4293	125.307	130.016	123.048	189.581	166.142	92.7503	99.0786	99.5155	101.08	101.581	90.5761	377.921	561.232	393.512	401.722	379.616	388.711	337.141	319.363	304.894	267.974	108.242
7313	1.5	0.6	0.2	225.342	245.282	302.687	387.119	667.194	652.068	605.737	359.48	284.855	369.878	383.105	335.448	285.728	264.564	302.267	336.472	632.659	1006.63	562.948	487.102	175.861	295.811	355.403	313.594	247.745	318.589	363.656	437.546	670.029	854.469	806.565	549.574	508.923	539.743	432.906	349.498	364.488	300.978	394.948	406.44	534.877	684.643	665.397	569.163	342.142	509.969
1042	1	1.5	0.9	76.5082	84.5533	128.693	178.607	134.842	114.192	94.3106	64.2001	59.5928	59.0949	59.1082	61.0968	56.9978	55.6285	67.3884	79.9468	90.2493	93.4933	77.5004	60.3456	51.6141	46.9471	54.4472	50.8676	57.8648	189.777	148.319	104.764	114.381	134.486	116.084	76.3791	60.5904	51.9323	58.7531	465.511	205.91	102.613	108.635	205.664	357.392	136.56	107.243	78.1278	67.9742	72.6808
884	0.4	0.1	0.1	1854.32	1304.32	1641.03	1539	2140.58	2021.56	2386.64	2751.26	2131.88	1935.48	1913.71	1152.54	1420.66	1349.19	1778.82	2507.98	2237.04	1798.47	2176.17	2324.58	1787.18	1518.11	1129.91	1257.66	1491.14	1083.9	1409.44	1722.2	1733.86	1192.93	1953.6	2348.49	2245.76	1770.68	1918.76	2049.04	2245.21	1582.46	1370.62	828.247	879.123	1594.12	1406.47	2729.58	2047.82	2063.04
1144	10	1.5	0.1	1213.65	1665.1	1144.57	1075.46	1214.78	853.385	560.106	389.108	406.791	1400.29	887.19	1324.1	835.117	805.406	1039.88	789.057	919.647	1605.86	1286.05	756.436	602.233	1708.08	2283.56	1288.72	951.984	2074.44	1883	940.817	1977.12	3399.41	1606.7	1063.28	862.341	834.528	845.944	3655.11	2190.58	1632.44	2168.62	1388.6	1731.07	1194.03	1105.12	807.313	718.612	682.301
1006	2	0.5	0.1	29.4199	30.881	44.1639	56.5755	41.3743	33.9151	32.8335	30.0285	28.3267	29.3023	28.5605	28.5932	27.4396	24.816	28.4643	27.444	33.3328	48.0653	60.1286	37.1752	31.1054	32.6465	43.0023	38.2592	45.0379	116.029	89.1304	44.0054	78.5422	142.189	47.0821	45.1449	44.4606	34.9022	32.405	254.205	78.4575	47.9312	37.3127	234.058	290.954	109.705	67.6364	34.3092	31.1046	81.5078
1048	7	1.5	2	243.657	266.097	388.113	1328.57	1275.05	1057.33	133.624	52.2484	27.4441	61.3212	28.4805	60.385	98.9019	48.999	59.6949	50.8675	269.055	344.23	280.269	162.721	143.627	233.382	708.225	165.639	118.816	428.623	500.697	145.054	1338.59	1967.04	1678.68	614.115	44.12	48.4185	64.017	94.6508	173.153	275.348	452.313	1748.83	1234.29	815.166	673.993	50.1941	78.6949	401.823
1032	3	3	1	30.2631	63.2984	177.169	476.564	210.912	84.7311	6.79989	12.1485	15.5874	11.3437	3.16873	10.2982	2.91867	6.53578	13.2851	28.8853	70.1856	98.5931	106.863	32.3884	50.9514	41.9532	157.756	60.2423	54.1668	172.086	213.813	111.445	176.641	643.648	452.641	108.576	82.388	53.2389	50.4656	112.652	173.889	283.906	270.314	877.672	650.484	282.298	159.311	51.7039	36.8186	86.3192
355	2	0.6	0.7	142.251	155.125	194.625	173.553	259.083	420.843	316.453	139.24	233.007	198.988	195.356	175.731	172.764	147.183	152.777	114.731	297.258	597.07	242.536	123.211	115.938	126.707	154.897	187.393	150.641	178.217	236.873	156.307	165.832	434.68	483.895	221.468	236.954	375.284	268.292	259.884	280.963	262.738	242.023	187.3	289.264	584.149	686.058	196.116	228.012	302.432
1101	0.9	0.2	0.1	104.693	102.384	264.159	543.025	112.988	124.524	109.254	104.348	96.0645	98.4602	95.7229	111.863	94.2483	92.0913	105.072	110.58	98.3159	115.438	114.401	98.0058	95.4059	88.9765	55.5779	38.2809	83.7966	114.321	121.995	114.017	116.036	96.0681	99.3921	96.4456	104.075	90.7743	68.6831	123.306	321.701	187.216	225.912	320.041	348.476	176.211	110.884	106.23	97.0999	96.1421
1023	2	0.1	0.1	132.244	171.37	236.971	689.943	236.387	82.549	35.4898	47.5926	20.6203	20.5516	19.9257	46.5014	20.623	31.6819	33.9355	33.278	133.09	176.77	117.622	94.1387	48.196	119.113	414.512	91.1267	75.7496	239.821	219.735	84.8409	421.16	636	591.206	209.693	33.8599	33.7883	32.9487	47.2051	61.2067	118.16	248.94	606.898	602.795	491.089	379.064	54.447	33.3723	74.5896
1864	1.5	0.7	0.1	61.8911	71.1102	154.776	179.145	148.844	127.969	125.402	80.7688	48.0096	54.7327	53.0803	55.8205	49.7442	54.6007	58.5217	59.8591	51.5202	53.9799	50.1076	46.646	44.9264	46.2707	46.4243	44.1225	60.5726	59.1045	58.0626	69.0103	72.6662	53.4508	49.913	55.5107	72.7908	70.5536	62.3838	189.812	158.662	142.854	189.579	276.2	330.371	141.739	139.098	129.657	132.054	127.427
1021	0.6	2	2	42.2044	51.3589	54.9355	108.14	105.241	72.7129	40.6992	1.64635	1.52545	1.11101	1.04351	2.10571	3.31227	3.04819	14.9908	4.50776	70.2519	32.0874	9.83808	15.9523	56.3646	26.1397	123.86	10.4263	10.4699	35.6638	34.6442	9.98156	149.119	247.112	147.521	11.9271	1.78881	1.44898	1.6577	6.8466	9.96402	21.0567	57.1011	107.395	59.4521	139.188	33.8172	1.53118	6.00986	17.9858
1120	0.9	1.5	0.5	3.71069	3.68453	4.33274	4.4088	4.64223	7.83751	3.91937	3.22281	3.34398	4.00436	3.27404	3.71879	3.22289	2.95326	4.61835	4.25039	5.37637	11.713	4.2931	4.58778	4.84261	7.36968	6.98083	3.48159	3.47147	4.71922	5.69933	5.4446	61.1525	97.028	45.631	6.59581	3.73552	3.65732	3.40552	4.36934	4.84845	5.57721	6.70512	5.34227	19.5806	10.3694	5.8873	3.68533	3.42138	59.3981
182	10	0.6	0.8	1114.91	915.297	469.974	533.846	456.171	289.708	168.86	137.735	124.389	129.503	115.123	139.087	134.716	135.338	159.253	264.172	158.713	124.757	97.8662	90.3286	88.5763	86.2066	152.447	672.597	789.321	1004.47	966.138	1351.41	846.668	400.262	304.963	156.321	143.272	146.987	362.086	829.668	590.706	842.461	1627.72	795.818	896.879	944.793	435.205	182.463	236.934	155.246
7311	10	1.5	0.1	1.6728	1.76805	18.4846	88.0606	11.7682	1.99706	1.64711	1.62766	1.55811	1.5731	1.51561	1.5899	1.55972	1.40292	1.57101	1.55705	1.94388	2.97246	1.83711	1.68409	1.61884	1.74501	4.77827	4.00673	1.78267	11.659	26.4707	2.39465	37.6514	154.201	99.1382	3.83107	1.69618	1.64845	1.60302	7.03562	11.2076	58.4114	27.9232	144.416	91.8079	8.70005	4.44091	1.67602	1.56687	2.9965
1755	2	0.9	0.2	90.4192	92.2076	138.75	123.764	82.836	71.7763	65.4364	58.3538	50.5154	43.3388	15.0738	26.3712	34.6155	120.842	109.411	83.52	80.6112	130.728	84.9978	65.4968	57.4594	53.5051	50.2737	94.4682	148.334	220.041	132.347	92.4585	91.1984	77.4828	70.9811	64.9748	101.339	64.9876	56.2412	98.4509	112.893	101.344	93.3327	139.673	333.212	224.565	161.14	65.7357	57.6815	57.1663
1192	4	4	0.6	307.353	443.018	270.915	412.091	411.618	125.463	65.4953	53.3122	50.2048	54.921	55.2362	67.5512	63.729	61.0222	79.5981	72.7319	227.364	515.85	150.62	63.9028	58.3282	70.0495	79.1347	72.8204	72.1079	169.277	101.998	101.561	141.15	116.971	112.3	64.5733	57.3281	66.8482	68.9143	482.631	210.291	466.733	394.548	195.215	154.462	97.6742	153.874	77.1782	57.76	57.0126
541	10	9	0.9	41.1851	35.8359	39.5317	63.8689	178.532	509.415	239.133	90.8151	64.4167	61.4179	45.7897	44.4714	39.3737	32.5901	38.712	39.3155	57.8796	101.363	81.8557	66.3304	51.134	44.2276	36.8959	36.7869	36.0998	31.3408	37.6935	58.7909	136.568	269.222	202.318	111.673	99.7134	90.1223	61.0086	52.129	45.3867	41.8386	51.3856	60.4448	99.5141	525.339	280.254	153.15	90.1774	65.8464
1716	0.9	1.5	0.8	22.0102	24.2558	46.4523	40.4504	22.6606	18.5925	16.9778	15.1895	13.3072	12.8707	12.1309	15.5441	15.9196	27.8257	25.6017	16.9331	32.2604	52.8804	20.2047	17.514	15.5415	14.6092	13.5685	14.7163	49.4454	111.487	88.5987	28.4282	21.381	20.6529	18.4078	16.2172	14.3995	14.3395	13.3589	141.659	88.2785	51.129	36.8759	73.3388	149.636	73.5376	23.0003	18.8246	16.8383	40.8507
1883	10	1.5	0.5	57.435	64.1026	61.909	84.2845	70.1956	48.083	41.0444	36.5153	18.3925	16.1518	31.647	37.3237	35.1198	47.4604	44.3636	43.2308	54.3349	87.1374	44.7478	48.1224	39.6495	45.0907	35.6879	46.0715	47.635	45.6168	43.0169	54.6921	44.3142	35.4977	20.0795	17.5963	15.3283	14.7917	13.6452	30.9887	86.8599	118.927	115.48	45.8793	67.4426	66.1817	40.562	43.005	45.7575	37.6477
895	0.5	0.1	0.1	1425.27	1063.01	1543.8	2103.87	2302.29	2145.88	2584.89	2694	2528.26	2652.62	2461.67	1211.87	1050.43	917.865	1641.38	2431.52	2472.12	2312.25	2529.48	2402.55	2455.96	2545.56	1376.63	1072.87	1107.95	968.364	1277.11	2095.09	2201.98	1947.34	2301.52	2377.7	2343.36	2595.93	2865.62	1982.94	1826.31	1494.02	1632.32	1199.4	1864.64	1587.95	2081.43	2636.2	2564.91	2670.82
1093	1	5	0.9	32.5016	38.2559	34.7491	62.8586	108.643	73.5457	27.6854	10.2452	4.60358	13.5107	25.3209	41.4961	18.0742	24.7456	80.795	43.1135	93.0666	345.49	60.0082	24.9238	5.89265	56.9822	98.4487	39.3841	47.9359	249.214	113.937	54.3114	248.149	288.475	21.9713	6.92254	1.0659	3.95912	8.30252	209.393	96.8498	59.6554	99.3422	74.2584	425.911	141.272	46.6408	3.99317	1.00542	2.33792
1709	0.6	1	0.8	85.3691	161.264	329.428	276.973	150.823	85.5783	89.1985	87.9791	82.0592	75.6808	72.0352	87.4555	78.9109	170.191	220.473	299.722	329.551	346.066	92.8332	88.9282	94.0478	84.4085	86.3423	217.615	257.364	348.35	482.076	158.628	97.0306	249.354	88.9837	85.7595	75.3491	74.0565	75.756	118.114	88.6843	130.694	257.545	307.283	215.116	108.632	122.445	85.9939	68.992	97.6615
1017	5	1.5	1	33.6144	32.7802	63.6953	80.1785	51.3298	25.2153	10.9887	15.6821	17.525	15.1574	19.0057	20.6389	17.5863	22.1639	22.9295	31.0681	65.7304	88.6937	63.2695	64.8071	17.9119	18.5501	52.0394	39.2086	41.694	130.331	107.262	69.2805	69.9995	48.4573	40.0608	41.5667	109.745	64.4498	37.2839	265.265	200.988	58.5582	48.6068	110.425	332.938	86.9572	42.5013	32.8054	27.3694	31.1388
[truncated: 434 more columns]

## Sheet: Storage(OBS inflow-No Demand)
grand_id	q1	q2	q3	1980-01	1980-02	1980-03	1980-04	1980-05	1980-06	1980-07	1980-08	1980-09	1980-10	1980-11	1980-12	1981-01	1981-02	1981-03	1981-04	1981-05	1981-06	1981-07	1981-08	1981-09	1981-10	1981-11	1981-12	1982-01	1982-02	1982-03	1982-04	1982-05	1982-06	1982-07	1982-08	1982-09	1982-10	1982-11	1982-12	1983-01	1983-02	1983-03	1983-04	1983-05	1983-06	1983-07	1983-08	1983-09	1983-10
753	0.9	0.6	0.1	29594.7	29478.2	29550.7	29710.1	29555.1	30014.1	30218.8	30198.8	30214.4	30220	30194.3	29872.9	29800.8	29773.9	29926.3	29549.2	29229.8	30171.2	30214	30128.9	29870.6	29786.3	29855.9	29879.2	29606.4	29669.6	30173.3	30219.8	30219.7	30220	30220	30219.3	30097.5	30207.6	30193.6	30146.8	30176.4	30215	30217.6	30114.5	29834.8	30170.3	30220	30165.9	29907.9	29733.7
870	1	0.7	0.1	27966.5	28255.5	28833.8	29012.3	28560.5	28262.3	28040.5	27932.8	27819.4	27788.2	28008.5	28228.2	28203.4	28591.6	29044.5	28769.8	28249.7	28224.7	28527.5	28990.7	28824.5	28507.7	27993.8	27809.8	27717.6	28381.3	29099.7	29090.4	29083.1	29106.7	29097.4	28958.4	28738.3	28700	28992.6	29095.7	28889.2	29019.8	29110	29108.8	29045.5	28612	28243.7	28018.9	28178.9	27852.4
597	0.6	0.7	0.8	23453.1	23439.1	23637.3	23699.9	24879	25068.9	25038	24606.6	24312.4	24004.1	23767.5	23578.2	23361	23064	22763.5	22356	22143.1	22354.6	22128.3	21613.2	21256.8	21133.7	20922.7	20629.1	20246.2	20027.2	20034.1	20000.1	20904.8	22506.8	23760	23846.9	23950.8	24100.6	24267.9	24387.7	24341.6	24378.3	24633.4	24977.1	25070	25070	25070	25070	25009.3	25064.6
307	0.8	0.6	0.4	16358.5	16274.8	16231.3	16254.9	16144.9	16642.9	16950.8	16604	16341.2	16217	16239.2	16154.9	16176.3	16166	16257.8	16216.9	16426.6	18083.6	18532.4	18165.1	17731.2	17427.4	17197	16988.5	16737.8	16716.1	16966.9	17104.9	17171.8	18328	19337	19181.2	18927.1	18769.9	18625.5	18502.4	18375.4	18276.7	18251	18086.4	18026.1	18107.9	18226.4	18063.4	17783.4	17538.5
1753	5	2	0.6	2851.67	2802.14	3607.98	2875.85	2814.44	2887.33	2880.78	2876.93	2891.38	2925.57	2918.79	2856.04	2877.41	2876.86	2686.01	2824.57	2630.11	2899.32	2884.87	2903.41	2892.59	2895.81	2870.96	2886.97	3287.71	2710.58	2739.23	2720.66	2808.99	2912.2	2895.55	2866.35	2891.21	2897.8	2888.95	2981.24	2771.65	2805.22	2809.79	3677.76	3495.48	2825.23	2864.56	2888.15	2906.98	2857.01
297	0.8	0.1	0.1	5987.41	5575.4	5264.56	5247.78	6776.35	7434.2	7433.21	7366.72	7159.79	6917.87	6622.1	6294.72	6117.26	5796.6	5526.01	5325.28	6074.99	7432.55	7434.2	7433.02	7349.68	7119.45	6819.71	6471.43	6068.74	5744.89	5531.91	5283.39	5654.25	7199.1	7434.2	7428.81	7367.26	7254.75	7019.35	6705.65	6414.8	6119.72	5886.31	5678.52	6144.84	7413.68	7434.2	7427.77	7316.89	7061.21
1036	2	0.6	0.1	3904.26	3862.03	3960.25	4115.38	4148.69	4206.71	4379.55	4360.01	4296.8	4158.08	4071.73	3969.97	3832.78	3766.32	3680.18	3579.9	3524.74	3484.12	3415.18	3378.53	3289.84	3201.67	3159.23	3100.51	3186.59	3761.25	3983.62	4114.51	4047.1	4173.31	4377.48	4383.6	4382.37	4283.59	4227.8	5001.47	4721.6	4640.85	4649.17	4687.32	4699.41	4639.36	4654.1	4645.78	4607.39	4459.83
989	2	0.1	0.1	4362.61	4422.81	4484.35	4618.57	4462.86	4464.57	4465.88	4474.14	4463.17	4429.67	4406.44	4392	4367.98	4348.65	4330.35	4301.93	4402.05	4965.23	5641.02	4660.86	4466.91	4478.46	4469.38	4466.69	4474.5	4550.68	4535.68	4464.14	4544.21	5191.96	4543.11	4526.09	4473.46	4460.12	4465.54	4622.55	4460.74	4466.48	4476.17	5990.25	6385.9	5977.37	4909.35	4472.74	4473.63	4476.78
1026	4	1.5	0.8	875.109	926.932	1000.22	1111.65	1066.26	1077.61	1067.24	1026.3	975.581	916.464	894.792	868.746	819.598	789.763	776.745	761.24	813.062	918.247	978.39	1021.29	995.138	977.764	997.713	963.277	1019.02	1358.14	1315.42	1365.95	1340.2	1464.88	1511.14	1507.49	1490.32	1433.48	1382.92	1837.27	1592.55	1638.66	1692.2	1760.57	1743.78	1623.21	1683.74	1639.93	1609.06	1555.99
1848	1.5	0.4	0.1	2611.1	2602.24	2832.78	3293.72	3245.02	3046.85	2848.87	2645.63	2577.62	2590.14	2605.04	2592.45	2596.88	2599.93	2600.31	2614.78	2596.9	2587.51	2589.92	2564.86	2577.82	2568.84	2570.88	2587.6	2636.08	2630.87	2599.52	2630.51	2595.36	2595.59	2590.25	2595.27	2594.33	2631.95	2594.11	2926.35	3367.7	3427.54	3508.64	3661.83	3706.22	3563.71	3333.51	3119.15	2896.67	2714.75
1869	2	0.8	0.1	2221.08	2324.25	2638.27	3197.73	3183.11	2959.83	2736.42	2479.6	2310.08	2299.74	2242.49	2200.39	2131.05	2145.86	2123.66	2117.04	2042.65	2019.32	1962.7	1885.81	1827.31	1767.57	1713.39	1660.26	1727.21	1787.07	1796.65	2033.38	2116.38	2037.16	1991.17	1952.89	1928.19	1901.99	1866.18	2374.27	2798.68	2891.04	2882.68	3019.39	3141.18	3164.81	2937.83	2701.66	2462.99	2318.26
7313	1.5	0.6	0.2	1754.53	1759.02	1758.41	1764.82	1877.67	2179.17	2221.53	1817.62	1753.64	1758.37	1757.86	1757.6	1759.24	1758.08	1759.56	1758.91	1867.7	2484.89	2398.58	1956.76	1718.08	1746.12	1758.48	1758.89	1759.19	1759.38	1758.93	1757.08	1832.17	2268.08	2511.73	2219.18	1914.39	1794.88	1757.49	1758.68	1759.15	1758.56	1758.51	1760.4	1764.2	2005.29	2157.12	1894.5	1758.94	1757.02
1042	1	1.5	0.9	595.409	603.848	632.397	704.802	689.494	688.974	663.503	626.181	601.004	579.702	565.998	551.652	532.36	523.2	515.465	518.389	525.679	528.647	512.164	491.765	470.656	455.395	450.047	435.141	432.65	574.978	546.598	537.329	551.371	584.633	575.865	548.232	527.081	506.178	501.768	885.932	819.564	797.636	792.705	925.955	985.978	922.225	902.08	854.274	818.036	800.583
884	0.4	0.1	0.1	2342.64	2342.52	2340.08	2342.34	2343.23	2343.03	2343.6	2343.54	2343.6	2343.06	2342.32	2341.47	2323.65	2339.56	2343.39	2343.6	2343.55	2342.78	2343.6	2343.6	2343.22	2341.98	2335.09	2341.45	2342.68	2341.87	2342.47	2342.78	2341.31	2330.47	2343.54	2343.6	2343.14	2343.55	2343.6	2343.6	2343.6	2343.6	2342.97	2313.12	2336.9	2341.86	2333.12	2343.6	2343.6	2343.6
1144	10	1.5	0.1	928.696	989.764	885.281	890.217	888.907	891.287	895.157	899.846	901.39	1075.16	890.23	985.319	889.84	893.726	890.444	892.407	895.342	1279.89	945.393	893.574	896.035	1106.07	1061.33	888.95	890.207	1338.77	1082.33	887.597	1137.48	1066.73	873.666	885.606	891.35	894.759	894.21	1349.42	1142.74	964.88	1179.3	883.192	908.464	884.467	887.444	895.188	894.617	897.192
1006	2	0.5	0.1	1205.4	1214.03	1258.27	1373.35	1383.33	1368.41	1339.26	1301.08	1269.04	1245.57	1230.65	1212.25	1189.1	1171.43	1157.1	1140.95	1149.48	1230.8	1341.71	1336.85	1314.92	1304.78	1356.22	1363.83	1385.59	1442.03	1441.68	1439.39	1443.31	1450.22	1428.46	1421.29	1434.06	1416.12	1400.85	1503.51	1443.28	1441.04	1434.12	1512.24	1555.93	1447.77	1436.05	1402.53	1372.2	1396.35
1048	7	1.5	2	200.558	195.572	197.104	223.859	171.396	209.842	156.481	166.534	196.352	200.254	201.386	201.982	201.028	201.461	201.937	201.079	205.148	190.091	191.939	197.344	198.89	203.601	222.417	189.359	202.393	201.289	189.44	194.086	678.538	1288.72	1043.26	261.982	200.035	201.621	201.657	202.589	201.286	198.899	204.456	320.994	215.354	167.603	171.055	164.085	191.776	264.049
1032	3	3	1	192.734	207.511	243.686	464.707	292.407	221.773	191.019	191.141	191.513	190.418	190.293	191.599	189.542	191.023	191.715	195.833	202.34	210.083	207.648	192.31	196.09	203.356	245.824	193.126	195.835	266.62	256.012	205.43	291.173	662.023	597.613	416.178	355.267	299.232	263.475	275.248	277.613	383.439	326.948	669.111	624.86	469.474	387.567	289.571	245.708	261.141
355	2	0.6	0.7	1224.61	1224	1223.84	1222.95	1225.78	1221.22	1202.12	1178.44	1220.63	1223.16	1222.62	1223.71	1224.33	1223.48	1223.78	1224.62	1230.78	1308.62	1191.87	1129.35	1105.06	1152.32	1213.68	1222.98	1223.53	1222.93	1222.59	1222.86	1223.53	1241.36	1231.73	1214.34	1216.99	1220.95	1222.15	1222.49	1222.38	1222.59	1222.32	1223.3	1225.67	1272.25	1356.49	1219.27	1222.41	1222.92
1101	0.9	0.2	0.1	1375.34	1401.98	1456.41	1702.43	1673.59	1672.14	1621.45	1547.51	1467.77	1410.57	1371.04	1395.49	1331.28	1317.68	1307.68	1342.1	1297.12	1371.52	1389.16	1336.95	1303.05	1240.87	1201.96	1192.55	1200.31	1299	1347.73	1395.85	1436.97	1382.28	1340.93	1298.62	1297.97	1241.94	1200.29	1390.53	1679.98	1697.54	1688.44	1684.34	1701.75	1690.86	1660.55	1585.65	1499.49	1422.62
1023	2	0.1	0.1	1138.54	1137.49	1140.63	1336.93	1138.16	1137.83	1131.86	1133.67	1140.17	1139.58	1140.95	1136.07	1133.8	1139.72	1138.21	1138.02	1138.49	1137.68	1136.48	1138.33	1139.82	1138.93	1169.72	1138.16	1139.03	1143.39	1136.99	1137.85	1201.49	1499.12	1499.77	1161.88	1138.45	1137.48	1139.23	1138.83	1138.49	1138.54	1144.01	1552.35	1351.16	1161.48	1162.68	1134.75	1135.96	1138.71
1864	1.5	0.7	0.1	1002.15	1038.22	1151.73	1346.12	1321.64	1231.14	1139.99	1048.77	1003.44	995.936	987.202	982.218	955.874	972.292	971.46	982.481	956.445	951.308	924.431	891.111	865.615	843.313	828.409	809.312	838.411	865.654	869.261	924.939	966.119	950.578	924.002	925.532	987.378	1026.13	1024.54	1218.27	1433.6	1477.54	1482.54	1489.27	1488.83	1427.66	1347.82	1244.76	1179.67	1100.61
1021	0.6	2	2	251.869	226.63	196.224	176.19	129.418	132.012	115.014	109.616	110.076	110.574	110.716	117.057	120.459	121.791	121.972	121.757	131.578	120.437	121.496	122.051	127.658	122.215	137.739	119.606	121.736	122.559	121.971	121.667	155.44	136.761	129.864	109.564	109.372	110.066	112.692	121.02	121.75	121.864	123.631	126.589	120.959	126.55	112.234	106.131	114.559	122.207
1120	0.9	1.5	0.5	425.733	425.108	423.375	421.255	420.339	425.951	416.461	408.648	403.973	402.202	399.193	398.183	394.768	391.797	392.761	391.51	392.906	410.418	402.659	401.358	401.714	409.806	414.253	410.79	407.956	410.19	412.366	412.32	461.656	475.089	461.966	450.201	444.832	440.863	437.299	437.3	437.613	442.061	445.357	445.463	455.126	459.226	455.426	446.72	439.75	496.494
182	10	0.6	0.8	675.775	689.658	688.164	712.189	710.644	714.215	598.209	512.026	512.708	517.789	506.99	543.94	554.359	605.974	667.041	695.798	667.265	410.013	221.924	175.68	161.944	149.197	262.964	580.468	684.229	714.459	681.624	671.949	682.532	701.35	633.765	570.665	594.317	621.321	707.098	713.198	682.863	689.785	658.94	674.64	693.358	684.122	699.434	744.363	728.143	709.009
7311	10	1.5	0.1	395.959	400.196	419.787	442.049	418.739	417.513	412.596	407.331	402.816	399.484	397.338	396.117	394.249	392.467	391.052	389.978	394.182	415.091	414.357	411.372	408.141	407.492	417.953	418.528	418.398	419.321	422.158	417.719	431.009	488.497	449.408	417.534	414.671	411.968	410.616	413.324	419.111	433.964	423.022	482.888	434.065	419.141	417.89	412.816	409.541	412.131
1755	2	0.9	0.2	440.337	468.683	561.64	626.645	596.515	567.94	531.619	491.435	452.266	415.369	401.043	401.817	403.793	514.898	517.067	512.165	498.905	625.858	584.994	544.35	506.359	468.276	438.09	475.127	613.091	703.02	687.356	688.785	685.247	654.761	612.561	570.505	618.906	561.592	520.386	568.573	612.39	666.839	657.068	691.196	865.479	915.316	751.738	655.547	596.721	550.46
1192	4	4	0.6	340.885	344.028	347.806	349.202	346.696	326.76	296.749	272.712	256.017	252.972	253.771	268.268	267.838	277.79	300.635	307.424	339.475	345.699	327.518	290.664	283.715	298.041	322.46	323.21	326.867	357.874	352.607	365.176	362.34	356.472	355.415	326.089	306.046	307.216	317.071	353.624	329.32	351.448	346.188	351.584	353.089	351.466	354.466	325.547	302.79	287.486
541	10	9	0.9	139.057	134.925	131.116	151.585	270.602	317.203	281.289	218.06	200.071	190.189	176.555	169.428	159.125	150.478	145.761	141.97	147.889	183.132	161.428	148.221	132.763	122.592	116.392	112.767	110.995	106.998	107.002	121.475	186.779	297.64	282.132	259.965	270.85	271.266	253.713	240.748	226.585	217.074	213.77	216.043	251.857	326.717	280.544	263.678	240.358	224.904
1716	0.9	1.5	0.8	238.263	247.545	277.557	292.376	282.16	273.681	264.563	252.459	242.209	235.1	231.625	233.805	229.271	249.036	245.835	240.092	260.701	286.059	269.627	262.635	255.277	247.024	243.401	241.772	275.86	324.075	301.009	290.422	282.562	283.075	274.621	261.941	255.637	251.043	245.375	334.688	306.28	300.93	296.344	308.951	366.999	316.302	289.933	275.55	264.672	280.313
1883	10	1.5	0.5	293.923	292.172	290.569	298.077	298.312	288.979	289.402	288.755	279.178	278.777	287.709	289.595	289.611	290.038	289.612	289.578	290.313	299.068	289.252	289.518	289.451	289.485	289.554	289.86	289.819	289.633	289.415	289.834	289.491	288.526	285.544	285.983	279.233	275.122	271.272	286.149	303.785	330.36	301.463	289.776	293.904	289.668	289.375	289.251	289.544	289.528
895	0.5	0.1	0.1	665.216	665.712	665.273	666.1	666.1	666.1	666.1	666.1	666.1	666.1	666.1	665.914	661.596	644.007	653.306	666.1	666.1	666.1	666.1	666.1	666.1	666.1	666.1	665.29	663.949	655.999	600.81	666.1	666.1	665.546	666.1	666.1	666.1	666.1	666.1	666.1	666.1	666.1	665.396	658.922	666.1	659.241	656.789	666.1	666.1	666.1
1093	1	5	0.9	57.7272	66.2233	57.2757	79.4079	122.845	104.48	76.7612	60.6483	53.1418	57.8049	57.4565	71.6285	53.7153	62.7002	93.1905	73.0252	123.171	145.284	53.8007	53.4352	52.4421	103.166	122.077	95.9798	87.5731	189.61	154.023	123.43	160.751	127.256	52.4647	52.5992	51.9845	52.3558	54.4747	172.037	139.19	135.272	165.45	165.008	187.512	87.8595	66.5557	52.1572	52.1336	52.1836
1709	0.6	1	0.8	456.429	500.933	509.869	509.845	506.035	494.782	490.429	488.729	465.741	412.297	385.339	431.235	408.493	456.341	509.802	509.9	509.887	509.898	496.238	500.947	498.809	465.412	498.065	508.831	509.722	509.9	509.9	509.9	491.807	507.42	497.419	471.863	423.493	388.172	385.422	492.828	493.62	508.035	509.9	509.9	509.899	506.458	487.688	468.253	398.447	340.64
1017	5	1.5	1	53.4042	57.8404	66.3799	77.8681	58.0793	51.0657	50.5502	50.9997	50.6344	50.5429	50.5303	50.4463	50.5109	50.7635	50.4948	52.4416	78.1052	81.8505	73.6166	69.5457	50.7569	50.7248	66.607	52.376	55.6948	139.072	117.322	106.244	103.215	91.7917	78.7348	81.8421	124.944	97.5054	80.6922	271.736	231.287	178.922	159.955	192.524	291.769	182.799	154.994	135.665	119.829	110.542
[truncated: 434 more columns]
